# Supplementary material for: π-Stacking Stopper-Macrocycle Stabilized Dynamically Interlocked [2]Rotaxanes
Source: MDPI journal article supplement (doi:10.3390/molecules26154704), 2021-08-03
Supplement: s1 [file s1]

## Electronic Supplementary Information

### $\pi$ -Stacking Stopper-Macrocycle Stabilized Dynamically Interlocked [2]Rotaxanes

Sing-Ming Chan,<sup>a</sup> Fung-Kit Tang,<sup>a</sup> Ching-Yau Lam,<sup>a</sup> Chak-Shing Kwan,<sup>a</sup> Sam C. K.  
Hau<sup>\*b</sup> and Ken Cham-Fai Leung<sup>\*a</sup>

<sup>a</sup> Department of Chemistry, The Hong Kong Baptist University, Kowloon Tong,  
Kowloon, Hong Kong SAR, P. R. China  
E-mail: cfleung@hkbu.edu.hk

<sup>b</sup> Department of Chemistry, The Chinese University of Hong Kong, Shatin, New  
Territories, Hong Kong SAR, P. R. China  
E-mail: sckhau@cuhk.edu.hk

## Synthesis

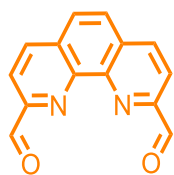

The synthesis of dialdehyde **1** was reported in the literature [1].

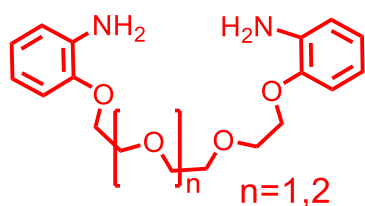

The synthesis of diamines **3** and **4** was reported in the literature [2].

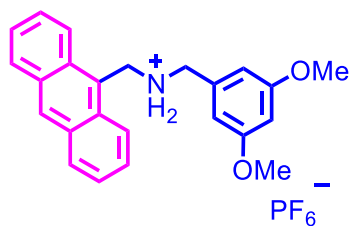

The synthesis of **5-H**·PF<sub>6</sub> was reported in the literature [3].

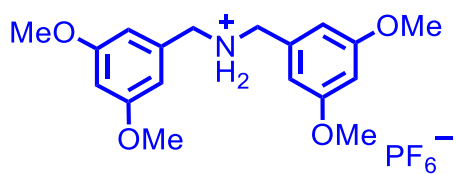

The synthesis of **7-H**·PF<sub>6</sub> was reported in the literature [3].

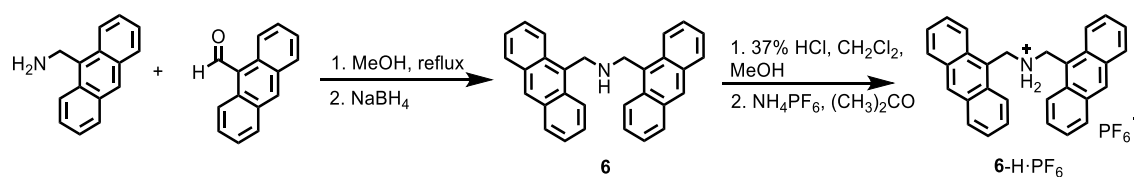

**Scheme S1.** Synthesis of the thread **6-H·PF<sub>6</sub>**.

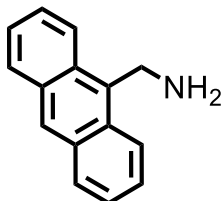

The synthesis of 9-aminomethylanthracene was reported in the literature [4].

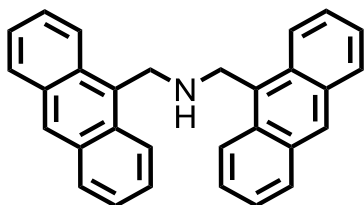

Synthesis of compound **6**:

A solution of 9-aminomethylanthracene (0.20 g, 0.98 mmol) in THF/MeOH (1:2, v/v, 30 mL) was added 9-anthracenecarboxaldehyde (0.20 g, 0.98 mmol) in THF/MeOH (1:2, v/v, 30 mL). The mixture was refluxed for overnight. Then the mixture was cooled to 0 °C and NaBH<sub>4</sub> (0.24 g, 6.34 mmol) was added. The mixture was refluxed for overnight. After that, solvent was evaporated under reduced pressure. The mixture was dissolved in EtOAc (100 mL) and washed with water (20 mL). The organic layer was dried with MgSO<sub>4</sub> and concentrated by evaporation. The crude product was purified by silica gel column chromatography with CH<sub>2</sub>Cl<sub>2</sub> to afford **6** as a pale-yellow solid (0.22g, 56%).

<sup>1</sup>H NMR (400 MHz, CDCl<sub>3</sub>) δ 8.40 (s, 2H), 8.28 – 8.19 (m, 4H), 8.03 – 7.95 (m, 4H), 7.48 – 7.36 (m, 8H), 4.94 (s, 4H). NH signal is missing.

<sup>13</sup>C NMR (101 MHz, CDCl<sub>3</sub>) δ 131.62, 131.45, 130.55, 129.24, 127.39, 126.16, 125.02, 124.16, 45.71.

HRMS (ESI): calcd. for C<sub>30</sub>H<sub>23</sub>N [M+H]<sup>+</sup> *m/z* 398.1903, found 398.1890

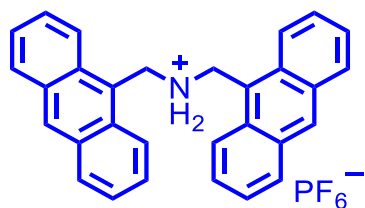

Synthesis of thread **6-H**·PF<sub>6</sub>:

A solution of **6** (0.22 g, 0.55 mmol) in CH<sub>2</sub>Cl<sub>2</sub>/MeOH (10 mL) was added conc. HCl (2 mL). The mixture was stirred for 2 hours. Then the solvent was evaporated under reduced pressure. The mixture was dissolved in acetone (50 mL) and saturated NH<sub>4</sub>PF<sub>6</sub> aqueous solution was added. The mixture was stirred for 2 hours. Then the organic solvent was evaporated under reduced pressure. The precipitate was filtered and washed with water to afford **6-H**·PF<sub>6</sub> as a pale-yellow solid (0.22g, 73%).

<sup>1</sup>H NMR (400 MHz, CD<sub>3</sub>CN) δ 8.62 (s, 2H), 8.23 – 8.17 (m, 4H), 8.12 – 8.04 (m, 4H), 7.58 – 7.47 (m, 8H), 5.25 (s, 4H). NH signal is missing.

<sup>13</sup>C NMR (101 MHz, CD<sub>3</sub>CN) δ 132.36, 131.67, 130.37, 130.31, 128.00, 126.43, 124.52, 45.53.

HRMS (ESI): calcd. for C<sub>30</sub>H<sub>24</sub>F<sub>6</sub>NP [M–PF<sub>6</sub>]<sup>+</sup> *m/z* 398.1903, found 398.1890

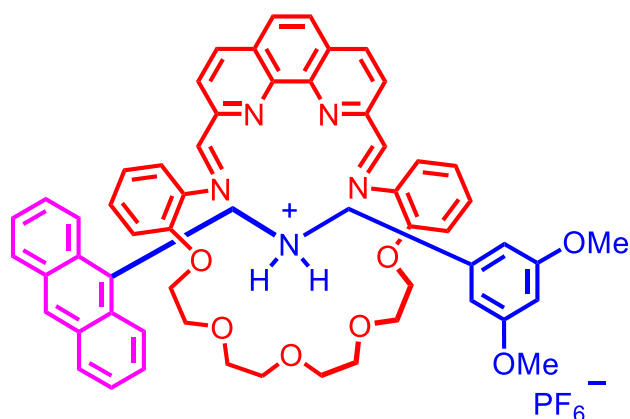

Synthesis of **8-H**·PF<sub>6</sub>:

A solution of thread **5-H**·PF<sub>6</sub> (50.3 mg, 0.1 mmol) in MeCN (15 mL) was added diamine **3** (37.6 mg, 0.1 mmol) and dialdehyde **1** (23.6 mg, 0.1 mmol). The yellow mixture was stirred for overnight at room temperature. The solvents were evaporated under reduced pressure. The mixture was purified by neutral aluminum oxide column chromatography with (1/3, v/v) CH<sub>2</sub>Cl<sub>2</sub>/*n*-hexane, followed by CH<sub>2</sub>Cl<sub>2</sub> to afford **8-H**·PF<sub>6</sub> as a pale-yellow powder (94.0 mg, 87%).

<sup>1</sup>H NMR spectrum (400 MHz, CD<sub>3</sub>CN) δ 10.82 (br, 2H), 8.66 (d, *J* = 8.7 Hz, 2H), 8.40 (s, 2H), 8.08 (d, *J* = 8.1 Hz, 2H), 7.73 (s, 2H), 7.65 (s, 1H), 7.44 (dd, *J* = 8.2, 2.4 Hz, 4H), 7.26 – 7.07 (m, 8H), 6.64 (td, *J* = 7.4, 1.5 Hz, 2H), 6.41 (d, *J* = 2.1 Hz, 2H), 6.08 (dd, *J* = 7.6, 1.5 Hz, 2H), 5.96 (t, *J* = 2.1 Hz, 1H), 5.75 – 5.64 (m, 2H), 4.72 – 4.60 (m, 2H), 4.60 – 4.50 (m, 2H), 4.37 – 4.27 (m, 2H), 4.15 – 4.02 (m, 2H), 3.91 – 3.78 (m, 2H), 3.31 (dd, *J* = 9.9, 6.6 Hz, 2H), 3.17 (s, 6H), 3.00 – 2.86 (m, 4H), 2.59 – 2.44 (m, 2H).

<sup>13</sup>C NMR spectrum (101 MHz, CD<sub>3</sub>CN) δ 162.39, 160.96, 152.29, 145.10, 142.33, 138.57, 136.50, 131.63, 130.85, 130.38, 130.21, 128.96, 128.30, 127.19, 126.55, 125.85, 124.69, 121.98, 121.23, 112.56, 104.05, 100.08, 71.14, 71.06, 70.82, 69.43, 60.96, 55.50, 53.16, 45.01.

HRMS (ESI): calcd. for C<sub>58</sub>H<sub>56</sub>F<sub>6</sub>N<sub>5</sub>O<sub>7</sub>P [M–PF<sub>6</sub>]<sup>+</sup> *m/z* 934.4130, found 934.4141.

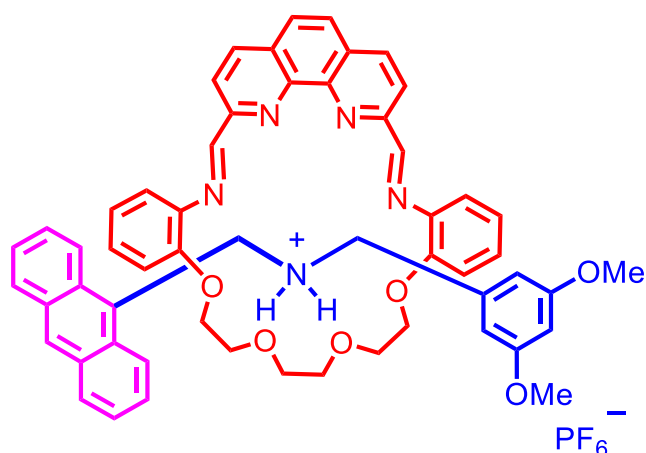

#### Synthesis of **9-H**·PF<sub>6</sub>:

A solution of thread **5-H**·PF<sub>6</sub> (50.3 mg, 0.1 mmol) in MeCN (15 mL) was added diamine **4** (33.2 mg, 0.1 mmol) and dialdehyde **1** (23.6 mg, 0.1 mmol). The yellow mixture was stirred for overnight at room temperature. The solvents were evaporated under reduced pressure. The mixture was purified by neutral alumina column chromatography with (1/3, v/v) CH<sub>2</sub>Cl<sub>2</sub>/*n*-hexane, followed by CH<sub>2</sub>Cl<sub>2</sub> to afford **9-H**·PF<sub>6</sub> as a pale-yellow powder (60.0 mg, 58%).

<sup>1</sup>H NMR spectrum (400 MHz, CD<sub>3</sub>CN) δ 10.97 (br, 2H), 8.66 (d, *J* = 8.1 Hz, 2H), 8.44 (s, 2H), 8.08 (d, *J* = 8.2 Hz, 2H), 7.69 (s, 2H), 7.64 (s, 1H), 7.52 – 7.41 (m, 4H), 7.29 – 7.24 (m, 2H), 7.22 – 7.06 (m, 6H), 6.81 (td, *J* = 7.5, 1.2 Hz, 2H), 6.42 (dd, *J* = 7.6, 1.6 Hz, 2H), 6.39 (d, *J* = 2.2 Hz, 2H), 5.95 (t, *J* = 2.2 Hz, 1H), 5.92 – 5.82 (m, 2H), 5.00 – 4.91 (m, 2H), 4.65 (t, *J* = 9.7 Hz, 2H), 4.33 (dd, *J* = 11.2, 2.6 Hz, 2H), 4.21 – 4.11 (m, 2H), 3.82 (d, *J* = 2.4 Hz, 1H), 3.80 – 3.72 (m, 3H), 3.46 – 3.35 (m, 2H), 3.17 (s, 6H).

<sup>13</sup>C NMR spectrum (101 MHz, CD<sub>3</sub>CN) δ 162.99, 161.01, 152.66, 152.35, 145.14, 142.42, 138.66, 137.28, 131.83, 130.78, 130.59, 130.00, 129.05, 128.95, 128.41, 127.25, 126.19, 125.71, 124.61, 122.26, 121.47, 112.63, 104.32, 100.23, 71.79, 70.60, 69.13, 60.96, 55.49, 52.65, 44.58.

HRMS (ESI): calcd. for C<sub>56</sub>H<sub>52</sub>F<sub>6</sub>N<sub>5</sub>O<sub>6</sub>P [M–PF<sub>6</sub>]<sup>+</sup> *m/z* 890.3918, found 890.3907.

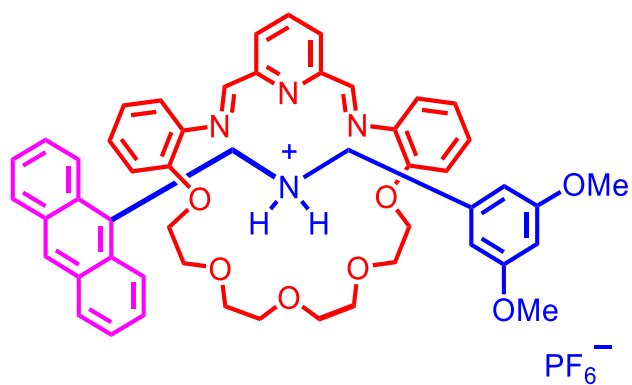

Synthesis of **10-H**· $\text{PF}_6$ :

The synthesis of **10-H**· $\text{PF}_6$  was reported in the literature [3].

$^1\text{H}$  NMR spectrum (400 MHz,  $\text{CD}_3\text{CN}$ ) of **10-H**· $\text{PF}_6$ .  $\delta$  9.91 (br, 2H), 8.55 (dd,  $J = 8.9$ , 1.0 Hz, 2H), 8.35 (s, 1H), 7.92 (s, 2H), 7.80 (d,  $J = 8.4$  Hz, 2H), 7.71 (t,  $J = 7.7$  Hz, 1H), 7.34 – 7.21 (m, 4H), 7.19 – 7.11 (m, 2H), 7.08 – 6.98 (m, 4H), 6.83 (td,  $J = 7.6$ , 1.2 Hz, 2H), 6.52 (d,  $J = 2.3$  Hz, 2H), 6.48 (dd,  $J = 7.8$ , 1.6 Hz, 2H), 6.11 (t,  $J = 2.3$  Hz, 1H), 5.82 (t,  $J = 6.6$  Hz, 2H), 5.13 (t,  $J = 6.8$  Hz, 2H), 4.35 – 4.25 (m, 4H), 4.15 – 3.99 (m, 2H), 3.87 – 3.57 (m, 10H), 3.32 (s, 6H).

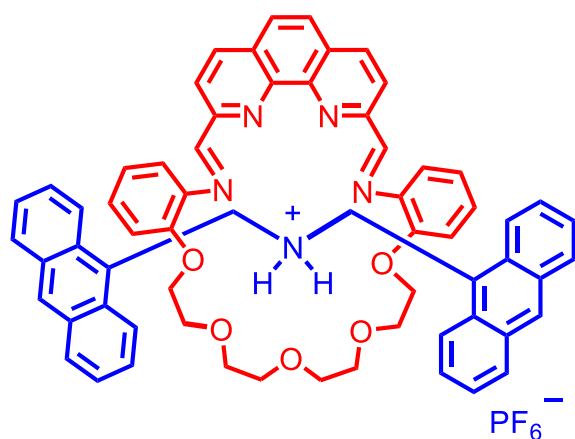

#### Synthesis of **11**-H·PF<sub>6</sub>:

A solution of thread **6**-H·PF<sub>6</sub> (54.3 mg, 0.1 mmol) in MeCN (15 mL) was added diamine **3** (37.6 mg, 0.1 mmol) and dialdehyde **1** (23.6 mg, 0.1 mmol). The yellow mixture was stirred for overnight at room temperature. The solvents were evaporated under reduced pressure. The mixture was purified by neutral aluminum oxide column chromatography with (1/3, v/v) CH<sub>2</sub>Cl<sub>2</sub>/*n*-hexane, followed by CH<sub>2</sub>Cl<sub>2</sub> to afford **11**-H·PF<sub>6</sub> as a pale-yellow powder (20.0 mg, 18%).

<sup>1</sup>H NMR (400 MHz, CD<sub>3</sub>CN) δ 10.77 (br, 2H), 8.67 (d, *J* = 8.7 Hz, 4H), 8.34 (s, 2H), 8.06 (d, *J* = 8.2 Hz, 2H), 7.87 (s, 2H), 7.72 (s, 2H), 7.66 – 7.61 (m, 4H), 7.45 (d, *J* = 8.2 Hz, 2H), 7.32 – 7.19 (m, 8H), 6.99 – 6.93 (m, 2H), 6.61 (td, *J* = 7.6, 1.1 Hz, 2H), 6.51 (dd, *J* = 8.4, 1.0 Hz, 2H), 6.17 (t, *J* = 5.7 Hz, 4H), 6.10 (dd, *J* = 7.6, 1.7 Hz, 2H), 3.94 – 3.87 (m, 4H), 3.87 – 3.82 (m, 4H), 3.38 – 3.33 (m, 4H), 3.31 (m, 4H).

<sup>13</sup>C NMR (101 MHz, CD<sub>3</sub>CN) δ 163.80, 152.56, 151.34, 145.28, 141.18, 138.59, 131.80, 131.29, 130.97, 130.63, 129.78, 128.54, 128.22, 127.74, 126.85, 125.83, 125.76, 124.79, 121.90, 112.47, 71.79, 71.73, 71.14, 68.84, 48.64.

HRMS (ESI): calcd. for C<sub>64</sub>H<sub>56</sub>F<sub>6</sub>N<sub>5</sub>O<sub>5</sub>P [M–PF<sub>6</sub>]<sup>+</sup> *m/z* 974.4281, found 974.4239.



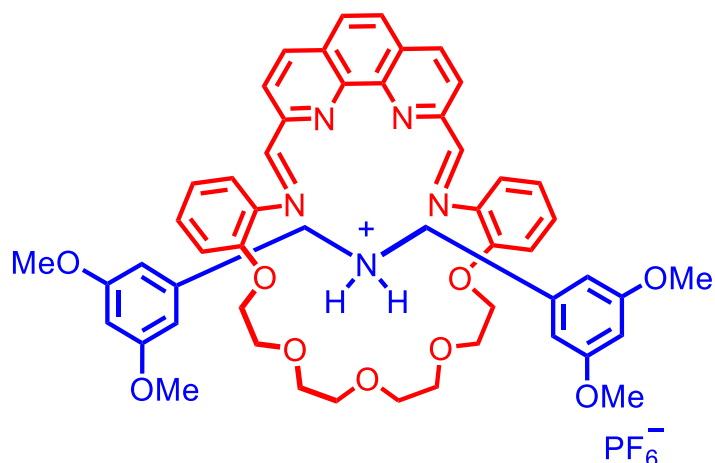

#### Synthesis of **12**-H·PF<sub>6</sub>:

A solution of thread **7**-H·PF<sub>6</sub> (46.3 mg, 0.1 mmol) in MeCN (15 mL) was added diamine **3** (37.6 mg, 0.1 mmol) and dialdehyde **1** (23.6 mg, 0.1 mmol). The yellow mixture was stirred for overnight at room temperature. The solvents were evaporated under reduced pressure. The mixture was purified by neutral aluminum oxide column chromatography with (1/3, v/v) CH<sub>2</sub>Cl<sub>2</sub>/*n*-hexane, followed by CH<sub>2</sub>Cl<sub>2</sub> to afford **12**-H·PF<sub>6</sub> as a pale-yellow powder (63.0 mg, 61%).

<sup>1</sup>H NMR (400 MHz, CD<sub>3</sub>CN) δ 10.84 (br, 2H), 8.68 (s, 2H), 8.58 (d, *J* = 8.2 Hz, 2H), 8.10 (d, *J* = 8.2 Hz, 2H), 8.01 (s, 2H), 7.26 – 7.17 (m, 2H), 7.12 (dd, *J* = 8.4, 1.2 Hz, 2H), 6.77 (td, *J* = 7.6, 1.2 Hz, 2H), 6.34 (dd, *J* = 7.7, 1.6 Hz, 2H), 6.17 (d, *J* = 2.3 Hz, 4H), 5.75 (t, *J* = 2.2 Hz, 2H), 4.38 – 4.25 (m, 8H), 3.86 – 3.76 (m, 4H), 3.38 – 3.27 (m, 4H), 3.20 (s, 12H), 3.10 – 3.03 (m, 4H).

<sup>13</sup>C NMR (101 MHz, CD<sub>3</sub>CN) δ 163.37, 160.62, 152.46, 151.99, 146.51, 142.25, 139.14, 135.65, 131.48, 129.00, 128.62, 127.18, 122.19, 121.53, 113.58, 106.86, 100.09, 71.59, 71.02, 71.00, 69.73, 55.37, 52.87.

HRMS (ESI): calcd. for C<sub>52</sub>H<sub>56</sub>F<sub>6</sub>N<sub>5</sub>O<sub>9</sub>P [M–PF<sub>6</sub>]<sup>+</sup> *m/z* 894.4078, found 894.4038.

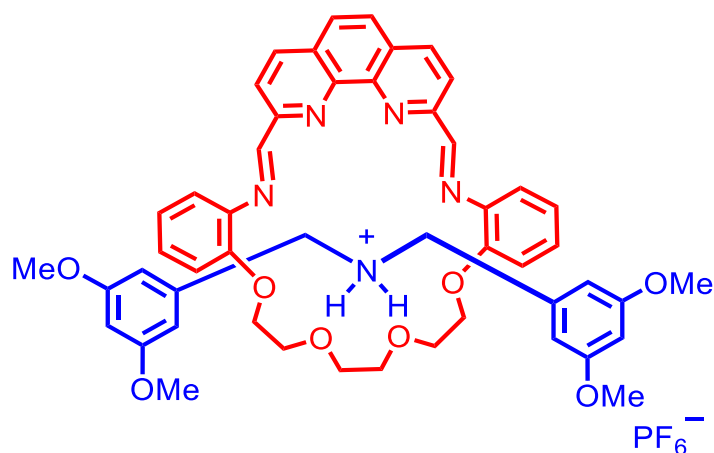

#### Synthesis of **13**-H·PF<sub>6</sub>:

A solution of thread **7**-H·PF<sub>6</sub> (46.3 mg, 0.1 mmol) in MeCN (15 mL) was added diamine **4** (33.2 mg, 0.1 mmol) and dialdehyde **1** (23.6 mg, 0.1 mmol). The yellow mixture was stirred for overnight at room temperature. The solvents were evaporated under reduced pressure. The mixture was purified by recrystallization in MeCN/Et<sub>2</sub>O solution. **13**-H·PF<sub>6</sub> as a pale-yellow powder was obtained (50.0 mg, 50%).

<sup>1</sup>H NMR (400 MHz, CD<sub>3</sub>CN) δ 10.93 (br, 2H), 8.69 (s, 2H), 8.57 (d, *J* = 8.2 Hz, 2H), 8.10 (d, *J* = 8.2 Hz, 2H), 8.00 (s, 2H), 7.32 – 7.23 (m, 2H), 7.14 (d, *J* = 7.7 Hz, 2H), 6.89 (td, *J* = 7.6, 1.0 Hz, 2H), 6.59 (dd, *J* = 7.6, 1.5 Hz, 2H), 6.18 (d, *J* = 2.2 Hz, 4H), 5.74 (t, *J* = 2.2 Hz, 2H), 4.61 – 4.48 (m, 4H), 4.37 – 4.26 (m, 4H), 3.84 – 3.77 (m, 4H), 3.44 (s, 4H), 3.19 (s, 12H).

<sup>13</sup>C NMR (101 MHz, CD<sub>3</sub>CN) δ 163.52, 160.84, 152.55, 146.60, 142.41, 139.29, 136.29, 131.68, 129.15, 127.79, 122.37, 121.63, 113.27, 107.08, 100.16, 71.45, 70.64, 69.54, 55.43, 52.57.

HRMS (ESI): calcd. for C<sub>50</sub>H<sub>52</sub>F<sub>6</sub>N<sub>5</sub>O<sub>8</sub>P [M–PF<sub>6</sub>]<sup>+</sup> *m/z* 850.3816, found 850.3779.

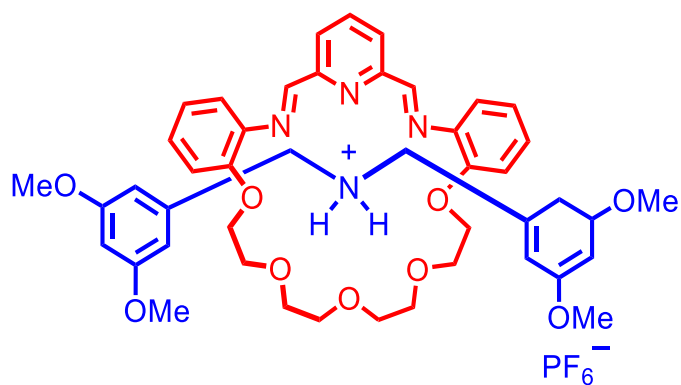

Synthesis of **14-H**·PF<sub>6</sub>:

The synthesis of **14-H**·PF<sub>6</sub> was reported in the literature [5].

**Table S1.** NMR chemical shift value ( $\delta$  in ppm) of the benzylic protons of the threads and the rotaxanes<sup>a</sup>

| Compounds                             | chemical shift value of benzylic protons (anthracene) | chemical shift value of benzylic protons (3,5-dimethoxybenzyl) |
|---------------------------------------|-------------------------------------------------------|----------------------------------------------------------------|
| Thread <b>5-H</b> ·PF <sub>6</sub>    | 5.24                                                  | 4.41                                                           |
| Rotaxane <b>8-H</b> ·PF <sub>6</sub>  | 5.75 – 5.64                                           | 4.72 – 4.60                                                    |
| Rotaxane <b>9-H</b> ·PF <sub>6</sub>  | 5.92 – 5.82                                           | 5.00 – 4.91                                                    |
| Rotaxane <b>10-H</b> ·PF <sub>6</sub> | 5.87 – 5.79                                           | 5.16 – 5.09                                                    |
| Thread <b>6-H</b> ·PF <sub>6</sub>    | 5.25                                                  |                                                                |
| Rotaxane <b>11-H</b> ·PF <sub>6</sub> | 6.20 – 6.14                                           |                                                                |
| Thread <b>7-H</b> ·PF <sub>6</sub>    |                                                       | 4.12 <sup>[6]</sup>                                            |
| Rotaxane <b>12-H</b> ·PF <sub>6</sub> |                                                       | 4.32 – 4.28                                                    |
| Rotaxane <b>13-H</b> ·PF <sub>6</sub> |                                                       | 4.60 – 4.52                                                    |
| Rotaxane <b>14-H</b> ·PF <sub>6</sub> |                                                       | 4.62 – 4.53                                                    |

<sup>a</sup> Value obtained from <sup>1</sup>H NMR spectroscopy (400 MHz, CD<sub>3</sub>CN, 298 K)

## NMR spectra

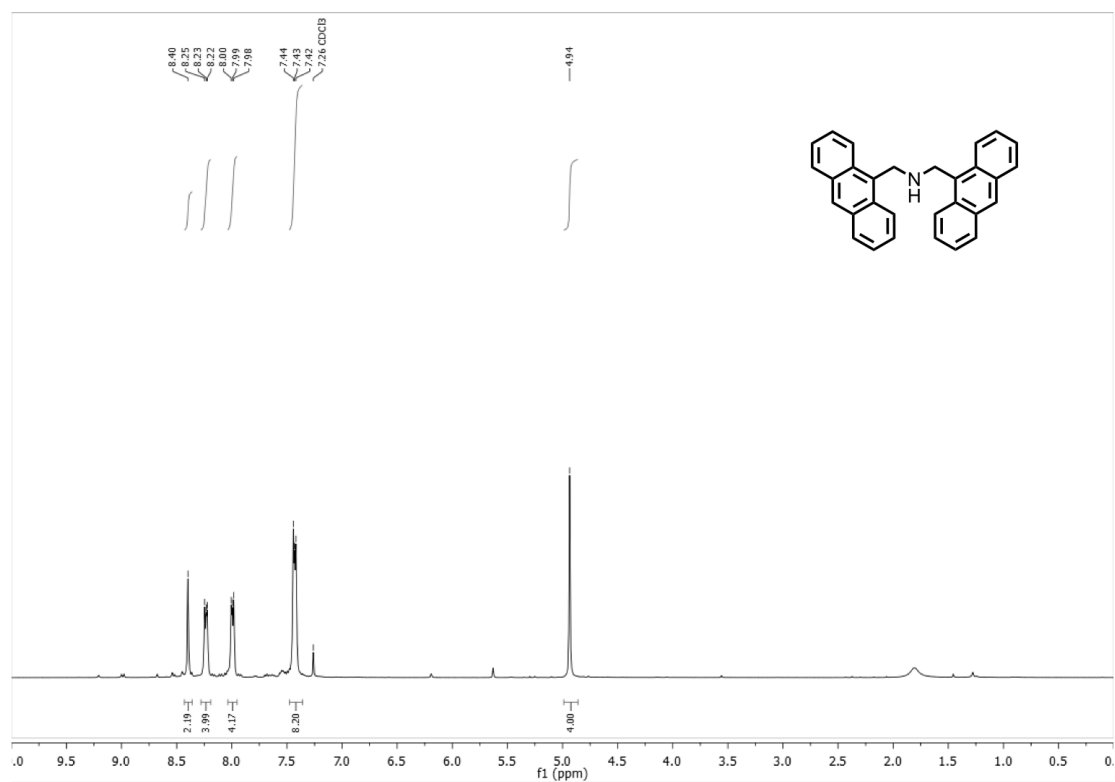

**Figure S1.** <sup>1</sup>H NMR spectrum (400 MHz, CDCl<sub>3</sub>) of 6.

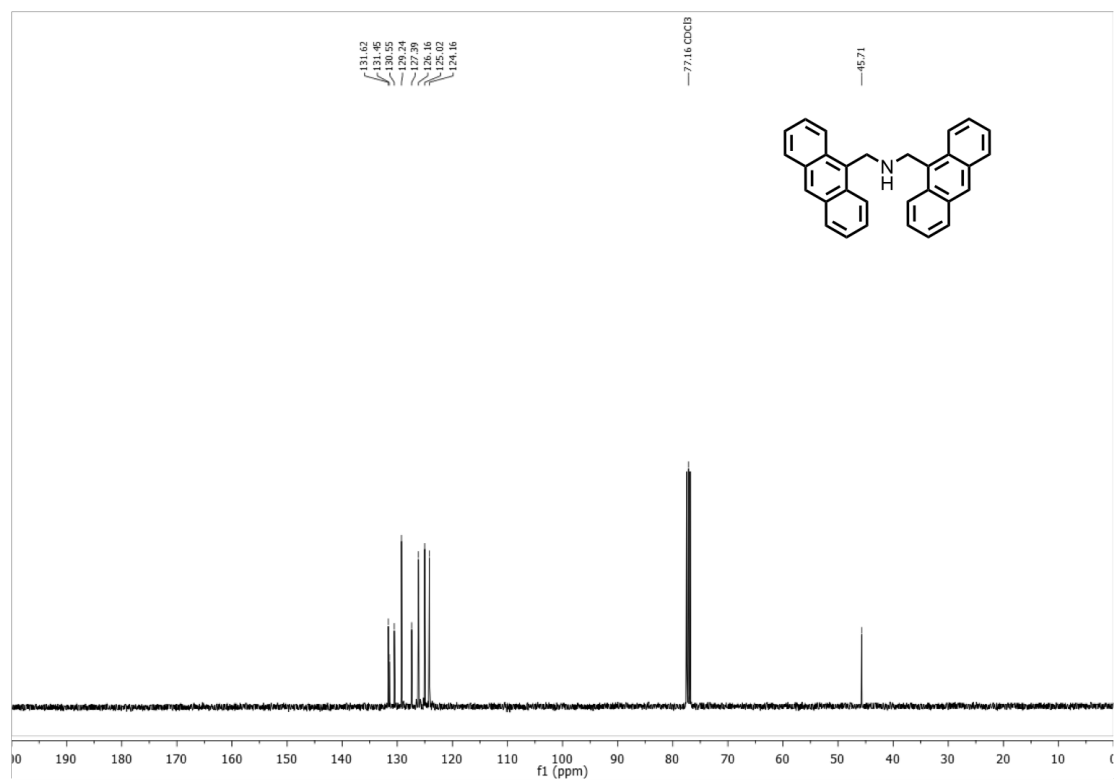

**Figure S2.** <sup>13</sup>C NMR spectrum (101 MHz, CDCl<sub>3</sub>) of 6.

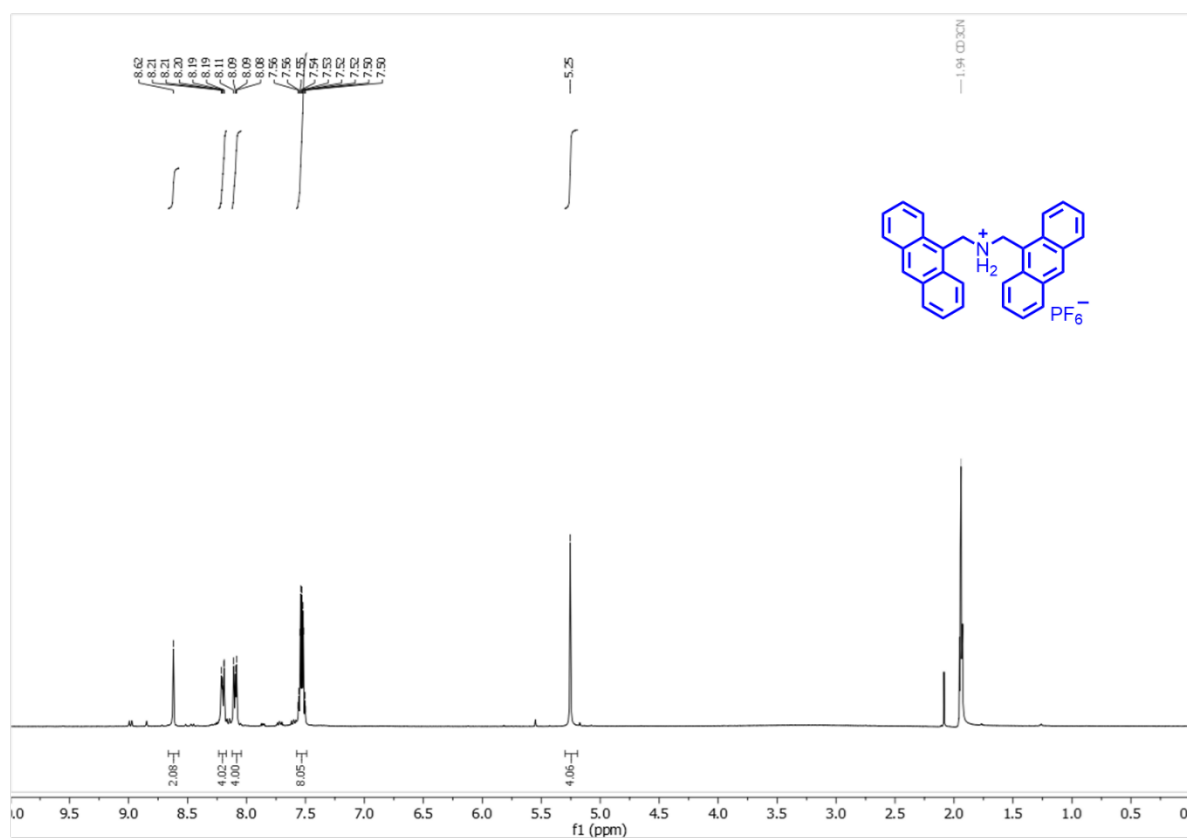

**Figure S3.** <sup>1</sup>H NMR spectrum (400 MHz, CD<sub>3</sub>CN) of 6-H·PF<sub>6</sub>.

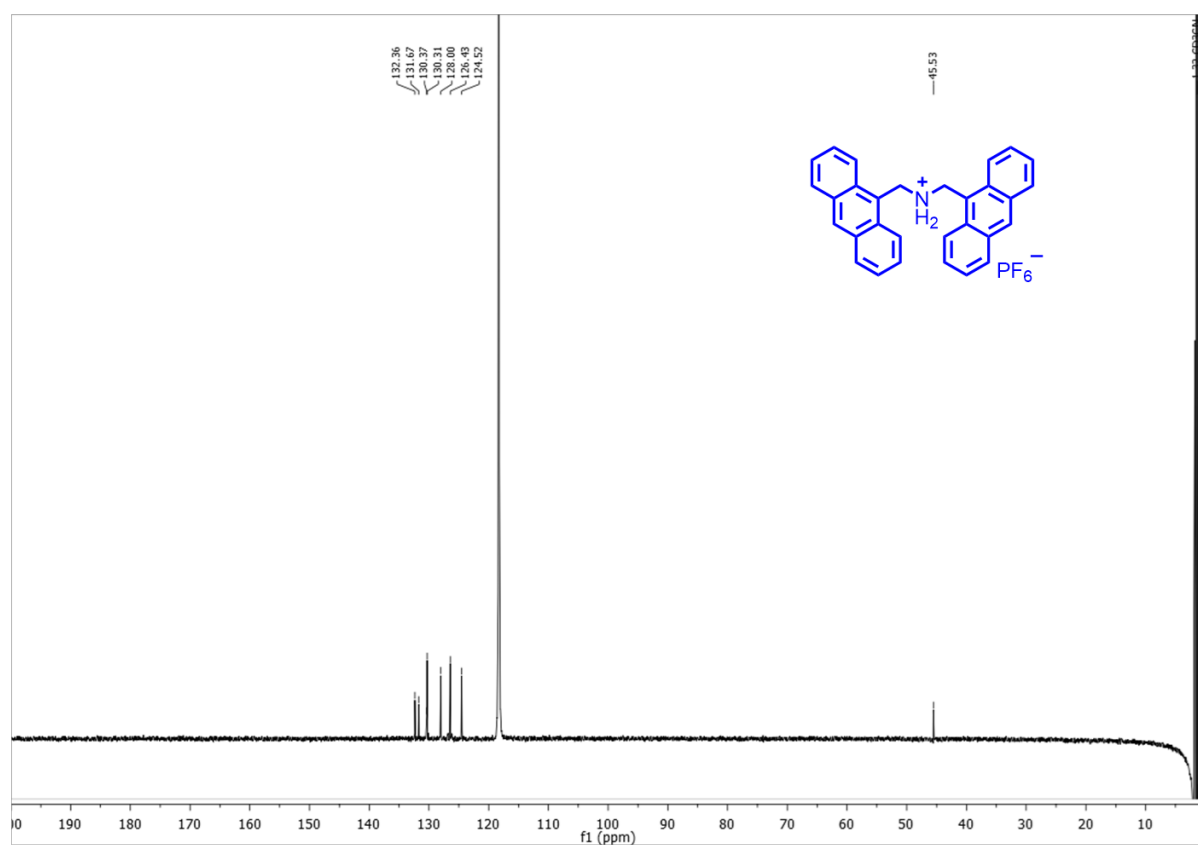

**Figure S4.** <sup>13</sup>C NMR spectrum (101 MHz, CD<sub>3</sub>CN) of 6-H·PF<sub>6</sub>.

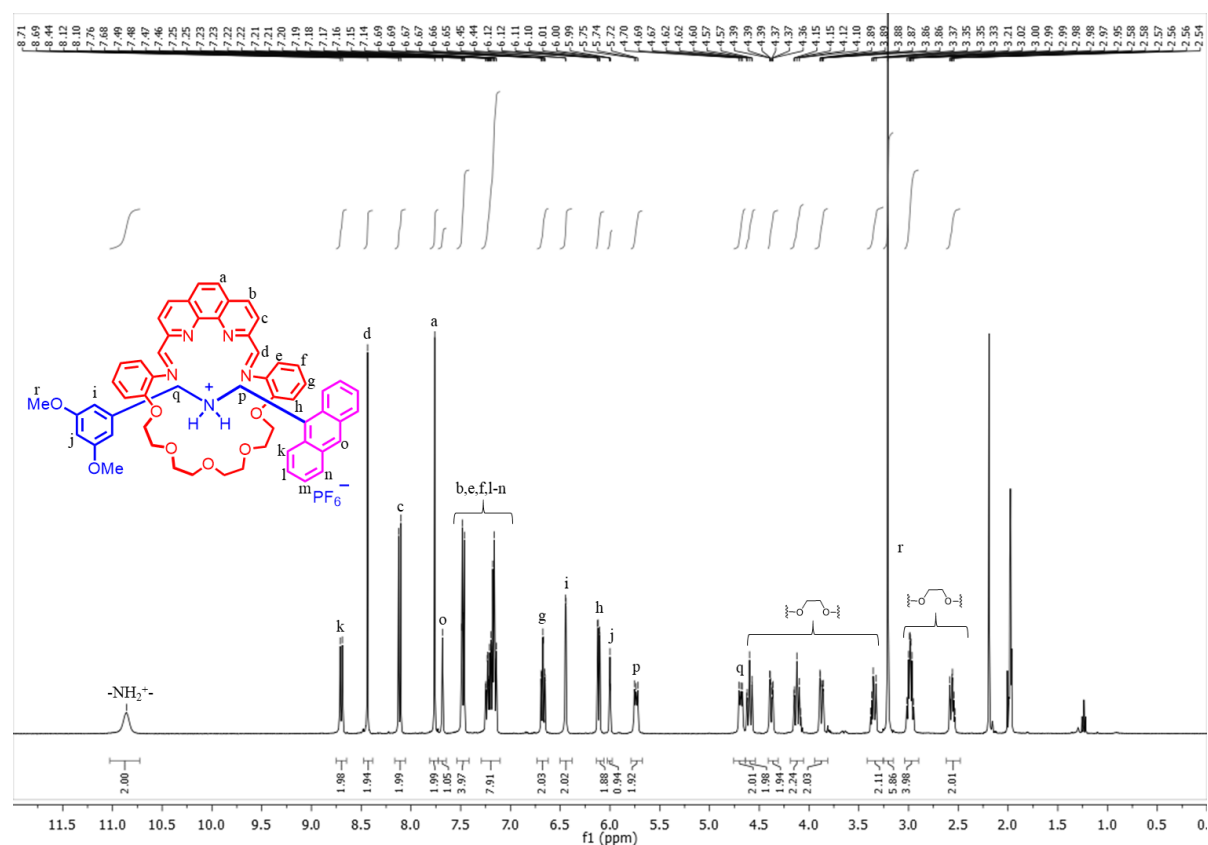

**Figure S5.**  $^1\text{H}$  NMR spectrum (400 MHz,  $\text{CD}_3\text{CN}$ ) of **8-H**· $\text{PF}_6$ .

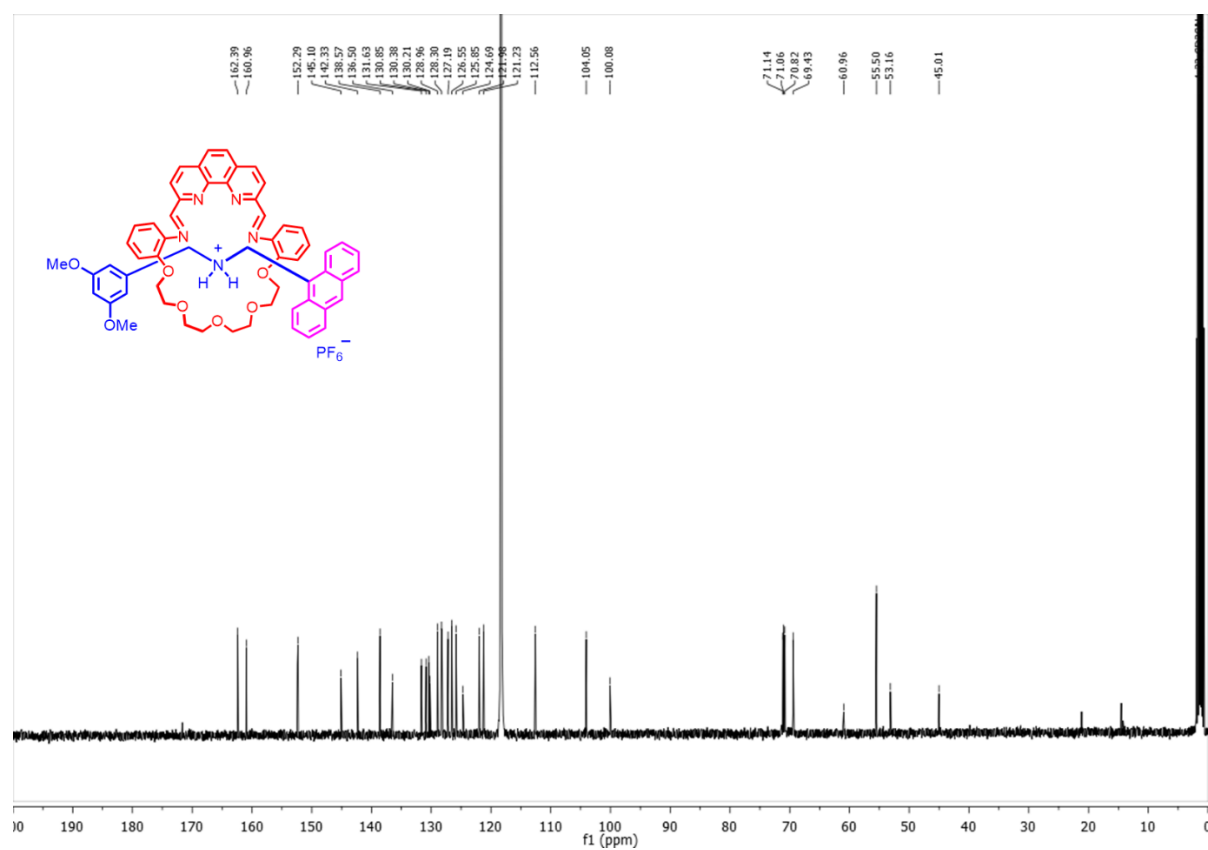

**Figure S6.**  $^{13}\text{C}$  NMR spectrum (101 MHz,  $\text{CD}_3\text{CN}$ ) of **8-H**· $\text{PF}_6$ .

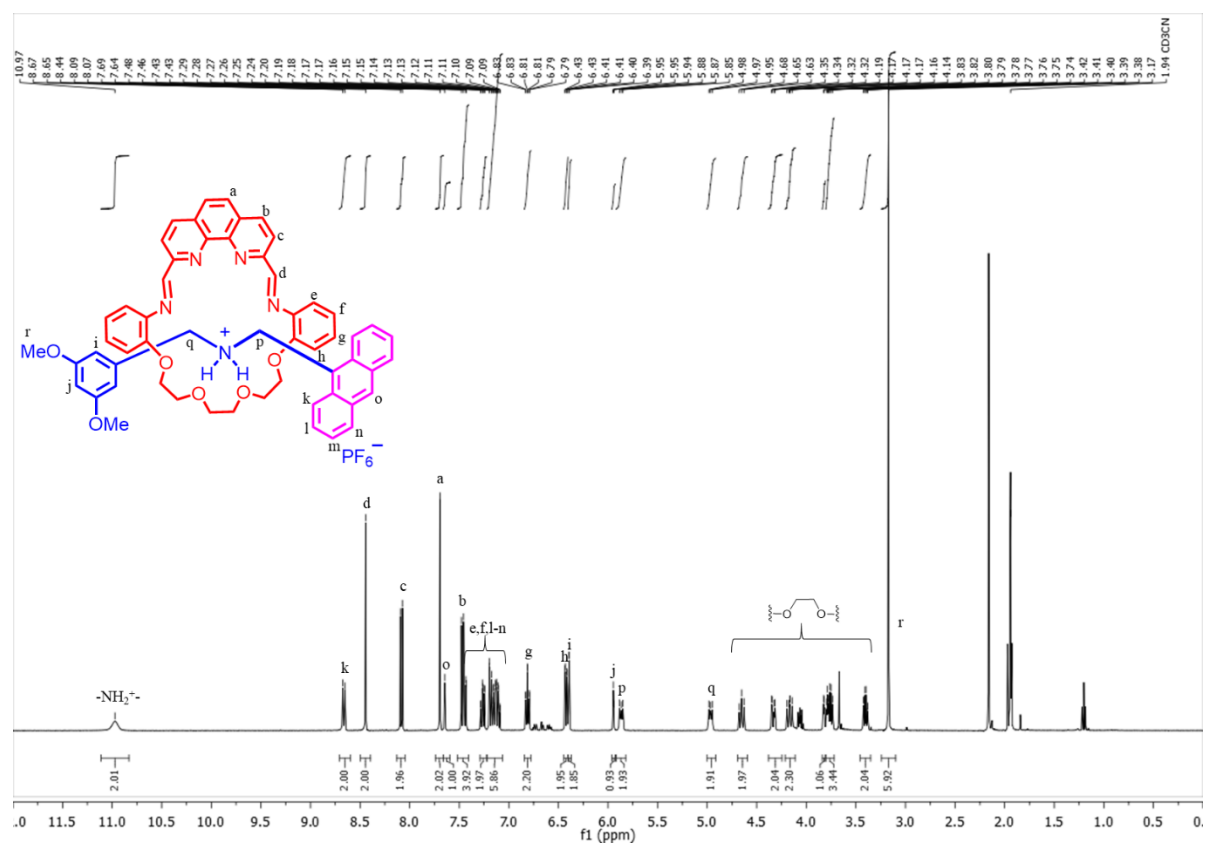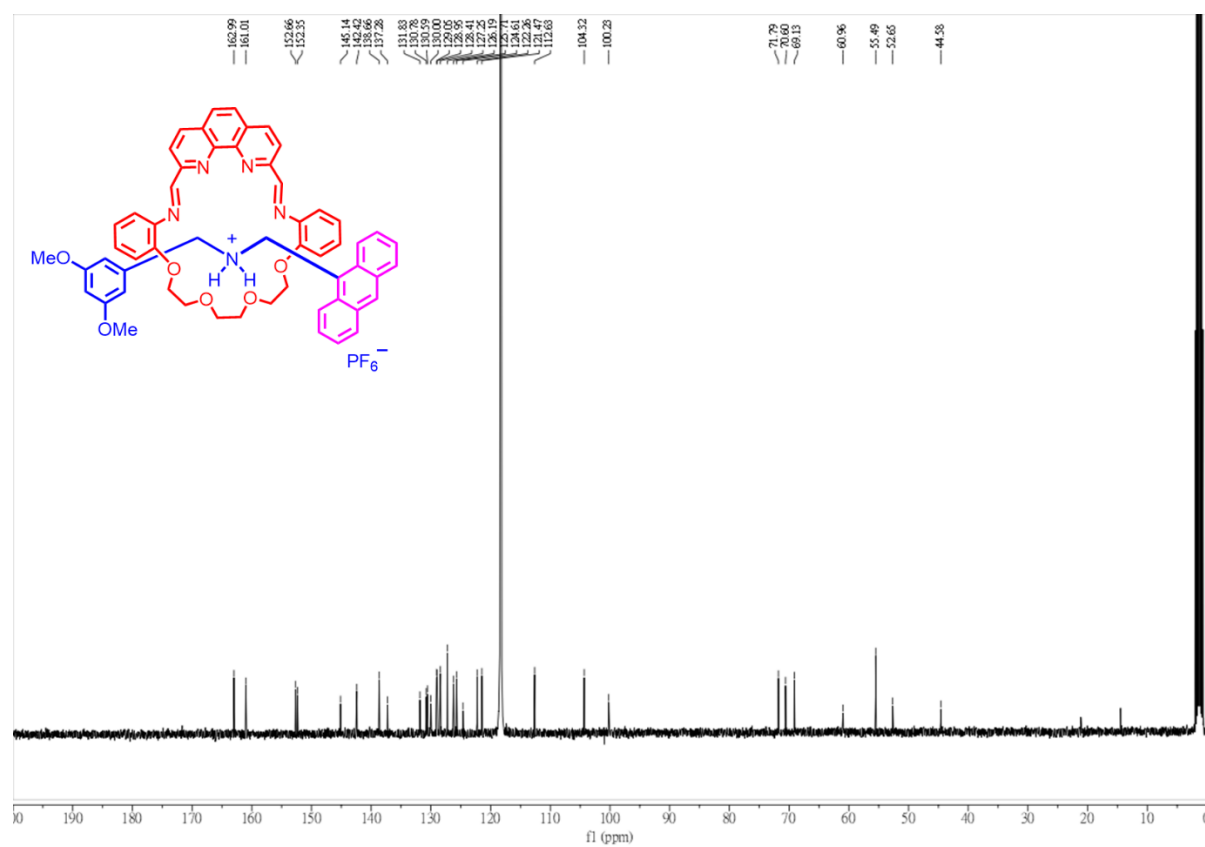

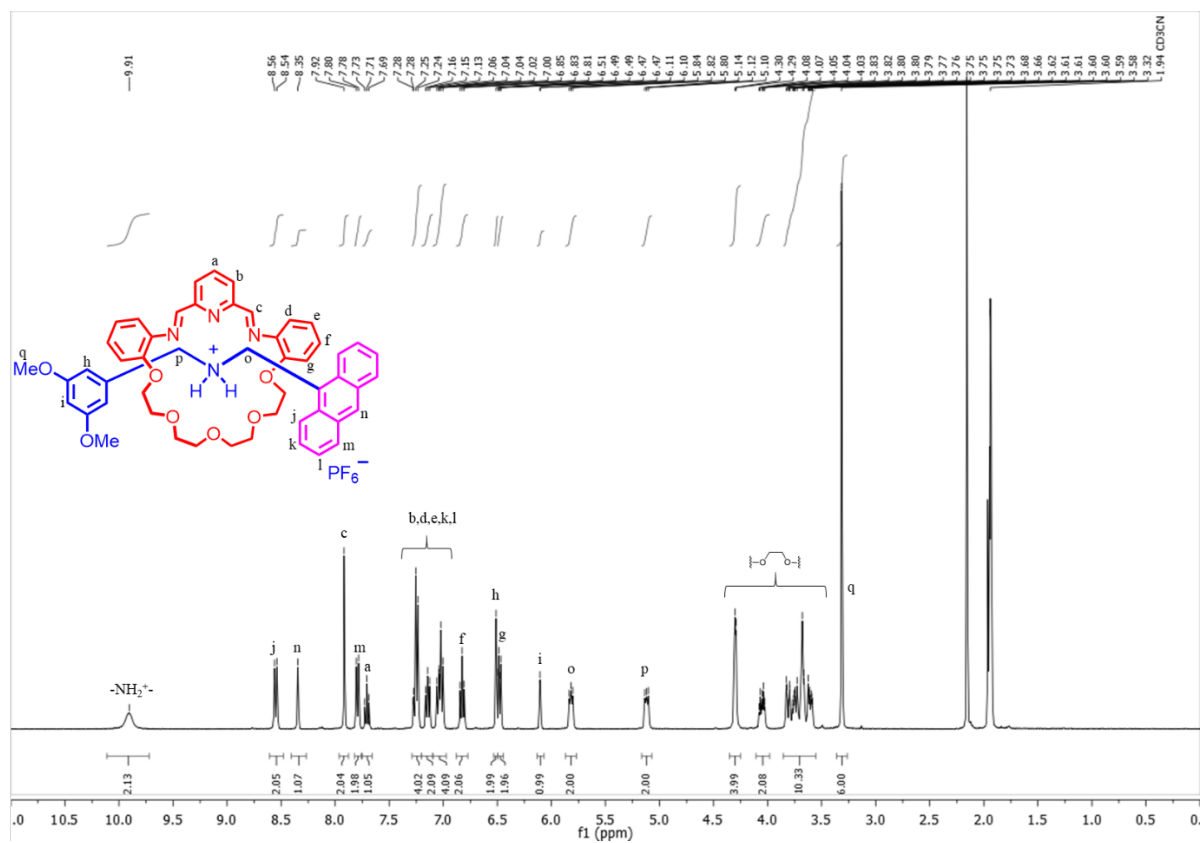

**Figure S9.** <sup>1</sup>H NMR spectrum (400 MHz, CD<sub>3</sub>CN) of 10-H·PF<sub>6</sub>.

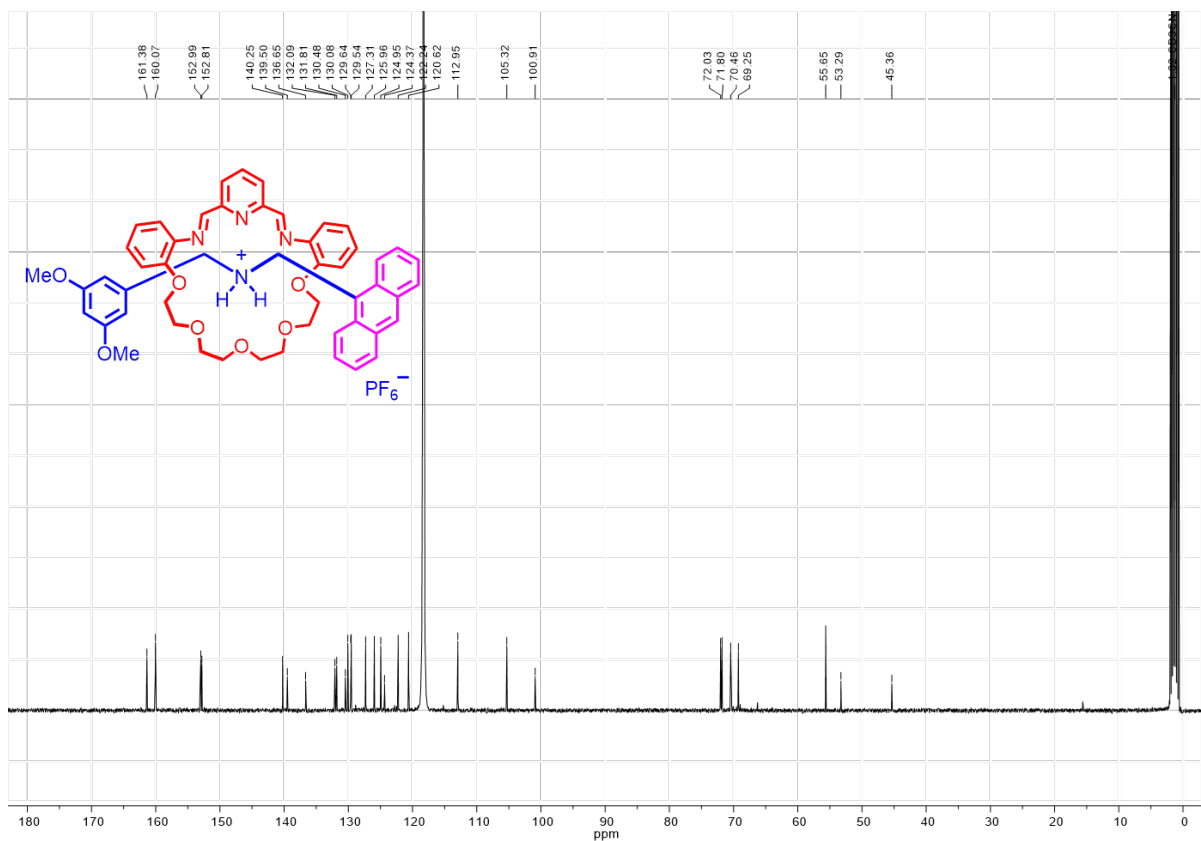

**Figure S10.** <sup>13</sup>C NMR spectrum (101 MHz, CD<sub>3</sub>CN) of 10-H·PF<sub>6</sub>.



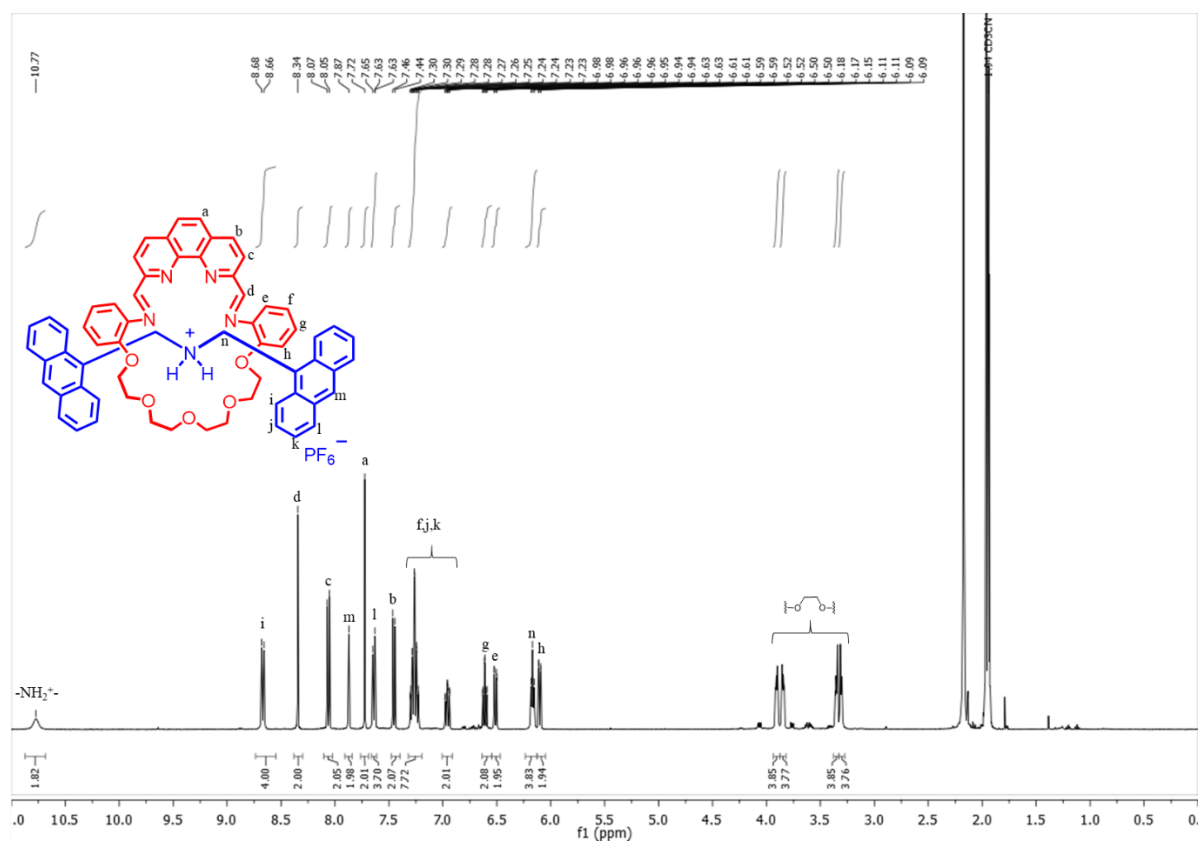

**Figure S11.**  $^1\text{H}$  NMR spectrum (400 MHz,  $\text{CD}_3\text{CN}$ ) of **11-H**· $\text{PF}_6$ .

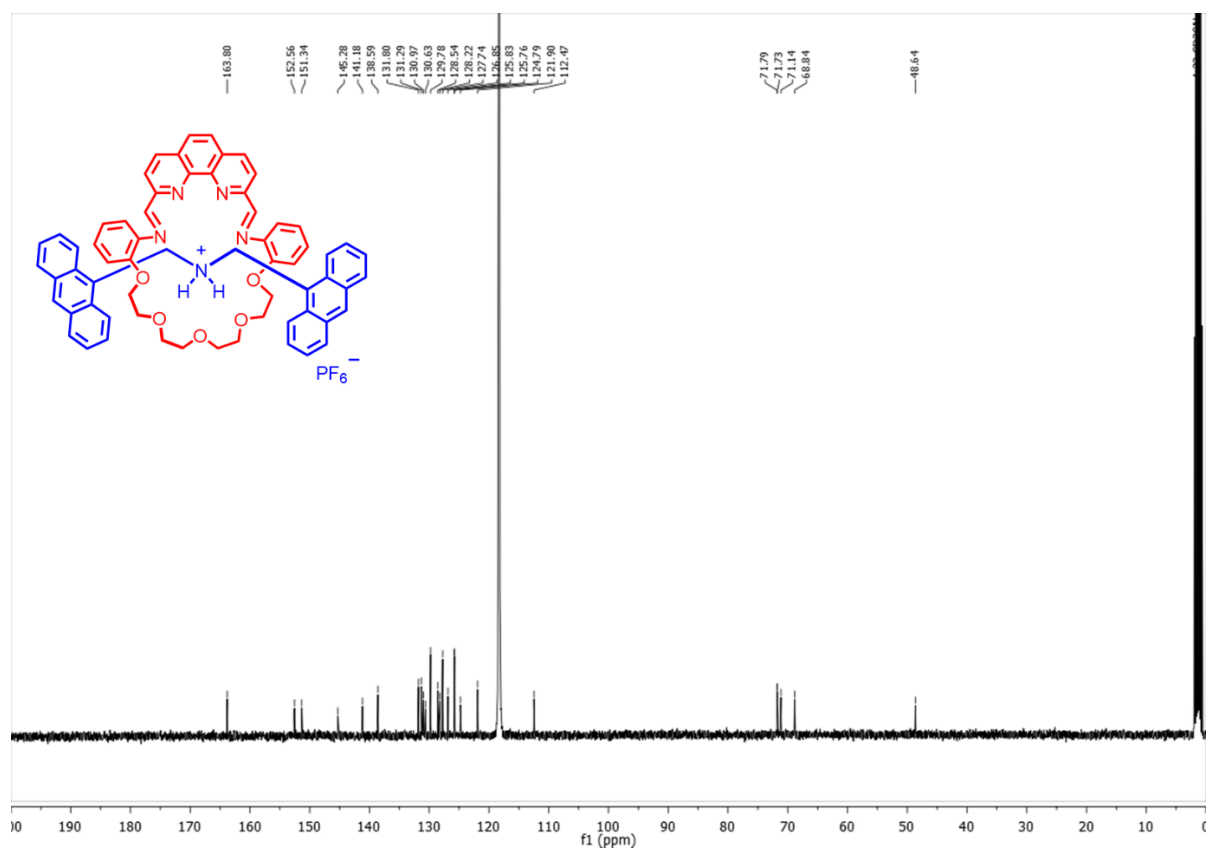

**Figure S12.**  $^{13}\text{C}$  NMR spectrum (101 MHz,  $\text{CD}_3\text{CN}$ ) of **11-H**· $\text{PF}_6$ .

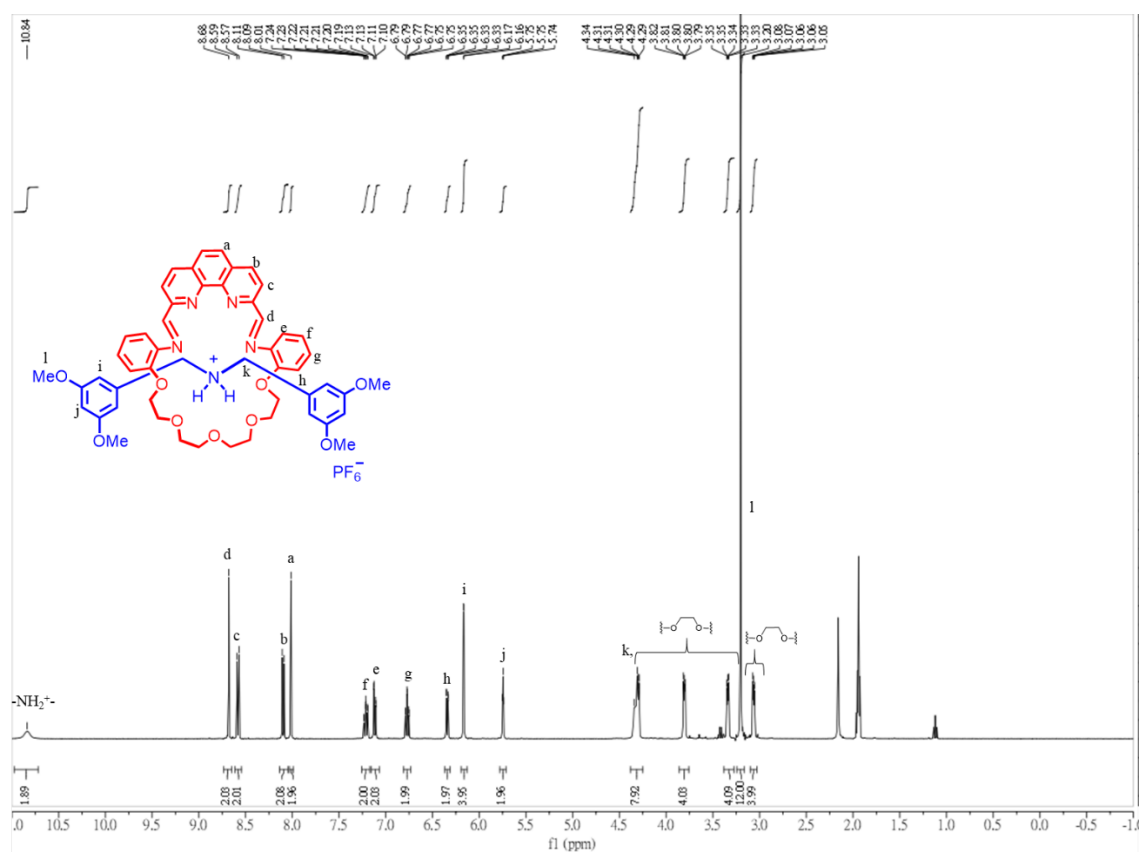

**Figure S13.**  $^1\text{H}$  NMR spectrum (400 MHz,  $\text{CD}_3\text{CN}$ ) of **12-H**· $\text{PF}_6$ .

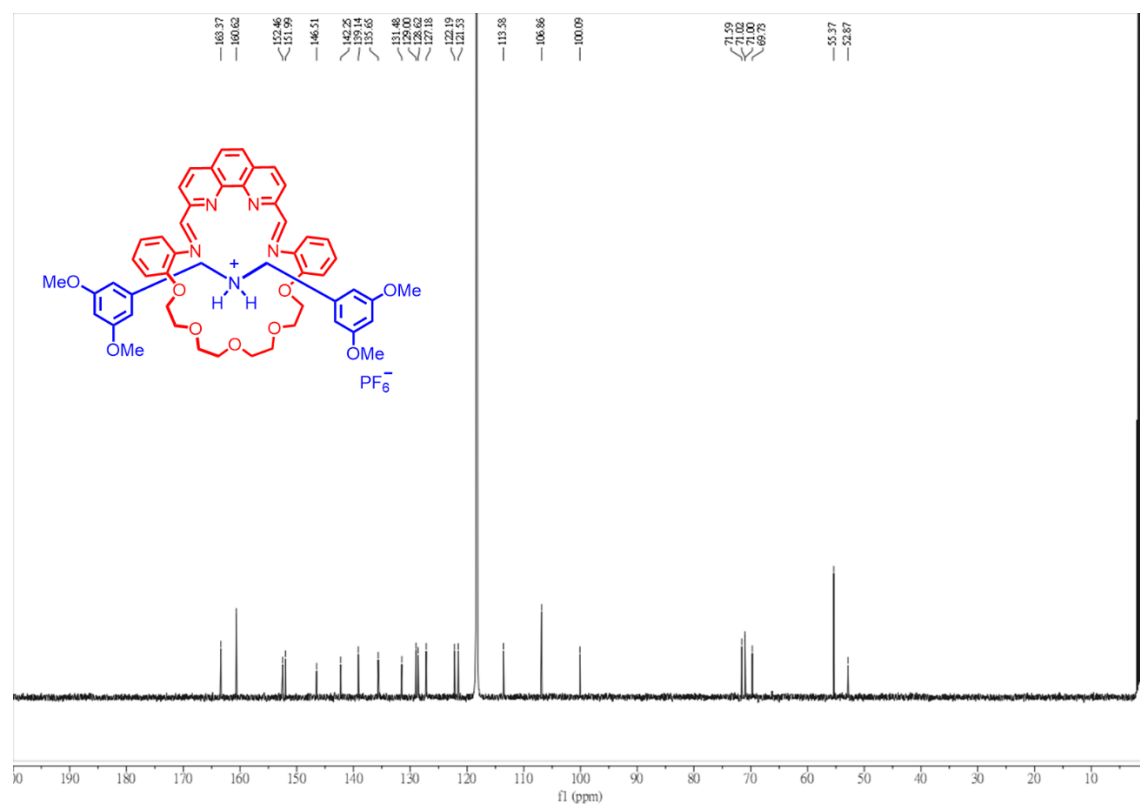

**Figure S14.**  $^{13}\text{C}$  NMR spectrum (101 MHz,  $\text{CD}_3\text{CN}$ ) of **12-H**· $\text{PF}_6$ .

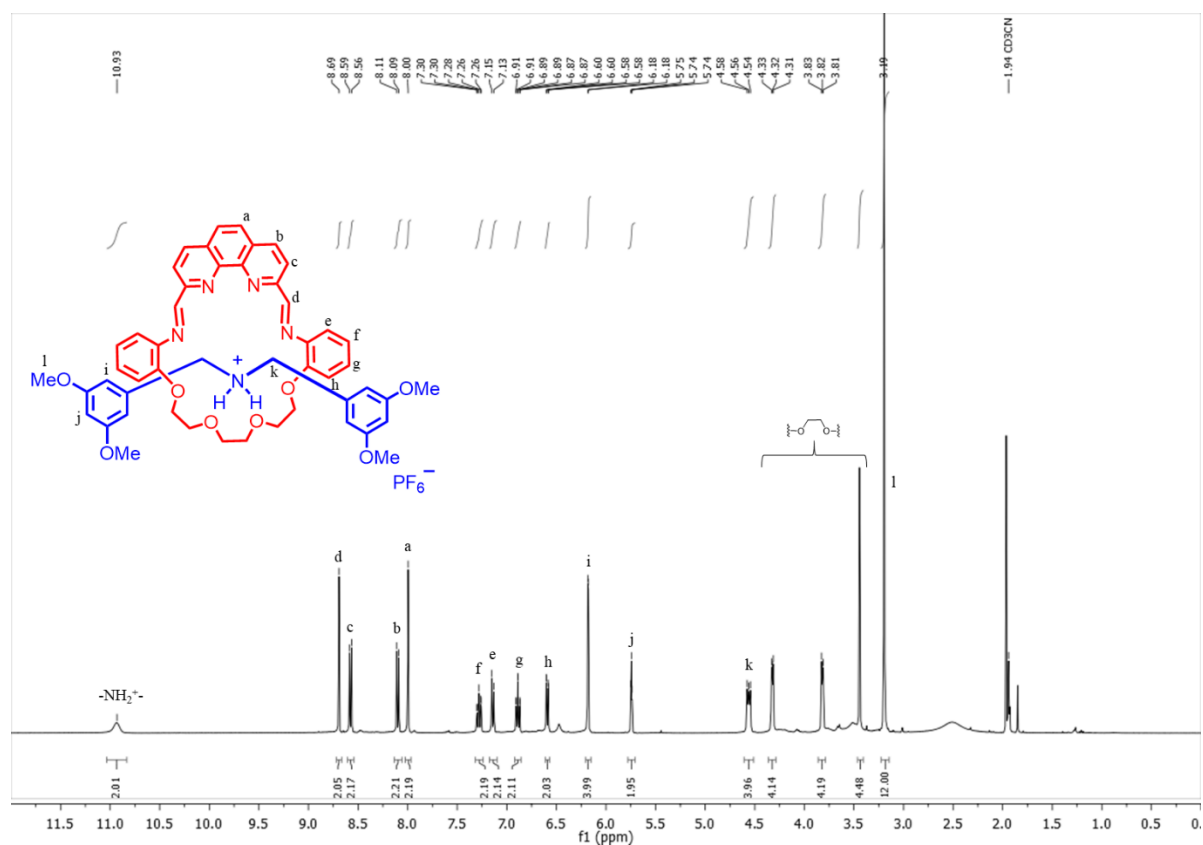

**Figure S15.**  $^1\text{H}$  NMR spectrum (400 MHz,  $\text{CD}_3\text{CN}$ ) of **13-H**· $\text{PF}_6$ .

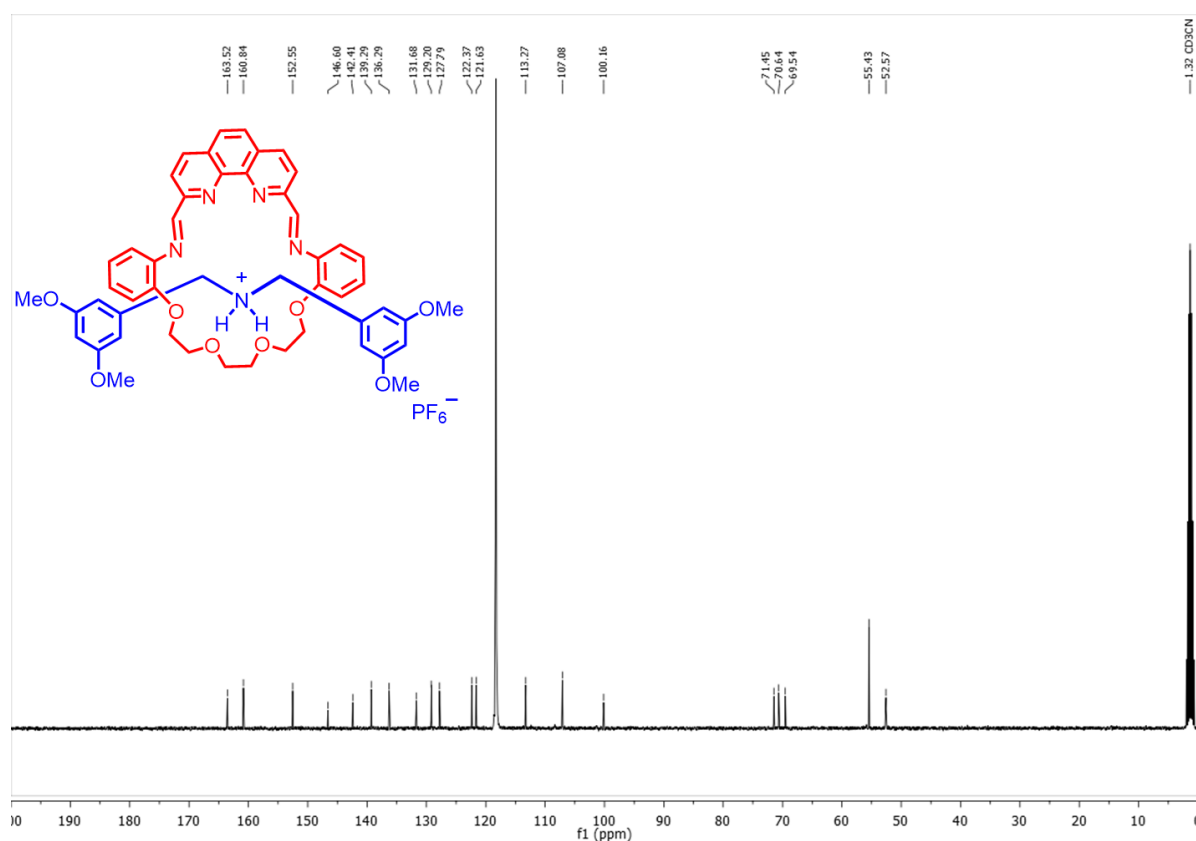

**Figure S16.**  $^{13}\text{C}$  NMR spectrum (101 MHz,  $\text{CD}_3\text{CN}$ ) of **13-H**· $\text{PF}_6$ .

## Stacked $^1\text{H}$ NMR spectra for the DCL experiments

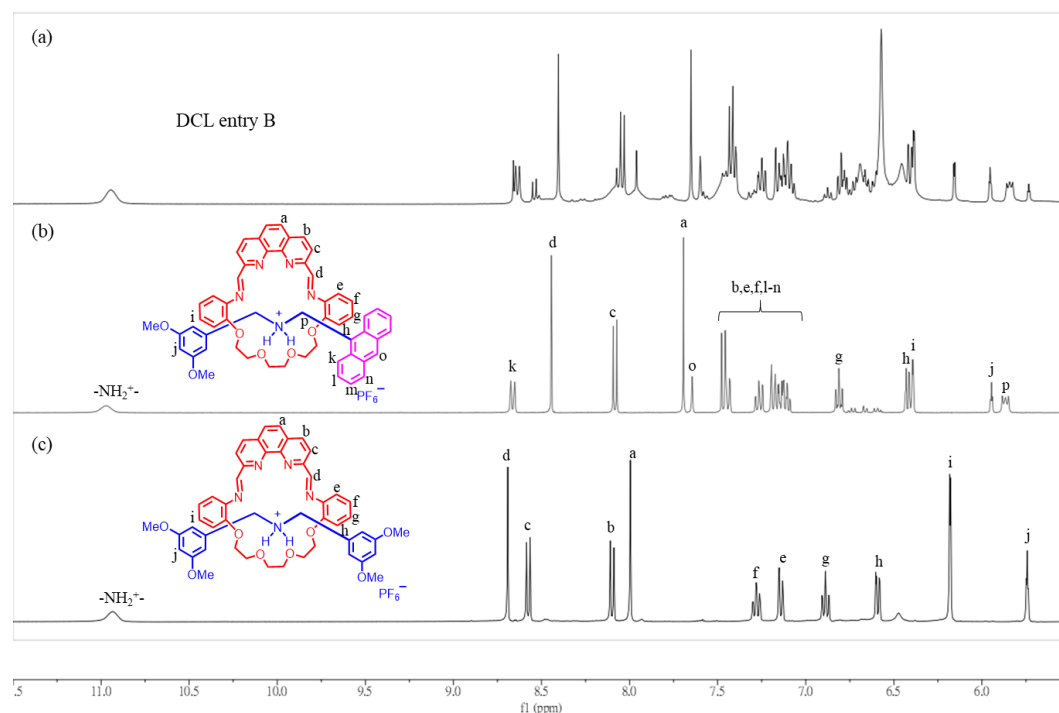

**Figure S17.** Partial Stacked  $^1\text{H}$  NMR spectra (CD<sub>3</sub>CN, 400 MHz) of (a) crude product mixture of DCL entry B after 18 h reaction, (b)  $9\text{-H}\cdot\text{PF}_6$ , (c)  $13\text{-H}\cdot\text{PF}_6$ .

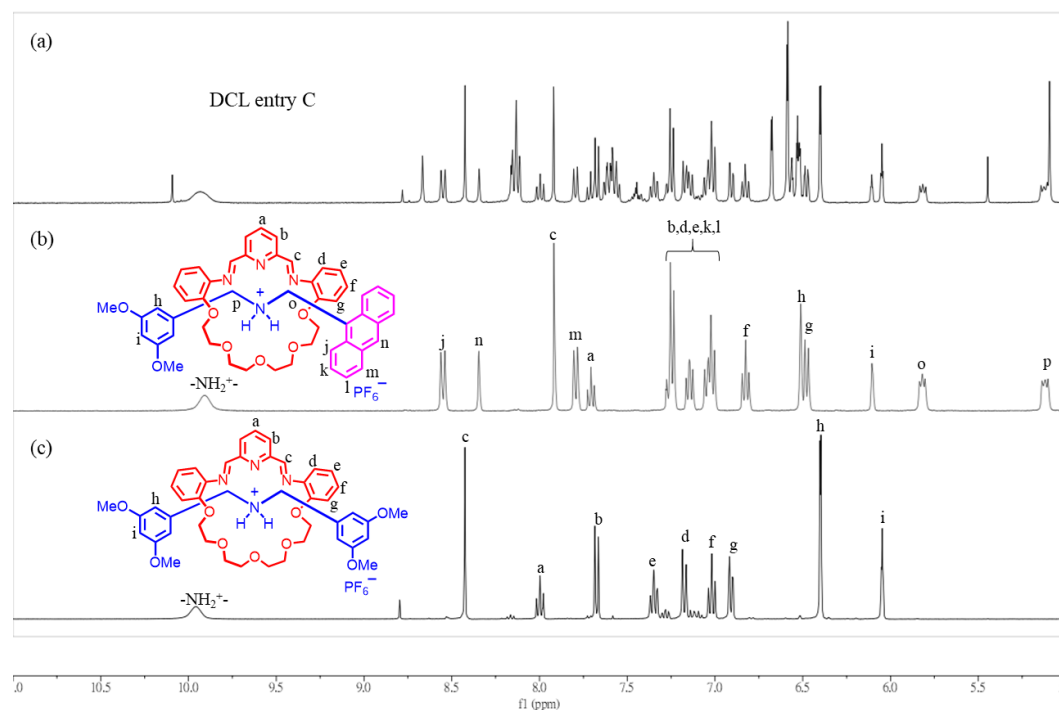

**Figure S18.** Partial Stacked  $^1\text{H}$  NMR spectra (CD<sub>3</sub>CN, 400 MHz) of (a) crude product mixture of DCL entry C after 18 h reaction, (b)  $10\text{-H}\cdot\text{PF}_6$ , (c)  $14\text{-H}\cdot\text{PF}_6$ .

## Mass spectra

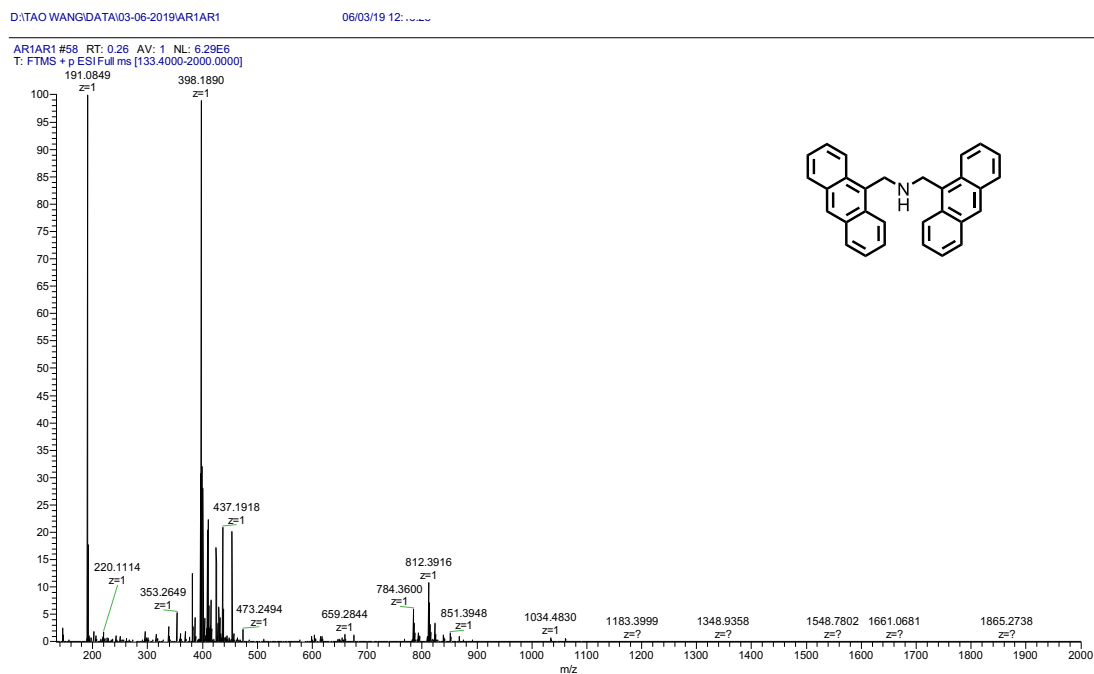

**Figure S19.** HRMS (ESI) of compound **6**.

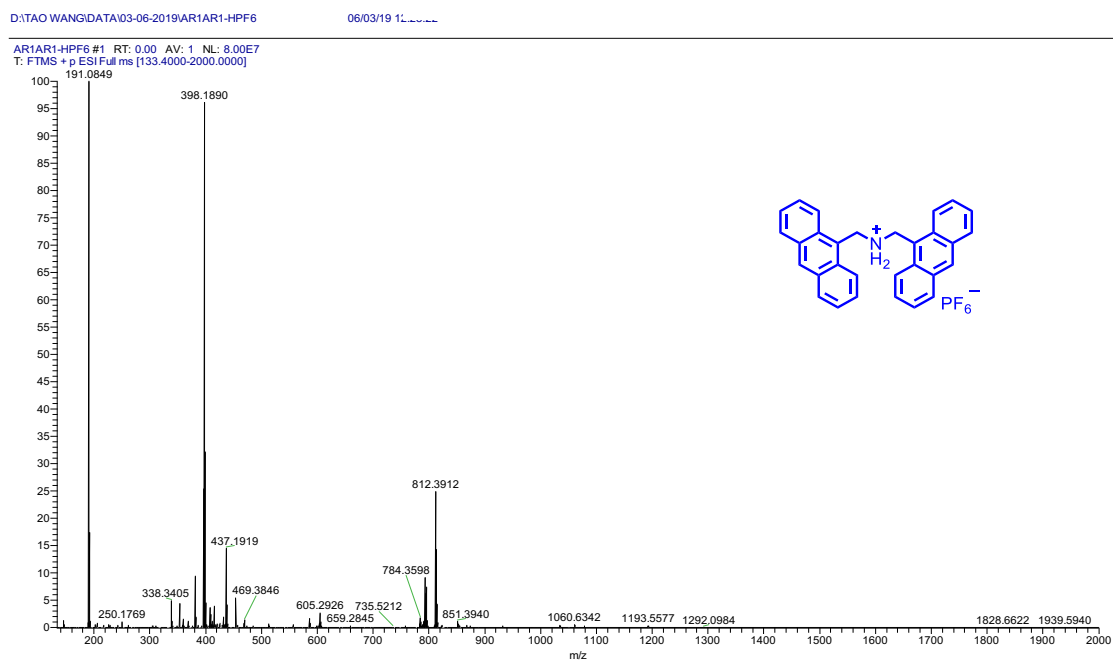

**Figure S20.** HRMS (ESI) of compound **6-H·PF<sub>6</sub>**.

PH5RHPF6 #21 RT: 0.09 AV: 1 NL: 3.77E7  
T: FTMS + p ESI Full ms [133.4000-2000.0000]

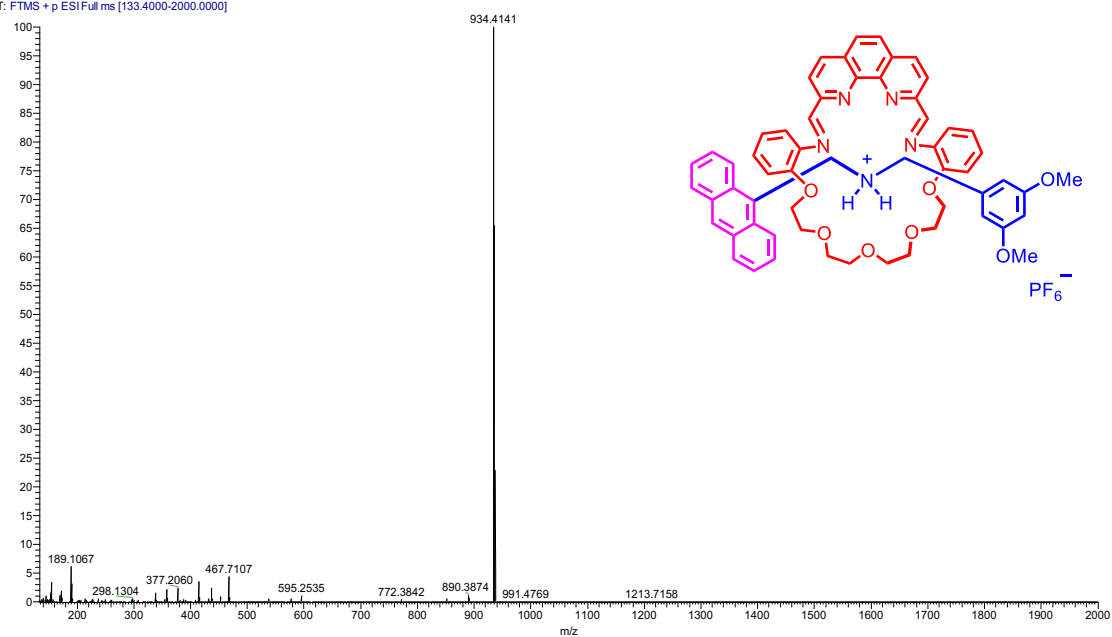

**Figure S21.** HRMS (ESI) of 8-H·PF<sub>6</sub>.

NR-HPF6 #69 RT: 0.31 AV: 1 NL: 1.94E7  
T: FTMS + p ESI Full ms [133.4000-2000.0000]

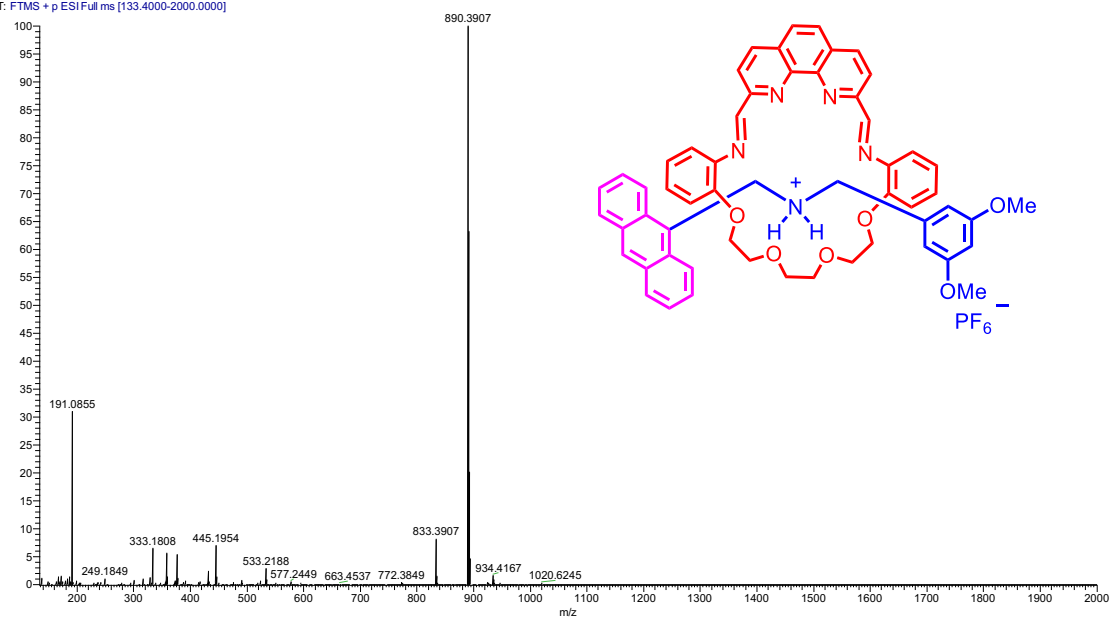

**Figure S22.** HRMS (ESI) of 9-H·PF<sub>6</sub>.

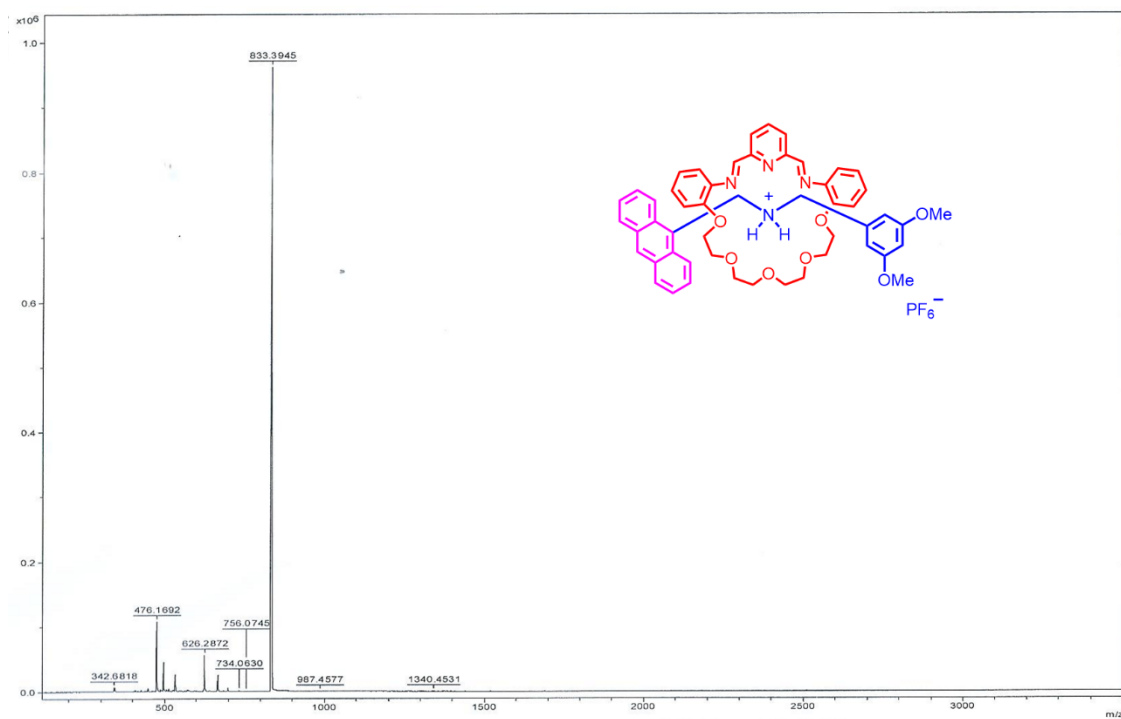

**Figure S23.** HRMS (MALDI-TOF) of 10-H·PF<sub>6</sub>.

D:\TAO WANG\PH5RHPF6-S-DIAN

03/25/19 16:00

PH5RHPF6-S-DIAN #27 RT: 0.12 AV: 1 NL: 1.69E6  
T: FTMS + p ESI Full ms [133.4000-2000.0000]

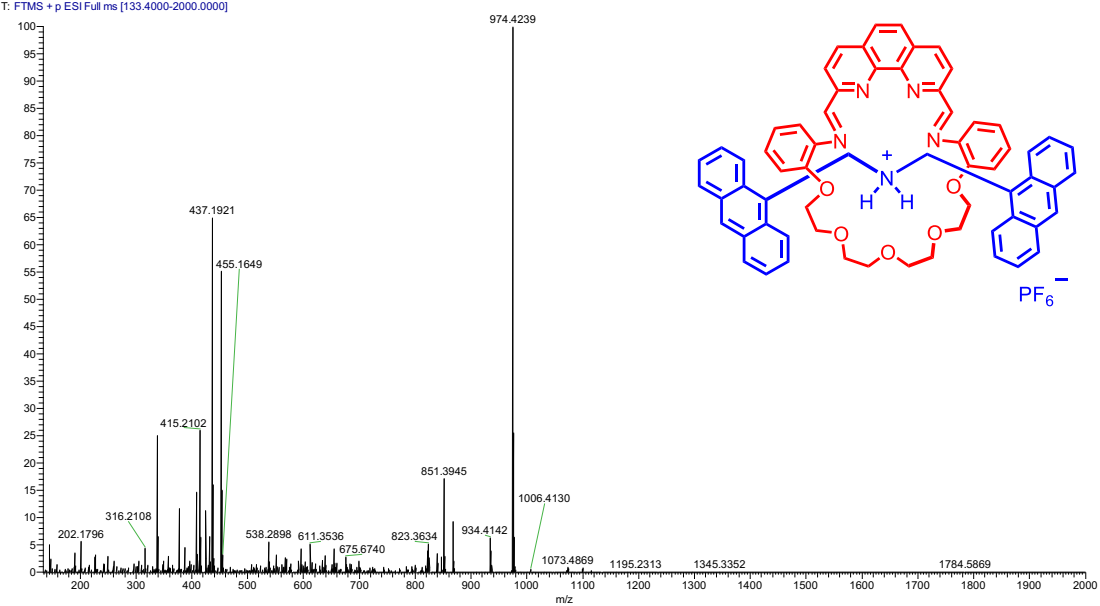

**Figure S24.** HRMS (ESI) of 11-H·PF<sub>6</sub>.

PH5RH-PF6-DIOME #4 RT: 0.02 AV: 1 NL: 2.53E8  
T: FTMS + p ESI Full ms [133.4000-2000.0000]

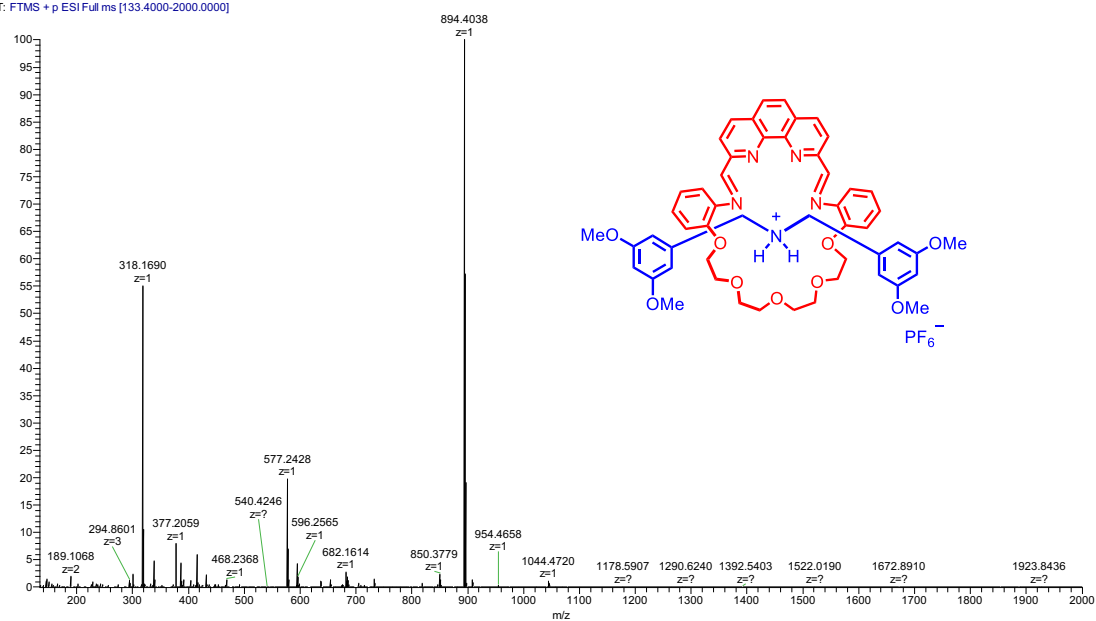

Figure S25. HRMS (ESI) of 12-H·PF<sub>6</sub>.

PH4RH-PF6 #5 RT: 0.02 AV: 1 NL: 9.39E6  
T: FTMS + p ESI Full ms [133.4000-2000.0000]

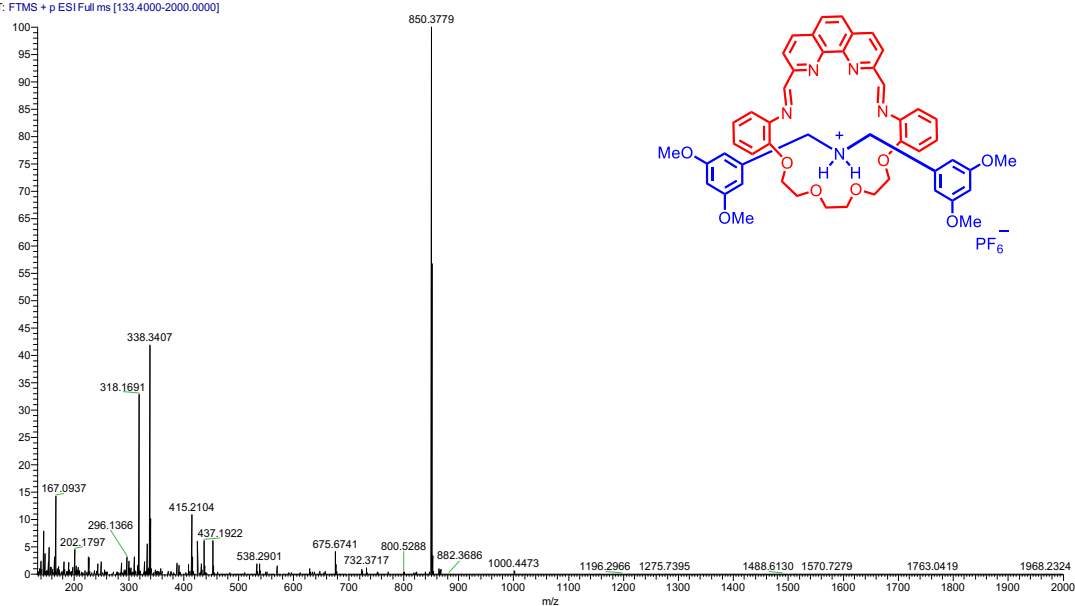

Figure S26. HRMS (ESI) of 13-H·PF<sub>6</sub>.



## X-Ray crystallography

Selected crystals were used for intensity data collection on a Bruker AXS Kappa Apex II Duo diffractometer at 173 K using frames of oscillation range  $0.3^\circ$ , with  $2^\circ < \theta < 28^\circ$ . An empirical absorption correction was applied using the SADABS program [7]. The structures were solved by the direct method and refined by full-matrix least-squares on  $F^2$  using the SHELXTL program package [8].

The crystal structures of rotaxanes **8**-H·PF<sub>6</sub> – **10**-H·PF<sub>6</sub> have been determined by single-crystal X-ray analysis. The crystal data and refinement parameters are presented in Table S2. All crystal drawings are produced by using software Diamond 3.0.

**Table S2. Crystallography data and structure refinement parameters of [2]rotaxanes **8**-H·PF<sub>6</sub> – **10**-H·PF<sub>6</sub>.**

| Complex                                                        | <b>8</b> -H·PF <sub>6</sub>                                                    | <b>9</b> -H·PF <sub>6</sub>                                                    | <b>10</b> -H·PF <sub>6</sub>                                                                     |
|----------------------------------------------------------------|--------------------------------------------------------------------------------|--------------------------------------------------------------------------------|--------------------------------------------------------------------------------------------------|
| Formula                                                        | C <sub>58</sub> H <sub>56</sub> F <sub>6</sub> N <sub>5</sub> O <sub>7</sub> P | C <sub>56</sub> H <sub>53</sub> F <sub>6</sub> N <sub>5</sub> O <sub>6</sub> P | C <sub>110</sub> H <sub>118</sub> F <sub>12</sub> N <sub>12</sub> O <sub>14</sub> P <sub>2</sub> |
| Formula Wt.                                                    | 1080.04                                                                        | 1036.00                                                                        | 2122.10                                                                                          |
| Crystal System                                                 | Monoclinic                                                                     | Monoclinic                                                                     | Triclinic                                                                                        |
| Space Group                                                    | P2 <sub>1</sub> /n                                                             | C2/c                                                                           | P-1                                                                                              |
| <i>a</i> [Å]                                                   | 11.335(4)                                                                      | 28.716(16)                                                                     | 14.868(3)                                                                                        |
| <i>b</i> [Å]                                                   | 27.667(9)                                                                      | 11.944(7)                                                                      | 17.598(4)                                                                                        |
| <i>c</i> [Å]                                                   | 17.518(6)                                                                      | 33.560(19)                                                                     | 23.155(5)                                                                                        |
| $\alpha$ [°]                                                   | 90                                                                             | 90                                                                             | 69.301(4)                                                                                        |
| $\beta$ [°]                                                    | 98.027(7)                                                                      | 108.951(10)                                                                    | 76.238(4)                                                                                        |
| $\gamma$ [°]                                                   | 90                                                                             | 90                                                                             | 69.289(4)                                                                                        |
| <i>V</i> [Å <sup>3</sup> ]                                     | 5440(3)                                                                        | 10887(11)                                                                      | 5257.0(19)                                                                                       |
| <i>Z</i>                                                       | 4                                                                              | 8                                                                              | 2                                                                                                |
| $\rho_c$ [gcm <sup>-3</sup> ]                                  | 1.304                                                                          | 1.264                                                                          | 1.341                                                                                            |
| $\mu$ [mm <sup>-1</sup> ]                                      | 0.128                                                                          | 0.124                                                                          | 0.132                                                                                            |
| <i>R</i> <sub>1</sub> <sup>[a]</sup> ( <i>I</i> > 2 $\sigma$ ) | 0.0638                                                                         | 0.0686                                                                         | 0.0616                                                                                           |
| <i>wR</i> <sub>2</sub> <sup>[b]</sup> (all data)               | 0.2025                                                                         | 0.2069                                                                         | 0.1861                                                                                           |
| GOF                                                            | 1.035                                                                          | 1.045                                                                          | 1.027                                                                                            |

## Summary of validation response

### Rotaxane **8**-H·PF<sub>6</sub>

- A solvent void contains one to two disordered dichloromethane molecules, which is consistent with the crystallization conditions. And a solvent mask was applied for that.

- The large errors on the unit cell lengths and unit cell volume is speculated to be arose from the crystal not sufficiently be centered and the deficiencies from the used instrument.

\_vrf\_PLAT220

PROBLEM: NonSolvent Resd 1 C Ueq(max)/Ueq(min) Range 5.1 Ratio

RESPONSE: Due to the slightly poor data collected

\_vrf\_PLAT241

PROBLEM: High 'MainMol' Ueq as Compared to Neighbors of C48 Check

RESPONSE: Due to the disordered atoms of C47 and C47A

\_vrf\_PLAT260

PROBLEM: Large Average Ueq of Residue Including P1 0.101 Check

RESPONSE: Due to the slightly poor data collected

\_vrf\_PLAT329

PROBLEM: Carbon Atom Hybridisation Unclear for ..... C51 Check

RESPONSE: Should be sp<sup>3</sup>; but not shown due to the disorder

\_vrf\_PLAT911

PROBLEM: Missing FCF Refl Between Thmin & STh/L= 0.600 3 Report

RESPONSE: Due to the slightly poor data collected

\_vrf\_PLAT918

PROBLEM: Reflection(s) with I(obs) much Smaller I(calc) . 3 Check

RESPONSE: Due to the use of solvent mask for two disordered dichloromethane molecules

\_vrf\_PLAT975

PROBLEM: Check Calcd Resid. Dens. 0.97A From C52 0.56 eA-3

RESPONSE: missed hydrogen atoms due to the disordered C51 and C51A

#### *Rotaxane 9-H•PF<sub>6</sub>*

- Large residual peaks are found around the PF<sub>6</sub> counter anions, but those are confirmed not to be the disorder components arose from either the P or F atoms.
- A solvent void contains two unsolvable acetonitrile molecules, which is consistent with the crystallization conditions. And a solvent mask was applied for that.
- Extreme short H•••H contact distance between H8B and H21 is considered to be driven by the steric constraints imposed by the structure, in combination with the strong  $\pi$ - $\pi$  stacking interaction between the phenanthroline and the anthracene.
- The large errors on the unit cell lengths and unit cell volume is speculated to be arose from the crystal not sufficiently be centered and the deficiencies from the used instrument.

*Rotaxane 10-H•PF<sub>6</sub>*

- The large errors on the unit cell lengths and unit cell volume is speculated to be arose from the crystal not sufficiently be centered and the deficiencies from the used instrument.

\_vrf\_PLAT230

PROBLEM: Hirshfeld Test Diff for C41 --C42 . 9.7 s.u.

RESPONSE: the residual density next to C42 is checked and not considered as the disorder component of C42.

\_vrf\_PLAT360

PROBLEM: Short C(sp<sup>3</sup>)-C(sp<sup>3</sup>) Bond C88 - C89 . 1.33 Ang.

RESPONSE: Due to the large ellipsoid sizes of both C88 and C89 but no acceptable disorder components are found

\_vrf\_PLAT410

PROBLEM: Short Intra H...H Contact H86 ..H88A . 1.81 Ang.

RESPONSE: the steric constraint of the structure forces the orientation of C86 close to C88

## References

- [1] Sharghi, H.; Nasser, M. A.; Niknam, K. Phenol-Containing Macrocyclic Diamides as New Catalysts in the Highly Regioselective Conversion of Epoxides to  $\beta$ -Hydroxy Thiocyanates. *J. Org. Chem.* **2001**, *66* (22), 7287–7293.
- [2] Xiao, C.-L.; Wang, C.-Z.; Yuan, L.-Y.; Li, B.; He, H.; Wang, S.; Zhao, Y.-L.; Chai, Z.-F.; Shi, W.-Q. Excellent Selectivity for Actinides with a Tetradentate 2,9-Diamide-1,10-Phenanthroline Ligand in Highly Acidic Solution: A Hard–Soft Donor Combined Strategy. *Inorg. Chem.* **2014**, *53* (3), 1712–1720.
- [3] Wong, W.-Y.; Leung, K. C.-F.; Stoddart, J. F. Self-assembly, Stability Quantification, Controlled Molecular Switching, and Sensing Properties of an Anthracene-containing Dynamic [2]Rotaxane. *Org. Biomol. Chem.* **2010**, *8* (10), 2332–2343.
- [4] Lan, P.; Berta, D.; Porco, J. A.; South, M. S.; Parlow, J. J. Polymer-Assisted Solution-Phase (PASP) Suzuki Couplings Employing an Anthracene-Tagged Palladium Catalyst. *J. Org. Chem.* **2003**, *68* (25), 9678–9686.
- [5] Glink, P. T.; Oliva, A. I.; Stoddart, J. F.; White, A. J. P.; Williams, D. J. Template-Directed Synthesis of a [2]Rotaxane by the Clipping under Thermodynamic Control of a Crown Ether Like Macrocycle Around a Dialkylammonium Ion. *Angew. Chem. Int. Ed.* **2001**, *40* (10), 1870–1875.
- [6] Cantrill, S. J.; Fyfe, M. C. T.; Heiss, A. M.; Stoddart, J. F.; White, A. J. P.; Williams, D. J. Tribenzo[27]crown-9: A New Ring for Dibenzylammonium Rods. *Org. Lett.* **2000**, *2* (1), 61–64.
- [7] Sheldrick, G. M. *SADABS: Program for Empirical Absorption Correction of Area Detector Data*, University of Göttingen, Göttingen, Germany, 1996.
- [8] Sheldrick, G. M. *SHELXTL 5.10 for Windows Structure Determination Software Programs*, Bruker Analytical X-ray Systems, Inc., Madison, Wisconsin, USA, 1997.
