# Supplementary material for: π-Stacking Stopper-Macrocycle Stabilized Dynamically Interlocked [2]Rotaxanes
Source: Molecules. 2021 Aug 3;26(15):4704. doi: 10.3390/molecules26154704 (PMC8347712; doi:10.3390/molecules26154704)
Supplement: Supplementary file 1 [file molecules-26-04704-s001.zip]

Archive with 8 entries (8 files):
- 8.cif
- __MACOSX/._8.cif
- 9.cif
- __MACOSX/._9.cif
- 10.cif
- __MACOSX/._10.cif
- ESI.pdf
- __MACOSX/._ESI.pdf
