# Supplementary material for: π-Stacking Stopper-Macrocycle Stabilized Dynamically Interlocked [2]Rotaxanes
Source: Molecules. 2021 Aug 3;26(15):4704. doi: 10.3390/molecules26154704 (PMC8347712; doi:10.3390/molecules26154704)
Supplement: Supplementary file 1 [file molecules-26-04704-s001.zip › 8.cif]

data_8HPF6
_audit_creation_date               2020-07-16
_audit_creation_method
;
Olex2 1.2
(compiled 2018.05.29 svn.r3508 for OlexSys, GUI svn.r5506)
;
_shelx_SHELXL_version_number       '2018/3'
_audit_contact_author_address      ?
_audit_contact_author_email        ?
_audit_contact_author_name         None
_audit_contact_author_phone        ?
_publ_contact_author_id_orcid      ?
_publ_section_references
;
Dolomanov, O.V., Bourhis, L.J., Gildea, R.J, Howard, J.A.K. & Puschmann, H.
 (2009), J. Appl. Cryst. 42, 339-341.

Sheldrick, G.M. (2015). Acta Cryst. A71, 3-8.

Sheldrick, G.M. (2015). Acta Cryst. C71, 3-8.
;
_chemical_name_common              ?
_chemical_name_systematic          ?
_chemical_formula_moiety           'F6 P, C24 H24 N O2, C34 H20 N4 O5'
_chemical_formula_sum              'C58 H56 F6 N5 O7 P'
_chemical_formula_weight           1080.04
_chemical_melting_point            ?
loop_
  _atom_type_symbol
  _atom_type_description
  _atom_type_scat_dispersion_real
  _atom_type_scat_dispersion_imag
  _atom_type_scat_source
 'C' 'C' 0.0033 0.0016 'International Tables Vol C Tables 4.2.6.8 and 6.1.1.4'
 'H' 'H' 0.0000 0.0000 'International Tables Vol C Tables 4.2.6.8 and 6.1.1.4'
 'F' 'F' 0.0171 0.0103 'International Tables Vol C Tables 4.2.6.8 and 6.1.1.4'
 'N' 'N' 0.0061 0.0033 'International Tables Vol C Tables 4.2.6.8 and 6.1.1.4'
 'O' 'O' 0.0106 0.0060 'International Tables Vol C Tables 4.2.6.8 and 6.1.1.4'
 'P' 'P' 0.1023 0.0942 'International Tables Vol C Tables 4.2.6.8 and 6.1.1.4'

_shelx_space_group_comment
;
The symmetry employed for this shelxl refinement is uniquely defined
by the following loop, which should always be used as a source of
symmetry information in preference to the above space-group names.
They are only intended as comments.
;
_space_group_crystal_system        'monoclinic'
_space_group_IT_number             14
_space_group_name_H-M_alt          'P 1 21/n 1'
_space_group_name_Hall             '-P 2yn'
loop_
  _space_group_symop_operation_xyz
 'x, y, z'
 '-x+1/2, y+1/2, -z+1/2'
 '-x, -y, -z'
 'x-1/2, -y-1/2, z-1/2'

_cell_length_a                     11.335(4)
_cell_length_b                     27.667(9)
_cell_length_c                     17.518(6)
_cell_angle_alpha                  90
_cell_angle_beta                   98.027(7)
_cell_angle_gamma                  90
_cell_volume                       5440(3)
_cell_formula_units_Z              4
_cell_measurement_reflns_used      9917
_cell_measurement_temperature      173
_cell_measurement_theta_max        27.58
_cell_measurement_theta_min        2.46
_shelx_estimated_absorpt_T_max     0.975
_shelx_estimated_absorpt_T_min     0.962
_exptl_absorpt_coefficient_mu      0.128
_exptl_absorpt_correction_T_max    0.7456
_exptl_absorpt_correction_T_min    0.6935
_exptl_absorpt_correction_type     multi-scan
_exptl_absorpt_process_details
;
SADABS-2008/1 (Bruker,2008) was used for absorption correction.
wR2(int) was 0.0533 before and 0.0423 after correction.
The Ratio of minimum to maximum transmission is 0.9301.
The \l/2 correction factor is 0.0015.
;
_exptl_absorpt_special_details     ?
_exptl_crystal_colour              'clear yellowish yellow'
_exptl_crystal_colour_lustre       clear
_exptl_crystal_colour_modifier     yellowish
_exptl_crystal_colour_primary      yellow
_exptl_crystal_density_diffrn      1.319
_exptl_crystal_density_meas        ?
_exptl_crystal_density_method      ?
_exptl_crystal_description         needle
_exptl_crystal_F_000               2256
_exptl_crystal_size_max            0.3
_exptl_crystal_size_mid            0.3
_exptl_crystal_size_min            0.2
_exptl_transmission_factor_max     ?
_exptl_transmission_factor_min     ?
_diffrn_reflns_av_R_equivalents    0.0374
_diffrn_reflns_av_unetI/netI       0.0197
_diffrn_reflns_Laue_measured_fraction_full  1.000
_diffrn_reflns_Laue_measured_fraction_max  0.988
_diffrn_reflns_limit_h_max         14
_diffrn_reflns_limit_h_min         -14
_diffrn_reflns_limit_k_max         36
_diffrn_reflns_limit_k_min         -36
_diffrn_reflns_limit_l_max         22
_diffrn_reflns_limit_l_min         -23
_diffrn_reflns_number              123605
_diffrn_reflns_point_group_measured_fraction_full  1.000
_diffrn_reflns_point_group_measured_fraction_max  0.988
_diffrn_reflns_theta_full          25.242
_diffrn_reflns_theta_max           27.974
_diffrn_reflns_theta_min           1.386
_diffrn_ambient_temperature        173
_diffrn_detector                   'Bruker APEX2 area detector'
_diffrn_detector_area_resol_mean   7.9
_diffrn_detector_type              'CCD area detector'
_diffrn_measured_fraction_theta_full  1.000
_diffrn_measured_fraction_theta_max  0.988
_diffrn_measurement_device         'three-circle diffractometer'
_diffrn_measurement_device_type    'Bruker SMART APEX2 area detector'
_diffrn_measurement_method         '\w and \f scans'
_diffrn_radiation_monochromator    'mirror optics'
_diffrn_radiation_probe            x-ray
_diffrn_radiation_type             MoK\a
_diffrn_radiation_wavelength       0.71073
_diffrn_source                     'microfocus sealed X-ray tube'
_diffrn_source_type                'Incoatec I\ms'
_diffrn_standards_number           0
_reflns_Friedel_coverage           0.000
_reflns_Friedel_fraction_full      .
_reflns_Friedel_fraction_max       .
_reflns_number_gt                  9895
_reflns_number_total               12949
_reflns_special_details
;
 Reflections were merged by SHELXL according to the crystal
 class for the calculation of statistics and refinement.
 
 Structure factors included contributions from the .fab file.
 
 _reflns_Friedel_fraction is defined as the number of unique
 Friedel pairs measured divided by the number that would be
 possible theoretically, ignoring centric projections and
 systematic absences.
;
_reflns_threshold_expression       'I > 2\s(I)'
_computing_cell_refinement         'SAINT V8.18C (?, 2016)'
_computing_data_collection         ?
_computing_data_reduction          'SAINT V8.18C (?, 2016)'
_computing_molecular_graphics      'Olex2 (Dolomanov et al., 2009)'
_computing_publication_material    'Olex2 (Dolomanov et al., 2009)'
_computing_structure_refinement    'ShelXL (Sheldrick, 2015)'
_computing_structure_solution      'ShelXT (Sheldrick, 2015)'
_refine_diff_density_max           0.842
_refine_diff_density_min           -0.504
_refine_diff_density_rms           0.065
_refine_ls_extinction_coef         .
_refine_ls_extinction_method       none
_refine_ls_goodness_of_fit_ref     1.035
_refine_ls_hydrogen_treatment      constr
_refine_ls_matrix_type             full
_refine_ls_number_parameters       741
_refine_ls_number_reflns           12949
_refine_ls_number_restraints       0
_refine_ls_R_factor_all            0.0825
_refine_ls_R_factor_gt             0.0638
_refine_ls_restrained_S_all        1.035
_refine_ls_shift/su_max            0.001
_refine_ls_shift/su_mean           0.000
_refine_ls_structure_factor_coef   Fsqd
_refine_ls_weighting_details      
 'w=1/[\s^2^(Fo^2^)+(0.1061P)^2^+3.9629P] where P=(Fo^2^+2Fc^2^)/3'
_refine_ls_weighting_scheme        calc
_refine_ls_wR_factor_gt            0.1831
_refine_ls_wR_factor_ref           0.2025
_refine_special_details            ?
_olex2_refinement_description
;
1. Fixed Uiso
 At 1.2 times of:
  All C(H) groups, All C(H,H) groups, All N(H,H) groups
 At 1.5 times of:
  All C(H,H,H) groups
2. Others
 Fixed Sof: O4(0.8) O6(0.6) C46(0.8) C47(0.8) C51(0.4) C51A(0.6) C46A(0.2)
 C47A(0.2) O4A(0.2) O6A(0.4)
3.a Secondary CH2 refined with riding coordinates:
 N1(H1A,H1B), C7(H7A,H7B), C8(H8A,H8B), C48(H48A,H48B), C49(H49A,H49B)
3.b Aromatic/amide H refined with riding coordinates:
 C1(H1), C3(H3), C5(H5), C11(H11), C12(H12), C13(H13), C14(H14), C16(H16),
 C18(H18), C19(H19), C20(H20), C21(H21), C25(H25), C27(H27), C28(H28), C32(H32),
  C33(H33), C35(H35), C36(H36), C38(H38), C40(H40), C41(H41), C42(H42),
 C43(H43), C54(H54), C55(H55), C56(H56), C57(H57)
3.c Idealised Me refined as rotating group:
 C23(H23A,H23B,H23C), C24(H24A,H24B,H24C)
;
_atom_sites_solution_hydrogens     geom
_atom_sites_solution_primary       dual
_atom_sites_solution_secondary     ?
loop_
  _atom_site_label
  _atom_site_type_symbol
  _atom_site_fract_x
  _atom_site_fract_y
  _atom_site_fract_z
  _atom_site_U_iso_or_equiv
  _atom_site_adp_type
  _atom_site_occupancy
  _atom_site_site_symmetry_order
  _atom_site_calc_flag
  _atom_site_refinement_flags_posn
  _atom_site_refinement_flags_adp
  _atom_site_refinement_flags_occupancy
  _atom_site_disorder_assembly
  _atom_site_disorder_group
 P1 P 0.93920(6) 0.64126(3) 0.62206(4) 0.04905(18) Uani 1 1 d . . . . .
 F1 F 0.9394(2) 0.58979(9) 0.58344(17) 0.1102(9) Uani 1 1 d . . . . .
 F2 F 0.8535(2) 0.62291(10) 0.67994(13) 0.0987(7) Uani 1 1 d . . . . .
 F3 F 1.0530(2) 0.62695(11) 0.68111(15) 0.1101(9) Uani 1 1 d . . . . .
 F4 F 0.9428(3) 0.69205(8) 0.66281(18) 0.1184(10) Uani 1 1 d . . . . .
 F5 F 1.0250(2) 0.65875(11) 0.56397(15) 0.1123(9) Uani 1 1 d . . . . .
 F6 F 0.8263(2) 0.65381(11) 0.56204(14) 0.1057(8) Uani 1 1 d . . . . .
 O1 O 0.54674(17) 0.66875(5) 0.54860(9) 0.0448(4) Uani 1 1 d . . . . .
 O2 O 0.4543(2) 0.81928(6) 0.42252(11) 0.0673(6) Uani 1 1 d . . . . .
 O3 O 0.72781(17) 0.71125(6) 0.20385(12) 0.0540(5) Uani 1 1 d . . . . .
 O4 O 0.6438(3) 0.66454(10) 0.05522(14) 0.0621(6) Uani 0.8 1 d . . P A 1
 O5 O 0.4669(4) 0.60091(11) -0.01216(14) 0.1022(10) Uani 1 1 d . . . . .
 O6 O 0.2821(6) 0.6046(2) 0.0552(2) 0.0775(14) Uani 0.6 1 d . . P B 1
 O7 O 0.18263(16) 0.63390(7) 0.18908(10) 0.0498(4) Uani 1 1 d . . . . .
 N1 N 0.52437(15) 0.62138(6) 0.27222(9) 0.0284(3) Uani 1 1 d . . . . .
 H1A H 0.482361 0.602518 0.301391 0.034 Uiso 1 1 calc R . . . .
 H1B H 0.600869 0.622883 0.296180 0.034 Uiso 1 1 calc R . . . .
 N2 N 0.28168(14) 0.60174(6) 0.32838(10) 0.0313(3) Uani 1 1 d . . . . .
 N3 N 0.46665(13) 0.54060(5) 0.38155(8) 0.0238(3) Uani 1 1 d . . . . .
 N4 N 0.69839(13) 0.56913(6) 0.38582(9) 0.0260(3) Uani 1 1 d . . . . .
 N5 N 0.75651(15) 0.66173(6) 0.33959(11) 0.0338(4) Uani 1 1 d . . . . .
 C1 C 0.50750(17) 0.67090(7) 0.41382(12) 0.0302(4) Uani 1 1 d . . . . .
 H1 H 0.519396 0.636916 0.413723 0.036 Uiso 1 1 calc R . . . .
 C2 C 0.51727(18) 0.69624(7) 0.48366(12) 0.0315(4) Uani 1 1 d . . . . .
 C3 C 0.4977(2) 0.74571(7) 0.48477(13) 0.0371(5) Uani 1 1 d . . . . .
 H3 H 0.503220 0.762629 0.532327 0.044 Uiso 1 1 calc R . . . .
 C4 C 0.4696(2) 0.77034(8) 0.41479(14) 0.0421(5) Uani 1 1 d . . . . .
 C5 C 0.4611(2) 0.74592(8) 0.34457(13) 0.0374(5) Uani 1 1 d . . . . .
 H5 H 0.442523 0.762959 0.297334 0.045 Uiso 1 1 calc R . . . .
 C6 C 0.48033(16) 0.69576(7) 0.34474(11) 0.0282(4) Uani 1 1 d . . . . .
 C7 C 0.47247(17) 0.67097(7) 0.26714(11) 0.0293(4) Uani 1 1 d . . . . .
 H7A H 0.387798 0.668984 0.243966 0.035 Uiso 1 1 calc R . . . .
 H7B H 0.514856 0.690801 0.232568 0.035 Uiso 1 1 calc R . . . .
 C8 C 0.5228(2) 0.59845(8) 0.19400(12) 0.0366(5) Uani 1 1 d . . . . .
 H8A H 0.565918 0.619487 0.161492 0.044 Uiso 1 1 calc R . . . .
 H8B H 0.439351 0.595496 0.168698 0.044 Uiso 1 1 calc R . . . .
 C9 C 0.5805(2) 0.54862(7) 0.20025(11) 0.0338(4) Uani 1 1 d . . . . .
 C10 C 0.5102(2) 0.50692(8) 0.20492(11) 0.0344(4) Uani 1 1 d . . . . .
 C11 C 0.3822(2) 0.50805(10) 0.20055(13) 0.0452(5) Uani 1 1 d . . . . .
 H11 H 0.341316 0.538007 0.192755 0.054 Uiso 1 1 calc R . . . .
 C12 C 0.3189(3) 0.46668(11) 0.20746(15) 0.0546(7) Uani 1 1 d . . . . .
 H12 H 0.234704 0.468445 0.204573 0.066 Uiso 1 1 calc R . . . .
 C13 C 0.3760(3) 0.42108(11) 0.21886(15) 0.0559(7) Uani 1 1 d . . . . .
 H13 H 0.330292 0.392753 0.223663 0.067 Uiso 1 1 calc R . . . .
 C14 C 0.4954(3) 0.41811(9) 0.22283(13) 0.0488(6) Uani 1 1 d . . . . .
 H14 H 0.532917 0.387441 0.230336 0.059 Uiso 1 1 calc R . . . .
 C15 C 0.5670(2) 0.46017(8) 0.21599(11) 0.0380(5) Uani 1 1 d . . . . .
 C16 C 0.6904(2) 0.45701(8) 0.22114(12) 0.0411(5) Uani 1 1 d . . . . .
 H16 H 0.727343 0.426316 0.229848 0.049 Uiso 1 1 calc R . . . .
 C17 C 0.7615(2) 0.49742(8) 0.21392(12) 0.0398(5) Uani 1 1 d . . . . .
 C18 C 0.8882(3) 0.49365(11) 0.21868(17) 0.0576(7) Uani 1 1 d . . . . .
 H18 H 0.925169 0.462899 0.226631 0.069 Uiso 1 1 calc R . . . .
 C19 C 0.9563(3) 0.53334(13) 0.2120(2) 0.0696(9) Uani 1 1 d . . . . .
 H19 H 1.040346 0.530251 0.215091 0.084 Uiso 1 1 calc R . . . .
 C20 C 0.9019(3) 0.57951(12) 0.20044(19) 0.0636(8) Uani 1 1 d . . . . .
 H20 H 0.950319 0.607059 0.195490 0.076 Uiso 1 1 calc R . . . .
 C21 C 0.7828(2) 0.58505(10) 0.19632(15) 0.0484(6) Uani 1 1 d . . . . .
 H21 H 0.749276 0.616460 0.189040 0.058 Uiso 1 1 calc R . . . .
 C22 C 0.7056(2) 0.54439(8) 0.20273(12) 0.0369(5) Uani 1 1 d . . . . .
 C23 C 0.5776(3) 0.69250(9) 0.62055(14) 0.0540(7) Uani 1 1 d . . . . .
 H23A H 0.638144 0.717156 0.615694 0.081 Uiso 1 1 calc GR . . . .
 H23B H 0.609227 0.668839 0.659760 0.081 Uiso 1 1 calc GR . . . .
 H23C H 0.506571 0.707890 0.635812 0.081 Uiso 1 1 calc GR . . . .
 C24 C 0.4324(5) 0.84640(10) 0.3522(2) 0.0885(13) Uani 1 1 d . . . . .
 H24A H 0.498578 0.841614 0.322428 0.133 Uiso 1 1 calc GR . . . .
 H24B H 0.425733 0.880806 0.364174 0.133 Uiso 1 1 calc GR . . . .
 H24C H 0.358123 0.835319 0.321899 0.133 Uiso 1 1 calc GR . . . .
 C25 C 0.26336(16) 0.56543(7) 0.36971(11) 0.0294(4) Uani 1 1 d . . . . .
 H25 H 0.190050 0.562802 0.389868 0.035 Uiso 1 1 calc R . . . .
 C26 C 0.35467(16) 0.52721(7) 0.38685(10) 0.0255(4) Uani 1 1 d . . . . .
 C27 C 0.32217(17) 0.48041(7) 0.40797(11) 0.0297(4) Uani 1 1 d . . . . .
 H27 H 0.241696 0.473036 0.412803 0.036 Uiso 1 1 calc R . . . .
 C28 C 0.40932(18) 0.44565(7) 0.42143(11) 0.0306(4) Uani 1 1 d . . . . .
 H28 H 0.389350 0.413527 0.433891 0.037 Uiso 1 1 calc R . . . .
 C29 C 0.52880(17) 0.45820(7) 0.41653(10) 0.0268(4) Uani 1 1 d . . . . .
 C30 C 0.55303(16) 0.50682(6) 0.39777(9) 0.0230(3) Uani 1 1 d . . . . .
 C31 C 0.67636(16) 0.52188(6) 0.39806(10) 0.0239(3) Uani 1 1 d . . . . .
 C32 C 0.62434(19) 0.42382(7) 0.42971(12) 0.0334(4) Uani 1 1 d . . . . .
 H32 H 0.607179 0.391096 0.440384 0.040 Uiso 1 1 calc R . . . .
 C33 C 0.73884(19) 0.43736(7) 0.42717(12) 0.0336(4) Uani 1 1 d . . . . .
 H33 H 0.800276 0.413759 0.434218 0.040 Uiso 1 1 calc R . . . .
 C34 C 0.76847(17) 0.48698(7) 0.41393(11) 0.0285(4) Uani 1 1 d . . . . .
 C35 C 0.88687(18) 0.50320(8) 0.41833(13) 0.0363(4) Uani 1 1 d . . . . .
 H35 H 0.951097 0.480927 0.427339 0.044 Uiso 1 1 calc R . . . .
 C36 C 0.90856(18) 0.55143(8) 0.40948(13) 0.0374(5) Uani 1 1 d . . . . .
 H36 H 0.988038 0.563197 0.414974 0.045 Uiso 1 1 calc R . . . .
 C37 C 0.81162(17) 0.58350(7) 0.39211(11) 0.0297(4) Uani 1 1 d . . . . .
 C38 C 0.83348(17) 0.63565(7) 0.38112(13) 0.0338(4) Uani 1 1 d . . . . .
 H38 H 0.905471 0.649866 0.405197 0.041 Uiso 1 1 calc R . . . .
 C39 C 0.77407(18) 0.71272(8) 0.33961(15) 0.0394(5) Uani 1 1 d . . . . .
 C40 C 0.8050(2) 0.73750(9) 0.40876(18) 0.0520(6) Uani 1 1 d . . . . .
 H40 H 0.818701 0.720138 0.455956 0.062 Uiso 1 1 calc R . . . .
 C41 C 0.8158(3) 0.78772(10) 0.4089(2) 0.0726(9) Uani 1 1 d . . . . .
 H41 H 0.839823 0.804548 0.455738 0.087 Uiso 1 1 calc R . . . .
 C42 C 0.7914(4) 0.81258(10) 0.3408(2) 0.0796(11) Uani 1 1 d . . . . .
 H42 H 0.796888 0.846846 0.341405 0.096 Uiso 1 1 calc R . . . .
 C43 C 0.7591(3) 0.78905(9) 0.2713(2) 0.0623(8) Uani 1 1 d . . . . .
 H43 H 0.741736 0.807042 0.224879 0.075 Uiso 1 1 calc R . . . .
 C44 C 0.7521(2) 0.73844(8) 0.26994(17) 0.0456(6) Uani 1 1 d . . . . .
 C45 C 0.7099(3) 0.73651(12) 0.1307(2) 0.0700(9) Uani 1 1 d . . . . .
 C46 C 0.7333(5) 0.6999(2) 0.0644(3) 0.0625(11) Uani 0.8 1 d . . P A 1
 C47 C 0.6526(6) 0.6362(2) -0.0127(2) 0.0774(13) Uani 0.8 1 d . . P A 1
 C48 C 0.5898(5) 0.59158(17) -0.00796(19) 0.1054(17) Uani 1 1 d . . . . .
 H48A H 0.604256 0.570032 -0.050813 0.126 Uiso 1 1 calc R . . A .
 H48B H 0.619022 0.575123 0.041245 0.126 Uiso 1 1 calc R . . A .
 C49 C 0.3975(6) 0.55842(15) -0.0078(2) 0.1105(19) Uani 1 1 d . . . . .
 H49A H 0.423371 0.541629 0.041574 0.133 Uiso 1 1 calc R . . . .
 H49B H 0.409790 0.536221 -0.050359 0.133 Uiso 1 1 calc R . . . .
 C50 C 0.2717(6) 0.57084(19) -0.0133(2) 0.1164(19) Uani 1 1 d . . . . .
 C51 C 0.2258(10) 0.6366(4) 0.0565(4) 0.066(2) Uani 0.4 1 d . . P B 1
 C51A C 0.1559(7) 0.6136(4) 0.0555(4) 0.0763(18) Uani 0.6 1 d . . P B 2
 C52 C 0.1458(3) 0.65422(12) 0.11366(17) 0.0649(8) Uani 1 1 d . . . . .
 C53 C 0.15545(19) 0.65982(8) 0.25125(15) 0.0410(5) Uani 1 1 d . . . . .
 C54 C 0.0858(2) 0.70170(9) 0.24661(19) 0.0554(7) Uani 1 1 d . . . . .
 H54 H 0.053561 0.714321 0.197680 0.066 Uiso 1 1 calc R . . . .
 C55 C 0.0635(2) 0.72501(10) 0.3139(2) 0.0625(8) Uani 1 1 d . . . . .
 H55 H 0.017347 0.753780 0.310328 0.075 Uiso 1 1 calc R . . . .
 C56 C 0.1077(2) 0.70679(10) 0.3852(2) 0.0577(7) Uani 1 1 d . . . . .
 H56 H 0.091686 0.722802 0.430607 0.069 Uiso 1 1 calc R . . . .
 C57 C 0.1763(2) 0.66460(9) 0.39064(16) 0.0451(5) Uani 1 1 d . . . . .
 H57 H 0.206500 0.651823 0.439835 0.054 Uiso 1 1 calc R . . . .
 C58 C 0.20051(17) 0.64119(7) 0.32389(13) 0.0349(4) Uani 1 1 d . . . . .
 C46A C 0.6476(17) 0.7085(6) 0.0811(8) 0.066(4) Uani 0.2 1 d . . P A 2
 C47A C 0.729(2) 0.6469(10) -0.0051(10) 0.085(7) Uani 0.2 1 d . . P A 2
 O4A O 0.7544(19) 0.6762(7) 0.0709(8) 0.089(6) Uani 0.2 1 d . . P A 2
 O6A O 0.2093(12) 0.5877(3) 0.0475(4) 0.083(3) Uani 0.4 1 d . . P B 2

loop_
  _atom_site_aniso_label
  _atom_site_aniso_U_11
  _atom_site_aniso_U_22
  _atom_site_aniso_U_33
  _atom_site_aniso_U_23
  _atom_site_aniso_U_13
  _atom_site_aniso_U_12
 P1 0.0500(4) 0.0445(4) 0.0528(4) -0.0074(3) 0.0076(3) 0.0003(3)
 F1 0.1092(18) 0.0743(15) 0.142(2) -0.0504(15) 0.0002(16) 0.0152(13)
 F2 0.0936(16) 0.128(2) 0.0780(14) -0.0013(13) 0.0258(12) -0.0375(14)
 F3 0.0718(14) 0.155(2) 0.0941(16) -0.0023(16) -0.0221(12) 0.0027(15)
 F4 0.169(3) 0.0575(13) 0.136(2) -0.0341(14) 0.0452(19) -0.0123(14)
 F5 0.1001(18) 0.157(2) 0.0882(16) 0.0104(16) 0.0422(14) -0.0246(17)
 F6 0.0770(14) 0.156(2) 0.0810(14) 0.0133(15) 0.0013(11) 0.0423(15)
 O1 0.0736(12) 0.0252(7) 0.0344(8) 0.0002(6) 0.0038(7) -0.0039(7)
 O2 0.1205(19) 0.0262(8) 0.0526(11) -0.0028(7) 0.0034(11) 0.0239(10)
 O3 0.0545(11) 0.0404(9) 0.0647(11) 0.0194(8) 0.0000(9) -0.0030(8)
 O4 0.0750(19) 0.0684(18) 0.0461(13) 0.0053(12) 0.0193(12) 0.0070(14)
 O5 0.170(3) 0.0801(18) 0.0592(14) 0.0107(13) 0.0269(17) 0.052(2)
 O6 0.121(4) 0.068(3) 0.0383(18) 0.0013(19) -0.007(2) 0.034(3)
 O7 0.0502(10) 0.0514(10) 0.0465(9) 0.0178(8) 0.0026(8) 0.0163(8)
 N1 0.0306(8) 0.0262(8) 0.0289(8) 0.0001(6) 0.0060(6) 0.0026(6)
 N2 0.0247(8) 0.0304(8) 0.0385(9) 0.0036(7) 0.0035(6) 0.0028(6)
 N3 0.0238(7) 0.0239(7) 0.0238(7) 0.0007(6) 0.0033(6) 0.0007(6)
 N4 0.0237(7) 0.0248(7) 0.0294(7) 0.0004(6) 0.0031(6) 0.0000(6)
 N5 0.0257(8) 0.0268(8) 0.0494(10) 0.0046(7) 0.0077(7) -0.0021(6)
 C1 0.0320(10) 0.0211(8) 0.0386(10) -0.0017(7) 0.0081(8) -0.0016(7)
 C2 0.0337(10) 0.0257(9) 0.0358(10) -0.0006(7) 0.0070(8) -0.0028(7)
 C3 0.0438(12) 0.0273(10) 0.0404(11) -0.0059(8) 0.0067(9) 0.0020(8)
 C4 0.0532(14) 0.0244(10) 0.0481(12) -0.0024(9) 0.0052(10) 0.0103(9)
 C5 0.0427(12) 0.0286(10) 0.0404(11) 0.0022(8) 0.0043(9) 0.0094(8)
 C6 0.0223(8) 0.0264(9) 0.0363(10) -0.0007(7) 0.0060(7) 0.0001(7)
 C7 0.0287(9) 0.0251(9) 0.0343(9) 0.0025(7) 0.0053(7) 0.0030(7)
 C8 0.0491(12) 0.0332(10) 0.0281(9) -0.0011(8) 0.0075(8) 0.0078(9)
 C9 0.0472(12) 0.0313(10) 0.0242(9) -0.0015(7) 0.0094(8) 0.0064(8)
 C10 0.0457(12) 0.0370(11) 0.0209(8) -0.0047(7) 0.0062(8) 0.0025(9)
 C11 0.0490(13) 0.0525(14) 0.0343(11) -0.0069(10) 0.0070(9) 0.0023(11)
 C12 0.0511(15) 0.0714(18) 0.0418(13) -0.0105(12) 0.0081(11) -0.0140(13)
 C13 0.0732(19) 0.0549(16) 0.0400(12) -0.0089(11) 0.0094(12) -0.0234(14)
 C14 0.0757(18) 0.0363(12) 0.0350(11) -0.0045(9) 0.0098(11) -0.0074(11)
 C15 0.0577(14) 0.0330(10) 0.0242(9) -0.0059(8) 0.0089(9) 0.0000(9)
 C16 0.0599(14) 0.0322(10) 0.0324(10) -0.0035(8) 0.0105(10) 0.0109(10)
 C17 0.0481(13) 0.0401(12) 0.0337(10) -0.0043(9) 0.0142(9) 0.0095(9)
 C18 0.0526(15) 0.0612(17) 0.0627(16) -0.0058(13) 0.0214(13) 0.0174(13)
 C19 0.0486(16) 0.082(2) 0.085(2) -0.0079(18) 0.0314(15) 0.0030(15)
 C20 0.0615(18) 0.0644(18) 0.0717(19) -0.0029(15) 0.0328(15) -0.0125(14)
 C21 0.0581(15) 0.0442(13) 0.0474(13) 0.0003(10) 0.0231(11) -0.0009(11)
 C22 0.0492(12) 0.0348(11) 0.0291(9) -0.0017(8) 0.0144(9) 0.0046(9)
 C23 0.087(2) 0.0389(12) 0.0344(11) -0.0026(9) 0.0009(12) 0.0033(13)
 C24 0.167(4) 0.0311(13) 0.0633(19) 0.0048(13) 0.001(2) 0.0351(19)
 C25 0.0211(8) 0.0330(10) 0.0341(9) 0.0019(8) 0.0043(7) -0.0009(7)
 C26 0.0252(9) 0.0264(9) 0.0250(8) 0.0003(7) 0.0037(7) -0.0015(7)
 C27 0.0298(9) 0.0300(9) 0.0299(9) 0.0021(7) 0.0065(7) -0.0063(7)
 C28 0.0388(11) 0.0239(9) 0.0298(9) 0.0016(7) 0.0068(8) -0.0054(7)
 C29 0.0344(10) 0.0234(8) 0.0231(8) -0.0007(6) 0.0058(7) 0.0008(7)
 C30 0.0261(8) 0.0230(8) 0.0203(7) -0.0008(6) 0.0040(6) 0.0019(6)
 C31 0.0269(9) 0.0232(8) 0.0216(8) 0.0006(6) 0.0032(6) 0.0021(7)
 C32 0.0434(11) 0.0210(9) 0.0369(10) 0.0030(7) 0.0090(8) 0.0038(8)
 C33 0.0391(11) 0.0261(9) 0.0361(10) 0.0037(8) 0.0077(8) 0.0112(8)
 C34 0.0312(9) 0.0268(9) 0.0278(8) 0.0015(7) 0.0049(7) 0.0060(7)
 C35 0.0277(10) 0.0360(11) 0.0448(11) 0.0046(9) 0.0040(8) 0.0101(8)
 C36 0.0219(9) 0.0389(11) 0.0508(12) 0.0052(9) 0.0028(8) 0.0032(8)
 C37 0.0245(9) 0.0288(9) 0.0355(10) 0.0023(7) 0.0026(7) 0.0007(7)
 C38 0.0226(9) 0.0318(10) 0.0473(11) 0.0004(8) 0.0056(8) -0.0037(7)
 C39 0.0272(10) 0.0272(10) 0.0657(14) 0.0042(9) 0.0134(9) -0.0018(8)
 C40 0.0560(15) 0.0337(12) 0.0699(17) -0.0013(11) 0.0212(13) -0.0060(10)
 C41 0.101(3) 0.0331(13) 0.091(2) -0.0117(14) 0.039(2) -0.0122(14)
 C42 0.109(3) 0.0262(12) 0.115(3) 0.0035(16) 0.053(2) -0.0012(15)
 C43 0.0645(18) 0.0324(12) 0.096(2) 0.0189(14) 0.0328(16) 0.0066(12)
 C44 0.0333(11) 0.0310(11) 0.0746(17) 0.0130(11) 0.0152(11) 0.0028(9)
 C45 0.081(2) 0.0549(17) 0.071(2) 0.0315(15) -0.0003(17) -0.0040(15)
 C46 0.060(3) 0.074(3) 0.058(2) 0.020(2) 0.021(2) 0.006(2)
 C47 0.103(4) 0.094(4) 0.041(2) -0.005(2) 0.029(2) 0.010(3)
 C48 0.181(5) 0.097(3) 0.0392(16) 0.0058(17) 0.018(2) 0.057(3)
 C49 0.229(6) 0.068(2) 0.0403(16) 0.0093(15) 0.037(3) 0.030(3)
 C50 0.195(6) 0.108(4) 0.053(2) 0.006(2) 0.040(3) 0.046(4)
 C51 0.064(5) 0.085(6) 0.046(4) 0.020(4) 0.001(3) -0.008(5)
 C51A 0.078(5) 0.096(5) 0.048(3) 0.015(3) -0.013(3) 0.003(4)
 C52 0.0622(18) 0.078(2) 0.0527(16) 0.0313(15) 0.0034(13) 0.0212(15)
 C53 0.0273(10) 0.0356(11) 0.0604(14) 0.0138(10) 0.0072(9) 0.0037(8)
 C54 0.0388(13) 0.0416(13) 0.087(2) 0.0264(13) 0.0120(13) 0.0115(10)
 C55 0.0400(13) 0.0347(12) 0.117(3) 0.0072(15) 0.0246(15) 0.0108(10)
 C56 0.0397(13) 0.0402(13) 0.097(2) -0.0112(14) 0.0218(14) 0.0030(10)
 C57 0.0310(11) 0.0422(12) 0.0630(15) -0.0042(11) 0.0101(10) 0.0015(9)
 C58 0.0217(9) 0.0302(10) 0.0530(12) 0.0050(9) 0.0061(8) 0.0006(7)
 C46A 0.085(12) 0.068(10) 0.042(7) 0.034(7) -0.004(8) 0.002(9)
 C47A 0.080(13) 0.14(2) 0.038(8) 0.012(9) 0.016(9) -0.016(13)
 O4A 0.126(15) 0.096(12) 0.045(6) 0.013(8) 0.017(7) 0.048(11)
 O6A 0.138(9) 0.071(5) 0.042(3) -0.003(3) 0.024(4) -0.013(5)

_geom_special_details
;
 All esds (except the esd in the dihedral angle between two l.s. planes)
 are estimated using the full covariance matrix.  The cell esds are taken
 into account individually in the estimation of esds in distances, angles
 and torsion angles; correlations between esds in cell parameters are only
 used when they are defined by crystal symmetry.  An approximate (isotropic)
 treatment of cell esds is used for estimating esds involving l.s. planes.
;
loop_
  _geom_bond_atom_site_label_1
  _geom_bond_atom_site_label_2
  _geom_bond_distance
  _geom_bond_site_symmetry_2
  _geom_bond_publ_flag
 P1 F1 1.577(2) . ?
 P1 F2 1.583(2) . ?
 P1 F3 1.587(2) . ?
 P1 F4 1.574(2) . ?
 P1 F5 1.578(2) . ?
 P1 F6 1.577(2) . ?
 O1 C2 1.370(3) . ?
 O1 C23 1.421(3) . ?
 O2 C4 1.374(3) . ?
 O2 C24 1.434(4) . ?
 O3 C44 1.376(3) . ?
 O3 C45 1.449(3) . ?
 O4 C46 1.402(6) . ?
 O4 C47 1.441(5) . ?
 O5 C48 1.408(6) . ?
 O5 C49 1.423(6) . ?
 O6 C50 1.512(7) . ?
 O6 C51 1.094(10) . ?
 O7 C52 1.443(3) . ?
 O7 C53 1.374(3) . ?
 N1 H1A 0.9100 . ?
 N1 H1B 0.9100 . ?
 N1 C7 1.491(2) . ?
 N1 C8 1.508(3) . ?
 N2 C25 1.272(3) . ?
 N2 C58 1.423(3) . ?
 N3 C26 1.338(2) . ?
 N3 C30 1.355(2) . ?
 N4 C31 1.353(2) . ?
 N4 C37 1.333(2) . ?
 N5 C38 1.278(3) . ?
 N5 C39 1.425(3) . ?
 C1 H1 0.9500 . ?
 C1 C2 1.401(3) . ?
 C1 C6 1.388(3) . ?
 C2 C3 1.387(3) . ?
 C3 H3 0.9500 . ?
 C3 C4 1.400(3) . ?
 C4 C5 1.395(3) . ?
 C5 H5 0.9500 . ?
 C5 C6 1.405(3) . ?
 C6 C7 1.514(3) . ?
 C7 H7A 0.9900 . ?
 C7 H7B 0.9900 . ?
 C8 H8A 0.9900 . ?
 C8 H8B 0.9900 . ?
 C8 C9 1.524(3) . ?
 C9 C10 1.411(3) . ?
 C9 C22 1.417(3) . ?
 C10 C11 1.443(3) . ?
 C10 C15 1.446(3) . ?
 C11 H11 0.9500 . ?
 C11 C12 1.365(4) . ?
 C12 H12 0.9500 . ?
 C12 C13 1.419(4) . ?
 C13 H13 0.9500 . ?
 C13 C14 1.347(4) . ?
 C14 H14 0.9500 . ?
 C14 C15 1.434(3) . ?
 C15 C16 1.391(4) . ?
 C16 H16 0.9500 . ?
 C16 C17 1.394(3) . ?
 C17 C18 1.431(4) . ?
 C17 C22 1.447(3) . ?
 C18 H18 0.9500 . ?
 C18 C19 1.357(5) . ?
 C19 H19 0.9500 . ?
 C19 C20 1.421(5) . ?
 C20 H20 0.9500 . ?
 C20 C21 1.351(4) . ?
 C21 H21 0.9500 . ?
 C21 C22 1.439(3) . ?
 C23 H23A 0.9800 . ?
 C23 H23B 0.9800 . ?
 C23 H23C 0.9800 . ?
 C24 H24A 0.9800 . ?
 C24 H24B 0.9800 . ?
 C24 H24C 0.9800 . ?
 C25 H25 0.9500 . ?
 C25 C26 1.481(3) . ?
 C26 C27 1.410(3) . ?
 C27 H27 0.9500 . ?
 C27 C28 1.375(3) . ?
 C28 H28 0.9500 . ?
 C28 C29 1.412(3) . ?
 C29 C30 1.421(2) . ?
 C29 C32 1.436(3) . ?
 C30 C31 1.458(3) . ?
 C31 C34 1.421(3) . ?
 C32 H32 0.9500 . ?
 C32 C33 1.358(3) . ?
 C33 H33 0.9500 . ?
 C33 C34 1.440(3) . ?
 C34 C35 1.407(3) . ?
 C35 H35 0.9500 . ?
 C35 C36 1.370(3) . ?
 C36 H36 0.9500 . ?
 C36 C37 1.412(3) . ?
 C37 C38 1.481(3) . ?
 C38 H38 0.9500 . ?
 C39 C40 1.393(4) . ?
 C39 C44 1.405(4) . ?
 C40 H40 0.9500 . ?
 C40 C41 1.395(4) . ?
 C41 H41 0.9500 . ?
 C41 C42 1.370(5) . ?
 C42 H42 0.9500 . ?
 C42 C43 1.385(5) . ?
 C43 H43 0.9500 . ?
 C43 C44 1.403(3) . ?
 C45 C46 1.591(7) . ?
 C45 C46A 1.298(18) . ?
 C47 C48 1.433(8) . ?
 C48 H48A 0.9900 . ?
 C48 H48B 0.9900 . ?
 C49 H49A 0.9900 . ?
 C49 H49B 0.9900 . ?
 C49 C50 1.458(8) . ?
 C50 O6A 1.436(10) . ?
 C51 C52 1.522(11) . ?
 C51A C52 1.532(10) . ?
 C51A O6A 0.962(10) . ?
 C53 C54 1.398(3) . ?
 C53 C58 1.402(3) . ?
 C54 H54 0.9500 . ?
 C54 C55 1.397(5) . ?
 C55 H55 0.9500 . ?
 C55 C56 1.375(5) . ?
 C56 H56 0.9500 . ?
 C56 C57 1.398(3) . ?
 C57 H57 0.9500 . ?
 C57 C58 1.397(3) . ?
 C46A O4A 1.54(2) . ?
 C47A O4A 1.55(3) . ?

loop_
  _geom_angle_atom_site_label_1
  _geom_angle_atom_site_label_2
  _geom_angle_atom_site_label_3
  _geom_angle
  _geom_angle_site_symmetry_1
  _geom_angle_site_symmetry_3
  _geom_angle_publ_flag
 F1 P1 F2 91.31(16) . . ?
 F1 P1 F3 90.28(15) . . ?
 F1 P1 F5 87.85(17) . . ?
 F1 P1 F6 87.83(15) . . ?
 F2 P1 F3 91.05(15) . . ?
 F4 P1 F1 177.97(17) . . ?
 F4 P1 F2 88.58(15) . . ?
 F4 P1 F3 87.70(17) . . ?
 F4 P1 F5 92.26(16) . . ?
 F4 P1 F6 94.19(17) . . ?
 F5 P1 F2 179.14(16) . . ?
 F5 P1 F3 88.79(16) . . ?
 F6 P1 F2 89.10(14) . . ?
 F6 P1 F3 178.11(16) . . ?
 F6 P1 F5 91.04(15) . . ?
 C2 O1 C23 118.73(17) . . ?
 C4 O2 C24 116.1(2) . . ?
 C44 O3 C45 117.9(2) . . ?
 C46 O4 C47 110.1(4) . . ?
 C48 O5 C49 113.3(4) . . ?
 C51 O6 C50 122.3(6) . . ?
 C53 O7 C52 117.0(2) . . ?
 H1A N1 H1B 107.9 . . ?
 C7 N1 H1A 109.2 . . ?
 C7 N1 H1B 109.2 . . ?
 C7 N1 C8 112.23(15) . . ?
 C8 N1 H1A 109.2 . . ?
 C8 N1 H1B 109.2 . . ?
 C25 N2 C58 118.78(17) . . ?
 C26 N3 C30 117.34(16) . . ?
 C37 N4 C31 118.14(16) . . ?
 C38 N5 C39 118.33(18) . . ?
 C2 C1 H1 120.2 . . ?
 C6 C1 H1 120.2 . . ?
 C6 C1 C2 119.62(18) . . ?
 O1 C2 C1 115.31(17) . . ?
 O1 C2 C3 123.85(19) . . ?
 C3 C2 C1 120.84(19) . . ?
 C2 C3 H3 120.5 . . ?
 C2 C3 C4 119.02(19) . . ?
 C4 C3 H3 120.5 . . ?
 O2 C4 C3 114.2(2) . . ?
 O2 C4 C5 124.7(2) . . ?
 C5 C4 C3 121.07(19) . . ?
 C4 C5 H5 120.5 . . ?
 C4 C5 C6 119.0(2) . . ?
 C6 C5 H5 120.5 . . ?
 C1 C6 C5 120.44(18) . . ?
 C1 C6 C7 122.43(17) . . ?
 C5 C6 C7 117.12(18) . . ?
 N1 C7 C6 112.96(15) . . ?
 N1 C7 H7A 109.0 . . ?
 N1 C7 H7B 109.0 . . ?
 C6 C7 H7A 109.0 . . ?
 C6 C7 H7B 109.0 . . ?
 H7A C7 H7B 107.8 . . ?
 N1 C8 H8A 109.3 . . ?
 N1 C8 H8B 109.3 . . ?
 N1 C8 C9 111.40(16) . . ?
 H8A C8 H8B 108.0 . . ?
 C9 C8 H8A 109.3 . . ?
 C9 C8 H8B 109.3 . . ?
 C10 C9 C8 120.2(2) . . ?
 C10 C9 C22 120.11(19) . . ?
 C22 C9 C8 119.66(19) . . ?
 C9 C10 C11 123.5(2) . . ?
 C9 C10 C15 119.6(2) . . ?
 C11 C10 C15 116.9(2) . . ?
 C10 C11 H11 119.5 . . ?
 C12 C11 C10 120.9(2) . . ?
 C12 C11 H11 119.5 . . ?
 C11 C12 H12 119.2 . . ?
 C11 C12 C13 121.5(3) . . ?
 C13 C12 H12 119.2 . . ?
 C12 C13 H13 120.1 . . ?
 C14 C13 C12 119.8(2) . . ?
 C14 C13 H13 120.1 . . ?
 C13 C14 H14 119.3 . . ?
 C13 C14 C15 121.5(3) . . ?
 C15 C14 H14 119.3 . . ?
 C14 C15 C10 119.4(2) . . ?
 C16 C15 C10 119.3(2) . . ?
 C16 C15 C14 121.3(2) . . ?
 C15 C16 H16 118.9 . . ?
 C15 C16 C17 122.2(2) . . ?
 C17 C16 H16 118.9 . . ?
 C16 C17 C18 121.6(2) . . ?
 C16 C17 C22 119.0(2) . . ?
 C18 C17 C22 119.3(2) . . ?
 C17 C18 H18 119.5 . . ?
 C19 C18 C17 121.0(3) . . ?
 C19 C18 H18 119.5 . . ?
 C18 C19 H19 120.0 . . ?
 C18 C19 C20 119.9(3) . . ?
 C20 C19 H19 120.0 . . ?
 C19 C20 H20 119.3 . . ?
 C21 C20 C19 121.4(3) . . ?
 C21 C20 H20 119.3 . . ?
 C20 C21 H21 119.3 . . ?
 C20 C21 C22 121.4(3) . . ?
 C22 C21 H21 119.3 . . ?
 C9 C22 C17 119.7(2) . . ?
 C9 C22 C21 123.3(2) . . ?
 C21 C22 C17 117.0(2) . . ?
 O1 C23 H23A 109.5 . . ?
 O1 C23 H23B 109.5 . . ?
 O1 C23 H23C 109.5 . . ?
 H23A C23 H23B 109.5 . . ?
 H23A C23 H23C 109.5 . . ?
 H23B C23 H23C 109.5 . . ?
 O2 C24 H24A 109.5 . . ?
 O2 C24 H24B 109.5 . . ?
 O2 C24 H24C 109.5 . . ?
 H24A C24 H24B 109.5 . . ?
 H24A C24 H24C 109.5 . . ?
 H24B C24 H24C 109.5 . . ?
 N2 C25 H25 119.5 . . ?
 N2 C25 C26 120.94(17) . . ?
 C26 C25 H25 119.5 . . ?
 N3 C26 C25 115.55(16) . . ?
 N3 C26 C27 123.91(17) . . ?
 C27 C26 C25 120.54(17) . . ?
 C26 C27 H27 120.7 . . ?
 C28 C27 C26 118.66(18) . . ?
 C28 C27 H27 120.7 . . ?
 C27 C28 H28 120.3 . . ?
 C27 C28 C29 119.31(17) . . ?
 C29 C28 H28 120.3 . . ?
 C28 C29 C30 117.70(17) . . ?
 C28 C29 C32 122.39(17) . . ?
 C30 C29 C32 119.91(18) . . ?
 N3 C30 C29 122.98(17) . . ?
 N3 C30 C31 117.90(16) . . ?
 C29 C30 C31 119.09(16) . . ?
 N4 C31 C30 118.26(15) . . ?
 N4 C31 C34 122.73(17) . . ?
 C34 C31 C30 118.96(16) . . ?
 C29 C32 H32 119.5 . . ?
 C33 C32 C29 121.00(18) . . ?
 C33 C32 H32 119.5 . . ?
 C32 C33 H33 119.5 . . ?
 C32 C33 C34 120.93(18) . . ?
 C34 C33 H33 119.5 . . ?
 C31 C34 C33 119.87(18) . . ?
 C35 C34 C31 117.59(18) . . ?
 C35 C34 C33 122.51(18) . . ?
 C34 C35 H35 120.3 . . ?
 C36 C35 C34 119.31(18) . . ?
 C36 C35 H35 120.3 . . ?
 C35 C36 H36 120.3 . . ?
 C35 C36 C37 119.34(19) . . ?
 C37 C36 H36 120.3 . . ?
 N4 C37 C36 122.79(18) . . ?
 N4 C37 C38 117.16(17) . . ?
 C36 C37 C38 120.05(18) . . ?
 N5 C38 C37 120.71(18) . . ?
 N5 C38 H38 119.6 . . ?
 C37 C38 H38 119.6 . . ?
 C40 C39 N5 120.4(2) . . ?
 C40 C39 C44 119.9(2) . . ?
 C44 C39 N5 119.6(2) . . ?
 C39 C40 H40 119.9 . . ?
 C39 C40 C41 120.2(3) . . ?
 C41 C40 H40 119.9 . . ?
 C40 C41 H41 120.3 . . ?
 C42 C41 C40 119.5(3) . . ?
 C42 C41 H41 120.3 . . ?
 C41 C42 H42 119.1 . . ?
 C41 C42 C43 121.7(3) . . ?
 C43 C42 H42 119.1 . . ?
 C42 C43 H43 120.3 . . ?
 C42 C43 C44 119.4(3) . . ?
 C44 C43 H43 120.3 . . ?
 O3 C44 C39 116.4(2) . . ?
 O3 C44 C43 124.3(3) . . ?
 C43 C44 C39 119.2(3) . . ?
 O3 C45 C46 108.8(3) . . ?
 C46A C45 O3 107.5(6) . . ?
 O4 C46 C45 109.7(4) . . ?
 C48 C47 O4 109.2(4) . . ?
 O5 C48 C47 109.6(4) . . ?
 O5 C48 H48A 109.8 . . ?
 O5 C48 H48B 109.8 . . ?
 C47 C48 H48A 109.8 . . ?
 C47 C48 H48B 109.8 . . ?
 H48A C48 H48B 108.2 . . ?
 O5 C49 H49A 109.6 . . ?
 O5 C49 H49B 109.6 . . ?
 O5 C49 C50 110.2(4) . . ?
 H49A C49 H49B 108.1 . . ?
 C50 C49 H49A 109.6 . . ?
 C50 C49 H49B 109.6 . . ?
 C49 C50 O6 97.2(5) . . ?
 O6A C50 C49 127.3(6) . . ?
 O6 C51 C52 132.5(7) . . ?
 O6A C51A C52 138.7(10) . . ?
 O7 C52 C51 110.8(4) . . ?
 O7 C52 C51A 106.5(3) . . ?
 O7 C53 C54 125.0(2) . . ?
 O7 C53 C58 115.73(19) . . ?
 C54 C53 C58 119.3(2) . . ?
 C53 C54 H54 120.0 . . ?
 C55 C54 C53 120.0(3) . . ?
 C55 C54 H54 120.0 . . ?
 C54 C55 H55 119.6 . . ?
 C56 C55 C54 120.8(2) . . ?
 C56 C55 H55 119.6 . . ?
 C55 C56 H56 120.1 . . ?
 C55 C56 C57 119.8(3) . . ?
 C57 C56 H56 120.1 . . ?
 C56 C57 H57 119.9 . . ?
 C58 C57 C56 120.1(3) . . ?
 C58 C57 H57 119.9 . . ?
 C53 C58 N2 118.9(2) . . ?
 C57 C58 N2 120.7(2) . . ?
 C57 C58 C53 120.0(2) . . ?
 C45 C46A O4A 93.5(14) . . ?
 C46A O4A C47A 110.3(16) . . ?
 C51A O6A C50 137.3(9) . . ?

_smtbx_masks_special_details       ?
loop_
  _smtbx_masks_void_nr
  _smtbx_masks_void_average_x
  _smtbx_masks_void_average_y
  _smtbx_masks_void_average_z
  _smtbx_masks_void_volume
  _smtbx_masks_void_count_electrons
  _smtbx_masks_void_content
 1 0.148 0.227 0.408 16.6 0.5 ?
 2 0.000 0.500 0.000 112.2 33.0 Dichloromethane
 3 -0.148 0.773 0.592 16.6 0.5 ?
 4 0.500 0.000 0.500 112.2 33.0 Dichloromethane
 5 0.352 0.727 0.092 16.6 0.5 Dichloromethane
 6 0.648 0.273 0.908 16.6 0.5 ?

_shelx_res_file
;
TITL sam023_a.res in P2(1)/n
    sam023.res
    created by SHELXL-2018/3 at 11:22:50 on 16-Jul-2020
REM Old TITL SAM023 in P2(1)/n
REM SHELXT solution in P2(1)/n
REM R1 0.257, Rweak 0.012, Alpha 0.037, Orientation as input
REM Formula found by SHELXT: C61 N7 O3 F6 P
CELL 0.71073 11.3353 27.6672 17.5181 90 98.027 90
ZERR 4 0.0038 0.0092 0.0058 0 0.007 0
LATT 1
SYMM 0.5-X,0.5+Y,0.5-Z
SFAC C H F N O P
UNIT 232 224 24 20 28 4

L.S. 8
PLAN  10
SIZE 0.3 0.3 0.2
TEMP -100.15
BOND $H
list 4
ABIN
fmap 2 53
acta
REM <olex2.extras>
REM <HklSrc "%.\\SAM023.hkl">
REM </olex2.extras>

WGHT    0.106100    3.962900
FVAR       0.18046
P1    6    0.939195    0.641260    0.622057    11.00000    0.05003    0.04448 =
         0.05279   -0.00737    0.00764    0.00027
F1    3    0.939360    0.589793    0.583437    11.00000    0.10919    0.07431 =
         0.14225   -0.05036    0.00025    0.01524
F2    3    0.853487    0.622908    0.679944    11.00000    0.09359    0.12847 =
         0.07795   -0.00133    0.02585   -0.03752
F3    3    1.053018    0.626954    0.681109    11.00000    0.07176    0.15469 =
         0.09414   -0.00228   -0.02205    0.00269
F4    3    0.942798    0.692055    0.662811    11.00000    0.16877    0.05748 =
         0.13570   -0.03407    0.04521   -0.01230
F5    3    1.024957    0.658752    0.563970    11.00000    0.10012    0.15681 =
         0.08823    0.01043    0.04218   -0.02462
F6    3    0.826307    0.653807    0.562038    11.00000    0.07703    0.15641 =
         0.08096    0.01328    0.00127    0.04230
O1    5    0.546741    0.668748    0.548597    11.00000    0.07357    0.02522 =
         0.03441    0.00017    0.00384   -0.00395
O2    5    0.454251    0.819275    0.422521    11.00000    0.12052    0.02623 =
         0.05256   -0.00279    0.00337    0.02393
O3    5    0.727811    0.711250    0.203852    11.00000    0.05454    0.04036 =
         0.06473    0.01937    0.00003   -0.00303
PART 1
O4    5    0.643838    0.664536    0.055224    10.80000    0.07495    0.06841 =
         0.04612    0.00532    0.01934    0.00696
PART 0
O5    5    0.466950    0.600911   -0.012155    11.00000    0.17041    0.08010 =
         0.05916    0.01069    0.02687    0.05177
PART 1
O6    5    0.282078    0.604588    0.055201    10.60000    0.12065    0.06840 =
         0.03835    0.00132   -0.00675    0.03371
PART 0
O7    5    0.182629    0.633897    0.189083    11.00000    0.05019    0.05142 =
         0.04653    0.01776    0.00262    0.01631

N1    4    0.524373    0.621378    0.272224    11.00000    0.03059    0.02623 =
         0.02886    0.00013    0.00595    0.00259
AFIX  23
H1A   2    0.482361    0.602518    0.301391    11.00000   -1.20000
H1B   2    0.600869    0.622883    0.296180    11.00000   -1.20000
AFIX   0

N2    4    0.281683    0.601737    0.328378    11.00000    0.02469    0.03038 =
         0.03846    0.00359    0.00354    0.00283
N3    4    0.466645    0.540604    0.381554    11.00000    0.02382    0.02387 =
         0.02380    0.00069    0.00325    0.00067
N4    4    0.698390    0.569129    0.385825    11.00000    0.02368    0.02483 =
         0.02938    0.00043    0.00310    0.00001
N5    4    0.756506    0.661727    0.339593    11.00000    0.02575    0.02681 =
         0.04943    0.00465    0.00773   -0.00209
C1    1    0.507500    0.670904    0.413818    11.00000    0.03198    0.02109 =
         0.03856   -0.00173    0.00809   -0.00159
AFIX  43
H1    2    0.519396    0.636916    0.413723    11.00000   -1.20000
AFIX   0
C2    1    0.517270    0.696243    0.483660    11.00000    0.03365    0.02568 =
         0.03576   -0.00058    0.00700   -0.00284
C3    1    0.497686    0.745711    0.484771    11.00000    0.04378    0.02729 =
         0.04036   -0.00594    0.00670    0.00197
AFIX  43
H3    2    0.503220    0.762629    0.532327    11.00000   -1.20000
AFIX   0
C4    1    0.469648    0.770335    0.414788    11.00000    0.05316    0.02443 =
         0.04814   -0.00243    0.00517    0.01031
C5    1    0.461087    0.745921    0.344567    11.00000    0.04271    0.02864 =
         0.04044    0.00219    0.00429    0.00937
AFIX  43
H5    2    0.442523    0.762959    0.297334    11.00000   -1.20000
AFIX   0
C6    1    0.480330    0.695755    0.344741    11.00000    0.02231    0.02642 =
         0.03629   -0.00071    0.00597    0.00011
C7    1    0.472465    0.670968    0.267141    11.00000    0.02872    0.02508 =
         0.03431    0.00252    0.00534    0.00299
AFIX  23
H7A   2    0.387798    0.668984    0.243966    11.00000   -1.20000
H7B   2    0.514856    0.690801    0.232568    11.00000   -1.20000
AFIX   0
C8    1    0.522762    0.598454    0.194002    11.00000    0.04911    0.03320 =
         0.02807   -0.00109    0.00752    0.00777
AFIX  23
H8A   2    0.565918    0.619487    0.161492    11.00000   -1.20000
H8B   2    0.439351    0.595496    0.168698    11.00000   -1.20000
AFIX   0
C9    1    0.580528    0.548618    0.200248    11.00000    0.04720    0.03133 =
         0.02423   -0.00149    0.00937    0.00639
C10   1    0.510192    0.506922    0.204919    11.00000    0.04570    0.03702 =
         0.02087   -0.00470    0.00616    0.00252
C11   1    0.382165    0.508046    0.200551    11.00000    0.04902    0.05251 =
         0.03425   -0.00685    0.00695    0.00233
AFIX  43
H11   2    0.341316    0.538007    0.192755    11.00000   -1.20000
AFIX   0
C12   1    0.318908    0.466679    0.207459    11.00000    0.05108    0.07138 =
         0.04185   -0.01054    0.00809   -0.01397
AFIX  43
H12   2    0.234704    0.468445    0.204573    11.00000   -1.20000
AFIX   0
C13   1    0.376047    0.421080    0.218856    11.00000    0.07316    0.05494 =
         0.04002   -0.00892    0.00942   -0.02342
AFIX  43
H13   2    0.330292    0.392753    0.223663    11.00000   -1.20000
AFIX   0
C14   1    0.495381    0.418106    0.222832    11.00000    0.07567    0.03633 =
         0.03496   -0.00450    0.00975   -0.00744
AFIX  43
H14   2    0.532917    0.387441    0.230336    11.00000   -1.20000
AFIX   0
C15   1    0.566994    0.460172    0.215994    11.00000    0.05766    0.03303 =
         0.02422   -0.00592    0.00892   -0.00004
C16   1    0.690357    0.457013    0.221136    11.00000    0.05985    0.03224 =
         0.03239   -0.00348    0.01054    0.01093
AFIX  43
H16   2    0.727343    0.426316    0.229848    11.00000   -1.20000
AFIX   0
C17   1    0.761478    0.497418    0.213923    11.00000    0.04811    0.04014 =
         0.03365   -0.00435    0.01417    0.00953
C18   1    0.888198    0.493648    0.218684    11.00000    0.05263    0.06118 =
         0.06268   -0.00580    0.02145    0.01735
AFIX  43
H18   2    0.925169    0.462899    0.226631    11.00000   -1.20000
AFIX   0
C19   1    0.956345    0.533336    0.212019    11.00000    0.04856    0.08183 =
         0.08478   -0.00792    0.03142    0.00298
AFIX  43
H19   2    1.040346    0.530251    0.215091    11.00000   -1.20000
AFIX   0
C20   1    0.901929    0.579512    0.200438    11.00000    0.06146    0.06438 =
         0.07170   -0.00295    0.03278   -0.01249
AFIX  43
H20   2    0.950319    0.607059    0.195490    11.00000   -1.20000
AFIX   0
C21   1    0.782816    0.585050    0.196321    11.00000    0.05805    0.04421 =
         0.04738    0.00026    0.02309   -0.00091
AFIX  43
H21   2    0.749276    0.616460    0.189040    11.00000   -1.20000
AFIX   0
C22   1    0.705631    0.544394    0.202726    11.00000    0.04920    0.03483 =
         0.02913   -0.00168    0.01435    0.00455
C23   1    0.577563    0.692502    0.620550    11.00000    0.08660    0.03893 =
         0.03443   -0.00264    0.00088    0.00332
AFIX 137
H23A  2    0.638144    0.717156    0.615694    11.00000   -1.50000
H23B  2    0.609227    0.668839    0.659760    11.00000   -1.50000
H23C  2    0.506571    0.707890    0.635812    11.00000   -1.50000
AFIX   0
C24   1    0.432444    0.846402    0.352185    11.00000    0.16688    0.03114 =
         0.06327    0.00477    0.00110    0.03512
AFIX 137
H24A  2    0.498578    0.841614    0.322428    11.00000   -1.50000
H24B  2    0.425733    0.880806    0.364174    11.00000   -1.50000
H24C  2    0.358123    0.835319    0.321899    11.00000   -1.50000
AFIX   0

C25   1    0.263361    0.565432    0.369711    11.00000    0.02113    0.03297 =
         0.03414    0.00187    0.00426   -0.00094
AFIX  43
H25   2    0.190050    0.562802    0.389868    11.00000   -1.20000
AFIX   0
C26   1    0.354675    0.527214    0.386852    11.00000    0.02522    0.02645 =
         0.02497    0.00030    0.00366   -0.00146
C27   1    0.322170    0.480412    0.407968    11.00000    0.02983    0.03001 =
         0.02990    0.00214    0.00647   -0.00634
AFIX  43
H27   2    0.241696    0.473036    0.412803    11.00000   -1.20000
AFIX   0
C28   1    0.409316    0.445648    0.421428    11.00000    0.03883    0.02389 =
         0.02975    0.00157    0.00681   -0.00538
AFIX  43
H28   2    0.389350    0.413527    0.433891    11.00000   -1.20000
AFIX   0
C29   1    0.528798    0.458197    0.416528    11.00000    0.03441    0.02338 =
         0.02306   -0.00072    0.00583    0.00081
C30   1    0.553034    0.506818    0.397773    11.00000    0.02609    0.02299 =
         0.02027   -0.00084    0.00396    0.00193
C31   1    0.676361    0.521884    0.398058    11.00000    0.02687    0.02318 =
         0.02163    0.00057    0.00322    0.00214
C32   1    0.624341    0.423817    0.429714    11.00000    0.04338    0.02105 =
         0.03687    0.00303    0.00897    0.00377
AFIX  43
H32   2    0.607179    0.391096    0.440384    11.00000   -1.20000
AFIX   0
C33   1    0.738836    0.437356    0.427167    11.00000    0.03914    0.02613 =
         0.03611    0.00366    0.00775    0.01116
AFIX  43
H33   2    0.800276    0.413759    0.434218    11.00000   -1.20000
AFIX   0
C34   1    0.768466    0.486978    0.413928    11.00000    0.03116    0.02684 =
         0.02776    0.00151    0.00487    0.00601
C35   1    0.886871    0.503198    0.418327    11.00000    0.02770    0.03603 =
         0.04475    0.00462    0.00398    0.01011
AFIX  43
H35   2    0.951097    0.480927    0.427339    11.00000   -1.20000
AFIX   0
C36   1    0.908564    0.551434    0.409481    11.00000    0.02189    0.03894 =
         0.05080    0.00520    0.00280    0.00322
AFIX  43
H36   2    0.988038    0.563197    0.414974    11.00000   -1.20000
AFIX   0
C37   1    0.811617    0.583504    0.392114    11.00000    0.02451    0.02875 =
         0.03548    0.00227    0.00259    0.00070
C38   1    0.833476    0.635647    0.381124    11.00000    0.02259    0.03176 =
         0.04728    0.00040    0.00558   -0.00374
AFIX  43
H38   2    0.905471    0.649866    0.405197    11.00000   -1.20000
AFIX   0
C39   1    0.774067    0.712718    0.339614    11.00000    0.02718    0.02724 =
         0.06566    0.00415    0.01338   -0.00178
C40   1    0.804962    0.737496    0.408760    11.00000    0.05605    0.03366 =
         0.06987   -0.00131    0.02117   -0.00601
AFIX  43
H40   2    0.818701    0.720138    0.455956    11.00000   -1.20000
AFIX   0
C41   1    0.815775    0.787718    0.408879    11.00000    0.10097    0.03307 =
         0.09110   -0.01174    0.03948   -0.01218
AFIX  43
H41   2    0.839823    0.804548    0.455738    11.00000   -1.20000
AFIX   0
C42   1    0.791423    0.812581    0.340843    11.00000    0.10877    0.02615 =
         0.11470    0.00350    0.05315   -0.00118
AFIX  43
H42   2    0.796888    0.846846    0.341405    11.00000   -1.20000
AFIX   0
C43   1    0.759050    0.789053    0.271283    11.00000    0.06449    0.03239 =
         0.09628    0.01887    0.03282    0.00660
AFIX  43
H43   2    0.741736    0.807042    0.224879    11.00000   -1.20000
AFIX   0
C44   1    0.752051    0.738437    0.269944    11.00000    0.03334    0.03097 =
         0.07461    0.01300    0.01519    0.00284
C45   1    0.709852    0.736506    0.130717    11.00000    0.08064    0.05494 =
         0.07128    0.03155   -0.00030   -0.00396
PART 1
C46   1    0.733283    0.699913    0.064425    10.80000    0.05998    0.07367 =
         0.05758    0.02029    0.02141    0.00644
C47   1    0.652627    0.636169   -0.012720    10.80000    0.10311    0.09398 =
         0.04063   -0.00513    0.02906    0.01007
PART 0
C48   1    0.589800    0.591576   -0.007957    11.00000    0.18074    0.09691 =
         0.03921    0.00577    0.01786    0.05670
AFIX  23
H48A  2    0.604256    0.570032   -0.050813    11.00000   -1.20000
H48B  2    0.619022    0.575123    0.041245    11.00000   -1.20000
AFIX   0
C49   1    0.397521    0.558416   -0.007842    11.00000    0.22888    0.06765 =
         0.04027    0.00931    0.03726    0.03044
AFIX  23
H49A  2    0.423371    0.541629    0.041574    11.00000   -1.20000
H49B  2    0.409790    0.536221   -0.050359    11.00000   -1.20000
AFIX   0
C50   1    0.271654    0.570843   -0.013326    11.00000    0.19480    0.10827 =
         0.05256    0.00604    0.03971    0.04650
PART 1
C51   1    0.225785    0.636622    0.056464    10.40000    0.06438    0.08540 =
         0.04588    0.01957    0.00121   -0.00785
PART 0
PART 2
C51A  1    0.155894    0.613588    0.055506    10.60000    0.07845    0.09615 =
         0.04798    0.01527   -0.01281    0.00313
PART 0
C52   1    0.145823    0.654222    0.113656    11.00000    0.06223    0.07843 =
         0.05273    0.03126    0.00344    0.02122
C53   1    0.155447    0.659815    0.251246    11.00000    0.02732    0.03555 =
         0.06043    0.01382    0.00720    0.00370
C54   1    0.085778    0.701705    0.246610    11.00000    0.03876    0.04163 =
         0.08660    0.02643    0.01204    0.01147
AFIX  43
H54   2    0.053561    0.714321    0.197680    11.00000   -1.20000
AFIX   0
C55   1    0.063532    0.725008    0.313883    11.00000    0.04004    0.03475 =
         0.11672    0.00718    0.02463    0.01077
AFIX  43
H55   2    0.017347    0.753780    0.310328    11.00000   -1.20000
AFIX   0
C56   1    0.107708    0.706786    0.385197    11.00000    0.03967    0.04025 =
         0.09678   -0.01119    0.02177    0.00298
AFIX  43
H56   2    0.091686    0.722802    0.430607    11.00000   -1.20000
AFIX   0
C57   1    0.176298    0.664597    0.390637    11.00000    0.03100    0.04219 =
         0.06299   -0.00423    0.01012    0.00146
AFIX  43
H57   2    0.206500    0.651823    0.439835    11.00000   -1.20000
AFIX   0
C58   1    0.200510    0.641193    0.323892    11.00000    0.02169    0.03017 =
         0.05301    0.00497    0.00605    0.00058
PART 2
C46A  1    0.647609    0.708492    0.081052    10.20000    0.08459    0.06788 =
         0.04241    0.03444   -0.00380    0.00233
C47A  1    0.728706    0.646877   -0.005076    10.20000    0.07966    0.13913 =
         0.03778    0.01184    0.01614   -0.01633
O4A   5    0.754433    0.676205    0.070869    10.20000    0.12623    0.09581 =
         0.04529    0.01339    0.01731    0.04761
O6A   5    0.209289    0.587653    0.047499    10.40000    0.13824    0.07055 =
         0.04224   -0.00317    0.02421   -0.01327
HKLF 4


REM  sam023_a.res in P2(1)/n
REM wR2 = 0.2025, GooF = S = 1.035, Restrained GooF = 1.035 for all data
REM R1 = 0.0638 for 9895 Fo > 4sig(Fo) and 0.0825 for all 12949 data
REM 741 parameters refined using 0 restraints

END

WGHT      0.1061      3.9789

REM Highest difference peak  0.842,  deepest hole -0.504,  1-sigma level  0.065
Q1    1   0.5482  0.6201  0.0018  11.00000  0.05    0.84
Q2    1   0.9250  0.6982  0.5965  11.00000  0.05    0.64
Q3    1   0.4762  0.5768 -0.0004  11.00000  0.05    0.57
Q4    1   0.0606  0.6586  0.1055  11.00000  0.05    0.56
Q5    1   0.7718  0.7610  0.1325  11.00000  0.05    0.53
Q6    1   0.9982  0.6191  0.5494  11.00000  0.05    0.51
Q7    1   0.6823  0.6044  0.0054  11.00000  0.05    0.51
Q8    1   0.3437  0.5825 -0.0135  11.00000  0.05    0.48
Q9    1   0.9619  0.6868  0.5655  11.00000  0.05    0.47
Q10   1   0.6184  0.6582 -0.0585  11.00000  0.05    0.47
;
_shelx_res_checksum                36441
_shelx_hkl_file
;
   1   0   0   -0.20    0.10
   1   0   0   -0.10    0.10
  -1   0   0   -0.10    0.10
  -1   0   0   -0.20    0.10
  -1   0   0   -0.10    0.10
  -1   0   0   -0.20    0.10
  -1   0   0   -0.20    0.10
  -1   0   0   -0.30    0.10
  -1   0   0    0.00    0.10
   1   0   0   -0.10    0.10
   2   0   0  165.18    5.40
   2   0   0  158.78    5.40
   2   0   0  164.68    4.90
  -2   0   0  161.08    5.00
   2   0   0  157.08    5.00
  -2   0   0  163.78    4.90
  -2   0   0  167.28    5.40
   3   0   0    0.20    0.20
   3   0   0    0.00    0.10
   3   0   0    0.30    0.20
   3   0   0    0.00    0.20
   3   0   0   -0.10    0.20
  -3   0   0    0.20    0.20
  -3   0   0   -0.10    0.20
  -3   0   0    0.20    0.20
   4   0   0 1119.19   35.80
  -4   0   0 1159.48   35.80
   4   0   0 1134.29   36.00
  -4   0   0 1084.09   32.80
  -4   0   0 1090.29   33.50
   4   0   0 1055.19   32.80
   4   0   0 1100.59   33.50
  -5   0   0    0.20    0.30
   5   0   0    0.40    0.30
  -5   0   0    0.40    0.30
   5   0   0   -0.20    0.30
  -5   0   0    0.00    0.30
   5   0   0   -0.20    0.30
   5   0   0   -0.20    0.20
   5   0   0    0.20    0.20
  -6   0   0    5.90    0.50
   6   0   0    4.40    0.50
   6   0   0    6.70    0.40
  -6   0   0    5.10    0.60
   6   0   0    5.60    0.50
  -6   0   0    6.20    0.50
   6   0   0    6.80    0.50
  -7   0   0    0.20    0.20
  -7   0   0    1.10    0.40
   7   0   0    0.80    0.40
   7   0   0    0.70    0.30
   7   0   0    0.10    0.30
   7   0   0    0.80    0.40
  -7   0   0    1.10    0.40
   7   0   0    0.60    0.40
  -7   0   0    0.80    0.30
   8   0   0   30.00    1.20
  -8   0   0   29.30    1.30
  -8   0   0   29.00    1.30
   8   0   0   29.10    1.50
   8   0   0   28.90    1.30
   8   0   0   30.00    1.30
  -8   0   0   29.90    1.20
   9   0   0    0.40    0.50
   9   0   0    0.10    0.50
   9   0   0   -0.50    0.50
  -9   0   0    0.20    0.40
  -9   0   0    0.20    0.40
  10   0   0    5.40    0.80
  10   0   0    4.70    0.70
 -10   0   0    3.80    0.60
  10   0   0    3.70    0.80
 -10   0   0    4.40    0.70
  11   0   0    0.30    0.60
  11   0   0   -0.50    0.50
 -11   0   0    0.70    0.60
 -12   0   0    1.60    0.60
  12   0   0    0.60    0.70
  12   0   0    1.60    0.70
 -13   0   0   -0.20    0.60
  13   0   0   -0.20    0.70
  14   0   0    9.60    1.20
 -14   0   0    9.80    1.10
   0  -1   0    0.00    0.10
   0   1   0    0.00    0.10
   0   1   0    0.00    0.10
  -1  -1   0  267.57    7.90
   1  -1   0  256.37    8.10
   1  -1   0  266.87    8.60
   1  -1   0  260.77    7.90
  -1  -1   0  256.47    8.10
  -1  -1   0  276.07    8.70
   1  -1   0  274.67    8.70
   1   1   0  269.07    8.10
   1   1   0  263.47    7.90
  -1   1   0  257.97    8.10
   1   1   0  271.47    8.70
  -1   1   0  270.67    8.70
  -1   1   0  262.87    7.90
  -1   1   0  268.07    7.90
  -1   1   0  272.67    8.60
   1   1   0  270.07    8.60
  -1   1   0  261.07    8.10
   2  -1   0    3.10    0.30
  -2  -1   0    2.80    0.20
  -2  -1   0    3.00    0.30
  -2  -1   0    3.30    0.30
   2  -1   0    4.20    0.20
   2  -1   0    3.10    0.30
  -2  -1   0    3.00    0.30
   2  -1   0    3.20    0.30
  -2   1   0    4.10    0.30
   2   1   0    3.10    0.30
  -2   1   0    3.30    0.30
   2   1   0    3.20    0.30
   2   1   0    3.20    0.30
  -2   1   0    3.00    0.30
   2   1   0    3.10    0.20
  -3  -1   0   49.70    1.80
   3  -1   0   49.90    1.60
   3  -1   0   50.79    1.70
   3  -1   0   50.19    1.70
   3  -1   0   50.19    1.60
  -3  -1   0   51.29    1.60
   3  -1   0   51.19    1.80
  -3  -1   0   50.49    1.70
   3   1   0   51.09    1.60
  -3   1   0   48.20    1.70
  -3   1   0   49.40    1.60
  -3   1   0   50.89    1.80
   3   1   0   50.49    1.70
   3   1   0   48.40    1.80
   3   1   0   52.89    1.70
   4  -1   0   30.90    1.10
  -4  -1   0   31.40    1.30
   4  -1   0   30.40    1.10
  -4  -1   0   30.10    1.10
   4  -1   0   32.30    1.10
   4  -1   0   32.30    1.20
  -4  -1   0   32.20    1.10
  -4   1   0   30.20    1.10
  -4   1   0   31.60    1.20
   4   1   0   31.20    1.10
  -4   1   0   31.00    1.10
   4   1   0   33.30    1.20
   4   1   0   30.50    1.20
   4   1   0   30.20    1.10
  -5  -1   0  309.87    9.90
   5  -1   0  308.57    9.80
  -5  -1   0  315.97    9.90
  -5  -1   0  293.07    9.20
   5  -1   0  290.17    9.00
   5  -1   0  293.17    9.30
   5  -1   0  285.47    9.20
  -5  -1   0  298.97    9.00
   5  -1   0  297.57    9.90
   5   1   0  297.97    9.00
   5   1   0  289.97    9.20
   5   1   0  304.97    9.80
  -5   1   0  308.07    9.90
  -5   1   0  292.67    9.00
  -5   1   0  302.17    9.20
   5   1   0  293.17    9.90
  -6  -1   0   71.39    2.30
   6  -1   0   69.09    2.40
  -6  -1   0   71.19    2.40
   6  -1   0   68.49    2.40
   6  -1   0   68.29    2.30
   6  -1   0   63.49    2.50
  -6  -1   0   69.59    2.40
   6  -1   0   68.89    2.30
   6   1   0   67.09    2.40
   6   1   0   70.19    2.40
  -6   1   0   72.79    2.60
   6   1   0   70.29    2.30
  -6   1   0   65.09    2.30
  -6   1   0   68.59    2.40
   7  -1   0   45.00    1.90
  -7  -1   0   45.80    1.70
  -7  -1   0   47.50    1.70
   7  -1   0   45.90    1.70
  -7  -1   0   46.30    1.70
   7  -1   0   44.20    1.70
   7  -1   0   46.50    1.80
   7  -1   0   44.50    1.70
   7   1   0   44.40    1.70
   7   1   0   42.90    1.90
  -7   1   0   44.30    1.70
   7   1   0   44.90    1.70
  -7   1   0   43.60    1.80
   7   1   0   43.30    1.70
  -7   1   0   45.60    1.70
   8  -1   0    0.40    0.40
  -8  -1   0    0.50    0.40
  -8  -1   0    0.80    0.40
   8  -1   0    0.00    0.20
   8  -1   0    0.30    0.30
   8  -1   0    0.40    0.50
  -8  -1   0    0.30    0.20
   8  -1   0    0.60    0.40
   8   1   0    0.30    0.40
  -8   1   0   -0.10    0.40
  -8   1   0    0.30    0.30
   8   1   0    0.00    0.20
   8   1   0    0.50    0.40
  -8   1   0   -0.20    0.40
  -8   1   0    0.60    0.40
   8   1   0    0.50    0.50
   8   1   0    0.20    0.30
   9  -1   0   16.80    1.00
   9  -1   0   16.60    1.10
   9  -1   0   15.40    1.20
  -9  -1   0   17.80    1.00
  -9  -1   0   16.40    1.00
   9   1   0   17.30    1.10
  -9   1   0   17.90    1.00
  -9   1   0   15.70    1.00
   9   1   0   15.20    1.10
   9   1   0   16.00    1.10
   9   1   0   15.70    1.20
 -10  -1   0    2.20    0.60
  10  -1   0    1.50    0.60
  10  -1   0    3.00    0.70
 -10  -1   0    2.90    0.60
  10  -1   0    1.40    0.60
 -10   1   0    2.60    0.60
  10   1   0    2.30    0.60
 -10   1   0    2.50    0.60
  10   1   0    2.40    0.70
  10   1   0    1.30    0.70
 -11  -1   0    0.70    0.60
  11  -1   0    0.90    0.60
  11  -1   0    0.90    0.60
  11  -1   0    1.20    0.70
 -11   1   0    1.70    0.60
  11   1   0    1.60    0.70
 -11   1   0    1.40    0.60
  11   1   0    1.00    0.60
 -12  -1   0    2.70    0.70
  12  -1   0    2.40    0.80
 -12   1   0    2.40    0.70
  12   1   0    1.60    0.70
  12   1   0    1.30    0.70
 -13  -1   0    0.70    0.60
  13  -1   0    2.10    0.70
 -13   1   0    0.10    0.60
  13   1   0   -0.30    0.70
  14  -1   0    0.80    0.80
 -14  -1   0    0.40    0.70
  14   1   0    0.40    0.80
 -14   1   0    0.90    0.70
   1  -2   0  144.09    4.50
  -1  -2   0  147.49    4.30
  -1  -2   0  147.49    4.80
   1  -2   0  147.29    4.30
  -1  -2   0  143.09    4.40
   1  -2   0  148.89    4.70
   1  -2   0  140.09    4.40
   1  -2   0  137.49    4.40
  -1   2   0  145.99    4.40
   1   2   0  146.69    4.30
  -1   2   0  143.29    4.30
  -1   2   0  143.99    4.50
   1   2   0  147.69    4.70
  -1   2   0  146.49    4.40
   1   2   0  134.39    4.40
  -1   2   0  144.19    4.30
   1   2   0  145.09    4.40
   1   2   0  148.19    4.30
  -1   2   0  149.29    4.40
  -1   2   0  144.59    4.70
  -2  -2   0    5.00    0.30
   2  -2   0    4.90    0.30
  -2  -2   0    4.90    0.30
   2  -2   0    4.40    0.30
   2  -2   0    5.00    0.30
  -2  -2   0    4.60    0.30
   2  -2   0    5.20    0.30
   2  -2   0    4.90    0.30
  -2   2   0    5.00    0.40
   2   2   0    5.00    0.30
   2   2   0    5.30    0.30
  -2   2   0    5.00    0.30
   2   2   0    5.00    0.30
  -2   2   0    4.40    0.30
   2   2   0    3.60    0.30
   2   2   0    5.00    0.30
   3  -2   0  858.51   28.00
  -3  -2   0  881.11   28.20
  -3  -2   0  864.91   25.60
   3  -2   0  862.71   26.10
  -3  -2   0  859.21   26.10
   3  -2   0  887.21   28.20
   3  -2   0  855.01   25.60
   3   2   0  866.71   28.00
  -3   2   0  839.02   26.10
   3   2   0  869.61   26.10
   3   2   0  893.01   28.10
  -3   2   0  832.02   25.60
   3   2   0  853.81   25.60
  -3   2   0  874.01   28.00
  -4  -2   0  410.06   12.50
  -4  -2   0  428.56   13.60
   4  -2   0  420.46   13.60
   4  -2   0  427.96   13.60
   4  -2   0  403.76   12.40
   4  -2   0  421.06   12.50
  -4  -2   0  396.86   12.70
   4  -2   0  419.86   12.70
   4   2   0  416.66   13.60
  -4   2   0  404.56   12.70
   4   2   0  430.46   13.60
  -4   2   0  427.56   13.60
   4   2   0  404.96   12.50
  -4   2   0  410.56   12.40
   4   2   0  417.96   12.70
   5  -2   0   37.00    1.40
  -5  -2   0   40.70    1.40
  -5  -2   0   38.40    1.40
  -5  -2   0   38.40    1.40
   5  -2   0   39.00    1.40
   5  -2   0   39.40    1.40
   5  -2   0   37.90    1.40
   5   2   0   38.30    1.40
  -5   2   0   38.10    1.40
   5   2   0   37.70    1.40
   5   2   0   38.40    1.50
  -5   2   0   37.60    1.40
   5   2   0   39.50    1.40
  -5   2   0   41.90    1.60
   6  -2   0   26.60    1.20
  -6  -2   0   28.60    1.10
   6  -2   0   27.10    1.10
  -6  -2   0   26.80    1.10
   6  -2   0   26.50    1.20
   6  -2   0   28.50    1.10
  -6  -2   0   27.10    1.10
   6  -2   0   27.00    1.10
   6   2   0   26.80    1.10
  -6   2   0   26.00    1.10
   6   2   0   25.80    1.10
  -6   2   0   26.30    1.10
  -6   2   0   26.00    1.20
   6   2   0   27.40    1.10
   7  -2   0    1.40    0.40
   7  -2   0    1.00    0.40
  -7  -2   0    1.10    0.40
   7  -2   0    1.70    0.40
  -7  -2   0    1.00    0.30
   7  -2   0    1.60    0.40
   7  -2   0    0.50    0.30
  -7  -2   0    1.40    0.40
  -7   2   0    1.50    0.40
   7   2   0    1.10    0.40
   7   2   0    0.60    0.40
  -7   2   0    1.10    0.40
   7   2   0    1.20    0.30
  -7   2   0    1.30    0.40
   7   2   0    1.10    0.40
   8  -2   0    2.70    0.50
   8  -2   0    3.30    0.60
   8  -2   0    2.90    0.40
   8  -2   0    3.60    0.50
  -8  -2   0    2.90    0.50
  -8  -2   0    2.80    0.50
   8   2   0    3.30    0.40
  -8   2   0    3.50    0.50
   8   2   0    3.00    0.60
  -8   2   0    3.90    0.50
   8   2   0    2.30    0.50
   8   2   0    3.10    0.50
  -8   2   0    4.20    0.60
   9  -2   0    6.20    0.80
  -9  -2   0    5.50    0.50
   9  -2   0    6.50    0.80
   9  -2   0    8.10    0.80
  -9  -2   0    5.00    0.60
  -9  -2   0    7.00    0.70
   9   2   0    5.30    0.70
   9   2   0    6.60    0.70
  -9   2   0    5.60    0.70
  -9   2   0    6.40    0.70
   9   2   0    5.10    0.70
   9   2   0    6.40    0.80
  10  -2   0    6.70    0.80
  10  -2   0    5.90    0.80
 -10  -2   0    5.90    0.70
  10  -2   0    6.50    0.90
 -10  -2   0    6.20    0.70
  10   2   0    6.50    0.90
 -10   2   0    6.40    0.80
 -10   2   0    5.40    0.70
  10   2   0    6.40    0.80
  10   2   0    4.70    0.70
  11  -2   0    5.70    0.80
  11  -2   0    5.90    0.80
 -11  -2   0    4.70    0.70
  11  -2   0    6.50    0.90
 -11   2   0    4.80    0.70
  11   2   0    5.50    0.80
  11   2   0    6.70    0.80
 -11   2   0    6.20    0.70
  12  -2   0    2.10    0.70
 -12  -2   0    2.90    0.70
  12   2   0    1.80    0.60
 -12   2   0    2.30    0.60
  12   2   0    2.00    0.80
  13  -2   0    0.30    0.70
 -13  -2   0    0.40    0.60
  13   2   0    0.70    0.70
 -13   2   0    0.60    0.70
  14  -2   0    3.20    1.00
 -14  -2   0    4.00    0.90
 -14   2   0    4.40    0.90
  14   2   0    3.90    1.00
   0  -3   0   -0.60    0.10
   0  -3   0   -0.50    0.10
   0  -3   0   -0.40    0.10
   0   3   0   -0.50    0.10
   0   3   0   -0.50    0.10
   0   3   0   -0.40    0.10
   0   3   0   -0.60    0.10
  -1  -3   0 1164.38   36.50
  -1  -3   0 1077.19   33.70
   1  -3   0 1133.59   33.00
   1  -3   0 1097.69   33.80
   1  -3   0 1111.29   33.90
   1  -3   0 1085.99   34.20
  -1  -3   0 1124.69   33.20
   1  -3   0 1110.99   36.40
   1   3   0 1105.69   33.10
   1   3   0 1140.99   33.90
  -1   3   0 1073.59   34.20
   1   3   0 1127.99   33.80
  -1   3   0 1112.29   33.70
   1   3   0 1090.09   33.10
  -1   3   0 1098.79   33.80
   1   3   0 1184.08   36.20
  -1   3   0 1084.19   36.10
  -1   3   0 1110.59   33.10
  -1   3   0 1109.19   33.10
  -1   3   0 1151.58   33.90
   1   3   0 1113.49   33.80
   2  -3   0  214.08    6.80
   2  -3   0  203.78    6.30
   2  -3   0  212.88    6.40
  -2  -3   0  211.78    6.20
   2  -3   0  207.08    6.80
   2  -3   0  198.88    6.20
  -2  -3   0  210.68    6.80
  -2  -3   0  202.58    6.30
  -2   3   0  209.08    6.80
   2   3   0  220.58    6.80
  -2   3   0  204.88    6.30
  -2   3   0  202.78    6.20
   2   3   0  203.28    6.20
  -2   3   0  206.08    6.20
   2   3   0  201.68    6.40
   2   3   0  203.58    6.30
  -3  -3   0  619.94   19.10
   3  -3   0  631.14   18.70
   3  -3   0  656.13   20.50
  -3  -3   0  635.94   18.70
  -3  -3   0  644.44   20.50
   3  -3   0  616.74   19.00
   3  -3   0  605.94   20.40
   3  -3   0  641.14   19.10
  -3   3   0  625.94   20.40
   3   3   0  620.64   18.70
   3   3   0  631.54   20.40
  -3   3   0  614.04   19.10
   3   3   0  626.84   19.10
   3   3   0  628.24   19.10
   3   3   0  648.14   20.50
  -3   3   0  613.24   18.70
   4  -3   0  142.59    4.30
  -4  -3   0  139.29    4.30
   4  -3   0  138.59    4.70
  -4  -3   0  142.59    4.70
   4  -3   0  144.39    4.60
   4  -3   0  138.59    4.40
  -4  -3   0  138.79    4.40
  -4   3   0  137.79    4.40
  -4   3   0  137.59    4.30
   4   3   0  139.19    4.70
   4   3   0  134.49    4.30
  -4   3   0  140.89    4.70
   4   3   0  140.99    4.40
   4   3   0  138.99    4.70
   5  -3   0   27.30    1.10
   5  -3   0   28.20    1.20
   5  -3   0   28.30    1.10
  -5  -3   0   27.30    1.10
   5  -3   0   28.50    1.10
  -5  -3   0   29.00    1.10
  -5  -3   0   27.40    1.10
   5  -3   0   28.90    1.10
   5   3   0   28.50    1.10
  -5   3   0   27.60    1.10
   5   3   0   26.50    1.10
  -5   3   0   27.80    1.10
  -5   3   0   28.90    1.20
   5   3   0   26.80    1.10
   5   3   0   28.10    1.20
   6  -3   0    2.70    0.40
  -6  -3   0    3.50    0.40
  -6  -3   0    2.60    0.30
   6  -3   0    2.60    0.40
   6  -3   0    3.10    0.40
   6  -3   0    3.30    0.30
   6  -3   0    3.10    0.50
  -6  -3   0    2.60    0.40
  -6   3   0    3.20    0.50
   6   3   0    2.20    0.40
   6   3   0    2.40    0.50
  -6   3   0    3.00    0.40
  -6   3   0    3.50    0.40
   6   3   0    3.30    0.30
   6   3   0    2.80    0.40
   6   3   0    3.30    0.40
  -7  -3   0   18.20    0.90
   7  -3   0   19.60    0.90
   7  -3   0   18.40    0.80
   7  -3   0   18.00    1.00
   7  -3   0   18.90    1.10
   7  -3   0   17.70    0.90
  -7  -3   0   18.50    0.90
   7   3   0   17.10    0.90
  -7   3   0   18.00    0.90
  -7   3   0   18.10    1.00
  -7   3   0   18.70    0.90
   7   3   0   16.80    1.00
   7   3   0   18.80    0.90
   7   3   0   18.30    0.90
   8  -3   0   37.60    1.50
  -8  -3   0   30.80    1.40
  -8  -3   0   36.60    1.50
  -8  -3   0   36.90    1.50
   8  -3   0   36.70    1.50
   8  -3   0   39.50    1.70
   8  -3   0   37.60    1.40
   8  -3   0   31.40    1.50
  -8   3   0   36.60    1.70
   8   3   0   38.00    1.70
  -8   3   0   37.90    1.50
  -8   3   0   36.80    1.50
   8   3   0   35.60    1.50
   8   3   0   38.00    1.50
  -9  -3   0  189.48    6.00
   9  -3   0  178.28    6.10
   9  -3   0  188.58    6.50
   9  -3   0  181.88    5.90
  -9  -3   0  185.28    6.30
  -9  -3   0  185.38    5.90
   9   3   0  183.28    6.10
  -9   3   0  183.98    5.90
   9   3   0  190.18    6.60
  -9   3   0  192.68    6.10
   9   3   0  182.48    5.90
   9   3   0  186.18    6.00
  10  -3   0    0.80    0.60
  10  -3   0    1.10    0.60
 -10  -3   0    0.20    0.50
  10  -3   0    0.30    0.60
 -10  -3   0    0.20    0.50
 -10   3   0   -0.40    0.50
  10   3   0    1.70    0.70
  10   3   0    0.60    0.50
  10   3   0   -0.30    0.60
 -10   3   0    0.60    0.50
  11  -3   0    2.80    0.80
 -11  -3   0    3.80    0.70
  11  -3   0    1.50    0.70
  11  -3   0    2.90    0.70
  11   3   0    2.20    0.70
 -11   3   0    2.40    0.60
  11   3   0    1.90    0.60
 -11   3   0    3.00    0.60
 -12  -3   0   15.10    1.20
  12  -3   0   11.40    1.10
  12   3   0   13.10    1.10
  12   3   0   12.20    1.10
 -12   3   0   14.70    1.10
  13  -3   0    0.80    0.80
 -13  -3   0    0.70    0.60
  13   3   0   -0.30    0.60
 -13   3   0    0.00    0.60
  13   3   0    0.10    0.70
  14  -3   0   -1.40    0.80
 -14  -3   0    0.60    0.70
 -14   3   0    1.90    0.70
  14   3   0    0.40    0.80
   0  -4   0   66.69    2.10
   0  -4   0   67.69    2.10
   0  -4   0   68.49    2.30
   0   4   0   68.09    2.10
   0   4   0   68.19    2.30
   0   4   0   67.69    2.10
   0   4   0   67.59    2.10
   0   4   0   68.09    2.10
   0   4   0   67.49    2.10
   1  -4   0   39.00    1.30
   1  -4   0   39.50    1.20
  -1  -4   0   38.50    1.20
   1  -4   0   38.70    1.30
   1  -4   0   38.90    1.20
   1  -4   0   40.10    1.20
  -1  -4   0   38.30    1.20
  -1  -4   0   38.90    1.40
   1  -4   0   38.80    1.30
  -1   4   0   38.10    1.30
  -1   4   0   38.80    1.20
  -1   4   0   38.00    1.30
  -1   4   0   38.50    1.20
   1   4   0   39.50    1.30
   1   4   0   37.00    1.30
  -1   4   0   38.60    1.20
   1   4   0   38.00    1.20
   1   4   0   38.60    1.30
  -1   4   0   38.70    1.30
  -1   4   0   38.90    1.20
   1   4   0   38.20    1.20
   2  -4   0   11.60    0.50
   2  -4   0   11.60    0.50
  -2  -4   0   12.70    0.60
   2  -4   0   11.70    0.50
  -2  -4   0   12.40    0.50
  -2  -4   0   12.30    0.50
   2  -4   0   12.00    0.50
   2  -4   0   12.20    0.50
   2   4   0   11.30    0.50
  -2   4   0   12.30    0.60
   2   4   0   12.20    0.50
  -2   4   0   11.60    0.50
   2   4   0   11.30    0.60
   2   4   0   12.30    0.50
  -2   4   0   11.60    0.50
  -2   4   0   12.60    0.50
   3  -4   0  295.87    9.40
   3  -4   0  287.17    8.70
   3  -4   0  279.77    9.40
   3  -4   0  286.57    8.80
   3  -4   0  290.07    8.60
  -3  -4   0  291.97    8.60
  -3  -4   0  286.47    9.40
  -3  -4   0  279.47    8.70
   3   4   0  293.97    8.80
   3   4   0  288.57    9.40
  -3   4   0  280.07    8.60
  -3   4   0  281.37    8.70
   3   4   0  279.17    8.80
  -3   4   0  290.37    9.40
   3   4   0  276.37    8.60
  -4  -4   0   36.20    1.30
  -4  -4   0   38.80    1.40
  -4  -4   0   37.50    1.30
   4  -4   0   37.90    1.40
   4  -4   0   38.10    1.30
   4  -4   0   38.80    1.40
   4  -4   0   37.30    1.30
   4  -4   0   38.70    1.40
   4   4   0   37.60    1.40
   4   4   0   36.90    1.30
  -4   4   0   37.20    1.30
   4   4   0   36.20    1.30
  -4   4   0   36.50    1.30
  -4   4   0   36.00    1.40
   4   4   0   37.90    1.50
  -5  -4   0  237.88    7.50
  -5  -4   0  247.08    7.60
   5  -4   0  238.78    7.50
   5  -4   0  248.78    7.60
  -5  -4   0  257.47    8.20
   5  -4   0  247.08    8.10
   5  -4   0  249.58    7.70
   5   4   0  241.98    7.50
   5   4   0  245.98    8.20
   5   4   0  244.68    7.60
  -5   4   0  243.88    7.50
  -5   4   0  244.48    8.20
   5   4   0  248.28    7.70
  -5   4   0  237.88    7.60
   6  -4   0  131.29    4.20
  -6  -4   0  128.89    4.10
   6  -4   0  125.49    4.10
   6  -4   0  129.89    4.50
   6  -4   0  128.79    4.10
   6  -4   0  127.89    4.20
  -6  -4   0  129.39    4.20
   6  -4   0  129.59    4.30
   6   4   0  132.19    4.50
  -6   4   0  128.69    4.20
  -6   4   0  130.09    4.10
   6   4   0  126.49    4.10
   6   4   0  131.29    4.20
  -6   4   0  132.19    4.50
   6   4   0  126.99    4.20
  -7  -4   0    8.90    0.70
   7  -4   0    7.00    0.60
  -7  -4   0    7.80    0.60
   7  -4   0    8.80    0.70
   7  -4   0    9.50    0.70
   7  -4   0    9.10    0.50
   7  -4   0    8.50    0.60
   7   4   0    8.80    0.70
  -7   4   0    8.20    0.70
  -7   4   0    8.60    0.70
  -7   4   0    8.30    0.60
   7   4   0    8.70    0.70
   8  -4   0   51.29    2.20
   8  -4   0   51.99    2.10
   8  -4   0   52.69    1.90
   8  -4   0   53.19    2.00
  -8  -4   0   54.09    2.00
   8  -4   0   54.29    2.00
  -8  -4   0   54.69    2.00
  -8  -4   0   52.69    2.00
   8   4   0   55.19    2.30
  -8   4   0   52.69    2.00
  -8   4   0   54.79    2.20
   8   4   0   52.59    2.00
   8   4   0   50.79    2.00
  -8   4   0   53.19    2.00
   9  -4   0  138.99    4.80
   9  -4   0  146.79    4.70
  -9  -4   0  138.29    4.70
   9  -4   0  141.49    5.10
  -9  -4   0  141.79    4.90
  -9  -4   0  138.59    4.60
  -9   4   0  143.29    4.60
   9   4   0  143.39    4.70
   9   4   0  148.29    5.10
   9   4   0  137.39    4.60
   9   4   0  139.39    4.80
  -9   4   0  137.69    4.70
  10  -4   0    7.70    0.80
  10  -4   0    6.80    0.90
  10  -4   0    6.80    0.80
 -10  -4   0    6.60    0.70
  10   4   0    7.80    0.80
 -10   4   0    7.10    0.80
  10   4   0    8.00    0.80
  10   4   0    6.70    0.90
 -10   4   0    7.50    0.80
  11  -4   0   11.70    1.10
 -11  -4   0   11.30    1.00
  11  -4   0   10.40    1.10
  11   4   0   11.70    1.00
 -11   4   0   11.90    0.90
 -11   4   0   12.20    1.00
  11   4   0    9.60    1.00
 -12  -4   0   -0.10    0.50
  12  -4   0   -0.70    0.70
  12   4   0   -0.40    0.60
  12   4   0   -1.20    0.60
 -12   4   0   -0.50    0.50
 -13  -4   0    5.10    0.80
  13  -4   0    2.70    0.90
  13   4   0    4.40    0.90
  13   4   0    3.10    0.80
 -13   4   0    4.00    0.80
  14  -4   0    3.20    1.00
 -14  -4   0    3.10    0.80
 -14   4   0    4.60    0.90
  14   4   0    4.50    1.00
   0  -5   0   -0.10    0.10
   0  -5   0   -0.10    0.10
   0  -5   0   -0.30    0.20
   0   5   0   -0.30    0.10
   0   5   0   -0.10    0.10
   0   5   0    0.00    0.10
   0   5   0    0.10    0.10
   0   5   0    0.00    0.20
  -1  -5   0    7.80    0.40
   1  -5   0    8.40    0.40
  -1  -5   0    7.40    0.40
   1  -5   0    8.10    0.40
  -1  -5   0    6.80    0.40
   1  -5   0    7.40    0.40
   1  -5   0    7.90    0.40
   1  -5   0    7.80    0.30
  -1   5   0    7.60    0.30
  -1   5   0    7.90    0.40
   1   5   0    7.20    0.40
   1   5   0    7.90    0.40
  -1   5   0    7.20    0.40
   1   5   0    7.10    0.40
  -1   5   0    7.50    0.40
   1   5   0    7.70    0.40
   1   5   0    7.60    0.40
  -1   5   0    7.50    0.40
  -1   5   0    7.80    0.40
  -1   5   0    7.90    0.40
  -2  -5   0  338.67   10.00
   2  -5   0  338.87   10.90
   2  -5   0  334.07   10.30
   2  -5   0  330.27    9.90
   2  -5   0  337.67   10.20
   2  -5   0  338.37   10.10
  -2  -5   0  339.77   11.00
  -2  -5   0  326.87   10.10
   2   5   0  337.97   10.90
   2   5   0  324.17   10.20
  -2   5   0  342.47    9.90
   2   5   0  326.77    9.90
  -2   5   0  330.67   10.20
  -2   5   0  325.37    9.90
   2   5   0  321.37   10.20
   2   5   0  332.17   10.20
  -2   5   0  328.87   10.10
  -2   5   0  347.27   10.90
   3  -5   0   78.49    2.60
   3  -5   0   78.19    2.40
   3  -5   0   73.49    2.60
  -3  -5   0   77.79    2.60
  -3  -5   0   77.69    2.50
  -3  -5   0   76.39    2.40
   3  -5   0   78.89    2.40
   3   5   0   74.79    2.50
  -3   5   0   77.09    2.60
   3   5   0   76.69    2.70
   3   5   0   74.89    2.50
  -3   5   0   73.69    2.40
   3   5   0   73.79    2.40
  -3   5   0   73.49    2.40
   4  -5   0   43.40    1.50
  -4  -5   0   44.80    1.60
   4  -5   0   44.50    1.60
  -4  -5   0   47.80    1.60
   4  -5   0   44.40    1.50
   4  -5   0   45.20    1.60
  -4  -5   0   44.10    1.50
  -4   5   0   41.30    1.50
   4   5   0   46.50    1.60
  -4   5   0   42.80    1.70
  -4   5   0   43.40    1.50
   4   5   0   44.00    1.70
   4   5   0   41.30    1.50
   4   5   0   42.50    1.50
  -5  -5   0  167.68    5.30
   5  -5   0  175.08    5.80
   5  -5   0  174.18    5.70
   5  -5   0  171.18    5.40
   5  -5   0  169.68    5.30
  -5  -5   0  153.28    5.80
   5  -5   0  167.98    5.50
  -5  -5   0  174.78    5.40
   5   5   0  181.88    5.80
  -5   5   0  174.78    5.40
   5   5   0  169.68    5.50
  -5   5   0  165.68    5.30
   5   5   0  173.18    5.40
  -5   5   0  183.28    5.80
   5   5   0  172.58    5.30
   6  -5   0   25.00    1.20
   6  -5   0   24.70    1.00
   6  -5   0   23.80    1.10
  -6  -5   0   24.50    1.10
  -6  -5   0   25.20    1.10
   6  -5   0   22.30    1.00
   6  -5   0   25.00    1.00
  -6   5   0   25.00    1.20
   6   5   0   23.40    1.10
  -6   5   0   23.50    1.10
  -6   5   0   25.20    1.00
   6   5   0   25.00    1.10
   6   5   0   26.60    1.20
   6   5   0   25.40    1.10
  -7  -5   0    9.00    0.70
   7  -5   0    8.60    0.50
   7  -5   0    9.70    0.80
  -7  -5   0    9.60    0.60
   7  -5   0    7.40    0.60
  -7  -5   0    8.60    0.70
   7  -5   0    8.70    0.60
   7  -5   0    9.00    0.80
   7  -5   0    9.10    0.70
   7   5   0    9.10    0.70
  -7   5   0   10.10    0.70
  -7   5   0    9.40    0.80
  -7   5   0    9.00    0.70
   7   5   0    9.90    0.70
   8  -5   0   35.50    1.40
   8  -5   0   33.60    1.50
  -8  -5   0   36.30    1.50
  -8  -5   0   36.00    1.50
   8  -5   0   34.00    1.60
   8  -5   0   35.90    1.50
  -8  -5   0   34.10    1.50
  -8   5   0   35.50    1.50
   8   5   0   38.70    1.70
   8   5   0   35.60    1.50
  -8   5   0   35.80    1.50
  -8   5   0   36.40    1.60
   8   5   0   33.00    1.50
  -9  -5   0   48.00    2.00
   9  -5   0   48.40    2.10
   9  -5   0   49.50    2.00
  -9  -5   0   47.40    2.00
  -9  -5   0   46.00    1.90
   9  -5   0   53.99    2.20
   9   5   0   52.49    2.30
   9   5   0   47.50    2.10
  -9   5   0   49.40    2.00
   9   5   0   48.80    2.00
   9   5   0   48.70    2.00
  -9   5   0   47.80    1.90
  10  -5   0   42.40    2.10
  10  -5   0   42.70    1.90
 -10  -5   0   40.20    1.80
  10  -5   0   44.10    1.90
 -10   5   0   43.40    1.80
  10   5   0   44.30    1.90
  10   5   0   42.80    1.90
 -10   5   0   41.30    1.80
  11  -5   0    7.20    1.00
 -11  -5   0    6.80    0.80
  11  -5   0    5.30    0.80
 -11   5   0    5.90    0.70
  11   5   0    6.00    0.90
 -11   5   0    5.40    0.80
  11   5   0    5.30    0.80
  12  -5   0    2.20    0.80
 -12  -5   0    2.10    0.60
 -12   5   0    2.40    0.60
  12   5   0    0.40    0.70
  12   5   0    1.40    0.70
  13  -5   0    0.60    0.80
 -13  -5   0    0.00    0.60
  13   5   0   -0.80    0.60
 -13   5   0    0.50    0.60
  13   5   0    0.70    0.70
  14  -5   0    0.20    0.90
 -14  -5   0    2.20    0.80
 -14   5   0    1.60    0.80
  14   5   0    0.00    0.80
   0  -6   0  468.45   13.60
   0  -6   0  457.25   13.90
   0  -6   0  458.55   15.00
   0   6   0  459.95   13.90
   0   6   0  466.45   14.00
   0   6   0  445.36   13.60
   0   6   0  449.36   13.90
   0   6   0  463.95   14.90
   0   6   0  466.85   13.60
   1  -6   0   77.79    2.70
  -1  -6   0   79.19    2.40
   1  -6   0   79.29    2.50
   1  -6   0   77.19    2.40
  -1  -6   0   72.19    2.70
  -1  -6   0   78.09    2.50
   1  -6   0   77.09    2.50
  -1   6   0   81.59    2.50
   1   6   0   79.19    2.50
  -1   6   0   80.89    2.50
  -1   6   0   83.29    2.70
  -1   6   0   77.49    2.40
   1   6   0   76.99    2.40
  -1   6   0   79.09    2.50
  -1   6   0   82.59    2.40
  -1   6   0   77.09    2.50
   1   6   0   79.39    2.70
   1   6   0   82.19    2.40
   1   6   0   76.49    2.50
   2  -6   0  190.08    5.70
  -2  -6   0  179.28    6.10
   2  -6   0  184.38    5.70
   2  -6   0  177.68    5.60
   2  -6   0  182.18    5.60
   2  -6   0  184.18    5.50
  -2  -6   0  182.48    5.60
   2  -6   0  178.08    6.00
  -2  -6   0  186.78    5.50
   2   6   0  177.48    5.50
  -2   6   0  178.98    5.50
   2   6   0  180.38    5.60
  -2   6   0  185.68    5.60
   2   6   0  179.68    5.60
   2   6   0  183.98    5.60
  -2   6   0  181.38    6.00
   2   6   0  183.38    6.00
  -2   6   0  175.68    5.50
  -2   6   0  178.98    5.60
  -3  -6   0  101.49    3.20
   3  -6   0   97.49    3.40
  -3  -6   0  101.69    3.20
   3  -6   0  100.79    3.40
  -3  -6   0  101.19    3.50
   3  -6   0  100.79    3.20
   3  -6   0  103.89    3.20
   3  -6   0  101.19    3.20
  -3   6   0   99.59    3.20
   3   6   0  101.99    3.30
   3   6   0   99.99    3.10
  -3   6   0  100.09    3.10
   3   6   0   97.59    3.20
   3   6   0  104.89    3.50
  -3   6   0  103.29    3.40
   4  -6   0   67.29    2.20
   4  -6   0   68.79    2.40
   4  -6   0   68.99    2.30
  -4  -6   0   66.69    2.40
  -4  -6   0   67.39    2.30
  -4  -6   0   68.19    2.20
   4  -6   0   68.19    2.20
  -4   6   0   68.69    2.30
  -4   6   0   66.39    2.20
   4   6   0   69.49    2.30
   4   6   0   65.09    2.30
   4   6   0   71.79    2.50
  -4   6   0   71.49    2.50
   4   6   0   66.49    2.20
   5  -6   0    6.40    0.50
  -5  -6   0    6.90    0.50
   5  -6   0    5.80    0.50
  -5  -6   0    6.00    0.50
   5  -6   0    5.60    0.40
   5  -6   0    6.80    0.50
   5  -6   0    7.30    0.60
   5   6   0    6.40    0.60
   5   6   0    5.80    0.50
   5   6   0    5.90    0.60
  -5   6   0    5.40    0.50
   5   6   0    6.60    0.50
  -5   6   0    5.60    0.50
  -5   6   0    6.50    0.50
  -6  -6   0   73.09    2.60
   6  -6   0   82.49    2.60
   6  -6   0   78.99    2.70
  -6  -6   0   76.79    2.60
   6  -6   0   78.39    2.60
  -6  -6   0   79.19    2.80
   6  -6   0   76.59    2.90
   6  -6   0   77.29    2.70
  -6   6   0   77.09    2.60
   6   6   0   80.39    2.90
  -6   6   0   78.49    2.90
   6   6   0   78.39    2.70
   6   6   0   76.09    2.70
   6   6   0   78.39    2.60
  -6   6   0   79.49    2.60
  -7  -6   0    0.00    0.30
   7  -6   0    0.20    0.40
   7  -6   0   -0.20    0.40
  -7  -6   0    0.40    0.30
   7  -6   0    0.00    0.20
   7  -6   0   -0.20    0.30
  -7  -6   0    0.50    0.30
   7  -6   0    0.00    0.30
   7  -6   0   -0.10    0.30
   7   6   0    0.00    0.20
  -7   6   0   -0.10    0.30
  -7   6   0    0.00    0.30
  -7   6   0    0.10    0.30
   7   6   0    0.50    0.30
   7   6   0   -0.30    0.30
   7   6   0    0.20    0.30
   8  -6   0    2.60    0.40
  -8  -6   0    2.70    0.40
  -8  -6   0    2.00    0.50
  -8  -6   0    2.90    0.50
   8  -6   0    3.40    0.60
   8  -6   0    2.90    0.60
   8  -6   0    2.20    0.50
   8  -6   0    2.90    0.50
   8   6   0    2.50    0.50
   8   6   0    3.10    0.60
  -8   6   0    3.50    0.50
   8   6   0    2.60    0.50
   8   6   0    3.00    0.50
  -8   6   0    3.20    0.50
  -9  -6   0   59.49    2.30
   9  -6   0   62.89    2.30
  -9  -6   0   61.49    2.30
  -9  -6   0   62.09    2.30
   9  -6   0   58.99    2.40
   9  -6   0   64.09    2.60
   9   6   0   56.99    2.30
   9   6   0   63.49    2.50
  -9   6   0   61.99    2.30
   9   6   0   63.09    2.60
   9   6   0   58.29    2.30
  -9   6   0   61.89    2.30
  10  -6   0   26.40    1.50
 -10  -6   0   26.70    1.40
  10  -6   0   28.40    1.70
  10   6   0   28.80    1.50
  10   6   0   29.00    1.50
 -10   6   0   26.00    1.40
 -10   6   0   27.20    1.40
 -11  -6   0    6.70    0.80
  11  -6   0    5.10    0.90
  11  -6   0    4.60    0.80
  11   6   0    4.40    0.70
  11   6   0    5.40    0.80
 -11   6   0    5.10    0.70
 -11   6   0    4.40    0.70
  12  -6   0    4.20    0.90
 -12  -6   0    4.00    0.70
  12   6   0    2.90    0.80
  12   6   0    2.80    0.70
 -12   6   0    2.40    0.70
 -13  -6   0    0.70    0.60
  13  -6   0    0.70    0.70
  13   6   0   -0.80    0.70
  13   6   0    0.70    0.70
 -13   6   0    0.70    0.60
 -14  -6   0    1.90    0.80
  14  -6   0    1.10    0.90
  14   6   0    1.90    0.80
  14   6   0    2.30    0.80
 -14   6   0    0.60    0.70
   0  -7   0    0.20    0.20
   0  -7   0    0.10    0.10
   0  -7   0    0.00    0.10
   0   7   0    0.10    0.10
   0   7   0   -0.20    0.10
   0   7   0    0.00    0.20
   0   7   0    0.10    0.20
   0   7   0   -0.10    0.20
   0   7   0    0.20    0.20
   1  -7   0  705.33   21.40
  -1  -7   0  713.03   21.00
   1  -7   0  696.63   21.60
   1  -7   0  697.53   23.10
  -1  -7   0  716.33   21.40
   1  -7   0  721.83   20.90
   1   7   0  721.93   22.90
   1   7   0  713.03   20.90
  -1   7   0  712.33   22.90
  -1   7   0  701.93   20.90
   1   7   0  689.03   20.90
  -1   7   0  682.73   21.40
  -1   7   0  706.43   20.90
   1   7   0  697.73   21.40
  -1   7   0  704.23   21.50
  -1   7   0  709.73   21.40
  -1   7   0  702.23   21.60
   1   7   0  713.13   21.50
  -2  -7   0    2.30    0.30
   2  -7   0    2.50    0.30
   2  -7   0    2.50    0.30
   2  -7   0    2.80    0.30
   2  -7   0    2.00    0.20
  -2  -7   0    2.30    0.30
   2  -7   0    2.50    0.20
  -2  -7   0    2.30    0.20
   2  -7   0    2.10    0.20
  -2   7   0    2.60    0.20
  -2   7   0    2.50    0.20
  -2   7   0    2.60    0.30
   2   7   0    2.10    0.20
  -2   7   0    2.40    0.30
   2   7   0    2.30    0.30
  -2   7   0    2.00    0.20
   2   7   0    2.30    0.30
   2   7   0    2.50    0.30
   3  -7   0  353.46   10.60
  -3  -7   0  322.67   11.40
   3  -7   0  346.87   11.40
   3  -7   0  352.46   10.70
  -3  -7   0  351.46   10.60
   3  -7   0  347.57   10.40
  -3  -7   0  356.56   10.40
   3   7   0  362.06   11.40
  -3   7   0  354.66   10.40
  -3   7   0  344.37   10.60
   3   7   0  338.87   10.60
   3   7   0  351.36   10.70
  -3   7   0  342.97   10.60
   3   7   0  338.37   10.40
  -3   7   0  336.27   10.40
  -3   7   0  353.16   11.40
   3   7   0  337.17   10.60
  -4  -7   0  266.07    8.20
   4  -7   0  274.87    8.10
  -4  -7   0  265.37    8.30
   4  -7   0  275.77    8.30
   4  -7   0  275.37    8.40
   4  -7   0  276.97    8.90
   4  -7   0  253.67    8.90
   4   7   0  266.07    8.10
  -4   7   0  268.57    8.10
   4   7   0  264.87    8.30
  -4   7   0  271.77    8.90
  -4   7   0  267.07    8.30
   4   7   0  272.97    8.90
   4   7   0  267.57    8.40
   5  -7   0  145.89    4.60
   5  -7   0  149.88    4.70
   5  -7   0  142.19    4.60
   5  -7   0  147.09    5.00
  -5  -7   0  143.79    5.00
   5  -7   0  149.99    4.90
  -5  -7   0  145.39    4.60
  -5  -7   0  145.29    4.70
  -5   7   0  143.79    4.50
  -5   7   0  143.99    4.60
   5   7   0  149.59    4.70
   5   7   0  141.69    5.00
   5   7   0  148.89    4.60
   5   7   0  141.69    4.70
  -5   7   0  152.48    5.00
  -6  -7   0    1.10    0.30
  -6  -7   0    0.40    0.30
   6  -7   0    0.70    0.30
   6  -7   0    1.00    0.30
   6  -7   0    1.10    0.30
   6  -7   0    0.90    0.30
  -6  -7   0    1.20    0.30
   6  -7   0    1.10    0.40
   6   7   0    0.60    0.40
  -6   7   0    0.80    0.30
  -6   7   0    0.90    0.30
  -6   7   0    1.10    0.30
   6   7   0    1.00    0.40
   6   7   0    0.70    0.40
   6   7   0    1.30    0.40
   7  -7   0   17.10    0.90
   7  -7   0   15.90    0.80
  -7  -7   0   16.80    0.90
   7  -7   0   17.10    0.90
   7  -7   0   16.60    1.00
  -7  -7   0   17.40    0.90
  -7  -7   0   15.60    0.90
   7  -7   0   16.10    1.00
  -7   7   0   15.20    0.90
  -7   7   0   15.50    0.90
  -7   7   0   17.00    1.00
   7   7   0   15.60    0.90
   7   7   0   11.80    0.80
   7   7   0   17.40    0.90
   8  -7   0    7.90    0.70
   8  -7   0    6.60    0.70
  -8  -7   0    8.00    0.70
   8  -7   0    7.50    0.50
   8  -7   0    6.90    0.70
  -8  -7   0    7.50    0.60
   8  -7   0    7.90    0.80
  -8  -7   0    8.50    0.70
   8   7   0    6.40    0.70
   8   7   0    7.00    0.70
   8   7   0    7.30    0.80
  -8   7   0    6.60    0.60
   8   7   0    7.30    0.80
  -8   7   0    6.70    0.70
  -9  -7   0    1.00    0.40
  -9  -7   0    0.80    0.50
   9  -7   0    0.80    0.60
   9  -7   0    1.90    0.60
   9  -7   0    1.90    0.50
  -9  -7   0    1.50    0.50
   9   7   0    1.50    0.60
  -9   7   0    2.20    0.50
   9   7   0    1.80    0.60
   9   7   0    0.40    0.50
  -9   7   0    2.00    0.50
   9   7   0    1.60    0.70
  10  -7   0   12.30    1.10
 -10  -7   0   15.60    1.10
  10  -7   0   12.10    1.10
  10   7   0   13.80    1.10
 -10   7   0   16.70    1.10
  10   7   0   15.30    1.20
 -10   7   0   13.80    1.00
  11  -7   0    7.20    0.90
 -11  -7   0    8.50    0.90
  11  -7   0    6.80    1.00
 -11   7   0    8.10    0.90
  11   7   0    8.10    0.90
  11   7   0    7.90    1.00
 -11   7   0    7.10    0.80
  12  -7   0    1.40    0.70
 -12  -7   0    0.90    0.60
  12   7   0    2.30    0.70
  12   7   0    0.80    0.60
 -12   7   0    0.40    0.60
  13  -7   0    2.50    0.90
 -13  -7   0    2.00    0.80
 -13   7   0    3.30    0.70
  13   7   0    1.90    0.80
  13   7   0    1.70    0.70
 -14  -7   0    0.90    0.80
  14  -7   0   -1.00    0.80
  14   7   0   -1.50    0.80
 -14   7   0   -1.20    0.60
  14   7   0    0.50    0.80
   0  -8   0  117.59    4.00
   0  -8   0  120.99    3.70
   0  -8   0  122.29    3.60
   0  -8   0  117.99    3.70
   0   8   0  112.19    3.60
   0   8   0  118.59    3.60
   0   8   0  121.89    3.70
   0   8   0  120.89    3.70
   0   8   0  113.79    3.70
   0   8   0  119.39    4.00
   1  -8   0    9.00    0.40
  -1  -8   0    8.90    0.40
  -1  -8   0    8.20    0.40
   1  -8   0    9.10    0.40
   1  -8   0    8.70    0.40
   1  -8   0    9.00    0.50
   1   8   0    8.90    0.50
  -1   8   0    9.10    0.50
  -1   8   0    7.90    0.40
  -1   8   0    8.70    0.40
   1   8   0    8.40    0.40
  -1   8   0    8.90    0.40
   1   8   0    8.20    0.40
   1   8   0    8.90    0.50
   1   8   0    8.40    0.40
  -1   8   0    8.40    0.50
  -1   8   0    8.50    0.40
  -1   8   0    8.80    0.40
   2  -8   0    2.40    0.20
   2  -8   0    2.10    0.20
  -2  -8   0    2.50    0.30
  -2  -8   0    3.00    0.30
   2  -8   0    2.60    0.30
   2  -8   0    2.00    0.30
   2  -8   0    2.70    0.30
   2  -8   0    2.50    0.20
   2   8   0    2.80    0.30
  -2   8   0    2.80    0.30
  -2   8   0    2.30    0.20
   2   8   0    3.10    0.30
  -2   8   0    3.00    0.30
  -2   8   0    2.80    0.30
  -2   8   0    2.40    0.30
   2   8   0    2.50    0.30
   2   8   0    2.70    0.30
   3  -8   0   64.69    2.10
   3  -8   0   65.79    2.10
   3  -8   0   62.49    2.20
   3  -8   0   64.49    2.10
  -3  -8   0   63.09    2.10
  -3  -8   0   63.59    2.10
   3  -8   0   57.39    2.10
   3   8   0   60.79    2.00
  -3   8   0   65.99    2.00
   3   8   0   62.79    2.10
  -3   8   0   66.19    2.30
   3   8   0   63.79    2.10
  -3   8   0   61.89    2.10
  -3   8   0   60.89    2.10
  -3   8   0   61.39    2.00
   3   8   0   61.89    2.10
   3   8   0   62.69    2.30
  -4  -8   0    9.60    0.60
  -4  -8   0   11.60    0.60
   4  -8   0   10.00    0.60
   4  -8   0   10.10    0.60
   4  -8   0    9.90    0.60
  -4  -8   0    9.20    0.60
   4  -8   0   13.10    0.60
   4  -8   0   10.30    0.70
  -4   8   0    9.30    0.70
   4   8   0   10.60    0.60
   4   8   0    9.10    0.60
   4   8   0    9.00    0.70
  -4   8   0    9.20    0.60
   4   8   0   10.70    0.60
  -4   8   0    9.40    0.60
   4   8   0    9.10    0.60
   5  -8   0    3.00    0.40
  -5  -8   0    3.40    0.40
   5  -8   0    3.90    0.40
  -5  -8   0    4.60    0.40
   5  -8   0    3.50    0.40
  -5  -8   0    3.80    0.40
   5  -8   0    4.40    0.40
   5  -8   0    3.20    0.40
  -5   8   0    3.00    0.40
   5   8   0    3.00    0.40
  -5   8   0    3.10    0.40
   5   8   0    3.20    0.40
   5   8   0    3.40    0.50
   5   8   0    3.80    0.40
  -5   8   0    3.90    0.40
   5   8   0    4.40    0.50
   6  -8   0   88.29    3.10
  -6  -8   0   90.19    2.90
   6  -8   0   90.59    2.90
   6  -8   0   86.99    3.20
  -6  -8   0   86.19    3.00
   6  -8   0   86.59    3.00
  -6  -8   0   85.49    3.20
   6  -8   0   89.99    2.90
   6   8   0   87.89    3.00
  -6   8   0   88.09    3.00
   6   8   0   93.49    3.30
  -6   8   0   87.69    2.90
   6   8   0   88.59    3.00
  -6   8   0   91.39    3.20
   6   8   0   84.19    3.00
   6   8   0   88.39    2.90
   7  -8   0    9.30    0.60
   7  -8   0    9.50    0.70
  -7  -8   0   10.60    0.70
  -7  -8   0    9.80    0.70
   7  -8   0    8.50    0.70
   7  -8   0    9.60    0.80
   7  -8   0    8.70    0.70
  -7  -8   0   11.30    0.70
   7   8   0   11.30    0.80
   7   8   0    8.80    0.70
   7   8   0   10.50    0.80
  -7   8   0   10.10    0.70
   7   8   0    9.40    0.80
  -7   8   0   11.10    0.80
  -7   8   0    9.20    0.70
  -8  -8   0    8.90    0.70
  -8  -8   0    7.90    0.70
   8  -8   0    8.60    0.60
   8  -8   0    9.50    0.80
   8  -8   0    8.00    0.70
   8  -8   0    9.50    0.80
  -8  -8   0    8.20    0.70
   8  -8   0    8.70    0.80
   8   8   0    9.50    0.80
   8   8   0    6.80    0.70
   8   8   0    7.90    0.80
   8   8   0    8.20    0.80
   8   8   0    9.30    0.80
  -8   8   0    9.60    0.80
  -8   8   0    9.30    0.70
  -9  -8   0   28.10    1.30
   9  -8   0   24.80    1.30
   9  -8   0   22.70    1.40
   9  -8   0   23.40    1.40
   9  -8   0   24.00    1.30
  -9  -8   0   23.90    1.20
   9   8   0   22.10    1.40
   9   8   0   23.20    1.30
  -9   8   0   24.90    1.30
   9   8   0   25.10    1.30
  -9   8   0   25.20    1.30
   9   8   0   22.90    1.30
  10  -8   0   16.30    1.30
 -10  -8   0   14.80    1.10
  10  -8   0   15.80    1.20
 -10   8   0   17.40    1.10
  10   8   0   15.60    1.20
 -10   8   0   17.40    1.10
  10   8   0   14.60    1.20
  11  -8   0   20.10    1.50
 -11  -8   0   18.40    1.30
  11  -8   0   19.40    1.30
 -11   8   0   19.30    1.30
 -11   8   0   17.00    1.20
  11   8   0   18.00    1.30
  11   8   0   20.90    1.40
  12  -8   0    2.00    0.80
  12  -8   0    3.40    0.90
 -12  -8   0    4.30    0.80
  12   8   0    2.20    0.80
  12   8   0    2.70    0.70
 -12   8   0    4.30    0.70
  13  -8   0    0.30    0.80
 -13  -8   0    0.40    0.70
  13   8   0    1.00    0.80
 -13   8   0   -0.20    0.60
  13   8   0    0.30    0.70
 -14  -8   0   -0.70    0.70
  14  -8   0    0.40    0.90
  14   8   0   -1.40    0.80
  14   8   0   -0.80    0.70
 -14   8   0   -0.40    0.70
   0  -9   0    0.00    0.10
   0  -9   0   -0.20    0.20
   0  -9   0    0.10    0.20
   0  -9   0    0.10    0.20
   0   9   0    0.10    0.20
   0   9   0   -0.10    0.20
   0   9   0    0.00    0.20
   0   9   0    0.40    0.20
   0   9   0   -0.10    0.20
   1  -9   0   46.60    1.60
   1  -9   0   48.50    1.60
  -1  -9   0   50.29    1.60
   1  -9   0   44.80    1.70
   1  -9   0   48.10    1.60
  -1  -9   0   48.50    1.60
   1   9   0   47.70    1.60
   1   9   0   48.30    1.60
   1   9   0   46.00    1.60
  -1   9   0   48.70    1.70
  -1   9   0   48.00    1.60
   1   9   0   47.20    1.60
  -1   9   0   48.80    1.50
  -1   9   0   46.90    1.50
   1   9   0   50.79    1.70
  -1   9   0   44.70    1.60
   2  -9   0    0.10    0.20
  -2  -9   0    0.30    0.20
   2  -9   0    0.20    0.20
   2  -9   0    0.10    0.20
   2  -9   0    0.20    0.10
   2  -9   0    0.20    0.20
   2  -9   0    0.20    0.20
  -2  -9   0    0.40    0.20
  -2  -9   0    0.10    0.20
  -2   9   0    0.10    0.20
   2   9   0   -0.30    0.20
  -2   9   0   -0.10    0.20
   2   9   0    0.20    0.20
   2   9   0    0.30    0.20
  -2   9   0    0.20    0.20
   2   9   0    0.20    0.20
  -2   9   0    0.30    0.20
  -2   9   0    0.40    0.20
  -3  -9   0   12.90    0.60
   3  -9   0   13.10    0.70
   3  -9   0   13.40    0.60
  -3  -9   0   13.40    0.60
   3  -9   0   12.50    0.60
   3  -9   0   13.20    0.60
  -3  -9   0   13.00    0.70
   3  -9   0   13.20    0.60
  -3   9   0   11.40    0.60
  -3   9   0   12.60    0.70
  -3   9   0   12.10    0.60
   3   9   0   12.30    0.60
   3   9   0   13.50    0.70
  -3   9   0   12.30    0.60
   3   9   0   11.40    0.60
   3   9   0   12.40    0.70
  -3   9   0   12.70    0.60
   4  -9   0  308.77   10.50
  -4  -9   0  318.07    9.80
   4  -9   0  325.37    9.80
  -4  -9   0  321.27    9.60
   4  -9   0  319.17    9.60
  -4  -9   0  314.97   10.60
   4  -9   0  316.87    9.90
   4  -9   0  321.27   10.50
   4   9   0  314.37    9.60
   4   9   0  314.97    9.90
   4   9   0  329.77   10.60
   4   9   0  310.77    9.80
  -4   9   0  326.27    9.60
  -4   9   0  328.07   10.50
  -4   9   0  310.47    9.60
   4   9   0  315.57    9.80
  -4   9   0  321.07    9.80
   5  -9   0   41.30    1.70
   5  -9   0   43.60    1.60
  -5  -9   0   42.20    1.60
   5  -9   0   46.40    1.60
  -5  -9   0   43.70    1.60
   5  -9   0   42.90    1.60
  -5  -9   0   42.20    1.70
   5  -9   0   42.70    1.60
  -5   9   0   40.80    1.50
   5   9   0   41.90    1.60
  -5   9   0   43.00    1.60
   5   9   0   42.80    1.60
  -5   9   0   43.30    1.70
   5   9   0   42.40    1.60
   5   9   0   43.70    1.80
   5   9   0   42.00    1.60
  -6  -9   0   35.80    1.40
   6  -9   0   36.50    1.40
   6  -9   0   35.70    1.60
   6  -9   0   37.30    1.40
   6  -9   0   35.30    1.40
   6  -9   0   34.40    1.50
  -6  -9   0   35.70    1.50
  -6  -9   0   35.50    1.40
  -6   9   0   35.20    1.40
   6   9   0   37.90    1.40
   6   9   0   34.30    1.50
   6   9   0   36.70    1.40
  -6   9   0   35.90    1.50
   6   9   0   36.20    1.60
  -6   9   0   34.70    1.40
   6   9   0   35.00    1.40
  -7  -9   0   10.10    0.80
   7  -9   0    9.50    0.80
  -7  -9   0   10.40    0.70
   7  -9   0   11.70    0.90
  -7  -9   0   11.00    0.80
   7  -9   0    9.80    0.70
   7  -9   0   10.50    0.60
  -7   9   0    9.60    0.70
   7   9   0   10.50    0.80
   7   9   0   10.00    0.80
  -7   9   0    9.70    0.80
   7   9   0   10.40    0.80
   7   9   0    9.80    0.80
   7   9   0   11.50    0.90
  -7   9   0   10.60    0.80
  -8  -9   0    7.00    0.70
  -8  -9   0    5.70    0.60
   8  -9   0    5.30    0.70
   8  -9   0    6.10    0.70
  -8  -9   0    5.00    0.60
   8  -9   0    6.10    0.70
   8  -9   0    5.50    0.50
   8   9   0    7.00    0.70
   8   9   0    5.40    0.70
   8   9   0    5.60    0.60
  -8   9   0    6.10    0.70
   8   9   0    3.40    0.60
   8   9   0    5.10    0.70
  -8   9   0    6.30    0.60
   9  -9   0    5.90    0.70
  -9  -9   0    8.50    0.80
   9  -9   0    7.30    0.90
  -9  -9   0    6.80    0.70
   9   9   0    6.90    0.80
  -9   9   0    6.50    0.70
  -9   9   0    8.70    0.80
   9   9   0    7.50    0.80
   9   9   0    8.10    0.80
   9   9   0    5.90    0.80
 -10  -9   0    0.90    0.50
  10  -9   0    1.60    0.70
  10  -9   0    1.10    0.60
  10   9   0    0.50    0.60
 -10   9   0    1.40    0.60
 -10   9   0    1.70    0.60
  10   9   0    2.00    0.60
  11  -9   0    2.10    0.80
  11  -9   0    2.30    0.70
 -11  -9   0    1.80    0.60
  11   9   0    2.20    0.80
 -11   9   0    1.10    0.60
  11   9   0    0.70    0.60
 -11   9   0    2.20    0.60
  12  -9   0    0.10    0.70
 -12  -9   0    1.40    0.60
  12  -9   0    1.10    0.80
  12   9   0    0.40    0.70
 -12   9   0    0.50    0.60
  12   9   0    0.20    0.60
 -12   9   0    1.40    0.70
  13  -9   0    0.30    0.80
 -13  -9   0    1.20    0.70
 -13   9   0    0.60    0.60
  13   9   0    1.80    0.70
  13   9   0    0.80    0.70
 -14  -9   0   -0.60    0.70
  14  -9   0    1.00    0.90
  14   9   0    0.30    0.80
  14   9   0    0.80    0.90
 -14   9   0   -1.20    0.60
   0 -10   0   35.70    1.20
   0 -10   0   35.10    1.20
   0 -10   0   33.70    1.40
   0 -10   0   34.50    1.20
   0  10   0   35.70    1.30
   0  10   0   33.30    1.20
   0  10   0   33.70    1.30
   0  10   0   32.20    1.20
   0  10   0   36.50    1.20
   1 -10   0   11.90    0.60
   1 -10   0   12.00    0.50
   1 -10   0   13.10    0.60
   1 -10   0   12.90    0.60
  -1 -10   0   12.30    0.60
  -1 -10   0   11.90    0.60
  -1  10   0   12.20    0.50
   1  10   0   12.80    0.60
  -1  10   0   12.90    0.60
  -1  10   0   11.50    0.70
   1  10   0   12.10    0.60
   1  10   0   12.70    0.60
  -1  10   0   12.40    0.60
   1  10   0   12.90    0.70
   1  10   0   11.40    0.60
  -1  10   0   12.90    0.50
   2 -10   0    0.40    0.20
   2 -10   0    0.50    0.20
  -2 -10   0    0.60    0.30
  -2 -10   0    0.20    0.20
   2 -10   0    0.50    0.20
   2 -10   0    0.20    0.30
  -2 -10   0    0.10    0.20
   2 -10   0    0.60    0.20
   2 -10   0    0.10    0.20
  -2  10   0    0.30    0.20
   2  10   0    0.00    0.30
  -2  10   0    0.50    0.20
   2  10   0    0.50    0.20
   2  10   0    0.60    0.20
   2  10   0    0.20    0.30
  -2  10   0    0.30    0.20
  -2  10   0    0.40    0.20
  -3 -10   0  189.78    5.90
   3 -10   0  194.08    6.50
   3 -10   0  198.28    5.90
   3 -10   0  192.38    6.10
   3 -10   0  202.18    6.10
  -3 -10   0  192.88    6.00
   3 -10   0  195.78    6.00
  -3 -10   0  192.58    6.60
   3 -10   0  200.88    6.10
  -3  10   0  194.78    6.50
  -3  10   0  192.88    5.90
   3  10   0  190.58    6.10
  -3  10   0  203.18    5.90
  -3  10   0  188.88    6.00
   3  10   0  186.58    5.90
  -3  10   0  184.98    6.10
   3  10   0  194.48    6.10
   3  10   0  195.98    6.50
  -4 -10   0   29.00    1.30
  -4 -10   0   29.40    1.20
   4 -10   0   29.90    1.20
   4 -10   0   30.10    1.20
  -4 -10   0   30.40    1.20
   4 -10   0   31.80    1.20
   4 -10   0   30.60    1.20
   4 -10   0   31.00    1.10
   4  10   0   29.90    1.20
   4  10   0   31.30    1.30
  -4  10   0   30.20    1.30
  -4  10   0   30.60    1.10
   4  10   0   29.90    1.20
  -4  10   0   31.20    1.20
  -4  10   0   30.50    1.10
   4  10   0   32.00    1.30
   5 -10   0    8.20    0.60
  -5 -10   0    8.00    0.60
   5 -10   0    8.90    0.70
  -5 -10   0    9.00    0.60
   5 -10   0    8.20    0.60
   5 -10   0    9.20    0.60
  -5 -10   0    7.60    0.60
   5 -10   0    9.00    0.60
   5  10   0    8.60    0.60
  -5  10   0    9.10    0.70
  -5  10   0    8.80    0.60
   5  10   0    8.30    0.60
   5  10   0    8.00    0.60
  -5  10   0    9.70    0.60
   5  10   0    8.90    0.70
   5  10   0    8.00    0.70
   6 -10   0   26.60    1.10
   6 -10   0   25.50    1.10
  -6 -10   0   24.30    1.10
   6 -10   0   23.40    1.20
  -6 -10   0   25.50    1.10
   6 -10   0   26.30    1.10
  -6 -10   0   25.90    1.20
   6 -10   0   24.10    1.30
  -6  10   0   26.60    1.20
   6  10   0   25.70    1.30
   6  10   0   25.70    1.20
  -6  10   0   25.40    1.10
  -6  10   0   25.40    1.10
   6  10   0   24.80    1.10
   6  10   0   26.40    1.20
   6  10   0   27.60    1.20
  -7 -10   0    5.00    0.60
   7 -10   0    6.00    0.70
  -7 -10   0    6.50    0.60
   7 -10   0    6.20    0.70
  -7 -10   0    6.80    0.60
   7 -10   0    7.00    0.60
   7 -10   0    6.30    0.50
   7  10   0    5.30    0.60
  -7  10   0    5.40    0.60
   7  10   0    5.70    0.60
   7  10   0    5.90    0.60
   7  10   0    5.70    0.60
   7  10   0    7.00    0.70
  -7  10   0    5.80    0.60
   8 -10   0   81.59    2.90
   8 -10   0   84.69    2.90
   8 -10   0   78.39    3.20
  -8 -10   0   82.69    2.90
   8 -10   0   80.19    3.00
  -8 -10   0   80.09    3.10
   8  10   0   86.39    3.00
   8  10   0   82.69    2.90
   8  10   0   84.79    3.00
  -8  10   0   83.29    2.90
  -8  10   0   83.99    2.80
   8  10   0   78.69    3.00
  -9 -10   0    5.90    0.70
   9 -10   0    6.80    0.80
   9 -10   0    7.00    0.90
  -9 -10   0    6.00    0.70
  -9  10   0    5.60    0.70
   9  10   0    5.20    0.80
   9  10   0    6.70    0.80
   9  10   0    5.60    0.70
  -9  10   0    6.90    0.80
   9  10   0    5.30    0.70
 -10 -10   0   11.70    0.90
 -10 -10   0   12.70    1.00
  10 -10   0   12.20    1.10
  10 -10   0   13.00    1.20
  10  10   0   11.20    1.00
  10  10   0   13.50    1.10
 -10  10   0   12.50    1.00
 -10  10   0   12.40    0.90
  11 -10   0    2.10    0.70
 -11 -10   0    2.10    0.60
  11 -10   0    1.70    0.80
 -11  10   0    2.00    0.60
 -11  10   0    2.00    0.70
  11  10   0    1.20    0.60
  11  10   0    1.80    0.80
  12 -10   0    2.60    0.90
 -12 -10   0    3.60    0.80
  12 -10   0    3.90    0.80
 -12  10   0    3.80    0.80
  12  10   0    3.00    0.90
  12  10   0    3.20    0.80
 -12  10   0    5.20    0.80
  13 -10   0    4.10    1.00
 -13 -10   0    6.80    0.90
  13  10   0    4.50    0.90
  13  10   0    5.30    1.10
 -13  10   0    5.80    0.80
 -14 -10   0    0.30    0.80
  14 -10   0    0.50    0.90
 -14  10   0   -0.40    0.70
  14  10   0    0.30    0.80
  14  10   0    1.60    1.00
   0 -11   0    0.30    0.20
   0 -11   0   -0.10    0.20
   0 -11   0   -0.20    0.20
   0 -11   0   -0.20    0.20
   0  11   0    0.20    0.20
   0  11   0   -0.40    0.20
   0  11   0    0.00    0.20
   0  11   0   -0.20    0.20
   0  11   0    0.50    0.30
   1 -11   0  257.97    9.00
   1 -11   0  279.07    8.30
   1 -11   0  277.37    8.20
  -1 -11   0  271.47    8.30
   1 -11   0  273.37    8.40
  -1 -11   0  271.87    8.20
   1  11   0  258.07    8.10
   1  11   0  282.37    8.90
  -1  11   0  280.27    8.10
   1  11   0  264.57    8.40
  -1  11   0  258.67    8.30
  -1  11   0  262.37    8.10
  -1  11   0  274.27    8.40
   1  11   0  277.77    8.10
   1  11   0  263.57    8.30
   2 -11   0    1.30    0.30
  -2 -11   0    0.70    0.20
   2 -11   0    0.90    0.30
   2 -11   0    1.00    0.20
   2 -11   0    0.90    0.30
  -2 -11   0    0.90    0.30
  -2 -11   0    1.00    0.30
   2 -11   0    1.20    0.20
   2 -11   0    1.10    0.20
  -2  11   0    1.00    0.20
  -2  11   0    0.60    0.20
  -2  11   0    1.00    0.30
   2  11   0    0.90    0.20
   2  11   0    1.40    0.30
   2  11   0    0.90    0.30
   2  11   0    1.10    0.30
  -2  11   0    1.00    0.30
   3 -11   0   54.39    1.80
   3 -11   0   53.09    1.70
  -3 -11   0   50.19    2.00
   3 -11   0   52.39    1.90
   3 -11   0   53.19    1.80
   3 -11   0   51.99    1.80
  -3 -11   0   53.19    1.80
  -3 -11   0   51.19    1.80
   3 -11   0   49.90    1.80
   3  11   0   49.90    2.00
  -3  11   0   52.39    1.90
  -3  11   0   49.20    1.70
  -3  11   0   49.40    1.80
   3  11   0   50.99    1.90
   3  11   0   50.59    1.80
  -3  11   0   54.19    1.70
   3  11   0   49.60    1.80
  -3  11   0   51.09    1.80
   4 -11   0   13.90    0.70
   4 -11   0   15.10    0.70
  -4 -11   0   15.20    0.90
   4 -11   0   16.30    0.80
  -4 -11   0   15.80    0.80
   4 -11   0   15.10    0.80
   4 -11   0   14.10    0.70
  -4 -11   0   14.70    0.70
  -4  11   0   14.50    0.70
  -4  11   0   15.10    0.80
  -4  11   0   14.90    0.70
   4  11   0   16.00    0.80
   4  11   0   16.20    0.80
   4  11   0   15.60    0.90
   4  11   0   16.70    0.80
  -4  11   0   14.20    0.70
  -4  11   0   16.30    0.80
  -5 -11   0    9.80    0.70
   5 -11   0    8.30    0.60
   5 -11   0   10.40    0.70
   5 -11   0    9.00    0.70
   5 -11   0   10.00    0.60
  -5 -11   0    9.10    0.60
  -5 -11   0    9.90    0.70
   5 -11   0    9.00    0.70
   5  11   0    9.90    0.80
  -5  11   0    8.40    0.60
   5  11   0    9.40    0.70
  -5  11   0    9.90    0.60
  -5  11   0    9.40    0.70
   5  11   0    8.80    0.70
   5  11   0    8.70    0.70
  -5  11   0   10.20    0.70
   6 -11   0   14.50    0.80
  -6 -11   0   13.00    0.80
  -6 -11   0   12.10    0.80
   6 -11   0   11.70    0.80
  -6 -11   0   11.80    0.70
   6 -11   0   12.80    0.70
   6 -11   0   12.80    0.90
   6 -11   0   12.60    0.70
  -6  11   0   12.20    0.80
  -6  11   0   11.90    0.80
   6  11   0   11.90    0.90
   6  11   0   11.40    0.90
   6  11   0   12.00    0.80
  -6  11   0   10.30    0.70
   6  11   0   11.90    0.80
   6  11   0   12.40    0.80
  -7 -11   0    1.30    0.40
   7 -11   0    0.80    0.40
   7 -11   0    1.30    0.50
  -7 -11   0    1.10    0.40
   7 -11   0    1.70    0.40
   7 -11   0    0.50    0.50
  -7 -11   0    0.90    0.40
  -7  11   0    1.00    0.40
   7  11   0    0.70    0.40
   7  11   0    0.80    0.40
  -7  11   0    1.60    0.40
   7  11   0    1.10    0.40
   7  11   0    1.10    0.50
   7  11   0    0.70    0.50
  -8 -11   0    5.90    0.70
   8 -11   0    6.70    0.80
   8 -11   0    6.10    0.80
   8 -11   0    5.00    0.70
  -8 -11   0    6.30    0.70
   8  11   0    4.80    0.70
  -8  11   0    6.60    0.60
  -8  11   0    6.10    0.70
   8  11   0    5.60    0.70
   8  11   0    5.70    0.70
   8  11   0    6.10    0.70
   9 -11   0    9.90    1.00
  -9 -11   0   12.30    0.90
   9 -11   0   12.00    1.00
  -9 -11   0   11.40    0.90
   9  11   0   10.10    0.90
  -9  11   0   11.70    0.90
   9  11   0   10.80    1.00
   9  11   0    9.30    0.90
  -9  11   0   11.70    0.90
   9  11   0   10.00    0.90
  10 -11   0    0.50    0.70
 -10 -11   0    0.20    0.50
 -10 -11   0   -0.50    0.40
  10 -11   0   -0.40    0.60
  10  11   0    0.00    0.50
  10  11   0   -0.50    0.60
 -10  11   0   -0.40    0.50
 -10  11   0   -0.10    0.50
  11 -11   0   -0.10    0.70
  11 -11   0   -0.40    0.60
 -11 -11   0   -0.40    0.50
  11  11   0   -0.20    0.60
 -11  11   0   -0.30    0.50
 -11  11   0   -0.30    0.50
  11  11   0    0.80    0.70
  12 -11   0    0.60    0.80
 -12 -11   0    2.30    0.70
  12 -11   0    1.10    0.80
  12  11   0    1.80    0.70
 -12  11   0    2.10    0.70
 -12  11   0    2.50    0.70
  12  11   0    1.30    0.70
 -13 -11   0   -0.30    0.70
  13 -11   0    1.10    0.80
 -13  11   0    0.10    0.60
  13  11   0    0.60    0.70
  13  11   0    1.50    0.80
  14 -11   0    0.10    0.80
  14  11   0    1.40    1.00
 -14  11   0    1.50    0.70
  14  11   0    0.80    0.80
   0 -12   0   38.70    1.30
   0 -12   0   38.20    1.30
   0 -12   0   35.10    1.50
   0 -12   0   38.80    1.30
   0  12   0   37.10    1.50
   0  12   0   38.30    1.30
   0  12   0   35.70    1.40
   0  12   0   36.50    1.30
   0  12   0   35.40    1.30
   1 -12   0   23.70    1.00
   1 -12   0   22.70    0.90
   1 -12   0   23.40    0.90
  -1 -12   0   22.00    0.90
   1 -12   0   23.90    0.90
  -1 -12   0   22.60    0.90
  -1  12   0   22.20    0.90
   1  12   0   23.90    1.00
   1  12   0   21.30    0.90
   1  12   0   21.40    0.90
   1  12   0   21.70    0.90
  -1  12   0   22.10    1.00
  -1  12   0   22.40    0.90
  -1  12   0   23.70    0.90
   1  12   0   22.40    0.90
   2 -12   0    1.70    0.30
  -2 -12   0    1.80    0.30
  -2 -12   0    1.90    0.30
   2 -12   0    1.60    0.30
   2 -12   0    1.70    0.40
  -2 -12   0    1.50    0.30
   2 -12   0    2.10    0.20
   2 -12   0    1.20    0.30
   2 -12   0    2.00    0.30
  -2  12   0    1.90    0.30
  -2  12   0    1.70    0.30
   2  12   0    1.60    0.30
  -2  12   0    2.00    0.40
  -2  12   0    1.70    0.30
   2  12   0    1.40    0.40
   2  12   0    1.30    0.30
   2  12   0    1.90    0.40
   3 -12   0   27.50    1.10
   3 -12   0   29.30    1.00
   3 -12   0   28.80    1.10
  -3 -12   0   27.40    1.10
   3 -12   0   27.40    1.10
   3 -12   0   28.00    1.20
   3 -12   0   27.90    1.10
  -3 -12   0   28.90    1.10
  -3 -12   0   26.00    1.20
  -3  12   0   29.50    1.10
   3  12   0   29.00    1.20
  -3  12   0   28.90    1.10
  -3  12   0   27.40    1.20
   3  12   0   27.30    1.10
  -3  12   0   28.00    1.10
  -3  12   0   26.80    1.20
   3  12   0   27.60    1.20
   3  12   0   26.30    1.10
  -4 -12   0   26.10    1.20
   4 -12   0   25.40    1.00
   4 -12   0   24.60    1.10
   4 -12   0   26.10    1.10
  -4 -12   0   24.40    1.10
   4 -12   0   25.40    1.10
  -4 -12   0   26.10    1.00
   4 -12   0   26.40    1.00
   4  12   0   24.00    1.00
  -4  12   0   24.70    1.10
  -4  12   0   26.00    1.10
   4  12   0   25.60    1.20
  -4  12   0   25.30    1.00
   4  12   0   24.80    1.10
  -4  12   0   25.60    1.20
  -4  12   0   27.20    1.00
   4  12   0   25.10    1.10
   5 -12   0    0.00    0.40
   5 -12   0   -0.30    0.30
   5 -12   0    0.40    0.30
  -5 -12   0   -0.10    0.30
  -5 -12   0    0.30    0.30
   5 -12   0   -0.50    0.30
  -5 -12   0   -0.40    0.30
   5 -12   0    0.40    0.30
   5  12   0    0.20    0.30
  -5  12   0    0.00    0.30
   5  12   0    0.00    0.40
  -5  12   0    0.20    0.30
  -5  12   0    0.20    0.20
   5  12   0    0.10    0.30
  -5  12   0    0.30    0.30
   5  12   0    0.40    0.40
   6 -12   0   17.80    1.10
  -6 -12   0   19.90    1.10
  -6 -12   0   20.50    1.00
   6 -12   0   21.40    1.00
  -6 -12   0   17.70    1.00
   6 -12   0   20.80    1.00
   6 -12   0   17.20    1.00
  -6  12   0   19.90    1.00
  -6  12   0   19.80    0.90
   6  12   0   20.10    1.00
   6  12   0   18.20    1.10
   6  12   0   20.50    1.00
   6  12   0   19.50    1.00
   7 -12   0   11.80    0.90
  -7 -12   0   14.20    0.90
   7 -12   0   12.00    0.90
  -7 -12   0   13.30    0.90
   7 -12   0   11.90    1.00
   7 -12   0   12.50    0.80
   7  12   0   13.70    0.90
   7  12   0   14.20    0.90
  -7  12   0   14.70    0.90
   7  12   0   13.30    1.00
   7  12   0   12.20    1.00
  -7  12   0   12.40    0.80
  -8 -12   0   54.29    2.20
   8 -12   0   52.39    2.20
  -8 -12   0   53.29    2.10
   8 -12   0   52.69    2.30
  -8  12   0   52.09    2.10
  -8  12   0   55.09    2.00
   8  12   0   55.79    2.20
   8  12   0   53.99    2.10
   8  12   0   53.49    2.20
   8  12   0   53.49    2.10
  -9 -12   0    2.90    0.60
   9 -12   0    2.90    0.70
  -9 -12   0    3.10    0.60
   9 -12   0    2.10    0.70
  -9  12   0    4.00    0.70
   9  12   0    2.10    0.60
   9  12   0    3.10    0.60
   9  12   0    3.00    0.70
  -9  12   0    2.30    0.50
  10 -12   0   -0.30    0.60
  10 -12   0    0.40    0.60
 -10 -12   0    0.40    0.50
 -10 -12   0    0.20    0.50
  10  12   0   -0.70    0.60
 -10  12   0    0.00    0.50
 -10  12   0   -0.40    0.50
  10  12   0   -0.20    0.50
 -11 -12   0   -0.20    0.50
  11 -12   0    1.00    0.70
  11 -12   0   -0.50    0.60
  11  12   0    1.60    0.60
  11  12   0    0.70    0.70
 -11  12   0    0.30    0.60
 -11  12   0   -0.20    0.60
 -12 -12   0    0.20    0.60
  12 -12   0   -0.40    0.70
  12 -12   0    0.20    0.80
  12  12   0   -1.30    0.70
 -12  12   0   -0.40    0.60
 -12  12   0   -0.10    0.60
  12  12   0   -0.40    0.60
  13 -12   0    0.30    0.80
 -13  12   0    1.50    0.70
  13  12   0    1.00    0.70
  13  12   0    1.90    1.00
   0 -13   0   -0.30    0.20
   0 -13   0    0.00    0.20
   0 -13   0    0.00    0.30
   0 -13   0    0.10    0.20
   0  13   0    0.30    0.30
   0  13   0   -0.10    0.20
   0  13   0   -0.70    0.30
   0  13   0    0.10    0.20
   0  13   0   -0.20    0.30
  -1 -13   0  227.98    6.80
   1 -13   0  211.28    7.50
   1 -13   0  222.98    7.00
  -1 -13   0  223.58    6.90
   1 -13   0  225.68    6.90
   1 -13   0  228.68    6.80
   1  13   0  229.28    7.40
   1  13   0  227.18    6.80
   1  13   0  213.48    6.90
   1  13   0  216.48    6.80
   1  13   0  224.98    7.00
  -1  13   0  220.98    7.00
  -1  13   0  219.48    6.90
  -1  13   0  216.68    6.70
  -1  13   0  231.58    6.80
  -2 -13   0    7.90    0.60
   2 -13   0    8.20    0.50
  -2 -13   0    7.80    0.50
   2 -13   0    8.30    0.60
   2 -13   0    7.40    0.50
   2 -13   0    9.40    0.50
   2 -13   0    8.80    0.60
  -2 -13   0    8.40    0.50
   2 -13   0    8.70    0.50
   2  13   0    8.40    0.50
   2  13   0    8.30    0.60
  -2  13   0    8.10    0.50
  -2  13   0    8.00    0.50
   2  13   0    8.80    0.70
   2  13   0    8.90    0.60
   2  13   0    8.00    0.60
  -2  13   0    7.80    0.60
  -2  13   0    9.30    0.60
   3 -13   0   13.60    0.70
  -3 -13   0   12.80    0.70
   3 -13   0   13.20    0.70
  -3 -13   0   13.80    0.70
   3 -13   0   12.90    0.80
   3 -13   0   13.30    0.50
  -3 -13   0   12.50    0.80
   3 -13   0   12.90    0.60
   3 -13   0   13.90    0.80
   3  13   0   12.60    0.70
  -3  13   0   12.50    0.60
   3  13   0   13.20    0.80
  -3  13   0   13.00    0.70
  -3  13   0   14.80    0.80
   3  13   0   11.60    0.70
   3  13   0   12.40    0.80
  -3  13   0   11.80    0.70
  -4 -13   0   22.20    1.00
   4 -13   0   21.40    1.00
   4 -13   0   20.70    1.00
  -4 -13   0   21.60    1.00
  -4 -13   0   20.70    1.10
   4 -13   0   22.10    0.90
   4 -13   0   21.20    0.90
   4 -13   0   20.90    1.00
  -4  13   0   21.40    0.90
  -4  13   0   21.70    1.00
  -4  13   0   22.50    1.10
   4  13   0   22.40    1.10
  -4  13   0   22.20    1.00
   4  13   0   21.60    1.00
  -4  13   0   23.60    0.90
   4  13   0   20.70    1.00
   4  13   0   22.80    1.00
  -5 -13   0  158.68    5.10
   5 -13   0  155.68    5.20
   5 -13   0  160.08    5.10
   5 -13   0  160.28    5.10
  -5 -13   0  160.58    5.60
  -5 -13   0  166.88    5.10
   5 -13   0  165.88    5.50
  -5  13   0  163.48    5.00
  -5  13   0  153.08    5.00
   5  13   0  159.38    5.20
   5  13   0  160.28    5.00
  -5  13   0  162.18    5.50
   5  13   0  153.48    5.20
   5  13   0  168.28    5.60
  -5  13   0  158.68    5.10
   6 -13   0    4.40    0.60
  -6 -13   0    3.80    0.50
  -6 -13   0    4.10    0.50
   6 -13   0    4.50    0.60
   6 -13   0    5.20    0.50
  -6 -13   0    4.80    0.50
   6 -13   0    4.90    0.50
   6  13   0    3.50    0.60
  -6  13   0    4.20    0.50
   6  13   0    3.60    0.50
  -6  13   0    3.80    0.50
   6  13   0    3.80    0.50
   6  13   0    4.10    0.60
   7 -13   0   19.50    1.10
  -7 -13   0   19.30    1.10
   7 -13   0   17.80    1.10
  -7 -13   0   17.80    1.10
   7 -13   0   18.00    1.00
   7 -13   0   20.00    1.20
   7  13   0   19.10    1.10
  -7  13   0   20.60    1.10
  -7  13   0   19.20    1.00
   7  13   0   17.80    1.10
   7  13   0   20.20    1.10
  -8 -13   0   19.40    1.20
  -8 -13   0   20.50    1.20
   8 -13   0   20.30    1.30
   8 -13   0   22.50    1.30
  -8  13   0   20.80    1.10
   8  13   0   20.70    1.20
   8  13   0   21.50    1.30
   8  13   0   20.90    1.20
  -8  13   0   20.90    1.20
  -9 -13   0    2.20    0.60
   9 -13   0    2.50    0.70
  -9 -13   0    1.80    0.50
   9 -13   0    2.10    0.70
   9  13   0    1.80    0.60
   9  13   0    1.40    0.70
   9  13   0    1.10    0.60
  -9  13   0    2.00    0.60
  -9  13   0    2.20    0.50
 -10 -13   0   13.10    1.00
  10 -13   0   10.00    1.00
  10 -13   0   12.50    1.20
 -10 -13   0   12.20    0.90
 -10  13   0   10.90    1.00
  10  13   0   10.70    1.00
 -10  13   0   11.00    0.90
  10  13   0    8.60    1.00
  11 -13   0   -0.60    0.60
  11 -13   0    0.10    0.70
 -11 -13   0    0.60    0.60
  11  13   0    1.00    0.60
  11  13   0   -0.70    0.70
 -11  13   0    0.10    0.50
 -11  13   0   -0.60    0.60
  12 -13   0    3.50    0.90
  12 -13   0    3.00    0.90
 -12  13   0    1.30    0.70
  12  13   0    1.60    0.70
  12  13   0    3.10    0.90
 -12  13   0    2.30    0.70
  13 -13   0   -1.10    0.80
 -13  13   0    0.90    0.60
  13  13   0    0.10    0.80
  13  13   0   -0.20    0.70
   0 -14   0   26.10    1.00
   0 -14   0   25.10    1.00
   0 -14   0   25.40    1.00
   0 -14   0   23.40    1.10
   0  14   0   24.30    1.00
   0  14   0   24.50    1.10
   0  14   0   26.60    1.00
   0  14   0   24.40    1.00
   1 -14   0   79.59    2.50
  -1 -14   0   73.79    2.50
   1 -14   0   77.19    2.50
   1 -14   0   71.79    2.80
  -1 -14   0   76.59    2.50
  -1 -14   0   73.29    2.80
   1 -14   0   74.99    2.50
  -1  14   0   75.89    2.60
  -1  14   0   75.89    2.40
   1  14   0   78.29    2.40
   1  14   0   77.69    2.70
  -1  14   0   77.99    2.40
  -1  14   0   75.29    2.50
   1  14   0   76.19    2.60
   1  14   0   73.89    2.50
   1  14   0   69.69    2.40
   2 -14   0  477.25   16.10
  -2 -14   0  486.85   16.10
  -2 -14   0  474.05   14.80
   2 -14   0  489.85   14.60
   2 -14   0  488.65   14.80
   2 -14   0  500.35   15.00
  -2 -14   0  481.55   14.60
   2 -14   0  489.65   15.00
   2  14   0  499.25   14.60
   2  14   0  482.55   14.90
   2  14   0  495.55   15.90
  -2  14   0  475.85   14.90
   2  14   0  472.55   14.50
  -2  14   0  479.35   14.50
  -2  14   0  474.35   14.80
   2  14   0  483.95   15.00
  -2  14   0  505.75   14.50
   3 -14   0   35.10    1.30
  -3 -14   0   33.80    1.50
  -3 -14   0   33.90    1.30
   3 -14   0   35.90    1.50
   3 -14   0   34.70    1.40
   3 -14   0   35.90    1.30
  -3 -14   0   36.00    1.30
   3 -14   0   36.40    1.20
   3 -14   0   36.00    1.30
  -3  14   0   33.00    1.30
   3  14   0   37.50    1.50
   3  14   0   36.40    1.40
   3  14   0   34.20    1.40
  -3  14   0   34.80    1.40
  -3  14   0   37.40    1.30
   3  14   0   34.90    1.30
  -3  14   0   35.40    1.30
   4 -14   0   44.40    1.70
   4 -14   0   43.00    1.70
  -4 -14   0   42.20    1.80
  -4 -14   0   44.60    1.60
   4 -14   0   45.20    1.60
   4 -14   0   43.40    1.60
  -4 -14   0   45.00    1.60
   4 -14   0   43.30    1.60
   4  14   0   42.90    1.60
   4  14   0   43.90    1.80
  -4  14   0   43.20    1.60
  -4  14   0   42.90    1.60
  -4  14   0   46.60    1.60
   4  14   0   44.20    1.70
  -4  14   0   46.40    1.90
  -4  14   0   41.10    1.70
   4  14   0   42.80    1.70
  -5 -14   0   15.00    0.80
   5 -14   0   14.70    0.80
  -5 -14   0   16.80    1.00
  -5 -14   0   14.40    0.80
   5 -14   0   13.80    0.90
   5 -14   0   15.00    0.90
  -5  14   0   14.70    1.00
   5  14   0   14.90    1.00
   5  14   0   14.30    0.90
   5  14   0   16.20    0.90
  -5  14   0   13.90    0.80
   5  14   0   14.00    0.80
  -5  14   0   13.40    0.80
  -5  14   0   14.30    0.80
  -6 -14   0   68.19    2.70
   6 -14   0   70.39    2.60
   6 -14   0   75.69    2.70
  -6 -14   0   72.29    2.50
   6 -14   0   71.59    2.50
   6 -14   0   72.19    2.80
   6  14   0   70.69    2.50
  -6  14   0   74.79    2.60
   6  14   0   71.09    2.60
   6  14   0   71.29    2.90
  -6  14   0   69.09    2.40
   6  14   0   68.79    2.60
  -7 -14   0    7.60    0.70
   7 -14   0    7.60    0.80
  -7 -14   0    8.50    0.80
   7 -14   0    8.30    0.80
   7 -14   0    7.70    0.60
  -7  14   0    7.60    0.60
   7  14   0    7.40    0.70
  -7  14   0    8.20    0.70
   7  14   0    8.00    0.80
   7  14   0    7.90    0.80
   8 -14   0    0.10    0.60
   8 -14   0    1.80    0.60
  -8 -14   0    1.30    0.50
  -8 -14   0    0.80    0.50
   8  14   0    2.00    0.60
  -8  14   0    1.20    0.50
   8  14   0    1.10    0.50
   8  14   0    0.90    0.60
  -8  14   0    0.70    0.50
   9 -14   0    1.50    0.60
  -9 -14   0    0.90    0.50
   9 -14   0    0.70    0.60
  -9 -14   0    0.30    0.50
   9  14   0    1.10    0.60
  -9  14   0    0.90    0.50
   9  14   0    1.00    0.60
   9  14   0   -0.30    0.50
  -9  14   0    1.20    0.60
  10 -14   0    0.00    0.50
  10 -14   0    0.80    0.70
 -10 -14   0    0.50    0.50
 -10 -14   0    0.70    0.50
  10  14   0    0.30    0.70
 -10  14   0   -0.20    0.60
  10  14   0    0.50    0.60
 -10  14   0   -0.20    0.50
  11 -14   0    1.20    0.70
  11 -14   0    0.80    0.80
  11  14   0    1.40    0.70
  11  14   0    0.80    0.80
 -11  14   0    0.70    0.60
 -11  14   0    1.40    0.70
  12 -14   0    0.50    0.80
  12 -14   0    0.30    0.80
  12  14   0    0.90    0.70
 -12  14   0   -0.10    0.70
 -12  14   0    0.00    0.60
  12  14   0    0.50    0.80
  13 -14   0    4.60    1.00
 -13  14   0    4.60    0.80
  13  14   0    3.70    0.90
  13  14   0    3.00    1.00
   0 -15   0   -0.30    0.20
   0 -15   0    0.20    0.30
   0 -15   0   -0.30    0.30
   0 -15   0   -0.10    0.20
   0  15   0   -0.30    0.30
   0  15   0   -0.30    0.20
   0  15   0   -0.20    0.30
   0  15   0    0.20    0.20
  -1 -15   0   55.69    1.90
  -1 -15   0   57.89    2.20
   1 -15   0   56.09    2.20
  -1 -15   0   54.49    1.90
   1 -15   0   56.79    1.90
   1 -15   0   57.99    2.00
   1 -15   0   57.99    1.90
  -1  15   0   56.49    2.00
   1  15   0   57.99    2.10
   1  15   0   54.49    2.00
   1  15   0   54.29    2.00
  -1  15   0   56.79    1.90
  -1  15   0   55.29    1.90
   1  15   0   54.59    1.90
  -1  15   0   54.49    2.00
   1  15   0   58.19    1.90
  -2 -15   0   16.40    0.80
   2 -15   0   17.20    0.90
   2 -15   0   16.70    0.80
   2 -15   0   18.10    0.80
  -2 -15   0   15.20    0.90
  -2 -15   0   16.20    0.80
   2  15   0   18.40    0.80
   2  15   0   15.80    0.90
  -2  15   0   17.00    0.80
   2  15   0   16.00    0.90
   2  15   0   16.20    0.80
   2  15   0   15.40    0.80
  -2  15   0   16.30    0.70
  -2  15   0   16.70    0.80
  -2  15   0   16.90    0.90
  -3 -15   0    4.90    0.50
   3 -15   0    5.00    0.50
   3 -15   0    4.80    0.30
   3 -15   0    4.30    0.40
  -3 -15   0    5.10    0.60
   3 -15   0    5.30    0.60
  -3 -15   0    5.00    0.40
   3 -15   0    4.60    0.50
   3  15   0    5.30    0.60
  -3  15   0    4.20    0.40
   3  15   0    4.90    0.50
  -3  15   0    4.30    0.50
   3  15   0    4.80    0.40
  -3  15   0    4.90    0.50
  -3  15   0    5.90    0.40
   3  15   0    5.10    0.50
   4 -15   0    8.30    0.70
   4 -15   0    8.30    0.30
  -4 -15   0    7.50    0.60
   4 -15   0    7.10    0.70
  -4 -15   0    7.90    0.60
   4 -15   0    8.20    0.60
  -4 -15   0    7.50    0.70
   4 -15   0    8.00    0.60
  -4  15   0    8.30    0.60
  -4  15   0    8.70    0.70
  -4  15   0    7.60    0.60
   4  15   0    7.00    0.60
   4  15   0    8.00    0.70
  -4  15   0    7.60    0.50
   4  15   0    8.30    0.70
   4  15   0    7.30    0.60
   5 -15   0   -0.10    0.40
   5 -15   0    0.10    0.30
   5 -15   0    0.00    0.30
  -5 -15   0    0.20    0.40
  -5 -15   0   -0.10    0.30
  -5 -15   0    0.50    0.40
   5  15   0    0.20    0.40
   5  15   0    0.10    0.40
   5  15   0    0.60    0.50
  -5  15   0    0.10    0.30
  -5  15   0    0.50    0.40
   5  15   0    0.50    0.40
  -5  15   0    0.30    0.30
   6 -15   0    4.40    0.60
   6 -15   0    4.90    0.60
   6 -15   0    5.60    0.70
  -6 -15   0    5.70    0.70
  -6 -15   0    4.40    0.60
  -6  15   0    6.20    0.60
   6  15   0    5.40    0.60
  -6  15   0    5.30    0.50
   6  15   0    4.40    0.70
   6  15   0    4.60    0.60
  -7 -15   0    8.00    0.80
   7 -15   0    6.70    0.70
  -7 -15   0    6.60    0.70
   7 -15   0    6.40    0.80
   7 -15   0    7.30    0.80
   7  15   0    6.30    0.70
   7  15   0    6.30    0.80
  -7  15   0    6.60    0.60
   7  15   0    7.00    0.70
  -7  15   0    6.60    0.70
   8 -15   0    5.30    0.80
   8 -15   0    6.40    0.80
  -8 -15   0    7.30    0.80
  -8 -15   0    7.40    0.80
   8  15   0    7.00    0.90
  -8  15   0    8.10    0.80
   8  15   0    7.10    0.70
   8  15   0    6.30    0.80
  -8  15   0    7.40    0.70
  -9 -15   0    3.50    0.70
  -9 -15   0    4.90    0.70
   9 -15   0    3.00    0.60
   9 -15   0    3.20    0.80
   9  15   0    3.40    0.80
   9  15   0    4.10    0.70
  -9  15   0    2.70    0.60
   9  15   0    3.50    0.70
  -9  15   0    1.90    0.60
  10 -15   0    4.00    0.80
 -10 -15   0    3.30    0.70
  10 -15   0    3.30    0.80
 -10  15   0    3.80    0.70
 -10  15   0    3.20    0.60
  10  15   0    2.30    0.70
  10  15   0    4.50    0.90
  11 -15   0   -0.10    0.70
  11 -15   0    1.20    0.70
 -11  15   0    0.30    0.60
 -11  15   0    0.20    0.70
  11  15   0    0.30    0.80
  11  15   0    1.10    0.70
  12 -15   0    2.60    0.90
  12 -15   0    1.40    0.90
  12  15   0    1.50    0.90
 -12  15   0    0.90    0.70
 -12  15   0    1.00    0.60
  12  15   0    1.40    0.70
  13 -15   0   -0.20    0.90
 -13  15   0    0.40    0.60
  13  15   0   -0.90    0.80
  13  15   0    0.60    0.80
   0 -16   0   26.60    1.10
   0 -16   0   28.70    1.10
   0 -16   0   27.30    1.10
   0 -16   0   27.60    1.30
   0  16   0   26.50    1.10
   0  16   0   28.90    1.20
   0  16   0   26.40    1.10
   0  16   0   27.10    1.10
   1 -16   0    0.90    0.40
  -1 -16   0    1.00    0.40
  -1 -16   0    0.60    0.30
   1 -16   0    1.10    0.30
   1 -16   0    1.50    0.30
  -1 -16   0    1.40    0.30
  -1  16   0    1.20    0.30
   1  16   0    1.20    0.40
   1  16   0    1.20    0.30
   1  16   0    0.90    0.40
  -1  16   0    1.00    0.30
   1  16   0    0.80    0.30
   1  16   0    1.20    0.30
  -1  16   0    0.60    0.30
  -1  16   0    1.50    0.40
   2 -16   0   31.80    1.40
  -2 -16   0   30.60    1.20
  -2 -16   0   30.40    1.20
   2 -16   0   30.50    1.20
  -2 -16   0   29.80    1.40
   2  16   0   32.70    1.20
  -2  16   0   31.60    1.30
   2  16   0   30.10    1.30
  -2  16   0   30.40    1.20
  -2  16   0   32.30    1.20
   2  16   0   31.30    1.20
  -2  16   0   30.10    1.20
   2  16   0   32.80    1.40
   2  16   0   32.40    1.30
   3 -16   0   20.70    1.00
   3 -16   0   19.30    0.80
  -3 -16   0   19.50    1.10
   3 -16   0   18.40    0.90
  -3 -16   0   20.20    0.90
  -3 -16   0   20.50    0.90
   3 -16   0   19.50    1.00
   3  16   0   18.80    1.00
  -3  16   0   20.60    1.00
   3  16   0   21.70    1.00
  -3  16   0   19.80    1.00
   3  16   0   21.60    1.10
   3  16   0   19.70    0.90
  -3  16   0   20.60    0.90
  -3  16   0   15.30    0.80
   4 -16   0    2.90    0.40
   4 -16   0    3.80    0.50
   4 -16   0    3.90    0.30
   4 -16   0    3.30    0.50
  -4 -16   0    3.30    0.50
  -4 -16   0    3.70    0.40
  -4 -16   0    3.70    0.60
   4  16   0    4.50    0.60
  -4  16   0    4.00    0.50
   4  16   0    3.60    0.40
  -4  16   0    3.90    0.50
   4  16   0    3.10    0.50
   4  16   0    2.90    0.50
  -4  16   0    3.90    0.40
   5 -16   0    4.00    0.60
  -5 -16   0    3.10    0.50
   5 -16   0    3.40    0.50
   5 -16   0    4.20    0.50
  -5 -16   0    3.60    0.60
  -5  16   0    3.60    0.40
  -5  16   0    3.70    0.50
   5  16   0    3.80    0.50
   5  16   0    3.00    0.60
   5  16   0    4.60    0.60
  -5  16   0    4.00    0.50
   6 -16   0    3.10    0.50
   6 -16   0    3.70    0.60
  -6 -16   0    2.70    0.50
   6 -16   0    3.60    0.60
  -6 -16   0    3.00    0.60
  -6  16   0    3.50    0.50
  -6  16   0    3.20    0.50
   6  16   0    3.90    0.60
   6  16   0    3.30    0.50
   6  16   0    3.90    0.70
   7 -16   0   94.39    3.30
   7 -16   0   88.49    3.50
  -7 -16   0   92.19    3.50
   7 -16   0   90.69    3.30
  -7 -16   0   90.69    3.20
  -7  16   0   93.59    3.20
   7  16   0   88.89    3.10
  -7  16   0   89.19    3.10
   7  16   0   88.79    3.30
   7  16   0   91.09    3.20
   8 -16   0   18.00    1.20
  -8 -16   0   16.80    1.10
  -8 -16   0   16.40    1.10
   8 -16   0   17.60    1.30
  -8  16   0   15.10    1.00
   8  16   0   14.90    1.10
   8  16   0   16.50    1.20
  -8  16   0   17.60    1.10
   8  16   0   16.60    1.10
   9 -16   0    2.50    0.80
  -9 -16   0    4.10    0.70
   9 -16   0    3.30    0.70
   9  16   0    3.90    0.80
   9  16   0    3.30    0.70
  -9  16   0    3.70    0.70
   9  16   0    2.80    0.80
  -9  16   0    2.70    0.60
 -10 -16   0    6.00    0.80
  10 -16   0    5.60    0.90
  10 -16   0    6.50    0.90
 -10  16   0    5.00    0.80
  10  16   0    4.90    0.90
 -10  16   0    5.10    0.70
  10  16   0    6.40    0.90
  11 -16   0    2.30    0.90
  11 -16   0    2.70    0.80
 -11  16   0    2.90    0.70
  11  16   0    1.70    0.70
  11  16   0    2.50    0.90
 -11  16   0    2.10    0.60
  12 -16   0   -1.20    0.70
  12 -16   0    1.90    0.90
  12  16   0    0.70    0.90
 -12  16   0    0.10    0.60
  12  16   0    0.70    0.70
 -12  16   0    0.10    0.70
  13 -16   0    0.30    0.90
  13  16   0   -0.80    0.70
  13  16   0    1.30    1.00
 -13  16   0    1.00    0.70
   0 -17   0    0.70    0.40
   0 -17   0    0.70    0.30
   0 -17   0    0.30    0.30
   0  17   0    0.30    0.30
   0  17   0   -0.20    0.30
   0  17   0    0.20    0.30
   0  17   0    0.20    0.20
   1 -17   0   81.79    2.70
  -1 -17   0   82.89    2.70
   1 -17   0   83.89    3.10
  -1 -17   0   87.69    3.10
  -1 -17   0   82.89    2.70
  -1  17   0   86.29    2.70
  -1  17   0   80.19    2.80
   1  17   0   85.49    2.70
   1  17   0   80.89    2.80
   1  17   0   77.39    2.80
   1  17   0   80.79    2.70
  -1  17   0   81.49    2.80
  -1  17   0   81.19    2.70
   1  17   0   82.89    3.00
  -2 -17   0    0.60    0.30
  -2 -17   0    2.10    0.40
   2 -17   0    2.40    0.40
   2 -17   0    2.00    0.40
  -2 -17   0    2.10    0.30
  -2  17   0    2.30    0.40
  -2  17   0    2.20    0.30
   2  17   0    2.20    0.30
   2  17   0    2.00    0.40
  -2  17   0    1.20    0.30
   2  17   0    1.60    0.40
   2  17   0    1.60    0.30
   2  17   0    2.60    0.50
  -2  17   0    1.80    0.40
  -3 -17   0   19.90    0.90
   3 -17   0   18.90    0.80
   3 -17   0   20.20    1.00
  -3 -17   0   18.50    0.90
   3 -17   0   20.30    1.10
  -3 -17   0   20.20    1.20
   3 -17   0   20.00    1.00
   3  17   0   19.90    1.10
   3  17   0   19.70    1.10
  -3  17   0   20.90    1.00
  -3  17   0   20.30    0.90
  -3  17   0   18.40    1.00
   3  17   0   20.60    1.00
   3  17   0   19.30    0.90
   3  17   0   21.20    0.90
   4 -17   0    9.10    0.70
  -4 -17   0    9.80    0.80
   4 -17   0    8.70    0.70
   4 -17   0   10.10    0.80
  -4 -17   0    9.90    0.70
  -4  17   0    9.10    0.70
  -4  17   0    8.60    0.70
   4  17   0    8.80    0.70
   4  17   0    9.60    0.80
   4  17   0    7.90    0.70
  -5 -17   0   -0.10    0.50
  -5 -17   0   -0.20    0.40
   5 -17   0    0.40    0.40
   5 -17   0   -0.30    0.40
  -5  17   0    0.00    0.40
   5  17   0    0.00    0.30
   5  17   0    0.20    0.40
  -5  17   0   -0.40    0.30
   5  17   0   -0.10    0.40
  -5  17   0    1.00    0.30
  -6 -17   0   24.70    1.40
   6 -17   0   24.60    1.40
   6 -17   0   23.30    1.20
  -6 -17   0   24.30    1.20
   6 -17   0   23.40    1.20
   6  17   0   21.90    1.20
   6  17   0   22.50    1.20
  -6  17   0   24.60    1.20
  -6  17   0   22.90    1.10
   6  17   0   24.00    1.20
  -7 -17   0   50.69    2.10
   7 -17   0   49.99    2.30
  -7 -17   0   48.80    2.20
   7 -17   0   52.79    2.10
   7 -17   0   50.99    2.10
  -7  17   0   54.29    2.10
   7  17   0   48.80    2.10
  -7  17   0   50.29    1.90
   7  17   0   53.49    2.10
   7  17   0   51.19    2.00
   8 -17   0    4.20    0.80
  -8 -17   0    3.00    0.70
   8 -17   0    3.30    0.60
  -8  17   0    2.60    0.60
  -8  17   0    3.40    0.60
   8  17   0    3.50    0.60
   8  17   0    2.80    0.70
   8  17   0    4.30    0.70
   9 -17   0   -0.30    0.60
   9 -17   0    0.10    0.60
  -9 -17   0   -0.90    0.50
   9  17   0   -0.50    0.60
   9  17   0    0.10    0.70
  -9  17   0    0.40    0.50
   9  17   0    0.70    0.60
  -9  17   0   -0.10    0.60
  10 -17   0    2.60    0.80
 -10 -17   0    4.00    0.80
  10 -17   0    3.00    0.80
  10  17   0    3.90    0.80
 -10  17   0    4.20    0.80
  10  17   0    3.40    0.90
 -10  17   0    3.60    0.60
  11 -17   0   -0.10    0.70
  11 -17   0   -0.30    0.70
  11  17   0    0.70    0.70
  11  17   0   -0.70    0.60
 -11  17   0    0.90    0.70
 -11  17   0    0.50    0.50
  12 -17   0    3.10    0.90
  12 -17   0    6.00    1.10
 -12  17   0    3.40    0.70
  12  17   0    4.90    0.90
  12  17   0    6.10    1.10
 -12  17   0    3.60    0.90
  13 -17   0   -1.00    0.80
  13  17   0   -0.30    0.90
  13  17   0    0.00    0.70
   0 -18   0   27.30    1.20
   0 -18   0   27.90    1.40
   0  18   0   27.50    1.20
   0  18   0   26.40    1.20
   0  18   0   30.60    1.10
   1 -18   0    6.50    0.50
  -1 -18   0    6.90    0.60
  -1 -18   0    8.00    0.60
   1 -18   0    6.40    0.70
   1  18   0    7.60    0.60
   1  18   0    8.50    0.60
   1  18   0    8.20    0.60
  -1  18   0    7.20    0.60
  -1  18   0    7.40    0.60
   1  18   0    6.80    0.60
  -1  18   0    8.00    0.50
   2 -18   0    7.00    0.50
   2 -18   0    6.20    0.70
   2 -18   0    6.40    0.60
  -2 -18   0    7.00    0.60
   2  18   0    5.70    0.60
   2  18   0    6.50    0.70
  -2  18   0    6.00    0.60
  -2  18   0    5.70    0.50
  -2  18   0    7.20    0.50
   2  18   0    5.50    0.50
   2  18   0    6.00    0.50
   3 -18   0   18.40    1.10
  -3 -18   0   18.50    1.10
   3 -18   0   17.70    0.90
  -3 -18   0   19.20    1.00
   3 -18   0   17.60    1.00
   3 -18   0   17.90    0.80
   3  18   0   17.90    1.00
   3  18   0   17.40    1.00
  -3  18   0   18.50    1.00
  -3  18   0   21.10    0.90
  -3  18   0   18.50    1.00
   3  18   0   17.80    0.90
   4 -18   0    2.90    0.50
  -4 -18   0    2.50    0.60
  -4 -18   0    3.00    0.50
   4 -18   0    3.20    0.50
  -4  18   0    3.40    0.50
   4  18   0    3.10    0.50
   4  18   0    2.60    0.50
  -4  18   0    2.40    0.50
   4  18   0    3.00    0.50
  -5 -18   0    1.50    0.40
   5 -18   0    2.40    0.50
   5 -18   0    1.10    0.50
  -5 -18   0    1.80    0.50
  -5  18   0    1.80    0.50
  -5  18   0    1.80    0.40
   5  18   0    1.90    0.60
  -5  18   0    1.80    0.50
   5  18   0    1.50    0.40
   5  18   0    2.10    0.50
   6 -18   0   14.00    1.00
   6 -18   0   13.70    1.00
  -6 -18   0   13.70    1.00
  -6 -18   0   14.30    1.10
   6  18   0   13.50    1.10
  -6  18   0   13.80    1.00
   6  18   0   14.50    1.10
   6  18   0   14.50    0.90
  -6  18   0   14.20    0.90
  -7 -18   0   76.09    3.10
   7 -18   0   77.49    2.90
   7 -18   0   76.29    3.10
   7 -18   0   74.49    2.90
   7  18   0   75.29    2.70
  -7  18   0   73.29    2.80
   7  18   0   78.99    2.90
   7  18   0   76.59    2.90
  -7  18   0   72.29    2.60
   8 -18   0   48.20    2.10
  -8 -18   0   45.90    2.20
   8 -18   0   46.20    2.20
  -8  18   0   44.90    2.00
   8  18   0   49.90    2.10
  -8  18   0   47.20    1.90
   8  18   0   47.30    2.10
   8  18   0   45.80    2.00
   9 -18   0    0.30    0.60
   9 -18   0   -0.70    0.60
  -9 -18   0    0.10    0.60
   9  18   0    0.40    0.60
   9  18   0    0.40    0.60
   9  18   0   -1.00    0.60
  -9  18   0    0.30    0.50
  -9  18   0    0.30    0.60
  10 -18   0    1.50    0.70
  10 -18   0    1.00    0.70
 -10 -18   0    0.90    0.60
 -10  18   0    0.40    0.50
  10  18   0    1.60    0.80
  10  18   0    1.40    0.70
 -10  18   0    1.30    0.70
  11 -18   0    2.90    0.90
  11 -18   0    4.40    1.00
 -11  18   0    3.70    0.80
  11  18   0    4.50    0.80
 -11  18   0    4.20    0.70
  11  18   0    4.90    1.00
  12 -18   0    0.20    0.80
  12 -18   0    0.20    0.80
 -12  18   0    2.20    0.60
  12  18   0    0.70    0.70
 -12  18   0    0.20    0.70
  12  18   0    0.70    0.90
   0 -19   0    0.50    0.40
   0 -19   0    0.20    0.30
   0  19   0    0.00    0.20
   0  19   0    0.10    0.40
   0  19   0   -0.10    0.20
   0  19   0   -0.20    0.30
  -1 -19   0   23.30    1.10
   1 -19   0   22.30    1.20
   1 -19   0   22.20    1.00
  -1  19   0   21.80    1.00
   1  19   0   25.70    1.10
  -1  19   0   22.30    1.00
   1  19   0   23.10    1.10
  -1  19   0   22.20    1.10
   1  19   0   22.50    1.10
   2 -19   0   89.69    2.90
  -2 -19   0   85.89    2.90
   2 -19   0   85.79    2.90
   2 -19   0   84.29    3.20
  -2  19   0   84.79    2.90
  -2  19   0   87.19    3.00
   2  19   0   84.69    3.00
   2  19   0   87.29    3.00
   2  19   0   83.89    2.80
   3 -19   0   16.30    1.00
   3 -19   0   14.70    0.70
   3 -19   0   16.10    1.00
  -3 -19   0   16.60    0.90
  -3 -19   0   13.80    1.00
  -3  19   0   15.90    0.90
  -3  19   0   16.80    1.00
   3  19   0   16.30    1.00
   3  19   0   14.80    1.00
   3  19   0   15.00    0.80
   4 -19   0   59.19    2.30
   4 -19   0   53.79    2.10
  -4 -19   0   55.59    2.10
  -4 -19   0   56.49    2.40
   4  19   0   53.79    2.00
  -4  19   0   53.79    2.00
   4  19   0   57.99    2.10
  -4  19   0   58.59    2.20
   4  19   0   55.49    2.20
  -4  19   0   54.49    2.10
   5 -19   0   10.30    0.80
   5 -19   0   11.30    0.90
  -5 -19   0   10.40    1.00
  -5  19   0   10.10    0.90
   5  19   0   11.80    0.90
  -5  19   0    9.30    0.70
  -5  19   0   10.40    0.80
   5  19   0    9.50    0.70
   5  19   0   10.10    0.90
   6 -19   0  106.19    3.90
   6 -19   0  103.69    3.70
  -6 -19   0  108.79    4.00
   6  19   0  110.19    3.70
  -6  19   0  100.49    3.40
   6  19   0  103.79    3.50
   6  19   0  102.19    3.70
  -6  19   0  105.89    3.70
   7 -19   0   52.69    2.20
   7 -19   0   50.89    2.30
  -7 -19   0   50.39    2.30
   7 -19   0   52.89    2.20
   7  19   0   53.59    2.10
  -7  19   0   47.50    1.90
  -7  19   0   51.29    2.10
   7  19   0   49.00    2.00
   7  19   0   51.09    2.20
   8 -19   0   22.30    1.40
  -8 -19   0   23.30    1.50
   8 -19   0   23.40    1.60
  -8  19   0   23.60    1.20
  -8  19   0   25.40    1.40
   8  19   0   25.00    1.40
   8  19   0   27.40    1.40
   8  19   0   24.70    1.50
  -9 -19   0    7.00    0.90
   9 -19   0    6.70    0.90
   9 -19   0    7.00    1.00
  -9  19   0    6.90    0.70
   9  19   0    4.80    0.80
  -9  19   0    6.50    0.80
   9  19   0    5.60    0.80
   9  19   0    7.00    0.80
  10 -19   0    3.40    0.90
 -10 -19   0    2.80    0.70
  10 -19   0    3.50    0.90
 -10  19   0    3.50    0.80
  10  19   0    3.80    0.80
  10  19   0    2.50    0.90
 -10  19   0    1.90    0.60
  11 -19   0    0.40    0.80
  11 -19   0    0.10    0.70
 -11  19   0    1.40    0.70
  11  19   0    0.40    0.70
  11  19   0    1.40    0.90
 -11  19   0    1.10    0.60
  12 -19   0    0.60    0.90
  12 -19   0   -0.30    0.80
  12  19   0   -0.60    0.70
  12  19   0   -0.60    0.90
 -12  19   0   -0.10    0.60
 -12  19   0   -0.30    0.80
   0 -20   0   44.10    1.70
   0 -20   0   44.90    2.00
   0  20   0   44.40    1.70
   0  20   0   42.10    1.70
   1 -20   0   39.60    1.80
  -1 -20   0   40.50    1.60
  -1  20   0   40.00    1.70
  -1  20   0   41.30    1.60
   1  20   0   40.70    1.70
   1  20   0   41.50    1.60
  -2 -20   0   17.10    0.90
   2 -20   0   15.20    1.00
   2 -20   0   17.10    0.80
  -2  20   0   17.30    0.90
   2  20   0   15.20    0.90
   2  20   0   14.50    0.90
   2  20   0   16.50    1.00
  -2  20   0   14.30    1.00
   3 -20   0   10.30    0.80
  -3 -20   0   13.70    1.00
   3 -20   0   11.90    0.90
  -3  20   0   12.90    0.90
  -3  20   0   10.90    0.80
  -3  20   0    8.20    0.60
   3  20   0   11.60    0.90
   3  20   0   11.80    0.80
   3  20   0   11.90    0.80
  -4 -20   0    4.20    0.70
   4 -20   0    3.80    0.60
   4 -20   0    3.90    0.60
   4  20   0    4.00    0.70
  -4  20   0    4.20    0.60
   4  20   0    3.70    0.60
   4  20   0    3.80    0.50
  -4  20   0    4.20    0.50
  -4  20   0    4.70    0.60
   5 -20   0    4.00    0.70
  -5 -20   0    4.30    0.70
   5 -20   0    4.50    0.60
   5  20   0    2.80    0.50
   5  20   0    4.40    0.70
  -5  20   0    5.20    0.70
  -5  20   0    3.50    0.50
  -5  20   0    5.40    0.70
   5  20   0    3.50    0.70
  -6 -20   0   47.50    2.20
   6 -20   0   44.60    2.00
   6 -20   0   45.10    2.00
   6  20   0   48.70    2.00
   6  20   0   45.10    1.90
  -6  20   0   47.60    2.00
   6  20   0   45.60    2.00
  -6  20   0   47.80    1.80
   7 -20   0    3.50    0.70
   7 -20   0    3.30    0.70
  -7 -20   0    4.40    0.80
   7 -20   0    5.10    0.70
   7  20   0    5.70    0.80
  -7  20   0    5.10    0.70
   7  20   0    4.30    0.60
  -7  20   0    5.40    0.60
   7  20   0    4.10    0.80
   8 -20   0    1.30    0.70
  -8 -20   0    0.90    0.60
   8 -20   0    1.30    0.70
  -8  20   0    1.80    0.50
   8  20   0    0.80    0.60
   8  20   0    1.40    0.70
   8  20   0    1.70    0.70
  -8  20   0    0.10    0.60
   9 -20   0    0.20    0.60
   9 -20   0    0.30    0.70
  -9 -20   0    0.80    0.60
   9  20   0    0.80    0.60
   9  20   0   -0.20    0.60
  -9  20   0   -0.30    0.40
  -9  20   0   -0.40    0.50
   9  20   0    0.80    0.70
 -10 -20   0    6.40    0.90
  10 -20   0    7.20    1.00
  10 -20   0    6.40    1.00
 -10  20   0    6.40    0.70
  10  20   0    7.70    0.90
 -10  20   0    6.50    0.90
  10  20   0    5.10    1.00
  11 -20   0   11.10    1.30
  11 -20   0    7.30    1.10
  11  20   0    7.80    1.20
 -11  20   0    8.30    1.00
  11  20   0    7.10    1.00
 -11  20   0    8.90    0.90
  12 -20   0   -0.80    0.80
  12 -20   0   -0.10    0.90
  12  20   0    0.90    1.00
 -12  20   0   -0.40    0.50
  12  20   0    0.90    0.70
   0 -21   0    0.60    0.40
   0  21   0    0.40    0.30
   0  21   0    0.00    0.50
   0  21   0    0.40    0.40
   1 -21   0   12.10    1.00
  -1 -21   0   11.50    0.90
   1  21   0   10.70    0.80
   1  21   0   10.60    0.90
  -1  21   0   11.50    0.90
  -1  21   0   12.80    0.90
   1  21   0   11.50    0.70
   2 -21   0   43.30    1.90
  -2 -21   0   38.00    1.80
   2 -21   0   42.60    1.60
  -2  21   0   38.30    1.50
  -2  21   0   39.60    1.70
   2  21   0   43.50    1.70
   2  21   0   40.80    1.50
   2  21   0   39.70    1.70
  -2  21   0   37.30    1.60
   3 -21   0   20.30    1.20
  -3 -21   0   21.70    1.30
   3 -21   0   19.00    1.10
  -3  21   0   19.70    0.90
   3  21   0   20.60    1.10
   3  21   0   19.10    1.00
  -3  21   0   21.00    1.10
  -3  21   0   20.30    1.20
   3  21   0   18.10    1.10
  -4 -21   0    7.30    0.90
   4 -21   0    6.50    0.80
   4 -21   0    7.20    0.80
   4  21   0    6.10    0.60
   4  21   0    6.20    0.70
   4  21   0    6.20    0.80
  -4  21   0    6.30    0.60
  -4  21   0    6.40    0.80
  -4  21   0    6.50    0.70
  -5 -21   0   -0.30    0.60
   5 -21   0    0.50    0.60
   5 -21   0    1.60    0.50
  -5  21   0    0.90    0.40
  -5  21   0    0.80    0.50
   5  21   0    1.00    0.60
   5  21   0    0.30    0.40
   5  21   0    0.00    0.50
  -5  21   0    0.80    0.50
  -6 -21   0    2.60    0.70
   6 -21   0    2.10    0.70
   6 -21   0    1.90    0.60
   6  21   0    1.80    0.60
  -6  21   0    2.10    0.60
   6  21   0    2.40    0.50
   6  21   0    2.90    0.70
  -6  21   0    1.80    0.40
  -6  21   0    1.90    0.60
   7 -21   0    2.90    0.70
  -7 -21   0    3.50    0.80
   7 -21   0    3.00    0.70
   7 -21   0    2.70    0.70
  -7  21   0    2.50    0.50
  -7  21   0    3.20    0.60
   7  21   0    2.70    0.70
   7  21   0    3.00    0.60
   7  21   0    2.50    0.80
  -8 -21   0   12.50    1.10
   8 -21   0   13.80    1.20
   8 -21   0   10.50    1.10
  -8  21   0   11.40    0.90
   8  21   0   11.30    0.90
   8  21   0   11.00    1.10
   8  21   0   10.20    1.10
  -8  21   0   10.00    1.00
   9 -21   0    1.20    0.70
   9 -21   0    0.80    0.80
  -9 -21   0    1.70    0.70
   9  21   0    3.20    0.80
   9  21   0    2.70    0.80
  -9  21   0    2.70    0.70
  -9  21   0    1.00    0.50
   9  21   0    2.10    0.70
  10 -21   0    0.50    0.70
 -10 -21   0    0.20    0.70
  10 -21   0    0.40    0.70
 -10  21   0   -0.10    0.60
  10  21   0    0.80    0.80
  10  21   0    0.70    0.70
 -10  21   0    0.30    0.50
  11 -21   0    0.60    0.80
  11 -21   0    0.90    0.80
 -11  21   0    0.20    0.50
  11  21   0   -0.20    0.80
  11  21   0    0.00    0.70
 -11  21   0    0.10    0.70
  12 -21   0    0.80    0.90
  12 -21   0   -0.10    0.90
  12  21   0   -0.20    0.70
  12  21   0   -0.20    1.00
   0 -22   0    6.20    0.80
   0  22   0    6.70    0.80
   0  22   0    6.90    0.60
   0  22   0    6.40    0.70
   1 -22   0    8.00    0.90
  -1 -22   0    9.90    0.90
  -1  22   0    8.40    0.60
   1  22   0    8.20    0.70
   1  22   0   10.20    0.90
  -1  22   0    9.50    0.80
  -1  22   0    7.90    0.70
   1  22   0    9.80    0.70
   2 -22   0   71.99    2.60
  -2 -22   0   69.79    2.90
   2 -22   0   78.29    3.00
  -2  22   0   71.79    2.70
   2  22   0   71.59    2.70
  -2  22   0   72.99    2.60
   2  22   0   76.29    2.70
  -2  22   0   73.89    2.50
   2  22   0   69.99    2.50
  -3 -22   0   57.69    2.50
   3 -22   0   58.29    2.40
   3 -22   0   61.29    2.50
  -3  22   0   61.49    2.30
  -3  22   0   60.89    2.10
  -3  22   0   62.39    2.40
   3  22   0   60.69    2.20
   3  22   0   62.99    2.30
   3  22   0   60.39    2.40
  -4 -22   0   -0.60    0.50
   4 -22   0    0.10    0.50
   4 -22   0   -0.80    0.50
  -4  22   0   -0.60    0.30
   4  22   0    0.50    0.40
  -4  22   0    0.30    0.50
  -4  22   0   -0.70    0.50
   4  22   0   -0.80    0.50
   4  22   0    0.00    0.60
  -5 -22   0    0.40    0.60
   5 -22   0    0.20    0.50
   5 -22   0    0.20    0.60
   5  22   0    0.20    0.60
   5  22   0    0.50    0.50
  -5  22   0    0.00    0.50
   5  22   0    0.00    0.50
  -5  22   0    0.50    0.50
  -5  22   0   -0.10    0.40
   6 -22   0    5.60    0.80
  -6 -22   0    6.30    0.90
   6 -22   0    5.60    0.70
   6  22   0    6.50    0.80
   6  22   0    6.20    0.70
  -6  22   0    6.50    0.60
  -6  22   0    6.60    0.80
  -6  22   0    5.90    0.80
   6  22   0    6.00    0.80
   7 -22   0    7.60    0.90
   7 -22   0    8.60    1.00
   7 -22   0    6.50    0.80
  -7 -22   0    8.10    1.00
   7  22   0    6.90    0.80
   7  22   0    7.50    1.00
  -7  22   0    7.50    0.80
   7  22   0    7.30    0.90
  -7  22   0    7.40    0.70
   8 -22   0   34.70    1.80
   8 -22   0   28.70    1.70
  -8 -22   0   28.80    1.70
  -8  22   0   30.20    1.60
   8  22   0   27.30    1.50
  -8  22   0   30.40    1.40
   8  22   0   32.60    1.80
   8  22   0   30.80    1.70
  -9 -22   0    2.00    0.70
   9 -22   0    3.60    0.90
   9 -22   0    1.20    0.70
   9  22   0    1.50    0.70
   9  22   0    2.20    0.80
  -9  22   0    2.50    0.80
  -9  22   0    3.70    0.60
  10 -22   0    4.30    1.00
  10 -22   0    3.50    0.90
 -10 -22   0    4.80    0.90
 -10  22   0    3.80    0.60
 -10  22   0    3.30    0.80
  10  22   0    3.40    1.00
  10  22   0    2.30    0.70
  11 -22   0    1.30    0.90
  11 -22   0    0.40    0.80
  11  22   0    0.40    0.90
  11  22   0    1.40    0.80
 -11  22   0    2.10    0.60
 -11  22   0    2.00    0.80
   0 -23   0    0.00    0.50
   0  23   0    0.00    0.40
   0  23   0   -0.30    0.30
   0  23   0   -0.30    0.50
  -1 -23   0    5.60    0.80
   1 -23   0    6.30    0.80
   1  23   0    5.10    0.70
   1  23   0    6.30    0.60
  -1  23   0    6.20    0.70
  -1  23   0    6.60    0.60
   1  23   0    5.90    0.70
  -1  23   0    6.70    0.80
  -2 -23   0    4.10    0.70
   2 -23   0    4.60    0.50
   2 -23   0    5.30    0.80
   2  23   0    5.40    0.70
   2  23   0    5.50    0.80
  -2  23   0    4.90    0.50
  -2  23   0    5.00    0.70
  -2  23   0    4.20    0.60
   2  23   0    5.20    0.60
   3 -23   0   45.70    2.00
  -3 -23   0   43.10    2.10
   3 -23   0   46.80    2.10
   3  23   0   44.00    1.80
   3  23   0   46.90    1.90
  -3  23   0   45.50    1.90
  -3  23   0   45.20    1.70
  -3  23   0   47.60    2.00
   3  23   0   44.40    2.00
   4 -23   0    4.30    0.70
  -4 -23   0    4.70    0.80
   4 -23   0    4.40    0.70
  -4  23   0    5.90    0.80
   4  23   0    4.10    0.80
  -4  23   0    4.10    0.50
   4  23   0    5.00    0.70
   4  23   0    4.80    0.60
  -4  23   0    5.50    0.70
  -5 -23   0    9.00    1.00
   5 -23   0    8.10    0.90
   5 -23   0    8.40    0.90
   5  23   0    7.10    0.80
  -5  23   0    9.80    0.90
  -5  23   0    8.30    0.70
   5  23   0   10.80    1.00
  -5  23   0    8.60    0.90
   5  23   0    7.60    0.80
   6 -23   0    1.30    0.60
   6 -23   0    1.80    0.70
  -6 -23   0    1.70    0.70
  -6  23   0    1.10    0.60
   6  23   0    1.20    0.50
   6  23   0    1.30    0.60
  -6  23   0    0.80    0.60
  -6  23   0    1.60    0.40
   6  23   0    0.60    0.70
   7 -23   0    1.50    0.70
   7 -23   0    2.50    0.60
   7 -23   0    0.70    0.60
  -7 -23   0    1.60    0.60
  -7  23   0    1.60    0.60
  -7  23   0    0.80    0.40
   7  23   0    1.30    0.70
   7  23   0    1.90    0.80
   7  23   0    0.90    0.60
   8 -23   0    2.80    0.80
  -8 -23   0    3.60    0.80
   8 -23   0    3.20    0.80
   8  23   0    3.40    0.90
   8  23   0    3.10    0.80
   8  23   0    2.30    0.70
  -8  23   0    3.90    0.80
  -8  23   0    3.90    0.60
   9 -23   0    2.90    0.90
   9 -23   0    3.60    0.90
  -9 -23   0    2.00    0.80
   9  23   0    2.40    0.70
  -9  23   0    1.60    0.50
  -9  23   0    0.50    0.70
   9  23   0    3.60    0.90
 -10 -23   0    2.00    0.80
  10 -23   0    1.20    0.80
  10 -23   0    1.20    0.80
  10  23   0    2.50    1.00
  10  23   0    1.70    0.70
 -10  23   0    1.80    0.60
 -10  23   0    2.90    0.80
  11 -23   0    1.30    0.90
  11 -23   0    0.30    0.90
 -11  23   0    0.90    0.60
  11  23   0   -0.50    0.80
 -11  23   0   -0.10    0.80
  11  23   0   -0.30    0.70
   0 -24   0   60.89    2.60
   0  24   0   63.29    2.40
   0  24   0   57.29    2.30
   0  24   0   59.99    2.10
   1 -24   0    4.10    0.80
  -1 -24   0    3.30    0.70
  -1  24   0    3.30    0.60
   1  24   0    3.50    0.70
   1  24   0    4.20    0.50
  -1  24   0    3.90    0.50
  -1  24   0    4.40    0.70
   1  24   0    4.80    0.70
   2 -24   0    8.50    0.90
  -2 -24   0    8.50    0.90
   2  24   0    7.60    0.70
  -2  24   0    7.80    0.60
   2  24   0    6.70    0.80
  -2  24   0    9.30    0.90
   2  24   0    6.90    0.80
  -2  24   0    7.40    0.80
   3 -24   0   51.59    2.20
   3 -24   0   54.49    2.30
  -3 -24   0   48.40    2.40
   3  24   0   55.09    2.00
   3  24   0   53.69    2.20
  -3  24   0   53.99    2.00
  -3  24   0   56.19    2.20
  -3  24   0   55.09    2.20
   3  24   0   54.29    2.30
  -4 -24   0   -0.10    0.50
   4 -24   0    0.20    0.50
   4 -24   0   -0.50    0.50
   4  24   0    1.00    0.60
  -4  24   0   -0.60    0.50
  -4  24   0   -0.30    0.60
  -4  24   0   -0.10    0.40
   4  24   0    0.10    0.50
   4  24   0   -0.10    0.40
   5 -24   0   -0.20    0.60
  -5 -24   0    0.00    0.50
   5 -24   0   -0.40    0.50
  -5  24   0    0.20    0.40
   5  24   0   -0.60    0.50
   5  24   0   -0.90    0.50
   5  24   0    0.70    0.60
  -5  24   0    0.30    0.50
  -5  24   0    0.10    0.60
   6 -24   0    1.60    0.70
   6 -24   0    2.40    0.70
  -6 -24   0    3.40    0.80
  -6  24   0    3.00    0.70
  -6  24   0    2.70    0.70
   6  24   0    3.00    0.60
  -6  24   0    2.60    0.50
   6  24   0    3.70    0.80
   6  24   0    3.00    0.70
   7 -24   0   -0.40    0.70
   7 -24   0    1.00    0.70
  -7 -24   0    0.70    0.70
   7  24   0   -0.30    0.50
   7  24   0    1.50    0.70
   7  24   0    1.50    0.70
  -7  24   0    0.90    0.40
  -7  24   0   -0.10    0.60
   8 -24   0   14.20    1.20
  -8 -24   0   12.70    1.20
   8 -24   0   13.40    1.30
  -8  24   0   12.20    0.90
   8  24   0   12.00    1.20
  -8  24   0   13.30    1.10
   8  24   0   14.80    1.20
   8  24   0   10.60    1.00
   9 -24   0    0.10    0.70
  -9 -24   0   -0.40    0.70
   9 -24   0    0.90    0.70
  -9  24   0   -0.20    0.50
   9  24   0    0.70    0.80
  -9  24   0    0.80    0.70
   9  24   0    0.10    0.60
  10 -24   0    1.50    0.90
  10 -24   0    0.30    0.80
 -10 -24   0    0.90    0.70
 -10  24   0    1.40    0.80
 -10  24   0    1.10    0.60
  10  24   0   -0.50    0.80
  10  24   0    0.70    0.70
  11 -24   0    1.60    0.90
  11 -24   0    2.80    1.00
  11  24   0    1.60    1.00
 -11  24   0    3.50    0.70
  11  24   0    2.40    0.80
 -11  24   0    3.10    0.90
   0 -25   0    0.40    0.60
   0  25   0    1.40    0.60
   0  25   0    0.90    0.60
   0  25   0    0.10    0.40
   1 -25   0   32.00    1.70
  -1 -25   0   28.20    1.60
  -1  25   0   32.70    1.30
  -1  25   0   30.30    1.60
   1  25   0   28.80    1.60
  -1  25   0   32.80    1.50
   1  25   0   32.50    1.30
   1  25   0   33.20    1.50
  -2 -25   0   12.30    1.10
   2 -25   0   13.90    1.20
   2 -25   0   12.50    1.10
  -2  25   0   13.70    1.00
   2  25   0   11.70    1.00
  -2  25   0   12.30    0.80
  -2  25   0   13.20    1.10
   2  25   0   12.10    0.90
   2  25   0   11.10    0.90
  -3 -25   0   73.79    3.20
   3 -25   0   76.79    3.00
   3 -25   0   76.49    3.20
  -3  25   0   81.09    2.90
   3  25   0   80.99    2.70
   3  25   0   79.39    3.00
   3  25   0   78.09    2.90
  -3  25   0   77.09    2.70
  -3  25   0   79.59    3.00
   4 -25   0    8.80    0.90
   4 -25   0    8.10    0.90
  -4 -25   0    9.00    1.00
   4  25   0    8.80    0.90
   4  25   0    7.40    0.70
  -4  25   0    9.40    0.90
   4  25   0    8.30    0.90
  -4  25   0    9.70    0.70
  -4  25   0   10.10    1.00
   5 -25   0    2.60    0.70
   5 -25   0    3.20    0.70
  -5 -25   0    2.60    0.70
   5  25   0    2.50    0.60
  -5  25   0    3.30    0.50
  -5  25   0    2.30    0.70
  -5  25   0    3.50    0.70
   5  25   0    3.40    0.70
   5  25   0    2.60    0.70
   6 -25   0    0.80    0.70
   6 -25   0    1.00    0.60
  -6 -25   0    1.30    0.60
   6  25   0    1.70    0.70
  -6  25   0    1.20    0.40
   6  25   0    0.10    0.70
  -6  25   0    0.90    0.60
   6  25   0    1.30    0.60
  -6  25   0    1.20    0.70
  -7 -25   0    0.00    0.70
   7 -25   0    0.00    0.60
   7 -25   0    0.40    0.70
   7  25   0    0.30    0.70
  -7  25   0    0.50    0.60
   7  25   0    0.50    0.50
  -7  25   0   -0.10    0.40
   7  25   0    0.40    0.60
  -8 -25   0   -0.80    0.60
   8 -25   0   -0.20    0.70
   8 -25   0   -0.50    0.70
  -8  25   0    0.60    0.50
   8  25   0   -0.40    0.70
  -8  25   0    1.90    0.70
   8  25   0   -0.10    0.60
   8  25   0   -0.80    0.70
   9 -25   0    1.70    0.80
  -9 -25   0    1.90    0.80
   9 -25   0    1.70    0.80
   9  25   0    2.20    0.70
  -9  25   0    2.60    0.80
   9  25   0    1.60    0.90
  -9  25   0    1.80    0.60
  10 -25   0   -0.60    0.80
  10 -25   0    2.10    0.90
 -10 -25   0    1.90    0.80
  10  25   0    0.30    0.90
  10  25   0    0.20    0.70
 -10  25   0    0.40    0.60
 -10  25   0    0.80    0.80
   0 -26   0   -0.10    0.50
   0  26   0    0.10    0.50
   0  26   0   -0.10    0.60
   0  26   0    0.00    0.40
   1 -26   0   19.20    1.30
  -1 -26   0   18.60    1.30
   1  26   0   19.60    1.30
   1  26   0   20.70    1.20
   1  26   0   19.80    1.00
  -1  26   0   21.00    1.20
  -1  26   0   20.50    1.30
  -1  26   0   19.50    1.00
   2 -26   0   18.50    1.30
  -2 -26   0   16.30    1.30
   2 -26   0   15.30    1.20
  -2  26   0   16.30    0.90
  -2  26   0   17.60    1.30
   2  26   0   15.90    1.20
   2  26   0   17.70    1.00
  -2  26   0   18.10    1.20
   2  26   0   15.30    1.20
  -3 -26   0   16.50    1.20
   3 -26   0   17.10    1.20
   3 -26   0   15.50    1.20
  -3  26   0   18.40    1.20
  -3  26   0   14.80    1.20
   3  26   0   16.50    1.20
   3  26   0   14.70    1.20
  -3  26   0   15.90    0.90
   3  26   0   14.90    1.00
   4 -26   0    3.60    0.70
   4 -26   0    2.40    0.70
  -4 -26   0    4.40    0.80
   4  26   0    1.70    0.50
   4  26   0    3.30    0.70
   4  26   0    3.10    0.80
  -4  26   0    4.00    0.70
  -4  26   0    2.90    0.50
  -4  26   0    3.60    0.70
  -5 -26   0    3.50    0.80
   5 -26   0    1.70    0.70
   5 -26   0    2.80    0.70
  -5  26   0    2.40    0.70
  -5  26   0    2.90    0.50
   5  26   0    2.90    0.80
   5  26   0    2.90    0.60
   5  26   0    3.10    0.70
  -5  26   0    3.60    0.80
   6 -26   0    0.40    0.60
  -6 -26   0   -0.10    0.60
   6 -26   0    0.00    0.60
  -6  26   0    0.90    0.60
   6  26   0    0.40    0.70
   6  26   0    0.60    0.50
   6  26   0    0.20    0.70
  -6  26   0   -0.20    0.60
  -6  26   0   -0.30    0.40
  -7 -26   0   14.20    1.30
   7 -26   0   12.10    1.20
   7 -26   0   14.00    1.20
   7  26   0   14.30    1.10
  -7  26   0   13.40    0.90
  -7  26   0   14.70    1.20
   7  26   0   12.60    1.20
   7  26   0   13.40    1.30
   8 -26   0   -0.50    0.70
   8 -26   0   -0.10    0.70
  -8 -26   0   -0.60    0.70
  -8  26   0    0.30    0.50
  -8  26   0   -0.80    0.70
   8  26   0   -0.10    0.80
   8  26   0   -0.90    0.70
   8  26   0   -0.40    0.60
   9 -26   0    0.60    0.80
   9 -26   0    0.10    0.80
  -9 -26   0   -0.30    0.70
  -9  26   0   -0.90    0.70
  -9  26   0    0.40    0.50
   9  26   0    0.20    0.80
   9  26   0   -0.10    0.60
  10 -26   0   -0.50    0.80
  10 -26   0   -0.90    0.80
 -10 -26   0    0.60    0.80
 -10  26   0   -0.50    0.70
 -10  26   0    0.20    0.60
  10  26   0   -0.20    0.70
  10  26   0   -0.40    0.80
   0 -27   0    0.50    0.70
   0  27   0   -0.40    0.50
   0  27   0    0.00    0.60
   0  27   0    0.80    0.40
  -1 -27   0   11.60    1.20
   1 -27   0    9.20    1.10
   1  27   0   11.30    0.80
   1  27   0   12.30    1.10
  -1  27   0   10.10    0.80
  -1  27   0   11.30    1.00
   1  27   0   10.40    0.90
  -1  27   0    9.30    1.00
  -2 -27   0    4.80    0.90
   2 -27   0    4.20    0.70
   2 -27   0    4.60    0.80
   2  27   0    5.50    0.80
   2  27   0    6.10    0.80
  -2  27   0    4.60    0.70
  -2  27   0    5.80    0.80
   2  27   0    5.90    0.60
  -2  27   0    4.80    0.60
   3 -27   0   20.50    1.40
  -3 -27   0   17.90    1.30
   3 -27   0   17.20    1.30
   3  27   0   17.70    1.30
  -3  27   0   18.70    1.20
  -3  27   0   18.90    1.00
   3  27   0   19.90    1.10
  -3  27   0   19.60    1.30
   3  27   0   21.10    1.30
   4 -27   0   10.90    1.10
  -4 -27   0   12.20    1.20
   4 -27   0   10.60    1.10
  -4  27   0   11.10    0.80
   4  27   0   11.00    0.90
   4  27   0   11.70    1.10
   4  27   0   11.00    1.00
  -4  27   0   13.60    1.10
  -4  27   0   11.90    1.10
   5 -27   0    0.50    0.60
  -5 -27   0   -0.10    0.70
   5 -27   0    0.80    0.60
   5  27   0    0.50    0.70
   5  27   0    1.60    0.70
  -5  27   0    2.20    0.70
   5  27   0    1.00    0.50
  -5  27   0   -0.20    0.40
  -5  27   0    1.10    0.60
  -6 -27   0    4.00    0.80
   6 -27   0    3.70    0.80
   6 -27   0    3.10    0.80
   6  27   0    4.20    0.80
  -6  27   0    3.40    0.70
  -6  27   0    3.00    0.80
  -6  27   0    4.20    0.60
   6  27   0    3.10    0.60
   6  27   0    3.80    0.90
   7 -27   0    0.70    0.70
  -7 -27   0   -0.90    0.70
  -7  27   0    0.10    0.60
   7  27   0    0.50    0.70
   7  27   0    0.20    0.70
  -7  27   0   -0.10    0.40
   7  27   0    0.70    0.60
  -8 -27   0    0.80    0.80
   8 -27   0   -0.30    0.70
   8 -27   0   -0.40    0.70
   8  27   0   -1.30    0.70
  -8  27   0   -0.30    0.50
  -8  27   0   -0.40    0.70
   8  27   0    0.40    0.60
   8  27   0    0.30    0.80
   9 -27   0   -0.70    0.80
  -9 -27   0   -0.30    0.80
   9 -27   0    1.40    0.90
  -9  27   0    0.70    0.60
  -9  27   0   -0.80    0.70
   9  27   0   -0.40    0.60
   9  27   0    0.50    0.80
   0 -28   0    1.40    0.70
   0  28   0    1.90    0.60
   0  28   0    1.40    0.70
   0  28   0    1.50    0.50
   1 -28   0    0.60    0.70
  -1 -28   0   -0.30    0.70
  -1  28   0   -0.20    0.50
   1  28   0    0.00    0.60
   1  28   0   -0.90    0.50
   1  28   0   -0.20    0.40
  -1  28   0   -0.40    0.60
  -1  28   0    0.00    0.40
  -2 -28   0    0.20    0.60
   2 -28   0    0.30    0.70
   2 -28   0   -0.40    0.60
   2  28   0   -0.10    0.40
  -2  28   0   -0.20    0.40
   2  28   0    0.30    0.60
   2  28   0   -0.30    0.60
  -2  28   0   -0.60    0.60
  -2  28   0   -0.20    0.60
   3 -28   0    1.60    0.70
   3 -28   0    1.90    0.70
  -3 -28   0    0.80    0.60
  -3  28   0    1.00    0.40
   3  28   0    2.40    0.80
   3  28   0    2.20    0.50
  -3  28   0    1.60    0.70
  -3  28   0    2.00    0.70
   3  28   0    1.50    0.70
   4 -28   0    9.00    1.00
  -4 -28   0   10.30    1.20
   4 -28   0    8.80    1.00
  -4  28   0    8.40    0.90
  -4  28   0    8.70    1.00
   4  28   0    8.70    1.00
   4  28   0    8.80    0.80
   4  28   0    7.50    0.90
  -4  28   0   10.50    0.80
   5 -28   0    2.20    0.70
  -5 -28   0    1.20    0.80
   5 -28   0    1.60    0.70
   5  28   0    2.50    0.80
   5  28   0    1.50    0.70
   5  28   0    0.60    0.50
  -5  28   0    2.70    0.80
  -5  28   0    1.60    0.50
  -5  28   0    2.30    0.70
   6 -28   0   -0.60    0.60
  -6 -28   0    0.30    0.80
   6 -28   0    0.30    0.70
   6  28   0    0.30    0.50
  -6  28   0    0.50    0.70
   6  28   0    0.70    0.80
  -6  28   0   -0.30    0.40
   6  28   0   -1.00    0.70
  -6  28   0    0.20    0.70
   7 -28   0    1.60    0.80
  -7 -28   0    2.60    0.90
  -7  28   0    1.70    0.50
   7  28   0    3.00    0.90
   7  28   0    0.60    0.60
   7  28   0    1.40    0.80
  -7  28   0    1.40    0.70
   8 -28   0   -0.70    0.70
  -8 -28   0   -0.30    0.80
   8 -28   0    0.30    0.80
   8  28   0   -0.40    0.80
  -8  28   0   -1.10    0.70
   8  28   0    0.60    0.60
  -8  28   0    0.30    0.50
   9 -28   0    2.20    1.00
  -9 -28   0   -0.10    0.80
   9 -28   0    0.70    0.90
  -9  28   0   -0.70    0.70
  -9  28   0    1.50    0.60
   9  28   0    1.90    1.00
   9  28   0    1.30    0.70
   0 -29   0    0.30    0.70
   0  29   0    0.20    0.40
   0  29   0   -0.10    0.60
   0  29   0    0.80    0.70
   1 -29   0    4.50    0.90
  -1 -29   0    2.90    0.70
   1  29   0    3.80    0.80
  -1  29   0    3.60    0.80
   1  29   0    3.50    0.50
  -1  29   0    4.60    0.60
  -1  29   0    3.10    0.70
   1  29   0    4.50    0.80
  -2 -29   0   15.10    1.30
   2 -29   0   17.90    1.40
   2 -29   0   15.50    1.20
  -2  29   0   17.70    1.00
   2  29   0   15.80    1.30
   2  29   0   16.70    1.00
  -2  29   0   18.00    1.30
  -2  29   0   16.20    1.20
   2  29   0   17.90    1.30
   3 -29   0    1.80    0.70
  -3 -29   0    1.80    0.70
   3 -29   0    1.40    0.80
  -3  29   0    1.80    0.50
   3  29   0    1.10    0.70
   3  29   0    1.10    0.70
   3  29   0    2.10    0.50
  -3  29   0    1.80    0.70
  -3  29   0    1.80    0.70
  -4 -29   0    3.00    0.90
   4 -29   0    2.10    0.70
   4 -29   0    1.80    0.70
  -4  29   0    1.00    0.70
   4  29   0    2.20    0.50
  -4  29   0    3.20    0.80
   4  29   0    1.80    0.70
   4  29   0    2.00    0.80
  -4  29   0    2.60    0.50
   5 -29   0   11.30    1.10
  -5 -29   0   12.10    1.30
   5 -29   0   10.50    1.10
  -5  29   0   11.70    0.90
   5  29   0   10.80    1.20
  -5  29   0   11.50    1.10
   5  29   0   10.60    1.10
  -5  29   0   10.40    1.00
   5  29   0    9.70    0.90
   6 -29   0    1.30    0.70
   6 -29   0    2.40    0.70
  -6 -29   0    2.20    0.90
   6  29   0    1.90    0.80
  -6  29   0    1.60    0.50
  -6  29   0    1.40    0.70
   6  29   0    2.80    0.60
  -6  29   0    2.70    0.80
   6  29   0    2.20    0.80
   7 -29   0   -0.50    0.70
  -7 -29   0   -0.60    0.80
   7  29   0   -0.20    0.80
  -7  29   0   -0.30    0.70
   7  29   0    0.10    0.60
   7  29   0   -0.20    0.70
  -7  29   0   -0.40    0.50
   8 -29   0    1.30    0.90
  -8 -29   0    2.20    0.90
   8 -29   0    0.60    0.80
  -8  29   0    0.90    0.50
   8  29   0    1.30    0.90
  -8  29   0    2.00    0.80
   8  29   0    0.60    0.70
   0 -30   0    7.10    1.00
   0  30   0    7.00    0.90
   0  30   0    5.50    0.90
   0  30   0    6.90    0.70
  -1 -30   0    1.60    0.70
   1 -30   0    2.30    0.80
  -1  30   0    1.60    0.70
   1  30   0    0.80    0.50
  -1  30   0    1.40    0.50
   1  30   0    0.70    0.60
   1  30   0    2.10    0.80
  -1  30   0    1.00    0.70
   2 -30   0   -0.10    0.60
   2 -30   0   -0.70    0.70
  -2 -30   0   -0.90    0.50
   2  30   0   -0.20    0.60
   2  30   0    0.50    0.60
  -2  30   0   -0.40    0.70
  -2  30   0    0.10    0.40
   2  30   0    0.30    0.40
  -2  30   0   -0.40    0.60
   3 -30   0    1.80    0.70
  -3 -30   0    2.20    0.70
   3 -30   0    1.40    0.80
   3  30   0    1.80    0.70
   3  30   0    2.50    0.80
  -3  30   0    2.80    0.80
  -3  30   0    2.50    0.50
  -3  30   0    2.40    0.70
   3  30   0    1.70    0.50
   4 -30   0    4.80    0.90
  -4 -30   0    8.00    1.10
   4 -30   0    4.30    0.90
   4  30   0    5.50    0.70
  -4  30   0    5.80    0.90
  -4  30   0    5.10    0.60
  -4  30   0    4.50    0.80
   4  30   0    5.70    0.90
   4  30   0    4.80    1.00
   5 -30   0    0.00    0.70
   5 -30   0   -0.30    0.70
  -5 -30   0    0.10    0.80
   5  30   0    0.90    0.50
  -5  30   0    0.80    0.70
  -5  30   0    0.40    0.70
   5  30   0    0.50    0.70
  -5  30   0   -0.30    0.40
   5  30   0   -0.10    0.80
   6 -30   0   -0.10    0.70
   6 -30   0    0.70    0.70
  -6 -30   0    0.70    0.80
   6  30   0    1.00    0.60
  -6  30   0   -0.10    0.50
  -6  30   0    0.00    0.70
   6  30   0   -0.20    0.80
   6  30   0    0.70    0.70
  -6  30   0    0.50    0.70
  -7 -30   0   -0.40    0.80
   7 -30   0    0.50    0.80
  -7  30   0    0.10    0.70
   7  30   0    0.00    0.70
   7  30   0   -0.70    0.80
  -7  30   0   -0.20    0.50
   7  30   0    0.10    0.60
   8 -30   0    0.70    0.90
   8 -30   0    1.10    0.90
  -8 -30   0    0.00    0.90
   8  30   0   -0.30    0.60
  -8  30   0   -0.10    0.80
  -8  30   0    1.10    0.50
   8  30   0    1.10    0.90
   0 -31   0   -0.10    0.60
   0  31   0    0.30    0.40
   0  31   0    0.00    0.60
   0  31   0   -0.10    0.60
   1 -31   0    0.00    0.70
  -1 -31   0    1.00    0.80
  -1  31   0    0.30    0.40
   1  31   0   -0.30    0.70
  -1  31   0   -0.10    0.60
  -1  31   0    0.50    0.70
   1  31   0    1.10    0.50
   1  31   0   -0.20    0.60
  -2 -31   0    0.00    0.60
   2 -31   0    0.00    0.60
   2 -31   0    1.00    0.70
   2  31   0    0.20    0.40
  -2  31   0   -0.20    0.40
   2  31   0    0.20    0.70
  -2  31   0    0.40    0.70
  -2  31   0   -0.50    0.60
   2  31   0    0.80    0.70
  -3 -31   0    0.20    0.70
   3 -31   0    1.00    0.70
   3 -31   0    1.30    0.80
  -3  31   0    0.10    0.70
   3  31   0    1.10    0.70
  -3  31   0    0.80    0.40
   3  31   0    0.60    0.50
  -3  31   0    0.90    0.70
   3  31   0    1.50    0.80
  -4 -31   0    4.10    1.00
   4 -31   0    2.90    0.80
   4 -31   0    3.00    0.80
   4  31   0    3.20    0.80
  -4  31   0    4.00    0.90
   4  31   0    3.50    0.60
   4  31   0    0.60    0.80
  -4  31   0    1.90    0.50
  -4  31   0    2.10    0.70
   5 -31   0    1.00    0.70
  -5 -31   0    0.40    0.80
   5 -31   0    0.70    0.70
  -5  31   0    0.40    0.50
   5  31   0    1.10    0.80
   5  31   0    0.90    0.50
  -5  31   0    0.00    0.80
   5  31   0    0.90    0.80
  -5  31   0    0.80    0.70
  -6 -31   0    0.70    0.90
   6 -31   0    0.20    0.70
   6 -31   0    0.40    0.80
   6  31   0    0.60    0.80
   6  31   0    0.40    0.60
   6  31   0    0.90    0.80
  -6  31   0    0.10    0.70
  -6  31   0    0.50    0.70
  -6  31   0    0.20    0.50
   7 -31   0    6.00    1.10
  -7 -31   0    4.30    1.10
   7  31   0    4.80    0.80
  -7  31   0    3.80    0.60
   7  31   0    3.90    1.00
   7  31   0    4.70    1.00
  -7  31   0    4.10    0.90
   0 -32   0   13.10    1.40
   0  32   0   10.50    1.20
   0  32   0   13.30    0.90
   0  32   0   13.90    1.20
   1 -32   0   15.20    1.40
  -1 -32   0   14.50    1.50
  -1  32   0   13.80    1.00
   1  32   0   15.40    1.00
  -1  32   0   15.20    1.20
   1  32   0   12.50    1.20
  -1  32   0   16.70    1.40
   1  32   0   13.70    1.20
  -2 -32   0   -0.10    0.80
   2 -32   0    1.00    0.80
   2 -32   0    0.80    0.70
  -2  32   0    2.50    0.80
  -2  32   0    0.90    0.50
   2  32   0    0.50    0.80
   2  32   0    0.80    0.50
  -2  32   0    0.20    0.70
   2  32   0    1.10    0.70
   3 -32   0   -0.50    0.70
   3 -32   0    0.20    0.60
  -3 -32   0    0.10    0.70
  -3  32   0    0.30    0.70
   3  32   0   -0.60    0.70
  -3  32   0   -0.50    0.40
  -3  32   0   -0.20    0.70
   3  32   0    0.00    0.70
   3  32   0    0.50    0.50
   4 -32   0   -0.10    0.70
  -4 -32   0    0.50    0.90
   4 -32   0    0.50    0.70
  -4  32   0   -0.10    0.40
  -4  32   0    0.10    0.70
   4  32   0   -0.20    0.70
  -4  32   0    0.10    0.70
   4  32   0   -0.90    0.80
   4  32   0    0.40    0.50
  -5 -32   0    4.80    1.10
   5 -32   0    2.40    0.80
   5 -32   0    3.30    0.90
   5  32   0    3.00    0.60
   5  32   0    3.60    0.90
  -5  32   0    3.60    0.80
   5  32   0    4.00    1.00
  -5  32   0    3.10    0.50
  -5  32   0    5.10    1.00
   6 -32   0    0.70    0.80
  -6 -32   0    1.00    1.00
  -6  32   0    0.50    0.70
  -6  32   0   -0.30    0.80
   6  32   0    0.60    0.90
   6  32   0    0.50    0.60
  -6  32   0    0.80    0.50
   6  32   0    1.00    0.80
   7 -32   0    0.10    0.80
   7  32   0    0.80    0.60
   0 -33   0   -0.20    0.80
   0  33   0    0.30    0.80
   0  33   0    0.60    0.70
   0  33   0    0.50    0.50
  -1 -33   0    6.70    1.10
   1 -33   0    6.80    1.10
   1  33   0    4.80    1.00
   1  33   0    5.60    0.70
   1  33   0    5.80    0.90
  -1  33   0    6.50    0.70
  -1  33   0    7.90    1.00
  -1  33   0    5.50    1.00
   2 -33   0    0.40    0.80
  -2 -33   0   -0.40    0.80
   2 -33   0   -0.30    0.70
  -2  33   0    0.40    0.70
  -2  33   0   -0.80    0.70
  -2  33   0    0.00    0.50
   2  33   0   -0.40    0.50
   2  33   0   -0.20    0.70
   2  33   0   -0.70    0.70
   3 -33   0    1.50    0.80
   3 -33   0    0.60    0.80
  -3 -33   0    0.80    0.90
  -3  33   0    1.30    0.70
   3  33   0    1.50    0.60
  -3  33   0    1.90    0.50
   3  33   0    1.80    0.80
  -3  33   0    1.60    0.80
   3  33   0    2.90    0.80
   4 -33   0    0.20    0.80
  -4 -33   0    1.00    0.90
   4 -33   0    1.30    0.80
  -4  33   0   -0.50    0.40
   4  33   0    0.00    0.50
  -4  33   0   -0.20    0.70
   4  33   0    0.50    0.70
   4  33   0    0.10    0.80
  -4  33   0    0.00    0.70
   5 -33   0   -1.20    0.80
  -5 -33   0   -0.30    0.90
   5 -33   0    0.00    0.80
  -5  33   0    0.30    0.50
   5  33   0   -0.20    0.90
   5  33   0    1.00    0.80
  -5  33   0    0.10    0.70
   5  33   0    0.30    0.60
  -5  33   0   -1.20    0.70
  -6 -33   0   -0.80    0.90
   6 -33   0   -0.10    0.90
   6  33   0   -1.40    0.80
  -6  33   0    0.60    0.90
   6  33   0   -0.20    0.60
  -6  33   0   -0.10    0.50
  -6  33   0   -0.80    0.70
   6  33   0   -0.10    0.90
   0 -34   0    2.70    0.90
   0  34   0    3.60    0.90
   0  34   0    1.70    0.80
   0  34   0    3.80    0.60
   1 -34   0    7.50    1.20
  -1 -34   0    8.10    1.20
   1 -34   0    8.40    1.10
   1  34   0    9.30    1.10
  -1  34   0    9.20    1.10
   1  34   0    7.00    0.70
  -1  34   0    9.90    1.10
  -1  34   0    7.10    0.70
   1  34   0    7.00    1.10
  -2 -34   0   -1.00    0.80
   2 -34   0   -0.60    0.80
   2 -34   0   -0.50    0.70
   2  34   0   -0.70    0.50
  -2  34   0    0.80    0.80
   2  34   0   -0.50    0.70
   2  34   0   -0.30    0.80
  -2  34   0   -0.70    0.40
  -2  34   0    0.30    0.70
  -3 -34   0    1.90    1.00
   3 -34   0    2.20    0.90
   3 -34   0    1.70    0.90
  -3  34   0    1.40    0.80
   3  34   0    1.00    0.60
  -3  34   0    3.00    0.90
  -3  34   0    1.50    0.50
   3  34   0    2.50    0.80
   3  34   0    1.30    0.90
   4 -34   0   -0.20    0.80
  -4 -34   0   -0.30    0.80
   4 -34   0    1.10    0.80
   4  34   0    0.50    0.80
   4  34   0    0.00    0.60
  -4  34   0    0.20    0.80
  -4  34   0    0.10    0.80
   4  34   0   -0.80    0.80
  -4  34   0    0.10    0.50
   5 -34   0    1.10    0.90
  -5 -34   0    1.30    1.00
   5 -34   0    1.20    0.80
  -5  34   0    0.20    0.90
  -5  34   0   -0.20    0.80
   5  34   0    1.30    0.90
   5  34   0    0.50    0.90
   5  34   0    0.30    0.60
  -5  34   0    0.70    0.50
   0 -35   0    1.20    0.90
   0  35   0   -1.10    0.80
   0  35   0    0.40    0.80
   0  35   0   -0.10    0.50
   1 -35   0    8.20    1.30
   1 -35   0    7.50    1.20
  -1 -35   0    5.90    1.20
  -1  35   0    6.30    1.10
  -1  35   0    6.30    0.70
   1  35   0    5.80    1.10
   1  35   0    6.30    0.70
  -1  35   0    6.70    1.00
   1  35   0    9.20    1.10
  -2 -35   0   -0.60    0.90
   2 -35   0    1.30    0.80
   2 -35   0   -0.10    0.80
  -2  35   0    1.40    0.90
   2  35   0   -0.70    0.80
  -2  35   0    0.70    0.50
   2  35   0    1.00    0.60
  -2  35   0    1.20    0.80
   2  35   0   -0.20    0.80
   3 -35   0    0.70    0.80
   3 -35   0    1.90    0.90
  -3 -35   0    2.00    1.00
   3  35   0    2.00    0.80
  -3  35   0    2.10    0.90
  -3  35   0    1.60    0.80
   3  35   0    1.30    0.60
  -3  35   0    1.90    0.50
   3  35   0    0.90    0.90
   4 -35   0    0.90    0.90
  -4  35   0   -0.40    0.80
   4  35   0   -0.20    0.90
   0 -36   0    0.50    0.90
   0  36   0    0.90    0.90
   0  36   0    0.90    0.50
   0  36   0    1.50    0.90
   1 -36   0    3.00    0.90
  -1 -36   0    2.80    1.10
   1 -36   0    2.80    0.90
   1  36   0    3.70    0.60
  -1  36   0    3.50    0.60
  -1  36   0    2.50    0.90
  -1  36   0    3.00    1.00
   1  36   0    2.80    1.00
   1  36   0    2.10    0.90
   2 -36   0    8.40    1.20
  -2 -36   0   10.50    1.30
   2 -36   0   11.50    1.40
  -2  36   0   11.00    1.30
   2  36   0    8.40    1.20
 -14   0   1    0.20    0.70
  14   0  -1    0.40    0.80
 -13   0   1    7.00    0.90
  13   0  -1    7.90    1.10
  12   0  -1   -1.60    0.60
 -12   0   1   -0.10    0.60
  11   0  -1    8.70    1.00
 -11   0   1    6.40    0.80
  11   0  -1    6.00    0.80
 -11   0   1    5.90    0.80
  11   0  -1    6.00    0.90
  10   0  -1    1.40    0.60
 -10   0   1    0.80    0.50
 -10   0   1    0.80    0.50
  10   0  -1   -0.40    0.50
  10   0  -1    0.60    0.60
   9   0  -1    0.30    0.50
  -9   0   1    0.20    0.40
  -9   0   1    0.30    0.40
   9   0  -1    0.50    0.60
   9   0  -1   -0.20    0.40
  -8   0   1    0.20    0.20
  -8   0   1    0.50    0.40
   8   0  -1    0.50    0.40
  -8   0   1    0.60    0.40
   8   0  -1    0.20    0.40
   8   0  -1    0.30    0.50
   8   0  -1   -0.10    0.20
   7   0  -1  315.97    9.90
  -7   0   1  309.07    9.90
  -7   0   1  312.77    9.70
  -7   0   1  324.27   10.50
   7   0  -1  324.07   10.50
   7   0  -1  326.87    9.70
   7   0  -1  314.07   10.60
   6   0  -1    0.10    0.20
   6   0  -1    0.00    0.30
  -6   0   1   -0.30    0.30
   6   0  -1   -0.30    0.30
  -6   0   1    0.00    0.30
   6   0  -1    0.40    0.40
  -6   0   1   -0.30    0.20
   6   0  -1    0.10    0.30
   5   0  -1  281.17    8.70
  -5   0   1  273.67    8.60
  -5   0   1  272.17    8.40
   5   0  -1  278.87    8.60
  -5   0   1  287.37    9.20
   5   0  -1  270.27    8.50
   5   0  -1  289.87    9.20
   4   0  -1   -0.10    0.20
  -4   0   1    0.30    0.10
  -4   0   1    0.10    0.20
  -4   0   1   -0.20    0.20
   4   0  -1   -0.20    0.20
   4   0  -1    0.00    0.20
   4   0  -1    0.00    0.20
   3   0  -1 5734.03  180.28
  -3   0   1 5279.77  167.18
   3   0  -1 5157.98  176.88
   3   0  -1 5418.86  162.08
   3   0  -1 5616.94  165.98
   3   0  -1 5533.55  165.38
  -3   0   1 5339.47  162.08
  -3   0   1 5707.03  180.38
  -2   0   1   -0.30    0.10
  -2   0   1   -0.20    0.10
  -2   0   1   -0.30    0.10
  -2   0   1   -0.30    0.10
   2   0  -1   -0.10    0.10
  -2   0   1   -0.30    0.10
   2   0  -1   -0.20    0.20
  -2   0   1   -0.40    0.10
   2   0  -1   -0.20    0.10
   2   0  -1   -0.50    0.10
   1   0  -1  234.48    7.10
   1   0  -1  234.98    7.20
  -1   0   1  240.18    7.20
  -1   0   1  238.08    7.10
   0   0   1   -0.20    0.10
   0   0   1   -0.10    0.10
   0   0  -1   -0.10    0.10
  -1   0  -1  285.07    8.90
   1   0   1  274.27    8.30
   1   0   1  273.37    8.30
   1   0   1  286.17    8.90
  -1   0  -1  267.87    8.30
   1   0   1  273.97    8.50
  -1   0  -1  272.07    8.90
   1   0   1  272.17    8.10
   1   0   1  265.77    8.40
   1   0   1  271.97    8.10
  -1   0  -1  274.27    8.10
   1   0   1  270.97    8.30
   1   0   1  269.87    8.90
   2   0   1    0.30    0.10
  -2   0  -1    0.20    0.20
   2   0   1    0.20    0.10
  -2   0  -1    0.00    0.10
   2   0   1    0.20    0.10
   2   0   1    0.20    0.20
  -2   0  -1    0.00    0.20
   2   0   1   -0.10    0.10
   3   0   1   86.79    3.00
  -3   0  -1   91.79    2.80
   3   0   1   89.19    3.00
  -3   0  -1   89.69    3.00
   3   0   1   88.59    2.80
  -3   0  -1   86.39    2.80
   3   0   1   89.19    2.80
   3   0   1   89.49    2.80
  -4   0  -1    0.10    0.20
   4   0   1   -0.20    0.20
   4   0   1    0.50    0.20
   4   0   1    0.10    0.20
   4   0   1    0.20    0.20
  -4   0  -1    0.10    0.20
  -4   0  -1   -0.10    0.20
   4   0   1    0.10    0.20
   5   0   1  378.26   11.70
   5   0   1  372.06   11.50
  -5   0  -1  373.16   11.70
  -5   0  -1  382.86   12.60
   5   0   1  391.16   11.80
   5   0   1  394.36   12.60
  -5   0  -1  380.86   11.50
   5   0   1  380.96   12.50
  -6   0  -1   -0.10    0.30
   6   0   1   -0.30    0.30
   6   0   1   -0.50    0.30
   6   0   1   -0.60    0.20
  -6   0  -1    0.30    0.30
  -6   0  -1   -0.20    0.30
   6   0   1    0.20    0.30
   6   0   1   -0.50    0.30
   7   0   1    2.60    0.40
   7   0   1    2.40    0.40
  -7   0  -1    1.30    0.40
   7   0   1    2.20    0.40
  -7   0  -1    2.30    0.40
  -7   0  -1    2.10    0.40
   7   0   1    2.20    0.50
   7   0   1    1.90    0.40
   8   0   1    0.00    0.40
   8   0   1   -0.10    0.30
  -8   0  -1   -0.20    0.40
   8   0   1    0.80    0.50
   8   0   1   -0.10    0.40
  -8   0  -1   -0.30    0.30
   8   0   1   -0.10    0.40
  -8   0  -1    0.30    0.40
   9   0   1   12.70    1.00
   9   0   1   12.50    0.90
  -9   0  -1   10.20    0.70
   9   0   1   11.20    1.00
   9   0   1   11.50    0.80
  -9   0  -1   12.90    0.90
   9   0   1   11.50    0.90
  -9   0  -1   11.70    0.90
  10   0   1   -0.10    0.50
  10   0   1   -0.20    0.50
 -10   0  -1    0.80    0.50
  10   0   1   -0.40    0.60
 -10   0  -1   -0.40    0.50
  11   0   1    0.00    0.60
  11   0   1    1.50    0.70
 -11   0  -1    0.30    0.50
 -12   0  -1    0.60    0.60
  12   0   1   -0.30    0.70
  12   0   1    0.40    0.60
 -13   0  -1    1.00    0.70
  13   0   1   -0.10    0.70
 -14   0  -1    0.60    0.70
  14   0   1    0.70    0.80
 -14  -1   1    0.10    0.60
  14  -1  -1   -1.20    0.80
 -14   1   1    1.00    0.70
  14   1  -1    0.10    0.80
  13  -1  -1   -0.30    0.70
 -13  -1   1    0.40    0.60
 -13   1   1    0.40    0.60
  13   1  -1   -0.10    0.60
  12  -1  -1   -0.40    0.50
 -12  -1   1    0.50    0.60
 -12   1   1   -0.40    0.50
  12   1  -1    0.10    0.60
  11  -1  -1   36.90    2.00
  11  -1  -1   38.00    1.90
 -11  -1   1   36.60    1.70
 -11  -1   1   35.60    1.70
  11   1  -1   37.10    1.80
  11   1  -1   37.70    1.80
 -11   1   1   35.70    1.70
 -11   1   1   40.40    1.80
  11   1  -1   38.80    2.00
  10  -1  -1   11.20    1.00
  10  -1  -1   10.00    0.90
 -10  -1   1   13.10    1.00
  10  -1  -1   14.30    1.00
 -10  -1   1   12.80    1.00
  10   1  -1   11.00    0.90
 -10   1   1   12.60    1.00
  10   1  -1   12.80    1.10
 -10   1   1   13.20    1.00
  10   1  -1   12.70    1.10
  -9  -1   1   19.70    1.10
  -9  -1   1   17.50    1.10
   9  -1  -1   17.20    1.10
   9  -1  -1   19.40    1.20
   9  -1  -1   20.30    1.30
   9   1  -1   16.40    1.10
   9   1  -1   20.00    1.30
  -9   1   1   18.30    1.10
   9   1  -1   20.80    1.20
  -9   1   1   22.10    1.10
  -8  -1   1   49.90    1.90
   8  -1  -1   49.30    2.10
   8  -1  -1   48.80    1.80
   8  -1  -1   50.59    1.90
   8  -1  -1   46.90    1.90
  -8  -1   1   50.29    1.80
  -8  -1   1   48.60    1.80
  -8   1   1   47.80    1.80
  -8   1   1   51.69    1.90
   8   1  -1   50.89    2.10
  -8   1   1   48.10    1.80
   8   1  -1   50.19    1.90
   8   1  -1   48.00    1.90
  -7  -1   1   44.70    1.60
  -7  -1   1   43.50    1.70
  -7  -1   1   46.00    1.60
   7  -1  -1   43.70    1.70
   7  -1  -1   42.70    1.60
   7  -1  -1   44.30    1.70
   7  -1  -1   45.60    1.90
   7   1  -1   41.80    1.70
   7   1  -1   42.90    1.70
  -7   1   1   44.30    1.60
   7   1  -1   42.60    1.80
  -7   1   1   43.60    1.60
   7   1  -1   44.30    1.70
  -7   1   1   44.40    1.70
   6  -1  -1   28.60    1.20
  -6  -1   1   28.70    1.20
  -6  -1   1   29.20    1.10
  -6  -1   1   28.80    1.20
   6  -1  -1   30.70    1.10
   6  -1  -1   29.30    1.30
   6  -1  -1   28.60    1.20
  -6   1   1   29.60    1.20
  -6   1   1   28.60    1.20
   6   1  -1   27.90    1.20
   6   1  -1   29.00    1.30
   6   1  -1   27.70    1.20
  -6   1   1   30.10    1.10
   6   1  -1   29.60    1.20
  -5  -1   1    2.40    0.30
  -5  -1   1    2.50    0.30
  -5  -1   1    2.50    0.30
   5  -1  -1    0.90    0.30
   5  -1  -1    2.80    0.30
   5  -1  -1    2.70    0.40
   5  -1  -1    2.30    0.20
   5   1  -1    2.00    0.40
   5   1  -1    2.30    0.40
  -5   1   1    2.20    0.30
   5   1  -1    2.50    0.30
  -5   1   1    1.70    0.30
   5   1  -1    2.70    0.40
   5   1  -1    2.10    0.30
  -5   1   1    3.40    0.40
  -4  -1   1   48.20    1.60
   4  -1  -1   44.70    1.70
  -4  -1   1   44.40    1.60
  -4  -1   1   45.70    1.60
   4  -1  -1   46.60    1.60
   4  -1  -1   47.60    1.60
   4  -1  -1   48.30    1.60
   4   1  -1   46.80    1.60
   4   1  -1   44.90    1.60
  -4   1   1   45.90    1.60
  -4   1   1   46.40    1.60
   4   1  -1   46.80    1.70
  -4   1   1   46.60    1.70
   4   1  -1   47.80    1.60
  -3  -1   1  931.91   28.60
   3  -1  -1  973.30   31.20
   3  -1  -1  906.61   29.30
   3  -1  -1  949.31   28.60
   3  -1  -1  975.30   29.20
   3  -1  -1  976.70   28.60
  -3  -1   1  941.41   29.20
  -3  -1   1 1007.20   31.50
   3  -1  -1  975.20   31.40
   3   1  -1  980.00   29.30
   3   1  -1  975.00   29.20
  -3   1   1 1017.10   31.20
   3   1  -1  962.90   28.60
  -3   1   1  959.50   28.60
  -3   1   1  919.81   29.20
   3   1  -1  982.20   31.20
   2  -1  -1    2.60    0.20
   2  -1  -1    2.30    0.20
  -2  -1   1    2.50    0.20
   2  -1  -1    2.40    0.20
   2  -1  -1    2.30    0.20
  -2  -1   1    2.10    0.20
  -2  -1   1    2.20    0.20
  -2   1   1    2.30    0.20
   2   1  -1    2.70    0.30
   2   1  -1    1.90    0.20
  -2   1   1    2.30    0.20
   2   1  -1    2.50    0.20
   2   1  -1    2.20    0.20
  -2   1   1    2.60    0.20
  -2   1   1    2.50    0.20
   2   1  -1    2.70    0.20
  -2   1   1    2.50    0.20
  -1  -1   1  735.43   21.80
  -1  -1   1  714.63   23.90
   1  -1  -1  763.92   23.80
   1  -1  -1  758.42   22.20
  -1  -1   1  710.13   22.20
   1  -1  -1  715.33   21.70
  -1  -1   1  736.93   21.80
   1  -1  -1  702.73   22.30
  -1  -1   1  747.03   22.30
  -1   1   1  753.62   22.20
   1   1  -1  724.63   21.70
  -1   1   1  741.83   21.70
   1   1  -1  721.93   23.80
   1   1  -1  739.83   22.30
   0  -1   1  360.26   11.50
   0  -1   1  398.86   11.80
   1  -1   1   58.69    1.90
   1  -1   1   59.19    1.80
  -1  -1  -1   59.49    2.00
   1  -1   1   60.49    2.00
  -1  -1  -1   58.39    1.80
  -1  -1  -1   58.99    1.80
   1  -1   1   56.79    1.80
   1  -1   1   59.29    1.90
   1  -1   1   59.49    2.00
   1   1   1   58.69    1.80
  -1   1  -1   59.39    1.80
  -1   1  -1   61.99    2.00
   1   1   1   57.39    1.90
   1   1   1   57.59    1.80
   1   1   1   59.99    1.80
   1   1   1   58.19    1.80
   1   1   1   60.39    1.90
   1   1   1   61.09    2.00
   1   1   1   60.29    2.00
  -1   1  -1   58.39    1.80
   2  -1   1   65.09    2.10
  -2  -1  -1   67.79    2.30
   2  -1   1   67.19    2.20
   2  -1   1   67.19    2.20
   2  -1   1   69.69    2.20
  -2  -1  -1   67.39    2.10
   2  -1   1   65.49    2.10
  -2  -1  -1   68.39    2.10
   2  -1   1   68.59    2.30
   2  -1   1   65.09    2.30
  -2   1  -1   67.89    2.10
   2   1   1   69.79    2.30
   2   1   1   70.89    2.30
  -2   1  -1   68.19    2.10
   2   1   1   67.59    2.20
   2   1   1   68.09    2.10
  -2   1  -1   66.89    2.30
   2   1   1   63.79    2.10
   3  -1   1 1165.28   37.00
  -3  -1  -1 1105.59   34.50
   3  -1   1 1127.69   33.70
   3  -1   1 1113.99   34.40
  -3  -1  -1 1170.78   33.70
  -3  -1  -1 1176.78   36.80
   3  -1   1 1150.18   36.80
   3  -1   1 1181.28   34.50
   3  -1   1 1079.59   33.70
  -3   1  -1 1129.49   33.70
   3   1   1 1130.59   34.50
   3   1   1 1146.19   37.10
   3   1   1 1124.79   34.50
  -3   1  -1 1168.08   36.80
  -3   1  -1 1189.78   34.50
   3   1   1 1128.49   36.80
   3   1   1 1070.09   33.70
  -4  -1  -1   24.20    0.90
  -4  -1  -1   25.80    0.90
   4  -1   1   24.40    1.00
   4  -1   1   24.90    0.90
   4  -1   1   24.40    1.00
  -4  -1  -1   25.50    1.10
   4  -1   1   23.80    0.90
  -4   1  -1   24.10    1.10
  -4   1  -1   24.20    0.90
   4   1   1   22.60    0.90
   4   1   1   23.60    1.00
   4   1   1   25.00    1.00
  -4   1  -1   25.30    0.90
   4   1   1   24.60    0.90
   5  -1   1   56.59    1.90
   5  -1   1   52.89    1.90
  -5  -1  -1   54.89    1.90
   5  -1   1   53.59    2.00
   5  -1   1   53.39    1.90
  -5  -1  -1   53.99    1.90
  -5  -1  -1   57.69    2.10
   5  -1   1   56.79    2.10
  -5   1  -1   55.39    1.90
   5   1   1   54.49    1.90
  -5   1  -1   54.39    2.10
   5   1   1   57.09    2.00
  -5   1  -1   53.39    1.90
   5   1   1   56.59    2.00
   5   1   1   55.49    1.90
   5   1   1   54.39    2.10
  -6  -1  -1  106.39    3.40
   6  -1   1  104.29    3.50
  -6  -1  -1  105.79    3.50
   6  -1   1  109.29    3.70
   6  -1   1  107.89    3.40
   6  -1   1  106.19    3.50
  -6  -1  -1  107.59    3.80
  -6   1  -1  105.59    3.40
  -6   1  -1  106.59    3.80
   6   1   1  106.39    3.50
   6   1   1  103.49    3.40
   6   1   1  111.19    3.70
  -6   1  -1  106.59    3.50
   6   1   1  100.29    3.50
   6   1   1  106.39    3.80
   7  -1   1    6.10    0.60
   7  -1   1    5.80    0.60
  -7  -1  -1    5.90    0.50
   7  -1   1    6.50    0.50
   7  -1   1    4.40    0.50
   7  -1   1    5.60    0.60
  -7  -1  -1    5.90    0.60
  -7   1  -1    5.50    0.50
  -7   1  -1    5.70    0.60
  -7   1  -1    5.90    0.50
   7   1   1    3.70    0.50
   7   1   1    5.80    0.50
   7   1   1    5.40    0.50
   7   1   1    5.80    0.50
   7   1   1    6.00    0.60
  -8  -1  -1    0.20    0.40
   8  -1   1   -0.20    0.40
  -8  -1  -1   -0.10    0.30
  -8  -1  -1    0.00    0.40
   8  -1   1   -0.40    0.30
   8  -1   1   -0.10    0.40
   8  -1   1    0.50    0.40
   8  -1   1   -0.10    0.30
   8   1   1   -0.20    0.30
   8   1   1    0.30    0.40
   8   1   1    0.00    0.40
  -8   1  -1   -0.20    0.20
   8   1   1    0.10    0.40
   8   1   1    0.30    0.40
  -8   1  -1    0.00    0.40
  -8   1  -1    0.30    0.40
  -9  -1  -1   15.30    1.00
   9  -1   1   15.30    1.00
   9  -1   1   16.60    0.90
   9  -1   1   15.70    1.20
  -9  -1  -1   13.50    0.90
   9  -1   1   17.10    1.10
   9  -1   1   14.30    1.10
  -9  -1  -1   15.60    1.00
   9   1   1   16.20    1.10
  -9   1  -1   14.00    0.80
  -9   1  -1   15.40    1.10
   9   1   1   14.80    1.10
   9   1   1   13.70    0.90
  -9   1  -1   16.40    1.00
   9   1   1   16.20    1.00
   9   1   1   16.40    1.00
  -9   1  -1   14.00    1.00
  10  -1   1   26.70    1.60
 -10  -1  -1   26.80    1.40
  10  -1   1   25.80    1.40
 -10  -1  -1   24.40    1.40
  10  -1   1   25.40    1.40
  10   1   1   25.10    1.50
  10   1   1   25.60    1.40
 -10   1  -1   27.00    1.40
 -10   1  -1   27.00    1.40
  10   1   1   26.80    1.60
  11  -1   1    2.20    0.70
 -11  -1  -1    0.40    0.50
  11  -1   1    1.10    0.60
  11   1   1    1.10    0.60
  11   1   1    1.00    0.70
 -11   1  -1    1.60    0.60
  12  -1   1    0.80    0.70
 -12  -1  -1    0.30    0.60
  12  -1   1   -0.10    0.60
 -12   1  -1    1.20    0.60
  12   1   1   -0.90    0.60
  12   1   1   -0.30    0.70
 -13  -1  -1    1.20    0.70
  13  -1   1   -0.10    0.80
 -13   1  -1    0.30    0.60
  13   1   1    0.60    0.70
  13   1   1    1.50    0.80
 -14  -1  -1   13.80    1.30
  14  -1   1   13.50    1.40
 -14   1  -1   14.80    1.30
  14   1   1   12.60    1.40
  14  -2  -1    3.20    0.90
 -14  -2   1    2.90    0.80
 -14   2   1    2.10    0.80
  14   2  -1    2.90    0.80
 -13  -2   1    0.60    0.60
  13  -2  -1    0.80    0.70
 -13   2   1   -0.10    0.60
  13   2  -1    0.60    0.80
 -12  -2   1   14.10    1.10
  12  -2  -1   14.80    1.30
  12   2  -1   14.00    1.20
 -12   2   1   15.00    1.20
  11  -2  -1   12.90    1.20
  11  -2  -1   13.20    1.10
 -11  -2   1   14.50    1.10
 -11  -2   1   14.10    1.10
  11   2  -1   15.20    1.20
 -11   2   1   13.90    1.10
  11   2  -1   16.50    1.40
  11   2  -1   13.40    1.10
 -11   2   1   14.80    1.10
 -10  -2   1   17.90    1.20
  10  -2  -1   15.10    1.30
 -10  -2   1   16.60    1.10
  10  -2  -1   16.20    1.10
  10  -2  -1   16.60    1.20
  10   2  -1   16.20    1.10
  10   2  -1   15.30    1.30
 -10   2   1   17.30    1.10
 -10   2   1   17.10    1.10
  10   2  -1   17.30    1.20
   9  -2  -1    0.40    0.50
   9  -2  -1    0.40    0.60
   9  -2  -1    0.30    0.50
  -9  -2   1    0.60    0.40
  -9  -2   1    0.50    0.40
  -9   2   1    0.30    0.50
   9   2  -1   -0.20    0.50
   9   2  -1    0.70    0.60
  -9   2   1   -0.10    0.40
   9   2  -1    0.30    0.50
   8  -2  -1    2.40    0.40
  -8  -2   1    2.40    0.50
  -8  -2   1    2.60    0.40
   8  -2  -1    2.70    0.60
   8  -2  -1    2.30    0.30
  -8  -2   1    2.40    0.30
   8  -2  -1    3.10    0.50
   8   2  -1    2.70    0.50
   8   2  -1    2.70    0.50
  -8   2   1    3.00    0.50
   8   2  -1    2.70    0.60
  -8   2   1    3.90    0.50
  -8   2   1    2.80    0.30
   7  -2  -1  179.78    6.10
   7  -2  -1  178.18    5.90
  -7  -2   1  180.48    6.00
   7  -2  -1  175.68    5.70
  -7  -2   1  177.38    5.60
   7  -2  -1  178.38    5.60
  -7  -2   1  181.38    5.70
  -7   2   1  177.78    5.60
   7   2  -1  174.48    5.70
   7   2  -1  176.08    6.10
  -7   2   1  177.78    5.70
  -7   2   1  180.18    5.90
   7   2  -1  179.08    5.60
  -7   2   1  178.68    6.10
   7   2  -1  178.58    5.80
  -6  -2   1  122.89    4.00
   6  -2  -1  130.09    4.40
   6  -2  -1  124.79    4.00
   6  -2  -1  128.09    4.20
  -6  -2   1  119.09    4.00
   6  -2  -1  126.79    4.00
  -6  -2   1  129.29    4.20
  -6   2   1  121.69    3.90
  -6   2   1  125.59    4.30
   6   2  -1  125.49    4.00
  -6   2   1  122.79    4.00
   6   2  -1  119.49    4.10
   6   2  -1  124.99    4.00
  -5  -2   1   43.20    1.60
   5  -2  -1   44.90    1.50
  -5  -2   1   45.00    1.60
   5  -2  -1   47.50    1.60
  -5  -2   1   42.80    1.50
   5  -2  -1   44.60    1.60
  -5   2   1   42.50    1.60
   5   2  -1   44.60    1.60
  -5   2   1   43.90    1.50
   5   2  -1   43.50    1.60
   5   2  -1   43.80    1.60
   5   2  -1   43.10    1.70
  -5   2   1   44.50    1.70
   4  -2  -1  595.24   18.10
  -4  -2   1  591.84   17.80
   4  -2  -1  584.24   19.40
  -4  -2   1  574.54   18.20
   4  -2  -1  594.34   17.80
   4  -2  -1  600.34   17.80
  -4  -2   1  620.64   19.50
   4  -2  -1  608.44   19.50
  -4   2   1  616.64   19.40
   4   2  -1  597.04   19.50
   4   2  -1  610.94   18.20
  -4   2   1  591.74   17.80
   4   2  -1  585.14   18.20
   4   2  -1  602.74   17.80
  -4   2   1  593.44   18.20
  -3  -2   1 4582.44  135.59
   3  -2  -1 4688.83  148.59
   3  -2  -1 4661.73  147.99
  -3  -2   1 4683.73  148.79
   3  -2  -1 4567.14  138.29
  -3  -2   1 4532.35  138.29
   3  -2  -1 4724.53  135.49
   3   2  -1 4508.75  138.29
  -3   2   1 4597.94  135.39
  -3   2   1 4398.86  138.19
  -3   2   1 4451.95  135.39
   3   2  -1 4546.75  135.59
   3   2  -1 4376.36  138.69
  -3   2   1 4647.14  147.89
   3   2  -1 4600.24  147.89
   2  -2  -1 1820.22   56.99
   2  -2  -1 1851.01   57.09
   2  -2  -1 1799.42   53.19
  -2  -2   1 1755.02   57.29
  -2  -2   1 1691.33   53.19
  -2  -2   1 1793.92   52.29
   2  -2  -1 1768.02   52.09
  -2   2   1 1860.81   57.19
   2   2  -1 1733.23   53.29
  -2   2   1 1661.03   56.99
   2   2  -1 1690.53   52.09
  -2   2   1 1746.33   52.09
   2   2  -1 1866.11   56.99
   2   2  -1 1750.42   53.29
  -2   2   1 1738.93   52.19
  -2   2   1 1733.83   53.29
  -2   2   1 1677.63   53.19
   2   2  -1 1689.63   53.29
   1  -2  -1    0.90    0.10
  -1  -2   1    0.80    0.10
  -1  -2   1    0.80    0.10
   1  -2  -1    0.70    0.10
   1  -2  -1    1.00    0.10
  -1  -2   1    1.10    0.20
   1  -2  -1    1.10    0.10
  -1   2   1    0.40    0.10
   1   2  -1    1.30    0.20
  -1   2   1    1.20    0.10
   1   2  -1    1.10    0.10
   1   2  -1    0.80    0.10
   1   2  -1    0.90    0.10
  -1   2   1    0.40    0.10
  -1   2   1    1.10    0.10
   0  -2   1  501.95   14.70
   0  -2   1  511.75   15.40
   0  -2  -1  489.15   16.20
   0  -2   1  493.05   15.00
   0  -2   1  474.85   14.70
   0   2  -1  501.45   14.70
   0   2   1  482.15   15.40
   0   2  -1  510.35   16.10
   0   2  -1  488.65   15.00
   1  -2   1    2.70    0.20
   1  -2   1    2.70    0.20
   1  -2   1    2.70    0.20
  -1  -2  -1    2.90    0.20
   1  -2   1    3.00    0.20
  -1  -2  -1    3.10    0.20
  -1  -2  -1    2.90    0.20
   1  -2   1    3.00    0.20
  -1   2  -1    2.80    0.20
   1   2   1    2.20    0.20
   1   2   1    2.80    0.20
   1   2   1    2.90    0.20
   1   2   1    3.00    0.20
   1   2   1    2.80    0.20
   1   2   1    2.50    0.20
  -1   2  -1    2.90    0.20
  -1   2  -1    2.70    0.20
   1   2   1    2.80    0.20
   2  -2   1  127.69    4.10
   2  -2   1  124.09    3.90
  -2  -2  -1  127.29    4.10
   2  -2   1  122.29    4.10
  -2  -2  -1  126.49    3.70
   2  -2   1  122.69    3.80
  -2  -2  -1  120.69    3.80
   2  -2   1  122.29    3.80
   2  -2   1  122.39    3.90
   2  -2   1  127.59    3.80
  -2   2  -1  121.59    3.80
   2   2   1  119.09    3.80
  -2   2  -1  122.89    3.70
   2   2   1  120.29    3.70
  -2   2  -1  127.19    4.10
   2   2   1  126.59    4.10
   2   2   1  125.99    4.10
   2   2   1  116.19    3.80
  -3  -2  -1   92.19    2.90
  -3  -2  -1   95.39    3.20
   3  -2   1   93.29    2.90
   3  -2   1   98.09    3.20
   3  -2   1   94.89    3.00
   3  -2   1   97.99    3.20
  -3  -2  -1   95.49    3.00
   3  -2   1   94.59    3.00
   3   2   1   88.99    3.00
  -3   2  -1   94.99    3.20
   3   2   1   92.49    3.20
   3   2   1   97.49    3.20
  -3   2  -1   95.59    3.00
  -3   2  -1   94.29    2.90
   3   2   1   93.49    2.90
   4  -2   1    1.70    0.30
   4  -2   1    1.30    0.30
   4  -2   1    1.30    0.30
  -4  -2  -1    1.30    0.30
   4  -2   1    1.70    0.20
  -4  -2  -1    1.30    0.30
   4  -2   1    0.90    0.20
  -4  -2  -1    1.40    0.30
   4  -2   1    0.90    0.20
   4   2   1    1.40    0.30
   4   2   1    1.60    0.30
   4   2   1    1.40    0.30
   4   2   1    1.30    0.30
   4   2   1    0.30    0.20
  -4   2  -1    1.40    0.30
  -4   2  -1    1.40    0.30
  -4   2  -1    1.50    0.30
  -5  -2  -1  132.49    4.20
  -5  -2  -1  134.99    4.60
   5  -2   1  130.39    4.20
   5  -2   1  127.49    4.10
  -5  -2  -1  131.39    4.10
   5  -2   1  132.69    4.50
   5  -2   1  133.59    4.30
   5  -2   1  131.99    4.50
   5   2   1  130.19    4.20
  -5   2  -1  133.09    4.10
   5   2   1  140.49    4.60
   5   2   1  130.69    4.10
  -5   2  -1  133.79    4.60
   5   2   1  131.09    4.30
   5   2   1  131.89    4.50
  -5   2  -1  130.29    4.20
   6  -2   1    1.90    0.40
   6  -2   1    1.00    0.30
  -6  -2  -1    1.80    0.40
  -6  -2  -1    1.70    0.40
   6  -2   1    2.10    0.40
  -6  -2  -1    1.10    0.30
  -6  -2  -1    1.20    0.30
   6  -2   1    1.70    0.40
   6   2   1    1.40    0.30
  -6   2  -1    1.80    0.40
   6   2   1    0.80    0.30
  -6   2  -1    1.80    0.40
   6   2   1    1.40    0.40
   6   2   1    1.70    0.30
   6   2   1    1.40    0.40
  -6   2  -1    1.70    0.40
   7  -2   1    4.30    0.40
   7  -2   1    4.50    0.60
  -7  -2  -1    4.10    0.50
   7  -2   1    3.90    0.50
   7  -2   1    3.30    0.50
  -7  -2  -1    3.90    0.50
   7  -2   1    4.60    0.60
  -7   2  -1    4.60    0.60
  -7   2  -1    4.50    0.50
   7   2   1    3.40    0.50
  -7   2  -1    4.00    0.50
   7   2   1    4.20    0.50
   7   2   1    4.60    0.50
   7   2   1    4.00    0.50
  -8  -2  -1   17.00    0.90
   8  -2   1   18.40    1.00
  -8  -2  -1   17.70    1.00
   8  -2   1   17.30    0.90
   8  -2   1   17.10    1.10
   8  -2   1   17.00    0.90
  -8  -2  -1   16.10    1.00
   8  -2   1   16.10    1.00
   8   2   1   15.80    1.00
   8   2   1   19.00    1.10
  -8   2  -1   17.40    1.00
   8   2   1   18.30    0.90
  -8   2  -1   17.30    1.00
   8   2   1   17.00    1.00
   9  -2   1   33.90    1.50
  -9  -2  -1   32.40    1.50
   9  -2   1   34.80    1.60
  -9  -2  -1   33.90    1.50
  -9  -2  -1   32.40    1.50
   9  -2   1   33.30    1.70
  -9   2  -1   33.60    1.50
   9   2   1   33.90    1.60
   9   2   1   32.20    1.50
   9   2   1   35.80    1.50
   9   2   1   33.60    1.40
  -9   2  -1   32.30    1.50
   9   2   1   34.90    1.70
  10  -2   1   15.20    1.10
  10  -2   1   11.80    1.10
 -10  -2  -1   13.60    1.00
  10  -2   1   14.00    1.20
  10   2   1   15.30    1.20
 -10   2  -1   13.80    1.10
 -10   2  -1   13.70    1.10
  10   2   1   15.00    1.10
  11  -2   1    0.60    0.60
 -11  -2  -1   -0.10    0.50
  11  -2   1   -0.40    0.50
  11   2   1   -0.40    0.60
 -11   2  -1   -0.90    0.50
  11   2   1    0.10    0.50
 -12  -2  -1    6.10    0.80
  12  -2   1    6.00    0.90
  12  -2   1    5.60    0.90
 -12   2  -1    5.40    0.80
  12   2   1    5.60    0.90
  12   2   1    5.70    0.80
  13  -2   1    0.20    0.80
 -13  -2  -1   -0.60    0.60
  13   2   1   -0.30    0.70
 -13   2  -1    0.10    0.60
  13   2   1   -0.90    0.70
 -14  -2  -1    0.50    0.70
  14  -2   1   -1.30    0.80
  14   2   1   -0.30    0.70
 -14   2  -1   -0.30    0.70
  14  -3  -1   -1.00    0.80
 -14  -3   1    1.00    0.70
 -14   3   1    0.60    0.70
  14   3  -1    0.70    0.80
  13  -3  -1    3.50    0.80
 -13  -3   1    3.10    0.70
  13   3  -1    4.40    0.90
 -13   3   1    5.20    0.80
  12  -3  -1    2.60    0.70
  12  -3  -1    3.50    0.80
 -12  -3   1    3.60    0.70
  12   3  -1    4.20    0.80
 -12   3   1    2.80    0.60
  12   3  -1    2.20    0.80
  11  -3  -1    8.60    0.90
  11  -3  -1   12.00    1.10
 -11  -3   1   11.40    1.00
  11   3  -1    9.40    1.00
 -11   3   1   10.50    0.90
 -11   3   1   10.30    0.90
  11   3  -1   10.70    1.00
  10  -3  -1    6.20    0.90
  10  -3  -1    6.80    0.80
 -10  -3   1    5.90    0.70
 -10  -3   1    5.60    0.70
  10  -3  -1    3.90    0.70
 -10   3   1    6.00    0.70
  10   3  -1    5.40    0.80
  10   3  -1    6.80    0.80
 -10   3   1    5.80    0.70
  10   3  -1    7.00    0.90
  -9  -3   1   20.90    1.10
   9  -3  -1   18.90    1.30
   9  -3  -1   20.90    1.20
   9  -3  -1   21.10    1.20
  -9  -3   1   21.20    1.20
  -9   3   1   20.40    1.20
  -9   3   1   18.80    1.10
   9   3  -1   20.20    1.20
   9   3  -1   21.10    1.40
   9   3  -1   18.50    1.20
   8  -3  -1    9.70    0.50
  -8  -3   1    9.00    0.70
   8  -3  -1   10.20    0.80
  -8  -3   1    8.20    0.70
   8  -3  -1   10.30    0.70
   8  -3  -1   10.10    0.90
   8   3  -1    9.90    0.90
   8   3  -1    9.30    0.70
   8   3  -1   11.00    0.80
  -8   3   1    8.80    0.50
  -8   3   1    8.10    0.70
  -8   3   1   10.10    0.80
  -8   3   1    9.80    0.70
   7  -3  -1   -0.10    0.10
  -7  -3   1   -0.20    0.20
  -7  -3   1   -0.60    0.30
   7  -3  -1    0.40    0.30
   7  -3  -1   -0.70    0.20
  -7  -3   1   -0.50    0.30
   7  -3  -1    0.00    0.30
   7  -3  -1    0.50    0.40
   7   3  -1    0.80    0.40
   7   3  -1   -0.40    0.30
  -7   3   1    0.30    0.40
   7   3  -1   -0.50    0.40
   7   3  -1    0.10    0.30
  -7   3   1    0.40    0.30
  -7   3   1    0.00    0.30
   6  -3  -1    6.60    0.60
   6  -3  -1    6.30    0.50
  -6  -3   1    6.00    0.50
   6  -3  -1    5.40    0.40
   6  -3  -1    4.90    0.50
  -6  -3   1    5.40    0.40
  -6  -3   1    6.20    0.50
  -6   3   1    5.70    0.50
   6   3  -1    7.20    0.60
   6   3  -1    5.90    0.50
  -6   3   1    5.40    0.50
  -6   3   1    5.70    0.50
   6   3  -1    5.50    0.50
  -5  -3   1    3.20    0.30
  -5  -3   1    3.60    0.40
   5  -3  -1    3.10    0.20
  -5  -3   1    2.70    0.40
   5  -3  -1    3.90    0.40
   5  -3  -1    2.70    0.30
   5  -3  -1    3.20    0.40
   5  -3  -1    3.70    0.40
   5   3  -1    3.40    0.40
   5   3  -1    2.80    0.40
   5   3  -1    3.00    0.40
  -5   3   1    3.50    0.40
   5   3  -1    3.40    0.40
  -5   3   1    3.10    0.40
  -5   3   1    2.80    0.40
   4  -3  -1  148.99    4.70
   4  -3  -1  156.08    4.90
  -4  -3   1  143.99    4.70
  -4  -3   1  156.88    5.00
   4  -3  -1  132.99    5.00
   4  -3  -1  154.98    4.60
  -4  -3   1  151.88    4.60
  -4   3   1  147.09    4.70
   4   3  -1  148.59    4.60
  -4   3   1  150.58    4.60
   4   3  -1  149.09    4.70
   4   3  -1  153.38    5.10
  -4   3   1  153.18    5.00
   4   3  -1  152.18    4.70
  -3  -3   1   98.09    3.20
   3  -3  -1   93.89    2.90
  -3  -3   1   93.09    3.00
   3  -3  -1   95.69    3.00
   3  -3  -1   99.29    3.10
  -3  -3   1   96.09    2.90
   3  -3  -1   91.89    3.20
  -3   3   1   89.89    3.00
  -3   3   1   93.69    2.90
   3   3  -1   90.99    3.20
  -3   3   1   95.99    3.20
   3   3  -1   93.69    3.00
  -3   3   1   95.69    2.90
   3   3  -1   94.19    3.00
   3   3  -1   94.19    3.00
   3   3  -1   92.89    2.90
  -2  -3   1   68.99    2.10
   2  -3  -1   66.49    2.10
   2  -3  -1   66.29    2.10
   2  -3  -1   62.89    2.20
   2  -3  -1   69.09    2.30
  -2  -3   1   66.59    2.10
   2  -3  -1   69.09    2.20
  -2  -3   1   67.79    2.30
  -2   3   1   67.29    2.10
   2   3  -1   68.19    2.30
   2   3  -1   66.59    2.10
  -2   3   1   64.69    2.10
   2   3  -1   66.09    2.10
   2   3  -1   64.49    2.10
  -2   3   1   65.79    2.00
   1  -3  -1   99.49    3.20
  -1  -3   1   98.69    2.90
   1  -3  -1   97.49    3.20
   1  -3  -1  100.79    2.90
  -1  -3   1   97.19    3.00
  -1  -3   1  101.39    3.20
   1   3  -1   98.99    3.20
   1   3  -1   96.19    2.90
  -1   3   1   96.99    3.00
  -1   3   1   86.69    3.00
  -1   3   1   98.59    2.90
  -1   3   1   90.39    2.90
   1   3  -1   94.89    3.00
   1   3  -1   99.99    3.00
   0  -3  -1   46.50    1.60
   0  -3  -1   48.60    1.60
   0  -3   1   46.90    1.50
   0  -3   1   49.60    1.60
   0  -3   1   48.20    1.50
   0   3   1   48.00    1.50
   0   3   1   47.10    1.50
   0   3   1   49.40    1.40
   0   3   1   47.70    1.50
   0   3  -1   47.40    1.50
   0   3  -1   47.30    1.50
   0   3   1   48.00    1.40
   0   3  -1   50.99    1.60
   1  -3   1   41.10    1.30
   1  -3   1   40.30    1.30
  -1  -3  -1   38.30    1.40
  -1  -3  -1   41.90    1.30
   1  -3   1   41.70    1.30
  -1  -3  -1   41.30    1.30
   1  -3   1   41.70    1.40
   1  -3   1   41.70    1.30
   1  -3   1   40.10    1.30
  -1   3  -1   40.00    1.30
  -1   3  -1   40.10    1.40
  -1   3  -1   40.10    1.30
  -1   3  -1   40.80    1.40
   1   3   1   41.80    1.30
   1   3   1   40.90    1.40
  -1   3  -1   42.20    1.30
   1   3   1   40.10    1.30
   1   3   1   43.10    1.30
   2  -3   1 3879.81  128.89
   2  -3   1 3961.30  118.09
   2  -3   1 3884.01  121.99
   2  -3   1 3953.20  123.99
  -2  -3  -1 3918.41  120.39
  -2  -3  -1 3940.61  118.09
   2  -3   1 4018.40  120.59
  -2  -3  -1 4042.30  129.99
   2  -3   1 4041.80  120.89
  -2  -3  -1 3957.00  128.89
   2  -3   1 4072.29  129.89
   2   3   1 4247.08  128.99
   2   3   1 3943.11  129.89
  -2   3  -1 4116.19  129.09
  -2   3  -1 4137.79  118.19
  -2   3  -1 3971.40  120.49
   2   3   1 3803.12  120.39
   2   3   1 3844.82  117.99
  -3  -3  -1    1.60    0.20
   3  -3   1    1.10    0.20
   3  -3   1    0.80    0.20
  -3  -3  -1    0.90    0.30
  -3  -3  -1    1.20    0.20
   3  -3   1    0.90    0.20
   3  -3   1    0.90    0.20
   3  -3   1    1.30    0.30
  -3  -3  -1    1.30    0.20
   3  -3   1    1.20    0.20
  -3   3  -1    1.10    0.20
  -3   3  -1    1.30    0.30
   3   3   1    0.80    0.30
   3   3   1    1.20    0.20
   3   3   1    1.00    0.20
   3   3   1    0.80    0.20
  -3   3  -1    0.80    0.20
   4  -3   1    1.90    0.30
  -4  -3  -1    2.00    0.30
  -4  -3  -1    1.80    0.30
  -4  -3  -1    1.80    0.30
   4  -3   1    1.80    0.30
   4  -3   1    1.90    0.30
  -4  -3  -1    1.60    0.30
   4  -3   1    1.60    0.30
   4  -3   1    1.60    0.30
  -4   3  -1    2.10    0.30
   4   3   1    1.90    0.30
   4   3   1    2.10    0.30
   4   3   1    1.80    0.30
  -4   3  -1    2.20    0.30
  -4   3  -1    1.70    0.30
   4   3   1    1.40    0.30
   5  -3   1    6.80    0.50
  -5  -3  -1    6.20    0.50
   5  -3   1    7.50    0.50
   5  -3   1    6.20    0.50
  -5  -3  -1    6.80    0.60
  -5  -3  -1    6.80    0.50
   5  -3   1    7.20    0.50
  -5  -3  -1    7.20    0.50
   5  -3   1    6.40    0.50
   5  -3   1    6.90    0.60
  -5   3  -1    6.70    0.60
   5   3   1    6.80    0.50
   5   3   1    8.40    0.60
   5   3   1    6.50    0.50
   5   3   1    6.20    0.50
   5   3   1    6.50    0.50
  -5   3  -1    7.70    0.50
  -5   3  -1    7.10    0.50
   6  -3   1   10.40    0.70
  -6  -3  -1    9.90    0.70
   6  -3   1   10.00    0.70
  -6  -3  -1   11.40    0.70
   6  -3   1   10.60    0.60
   6  -3   1   10.50    0.80
   6  -3   1   10.60    0.70
   6   3   1   10.50    0.60
  -6   3  -1   11.60    0.70
   6   3   1   10.20    0.70
  -6   3  -1   10.70    0.80
  -6   3  -1   10.20    0.70
   6   3   1   11.50    0.80
   6   3   1    9.60    0.70
   6   3   1    9.80    0.60
   7  -3   1   88.99    3.20
   7  -3   1   86.09    2.90
  -7  -3  -1   82.59    2.90
  -7  -3  -1   89.19    3.10
  -7  -3  -1   85.19    2.90
   7  -3   1   84.09    2.90
   7  -3   1   84.49    3.00
   7  -3   1   89.19    3.00
  -7   3  -1   83.09    3.20
  -7   3  -1   85.89    2.90
   7   3   1   84.49    2.90
   7   3   1   87.09    3.10
   7   3   1   84.89    2.90
  -7   3  -1   86.39    2.90
   8  -3   1    5.20    0.60
   8  -3   1    4.90    0.60
   8  -3   1    5.70    0.60
   8  -3   1    6.20    0.70
  -8  -3  -1    5.50    0.60
  -8  -3  -1    6.40    0.60
   8  -3   1    5.60    0.50
  -8  -3  -1    5.40    0.60
   8   3   1    5.70    0.60
   8   3   1    6.80    0.70
  -8   3  -1    5.60    0.60
   8   3   1    5.50    0.60
   8   3   1    4.70    0.50
  -8   3  -1    5.70    0.70
  -8   3  -1    5.40    0.60
   9  -3   1    9.00    0.80
   9  -3   1   14.10    1.00
  -9  -3  -1   10.40    0.80
  -9  -3  -1    9.90    0.80
   9  -3   1   14.00    1.10
  -9  -3  -1   12.50    0.90
   9   3   1   12.50    1.00
   9   3   1   12.80    1.10
   9   3   1   10.50    0.90
   9   3   1   11.20    1.00
  -9   3  -1   10.40    0.80
   9   3   1   12.30    0.80
  -9   3  -1   13.20    0.90
  10  -3   1    1.00    0.60
 -10  -3  -1    1.20    0.50
  10  -3   1    1.20    0.60
  10  -3   1    1.30    0.70
 -10   3  -1    0.70    0.50
  10   3   1    1.30    0.60
 -10   3  -1    2.00    0.60
  10   3   1    1.10    0.60
  11  -3   1    3.20    0.70
 -11  -3  -1    2.30    0.60
  11  -3   1    2.20    0.70
  11   3   1    1.80    0.60
  11   3   1    2.30    0.70
 -11   3  -1    2.70    0.70
 -12  -3  -1    0.40    0.60
  12  -3   1    0.70    0.70
  12   3   1   -0.40    0.60
  12   3   1    0.90    0.60
 -12   3  -1    0.70    0.60
 -13  -3  -1    0.60    0.70
  13  -3   1    0.00    0.80
  13   3   1    0.10    0.70
 -13   3  -1   -0.10    0.60
  13   3   1    1.20    0.80
  14  -3   1   -0.20    0.90
 -14  -3  -1   -0.10    0.70
  14   3   1    1.30    0.80
  14   3   1    0.40    0.70
 -14   3  -1    1.10    0.70
  14  -4  -1   -1.00    0.60
 -14  -4   1   -0.20    0.70
  14   4  -1    0.20    0.80
 -14   4   1    1.30    0.70
  13  -4  -1    1.40    0.70
 -13  -4   1    2.90    0.70
 -13   4   1    2.20    0.70
  13   4  -1    1.00    0.80
 -12  -4   1   14.40    1.10
  12  -4  -1   15.20    1.40
  12  -4  -1   17.20    1.30
 -12   4   1   18.80    1.20
  12   4  -1   14.00    1.20
  12   4  -1   15.00    1.20
 -12   4   1   16.90    1.20
  11  -4  -1    7.60    1.00
  11  -4  -1    5.40    0.80
 -11  -4   1    7.20    0.80
 -11   4   1    8.30    0.90
 -11   4   1    5.90    0.70
  11   4  -1    6.20    0.80
  11   4  -1    7.60    0.90
  10  -4  -1    5.60    0.80
  10  -4  -1    6.10    0.80
 -10  -4   1    4.40    0.70
 -10  -4   1    4.90    0.70
  10  -4  -1    5.20    0.80
  10   4  -1    4.80    0.80
 -10   4   1    3.80    0.70
 -10   4   1    4.20    0.60
  10   4  -1    4.10    0.70
  10   4  -1    4.20    0.70
   9  -4  -1   41.60    1.80
   9  -4  -1   43.70    2.00
  -9  -4   1   42.70    1.80
  -9  -4   1   41.90    1.70
  -9  -4   1   41.50    1.60
   9  -4  -1   39.20    1.80
   9   4  -1   41.30    2.00
   9   4  -1   40.00    1.80
   9   4  -1   40.30    1.80
   9   4  -1   42.60    1.90
  -9   4   1   41.40    1.80
  -9   4   1   40.30    1.70
  -8  -4   1   77.39    2.70
   8  -4  -1   75.99    2.60
   8  -4  -1   80.69    3.00
   8  -4  -1   81.49    2.70
  -8  -4   1   75.39    2.70
  -8   4   1   79.49    2.60
   8   4  -1   64.39    2.70
   8   4  -1   75.89    2.70
  -8   4   1   75.69    2.70
   8   4  -1   76.69    2.70
  -8   4   1   76.19    2.90
   8   4  -1   77.99    3.00
  -7  -4   1   24.00    1.10
   7  -4  -1   23.00    0.90
   7  -4  -1   23.20    1.20
   7  -4  -1   24.10    1.10
  -7  -4   1   22.90    1.10
   7  -4  -1   26.10    1.10
  -7   4   1   24.10    1.10
   7   4  -1   22.40    1.10
   7   4  -1   25.30    1.30
   7   4  -1   24.20    1.10
   7   4  -1   24.50    1.10
  -7   4   1   25.10    1.10
  -7   4   1   26.10    1.20
  -6  -4   1   42.70    1.60
   6  -4  -1   45.40    1.60
  -6  -4   1   45.10    1.60
   6  -4  -1   43.30    1.60
  -6  -4   1   50.79    1.70
   6  -4  -1   41.60    1.60
   6  -4  -1   44.60    1.80
   6  -4  -1   43.00    1.60
   6  -4  -1   38.70    1.60
  -6   4   1   46.50    1.60
   6   4  -1   43.60    1.60
   6   4  -1   45.70    1.70
  -6   4   1   41.80    1.60
  -6   4   1   44.80    1.80
   6   4  -1   45.60    1.60
   5  -4  -1   22.70    1.10
  -5  -4   1   29.20    1.10
  -5  -4   1   31.40    1.10
   5  -4  -1   29.20    1.10
   5  -4  -1   30.80    1.10
  -5  -4   1   29.20    1.10
   5  -4  -1   28.70    1.10
   5  -4  -1   29.80    1.20
  -5   4   1   28.50    1.10
  -5   4   1   31.10    1.20
   5   4  -1   28.80    1.10
   5   4  -1   29.10    1.30
  -5   4   1   28.40    1.10
   5   4  -1   27.80    1.20
   5   4  -1   30.10    1.10
   4  -4  -1   97.09    3.20
   4  -4  -1   91.79    3.00
  -4  -4   1   95.29    3.00
  -4  -4   1   91.79    3.00
   4  -4  -1   95.99    3.00
  -4  -4   1   98.59    3.20
  -4   4   1   96.39    3.30
   4   4  -1   94.49    3.00
   4   4  -1   93.39    3.00
  -4   4   1   93.89    3.00
   4   4  -1   90.99    3.00
   4   4  -1   95.09    3.10
   4   4  -1   93.89    3.30
  -4   4   1   97.59    3.00
  -4   4   1   92.59    3.00
  -3  -4   1  802.82   24.80
   3  -4  -1  836.52   24.80
   3  -4  -1  837.32   24.30
   3  -4  -1  858.41   26.70
  -3  -4   1  828.42   26.70
  -3  -4   1  811.52   24.30
   3  -4  -1  812.52   26.50
  -3   4   1  804.42   24.30
  -3   4   1  785.32   24.80
   3   4  -1  793.52   26.60
   3   4  -1  813.62   24.80
  -3   4   1  829.12   26.50
   3   4  -1  834.92   24.80
  -3   4   1  834.52   24.30
   3   4  -1  831.42   24.90
   3   4  -1  798.82   24.30
  -2  -4   1   12.90    0.50
   2  -4  -1   13.30    0.50
   2  -4  -1   13.30    0.50
   2  -4  -1   12.10    0.60
   2  -4  -1   13.20    0.50
  -2  -4   1   12.90    0.60
  -2  -4   1   12.10    0.50
   2   4  -1   12.40    0.50
  -2   4   1   12.60    0.50
  -2   4   1   13.20    0.50
  -2   4   1   12.90    0.50
   2   4  -1   13.30    0.60
  -2   4   1   10.10    0.50
   2   4  -1   12.40    0.50
   2   4  -1   12.90    0.50
  -1  -4   1    6.60    0.30
  -1  -4   1    6.50    0.30
   1  -4  -1    6.50    0.30
  -1  -4   1    6.30    0.40
   1  -4  -1    6.80    0.30
   1  -4  -1    6.80    0.30
  -1   4   1    6.60    0.30
  -1   4   1    7.00    0.30
   1   4  -1    6.60    0.30
   1   4  -1    6.60    0.40
   1   4  -1    5.80    0.40
  -1   4   1    6.20    0.30
   1   4  -1    7.30    0.30
  -1   4   1    6.80    0.30
   0  -4  -1   18.30    0.70
   0  -4   1   16.90    0.60
   0  -4  -1   17.10    0.60
   0  -4  -1   17.70    0.60
   0  -4   1   17.10    0.60
   0   4   1   17.30    0.60
   0   4   1   16.00    0.60
   0   4  -1   16.80    0.70
   0   4  -1   17.50    0.60
   0   4   1   17.60    0.60
   0   4   1   16.20    0.50
   0   4   1   15.40    0.60
   0   4  -1   17.10    0.60
   0   4  -1   16.50    0.60
   1  -4   1 4552.14  138.79
   1  -4   1 4829.12  149.69
   1  -4   1 4722.73  139.19
   1  -4   1 4639.64  145.29
   1  -4   1 4519.75  140.59
   1  -4   1 4425.26  135.99
  -1  -4  -1 4462.85  138.59
  -1  -4  -1 4635.44  135.89
   1   4   1 4523.25  143.59
   1   4   1 4609.34  149.79
  -1   4  -1 4573.04  138.79
  -1   4  -1 4746.02  139.09
  -1   4  -1 4758.32  148.39
   1   4   1 4533.75  138.69
  -1   4  -1 4467.85  135.99
  -1   4  -1 4431.96  148.49
   1   4   1 4683.73  135.89
   2  -4   1   66.99    2.10
  -2  -4  -1   66.59    2.10
  -2  -4  -1   68.19    2.10
   2  -4   1   66.79    2.10
   2  -4   1   68.49    2.20
   2  -4   1   66.29    2.20
   2  -4   1   67.39    2.10
   2  -4   1   67.69    2.30
  -2  -4  -1   67.19    2.30
  -2   4  -1   67.19    2.30
  -2   4  -1   67.79    2.10
   2   4   1   71.09    2.10
   2   4   1   64.69    2.10
   2   4   1   63.39    2.30
   2   4   1   64.69    2.30
   2   4   1   66.99    2.10
  -2   4  -1   64.99    2.10
  -3  -4  -1   17.50    0.70
   3  -4   1   17.50    0.80
  -3  -4  -1   17.80    0.70
   3  -4   1   17.10    0.70
  -3  -4  -1   16.80    0.70
   3  -4   1   17.00    0.70
   3  -4   1   15.80    0.70
   3  -4   1   16.40    0.70
   3  -4   1   17.00    0.60
   3  -4   1   17.00    0.70
  -3   4  -1   17.00    0.70
  -3   4  -1   16.90    0.80
   3   4   1   16.20    0.70
   3   4   1   17.50    0.70
  -3   4  -1   18.30    0.70
   3   4   1   17.70    0.80
   3   4   1   16.20    0.70
   4  -4   1  212.48    6.60
   4  -4   1  206.38    7.00
  -4  -4  -1  206.58    6.40
   4  -4   1  208.48    6.50
   4  -4   1  207.88    6.40
  -4  -4  -1  214.08    6.50
  -4  -4  -1  217.98    7.00
   4  -4   1  212.28    7.00
  -4   4  -1  203.08    6.50
   4   4   1  208.08    6.50
   4   4   1  213.48    7.00
  -4   4  -1  214.38    6.40
   4   4   1  208.68    6.40
  -4   4  -1  216.38    7.00
   4   4   1  215.78    7.00
   5  -4   1   36.30    1.40
  -5  -4  -1   33.70    1.30
  -5  -4  -1   35.50    1.30
   5  -4   1   35.10    1.40
   5  -4   1   36.30    1.30
   5  -4   1   37.90    1.30
   5   4   1   35.40    1.40
   5   4   1   34.30    1.40
  -5   4  -1   36.20    1.40
  -5   4  -1   37.60    1.50
   5   4   1   37.50    1.50
   5   4   1   35.30    1.30
  -5   4  -1   35.60    1.30
  -6  -4  -1    0.80    0.30
  -6  -4  -1    0.70    0.30
   6  -4   1    1.00    0.40
   6  -4   1    1.20    0.30
   6  -4   1    0.60    0.40
   6  -4   1    0.50    0.30
   6  -4   1    0.40    0.30
   6  -4   1    0.80    0.30
  -6  -4  -1    0.90    0.30
   6   4   1    1.00    0.30
  -6   4  -1    0.10    0.30
  -6   4  -1    0.70    0.30
   6   4   1    0.30    0.20
  -6   4  -1    0.70    0.40
   6   4   1    0.60    0.30
   6   4   1    0.90    0.40
   6   4   1    1.10    0.30
  -7  -4  -1   -0.10    0.30
   7  -4   1    0.00    0.40
   7  -4   1    0.40    0.30
  -7  -4  -1   -0.20    0.30
   7  -4   1    0.10    0.30
   7  -4   1   -0.10    0.30
  -7  -4  -1    0.30    0.30
   7  -4   1   -0.10    0.30
  -7   4  -1   -0.20    0.30
   7   4   1    0.20    0.10
   7   4   1    0.20    0.30
   7   4   1   -0.10    0.30
   7   4   1   -0.20    0.30
   7   4   1    0.00    0.30
  -7   4  -1    0.20    0.40
  -7   4  -1    0.10    0.30
   8  -4   1    5.60    0.60
  -8  -4  -1    4.70    0.60
  -8  -4  -1    4.90    0.50
   8  -4   1    5.50    0.60
   8  -4   1    5.60    0.60
   8  -4   1    5.90    0.50
   8  -4   1    6.70    0.70
  -8  -4  -1    6.40    0.60
  -8   4  -1    5.50    0.60
   8   4   1    5.20    0.60
   8   4   1    6.10    0.70
   8   4   1    5.40    0.50
  -8   4  -1    5.10    0.60
   8   4   1    6.40    0.60
  -8   4  -1    5.10    0.60
   9  -4   1  131.29    4.60
   9  -4   1  126.39    4.10
  -9  -4  -1  122.69    4.30
   9  -4   1  123.39    4.30
  -9  -4  -1  123.49    4.10
  -9  -4  -1  124.19    4.20
   9   4   1  118.69    4.20
   9   4   1  122.79    4.20
   9   4   1  125.29    4.60
  -9   4  -1  120.09    4.20
  -9   4  -1  118.99    4.10
   9   4   1  120.99    4.10
  10  -4   1    9.20    0.90
  10  -4   1   10.50    0.90
 -10  -4  -1    9.70    0.90
  10  -4   1    9.80    1.00
  10   4   1   10.80    0.90
 -10   4  -1   10.60    0.90
  10   4   1    9.40    0.90
 -10   4  -1   10.20    0.90
  11  -4   1    1.00    0.60
  11  -4   1    1.00    0.60
 -11  -4  -1    1.00    0.60
  11   4   1    0.40    0.50
  11   4   1    1.00    0.60
 -11   4  -1    2.00    0.60
  12  -4   1    0.40    0.60
 -12  -4  -1    0.40    0.60
 -12   4  -1   -0.20    0.60
  12   4   1    0.40    0.70
  12   4   1    1.10    0.60
  13  -4   1    6.00    1.00
 -13  -4  -1    5.70    0.90
  13   4   1    4.60    1.00
  13   4   1    4.60    0.90
 -13   4  -1    6.10    0.90
 -14  -4  -1    0.30    0.70
  14  -4   1    0.90    0.90
  14   4   1    1.90    0.80
 -14   4  -1    0.70    0.70
  14   4   1    1.30    0.90
  14  -5  -1    0.70    0.80
 -14  -5   1    1.50    0.80
  14   5  -1    1.90    0.90
 -14   5   1    0.90    0.70
  13  -5  -1    1.70    0.70
 -13  -5   1    0.60    0.60
  13   5  -1    0.80    0.80
 -13   5   1    1.20    0.60
  12  -5  -1    8.70    1.10
  12  -5  -1    7.40    1.00
 -12  -5   1    6.50    0.80
 -12   5   1    6.90    0.90
 -12   5   1    7.40    0.80
  12   5  -1    7.90    0.90
  12   5  -1    6.00    0.90
  11  -5  -1    2.40    0.60
  11  -5  -1    3.20    0.80
 -11  -5   1    2.80    0.60
  11   5  -1    3.10    0.70
 -11   5   1    2.70    0.60
 -11   5   1    3.60    0.70
  11   5  -1    3.60    0.80
  10  -5  -1    7.70    0.80
 -10  -5   1    8.40    0.80
  10  -5  -1    8.50    0.90
 -10  -5   1    8.70    0.80
 -10   5   1    7.90    0.80
  10   5  -1    8.80    1.00
  10   5  -1    8.50    0.90
  10   5  -1    8.80    0.90
 -10   5   1    8.60    0.80
   9  -5  -1   25.20    1.40
   9  -5  -1   25.20    1.50
   9  -5  -1   24.90    1.30
  -9  -5   1   26.00    1.30
  -9  -5   1   26.10    1.20
  -9  -5   1   24.30    1.30
   9   5  -1   25.00    1.30
   9   5  -1   24.50    1.30
  -9   5   1   29.20    1.30
  -9   5   1   26.70    1.30
   9   5  -1   24.20    1.30
   9   5  -1   25.40    1.40
   9   5  -1   28.90    1.60
   8  -5  -1   52.69    2.20
   8  -5  -1   54.09    1.90
   8  -5  -1   54.99    2.00
  -8  -5   1   56.59    2.00
  -8  -5   1   55.59    2.10
  -8  -5   1   54.49    2.00
   8   5  -1   54.29    2.10
  -8   5   1   54.09    2.00
   8   5  -1   51.59    2.00
   8   5  -1   53.49    2.10
   8   5  -1   56.19    2.30
  -8   5   1   52.89    2.00
   8   5  -1   54.09    2.00
  -7  -5   1    0.90    0.40
   7  -5  -1    1.60    0.40
   7  -5  -1    0.60    0.40
   7  -5  -1    0.50    0.40
   7  -5  -1    1.20    0.20
   7  -5  -1    1.20    0.30
  -7  -5   1    0.10    0.20
   7  -5  -1    0.90    0.40
  -7  -5   1    0.80    0.40
   7   5  -1    0.40    0.40
  -7   5   1    0.40    0.40
   7   5  -1    1.00    0.40
   7   5  -1    0.80    0.40
   7   5  -1    1.30    0.40
  -7   5   1    1.20    0.40
  -7   5   1    1.10    0.40
  -6  -5   1    3.00    0.30
   6  -5  -1    3.40    0.40
  -6  -5   1    3.40    0.40
   6  -5  -1    4.30    0.50
  -6  -5   1    3.90    0.40
   6  -5  -1    3.50    0.40
   6  -5  -1    4.00    0.30
   6  -5  -1    3.70    0.40
   6   5  -1    3.50    0.40
   6   5  -1    3.80    0.50
  -6   5   1    4.50    0.50
  -6   5   1    4.50    0.40
   6   5  -1    3.80    0.40
  -6   5   1    3.70    0.40
  -5  -5   1    6.80    0.50
   5  -5  -1    7.00    0.60
  -5  -5   1    6.40    0.50
   5  -5  -1    7.50    0.50
   5  -5  -1    7.80    0.40
  -5  -5   1    7.60    0.50
   5  -5  -1    6.90    0.60
   5  -5  -1    7.80    0.50
  -5   5   1    7.60    0.50
   5   5  -1    7.00    0.60
   5   5  -1    6.00    0.50
   5   5  -1    8.10    0.50
   5   5  -1    8.10    0.70
  -5   5   1    7.80    0.60
  -5   5   1    6.80    0.50
   5   5  -1    6.90    0.60
  -4  -5   1   28.40    1.10
  -4  -5   1   27.90    1.10
   4  -5  -1   28.00    1.00
   4  -5  -1   28.90    1.00
  -4  -5   1   29.40    1.10
   4  -5  -1   27.90    1.00
   4   5  -1   28.10    1.10
  -4   5   1   28.20    1.00
  -4   5   1   29.20    1.20
  -4   5   1   27.30    1.10
   4   5  -1   27.00    1.10
   4   5  -1   28.10    1.10
   4   5  -1   28.20    1.10
  -4   5   1   28.60    1.00
   4   5  -1   29.50    1.20
   3  -5  -1  641.34   18.30
  -3  -5   1  626.04   20.10
  -3  -5   1  593.14   18.30
   3  -5  -1  618.24   18.70
  -3  -5   1  605.94   18.70
   3  -5  -1  598.64   20.00
   3  -5  -1  640.74   20.10
  -3   5   1  642.24   18.70
   3   5  -1  593.64   18.30
   3   5  -1  603.64   18.70
   3   5  -1  626.04   20.00
  -3   5   1  633.04   18.90
  -3   5   1  596.04   18.70
  -3   5   1  608.34   18.30
   3   5  -1  613.24   18.80
   3   5  -1  605.84   18.70
  -3   5   1  628.14   18.30
   2  -5  -1   65.29    2.10
   2  -5  -1   61.29    2.00
   2  -5  -1   62.89    2.00
  -2  -5   1   62.39    2.00
   2  -5  -1   63.29    2.20
  -2  -5   1   61.79    2.20
  -2  -5   1   63.89    2.00
  -2   5   1   63.09    1.90
   2   5  -1   63.79    2.20
   2   5  -1   63.09    2.00
  -2   5   1   61.29    2.00
  -2   5   1   62.19    2.00
  -2   5   1   62.29    2.00
   2   5  -1   60.79    2.00
   2   5  -1   60.79    2.00
  -1  -5   1  907.51   30.10
  -1  -5   1  942.31   28.00
   1  -5  -1  949.60   30.10
   1  -5  -1  942.41   29.80
  -1  -5   1  924.51   27.40
   1  -5  -1  939.61   27.40
  -1   5   1  953.80   27.40
  -1   5   1  933.71   28.30
  -1   5   1  876.91   28.00
   1   5  -1  925.51   27.90
   1   5  -1  946.31   29.90
   1   5  -1  938.21   28.00
  -1   5   1  841.22   27.30
  -1   5   1  931.31   27.90
   1   5  -1  898.61   27.30
   0  -5  -1  295.87    9.70
   0  -5  -1  301.77    8.80
   0  -5   1  282.37    9.70
   0  -5   1  295.17    8.80
   0  -5  -1  303.57    9.60
   0  -5   1  292.57    9.00
   0   5  -1  308.67    9.00
   0   5  -1  305.77    9.60
   0   5   1  303.87    8.80
   0   5  -1  296.17    9.60
   0   5   1  273.77    8.80
   0   5  -1  290.87    9.00
   0   5  -1  289.47    8.80
   0   5   1  300.37    9.00
   1  -5   1  226.78    7.20
  -1  -5  -1  235.58    7.00
   1  -5   1  241.08    7.30
   1  -5   1  234.68    7.10
   1  -5   1  226.38    7.70
   1  -5   1  233.98    7.00
  -1  -5  -1  235.98    7.60
   1  -5   1  230.38    7.10
  -1  -5  -1  234.68    7.10
  -1   5  -1  238.88    7.10
   1   5   1  244.68    7.00
  -1   5  -1  238.78    7.60
   1   5   1  224.98    7.10
  -1   5  -1  230.78    7.60
  -1   5  -1  224.68    7.00
  -1   5  -1  229.98    7.10
   1   5   1  231.38    7.10
   2  -5   1  257.17    7.90
   2  -5   1  254.67    8.00
  -2  -5  -1  253.87    8.50
   2  -5   1  262.27    8.00
   2  -5   1  260.67    8.50
  -2  -5  -1  253.77    7.70
   2  -5   1  261.67    7.70
   2  -5   1  257.97    7.90
  -2  -5  -1  260.17    7.80
   2   5   1  253.57    7.70
  -2   5  -1  258.07    8.40
  -2   5  -1  253.27    7.90
  -2   5  -1  252.37    7.70
   2   5   1  261.47    7.70
   2   5   1  250.77    7.80
   2   5   1  257.87    8.40
   3  -5   1  132.49    4.10
  -3  -5  -1  134.19    4.10
   3  -5   1  133.49    4.50
   3  -5   1  135.29    4.40
  -3  -5  -1  134.29    4.10
   3  -5   1  134.09    4.20
  -3  -5  -1  132.39    4.50
   3  -5   1  129.99    4.10
   3  -5   1  134.09    4.20
   3  -5   1  135.99    4.20
   3   5   1  129.99    4.50
  -3   5  -1  128.19    4.10
  -3   5  -1  131.69    4.10
   3   5   1  127.29    4.10
  -3   5  -1  135.09    4.50
   3   5   1  133.89    4.50
   3   5   1  129.89    4.10
  -4  -5  -1    3.90    0.40
  -4  -5  -1    4.10    0.40
   4  -5   1    4.80    0.40
  -4  -5  -1    3.40    0.30
   4  -5   1    4.10    0.30
   4  -5   1    4.00    0.40
   4  -5   1    4.00    0.40
   4  -5   1    3.20    0.30
  -4   5  -1    4.10    0.40
  -4   5  -1    3.40    0.40
   4   5   1    3.80    0.40
   4   5   1    4.10    0.40
  -4   5  -1    4.20    0.40
   4   5   1    3.90    0.40
   4   5   1    3.90    0.40
   5  -5   1  206.18    6.40
   5  -5   1  207.98    6.80
   5  -5   1  195.08    6.20
   5  -5   1  201.98    6.30
  -5  -5  -1  201.98    6.20
  -5  -5  -1  204.28    6.40
   5   5   1  212.28    6.90
   5   5   1  201.58    6.40
   5   5   1  201.58    6.80
   5   5   1  196.88    6.20
  -5   5  -1  215.68    6.80
  -5   5  -1  196.18    6.30
  -5   5  -1  199.48    6.20
  -6  -5  -1   71.09    2.50
  -6  -5  -1   75.79    2.50
   6  -5   1   72.49    2.60
   6  -5   1   74.79    2.60
   6  -5   1   71.79    2.70
   6  -5   1   75.89    2.50
   6  -5   1   73.09    2.50
  -6  -5  -1   72.09    2.70
  -6   5  -1   74.29    2.50
   6   5   1   73.29    2.50
  -6   5  -1   72.79    2.70
   6   5   1   73.79    2.60
   6   5   1   73.09    2.70
  -6   5  -1   74.69    2.50
   6   5   1   71.09    2.50
  -7  -5  -1    6.90    0.60
   7  -5   1    5.80    0.60
  -7  -5  -1    5.30    0.50
   7  -5   1    6.10    0.70
   7  -5   1    6.90    0.60
   7  -5   1    5.60    0.60
   7  -5   1    5.90    0.50
  -7  -5  -1    5.20    0.50
   7  -5   1    6.40    0.60
  -7   5  -1    6.20    0.60
  -7   5  -1    6.50    0.70
   7   5   1    7.00    0.70
   7   5   1    5.60    0.50
   7   5   1    5.90    0.60
  -7   5  -1    6.60    0.60
   7   5   1    6.00    0.60
   8  -5   1    9.80    0.80
  -8  -5  -1    9.80    0.80
   8  -5   1    9.00    0.60
   8  -5   1    8.60    0.80
  -8  -5  -1    9.00    0.70
   8  -5   1    8.10    0.70
   8  -5   1    9.90    0.70
  -8  -5  -1    9.90    0.70
  -8   5  -1    6.80    0.70
   8   5   1    6.90    0.70
   8   5   1    8.40    0.70
  -8   5  -1   10.20    0.80
  -8   5  -1   10.20    0.80
   8   5   1   10.10    0.80
   9  -5   1   53.29    2.20
  -9  -5  -1   51.39    2.10
  -9  -5  -1   53.89    2.10
  -9  -5  -1   53.69    2.10
   9  -5   1   51.09    2.10
   9  -5   1   52.29    2.30
   9   5   1   51.29    2.10
  -9   5  -1   54.19    2.10
   9   5   1   52.99    2.30
  -9   5  -1   49.40    2.00
   9   5   1   53.39    2.10
   9   5   1   51.69    2.10
  10  -5   1    8.30    0.80
  10  -5   1    7.40    0.90
 -10  -5  -1    8.10    0.80
  10  -5   1    9.20    1.00
 -10   5  -1    8.10    0.80
 -10   5  -1    8.40    0.80
  10   5   1    8.40    0.90
  10   5   1    7.00    0.80
  11  -5   1    6.00    0.90
  11  -5   1    6.90    0.90
 -11  -5  -1    6.10    0.80
  11  -5   1    8.50    1.00
 -11   5  -1    7.30    0.80
 -11   5  -1    6.70    0.80
  11   5   1    6.60    0.80
  11   5   1    7.00    0.80
  12  -5   1    1.60    0.70
 -12  -5  -1    1.30    0.60
 -12   5  -1    1.60    0.60
  12   5   1    1.40    0.70
  12   5   1    1.00    0.70
 -13  -5  -1    0.40    0.60
  13  -5   1   -0.50    0.70
  13   5   1   -1.30    0.70
  13   5   1    0.30    0.70
 -13   5  -1   -0.10    0.60
 -14  -5  -1    1.00    0.80
  14  -5   1   -1.10    0.80
  14   5   1    1.20    0.80
  14   5   1    1.20    0.80
 -14   5  -1    0.60    0.70
  14  -6  -1    0.80    0.90
 -14  -6   1   -1.00    0.70
 -14   6   1   -0.10    0.70
  14   6  -1   -0.20    0.80
  13  -6  -1    1.20    0.80
 -13  -6   1    0.10    0.60
 -13   6   1   -0.90    0.60
  13   6  -1   -0.20    0.70
  13   6  -1   -1.20    0.70
 -12  -6   1   -0.20    0.50
  12  -6  -1    0.30    0.70
  12  -6  -1   -0.80    0.60
  12   6  -1   -0.30    0.60
 -12   6   1   -0.80    0.50
  12   6  -1    0.00    0.70
 -12   6   1   -0.10    0.60
 -11  -6   1    5.70    0.80
  11  -6  -1    5.00    0.90
  11  -6  -1    5.90    0.90
 -11   6   1    5.40    0.70
 -11   6   1    7.10    0.80
  11   6  -1    4.30    0.80
  11   6  -1    6.90    0.80
 -10  -6   1   50.89    2.10
  10  -6  -1   50.29    2.20
  10  -6  -1   52.89    2.30
 -10   6   1   50.09    2.10
 -10   6   1   47.80    2.00
  10   6  -1   54.79    2.10
  10   6  -1   54.59    2.40
  10   6  -1   49.70    2.20
   9  -6  -1   64.59    2.70
   9  -6  -1   67.99    2.50
   9  -6  -1   65.19    2.50
  -9  -6   1   65.69    2.50
  -9  -6   1   66.29    2.40
  -9  -6   1   63.09    2.50
   9   6  -1   64.29    2.50
   9   6  -1   66.39    2.60
   9   6  -1   66.29    2.50
   9   6  -1   65.39    2.80
  -9   6   1   65.79    2.50
  -9   6   1   65.89    2.40
   9   6  -1   64.79    2.50
   8  -6  -1    0.40    0.40
   8  -6  -1    0.60    0.50
   8  -6  -1   -0.50    0.40
   8  -6  -1   -0.80    0.30
  -8  -6   1    0.30    0.40
  -8  -6   1    0.10    0.30
  -8  -6   1   -0.10    0.40
   8   6  -1    0.10    0.40
   8   6  -1    0.50    0.40
   8   6  -1    0.10    0.50
  -8   6   1    0.50    0.40
   8   6  -1    0.00    0.40
  -8   6   1    0.40    0.40
   8   6  -1   -0.20    0.40
  -7  -6   1   24.20    1.10
   7  -6  -1   24.50    1.00
   7  -6  -1   23.30    1.10
  -7  -6   1   25.50    1.10
   7  -6  -1   18.50    1.00
   7  -6  -1   24.30    1.20
   7  -6  -1   23.80    0.90
  -7  -6   1   23.60    1.10
   7  -6  -1   23.90    1.10
  -7   6   1   26.90    1.20
   7   6  -1   23.80    1.10
   7   6  -1   24.10    1.30
  -7   6   1   24.40    1.10
   7   6  -1   23.50    1.10
  -7   6   1   23.70    1.00
   7   6  -1   22.20    1.20
   7   6  -1   21.90    1.10
   6  -6  -1  103.69    3.40
   6  -6  -1  107.59    3.80
   6  -6  -1  109.39    3.50
   6  -6  -1  106.49    3.60
   6  -6  -1  108.89    3.60
  -6  -6   1  108.09    3.50
  -6  -6   1  106.19    3.40
   6   6  -1  105.39    3.50
  -6   6   1  107.99    3.50
  -6   6   1  103.69    3.40
   6   6  -1  104.49    3.50
  -6   6   1  109.89    3.80
   6   6  -1  104.79    3.50
   6   6  -1  103.29    3.50
   5  -6  -1   55.89    2.00
   5  -6  -1   55.19    2.10
   5  -6  -1   56.99    2.00
   5  -6  -1   58.29    2.00
   5  -6  -1   60.69    2.00
  -5  -6   1   55.79    2.00
  -5  -6   1   57.99    2.00
   5   6  -1   58.39    2.10
  -5   6   1   54.49    1.90
  -5   6   1   57.29    2.10
  -5   6   1   62.29    2.00
   5   6  -1   56.59    2.00
   5   6  -1   60.19    2.00
   5   6  -1   60.79    2.20
  -5   6   1   58.79    2.00
   5   6  -1   56.29    2.00
   4  -6  -1    5.90    0.50
   4  -6  -1    5.90    0.50
   4  -6  -1    6.40    0.40
  -4  -6   1    6.50    0.50
  -4  -6   1    6.40    0.40
  -4  -6   1    6.10    0.40
   4  -6  -1    6.30    0.40
   4  -6  -1    6.10    0.40
   4   6  -1    6.10    0.50
   4   6  -1    5.90    0.50
  -4   6   1    5.90    0.40
   4   6  -1    4.90    0.40
   4   6  -1    5.40    0.40
   4   6  -1    6.50    0.50
  -4   6   1    5.70    0.40
  -4   6   1    6.30    0.50
  -4   6   1    5.70    0.40
   3  -6  -1  234.58    7.20
   3  -6  -1  243.18    7.70
  -3  -6   1  222.78    7.20
  -3  -6   1  242.78    7.80
   3  -6  -1  236.98    7.00
  -3  -6   1  225.28    7.10
   3   6  -1  230.08    7.10
  -3   6   1  244.68    7.20
  -3   6   1  242.48    7.30
  -3   6   1  239.18    7.30
  -3   6   1  213.68    7.00
  -3   6   1  227.48    7.20
  -3   6   1  238.98    7.00
   3   6  -1  239.08    7.30
   3   6  -1  224.88    7.20
   3   6  -1  238.78    7.70
   2  -6  -1 1547.65   47.50
  -2  -6   1 1433.66   45.90
  -2  -6   1 1460.15   47.40
   2  -6  -1 1503.95   43.20
  -2  -6   1 1424.16   43.10
   2  -6  -1 1460.75   47.00
   2   6  -1 1399.26   43.00
  -2   6   1 1451.25   44.50
  -2   6   1 1519.15   43.20
  -2   6   1 1416.86   43.80
   2   6  -1 1420.66   47.00
   2   6  -1 1444.86   44.10
   2   6  -1 1446.06   44.00
  -2   6   1 1419.36   44.10
  -1  -6   1  676.13   20.20
   1  -6  -1  682.33   22.20
  -1  -6   1  645.44   22.20
   1  -6  -1  686.93   20.10
   1  -6  -1  680.73   22.00
  -1  -6   1  670.83   20.60
   1   6  -1  669.73   20.20
  -1   6   1  692.33   20.10
  -1   6   1  699.83   20.60
  -1   6   1  683.93   20.80
  -1   6   1  690.23   20.50
   1   6  -1  675.53   20.60
   1   6  -1  663.13   20.60
   1   6  -1  700.83   22.00
   0  -6   1   58.49    1.90
   0  -6   1   58.69    1.80
   0  -6  -1   58.99    1.80
   0  -6  -1   55.69    2.00
   0  -6   1   54.79    2.00
   0  -6  -1   57.49    2.00
   0   6  -1   55.39    1.90
   0   6   1   58.99    1.80
   0   6   1   59.59    1.90
   0   6   1   58.99    1.80
   0   6  -1   56.09    1.80
   0   6  -1   59.19    2.00
   0   6  -1   60.49    2.00
   0   6  -1   60.09    1.90
  -1  -6  -1   10.50    0.50
   1  -6   1   10.80    0.40
   1  -6   1   11.20    0.50
   1  -6   1   11.40    0.50
   1  -6   1   10.80    0.50
  -1  -6  -1   11.20    0.40
  -1  -6  -1   10.70    0.40
   1  -6   1   10.80    0.50
   1  -6   1   10.90    0.50
   1   6   1   11.00    0.40
   1   6   1   10.60    0.50
  -1   6  -1   10.70    0.50
   1   6   1   11.40    0.40
   1   6   1   10.70    0.40
  -1   6  -1   11.20    0.60
  -1   6  -1   10.50    0.50
  -1   6  -1   11.30    0.50
  -1   6  -1    9.70    0.50
   1   6   1   10.60    0.50
   2  -6   1  105.99    3.20
  -2  -6  -1  107.09    3.20
   2  -6   1  103.79    3.20
   2  -6   1  104.69    3.30
   2  -6   1  102.59    3.20
  -2  -6  -1  100.39    3.50
   2  -6   1  102.99    3.20
   2  -6   1  102.99    3.50
  -2  -6  -1  101.99    3.20
   2   6   1   94.39    3.30
   2   6   1  105.29    3.20
  -2   6  -1  105.19    3.20
   2   6   1  101.09    3.10
  -2   6  -1  100.39    3.20
  -2   6  -1  101.69    3.20
  -2   6  -1  101.59    3.50
   2   6   1  100.79    3.20
   2   6   1  103.49    3.50
   3  -6   1   61.99    1.90
   3  -6   1   59.89    2.10
   3  -6   1   59.99    2.00
   3  -6   1   59.79    2.00
  -3  -6  -1   60.99    2.00
   3  -6   1   57.89    2.00
  -3  -6  -1   57.89    2.10
   3  -6   1   59.49    2.10
  -3  -6  -1   60.19    2.00
  -3   6  -1   58.39    2.00
   3   6   1   65.29    2.20
  -3   6  -1   61.29    2.10
   3   6   1   58.29    1.90
  -3   6  -1   59.39    1.90
   3   6   1   58.09    2.00
  -4  -6  -1   -0.10    0.20
   4  -6   1    0.00    0.20
  -4  -6  -1    0.00    0.20
   4  -6   1    0.80    0.30
   4  -6   1    0.60    0.30
   4  -6   1    0.70    0.30
   4  -6   1    0.30    0.20
  -4  -6  -1    0.30    0.20
   4  -6   1    0.80    0.30
   4   6   1    0.20    0.20
   4   6   1    0.40    0.30
  -4   6  -1    0.30    0.20
  -4   6  -1    0.00    0.30
   4   6   1    0.30    0.30
  -4   6  -1    0.10    0.20
   4   6   1    0.20    0.20
   5  -6   1   22.50    1.00
   5  -6   1   25.00    1.10
   5  -6   1   23.80    1.00
   5  -6   1   25.60    1.00
  -5  -6  -1   22.50    1.00
   5  -6   1   24.30    1.00
  -5  -6  -1   24.20    1.10
  -5  -6  -1   24.10    1.00
   5   6   1   24.20    1.00
   5   6   1   22.60    1.00
   5   6   1   25.30    1.20
  -5   6  -1   26.40    1.10
  -5   6  -1   26.10    1.00
  -5   6  -1   23.40    1.00
   6  -6   1   30.80    1.30
   6  -6   1   31.00    1.30
  -6  -6  -1   30.50    1.30
  -6  -6  -1   31.20    1.30
   6  -6   1   30.50    1.30
   6  -6   1   31.40    1.30
  -6  -6  -1   33.40    1.30
   6  -6   1   33.30    1.40
  -6   6  -1   31.80    1.40
   6   6   1   31.60    1.40
  -6   6  -1   32.40    1.30
  -6   6  -1   32.10    1.30
   6   6   1   30.70    1.30
   6   6   1   30.80    1.30
   7  -6   1   64.19    2.30
   7  -6   1   66.09    2.40
  -7  -6  -1   67.79    2.50
   7  -6   1   65.29    2.60
   7  -6   1   70.99    2.40
  -7  -6  -1   67.89    2.40
   7  -6   1   65.49    2.40
   7  -6   1   66.89    2.40
  -7  -6  -1   65.39    2.40
   7   6   1   69.09    2.40
  -7   6  -1   63.99    2.30
  -7   6  -1   67.99    2.60
   7   6   1   67.39    2.60
   7   6   1   67.29    2.40
  -7   6  -1   66.89    2.40
  -8  -6  -1    0.40    0.40
   8  -6   1    0.50    0.50
   8  -6   1    0.00    0.40
  -8  -6  -1    0.20    0.30
   8  -6   1    0.40    0.30
   8  -6   1    0.80    0.40
   8  -6   1    0.30    0.40
  -8  -6  -1    0.30    0.40
   8   6   1    0.10    0.30
   8   6   1    0.10    0.40
  -8   6  -1    0.40    0.40
   8   6   1    0.90    0.40
  -8   6  -1    0.50    0.40
   8   6   1   -0.40    0.20
  -8   6  -1    0.40    0.40
   9  -6   1   -0.10    0.60
  -9  -6  -1    0.60    0.50
  -9  -6  -1    0.50    0.40
   9  -6   1    0.40    0.50
   9  -6   1   -0.30    0.50
   9   6   1    0.60    0.50
  -9   6  -1    0.20    0.50
   9   6   1    0.60    0.50
   9   6   1    0.90    0.50
  -9   6  -1    1.10    0.50
 -10  -6  -1    9.40    0.90
  10  -6   1   10.40    0.90
  10  -6   1   10.10    1.00
  10  -6   1    9.30    0.90
 -10   6  -1   10.40    0.90
  10   6   1    9.60    0.90
 -10   6  -1    9.50    0.80
  10   6   1    9.60    1.00
 -11  -6  -1    0.40    0.50
  11  -6   1    0.20    0.60
  11  -6   1   -0.60    0.60
  11   6   1    1.00    0.60
 -11   6  -1   -0.50    0.50
  11   6   1    0.10    0.60
 -11   6  -1   -0.50    0.50
  12  -6   1   -1.00    0.60
 -12  -6  -1    0.70    0.60
  12   6   1    0.30    0.70
 -12   6  -1    0.40    0.60
  12   6   1    0.00    0.60
  13  -6   1    0.30    0.70
 -13  -6  -1    0.40    0.70
  13   6   1   -0.40    0.60
 -13   6  -1    0.60    0.70
  13   6   1    0.60    0.70
  14  -6   1    3.40    1.00
 -14  -6  -1    2.20    0.80
 -14   6  -1    3.80    0.80
  14   6   1    4.00    0.90
  14   6   1    3.20    1.00
 -14  -7   1    0.60    0.70
  14  -7  -1   -0.10    0.70
 -14   7   1    0.00    0.60
  14   7  -1   -1.10    0.80
 -13  -7   1    0.60    0.60
  13  -7  -1    1.40    0.80
  13   7  -1   -0.40    0.60
 -13   7   1   -0.30    0.60
  13   7  -1   -0.20    0.80
 -12  -7   1    0.40    0.60
  12  -7  -1    0.90    0.70
  12  -7  -1   -1.10    0.60
 -12   7   1    0.80    0.60
 -12   7   1    0.50    0.50
  12   7  -1   -0.30    0.70
  12   7  -1    0.30    0.60
  11  -7  -1    0.00    0.60
  11  -7  -1    0.70    0.70
 -11  -7   1    0.40    0.50
  11   7  -1    1.40    0.60
  11   7  -1    0.70    0.70
 -11   7   1    2.20    0.60
 -11   7   1    0.90    0.50
  10  -7  -1    0.90    0.60
  10  -7  -1    3.50    0.70
 -10  -7   1    1.40    0.60
 -10   7   1    1.80    0.50
  10   7  -1    2.00    0.60
 -10   7   1    2.10    0.60
  10   7  -1    1.90    0.70
  -9  -7   1    0.30    0.50
  -9  -7   1    0.00    0.50
   9  -7  -1    0.80    0.60
   9  -7  -1    0.20    0.60
  -9  -7   1   -0.40    0.40
  -9   7   1    0.10    0.50
   9   7  -1   -0.30    0.50
  -9   7   1    0.40    0.40
   9   7  -1   -0.30    0.60
   9   7  -1    1.10    0.50
   9   7  -1   -0.10    0.50
   9   7  -1    0.20    0.60
   8  -7  -1   96.69    3.20
  -8  -7   1   99.59    3.30
   8  -7  -1   93.99    3.20
  -8  -7   1   94.89    3.40
   8  -7  -1   94.89    3.60
  -8  -7   1   95.09    3.20
   8  -7  -1   92.79    3.30
  -8   7   1   96.59    3.20
   8   7  -1   93.99    3.40
   8   7  -1   93.39    3.20
   8   7  -1   96.69    3.60
   8   7  -1   94.29    3.30
  -8   7   1   94.99    3.30
   8   7  -1   94.39    3.30
  -7  -7   1    3.10    0.50
   7  -7  -1    3.30    0.30
  -7  -7   1    2.90    0.40
  -7  -7   1    3.20    0.50
   7  -7  -1    3.60    0.50
   7  -7  -1    3.10    0.40
   7  -7  -1    3.10    0.50
   7  -7  -1    3.40    0.50
   7   7  -1    3.00    0.50
  -7   7   1    2.90    0.50
  -7   7   1    3.30    0.40
  -7   7   1    2.80    0.50
   7   7  -1    2.90    0.50
   7   7  -1    2.90    0.50
   7   7  -1    2.80    0.50
   7   7  -1    3.00    0.50
   6  -7  -1    0.40    0.20
   6  -7  -1   -0.10    0.30
   6  -7  -1    0.80    0.40
   6  -7  -1    0.30    0.30
  -6  -7   1    0.60    0.30
  -6  -7   1    0.00    0.30
  -6  -7   1    0.00    0.30
   6  -7  -1    0.20    0.20
  -6   7   1    0.40    0.30
   6   7  -1    0.50    0.30
   6   7  -1    0.60    0.30
  -6   7   1    0.50    0.30
   6   7  -1    0.60    0.30
   6   7  -1    0.40    0.30
   6   7  -1    0.50    0.40
  -6   7   1    0.30    0.30
   5  -7  -1    1.10    0.20
  -5  -7   1    0.70    0.30
  -5  -7   1    0.40    0.20
   5  -7  -1    1.00    0.30
  -5  -7   1    1.10    0.30
   5  -7  -1    0.70    0.30
   5  -7  -1    0.80    0.30
   5  -7  -1    1.20    0.30
  -5   7   1    0.80    0.30
   5   7  -1    0.90    0.40
   5   7  -1    1.40    0.30
   5   7  -1    1.10    0.30
   5   7  -1    0.70    0.30
  -5   7   1    1.10    0.30
  -5   7   1    1.00    0.30
   5   7  -1    1.00    0.40
  -5   7   1    1.00    0.30
  -4  -7   1   88.79    3.00
   4  -7  -1   89.59    3.20
   4  -7  -1   91.59    3.00
   4  -7  -1   94.39    2.90
   4  -7  -1   94.59    3.10
  -4  -7   1   91.39    2.90
   4  -7  -1   90.19    2.90
   4   7  -1   90.99    3.00
   4   7  -1   92.19    3.00
  -4   7   1   95.49    2.90
  -4   7   1   89.09    2.90
   4   7  -1   90.79    2.90
  -4   7   1   87.79    2.90
  -4   7   1   93.89    3.20
   4   7  -1   92.89    3.20
  -3  -7   1   20.20    0.80
   3  -7  -1   20.80    0.80
  -3  -7   1   21.40    0.90
  -3  -7   1   21.20    0.80
   3  -7  -1   20.60    0.80
   3  -7  -1   20.90    0.80
  -3   7   1   20.20    0.80
  -3   7   1   21.60    0.80
  -3   7   1   20.40    0.90
   3   7  -1   20.70    0.80
  -3   7   1   22.10    0.80
   3   7  -1   21.10    0.80
  -3   7   1   21.10    0.80
   3   7  -1   21.30    0.90
   3   7  -1   21.00    0.90
  -2  -7   1    4.90    0.40
  -2  -7   1    5.40    0.40
   2  -7  -1    5.90    0.40
  -2  -7   1    5.40    0.40
   2  -7  -1    5.40    0.40
   2  -7  -1    5.40    0.30
  -2   7   1    5.90    0.40
  -2   7   1    4.50    0.30
   2   7  -1    5.50    0.40
  -2   7   1    5.00    0.40
   2   7  -1    6.00    0.50
  -2   7   1    5.50    0.30
  -2   7   1    5.00    0.30
   2   7  -1    5.40    0.40
   2   7  -1    5.10    0.40
   1  -7  -1   64.99    2.30
  -1  -7   1   65.19    2.10
  -1  -7   1   63.69    2.10
   1  -7  -1   65.59    2.20
   1  -7  -1   65.39    2.00
  -1  -7   1   57.09    2.30
   1   7  -1   65.59    2.30
  -1   7   1   66.59    2.00
  -1   7   1   66.39    2.10
  -1   7   1   65.59    2.10
   1   7  -1   64.69    2.10
   1   7  -1   62.09    2.00
   1   7  -1   65.79    2.10
   1   7  -1   67.29    2.20
  -1   7   1   64.99    2.10
   0  -7   1  107.89    3.60
   0  -7  -1  105.59    3.20
   0  -7  -1  106.39    3.50
   0  -7  -1  101.29    3.60
   0  -7   1  105.69    3.30
   0  -7   1  108.19    3.30
   0   7   1  105.59    3.30
   0   7  -1  109.09    3.50
   0   7   1  108.69    3.20
   0   7  -1  102.49    3.30
   0   7   1  108.19    3.40
   0   7  -1  109.79    3.30
   0   7  -1  100.99    3.30
   0   7  -1  107.39    3.60
   1  -7   1    7.40    0.40
   1  -7   1    7.70    0.40
  -1  -7  -1    7.20    0.40
   1  -7   1    6.90    0.40
  -1  -7  -1    7.10    0.40
   1  -7   1    6.20    0.40
   1  -7   1    7.40    0.40
   1   7   1    7.40    0.40
   1   7   1    7.30    0.40
  -1   7  -1    7.10    0.40
  -1   7  -1    7.60    0.50
   1   7   1    7.50    0.40
   1   7   1    7.70    0.40
  -1   7  -1    7.40    0.40
   1   7   1    6.90    0.40
  -1   7  -1    7.30    0.40
   2  -7   1    0.00    0.20
  -2  -7  -1    0.00    0.20
   2  -7   1    0.10    0.20
  -2  -7  -1    0.00    0.20
   2  -7   1    0.10    0.20
   2  -7   1    0.10    0.20
  -2  -7  -1    0.00    0.20
   2  -7   1    0.10    0.10
   2  -7   1   -0.10    0.20
  -2   7  -1   -0.10    0.20
   2   7   1    0.00    0.20
   2   7   1    0.20    0.20
  -2   7  -1    0.10    0.20
   2   7   1   -0.10    0.20
   2   7   1    0.10    0.20
   2   7   1    0.00    0.20
  -2   7  -1    0.30    0.20
  -2   7  -1    0.50    0.20
  -3  -7  -1    0.20    0.20
   3  -7   1    0.40    0.20
  -3  -7  -1    0.30    0.20
   3  -7   1    0.40    0.20
   3  -7   1    0.20    0.20
   3  -7   1    0.50    0.20
  -3  -7  -1   -0.10    0.10
   3  -7   1    0.30    0.10
   3  -7   1   -0.20    0.10
   3   7   1   -0.10    0.20
  -3   7  -1    0.10    0.30
   3   7   1    0.20    0.20
   3   7   1    0.10    0.20
  -3   7  -1    0.40    0.20
  -3   7  -1    0.30    0.20
   3   7   1    0.40    0.20
   4  -7   1    0.90    0.30
   4  -7   1    1.70    0.30
  -4  -7  -1    1.30    0.30
  -4  -7  -1    1.10    0.30
   4  -7   1    1.90    0.30
   4  -7   1    1.50    0.20
   4  -7   1    1.40    0.30
  -4  -7  -1    2.40    0.30
   4  -7   1    2.00    0.30
   4   7   1    1.30    0.30
  -4   7  -1    1.60    0.30
   4   7   1    1.80    0.40
  -4   7  -1    2.00    0.40
  -4   7  -1    1.70    0.30
   4   7   1    1.60    0.30
   4   7   1    1.70    0.30
   5  -7   1    0.20    0.30
  -5  -7  -1    0.20    0.30
  -5  -7  -1   -0.20    0.20
   5  -7   1    0.40    0.30
   5  -7   1    0.10    0.20
   5  -7   1   -0.20    0.20
  -5  -7  -1    0.00    0.30
   5  -7   1    0.20    0.30
  -5   7  -1    0.40    0.30
   5   7   1    0.30    0.30
   5   7   1   -0.30    0.30
  -5   7  -1    0.60    0.30
   5   7   1    0.20    0.30
  -5   7  -1    0.30    0.30
   5   7   1   -0.10    0.30
   6  -7   1    6.10    0.50
   6  -7   1    5.80    0.60
   6  -7   1    6.90    0.60
  -6  -7  -1    6.30    0.50
  -6  -7  -1    6.10    0.50
   6  -7   1    6.30    0.50
  -6  -7  -1    7.00    0.60
   6  -7   1    7.30    0.60
  -6   7  -1    7.10    0.60
   6   7   1    7.10    0.60
   6   7   1    6.00    0.50
  -6   7  -1    7.70    0.60
   6   7   1    5.40    0.60
  -6   7  -1    7.00    0.50
   6   7   1    6.80    0.60
   7  -7   1   36.60    1.60
   7  -7   1   38.10    1.70
  -7  -7  -1   39.70    1.60
   7  -7   1   39.10    1.50
   7  -7   1   38.50    1.50
  -7  -7  -1   40.00    1.50
   7  -7   1   38.30    1.50
  -7  -7  -1   38.00    1.50
   7   7   1   39.10    1.70
   7   7   1   36.50    1.50
   7   7   1   38.30    1.60
  -7   7  -1   37.80    1.60
  -7   7  -1   39.60    1.50
  -7   7  -1   39.60    1.70
   8  -7   1    0.50    0.40
  -8  -7  -1    1.20    0.40
   8  -7   1    0.40    0.50
   8  -7   1    0.10    0.50
   8  -7   1    0.60    0.30
   8  -7   1    0.10    0.40
  -8  -7  -1    0.80    0.40
  -8  -7  -1    0.40    0.30
   8   7   1    0.00    0.20
   8   7   1    1.30    0.50
   8   7   1    0.30    0.40
  -8   7  -1    1.20    0.40
   8   7   1    0.60    0.40
  -8   7  -1    0.90    0.40
  -9  -7  -1   23.70    1.20
  -9  -7  -1   24.60    1.30
   9  -7   1   25.20    1.40
   9  -7   1   24.50    1.30
   9  -7   1   24.40    1.50
   9   7   1   26.30    1.30
   9   7   1   26.50    1.30
  -9   7  -1   22.00    1.30
   9   7   1   23.60    1.40
  -9   7  -1   24.30    1.30
  10  -7   1   25.00    1.60
  10  -7   1   24.20    1.40
  10  -7   1   23.80    1.40
 -10  -7  -1   24.00    1.40
  10   7   1   24.90    1.40
 -10   7  -1   26.10    1.30
  10   7   1   22.90    1.40
 -10   7  -1   25.30    1.40
  11  -7   1    0.40    0.70
  11  -7   1   -0.80    0.50
 -11  -7  -1   -0.70    0.50
  11   7   1   -0.60    0.50
 -11   7  -1   -0.30    0.50
 -11   7  -1   -0.40    0.50
  11   7   1   -0.50    0.60
 -12  -7  -1    1.20    0.60
  12  -7   1   -0.70    0.60
  12   7   1   -0.90    0.60
  12   7   1   -0.90    0.60
 -12   7  -1    0.00    0.60
 -13  -7  -1    0.30    0.70
  13  -7   1   -0.20    0.80
  13   7   1    0.30    0.80
  13   7   1    1.50    0.70
 -13   7  -1   -0.50    0.60
  14  -7   1    0.00    0.90
 -14  -7  -1   -1.50    0.70
  14   7   1    0.70    0.90
  14   7   1    0.10    0.80
 -14   7  -1    0.00    0.70
 -14  -8   1   -0.10    0.70
  14  -8  -1    1.10    0.90
  14   8  -1    0.30    0.90
 -14   8   1    1.30    0.70
 -13  -8   1   10.70    1.10
  13  -8  -1   10.40    1.20
 -13   8   1    9.50    1.00
  13   8  -1    9.00    1.20
  13   8  -1    9.60    1.10
  12  -8  -1    1.70    0.80
  12  -8  -1    1.60    0.70
 -12  -8   1    2.30    0.70
  12   8  -1    2.30    0.80
 -12   8   1    2.70    0.70
 -12   8   1    3.00    0.70
  12   8  -1    1.80    0.70
 -11  -8   1    2.00    0.60
  11  -8  -1    1.60    0.70
  11  -8  -1    0.90    0.60
  11   8  -1    1.20    0.60
 -11   8   1    1.30    0.50
  11   8  -1    0.10    0.60
 -11   8   1    1.40    0.60
  10  -8  -1    3.70    0.80
 -10  -8   1    4.10    0.70
  10  -8  -1    5.50    0.80
  10   8  -1    4.70    0.70
  10   8  -1    3.80    0.70
 -10   8   1    4.10    0.70
 -10   8   1    4.50    0.60
  -9  -8   1   46.10    1.90
  -9  -8   1   45.20    1.90
   9  -8  -1   48.10    2.10
  -9  -8   1   45.60    1.90
   9  -8  -1   45.40    2.00
   9   8  -1   43.00    1.90
  -9   8   1   46.50    1.90
   9   8  -1   48.20    2.00
   9   8  -1   47.00    2.20
   9   8  -1   46.80    1.90
   9   8  -1   46.90    1.90
  -9   8   1   47.20    1.80
  -8  -8   1    1.40    0.40
   8  -8  -1    0.90    0.50
   8  -8  -1    0.50    0.40
  -8  -8   1    0.50    0.40
  -8  -8   1    0.30    0.40
   8  -8  -1    0.40    0.50
   8   8  -1    0.80    0.50
  -8   8   1    1.00    0.40
   8   8  -1   -0.20    0.40
  -8   8   1    0.30    0.40
   8   8  -1    0.50    0.50
   8   8  -1    0.70    0.50
   8   8  -1    0.50    0.50
   7  -8  -1    7.40    0.70
   7  -8  -1    8.10    0.60
   7  -8  -1    8.30    0.70
  -7  -8   1    7.70    0.60
   7  -8  -1    8.10    0.50
  -7  -8   1    7.10    0.60
  -7  -8   1    7.20    0.60
   7   8  -1    7.30    0.70
   7   8  -1    8.30    0.70
  -7   8   1    7.20    0.70
   7   8  -1    6.80    0.70
  -7   8   1    7.90    0.60
  -7   8   1    6.80    0.60
   7   8  -1    6.70    0.60
   6  -8  -1  196.58    6.50
  -6  -8   1  206.58    6.50
  -6  -8   1  205.48    6.90
   6  -8  -1  208.58    6.40
   6  -8  -1  210.08    6.80
  -6  -8   1  205.58    6.40
   6  -8  -1  203.08    7.00
   6  -8  -1  199.88    6.40
  -6   8   1  203.18    6.50
   6   8  -1  209.08    6.50
  -6   8   1  202.48    6.30
   6   8  -1  211.48    7.00
   6   8  -1  202.78    6.40
  -6   8   1  216.78    6.30
   6   8  -1  201.78    6.50
  -6   8   1  207.78    6.90
   6   8  -1  203.58    6.60
   5  -8  -1   96.39    3.30
   5  -8  -1   97.09    3.10
   5  -8  -1   93.79    3.20
  -5  -8   1   99.29    3.20
  -5  -8   1   95.49    3.10
   5  -8  -1  101.19    3.10
  -5  -8   1   96.69    3.40
   5  -8  -1   91.39    3.40
  -5   8   1  100.09    3.10
   5   8  -1   95.99    3.20
   5   8  -1   92.89    3.20
   5   8  -1   95.89    3.10
  -5   8   1   93.79    3.10
  -5   8   1   96.09    3.10
  -5   8   1   98.59    3.40
   5   8  -1   93.59    3.40
   5   8  -1   94.59    3.20
   4  -8  -1   22.00    1.00
   4  -8  -1   22.10    0.90
  -4  -8   1   20.50    0.90
  -4  -8   1   21.30    0.90
   4  -8  -1   21.80    0.90
   4  -8  -1   22.20    1.00
   4  -8  -1   22.80    0.90
   4   8  -1   22.40    0.90
  -4   8   1   21.70    0.90
  -4   8   1   21.00    0.90
   4   8  -1   22.80    1.00
   4   8  -1   22.80    1.00
   4   8  -1   21.10    0.90
  -4   8   1   23.90    0.90
  -3  -8   1  254.07    8.20
   3  -8  -1  270.77    8.00
  -3  -8   1  269.67    8.00
   3  -8  -1  260.67    8.20
   3  -8  -1  262.57    8.80
   3   8  -1  269.27    8.80
   3   8  -1  255.97    8.00
  -3   8   1  273.97    8.30
  -3   8   1  266.07    8.20
  -3   8   1  273.97    8.20
   3   8  -1  264.27    8.20
   3   8  -1  266.47    8.20
  -3   8   1  275.67    8.00
  -3   8   1  256.37    8.10
   2  -8  -1   73.99    2.60
  -2  -8   1   76.99    2.40
  -2  -8   1   73.49    2.40
   2  -8  -1   74.99    2.30
   2  -8  -1   74.59    2.60
  -2   8   1   76.59    2.40
   2   8  -1   78.29    2.60
  -2   8   1   77.19    2.30
   2   8  -1   74.79    2.40
  -2   8   1   76.19    2.40
   2   8  -1   71.79    2.40
  -2   8   1   71.09    2.40
   2   8  -1   71.39    2.40
   1  -8  -1    1.10    0.20
   1  -8  -1    1.10    0.20
   1  -8  -1    1.10    0.20
  -1  -8   1    1.80    0.20
  -1  -8   1    1.20    0.20
   1   8  -1    1.20    0.20
  -1   8   1    1.00    0.20
   1   8  -1    1.20    0.20
  -1   8   1    1.30    0.20
   1   8  -1    1.40    0.30
   1   8  -1    1.20    0.20
  -1   8   1    1.00    0.20
   1   8  -1    0.90    0.20
  -1   8   1    1.20    0.20
   0  -8  -1  100.09    3.40
   0  -8   1   94.69    3.40
   0  -8  -1  101.49    3.40
   0  -8   1  100.89    3.10
   0  -8  -1  100.69    3.10
   0  -8   1  100.49    3.10
   0   8   1   99.99    3.10
   0   8   1  100.59    3.00
   0   8  -1   97.19    3.20
   0   8   1  100.09    3.20
   0   8  -1  102.29    3.40
   0   8  -1  103.69    3.20
   0   8  -1  103.49    3.30
   0   8  -1   97.49    3.10
   1  -8   1  326.27   10.00
  -1  -8  -1  328.57    9.70
   1  -8   1  330.77    9.70
   1  -8   1  332.77   10.20
   1  -8   1  328.77    9.90
  -1  -8  -1  329.07    9.90
   1  -8   1  305.67   10.70
   1   8   1  318.67    9.90
   1   8   1  329.17   10.00
  -1   8  -1  321.07   10.60
  -1   8  -1  313.27    9.90
  -1   8  -1  312.87    9.70
   1   8   1  325.07    9.90
  -1   8  -1  331.17    9.90
   1   8   1  338.47    9.70
   2  -8   1    0.90    0.20
  -2  -8  -1    0.70    0.20
   2  -8   1    0.50    0.20
   2  -8   1    0.70    0.20
   2  -8   1    1.00    0.20
   2  -8   1    0.80    0.20
  -2  -8  -1    0.20    0.20
   2  -8   1    0.80    0.20
  -2  -8  -1    0.90    0.20
  -2   8  -1    1.20    0.30
   2   8   1    0.70    0.20
  -2   8  -1    1.30    0.20
   2   8   1    1.00    0.20
   2   8   1    1.20    0.20
   2   8   1    0.60    0.20
   2   8   1    1.30    0.20
  -2   8  -1    0.90    0.20
  -2   8  -1    0.70    0.20
   2   8   1    0.90    0.20
  -3  -8  -1   80.69    2.50
   3  -8   1   77.99    2.80
   3  -8   1   82.39    2.60
   3  -8   1   82.39    2.60
  -3  -8  -1   80.69    2.60
   3  -8   1   78.39    2.50
   3  -8   1   80.09    2.50
   3   8   1   74.29    2.50
  -3   8  -1   84.19    2.60
   3   8   1   81.69    2.80
  -3   8  -1   76.99    2.60
   3   8   1   75.09    2.60
   3   8   1   74.49    2.60
  -3   8  -1   76.29    2.50
  -3   8  -1   81.39    2.80
   4  -8   1   96.79    3.10
  -4  -8  -1   96.89    3.10
  -4  -8  -1   97.59    3.10
   4  -8   1   91.29    3.30
   4  -8   1  100.59    3.00
  -4  -8  -1   93.29    3.40
   4  -8   1  102.39    3.10
   4  -8   1   93.29    3.10
   4  -8   1   96.29    3.30
   4  -8   1   92.39    3.10
   4   8   1   91.49    3.00
   4   8   1   93.29    3.10
   4   8   1   96.99    3.20
  -4   8  -1   96.09    3.40
  -4   8  -1   94.19    3.10
  -4   8  -1   95.09    3.00
   4   8   1   95.69    3.40
   5  -8   1   44.30    1.80
   5  -8   1   47.00    1.70
  -5  -8  -1   43.90    1.80
   5  -8   1   44.40    1.60
  -5  -8  -1   44.00    1.60
   5  -8   1   45.70    1.60
   5  -8   1   44.80    1.70
  -5  -8  -1   45.70    1.60
   5   8   1   44.20    1.70
   5   8   1   43.70    1.60
  -5   8  -1   43.30    1.60
   5   8   1   43.00    1.60
  -5   8  -1   47.90    1.80
   5   8   1   45.60    1.80
  -5   8  -1   45.80    1.60
   6  -8   1   21.20    1.00
  -6  -8  -1   20.10    0.90
   6  -8   1   19.50    1.00
   6  -8   1   21.00    1.00
  -6  -8  -1   20.00    1.00
   6  -8   1   20.20    0.90
   6  -8   1   21.30    1.10
  -6  -8  -1   19.00    1.00
   6   8   1   19.10    1.00
  -6   8  -1   20.20    0.90
   6   8   1   19.90    1.00
  -6   8  -1   20.70    1.10
   6   8   1   19.40    1.00
  -6   8  -1   20.50    1.00
   6   8   1   21.30    1.10
   7  -8   1    1.80    0.40
   7  -8   1    1.70    0.30
  -7  -8  -1    2.10    0.40
   7  -8   1    2.30    0.50
  -7  -8  -1    1.30    0.40
   7  -8   1    1.80    0.40
   7  -8   1    1.40    0.40
  -7  -8  -1    1.90    0.40
  -7   8  -1    1.80    0.40
   7   8   1    1.40    0.50
   7   8   1    1.70    0.40
  -7   8  -1    1.50    0.40
  -7   8  -1    1.70    0.40
   7   8   1    1.70    0.40
   8  -8   1   58.89    2.20
   8  -8   1   58.09    2.30
   8  -8   1   60.39    2.20
   8  -8   1   56.19    2.40
   8  -8   1   58.39    2.20
  -8  -8  -1   57.99    2.20
  -8  -8  -1   59.09    2.30
  -8  -8  -1   60.09    2.20
   8   8   1   58.69    2.20
   8   8   1   58.29    2.20
  -8   8  -1   57.69    2.20
   8   8   1   52.39    2.20
  -8   8  -1   55.69    2.10
  -9  -8  -1   19.00    1.10
   9  -8   1   16.60    1.30
   9  -8   1   18.00    1.20
  -9  -8  -1   17.60    1.00
   9  -8   1   19.20    1.20
   9  -8   1   18.50    1.20
   9   8   1   18.50    1.20
   9   8   1   16.90    1.20
  -9   8  -1   18.10    1.20
   9   8   1   17.50    1.10
  -9   8  -1   19.80    1.10
  10  -8   1    2.10    0.70
  10  -8   1    2.10    0.70
 -10  -8  -1    2.90    0.50
 -10  -8  -1    1.90    0.60
 -10   8  -1    1.90    0.60
  10   8   1    1.70    0.60
  10   8   1    1.30    0.70
 -10   8  -1    1.80    0.50
  11  -8   1    0.50    0.60
  11  -8   1    1.50    0.70
 -11  -8  -1    1.60    0.60
  11   8   1    2.30    0.70
  11   8   1    2.10    0.60
 -11   8  -1    1.60    0.60
 -11   8  -1    2.00    0.70
  12  -8   1   -0.30    0.70
 -12  -8  -1    0.40    0.60
  12   8   1   -0.30    0.60
  12   8   1    0.70    0.70
 -12   8  -1   -0.70    0.50
 -13  -8  -1   10.00    1.10
  13  -8   1    9.30    1.20
  13   8   1    8.00    1.10
 -13   8  -1   10.40    1.00
  13   8   1   10.50    1.10
  14  -8   1    0.10    0.80
 -14   8  -1   -0.60    0.70
  14   8   1   -0.20    0.80
  14   8   1    0.20    0.80
 -14  -9   1   -0.40    0.70
  14  -9  -1   -0.30    0.70
  14   9  -1    0.40    0.80
 -14   9   1    0.60    0.70
  14   9  -1   -0.40    0.90
  13  -9  -1    1.40    0.70
 -13  -9   1    0.60    0.70
  13   9  -1   -0.40    0.70
  13   9  -1   -0.30    0.80
 -13   9   1    0.50    0.60
  12  -9  -1    7.30    1.10
 -12  -9   1    8.00    0.90
  12  -9  -1    9.10    1.10
 -12   9   1    7.90    0.80
  12   9  -1    8.70    1.00
  12   9  -1    8.30    1.10
 -12   9   1    8.70    1.00
  11  -9  -1   19.20    1.50
  11  -9  -1   18.60    1.30
 -11  -9   1   18.90    1.30
 -11   9   1   19.90    1.30
  11   9  -1   21.90    1.40
 -11   9   1   19.50    1.20
  11   9  -1   18.40    1.30
  10  -9  -1    3.90    0.80
 -10  -9   1    2.80    0.60
  10  -9  -1    2.20    0.60
  10   9  -1    3.40    0.80
 -10   9   1    2.90    0.60
 -10   9   1    4.10    0.70
  10   9  -1    3.10    0.70
   9  -9  -1    0.90    0.60
   9  -9  -1    1.00    0.60
  -9  -9   1    1.00    0.50
  -9  -9   1    1.10    0.50
   9   9  -1    1.50    0.60
   9   9  -1    1.20    0.50
   9   9  -1    1.50    0.70
  -9   9   1    1.00    0.50
   9   9  -1    1.10    0.60
  -9   9   1    1.60    0.50
   9   9  -1    0.90    0.60
  -8  -9   1   28.60    1.30
   8  -9  -1   27.30    1.40
  -8  -9   1   26.60    1.30
  -8  -9   1   27.60    1.30
   8  -9  -1   27.80    1.40
   8  -9  -1   26.90    1.30
   8   9  -1   27.60    1.50
  -8   9   1   27.10    1.30
   8   9  -1   27.30    1.30
   8   9  -1   25.20    1.30
   8   9  -1   26.60    1.40
  -8   9   1   26.00    1.20
   8   9  -1   27.00    1.30
  -7  -9   1   22.90    1.10
   7  -9  -1   22.30    1.20
  -7  -9   1   25.10    1.20
   7  -9  -1   24.70    1.00
   7  -9  -1   22.20    1.20
  -7  -9   1   25.50    1.10
   7  -9  -1   23.20    1.10
   7   9  -1   24.60    1.20
   7   9  -1   23.20    1.10
   7   9  -1   23.70    1.10
  -7   9   1   24.00    1.10
   7   9  -1   23.60    1.20
  -7   9   1   25.20    1.10
   6  -9  -1   23.70    1.00
  -6  -9   1   23.30    1.10
  -6  -9   1   22.90    1.10
   6  -9  -1   21.40    0.90
  -6  -9   1   22.80    1.00
   6  -9  -1   23.90    1.00
   6  -9  -1   21.00    1.10
   6  -9  -1   22.70    1.10
   6   9  -1   21.30    1.20
   6   9  -1   23.70    1.10
   6   9  -1   22.10    1.10
   6   9  -1   23.00    1.10
  -6   9   1   21.60    1.00
  -6   9   1   22.40    1.00
  -6   9   1   21.60    1.10
  -6   9   1   23.80    1.00
  -5  -9   1  309.17    9.70
  -5  -9   1  303.27    9.50
   5  -9  -1  309.77   10.40
   5  -9  -1  323.37   10.40
   5  -9  -1  313.07    9.80
  -5  -9   1  319.37   10.50
   5  -9  -1  323.77    9.60
   5  -9  -1  313.17    9.50
   5   9  -1  322.47   10.40
   5   9  -1  309.57    9.50
   5   9  -1  307.07    9.70
  -5   9   1  307.67   10.40
  -5   9   1  310.97    9.50
  -5   9   1  310.47    9.70
  -5   9   1  325.97    9.50
   5   9  -1  307.67    9.80
   4  -9  -1  690.93   22.60
   4  -9  -1  716.63   21.00
  -4  -9   1  677.73   21.00
   4  -9  -1  714.13   20.60
   4  -9  -1  707.43   21.10
   4  -9  -1  688.43   22.50
  -4  -9   1  697.33   22.70
  -4  -9   1  683.93   20.60
   4   9  -1  665.33   22.50
  -4   9   1  662.13   21.10
  -4   9   1  718.03   20.60
   4   9  -1  689.33   21.00
  -4   9   1  686.13   20.50
  -4   9   1  673.33   21.00
   4   9  -1  702.23   21.10
   4   9  -1  678.63   20.60
  -3  -9   1   12.00    0.70
  -3  -9   1   11.00    0.60
  -3  -9   1   12.90    0.60
   3  -9  -1   12.10    0.60
   3  -9  -1   13.70    0.60
   3  -9  -1   13.30    0.60
   3   9  -1   13.20    0.70
  -3   9   1   13.40    0.60
  -3   9   1   14.10    0.60
  -3   9   1   13.80    0.70
   3   9  -1   12.40    0.70
  -3   9   1   13.70    0.60
   3   9  -1   11.70    0.60
  -3   9   1   12.90    0.60
   3   9  -1   12.80    0.70
   2  -9  -1    4.30    0.40
   2  -9  -1    3.70    0.30
  -2  -9   1    3.70    0.30
  -2  -9   1    3.80    0.30
   2  -9  -1    4.20    0.40
   2   9  -1    4.00    0.40
  -2   9   1    4.50    0.40
   2   9  -1    3.90    0.40
  -2   9   1    3.70    0.30
  -2   9   1    3.50    0.30
   2   9  -1    3.40    0.30
   2   9  -1    4.00    0.30
  -2   9   1    3.60    0.40
  -2   9   1    4.00    0.30
   1  -9  -1  188.38    5.60
   1  -9  -1  176.68    6.20
  -1  -9   1  187.58    5.80
   1  -9  -1  181.68    6.20
  -1  -9   1  185.88    5.70
   1   9  -1  192.68    6.10
   1   9  -1  192.18    5.80
   1   9  -1  188.68    6.20
  -1   9   1  185.78    5.80
  -1   9   1  191.78    5.60
  -1   9   1  188.68    5.80
  -1   9   1  189.78    5.70
   1   9  -1  179.58    5.60
   1   9  -1  179.88    5.80
   0  -9   1  176.88    5.40
   0  -9  -1  178.38    6.00
   0  -9   1  178.98    5.50
   0  -9  -1  177.88    5.90
   0  -9   1  173.48    6.00
   0  -9  -1  178.08    5.40
   0   9   1  178.38    5.50
   0   9  -1  176.48    5.90
   0   9  -1  184.18    5.50
   0   9  -1  169.18    5.40
   0   9  -1  180.58    5.80
   0   9   1  178.28    5.50
   0   9  -1  170.18    5.50
   0   9   1  183.08    5.30
  -1  -9  -1  176.88    5.50
   1  -9   1  177.58    5.50
   1  -9   1  175.78    6.00
   1  -9   1  174.48    5.60
  -1  -9  -1  180.78    5.40
   1  -9   1  180.78    5.70
   1  -9   1  178.88    5.50
  -1   9  -1  173.08    5.60
  -1   9  -1  179.68    6.00
   1   9   1  183.78    5.60
   1   9   1  186.18    5.50
   1   9   1  175.78    5.50
  -1   9  -1  172.58    5.40
   1   9   1  186.78    5.40
  -1   9  -1  188.08    5.60
   2  -9   1   97.59    3.00
   2  -9   1   95.29    3.10
   2  -9   1   96.49    3.00
  -2  -9  -1   95.49    3.00
  -2  -9  -1   94.39    3.00
   2  -9   1   94.19    3.30
   2  -9   1   93.39    3.00
   2   9   1   98.19    3.00
  -2   9  -1   97.49    3.10
   2   9   1   92.79    3.00
   2   9   1   95.39    3.10
  -2   9  -1   94.39    3.30
  -2   9  -1   91.69    3.00
   2   9   1   92.29    2.90
   2   9   1   95.29    3.30
  -2   9  -1   96.39    3.00
   2   9   1   94.19    3.00
  -3  -9  -1   44.60    1.50
   3  -9   1   44.40    1.40
  -3  -9  -1   44.80    1.50
   3  -9   1   43.20    1.50
   3  -9   1   42.20    1.50
   3  -9   1   43.00    1.60
   3  -9   1   44.40    1.50
  -3  -9  -1   41.60    1.60
   3  -9   1   42.60    1.50
   3   9   1   40.70    1.40
   3   9   1   40.90    1.50
   3   9   1   42.00    1.50
   3   9   1   42.90    1.60
  -3   9  -1   41.80    1.60
   3   9   1   40.30    1.50
  -3   9  -1   43.00    1.50
  -3   9  -1   42.00    1.50
  -3   9  -1   41.30    1.50
   4  -9   1    0.80    0.30
   4  -9   1    0.40    0.30
   4  -9   1    0.00    0.30
   4  -9   1    0.00    0.10
  -4  -9  -1    0.20    0.30
   4  -9   1    0.10    0.30
  -4  -9  -1    0.70    0.30
  -4  -9  -1    0.70    0.30
   4  -9   1    0.00    0.20
   4  -9   1    0.30    0.30
   4   9   1    0.40    0.30
   4   9   1    0.10    0.30
   4   9   1    0.50    0.30
  -4   9  -1    0.00    0.30
   4   9   1    0.20    0.30
  -4   9  -1    0.60    0.30
  -4   9  -1    0.30    0.30
   5  -9   1    0.60    0.30
  -5  -9  -1    0.20    0.30
   5  -9   1    0.40    0.30
  -5  -9  -1    0.60    0.30
   5  -9   1    0.50    0.30
   5  -9   1    0.30    0.30
   5  -9   1    0.30    0.30
  -5  -9  -1    0.40    0.30
   5   9   1    0.50    0.40
   5   9   1   -0.40    0.30
   5   9   1    0.20    0.30
  -5   9  -1    0.90    0.30
   5   9   1    0.20    0.30
  -5   9  -1    0.80    0.30
  -5   9  -1    0.30    0.30
  -6  -9  -1    0.80    0.30
   6  -9   1    1.10    0.40
  -6  -9  -1    0.10    0.30
   6  -9   1    0.40    0.40
   6  -9   1    0.70    0.30
   6  -9   1    1.10    0.30
   6  -9   1    1.30    0.40
  -6  -9  -1    0.30    0.30
   6   9   1    0.60    0.40
  -6   9  -1    0.10    0.40
   6   9   1    0.10    0.30
  -6   9  -1    0.80    0.30
   6   9   1    0.50    0.40
   6   9   1    0.40    0.40
  -6   9  -1    0.80    0.40
   7  -9   1    8.20    0.60
   7  -9   1    7.60    0.70
  -7  -9  -1    9.00    0.70
  -7  -9  -1    7.20    0.70
   7  -9   1    6.80    0.60
   7  -9   1    8.90    0.80
  -7  -9  -1    6.90    0.60
   7  -9   1    8.70    0.70
   7   9   1    8.00    0.80
  -7   9  -1    6.50    0.70
  -7   9  -1    7.60    0.70
  -7   9  -1    7.90    0.60
   7   9   1    8.00    0.70
   7   9   1    7.10    0.60
   8  -9   1    9.10    0.70
   8  -9   1    9.10    0.80
   8  -9   1   10.20    0.90
   8  -9   1    8.30    0.70
  -8  -9  -1    8.20    0.70
  -8  -9  -1    7.70    0.70
  -8   9  -1    8.60    0.70
  -8   9  -1    9.50    0.80
   8   9   1    7.80    0.80
   8   9   1    8.00    0.70
   8   9   1    7.70    0.80
   9  -9   1    5.40    0.70
   9  -9   1    4.10    0.80
  -9  -9  -1    6.50    0.70
  -9  -9  -1    5.70    0.60
   9  -9   1    5.90    0.70
   9  -9   1    5.40    0.70
   9   9   1    4.00    0.70
   9   9   1    5.40    0.70
  -9   9  -1    5.90    0.70
   9   9   1    5.30    0.70
  -9   9  -1    5.60    0.70
  10  -9   1    1.70    0.70
 -10  -9  -1    1.30    0.60
  10  -9   1    1.20    0.60
 -10  -9  -1    2.20    0.50
  10   9   1    2.00    0.60
  10   9   1    1.60    0.70
 -10   9  -1    1.90    0.60
 -10   9  -1    0.50    0.60
  10   9   1    1.40    0.60
 -11  -9  -1    2.00    0.60
  11  -9   1    0.80    0.70
  11  -9   1    0.20    0.70
 -11   9  -1    1.50    0.60
  11   9   1    1.90    0.70
  11   9   1    1.00    0.60
 -11   9  -1    1.40    0.60
 -12  -9  -1    0.20    0.60
  12  -9   1    0.80    0.60
  12   9   1   -0.70    0.60
 -12   9  -1   -0.60    0.60
  12   9   1   -0.30    0.60
  13  -9   1    0.30    0.80
  13   9   1   -0.10    0.70
 -13   9  -1    0.10    0.60
  13   9   1    1.20    0.80
  14  -9   1    5.50    1.10
  14   9   1    5.70    1.00
 -14   9  -1    5.70    0.90
  14   9   1    5.50    1.00
  14 -10  -1   -0.10    0.80
 -14 -10   1   -0.40    0.70
  14  10  -1    0.60    0.80
  14  10  -1   -1.00    0.90
 -14  10   1   -0.60    0.60
  13 -10  -1    1.30    0.80
 -13 -10   1    0.70    0.70
  13  10  -1    1.30    0.70
  13  10  -1    1.40    0.90
 -13  10   1    1.10    0.60
 -12 -10   1    2.80    0.70
  12 -10  -1    2.40    0.80
  12 -10  -1    3.10    0.70
 -12  10   1    3.40    0.70
  12  10  -1    1.90    0.70
  12  10  -1    1.50    0.80
 -12  10   1    1.50    0.70
  11 -10  -1    2.70    0.70
  11 -10  -1    3.60    0.90
 -11 -10   1    4.30    0.70
 -11  10   1    4.70    0.70
 -11  10   1    4.20    0.70
  11  10  -1    5.00    0.90
  11  10  -1    3.80    0.70
  10 -10  -1   -1.20    0.60
 -10 -10   1    0.20    0.50
  10 -10  -1    0.60    0.60
 -10  10   1   -1.00    0.50
  10  10  -1   -0.20    0.50
  10  10  -1   -0.70    0.50
 -10  10   1    0.70    0.50
   9 -10  -1   53.39    2.30
   9 -10  -1   56.89    2.40
  -9 -10   1   57.79    2.20
  -9 -10   1   56.69    2.30
   9  10  -1   56.69    2.30
   9  10  -1   54.59    2.20
  -9  10   1   59.49    2.30
   9  10  -1   56.69    2.30
  -9  10   1   54.19    2.10
  -8 -10   1    1.80    0.50
  -8 -10   1    1.40    0.50
   8 -10  -1    2.00    0.50
   8 -10  -1    3.10    0.60
  -8 -10   1    2.00    0.50
   8  10  -1    2.70    0.50
   8  10  -1    2.90    0.60
   8  10  -1    1.90    0.60
   8  10  -1    1.20    0.50
  -8  10   1    2.90    0.50
  -8  10   1    2.10    0.50
   7 -10  -1   30.00    1.50
   7 -10  -1   31.00    1.30
   7 -10  -1   28.20    1.40
  -7 -10   1   29.10    1.30
  -7 -10   1   30.50    1.30
  -7 -10   1   29.40    1.40
   7 -10  -1   30.40    1.20
   7  10  -1   27.80    1.30
   7  10  -1   30.20    1.40
  -7  10   1   29.00    1.30
   7  10  -1   31.00    1.40
  -7  10   1   29.10    1.20
   6 -10  -1   20.50    1.10
  -6 -10   1   20.00    1.00
   6 -10  -1   19.60    1.00
   6 -10  -1   19.70    0.90
   6 -10  -1   19.20    1.00
  -6 -10   1   19.50    1.00
  -6 -10   1   19.00    1.00
   6 -10  -1   21.20    0.90
   6  10  -1   20.50    1.10
  -6  10   1   20.70    1.00
   6  10  -1   19.70    1.10
  -6  10   1   20.20    0.90
   6  10  -1   20.50    1.00
  -6  10   1   20.00    0.90
   6  10  -1   20.10    1.00
  -6  10   1   20.10    1.00
  -5 -10   1    0.70    0.30
   5 -10  -1    0.40    0.20
   5 -10  -1    0.80    0.30
  -5 -10   1    0.50    0.30
   5 -10  -1    0.40    0.30
   5 -10  -1    1.40    0.40
   5 -10  -1    0.80    0.40
  -5 -10   1    0.10    0.30
  -5  10   1    0.50    0.20
   5  10  -1    0.70    0.40
  -5  10   1    0.50    0.30
   5  10  -1    0.30    0.30
   5  10  -1    0.40    0.40
  -5  10   1    0.70    0.30
   5  10  -1    0.80    0.30
  -4 -10   1   12.90    0.70
  -4 -10   1   14.00    0.80
  -4 -10   1   12.80    0.70
   4 -10  -1   12.90    0.70
   4 -10  -1   12.30    0.70
   4 -10  -1   14.50    0.70
  -4  10   1   12.80    0.60
   4  10  -1   14.20    0.70
  -4  10   1   12.50    0.70
  -4  10   1   13.40    0.70
  -4  10   1   12.90    0.60
   4  10  -1   11.00    0.70
   4  10  -1   13.20    0.80
   4  10  -1   13.30    0.70
   3 -10  -1    2.50    0.30
  -3 -10   1    2.90    0.40
   3 -10  -1    2.00    0.30
  -3 -10   1    2.00    0.30
   3 -10  -1    2.60    0.40
  -3 -10   1    2.10    0.30
  -3  10   1    2.40    0.30
   3  10  -1    2.20    0.30
  -3  10   1    2.20    0.30
   3  10  -1    1.70    0.30
  -3  10   1    2.30    0.30
   3  10  -1    3.00    0.40
  -3  10   1    2.60    0.30
  -3  10   1    2.50    0.30
   3  10  -1    2.60    0.40
   2 -10  -1   35.30    1.30
   2 -10  -1   35.90    1.30
  -2 -10   1   31.70    1.40
   2 -10  -1   34.70    1.30
  -2 -10   1   34.80    1.20
   2 -10  -1   35.60    1.20
  -2 -10   1   33.20    1.20
  -2  10   1   33.30    1.20
  -2  10   1   35.50    1.20
  -2  10   1   35.50    1.20
   2  10  -1   34.90    1.30
  -2  10   1   34.90    1.30
   2  10  -1   34.20    1.30
   2  10  -1   32.20    1.20
  -2  10   1   35.20    1.20
   2  10  -1   36.50    1.40
   1 -10  -1  151.28    5.30
  -1 -10   1  160.08    4.80
   1 -10  -1  160.58    5.30
  -1 -10   1  156.78    4.90
   1 -10  -1  161.38    4.80
   1  10  -1  152.48    4.90
   1  10  -1  151.18    4.80
   1  10  -1  161.98    5.30
  -1  10   1  162.68    4.80
  -1  10   1  156.08    4.90
   1  10  -1  161.98    5.20
  -1  10   1  158.58    5.00
   1  10  -1  156.78    4.90
  -1  10   1  149.69    4.90
  -1  10   1  162.28    5.00
   0 -10  -1   49.90    1.60
   0 -10   1   50.69    1.90
   0 -10   1   49.10    1.60
   0 -10  -1   45.40    1.80
   0 -10  -1   52.59    1.80
   0 -10   1   47.40    1.60
   0  10   1   47.80    1.60
   0  10  -1   50.39    1.70
   0  10   1   50.29    1.70
   0  10   1   47.70    1.60
   0  10  -1   49.99    1.80
   0  10  -1   47.20    1.60
   0  10   1   51.59    1.60
   0  10  -1   48.00    1.70
   0  10  -1   50.79    1.70
   1 -10   1    0.60    0.20
   1 -10   1    1.00    0.20
  -1 -10  -1    0.80    0.20
   1 -10   1    0.90    0.30
   1 -10   1    0.80    0.20
   1 -10   1    0.60    0.20
  -1 -10  -1    0.70    0.20
  -1  10  -1    0.60    0.20
   1  10   1    0.80    0.20
   1  10   1    0.30    0.10
   1  10   1    0.90    0.20
  -1  10  -1    0.40    0.30
  -1  10  -1    0.30    0.20
  -1  10  -1    1.00    0.30
   1  10   1    1.00    0.20
   1  10   1    0.60    0.20
  -2 -10  -1   31.90    1.40
   2 -10   1   35.30    1.20
   2 -10   1   33.60    1.20
   2 -10   1   34.10    1.20
  -2 -10  -1   36.40    1.20
  -2 -10  -1   34.70    1.20
   2 -10   1   36.20    1.30
   2 -10   1   33.90    1.40
   2  10   1   33.90    1.20
   2  10   1   34.10    1.30
  -2  10  -1   34.80    1.20
  -2  10  -1   33.60    1.30
  -2  10  -1   35.80    1.40
   2  10   1   35.70    1.20
  -2  10  -1   35.20    1.30
   2  10   1   33.60    1.20
   2  10   1   34.50    1.30
   3 -10   1  196.18    6.70
   3 -10   1  197.68    6.30
   3 -10   1  199.18    6.30
   3 -10   1  205.18    6.30
  -3 -10  -1  204.78    6.10
  -3 -10  -1  202.68    6.20
   3 -10   1  198.08    6.20
   3 -10   1  200.88    6.10
  -3 -10  -1  192.78    6.80
   3  10   1  198.68    6.30
  -3  10  -1  193.78    6.10
   3  10   1  200.58    6.20
   3  10   1  191.88    6.10
   3  10   1  200.88    6.20
  -3  10  -1  195.38    6.30
  -3  10  -1  192.58    6.20
   3  10   1  208.98    6.70
  -3  10  -1  205.68    6.70
   3  10   1  216.88    6.10
   4 -10   1    1.40    0.40
  -4 -10  -1    1.80    0.30
   4 -10   1    1.80    0.20
   4 -10   1    2.20    0.30
   4 -10   1    1.20    0.30
   4 -10   1    1.50    0.30
   4 -10   1    1.30    0.30
  -4 -10  -1    1.70    0.40
  -4 -10  -1    1.50    0.30
  -4  10  -1    1.70    0.30
   4  10   1    1.30    0.40
  -4  10  -1    2.00    0.40
  -4  10  -1    1.60    0.30
   4  10   1    1.80    0.30
   4  10   1    2.20    0.40
   4  10   1    1.80    0.30
   4  10   1    1.70    0.30
  -5 -10  -1    1.20    0.30
  -5 -10  -1    1.70    0.40
   5 -10   1    1.80    0.30
   5 -10   1    0.80    0.40
  -5 -10  -1    0.80    0.30
   5 -10   1    1.00    0.30
   5 -10   1    3.50    0.50
   5 -10   1    1.90    0.30
   5  10   1    1.20    0.40
  -5  10  -1    1.20    0.40
   5  10   1    1.20    0.40
   5  10   1    0.90    0.40
  -5  10  -1    1.00    0.30
  -5  10  -1    1.30    0.30
   5  10   1    1.10    0.30
   6 -10   1   16.00    0.90
  -6 -10  -1   16.20    0.90
   6 -10   1   17.40    1.00
   6 -10   1   16.60    0.80
  -6 -10  -1   15.60    0.90
   6 -10   1   17.10    0.90
   6 -10   1   17.10    0.90
  -6 -10  -1   16.60    0.90
   6  10   1   16.60    1.00
  -6  10  -1   17.10    0.90
  -6  10  -1   17.40    1.00
   6  10   1   16.30    0.90
   6  10   1   16.20    0.90
  -6  10  -1   15.90    0.90
   6  10   1   13.60    0.90
   7 -10   1   13.60    0.90
   7 -10   1   11.90    1.00
  -7 -10  -1   13.60    0.90
   7 -10   1   13.70    0.80
  -7 -10  -1   13.80    0.90
  -7 -10  -1   12.50    0.80
   7 -10   1   12.80    0.90
  -7  10  -1   13.50    0.80
   7  10   1   13.00    0.90
   7  10   1   13.20    0.90
  -7  10  -1   13.40    0.90
   7  10   1   13.90    1.00
   8 -10   1    7.60    0.60
  -8 -10  -1    7.50    0.70
   8 -10   1    9.10    0.80
   8 -10   1    9.10    0.90
   8 -10   1    8.40    0.80
  -8 -10  -1    7.40    0.70
  -8  10  -1    8.30    0.70
  -8  10  -1    8.50    0.70
   8  10   1    6.70    0.80
   8  10   1    8.00    0.80
   8  10   1    8.00    0.70
   9 -10   1    1.60    0.60
   9 -10   1    1.60    0.50
  -9 -10  -1    0.80    0.50
   9 -10   1    1.10    0.50
  -9 -10  -1    0.60    0.50
   9 -10   1    0.80    0.60
  -9  10  -1    1.10    0.50
  -9  10  -1    0.20    0.50
   9  10   1    1.00    0.50
   9  10   1    1.80    0.70
   9  10   1    1.50    0.60
   9  10   1    0.60    0.50
  10 -10   1   -0.70    0.60
  10 -10   1   -0.60    0.50
 -10 -10  -1    0.40    0.40
 -10 -10  -1    0.20    0.50
  10  10   1    0.40    0.50
  10  10   1   -0.10    0.60
 -10  10  -1   -0.70    0.50
 -10  10  -1   -0.30    0.50
  10  10   1   -0.40    0.50
  10  10   1   -0.50    0.60
  11 -10   1    0.70    0.70
  11 -10   1    1.00    0.70
 -11 -10  -1    0.90    0.60
 -11  10  -1    2.20    0.70
  11  10   1    1.80    0.60
  11  10   1    1.60    0.70
 -11  10  -1    1.50    0.60
  12 -10   1    1.60    0.80
  12  10   1    1.10    0.80
  12  10   1    1.20    0.70
 -12  10  -1   -0.30    0.60
  13 -10   1    0.10    0.80
  13  10   1   -0.40    0.70
 -13  10  -1   -0.70    0.60
  13  10   1    0.00    0.70
  14 -10   1   -0.70    0.80
  14  10   1   -0.70    0.80
 -14  10  -1   -1.30    0.70
  14  10   1    0.10    0.80
 -14 -11   1    1.10    0.80
  14 -11  -1    1.80    1.00
  14  11  -1   -0.50    0.80
  14  11  -1    0.40    0.90
 -14  11   1    0.50    0.70
 -13 -11   1    4.90    0.80
  13 -11  -1    3.90    0.90
  13  11  -1    2.60    0.90
  13  11  -1    4.40    0.90
 -13  11   1    3.80    0.80
 -12 -11   1    0.90    0.60
  12 -11  -1    1.20    0.80
  12 -11  -1    0.70    0.70
 -12  11   1    1.50    0.70
  12  11  -1    0.30    0.60
  12  11  -1    1.00    0.70
 -12  11   1    1.30    0.60
  11 -11  -1    2.00    0.80
  11 -11  -1    3.10    0.80
 -11 -11   1    2.40    0.60
 -11  11   1    3.20    0.70
  11  11  -1    2.10    0.80
  11  11  -1    1.70    0.70
 -11  11   1    1.40    0.60
  10 -11  -1    7.00    0.90
 -10 -11   1    8.40    0.80
  10 -11  -1    6.90    0.90
 -10  11   1    8.80    0.90
 -10  11   1    8.00    0.70
  10  11  -1    8.00    0.90
  10  11  -1    7.20    0.90
   9 -11  -1   14.70    1.10
   9 -11  -1   13.30    1.10
  -9 -11   1   13.40    0.90
  -9 -11   1   11.90    0.90
  -9  11   1   12.50    1.00
   9  11  -1   12.20    1.00
   9  11  -1   12.70    1.10
   9  11  -1    9.90    0.90
  -9  11   1   12.00    0.90
  -8 -11   1   17.20    1.00
  -8 -11   1   15.30    1.00
  -8 -11   1   15.50    1.00
   8 -11  -1   14.70    1.10
   8 -11  -1   16.30    1.20
  -8  11   1   17.40    1.00
  -8  11   1   15.70    0.90
   8  11  -1   15.30    1.00
   8  11  -1   14.60    1.00
   8  11  -1   13.60    1.20
   8  11  -1   18.20    1.10
   7 -11  -1   42.40    1.70
  -7 -11   1   43.50    1.70
   7 -11  -1   43.40    1.90
   7 -11  -1   44.70    1.70
  -7 -11   1   42.30    1.80
   7 -11  -1   43.30    1.80
  -7 -11   1   42.10    1.70
   7  11  -1   42.10    1.80
  -7  11   1   43.20    1.70
   7  11  -1   40.80    1.70
   7  11  -1   42.90    1.70
  -7  11   1   43.40    1.60
   6 -11  -1   36.00    1.60
  -6 -11   1   39.90    1.60
   6 -11  -1   40.60    1.50
   6 -11  -1   38.20    1.50
   6 -11  -1   39.20    1.70
  -6 -11   1   38.80    1.50
  -6 -11   1   40.30    1.50
  -6  11   1   38.40    1.50
  -6  11   1   36.90    1.60
   6  11  -1   39.80    1.60
  -6  11   1   38.00    1.40
   6  11  -1   39.80    1.50
   6  11  -1   37.90    1.70
  -6  11   1   41.00    1.50
   6  11  -1   38.90    1.60
   5 -11  -1    4.20    0.50
   5 -11  -1    4.20    0.40
  -5 -11   1    4.60    0.50
  -5 -11   1    3.60    0.40
  -5 -11   1    4.60    0.50
   5 -11  -1    4.00    0.50
   5 -11  -1    3.70    0.40
  -5  11   1    3.80    0.40
   5  11  -1    3.50    0.40
  -5  11   1    3.30    0.40
  -5  11   1    3.80    0.40
   5  11  -1    4.10    0.50
   5  11  -1    4.40    0.50
   5  11  -1    3.80    0.50
   4 -11  -1   63.49    2.10
  -4 -11   1   62.69    2.40
   4 -11  -1   62.09    2.30
  -4 -11   1   64.19    2.10
  -4 -11   1   60.89    2.10
   4 -11  -1   61.69    2.20
  -4  11   1   63.69    2.10
  -4  11   1   62.19    2.00
   4  11  -1   62.79    2.20
   4  11  -1   61.39    2.10
   4  11  -1   62.19    2.20
  -4  11   1   63.29    2.10
  -4  11   1   60.39    2.20
   4  11  -1   66.09    2.40
   3 -11  -1   32.00    1.30
   3 -11  -1   32.60    1.30
  -3 -11   1   32.60    1.20
  -3 -11   1   33.40    1.20
   3 -11  -1   33.40    1.20
  -3 -11   1   31.20    1.40
  -3  11   1   33.30    1.10
   3  11  -1   33.30    1.40
  -3  11   1   31.90    1.20
   3  11  -1   31.80    1.20
   3  11  -1   30.10    1.20
  -3  11   1   32.40    1.30
   3  11  -1   33.20    1.30
  -3  11   1   33.40    1.20
  -2 -11   1  224.68    7.00
   2 -11  -1  236.78    6.90
  -2 -11   1  221.68    7.70
   2 -11  -1  229.08    7.70
   2 -11  -1  235.08    7.60
  -2 -11   1  234.18    7.10
   2 -11  -1  228.18    7.20
  -2  11   1  239.08    6.90
  -2  11   1  221.08    7.10
   2  11  -1  224.48    7.10
  -2  11   1  220.98    7.20
  -2  11   1  229.88    7.20
   2  11  -1  239.98    7.70
  -2  11   1  238.88    7.10
   2  11  -1  217.38    7.00
   2  11  -1  229.68    7.10
  -1 -11   1   48.30    1.70
  -1 -11   1   49.20    1.60
   1 -11  -1   50.59    1.80
   1 -11  -1   47.50    1.80
   1 -11  -1   49.99    1.60
  -1  11   1   48.90    1.70
   1  11  -1   49.70    1.70
   1  11  -1   46.00    1.60
  -1  11   1   48.10    1.60
  -1  11   1   47.20    1.60
   1  11  -1   47.40    1.70
  -1  11   1   50.89    1.60
   1  11  -1   47.20    1.70
   1  11  -1   49.99    1.80
   0 -11  -1    6.40    0.40
   0 -11   1    6.70    0.40
   0 -11   1    6.30    0.50
   0 -11  -1    6.20    0.50
   0 -11   1    6.40    0.40
   0 -11  -1    7.50    0.50
   0  11   1    6.40    0.50
   0  11  -1    6.40    0.40
   0  11  -1    6.60    0.40
   0  11   1    6.60    0.40
   0  11   1    6.70    0.40
   0  11  -1    6.80    0.50
   0  11  -1    7.30    0.50
   0  11   1    5.60    0.40
   0  11  -1    6.50    0.50
   1 -11   1   29.00    1.10
   1 -11   1   30.60    1.10
   1 -11   1   30.50    1.10
  -1 -11  -1   28.40    1.00
   1 -11   1   27.40    1.20
   1  11   1   28.10    1.00
   1  11   1   28.40    1.00
  -1  11  -1   27.70    1.10
  -1  11  -1   26.80    1.20
  -1  11  -1   29.40    1.10
  -1  11  -1   26.60    1.00
   1  11   1   28.50    1.00
   1  11   1   26.90    1.10
   2 -11   1  240.98    7.40
   2 -11   1  238.28    8.00
  -2 -11  -1  245.78    7.20
   2 -11   1  243.28    7.50
   2 -11   1  249.08    7.30
   2 -11   1  239.88    7.20
  -2 -11  -1  228.98    8.00
  -2 -11  -1  246.58    7.30
   2 -11   1  244.98    7.40
  -2  11  -1  233.98    7.40
   2  11   1  232.58    7.30
  -2  11  -1  230.98    7.30
   2  11   1  240.68    7.20
   2  11   1  230.18    7.40
  -2  11  -1  236.38    7.90
  -2  11  -1  224.28    7.20
   2  11   1  225.78    7.20
   3 -11   1    8.90    0.50
   3 -11   1    7.70    0.50
   3 -11   1    9.40    0.60
  -3 -11  -1    7.20    0.50
  -3 -11  -1    8.10    0.50
  -3 -11  -1    8.20    0.70
   3 -11   1    8.20    0.60
   3 -11   1    7.50    0.60
   3 -11   1    9.10    0.40
   3  11   1    8.60    0.60
   3  11   1    7.30    0.50
  -3  11  -1    8.10    0.60
   3  11   1    8.10    0.60
  -3  11  -1    8.10    0.50
   3  11   1    7.30    0.60
   3  11   1    7.90    0.50
  -3  11  -1    7.70    0.60
  -3  11  -1    7.10    0.60
   4 -11   1    5.10    0.50
  -4 -11  -1    5.00    0.40
   4 -11   1    4.70    0.30
   4 -11   1    4.50    0.40
   4 -11   1    4.50    0.40
   4 -11   1    5.10    0.50
  -4 -11  -1    5.80    0.50
  -4 -11  -1    5.40    0.50
   4 -11   1    4.80    0.40
   4  11   1    4.70    0.40
   4  11   1    4.50    0.50
  -4  11  -1    5.30    0.50
  -4  11  -1    5.00    0.50
  -4  11  -1    3.80    0.40
   4  11   1    4.50    0.50
   4  11   1    5.90    0.50
   4  11   1    4.80    0.50
   5 -11   1   36.30    1.60
  -5 -11  -1   36.90    1.40
   5 -11   1   38.90    1.40
  -5 -11  -1   37.10    1.40
   5 -11   1   37.10    1.40
  -5 -11  -1   36.10    1.60
   5 -11   1   37.30    1.50
   5 -11   1   38.70    1.50
   5 -11   1   39.00    1.40
  -5  11  -1   37.40    1.60
   5  11   1   36.80    1.40
   5  11   1   35.10    1.50
  -5  11  -1   35.20    1.40
   5  11   1   39.10    1.60
   5  11   1   36.80    1.40
   5  11   1   36.20    1.40
  -5  11  -1   38.30    1.40
   6 -11   1    8.20    0.70
   6 -11   1    8.40    0.60
   6 -11   1    9.10    0.70
   6 -11   1    8.60    0.70
  -6 -11  -1    9.00    0.70
  -6 -11  -1    7.70    0.60
  -6 -11  -1    8.30    0.70
   6 -11   1    8.60    0.60
   6  11   1    7.30    0.70
   6  11   1    8.80    0.70
  -6  11  -1    8.70    0.70
   6  11   1    8.90    0.70
   6  11   1   10.00    0.80
  -6  11  -1    8.50    0.70
  -6  11  -1    9.10    0.80
   6  11   1    9.20    0.70
   7 -11   1    7.60    0.70
  -7 -11  -1    7.70    0.70
  -7 -11  -1    6.60    0.70
   7 -11   1    6.30    0.60
   7 -11   1    6.20    0.60
   7 -11   1    6.50    0.70
  -7  11  -1    7.20    0.60
   7  11   1    7.40    0.70
   7  11   1    7.50    0.70
  -7  11  -1    6.30    0.60
   7  11   1    6.70    0.70
   7  11   1    6.00    0.70
   8 -11   1   48.10    2.00
  -8 -11  -1   48.50    2.10
   8 -11   1   50.89    2.20
  -8 -11  -1   50.79    2.00
   8 -11   1   49.80    2.00
   8 -11   1   49.99    2.00
   8  11   1   47.30    2.00
   8  11   1   48.80    2.00
   8  11   1   51.69    2.00
  -8  11  -1   51.09    2.00
  -8  11  -1   48.80    1.90
   8  11   1   51.79    2.00
   9 -11   1    0.70    0.60
  -9 -11  -1    0.50    0.50
  -9 -11  -1    0.40    0.40
   9 -11   1    1.50    0.60
   9  11   1    0.90    0.50
   9  11   1    0.50    0.50
  -9  11  -1    0.10    0.50
  -9  11  -1    1.30    0.50
   9  11   1    1.00    0.60
   9  11   1    1.10    0.60
  10 -11   1    0.40    0.50
 -10 -11  -1    0.20    0.50
  10 -11   1   -0.10    0.60
 -10 -11  -1    0.40    0.50
 -10  11  -1   -0.10    0.50
  10  11   1    0.60    0.60
 -10  11  -1   -0.60    0.50
  10  11   1    0.10    0.60
  10  11   1    0.40    0.60
  10  11   1    0.90    0.60
  11 -11   1    1.60    0.60
  11 -11   1    2.00    0.80
 -11 -11  -1    1.40    0.60
 -11  11  -1    1.50    0.60
 -11  11  -1    1.90    0.70
  11  11   1    1.60    0.70
  11  11   1    1.50    0.60
  12 -11   1    0.80    0.80
 -12  11  -1    1.30    0.70
  12  11   1    0.70    0.70
  12  11   1    1.20    0.70
  13 -11   1   -0.20    0.70
  13  11   1    0.60    0.70
  13  11   1    0.10    0.80
 -13  11  -1    0.30    0.70
  14 -12  -1    0.80    0.90
  14  12  -1    0.80    0.80
 -13 -12   1   -0.30    0.70
  13 -12  -1    0.10    0.80
  13  12  -1    0.50    0.90
 -13  12   1    0.40    0.60
  13  12  -1    0.00    0.70
 -12 -12   1    8.70    1.00
  12 -12  -1    7.30    1.00
  12 -12  -1    5.90    1.00
  12  12  -1    6.80    1.00
 -12  12   1    6.10    0.90
 -12  12   1    7.10    0.80
  12  12  -1    5.70    0.90
  11 -12  -1    2.00    0.70
 -11 -12   1    2.30    0.60
  11 -12  -1    2.10    0.80
  11  12  -1    1.30    0.80
 -11  12   1    0.90    0.50
 -11  12   1    1.80    0.60
  11  12  -1    0.30    0.60
  10 -12  -1    7.00    0.90
 -10 -12   1    8.60    0.80
  10 -12  -1    8.50    0.90
  10  12  -1    7.10    0.80
 -10  12   1    7.10    0.70
 -10  12   1    9.00    0.90
  10  12  -1    7.50    1.00
   9 -12  -1    2.50    0.70
  -9 -12   1    3.70    0.60
   9 -12  -1    2.20    0.70
  -9 -12   1    2.40    0.60
  -9  12   1    2.40    0.50
  -9  12   1    2.90    0.60
   9  12  -1    2.40    0.60
   9  12  -1    2.30    0.60
   9  12  -1    3.80    0.70
  -8 -12   1    3.60    0.60
  -8 -12   1    3.80    0.60
   8 -12  -1    4.40    0.70
   8 -12  -1    3.80    0.70
   8  12  -1    3.80    0.60
   8  12  -1    4.30    0.70
   8  12  -1    2.80    0.60
  -8  12   1    3.80    0.50
  -8  12   1    4.20    0.60
   7 -12  -1    2.50    0.40
   7 -12  -1    2.10    0.50
  -7 -12   1    2.30    0.50
  -7 -12   1    2.40    0.50
  -7 -12   1    2.20    0.50
   7 -12  -1    2.50    0.50
  -7  12   1    2.70    0.40
   7  12  -1    1.80    0.50
   7  12  -1    1.30    0.40
   7  12  -1    1.60    0.60
   7  12  -1    1.80    0.50
  -7  12   1    2.00    0.50
  -6 -12   1   58.69    2.30
   6 -12  -1   57.69    2.30
  -6 -12   1   58.09    2.20
   6 -12  -1   60.69    2.10
   6 -12  -1   58.69    2.20
  -6 -12   1   61.29    2.20
   6 -12  -1   62.19    2.20
  -6  12   1   64.49    2.10
   6  12  -1   62.69    2.20
  -6  12   1   59.69    2.20
   6  12  -1   57.19    2.10
   6  12  -1   61.49    2.40
   6  12  -1   59.49    2.30
   5 -12  -1   19.40    1.00
  -5 -12   1   20.20    1.00
   5 -12  -1   19.80    1.00
   5 -12  -1   21.30    1.00
  -5 -12   1   21.40    1.00
  -5 -12   1   19.60    1.00
   5 -12  -1   20.20    0.90
   5  12  -1   19.00    1.10
  -5  12   1   20.60    0.90
  -5  12   1   22.80    0.90
  -5  12   1   21.50    1.00
   5  12  -1   19.40    1.00
   5  12  -1   20.50    1.00
   5  12  -1   20.70    1.00
   4 -12  -1    0.50    0.30
   4 -12  -1    0.10    0.20
   4 -12  -1    0.40    0.30
  -4 -12   1   -0.10    0.30
  -4 -12   1    0.90    0.40
  -4 -12   1    0.10    0.30
  -4  12   1    0.40    0.30
   4  12  -1    0.40    0.30
   4  12  -1    0.30    0.40
  -4  12   1    0.50    0.20
   4  12  -1    0.50    0.40
   4  12  -1    0.40    0.30
  -4  12   1    0.10    0.20
  -4  12   1    0.10    0.30
  -3 -12   1   14.30    0.70
  -3 -12   1   13.60    0.80
   3 -12  -1   15.10    0.50
   3 -12  -1   14.20    0.80
   3 -12  -1   12.70    0.80
  -3 -12   1   14.90    0.70
   3 -12  -1   14.70    0.70
  -3  12   1   15.50    0.70
  -3  12   1   14.00    0.80
  -3  12   1   15.40    0.70
   3  12  -1   14.20    0.80
   3  12  -1   15.20    0.80
   3  12  -1   13.10    0.70
   3  12  -1   14.00    0.80
  -3  12   1   13.20    0.70
  -2 -12   1  675.03   19.90
  -2 -12   1  640.14   19.50
  -2 -12   1  645.74   21.60
   2 -12  -1  630.64   21.50
   2 -12  -1  672.63   19.50
  -2  12   1  627.24   20.00
   2  12  -1  685.23   21.20
  -2  12   1  684.33   19.90
  -2  12   1  647.04   19.90
   2  12  -1  642.74   21.40
   2  12  -1  652.03   20.00
   2  12  -1  638.24   19.90
  -2  12   1  674.73   20.20
   2  12  -1  627.64   19.50
  -2  12   1  687.33   19.50
  -1 -12   1   -0.20    0.20
  -1 -12   1   -0.10    0.10
   1 -12  -1    0.10    0.30
   1 -12  -1   -0.20    0.30
  -1 -12   1   -0.20    0.20
   1 -12  -1    0.40    0.20
  -1  12   1    0.00    0.20
   1  12  -1   -0.20    0.20
  -1  12   1    0.20    0.20
   1  12  -1   -0.50    0.20
  -1  12   1   -0.40    0.30
   1  12  -1   -0.10    0.30
  -1  12   1    0.00    0.10
   1  12  -1    0.00    0.20
   1  12  -1    0.00    0.20
  -1  12   1   -0.10    0.20
   0 -12  -1   36.70    1.50
   0 -12   1   39.10    1.40
   0 -12   1   39.40    1.40
   0 -12  -1   39.90    1.30
   0 -12   1   36.90    1.50
   0 -12   1   40.30    1.40
   0  12  -1   38.20    1.40
   0  12  -1   38.90    1.50
   0  12   1   38.10    1.40
   0  12   1   35.90    1.30
   0  12   1   39.40    1.30
   0  12   1   39.40    1.30
   0  12  -1   37.30    1.40
   0  12  -1   36.70    1.30
   1 -12   1    2.30    0.30
  -1 -12  -1    2.50    0.40
   1 -12   1    2.10    0.30
   1 -12   1    2.30    0.30
  -1 -12  -1    2.30    0.30
   1 -12   1    2.60    0.30
   1  12   1    1.10    0.20
   1  12   1    2.50    0.30
  -1  12  -1    2.10    0.30
   1  12   1    2.20    0.30
  -1  12  -1    2.40    0.30
   1  12   1    2.00    0.40
  -1  12  -1    2.40    0.40
  -1  12  -1    2.20    0.30
  -2 -12  -1   48.90    2.00
   2 -12   1   52.39    1.80
  -2 -12  -1   55.19    1.80
  -2 -12  -1   53.29    1.70
   2 -12   1   51.79    1.80
   2 -12   1   51.89    1.80
   2 -12   1   49.90    2.00
   2 -12   1   52.99    1.70
   2 -12   1   51.39    1.80
   2  12   1   54.69    1.70
   2  12   1   50.89    1.80
  -2  12  -1   53.89    2.00
  -2  12  -1   50.99    1.80
  -2  12  -1   50.49    1.70
   2  12   1   50.39    1.70
  -2  12  -1   49.90    1.80
   2  12   1   50.49    1.80
   3 -12   1    7.20    0.40
   3 -12   1    6.80    0.50
   3 -12   1    6.90    0.50
   3 -12   1    6.50    0.50
  -3 -12  -1    6.60    0.60
   3 -12   1    6.40    0.50
  -3 -12  -1    7.30    0.50
  -3 -12  -1    7.10    0.50
   3 -12   1    7.20    0.60
   3  12   1    7.50    0.60
   3  12   1    6.20    0.50
   3  12   1    5.80    0.50
  -3  12  -1    6.50    0.50
  -3  12  -1    6.30    0.50
  -3  12  -1    7.40    0.60
   3  12   1    6.80    0.50
  -3  12  -1    7.40    0.60
   3  12   1    6.60    0.60
  -4 -12  -1   14.80    0.80
   4 -12   1   14.50    0.70
  -4 -12  -1   15.10    0.80
   4 -12   1   15.20    0.60
  -4 -12  -1   15.30    0.70
   4 -12   1   15.10    0.80
   4 -12   1   14.70    0.80
   4 -12   1   13.60    0.80
   4 -12   1   15.40    0.80
  -4  12  -1   15.20    0.80
   4  12   1   15.50    0.90
   4  12   1   15.40    0.80
  -4  12  -1   15.20    0.80
  -4  12  -1   15.00    0.90
   4  12   1   14.70    0.80
   4  12   1   16.00    0.80
   4  12   1   15.40    0.90
  -4  12  -1   14.70    0.80
   5 -12   1   17.80    0.90
  -5 -12  -1   19.80    0.90
   5 -12   1   18.00    0.90
  -5 -12  -1   16.80    0.90
   5 -12   1   18.80    0.90
  -5 -12  -1   17.40    1.00
   5 -12   1   17.80    0.90
   5 -12   1   17.80    1.00
   5 -12   1   18.70    0.90
   5  12   1   17.10    1.00
  -5  12  -1   18.60    1.00
   5  12   1   17.60    0.90
  -5  12  -1   18.60    0.90
   5  12   1   18.30    0.90
   5  12   1   17.70    1.00
  -5  12  -1   17.50    0.90
   5  12   1   18.90    0.90
  -6 -12  -1    2.90    0.50
   6 -12   1    3.20    0.50
   6 -12   1    3.40    0.50
   6 -12   1    3.40    0.50
  -6 -12  -1    2.80    0.40
  -6 -12  -1    2.40    0.40
   6 -12   1    4.30    0.50
  -6  12  -1    2.60    0.40
   6  12   1    3.60    0.60
  -6  12  -1    3.80    0.50
   6  12   1    3.60    0.50
   6  12   1    2.70    0.50
   6  12   1    2.80    0.50
  -6  12  -1    3.40    0.50
   6  12   1    3.90    0.60
   7 -12   1   49.50    1.90
  -7 -12  -1   46.40    1.80
  -7 -12  -1   45.00    2.00
   7 -12   1   45.90    1.90
   7 -12   1   48.60    2.10
   7 -12   1   47.70    1.90
  -7  12  -1   45.50    1.80
   7  12   1   45.70    1.90
   7  12   1   47.10    1.90
   7  12   1   46.50    1.90
  -7  12  -1   45.80    1.80
   7  12   1   47.30    1.80
  -8 -12  -1    5.10    0.70
   8 -12   1    4.00    0.60
   8 -12   1    4.30    0.70
  -8 -12  -1    3.90    0.60
   8 -12   1    4.70    0.70
   8 -12   1    5.20    0.70
   8  12   1    4.60    0.80
   8  12   1    5.30    0.70
  -8  12  -1    5.30    0.70
   8  12   1    4.70    0.70
  -8  12  -1    3.90    0.60
   8  12   1    5.00    0.60
   9 -12   1   -0.10    0.60
   9 -12   1    0.40    0.60
  -9 -12  -1    0.40    0.50
  -9 -12  -1    0.70    0.50
   9  12   1    0.20    0.50
   9  12   1    1.10    0.60
  -9  12  -1   -0.10    0.50
  -9  12  -1    0.90    0.50
   9  12   1    0.10    0.50
   9  12   1    0.50    0.60
 -10 -12  -1    0.90    0.50
  10 -12   1    1.10    0.60
 -10 -12  -1    1.70    0.60
  10 -12   1   -0.70    0.60
 -10  12  -1    0.30    0.50
  10  12   1    0.40    0.60
  10  12   1    0.10    0.60
  10  12   1   -0.10    0.60
 -10  12  -1   -0.10    0.50
  10  12   1    0.70    0.60
  11 -12   1    0.50    0.70
  11 -12   1   -0.10    0.70
  11  12   1    0.20    0.70
 -11  12  -1   -0.50    0.50
 -11  12  -1   -0.50    0.50
  11  12   1   -0.60    0.60
  12 -12   1    0.20    0.70
  12  12   1   -0.20    0.70
 -12  12  -1    0.10    0.60
  12  12   1    0.00    0.70
  13 -12   1    3.20    1.00
  13  12   1    1.40    0.90
  13  12   1    3.60    0.90
 -13  12  -1    3.90    0.80
 -13 -13   1    0.90    0.70
  13 -13  -1   -0.60    0.80
  13  13  -1    1.00    0.90
  13  13  -1   -0.10    0.70
 -13  13   1    1.30    0.70
  12 -13  -1    0.70    0.80
  12 -13  -1    0.10    0.70
 -12 -13   1    0.60    0.60
 -12  13   1    1.50    0.70
  12  13  -1    0.70    0.70
  12  13  -1    1.50    0.80
 -12  13   1    0.90    0.60
  11 -13  -1    0.00    0.70
  11 -13  -1    0.60    0.60
 -11 -13   1    1.90    0.60
  11  13  -1    0.20    0.60
 -11  13   1    1.10    0.50
  11  13  -1    1.50    0.80
 -11  13   1    0.20    0.60
  10 -13  -1    2.20    0.80
 -10 -13   1    3.10    0.70
  10 -13  -1    3.40    0.70
 -10 -13   1    4.00    0.60
 -10  13   1    3.20    0.60
  10  13  -1    3.10    0.70
 -10  13   1    3.10    0.70
  10  13  -1    2.80    0.70
   9 -13  -1   15.60    1.20
  -9 -13   1   17.30    1.10
  -9 -13   1   17.10    1.10
   9 -13  -1   18.40    1.30
   9  13  -1   17.10    1.20
   9  13  -1   15.70    1.30
  -9  13   1   14.00    1.10
  -9  13   1   17.50    1.00
   9  13  -1   16.00    1.10
   8 -13  -1  102.59    3.90
  -8 -13   1  102.79    3.80
   8 -13  -1  101.79    3.70
  -8 -13   1  101.79    3.50
   8  13  -1  101.49    3.50
   8  13  -1  105.19    3.60
   8  13  -1  101.49    3.70
  -8  13   1  107.69    3.60
  -8  13   1  103.69    3.40
  -7 -13   1    2.60    0.50
   7 -13  -1    2.80    0.40
   7 -13  -1    2.10    0.50
   7 -13  -1    3.20    0.60
  -7 -13   1    2.70    0.50
  -7 -13   1    2.50    0.50
   7  13  -1    2.20    0.50
   7  13  -1    2.20    0.60
   7  13  -1    2.10    0.50
  -7  13   1    2.50    0.40
   7  13  -1    2.00    0.50
  -7  13   1    2.30    0.50
  -6 -13   1   34.00    1.50
   6 -13  -1   36.00    1.40
   6 -13  -1   34.70    1.50
  -6 -13   1   34.80    1.50
   6 -13  -1   35.50    1.40
  -6 -13   1   36.60    1.50
   6 -13  -1   34.90    1.60
   6  13  -1   34.00    1.50
   6  13  -1   33.10    1.40
   6  13  -1   36.30    1.50
  -6  13   1   35.10    1.40
   6  13  -1   33.90    1.60
   5 -13  -1    9.10    0.70
  -5 -13   1    8.20    0.70
  -5 -13   1    9.60    0.70
  -5 -13   1    9.80    0.70
   5 -13  -1    9.00    0.60
   5 -13  -1    8.50    0.60
  -5  13   1    8.30    0.70
   5  13  -1   10.60    0.80
   5  13  -1   10.20    0.80
  -5  13   1    9.10    0.60
   5  13  -1    8.40    0.70
  -5  13   1   10.70    0.80
   5  13  -1    9.60    0.70
   4 -13  -1    0.10    0.30
  -4 -13   1    0.40    0.30
   4 -13  -1   -0.10    0.20
  -4 -13   1   -0.10    0.30
   4 -13  -1    0.00    0.30
  -4 -13   1    0.10    0.30
  -4  13   1   -0.30    0.20
   4  13  -1    0.00    0.30
   4  13  -1   -0.40    0.30
  -4  13   1    0.10    0.10
   4  13  -1   -0.40    0.30
   4  13  -1    0.10    0.30
  -4  13   1    0.10    0.30
  -4  13   1   -0.40    0.30
  -3 -13   1   34.70    1.50
   3 -13  -1   32.90    1.40
   3 -13  -1   35.80    1.30
   3 -13  -1   34.80    1.40
  -3 -13   1   34.60    1.30
  -3 -13   1   33.30    1.30
   3 -13  -1   35.90    1.20
   3  13  -1   35.50    1.40
  -3  13   1   34.70    1.30
  -3  13   1   37.20    1.20
   3  13  -1   37.10    1.50
  -3  13   1   32.90    1.40
   3  13  -1   35.70    1.40
   3  13  -1   32.80    1.30
  -2 -13   1   23.00    0.90
  -2 -13   1   22.60    1.10
   2 -13  -1   21.90    1.00
   2 -13  -1   21.70    0.90
  -2 -13   1   21.00    0.90
   2  13  -1   21.50    0.90
  -2  13   1   23.10    0.80
   2  13  -1   23.20    1.10
  -2  13   1   20.40    1.00
  -2  13   1   19.70    0.90
  -2  13   1   21.00    0.90
   2  13  -1   21.80    0.90
  -2  13   1   20.60    0.90
   2  13  -1   19.70    1.00
   2  13  -1   22.60    0.80
  -1 -13   1   42.20    1.50
   1 -13  -1   41.10    1.60
  -1 -13   1   41.20    1.50
   1 -13  -1   40.00    1.70
   1 -13  -1   43.40    1.40
  -1  13   1   40.00    1.50
  -1  13   1   43.80    1.40
   1  13  -1   42.20    1.60
  -1  13   1   42.30    1.50
   1  13  -1   41.60    1.50
   1  13  -1   39.90    1.40
  -1  13   1   39.70    1.40
   1  13  -1   37.50    1.50
   1  13  -1   42.50    1.40
   0 -13   1  112.69    3.60
   0 -13  -1  113.09    3.50
   0 -13   1  111.09    3.50
   0 -13   1  110.49    3.50
   0 -13  -1  113.19    3.90
   0 -13   1  105.59    3.90
   0  13   1  106.49    3.50
   0  13  -1  103.59    3.40
   0  13  -1  108.99    3.50
   0  13   1  108.09    3.60
   0  13  -1  109.89    3.80
   0  13   1  117.09    3.50
   0  13   1  114.79    3.40
   0  13  -1  107.89    3.60
   1 -13   1  131.49    4.10
   1 -13   1  134.29    4.20
  -1 -13  -1  137.59    4.10
  -1 -13  -1  132.49    4.60
   1 -13   1  129.69    4.60
   1 -13   1  131.29    4.20
  -1  13  -1  139.49    4.50
  -1  13  -1  124.29    4.10
  -1  13  -1  134.59    4.20
   1  13   1  127.69    4.20
   1  13   1  142.59    4.10
  -1  13  -1  126.09    4.20
   1  13   1  127.89    4.30
  -2 -13  -1  187.18    5.70
   2 -13   1  181.48    5.80
  -2 -13  -1  183.88    6.30
   2 -13   1  183.28    5.80
   2 -13   1  178.98    5.80
   2 -13   1  183.88    6.30
  -2 -13  -1  188.88    5.70
   2 -13   1  185.28    5.70
   2 -13   1  186.18    5.90
   2  13   1  182.78    5.90
  -2  13  -1  181.28    5.80
  -2  13  -1  181.18    5.70
  -2  13  -1  190.78    6.20
  -2  13  -1  182.68    5.80
   2  13   1  192.78    5.60
   2  13   1  180.58    5.60
   2  13   1  181.18    5.80
   3 -13   1   15.80    0.90
   3 -13   1   15.90    0.80
   3 -13   1   17.00    0.80
  -3 -13  -1   16.60    0.90
   3 -13   1   16.20    0.70
  -3 -13  -1   16.90    0.80
   3 -13   1   17.00    0.80
   3 -13   1   17.10    0.80
  -3 -13  -1   17.10    0.80
  -3  13  -1   16.60    0.80
  -3  13  -1   16.20    0.80
   3  13   1   16.50    0.90
  -3  13  -1   17.60    0.90
  -3  13  -1   15.20    0.80
   3  13   1   15.90    0.90
   3  13   1   15.00    0.70
   3  13   1   17.00    0.80
   3  13   1   17.00    0.80
   4 -13   1    0.90    0.30
  -4 -13  -1    0.30    0.30
   4 -13   1    0.30    0.30
   4 -13   1    0.30    0.30
  -4 -13  -1    0.20    0.30
  -4 -13  -1    0.10    0.20
   4 -13   1    0.30    0.30
   4 -13   1    0.20    0.10
   4 -13   1    0.20    0.30
   4  13   1    0.50    0.30
   4  13   1   -0.40    0.30
  -4  13  -1    0.00    0.30
   4  13   1    0.40    0.30
  -4  13  -1    0.40    0.30
   4  13   1    0.70    0.40
  -4  13  -1    0.10    0.30
  -4  13  -1   -0.20    0.30
   5 -13   1    0.30    0.30
  -5 -13  -1    0.20    0.30
   5 -13   1    0.30    0.30
   5 -13   1    0.20    0.30
   5 -13   1    0.00    0.40
  -5 -13  -1   -0.30    0.30
   5 -13   1    0.20    0.30
   5 -13   1    0.10    0.40
  -5 -13  -1    0.60    0.30
   5  13   1    0.60    0.40
  -5  13  -1    0.60    0.40
  -5  13  -1    0.20    0.30
   5  13   1    0.60    0.40
   5  13   1    0.10    0.40
   5  13   1    0.20    0.30
   5  13   1    0.00    0.40
  -5  13  -1    0.20    0.30
   6 -13   1    0.80    0.40
   6 -13   1    1.30    0.50
  -6 -13  -1    0.80    0.40
   6 -13   1    1.20    0.50
   6 -13   1    1.50    0.40
  -6 -13  -1    1.80    0.40
   6  13   1    1.00    0.40
  -6  13  -1    0.90    0.40
   6  13   1    1.00    0.40
  -6  13  -1    1.30    0.40
   6  13   1    1.10    0.50
   6  13   1    1.00    0.40
   7 -13   1    8.00    0.80
  -7 -13  -1    8.40    0.80
   7 -13   1    8.90    0.70
  -7 -13  -1    9.30    0.80
   7 -13   1    9.60    0.80
   7 -13   1    8.60    0.70
   7  13   1    8.00    0.80
   7  13   1    8.50    0.70
   7  13   1    8.20    0.80
   7  13   1    7.70    0.80
  -7  13  -1    8.10    0.70
  -7  13  -1    9.30    0.80
  -8 -13  -1    0.70    0.50
  -8 -13  -1    0.20    0.50
   8 -13   1    0.00    0.50
   8 -13   1   -0.30    0.50
   8 -13   1   -0.10    0.40
  -8  13  -1    0.10    0.50
   8  13   1    0.70    0.60
  -8  13  -1   -0.50    0.40
   8  13   1   -0.70    0.50
   8  13   1   -0.50    0.40
   8  13   1   -0.20    0.50
   9 -13   1    1.40    0.60
  -9 -13  -1    1.20    0.60
  -9 -13  -1    1.80    0.60
   9 -13   1    1.60    0.60
  -9  13  -1    0.60    0.50
   9  13   1    1.10    0.70
   9  13   1    2.20    0.60
   9  13   1    0.40    0.50
   9  13   1    1.70    0.60
  -9  13  -1    1.30    0.60
  10 -13   1    4.80    0.90
  10 -13   1    4.40    0.80
 -10 -13  -1    4.60    0.70
 -10  13  -1    3.70    0.70
  10  13   1    4.90    0.80
  10  13   1    4.70    0.80
  10  13   1    4.30    0.80
 -10  13  -1    5.10    0.80
  10  13   1    5.90    0.80
  11 -13   1    0.20    0.70
  11 -13   1   -0.10    0.70
 -11  13  -1   -0.40    0.60
  11  13   1   -0.30    0.60
 -11  13  -1   -1.00    0.60
  11  13   1    1.10    0.80
  12 -13   1    1.30    0.80
  12  13   1    1.60    0.70
  12  13   1    1.40    0.90
 -12  13  -1    2.50    0.70
  13 -13   1    1.80    0.90
  13  13   1    0.50    0.80
  13  13   1    1.70    0.80
 -13  13  -1    0.90    0.70
  13 -14  -1    0.10    0.80
  13  14  -1   -0.10    0.90
  13  14  -1   -0.10    0.80
 -13  14   1    0.10    0.60
  12 -14  -1    0.30    0.80
 -12 -14   1    0.20    0.60
  12 -14  -1   -0.50    0.70
  12  14  -1    0.30    0.80
  12  14  -1   -0.50    0.60
 -12  14   1    0.60    0.60
 -12  14   1    0.40    0.70
  11 -14  -1    0.10    0.70
  11 -14  -1    2.00    0.70
 -11 -14   1    2.50    0.70
 -11  14   1    0.20    0.50
  11  14  -1    1.60    0.70
 -11  14   1    0.00    0.60
  11  14  -1   -0.60    0.70
  10 -14  -1   10.60    1.10
 -10 -14   1   11.30    1.00
 -10 -14   1   11.40    1.00
  10 -14  -1    9.00    1.00
  10  14  -1   11.10    1.10
  10  14  -1   10.40    1.00
 -10  14   1   10.70    0.90
 -10  14   1   10.50    1.00
   9 -14  -1    1.50    0.60
  -9 -14   1    1.50    0.50
   9 -14  -1    2.30    0.70
  -9 -14   1    2.10    0.60
  -9  14   1    2.70    0.50
   9  14  -1    3.00    0.70
  -9  14   1    2.00    0.60
   9  14  -1    2.40    0.70
   9  14  -1    1.70    0.60
   8 -14  -1    5.50    0.80
   8 -14  -1    6.40    0.80
  -8 -14   1    5.70    0.70
  -8 -14   1    5.10    0.70
  -8  14   1    5.50    0.70
   8  14  -1    4.70    0.70
  -8  14   1    5.00    0.60
   8  14  -1    5.00    0.70
   8  14  -1    4.90    0.70
  -7 -14   1    5.10    0.70
   7 -14  -1    5.10    0.50
   7 -14  -1    5.30    0.70
  -7 -14   1    5.10    0.60
   7 -14  -1    4.40    0.60
   7  14  -1    4.40    0.60
  -7  14   1    6.30    0.60
   7  14  -1    4.70    0.60
   7  14  -1    4.60    0.70
  -7  14   1    4.70    0.50
  -6 -14   1   23.00    1.10
  -6 -14   1   20.90    1.20
  -6 -14   1   21.90    1.10
   6 -14  -1   21.70    1.10
   6 -14  -1   22.10    1.20
   6 -14  -1   23.50    1.20
   6  14  -1   22.20    1.20
   6  14  -1   22.90    1.10
   6  14  -1   23.10    1.30
   6  14  -1   21.50    1.20
  -6  14   1   23.10    1.10
   5 -14  -1    3.30    0.50
  -5 -14   1    3.70    0.50
  -5 -14   1    2.80    0.40
   5 -14  -1    2.60    0.40
  -5 -14   1    2.70    0.50
   5 -14  -1    3.30    0.40
   5  14  -1    3.00    0.50
   5  14  -1    3.80    0.60
   5  14  -1    2.70    0.50
  -5  14   1    3.30    0.40
   5  14  -1    2.70    0.50
  -5  14   1    3.00    0.50
  -5  14   1    2.60    0.40
   4 -14  -1    8.80    0.60
  -4 -14   1    9.50    0.70
   4 -14  -1    8.40    0.60
   4 -14  -1    9.20    0.70
  -4 -14   1    9.10    0.60
  -4 -14   1    7.80    0.60
   4  14  -1    8.90    0.70
   4  14  -1    8.80    0.70
  -4  14   1    8.70    0.50
  -4  14   1    8.60    0.60
  -4  14   1    7.90    0.70
   4  14  -1    8.60    0.70
   4  14  -1    8.40    0.70
   3 -14  -1    9.30    0.70
   3 -14  -1    8.70    0.60
  -3 -14   1    9.40    0.60
  -3 -14   1    9.30    0.70
   3 -14  -1    9.10    0.40
   3 -14  -1    7.60    0.60
  -3 -14   1    9.30    0.60
   3  14  -1    8.80    0.70
   3  14  -1    7.90    0.60
  -3  14   1    8.10    0.70
   3  14  -1    8.60    0.60
  -3  14   1    8.10    0.60
  -3  14   1    8.90    0.50
   3  14  -1   10.10    0.80
  -2 -14   1   56.59    2.30
   2 -14  -1   59.19    2.00
  -2 -14   1   58.49    2.00
   2 -14  -1   59.09    2.20
  -2 -14   1   59.39    2.00
  -2  14   1   57.99    2.10
   2  14  -1   56.59    2.00
  -2  14   1   60.59    2.00
   2  14  -1   56.89    2.10
  -2  14   1   62.79    1.90
   2  14  -1   55.59    2.00
  -2  14   1   59.39    2.00
   2  14  -1   59.19    2.00
   2  14  -1   57.49    2.20
   1 -14  -1  493.75   16.30
   1 -14  -1  495.25   14.70
  -1 -14   1  479.65   15.00
  -1 -14   1  482.55   14.70
  -1  14   1  517.15   14.70
   1  14  -1  503.35   16.10
   1  14  -1  501.85   15.90
   1  14  -1  470.85   14.70
  -1  14   1  506.45   15.00
  -1  14   1  485.85   15.10
   1  14  -1  482.75   15.00
   1  14  -1  485.25   15.10
  -1  14   1  482.45   15.00
   0 -14   1   66.09    2.30
   0 -14  -1   66.49    2.50
   0 -14   1   68.39    2.20
   0 -14   1   64.19    2.50
   0 -14  -1   70.89    2.20
   0 -14   1   65.79    2.20
   0  14   1   64.19    2.20
   0  14  -1   67.89    2.30
   0  14  -1   67.19    2.40
   0  14   1   64.89    2.30
   0  14   1   70.09    2.10
   0  14  -1   63.39    2.30
   0  14  -1   63.59    2.20
  -1 -14  -1  105.69    3.80
   1 -14   1  109.69    3.50
  -1 -14  -1  109.19    3.40
   1 -14   1  111.89    3.80
   1 -14   1  109.59    3.50
   1 -14   1  107.79    3.40
  -1  14  -1  108.19    3.80
   1  14   1  101.69    3.50
  -1  14  -1  104.19    3.50
  -1  14  -1  103.79    3.40
  -1  14  -1  116.19    3.50
  -1  14  -1  103.89    3.50
   1  14   1  107.59    3.50
   1  14   1  111.09    3.40
   2 -14   1   38.80    1.40
  -2 -14  -1   39.60    1.40
   2 -14   1   39.90    1.40
  -2 -14  -1   35.80    1.60
   2 -14   1   37.70    1.50
   2 -14   1   37.80    1.60
   2 -14   1   38.50    1.40
   2 -14   1   37.60    1.40
   2  14   1   37.60    1.50
   2  14   1   38.70    1.40
   2  14   1   41.10    1.40
  -2  14  -1   40.00    1.40
  -2  14  -1   38.70    1.40
  -2  14  -1   37.40    1.50
  -2  14  -1   40.10    1.60
  -2  14  -1   39.90    1.50
   2  14   1   37.20    1.40
   3 -14   1  128.19    4.00
   3 -14   1  121.89    4.10
  -3 -14  -1  120.99    4.40
   3 -14   1  124.89    4.00
   3 -14   1  125.99    4.40
   3 -14   1  125.69    4.00
  -3 -14  -1  127.79    4.00
   3 -14   1  126.69    4.10
  -3 -14  -1  129.09    4.00
   3  14   1  127.99    4.40
  -3  14  -1  121.89    4.10
  -3  14  -1  125.69    4.40
   3  14   1  120.59    3.90
   3  14   1  133.19    4.00
  -3  14  -1  134.69    4.10
   3  14   1  124.59    4.10
  -3  14  -1  120.79    4.00
   3  14   1  122.69    4.10
  -3  14  -1  128.19    4.10
  -4 -14  -1    8.70    0.60
   4 -14   1    9.20    0.40
   4 -14   1    8.80    0.60
  -4 -14  -1    9.00    0.80
   4 -14   1    8.20    0.60
  -4 -14  -1    9.10    0.60
   4 -14   1    8.40    0.70
   4 -14   1    8.30    0.70
   4 -14   1    9.20    0.60
   4  14   1    8.90    0.70
  -4  14  -1    8.50    0.60
   4  14   1    8.40    0.70
   4  14   1    8.50    0.70
   4  14   1    8.60    0.60
  -4  14  -1    8.30    0.60
   4  14   1    7.70    0.60
  -4  14  -1    8.30    0.70
  -4  14  -1    8.90    0.70
  -5 -14  -1   -0.20    0.40
   5 -14   1   -0.20    0.30
  -5 -14  -1    0.20    0.30
   5 -14   1    0.20    0.30
   5 -14   1    0.10    0.30
   5 -14   1   -0.10    0.40
  -5 -14  -1    0.60    0.30
  -5  14  -1    0.20    0.40
   5  14   1   -0.10    0.40
  -5  14  -1    1.00    0.40
  -5  14  -1    0.50    0.30
   5  14   1    0.50    0.30
   5  14   1    0.00    0.40
   5  14   1   -0.10    0.40
  -6 -14  -1   31.70    1.50
   6 -14   1   31.90    1.40
   6 -14   1   32.00    1.40
   6 -14   1   31.20    1.50
  -6 -14  -1   30.70    1.40
   6 -14   1   32.30    1.40
   6  14   1   31.70    1.40
  -6  14  -1   31.60    1.30
   6  14   1   30.60    1.30
   6  14   1   30.40    1.50
  -6  14  -1   30.30    1.40
   7 -14   1    4.10    0.60
  -7 -14  -1    3.20    0.50
   7 -14   1    2.40    0.60
   7 -14   1    3.00    0.60
  -7 -14  -1    3.10    0.60
   7 -14   1    2.40    0.50
  -7  14  -1    3.00    0.50
   7  14   1    3.10    0.60
   7  14   1    3.30    0.60
   7  14   1    3.50    0.60
   7  14   1    2.70    0.50
  -7  14  -1    3.60    0.60
   8 -14   1   11.30    1.00
  -8 -14  -1   12.20    0.90
  -8 -14  -1   13.70    1.00
   8 -14   1   13.10    0.90
   8 -14   1   13.50    1.00
   8  14   1   12.90    1.00
   8  14   1   10.70    0.90
  -8  14  -1   14.00    1.00
   8  14   1   11.80    1.00
  -8  14  -1   12.80    0.90
   8  14   1   12.20    1.00
   9 -14   1   22.20    1.30
  -9 -14  -1   23.90    1.30
   9 -14   1   19.80    1.50
   9  14   1   24.80    1.40
  -9  14  -1   20.60    1.20
   9  14   1   22.10    1.30
   9  14   1   19.30    1.30
  -9  14  -1   18.80    1.30
   9  14   1   21.80    1.30
  10 -14   1    7.00    0.90
 -10 -14  -1    7.90    0.90
  10 -14   1    7.40    1.00
 -10  14  -1    6.90    0.80
  10  14   1    8.30    0.90
  10  14   1    6.80    0.90
 -10  14  -1    7.70    0.90
  10  14   1    6.90    1.00
  11 -14   1    2.40    0.80
  11 -14   1    1.10    0.70
 -11  14  -1    0.90    0.60
  11  14   1    0.10    0.60
 -11  14  -1    0.60    0.70
  11  14   1    0.40    0.80
  12 -14   1    1.80    0.80
  12  14   1   -0.60    0.80
  12  14   1    0.50    0.70
 -12  14  -1   -0.30    0.60
  13 -14   1    0.30    0.80
 -13  14  -1    0.60    0.70
  13  14   1    0.70    0.80
  13  14   1   -0.50    0.90
  13 -15  -1    1.10    0.90
  13 -15  -1    0.30    0.90
  13  15  -1    0.90    0.90
 -13  15   1    0.10    0.60
  13  15  -1    0.90    0.80
  12 -15  -1   -0.10    0.80
  12 -15  -1    0.40    0.80
 -12  15   1    0.70    0.60
  12  15  -1    0.20    0.80
 -12  15   1    0.30    0.70
  12  15  -1   -0.80    0.60
  11 -15  -1    0.30    0.70
  11 -15  -1    1.00    0.70
 -11 -15   1    0.80    0.60
 -11  15   1    0.50    0.50
  11  15  -1    0.10    0.70
  11  15  -1    0.20    0.60
 -11  15   1    0.70    0.70
 -10 -15   1   -0.20    0.50
  10 -15  -1    0.70    0.70
  10 -15  -1    1.00    0.70
 -10 -15   1    0.70    0.60
 -10  15   1   -0.10    0.50
  10  15  -1    0.50    0.70
 -10  15   1   -1.30    0.50
  10  15  -1    0.00    0.60
   9 -15  -1    5.00    0.80
   9 -15  -1    4.80    0.80
  -9 -15   1    4.70    0.70
  -9 -15   1    5.00    0.70
   9  15  -1    4.80    0.70
  -9  15   1    5.80    0.80
  -9  15   1    3.60    0.60
   9  15  -1    6.60    0.90
   9  15  -1    5.40    0.80
  -8 -15   1    1.10    0.50
  -8 -15   1    0.60    0.50
   8 -15  -1    0.40    0.60
   8 -15  -1    0.30    0.50
  -8  15   1    0.80    0.50
   8  15  -1   -0.10    0.50
   8  15  -1    1.00    0.60
   8  15  -1    1.90    0.60
  -8  15   1    0.70    0.40
  -7 -15   1   22.40    1.30
  -7 -15   1   23.90    1.20
   7 -15  -1   24.90    1.20
   7 -15  -1   24.40    1.40
   7 -15  -1   22.70    1.30
   7  15  -1   24.50    1.30
  -7  15   1   23.00    1.10
   7  15  -1   22.70    1.20
  -7  15   1   21.20    1.20
   7  15  -1   24.80    1.30
   6 -15  -1  116.39    4.00
  -6 -15   1  121.09    4.30
  -6 -15   1  122.19    3.90
   6 -15  -1  122.99    4.20
   6 -15  -1  119.39    4.30
  -6  15   1  118.79    3.90
   6  15  -1  121.09    4.00
   6  15  -1  112.99    4.00
   6  15  -1  112.29    3.90
  -5 -15   1    2.20    0.40
  -5 -15   1    2.60    0.40
  -5 -15   1    2.30    0.50
   5 -15  -1    2.10    0.50
   5 -15  -1    2.10    0.40
   5 -15  -1    2.20    0.40
  -5  15   1    2.10    0.40
  -5  15   1    2.70    0.40
   5  15  -1    2.30    0.50
  -5  15   1    2.40    0.50
   5  15  -1    1.50    0.50
   5  15  -1    1.50    0.40
   5  15  -1    2.60    0.50
   4 -15  -1    1.70    0.30
  -4 -15   1    1.20    0.40
   4 -15  -1    1.40    0.40
  -4 -15   1    0.90    0.30
  -4 -15   1    0.70    0.30
   4 -15  -1    0.90    0.40
   4  15  -1    0.60    0.30
  -4  15   1    1.10    0.40
   4  15  -1    0.40    0.40
  -4  15   1    0.90    0.40
  -4  15   1    0.80    0.30
   4  15  -1    0.80    0.40
   4  15  -1    1.10    0.40
  -3 -15   1    3.00    0.40
   3 -15  -1    2.10    0.40
   3 -15  -1    3.40    0.30
  -3 -15   1    2.40    0.40
   3 -15  -1    3.40    0.40
   3 -15  -1    3.00    0.40
  -3 -15   1    3.10    0.50
  -3  15   1    3.10    0.30
  -3  15   1    2.70    0.40
   3  15  -1    2.80    0.40
   3  15  -1    3.30    0.50
  -3  15   1    1.70    0.20
   3  15  -1    2.20    0.40
  -3  15   1    2.90    0.40
   3  15  -1    3.90    0.50
   3  15  -1    3.60    0.30
  -2 -15   1    8.80    0.60
  -2 -15   1    8.80    0.70
   2 -15  -1   10.10    0.60
   2 -15  -1   10.00    0.70
  -2 -15   1    9.30    0.60
   2  15  -1    8.20    0.70
  -2  15   1    9.70    0.60
  -2  15   1    9.40    0.50
   2  15  -1    9.60    0.40
   2  15  -1    6.40    0.60
  -2  15   1    6.90    0.50
   2  15  -1    8.30    0.60
   2  15  -1    8.90    0.60
  -2  15   1    8.70    0.70
   1 -15  -1   20.40    1.00
   1 -15  -1   19.70    0.90
  -1 -15   1   20.10    0.90
  -1 -15   1   19.30    0.90
  -1  15   1   21.40    0.80
  -1  15   1   21.70    1.00
   1  15  -1   22.70    1.10
   1  15  -1   20.40    0.90
   1  15  -1   20.80    0.90
   1  15  -1   18.30    0.90
  -1  15   1   21.50    0.90
   0 -15   1   74.79    2.60
   0 -15   1   75.59    2.50
   0 -15  -1   74.39    2.80
   0 -15   1   75.99    2.50
   0 -15  -1   79.99    2.50
   0 -15   1   75.99    2.90
   0  15   1   75.29    2.50
   0  15  -1   75.69    2.60
   0  15   1   82.29    2.50
   0  15   1   74.19    2.60
   0  15  -1   75.69    2.60
   0  15  -1   77.99    2.80
   0  15  -1   75.89    2.50
   1 -15   1  125.29    4.30
   1 -15   1  119.19    3.80
   1 -15   1  121.49    3.80
  -1 -15  -1  119.79    3.80
  -1 -15  -1  114.19    4.20
   1 -15   1  123.29    3.90
  -1  15  -1  121.19    3.80
   1  15   1  120.29    3.90
  -1  15  -1  118.79    3.80
  -1  15  -1  120.69    4.20
   1  15   1  124.69    3.70
  -1  15  -1  114.39    3.90
   1  15   1  114.59    3.90
  -1  15  -1  119.79    3.90
   2 -15   1   31.90    1.20
   2 -15   1   30.00    1.30
   2 -15   1   32.70    1.20
   2 -15   1   30.40    1.40
   2 -15   1   30.90    1.20
  -2 -15  -1   30.40    1.20
   2 -15   1   30.40    1.20
  -2 -15  -1   26.80    1.30
   2  15   1   30.30    1.30
  -2  15  -1   33.20    1.20
  -2  15  -1   32.20    1.20
   2  15   1   32.50    1.20
  -2  15  -1   31.90    1.30
   2  15   1   29.80    1.20
  -2  15  -1   29.90    1.20
  -2  15  -1   32.50    1.40
   2  15   1   31.70    1.20
  -3 -15  -1    7.50    0.50
  -3 -15  -1    6.20    0.50
   3 -15   1    6.90    0.40
   3 -15   1    7.10    0.50
   3 -15   1    7.20    0.60
   3 -15   1    6.70    0.50
   3 -15   1    6.10    0.60
   3 -15   1    6.60    0.60
  -3 -15  -1    6.40    0.70
   3  15   1    7.80    0.50
   3  15   1    7.20    0.60
  -3  15  -1    6.20    0.50
   3  15   1    8.20    0.60
  -3  15  -1    6.40    0.60
  -3  15  -1    6.10    0.50
  -3  15  -1    6.30    0.50
  -3  15  -1    6.70    0.60
   3  15   1    6.20    0.50
   3  15   1    6.30    0.60
  -4 -15  -1   15.80    0.80
  -4 -15  -1   15.60    0.90
   4 -15   1   14.60    0.80
  -4 -15  -1   15.20    0.80
   4 -15   1   15.60    0.80
   4 -15   1   15.90    0.80
   4 -15   1   14.90    0.90
   4 -15   1   15.40    0.60
   4 -15   1   16.30    0.90
   4  15   1   14.60    0.80
  -4  15  -1   15.90    0.80
  -4  15  -1   15.70    0.80
  -4  15  -1   14.90    0.90
   4  15   1   16.10    0.90
   4  15   1   16.80    0.80
   4  15   1   14.20    0.90
  -4  15  -1   15.70    0.80
   4  15   1   17.40    0.90
  -4  15  -1   14.10    0.90
   5 -15   1   49.10    1.80
  -5 -15  -1   49.80    1.80
   5 -15   1   48.00    1.90
  -5 -15  -1   46.90    2.00
   5 -15   1   47.10    1.90
   5  15   1   48.20    1.90
   5  15   1   47.30    1.80
   5  15   1   49.00    1.80
  -5  15  -1   46.50    1.80
  -5  15  -1   48.30    1.80
   6 -15   1    2.90    0.60
  -6 -15  -1    3.00    0.60
   6 -15   1    3.30    0.50
   6 -15   1    3.30    0.60
   6 -15   1    2.90    0.50
  -6 -15  -1    4.30    0.50
  -6  15  -1    3.70    0.50
   6  15   1    3.80    0.70
  -6  15  -1    3.10    0.50
   6  15   1    4.10    0.60
   6  15   1    3.80    0.50
  -7 -15  -1   57.09    2.20
   7 -15   1   57.59    2.30
  -7 -15  -1   58.09    2.40
   7 -15   1   56.89    2.40
   7 -15   1   56.19    2.30
  -7  15  -1   54.59    2.10
   7  15   1   56.49    2.30
   7  15   1   55.79    2.10
  -7  15  -1   59.69    2.20
   7  15   1   58.29    2.20
  -8 -15  -1    3.30    0.70
   8 -15   1    2.70    0.70
   8 -15   1    3.40    0.70
   8  15   1    3.20    0.70
   8  15   1    4.00    0.60
   8  15   1    4.40    0.80
  -8  15  -1    2.50    0.60
  -8  15  -1    2.60    0.60
  -9 -15  -1    1.10    0.60
   9 -15   1    2.00    0.70
   9 -15   1    1.90    0.60
   9  15   1    0.90    0.70
  -9  15  -1    2.50    0.60
   9  15   1    2.10    0.60
   9  15   1    2.30    0.70
  -9  15  -1    2.50    0.60
  10 -15   1    1.10    0.70
 -10 -15  -1    0.90    0.60
  10 -15   1    0.60    0.70
  10  15   1    0.70    0.60
 -10  15  -1    0.50    0.60
  10  15   1    0.00    0.70
 -10  15  -1    0.10    0.50
  11 -15   1    2.10    0.70
  11 -15   1    1.70    0.80
  11  15   1    2.30    0.70
 -11  15  -1    0.90    0.60
 -11  15  -1    1.50    0.70
  11  15   1    0.20    0.80
  12 -15   1    0.30    0.80
 -12  15  -1    0.10    0.60
  12  15   1    1.20    0.70
  12  15   1   -0.10    0.90
  13 -15   1    0.80    0.90
  13  15   1   -0.20    0.90
 -13  15  -1   -0.40    0.70
  13  15   1    1.30    0.80
  13 -16  -1    0.90    0.90
  13 -16  -1    1.50    1.00
 -13  16   1    0.50    0.60
  13  16  -1   -0.20    0.80
  13  16  -1   -0.30    0.80
  12 -16  -1    2.50    0.90
  12 -16  -1    2.80    0.80
 -12  16   1    1.80    0.60
 -12  16   1    1.60    0.80
  12  16  -1    1.20    0.80
  12  16  -1    1.20    0.70
  11 -16  -1    0.30    0.70
  11 -16  -1   -0.40    0.70
 -11  16   1   -0.70    0.50
  11  16  -1    0.40    0.60
  11  16  -1    0.00    0.80
 -11  16   1    0.80    0.70
  10 -16  -1   17.80    1.50
  10 -16  -1   19.30    1.40
 -10 -16   1   20.80    1.30
 -10 -16   1   19.90    1.30
 -10  16   1   16.40    1.20
 -10  16   1   19.60    1.10
  10  16  -1   16.00    1.40
  10  16  -1   17.30    1.30
   9 -16  -1    0.10    0.60
   9 -16  -1    0.40    0.60
  -9 -16   1    0.60    0.50
  -9 -16   1    0.10    0.50
  -9  16   1    0.20    0.60
   9  16  -1    0.50    0.60
  -9  16   1    0.50    0.40
   9  16  -1    1.90    0.60
   9  16  -1    0.70    0.60
   8 -16  -1    4.90    0.80
   8 -16  -1    4.20    0.70
  -8 -16   1    4.20    0.70
  -8 -16   1    3.80    0.70
   8  16  -1    2.60    0.70
  -8  16   1    3.70    0.60
   8  16  -1    5.10    0.70
  -8  16   1    4.40    0.50
   8  16  -1    5.30    0.70
   7 -16  -1    9.80    0.90
   7 -16  -1   11.00    1.00
  -7 -16   1   11.20    0.90
  -7 -16   1   11.00    1.00
   7 -16  -1   10.40    0.80
   7  16  -1   12.30    1.00
   7  16  -1   11.80    0.90
  -7  16   1   12.20    0.80
   7  16  -1   10.80    0.90
  -7  16   1   11.60    0.90
   6 -16  -1    9.80    0.80
   6 -16  -1   11.80    0.90
   6 -16  -1    8.10    0.80
  -6 -16   1   11.40    0.90
  -6 -16   1   10.70    0.90
  -6  16   1   11.20    0.80
   6  16  -1    9.60    0.80
   6  16  -1    9.50    0.80
  -6  16   1    9.90    0.70
   6  16  -1    9.70    0.90
  -5 -16   1   49.70    2.10
   5 -16  -1   49.20    1.90
   5 -16  -1   46.50    1.90
  -5 -16   1   48.40    1.80
   5  16  -1   48.20    1.90
   5  16  -1   47.60    1.90
   5  16  -1   49.30    2.10
  -5  16   1   47.70    1.90
  -5  16   1   47.10    1.80
   5  16  -1   46.00    1.80
   4 -16  -1  126.69    4.30
  -4 -16   1  132.99    4.60
   4 -16  -1  127.89    4.50
  -4 -16   1  130.19    4.20
  -4 -16   1  125.49    4.10
   4 -16  -1  127.69    4.10
  -4  16   1  126.79    4.30
   4  16  -1  133.19    4.50
   4  16  -1  122.59    4.10
  -4  16   1  131.19    4.00
  -4  16   1  122.49    4.10
   4  16  -1  129.79    4.20
   4  16  -1  123.39    4.20
   3 -16  -1   -0.20    0.30
   3 -16  -1    0.10    0.20
  -3 -16   1    0.40    0.40
   3 -16  -1    0.10    0.40
  -3 -16   1    0.50    0.30
   3 -16  -1    0.00    0.30
  -3 -16   1    0.40    0.30
   3  16  -1    0.10    0.40
  -3  16   1    0.30    0.30
  -3  16   1    0.20    0.20
  -3  16   1    0.80    0.40
   3  16  -1    0.00    0.40
   3  16  -1    0.30    0.40
  -3  16   1   -0.10    0.20
   3  16  -1    0.30    0.30
  -2 -16   1   34.20    1.30
   2 -16  -1   33.30    1.30
  -2 -16   1   31.30    1.30
  -2 -16   1   33.30    1.50
   2 -16  -1   33.40    1.40
  -2  16   1   33.70    1.30
   2  16  -1   33.20    1.40
  -2  16   1   31.50    1.30
   2  16  -1   31.90    1.30
  -2  16   1   34.90    1.20
  -2  16   1   30.30    1.20
   2  16  -1   30.70    1.30
   2  16  -1   32.80    1.30
  -1 -16   1    7.90    0.50
  -1 -16   1    6.90    0.60
  -1 -16   1    8.30    0.60
   1 -16  -1    9.40    0.70
   1 -16  -1    7.60    0.60
   1  16  -1    8.50    0.60
  -1  16   1    7.50    0.50
   1  16  -1    7.20    0.60
  -1  16   1    7.60    0.60
   1  16  -1    8.20    0.60
  -1  16   1    6.90    0.40
   1  16  -1    8.30    0.70
  -1  16   1    8.70    0.70
   0 -16   1   30.00    1.20
   0 -16   1   28.70    1.20
   0 -16   1   28.10    1.40
   0 -16  -1   29.90    1.40
   0 -16   1   30.90    1.20
   0 -16  -1   30.20    1.20
   0  16  -1   31.30    1.40
   0  16  -1   30.30    1.30
   0  16  -1   30.60    1.20
   0  16   1   29.60    1.20
   0  16  -1   31.90    1.20
   0  16   1   29.20    1.30
   0  16   1   32.00    1.10
   0  16  -1   29.30    1.20
   1 -16   1   53.99    1.90
   1 -16   1   55.89    2.20
   1 -16   1   56.59    1.90
   1 -16   1   56.99    2.00
  -1 -16  -1   52.49    2.20
  -1 -16  -1   55.69    1.90
   1  16   1   54.09    2.00
   1  16   1   55.39    2.00
  -1  16  -1   56.09    1.90
  -1  16  -1   57.79    2.10
  -1  16  -1   56.09    2.00
  -1  16  -1   53.79    2.00
   1  16   1   58.49    1.90
  -1  16  -1   51.99    1.90
  -2 -16  -1    0.20    0.20
   2 -16   1   -0.10    0.20
   2 -16   1   -0.40    0.20
   2 -16   1   -0.10    0.20
  -2 -16  -1   -0.10    0.30
   2 -16   1   -0.30    0.30
   2 -16   1    0.20    0.30
   2 -16   1   -0.20    0.30
   2  16   1   -0.60    0.30
  -2  16  -1    0.40    0.30
   2  16   1    0.00    0.20
  -2  16  -1   -0.30    0.30
   2  16   1   -0.20    0.40
  -2  16  -1    0.00    0.30
   2  16   1    0.10    0.20
  -2  16  -1    0.00    0.30
  -2  16  -1   -0.20    0.20
   3 -16   1   38.40    1.60
   3 -16   1   34.60    1.50
   3 -16   1   38.70    1.50
  -3 -16  -1   39.80    1.70
   3 -16   1   38.80    1.40
  -3 -16  -1   38.20    1.40
   3 -16   1   37.30    1.50
  -3 -16  -1   38.30    1.50
   3 -16   1   38.10    1.40
   3  16   1   36.80    1.60
  -3  16  -1   36.70    1.50
   3  16   1   37.90    1.40
  -3  16  -1   38.20    1.50
  -3  16  -1   37.10    1.40
  -3  16  -1   38.50    1.40
   3  16   1   38.50    1.50
   3  16   1   37.30    1.60
  -3  16  -1   37.50    1.60
   3  16   1   40.60    1.40
  -4 -16  -1    3.50    0.50
   4 -16   1    4.30    0.50
   4 -16   1    4.10    0.50
   4 -16   1    4.20    0.50
  -4 -16  -1    4.40    0.50
   4 -16   1    4.00    0.30
  -4  16  -1    3.70    0.50
  -4  16  -1    4.30    0.50
   4  16   1    4.20    0.50
  -4  16  -1    4.30    0.50
   4  16   1    3.80    0.40
   4  16   1    5.30    0.60
   5 -16   1    5.40    0.60
   5 -16   1    6.40    0.60
  -5 -16  -1    5.40    0.60
   5 -16   1    6.10    0.60
  -5 -16  -1    5.50    0.60
  -5  16  -1    3.70    0.50
   5  16   1    4.80    0.70
   5  16   1    4.70    0.50
  -5  16  -1    5.30    0.60
   5  16   1    4.50    0.60
   6 -16   1   11.60    0.90
  -6 -16  -1   10.60    0.80
   6 -16   1   10.70    0.80
   6 -16   1    7.90    0.80
  -6 -16  -1    9.90    0.90
   6  16   1   11.10    0.90
  -6  16  -1   10.30    0.80
  -6  16  -1   10.50    0.80
   6  16   1   10.90    0.90
   6  16   1   10.00    0.70
   7 -16   1    2.80    0.60
   7 -16   1    3.10    0.70
   7 -16   1    2.70    0.60
  -7 -16  -1    3.50    0.60
  -7  16  -1    4.30    0.60
   7  16   1    3.70    0.60
   7  16   1    4.80    0.70
   7  16   1    2.70    0.60
  -7  16  -1    2.20    0.60
   8 -16   1   -0.10    0.50
   8 -16   1    0.60    0.60
  -8 -16  -1   -0.40    0.50
  -8  16  -1    0.10    0.50
   8  16   1    0.10    0.50
   8  16   1   -0.80    0.60
   8  16   1   -0.10    0.50
  -8  16  -1    0.80    0.50
   9 -16   1    0.40    0.60
  -9 -16  -1    0.70    0.60
   9 -16   1    1.00    0.60
  -9  16  -1   -0.50    0.50
   9  16   1    1.10    0.60
   9  16   1   -0.60    0.50
  -9  16  -1    0.90    0.50
   9  16   1   -0.60    0.70
 -10 -16  -1    4.00    0.80
  10 -16   1    5.00    0.80
  10 -16   1    3.40    0.90
 -10  16  -1    5.20    0.80
  10  16   1    4.10    0.90
 -10  16  -1    5.50    0.80
  10  16   1    4.60    0.70
  11 -16   1    0.90    0.70
  11 -16   1   -0.30    0.70
 -11  16  -1    0.00    0.60
  11  16   1   -0.20    0.60
 -11  16  -1   -0.10    0.60
  11  16   1   -0.70    0.60
  12 -16   1    3.50    1.00
  12  16   1    3.10    1.00
 -12  16  -1    3.10    0.80
  12  16   1    2.20    0.80
  13 -16   1    1.20    0.90
  13  16   1   -0.10    0.90
  13  16   1   -0.40    0.70
 -13  16  -1   -0.50    0.70
  13 -17  -1    0.90    1.00
  13 -17  -1    0.50    0.90
  13  17  -1    0.70    1.00
  13  17  -1    0.60    0.80
 -13  17   1   -0.20    0.60
  12 -17  -1   -0.10    0.80
  12 -17  -1   -0.20    0.80
  12  17  -1    0.00    0.80
  12  17  -1   -0.30    0.70
 -12  17   1    0.00    0.50
 -12  17   1    0.50    0.80
  11 -17  -1    0.70    0.70
  11 -17  -1    0.30    0.70
  11  17  -1    0.10    0.80
  11  17  -1    0.00    0.60
 -11  17   1    0.40    0.50
 -11  17   1    0.70    0.70
  10 -17  -1   -0.10    0.60
  10 -17  -1   -0.30    0.60
 -10 -17   1    0.60    0.50
  10  17  -1   -0.30    0.60
 -10  17   1    1.10    0.50
 -10  17   1    0.80    0.60
  10  17  -1    0.30    0.60
   9 -17  -1   30.30    1.70
  -9 -17   1   27.80    1.60
   9 -17  -1   28.90    1.60
   9  17  -1   31.40    1.60
  -9  17   1   31.20    1.40
   9  17  -1   30.00    1.50
   9  17  -1   31.30    1.70
  -9  17   1   30.40    1.50
  -8 -17   1    2.50    0.60
   8 -17  -1    3.70    0.70
  -8 -17   1    2.10    0.60
   8 -17  -1    1.60    0.70
  -8  17   1    1.70    0.50
   8  17  -1    2.90    0.70
  -8  17   1    2.10    0.60
   8  17  -1    2.90    0.70
   8  17  -1    1.60    0.60
   7 -17  -1   38.20    1.90
   7 -17  -1   41.30    1.80
  -7 -17   1   40.00    1.70
   7 -17  -1   38.00    1.70
  -7 -17   1   39.80    1.90
  -7  17   1   38.20    1.50
   7  17  -1   40.10    1.80
  -7  17   1   38.60    1.70
   7  17  -1   37.40    1.80
   7  17  -1   37.70    1.70
   6 -17  -1   12.10    0.90
  -6 -17   1    9.10    0.90
  -6 -17   1   12.10    0.90
   6 -17  -1   11.30    0.90
   6 -17  -1   11.50    0.90
   6  17  -1   12.40    0.90
  -6  17   1   11.20    0.70
   6  17  -1   10.50    0.90
  -6  17   1   12.50    0.80
   6  17  -1   11.20    0.90
   5 -17  -1    6.40    0.60
  -5 -17   1    6.40    0.70
   5 -17  -1    6.10    0.70
  -5 -17   1    6.30    0.60
  -5  17   1    6.40    0.70
   5  17  -1    6.30    0.70
   5  17  -1    6.00    0.60
   5  17  -1    7.20    0.70
  -5  17   1    6.70    0.60
  -4 -17   1   21.10    1.10
   4 -17  -1   21.20    1.10
   4 -17  -1   24.70    1.10
  -4 -17   1   21.40    1.20
   4  17  -1   21.40    1.10
   4  17  -1   21.90    1.00
  -4  17   1   22.00    1.00
  -4  17   1   22.10    0.90
   4  17  -1   22.10    1.10
   4  17  -1   22.90    1.20
  -4  17   1   21.90    1.10
   3 -17  -1   45.20    1.90
  -3 -17   1   44.50    1.70
   3 -17  -1   45.60    1.60
   3 -17  -1   47.70    1.70
  -3 -17   1   44.10    1.70
   3 -17  -1   42.10    1.80
  -3 -17   1   42.60    1.90
  -3  17   1   43.20    1.80
   3  17  -1   45.50    1.70
  -3  17   1   44.40    1.70
  -3  17   1   46.80    1.60
   3  17  -1   45.70    1.90
   3  17  -1   43.60    1.70
   3  17  -1   46.30    1.80
  -2 -17   1    0.30    0.30
   2 -17  -1    0.40    0.40
  -2 -17   1    0.30    0.30
  -2 -17   1    0.30    0.30
   2 -17  -1    0.40    0.30
   2  17  -1    0.10    0.30
   2  17  -1    0.00    0.40
  -2  17   1    0.00    0.20
  -2  17   1    0.40    0.30
   2  17  -1    0.30    0.40
  -2  17   1    0.30    0.20
  -2  17   1    0.70    0.40
   2  17  -1    0.90    0.40
   1 -17  -1   57.69    2.00
  -1 -17   1   50.59    2.20
  -1 -17   1   57.59    2.00
  -1 -17   1   57.89    2.00
   1 -17  -1   56.89    2.20
  -1  17   1   54.69    2.00
   1  17  -1   55.89    2.00
  -1  17   1   53.39    1.90
   1  17  -1   55.59    2.00
  -1  17   1   55.09    2.10
  -1  17   1   62.09    1.90
   1  17  -1   56.99    2.10
   1  17  -1   59.79    2.20
   0 -17   1    1.70    0.40
   0 -17   1    1.40    0.30
   0 -17  -1    1.50    0.50
   0 -17  -1    1.20    0.30
   0 -17   1    1.20    0.30
   0 -17   1    1.40    0.40
   0  17   1    1.30    0.30
   0  17   1    0.90    0.40
   0  17  -1    0.60    0.40
   0  17  -1    1.30    0.40
   0  17  -1    1.10    0.30
   0  17  -1    1.40    0.40
   0  17  -1    1.00    0.30
   0  17   1    0.50    0.20
   0  17   1    1.00    0.30
   1 -17   1    2.80    0.50
  -1 -17  -1    3.10    0.40
   1 -17   1    3.40    0.40
   1 -17   1    3.50    0.40
  -1 -17  -1    3.50    0.60
   1 -17   1    3.10    0.40
  -1  17  -1    3.80    0.40
  -1  17  -1    4.20    0.50
   1  17   1    3.40    0.40
  -1  17  -1    3.90    0.40
  -1  17  -1    3.50    0.50
   1  17   1    2.30    0.40
  -1  17  -1    3.10    0.50
   1  17   1    4.10    0.50
   2 -17   1   36.00    1.50
   2 -17   1   37.30    1.40
   2 -17   1   35.60    1.60
   2 -17   1   36.60    1.40
  -2 -17  -1   37.30    1.40
   2 -17   1   35.90    1.40
   2 -17   1   35.70    1.40
  -2  17  -1   36.60    1.50
   2  17   1   36.50    1.50
   2  17   1   37.90    1.40
  -2  17  -1   36.80    1.60
  -2  17  -1   36.90    1.40
  -2  17  -1   36.90    1.40
  -2  17  -1   38.90    1.40
   2  17   1   34.80    1.40
  -3 -17  -1    0.40    0.30
   3 -17   1    0.50    0.30
   3 -17   1    0.80    0.20
   3 -17   1    0.80    0.40
  -3 -17  -1   -0.30    0.40
   3 -17   1    0.00    0.40
   3  17   1    0.00    0.30
  -3  17  -1    0.80    0.30
   3  17   1    0.10    0.30
  -3  17  -1    0.40    0.40
  -3  17  -1    0.60    0.40
  -3  17  -1   -0.50    0.30
  -3  17  -1    0.40    0.30
   3  17   1    0.70    0.30
   3  17   1    0.20    0.40
  -4 -17  -1    5.30    0.60
   4 -17   1    7.00    0.60
   4 -17   1    5.90    0.60
  -4 -17  -1    6.20    0.60
   4 -17   1    6.00    0.60
  -4  17  -1    5.80    0.60
  -4  17  -1    5.00    0.50
   4  17   1    5.80    0.70
   4  17   1    6.60    0.60
  -4  17  -1    6.00    0.60
   4  17   1    5.10    0.50
   5 -17   1    2.60    0.50
  -5 -17  -1    2.30    0.50
   5 -17   1    4.10    0.60
  -5 -17  -1    2.60    0.50
   5 -17   1    2.60    0.50
   5  17   1    2.20    0.40
  -5  17  -1    2.10    0.50
   5  17   1    2.70    0.50
  -5  17  -1    2.50    0.40
  -5  17  -1    2.90    0.50
   5  17   1    2.70    0.50
   6 -17   1   10.40    0.90
   6 -17   1   12.00    1.00
   6 -17   1   11.90    0.90
  -6 -17  -1   10.40    0.90
  -6  17  -1   11.30    0.80
  -6  17  -1   12.60    0.90
   6  17   1   12.70    0.90
   6  17   1   11.50    1.00
   6  17   1   11.50    0.90
   7 -17   1   39.90    1.70
   7 -17   1   36.10    1.70
  -7 -17  -1   36.40    1.80
   7 -17   1   39.10    1.90
  -7  17  -1   37.50    1.60
   7  17   1   40.00    1.80
   7  17   1   39.00    1.80
   7  17   1   37.40    1.60
  -7  17  -1   41.90    1.80
   8 -17   1   32.50    1.60
   8 -17   1   31.40    1.70
  -8 -17  -1   30.70    1.60
  -8  17  -1   30.50    1.40
   8  17   1   30.40    1.60
   8  17   1   31.70    1.50
  -8  17  -1   32.70    1.50
   8  17   1   26.90    1.60
   9 -17   1    0.30    0.60
  -9 -17  -1    0.30    0.60
   9 -17   1    1.00    0.70
   9  17   1    0.50    0.70
  -9  17  -1    0.00    0.50
  -9  17  -1    0.30    0.60
   9  17   1    0.40    0.60
   9  17   1    0.30    0.60
  10 -17   1    2.20    0.70
  10 -17   1    1.40    0.70
 -10 -17  -1    2.50    0.70
 -10  17  -1    2.50    0.70
  10  17   1    0.60    0.80
  10  17   1    1.60    0.60
 -10  17  -1    1.80    0.60
  11 -17   1    6.00    1.00
  11 -17   1    4.80    0.90
  11  17   1    7.20    1.10
  11  17   1    5.80    0.90
 -11  17  -1    5.60    0.90
 -11  17  -1    5.50    0.80
  12 -17   1    1.00    0.80
  12  17   1    0.50    0.90
 -12  17  -1    1.40    0.70
  12  17   1    2.00    0.80
  12 -18  -1    1.70    0.90
  12 -18  -1    3.00    1.00
  12  18  -1    0.50    0.90
  12  18  -1   -0.40    0.70
 -12  18   1    1.50    0.60
 -12  18   1    2.30    0.80
  11 -18  -1   -0.30    0.80
  11 -18  -1    1.10    0.80
  11  18  -1    1.30    0.90
 -11  18   1    0.10    0.50
  11  18  -1    0.00    0.70
 -11  18   1    0.20    0.70
  10 -18  -1    0.60    0.70
  10 -18  -1    0.60    0.70
 -10 -18   1    0.30    0.60
  10  18  -1   -0.50    0.60
 -10  18   1    0.50    0.50
 -10  18   1    0.00    0.60
  10  18  -1    0.40    0.60
   9 -18  -1    9.20    1.00
   9 -18  -1    9.50    1.00
  -9 -18   1    8.30    0.90
   9  18  -1    9.10    1.00
  -9  18   1    8.80    0.70
   9  18  -1    8.10    0.90
  -9  18   1   10.00    0.90
   8 -18  -1    1.50    0.70
   8 -18  -1    0.60    0.60
  -8 -18   1    0.80    0.60
   8  18  -1    0.70    0.60
  -8  18   1    1.60    0.60
   8  18  -1    1.30    0.60
  -8  18   1    1.70    0.40
   8  18  -1    0.30    0.70
   7 -18  -1   15.80    1.20
   7 -18  -1   17.90    1.10
   7 -18  -1   17.50    1.20
  -7 -18   1   17.50    1.20
  -7 -18   1   17.70    1.10
  -7  18   1   18.00    0.90
   7  18  -1   17.50    1.20
   7  18  -1   17.60    1.10
  -7  18   1   18.00    1.10
   7  18  -1   16.50    1.20
  -6 -18   1   62.69    2.30
   6 -18  -1   60.49    2.40
   6 -18  -1   61.39    2.40
  -6 -18   1   62.49    2.60
  -6  18   1   58.89    2.10
   6  18  -1   59.29    2.30
   6  18  -1   62.69    2.40
   6  18  -1   61.19    2.40
  -6  18   1   62.29    2.30
  -5 -18   1   43.30    1.90
  -5 -18   1   41.50    1.70
   5 -18  -1   44.90    1.80
   5 -18  -1   40.90    1.80
  -5  18   1   44.80    1.80
   5  18  -1   44.00    1.80
   5  18  -1   41.10    1.70
   5  18  -1   41.10    1.80
  -5  18   1   41.30    1.50
  -5  18   1   40.30    1.70
  -4 -18   1    9.10    0.70
   4 -18  -1    8.80    0.80
   4 -18  -1    9.70    0.80
  -4 -18   1   10.80    0.90
   4  18  -1    9.60    0.80
  -4  18   1    7.80    0.70
   4  18  -1    8.60    0.70
  -4  18   1    9.30    0.80
   4  18  -1    8.70    0.80
   3 -18  -1    0.10    0.20
  -3 -18   1    0.30    0.40
  -3 -18   1    0.50    0.40
   3 -18  -1    0.70    0.40
   3 -18  -1   -0.30    0.40
  -3  18   1   -0.10    0.10
   3  18  -1   -0.10    0.40
  -3  18   1    0.30    0.20
  -3  18   1   -0.30    0.40
   3  18  -1   -0.10    0.40
   3  18  -1   -0.10    0.30
  -3  18   1   -0.10    0.30
  -2 -18   1   32.30    1.30
   2 -18  -1   31.10    1.40
   2 -18  -1   31.00    1.20
  -2 -18   1   29.20    1.20
  -2  18   1   31.60    1.40
   2  18  -1   29.30    1.20
  -2  18   1   31.30    1.30
   2  18  -1   31.90    1.50
   2  18  -1   30.90    1.30
  -2  18   1   32.50    1.20
   2  18  -1   30.10    1.30
  -1 -18   1   43.70    1.60
   1 -18  -1   40.50    1.50
   1 -18  -1   41.00    1.80
  -1 -18   1   41.30    1.50
  -1  18   1   42.10    1.50
   1  18  -1   41.90    1.60
  -1  18   1   40.50    1.70
   1  18  -1   44.10    1.60
   1  18  -1   41.80    1.80
   1  18  -1   41.00    1.60
  -1  18   1   40.80    1.60
   1  18  -1   39.90    1.50
   0 -18   1    2.80    0.40
   0 -18   1    2.80    0.40
   0 -18  -1    2.60    0.50
   0 -18   1    2.90    0.40
   0 -18  -1    2.70    0.40
   0 -18   1    3.00    0.50
   0  18  -1    2.90    0.40
   0  18   1    3.10    0.30
   0  18  -1    2.60    0.50
   0  18  -1    2.40    0.50
   0  18   1    2.80    0.50
   0  18  -1    2.90    0.40
   0  18  -1    2.90    0.40
   0  18   1    3.30    0.40
   1 -18   1   12.20    0.90
   1 -18   1   11.60    0.70
   1 -18   1   11.50    0.70
   1 -18   1   11.20    0.70
  -1 -18  -1   10.60    0.80
  -1 -18  -1   11.60    0.70
  -1  18  -1   11.40    0.70
   1  18   1   11.60    0.70
  -1  18  -1   11.10    0.80
  -1  18  -1   11.10    0.80
  -1  18  -1   11.40    0.70
   1  18   1   12.00    0.60
  -1  18  -1   11.90    0.80
   1  18   1   10.80    0.80
  -2 -18  -1   -0.10    0.10
   2 -18   1    0.20    0.30
   2 -18   1    0.20    0.40
   2 -18   1    0.00    0.30
  -2 -18  -1    0.10    0.30
   2 -18   1    0.30    0.30
   2  18   1    0.00    0.10
   2  18   1    0.50    0.40
   2  18   1    0.40    0.40
   2  18   1    0.30    0.30
  -2  18  -1   -0.80    0.30
  -2  18  -1   -0.10    0.30
  -2  18  -1   -0.40    0.30
  -2  18  -1   -0.30    0.30
   3 -18   1   48.10    2.00
   3 -18   1   48.20    1.90
  -3 -18  -1   47.40    2.10
   3 -18   1   49.50    1.70
  -3 -18  -1   49.20    1.80
   3 -18   1   52.39    1.90
   3  18   1   50.09    1.90
  -3  18  -1   50.89    1.90
  -3  18  -1   49.70    1.80
   3  18   1   50.89    1.90
  -3  18  -1   51.89    1.90
  -4 -18  -1    0.90    0.40
  -4 -18  -1    0.60    0.40
   4 -18   1    1.00    0.40
   4 -18   1    0.80    0.40
   4 -18   1    1.00    0.40
  -4  18  -1    0.50    0.40
  -4  18  -1    0.40    0.40
   4  18   1    0.80    0.40
   4  18   1    0.90    0.40
   4  18   1    1.20    0.50
  -4  18  -1    0.80    0.40
   5 -18   1   34.80    1.60
  -5 -18  -1   37.10    1.70
   5 -18   1   36.90    1.60
   5  18   1   35.20    1.50
  -5  18  -1   36.60    1.50
   5  18   1   37.50    1.60
  -5  18  -1   38.30    1.60
  -5  18  -1   36.40    1.60
   5  18   1   35.60    1.70
   6 -18   1   13.10    1.00
   6 -18   1   11.20    1.00
   6 -18   1   11.30    0.90
  -6 -18  -1   12.10    1.00
   6  18   1   11.90    1.00
  -6  18  -1   11.90    1.00
   6  18   1   12.70    0.90
   6  18   1   13.10    1.00
  -6  18  -1   13.80    0.90
   7 -18   1   25.90    1.40
   7 -18   1   25.30    1.50
  -7 -18  -1   26.30    1.50
   7 -18   1   25.10    1.40
  -7  18  -1   26.60    1.40
   7  18   1   27.60    1.50
  -7  18  -1   27.70    1.30
   7  18   1   27.20    1.30
   7  18   1   27.00    1.50
  -8 -18  -1   14.40    1.20
   8 -18   1   13.40    1.20
   8 -18   1   14.10    1.10
   8  18   1   12.70    1.10
  -8  18  -1   15.00    1.00
   8  18   1   13.80    1.10
   8  18   1   15.20    1.10
  -8  18  -1   14.50    1.10
   9 -18   1    5.70    0.80
  -9 -18  -1    4.90    0.80
   9 -18   1    5.30    0.90
   9  18   1    6.40    1.00
  -9  18  -1    5.20    0.70
   9  18   1    5.70    0.80
  -9  18  -1    6.80    0.80
   9  18   1    4.50    0.80
  10 -18   1    0.00    0.70
  10 -18   1    1.60    0.70
 -10 -18  -1    0.10    0.60
  10  18   1   -0.30    0.60
  10  18   1    0.80    0.70
 -10  18  -1   -0.70    0.50
 -10  18  -1    0.80    0.60
  11 -18   1    0.60    0.80
  11 -18   1    0.30    0.70
  11  18   1    1.60    0.70
  11  18   1    1.40    0.90
 -11  18  -1    0.10    0.60
 -11  18  -1    0.80    0.70
  12 -18   1   -0.40    0.80
 -12  18  -1    0.10    0.60
  12  18   1    0.30    0.90
  12  18   1    0.90    0.70
  12 -19  -1    0.60    0.90
  12 -19  -1    0.70    0.90
 -12  19   1    1.00    0.50
 -12  19   1   -0.40    0.70
  12  19  -1    0.40    0.90
  12  19  -1   -0.40    0.70
  11 -19  -1   14.60    1.40
  11 -19  -1   13.80    1.40
 -11  19   1   14.20    1.30
  11  19  -1   13.80    1.40
 -11  19   1   13.00    1.00
  11  19  -1   12.20    1.20
  10 -19  -1    4.30    0.90
  10 -19  -1    5.00    0.90
 -10 -19   1    3.50    0.70
  10  19  -1    3.90    0.80
  10  19  -1    2.10    0.80
 -10  19   1    3.70    0.80
 -10  19   1    2.40    0.60
   9 -19  -1    9.60    1.10
   9 -19  -1    8.60    1.00
  -9 -19   1    9.20    1.00
   9  19  -1    9.40    0.90
  -9  19   1    9.20    0.80
   9  19  -1    9.90    1.10
  -9  19   1    8.90    0.90
  -8 -19   1    3.40    0.70
   8 -19  -1    4.50    0.80
   8 -19  -1    2.90    0.70
   8  19  -1    3.70    0.70
   8  19  -1    3.20    0.60
  -8  19   1    3.30    0.50
   8  19  -1    3.70    0.80
  -8  19   1    3.90    0.70
  -7 -19   1    8.10    0.90
   7 -19  -1    7.50    0.80
   7 -19  -1    8.10    0.90
   7 -19  -1    8.30    0.90
   7  19  -1    8.00    0.90
   7  19  -1    7.50    0.90
  -7  19   1    8.20    0.80
   7  19  -1    8.90    0.80
  -7  19   1    9.30    0.70
   6 -19  -1   10.90    1.00
   6 -19  -1   11.80    0.90
  -6 -19   1   11.40    0.90
  -6 -19   1   12.30    1.10
   6  19  -1   10.50    0.80
   6  19  -1   10.20    1.00
  -6  19   1   11.50    0.70
  -6  19   1   13.00    1.00
   6  19  -1   13.40    1.10
  -6  19   1   12.60    0.90
   5 -19  -1    0.80    0.40
  -5 -19   1    1.40    0.50
   5 -19  -1    1.40    0.60
  -5 -19   1    0.80    0.50
   5  19  -1    2.20    0.60
  -5  19   1    1.40    0.40
  -5  19   1    1.70    0.50
   5  19  -1    0.70    0.50
  -5  19   1    1.30    0.50
   5  19  -1    0.10    0.40
  -4 -19   1    9.90    0.80
  -4 -19   1   10.20    0.90
   4 -19  -1    9.90    0.90
   4 -19  -1   11.00    0.80
   4  19  -1    9.30    0.70
   4  19  -1    8.80    0.80
  -4  19   1    7.90    0.80
   4  19  -1   10.30    0.80
  -4  19   1    9.80    0.80
  -4  19   1    9.90    0.60
   3 -19  -1   13.40    0.90
  -3 -19   1   11.90    0.80
   3 -19  -1   11.40    0.60
  -3 -19   1   12.30    0.90
   3 -19  -1   10.80    0.90
   3  19  -1   11.90    0.90
   3  19  -1   11.00    0.80
  -3  19   1   12.10    0.70
  -3  19   1   11.80    0.80
  -3  19   1   14.40    0.90
   3  19  -1   10.30    0.80
  -2 -19   1   -0.10    0.20
   2 -19  -1    0.20    0.40
  -2 -19   1    1.30    0.40
  -2  19   1    1.10    0.50
   2  19  -1    0.90    0.40
  -2  19   1    0.60    0.40
   2  19  -1    0.90    0.50
  -2  19   1    0.50    0.30
   2  19  -1    1.30    0.40
  -2  19   1    0.40    0.20
   1 -19  -1    2.50    0.50
   1 -19  -1    1.50    0.40
  -1 -19   1    1.90    0.40
   1  19  -1    2.60    0.40
  -1  19   1    2.20    0.30
   1  19  -1    1.60    0.50
  -1  19   1    2.50    0.50
   1  19  -1    1.90    0.40
  -1  19   1    2.30    0.40
   0 -19  -1    1.40    0.40
   0 -19   1    0.90    0.40
   0 -19   1    1.00    0.40
   0 -19  -1    1.00    0.40
   0  19  -1    1.80    0.50
   0  19   1    0.90    0.40
   0  19  -1    1.60    0.40
   0  19   1    1.50    0.30
   0  19   1    1.30    0.50
   0  19  -1    1.20    0.40
  -1 -19  -1    8.70    0.60
   1 -19   1    7.80    0.60
  -1 -19  -1    6.30    0.70
   1 -19   1    9.20    0.80
  -1  19  -1    9.50    0.70
   1  19   1    8.50    0.70
   1  19   1    9.90    0.60
  -1  19  -1    8.90    0.70
   1  19   1    8.50    0.70
  -1  19  -1    8.40    0.60
   2 -19   1   20.20    1.00
   2 -19   1   19.30    1.00
   2 -19   1   19.40    0.90
   2 -19   1   20.20    1.10
  -2 -19  -1   20.70    1.00
  -2  19  -1   18.50    1.00
  -2  19  -1   19.90    0.90
   2  19   1   19.60    1.00
  -2  19  -1   18.40    1.00
   2  19   1   19.90    1.10
   3 -19   1   19.20    1.10
   3 -19   1   17.50    0.80
   3 -19   1   18.50    1.00
   3 -19   1   16.80    1.00
  -3 -19  -1   16.50    1.10
  -3  19  -1   19.50    1.00
  -3  19  -1   17.90    0.90
   3  19   1   18.20    1.00
   3  19   1   17.40    1.10
  -3  19  -1   18.10    1.00
  -4 -19  -1    0.50    0.40
   4 -19   1    0.40    0.40
   4 -19   1    1.00    0.50
   4  19   1    0.80    0.50
  -4  19  -1    0.10    0.40
   4  19   1    0.50    0.40
   4  19   1    0.10    0.40
  -4  19  -1    0.90    0.40
  -4  19  -1    0.70    0.50
  -5 -19  -1   25.20    1.40
   5 -19   1   27.10    1.40
   5 -19   1   25.90    1.30
  -5  19  -1   26.00    1.30
  -5  19  -1   25.40    1.20
   5  19   1   26.10    1.20
   5  19   1   28.50    1.40
  -5  19  -1   25.60    1.30
   5  19   1   27.70    1.30
   6 -19   1   40.70    1.80
   6 -19   1   39.90    1.80
  -6 -19  -1   44.50    2.00
  -6  19  -1   44.90    1.80
  -6  19  -1   41.00    1.70
   6  19   1   43.90    1.80
   6  19   1   38.90    1.80
   6  19   1   42.30    1.70
   7 -19   1   -0.10    0.60
   7 -19   1    0.10    0.60
   7 -19   1    0.20    0.50
  -7 -19  -1    0.50    0.60
   7  19   1    0.10    0.50
   7  19   1   -0.20    0.50
   7  19   1    0.40    0.50
  -7  19  -1   -0.10    0.40
  -7  19  -1   -0.60    0.50
   8 -19   1   13.70    1.20
   8 -19   1   15.50    1.20
  -8 -19  -1   12.90    1.10
   8  19   1   14.40    1.20
   8  19   1   15.00    1.10
   8  19   1   15.60    1.20
  -8  19  -1   15.60    1.10
  -8  19  -1   15.20    1.10
   9 -19   1    8.40    1.00
  -9 -19  -1    7.50    1.00
   9 -19   1    7.50    1.10
   9  19   1    8.90    0.90
   9  19   1    9.80    1.10
   9  19   1    8.20    1.00
  -9  19  -1    7.90    0.90
  -9  19  -1    7.80    0.80
  10 -19   1    1.30    0.80
  10 -19   1    0.80    0.70
 -10 -19  -1    0.60    0.60
 -10  19  -1    1.00    0.60
 -10  19  -1   -1.40    0.60
  10  19   1    0.00    0.60
  10  19   1   -0.30    0.80
  11 -19   1    2.40    0.80
  11 -19   1    1.20    0.80
  11  19   1    2.00    0.70
 -11  19  -1    1.60    0.80
 -11  19  -1    1.70    0.70
  11  19   1    1.70    0.80
  12 -19   1    1.70    0.90
  12  19   1   -0.40    0.90
 -12  19  -1   -0.30    0.60
  12  19   1   -0.50    0.70
  12 -20  -1    4.80    1.10
  12 -20  -1    5.60    1.10
 -12  20   1    5.00    1.00
 -12  20   1    6.10    0.80
  12  20  -1    3.50    0.90
  12  20  -1    5.50    1.20
  11 -20  -1    0.90    0.80
  11 -20  -1    2.20    0.90
 -11  20   1    1.70    0.60
  11  20  -1    1.70    0.70
 -11  20   1    2.40    0.70
  11  20  -1    2.60    0.80
  10 -20  -1    8.30    1.10
  10 -20  -1   10.40    1.20
 -10 -20   1    9.00    1.00
  10  20  -1    7.80    1.00
  10  20  -1    8.30    1.00
 -10  20   1    9.00    1.00
 -10  20   1    7.50    0.80
  -9 -20   1    2.40    0.70
   9 -20  -1    1.80    0.80
   9 -20  -1    2.20    0.80
  -9  20   1    2.20    0.70
   9  20  -1    2.50    0.70
  -9  20   1    1.50    0.50
   9  20  -1    3.10    0.80
   8 -20  -1    4.20    0.70
   8 -20  -1    3.30    0.80
  -8 -20   1    5.00    0.80
   8  20  -1    5.80    0.80
   8  20  -1    4.00    0.70
  -8  20   1    4.70    0.70
   8  20  -1    2.90    0.80
  -8  20   1    4.50    0.60
   7 -20  -1    3.10    0.70
   7 -20  -1    4.40    0.60
  -7 -20   1    4.90    0.80
   7 -20  -1    4.10    0.70
  -7  20   1    3.80    0.70
   7  20  -1    4.00    0.70
   7  20  -1    3.40    0.70
  -7  20   1    3.70    0.50
   7  20  -1    4.30    0.80
   6 -20  -1   13.10    1.00
   6 -20  -1   11.30    1.00
  -6 -20   1   12.30    1.10
  -6  20   1   15.30    1.00
  -6  20   1   13.80    1.00
  -6  20   1   12.80    0.80
   6  20  -1   11.90    1.10
   6  20  -1   11.10    0.90
   6  20  -1   14.10    1.10
   5 -20  -1    2.90    0.50
   5 -20  -1    2.30    0.60
  -5 -20   1    2.00    0.60
  -5  20   1    1.60    0.40
  -5  20   1    1.20    0.50
   5  20  -1    2.10    0.60
   5  20  -1    1.30    0.50
  -5  20   1    1.50    0.60
   5  20  -1    2.10    0.60
   4 -20  -1    0.80    0.50
  -4 -20   1    1.20    0.40
  -4 -20   1    1.30    0.60
   4 -20  -1    0.90    0.50
   4  20  -1    0.50    0.50
  -4  20   1    0.60    0.30
  -4  20   1    0.50    0.50
  -4  20   1    0.90    0.40
   4  20  -1    0.60    0.50
   4  20  -1    0.60    0.40
   3 -20  -1   18.20    1.10
  -3 -20   1   17.20    1.10
   3 -20  -1   16.60    1.00
  -3 -20   1   18.10    1.00
   3  20  -1   17.70    1.00
   3  20  -1   17.60    1.00
  -3  20   1   17.30    1.10
   3  20  -1   17.90    1.10
  -3  20   1   17.50    1.00
  -3  20   1   17.70    0.80
   2 -20  -1  153.68    5.60
  -2 -20   1  162.68    5.00
   2  20  -1  159.68    5.20
  -2  20   1  162.38    5.20
   2  20  -1  153.48    5.10
  -2  20   1  134.79    4.90
   2  20  -1  160.78    5.00
  -2  20   1  160.98    5.10
  -2  20   1  171.48    5.00
  -1 -20   1   43.60    1.70
   1 -20  -1   44.00    1.90
  -1  20   1   44.60    1.70
   1  20  -1   44.80    1.80
   1  20  -1   45.60    1.80
  -1  20   1   43.40    1.80
  -1  20   1   44.80    1.60
   1  20  -1   42.10    1.60
   0 -20  -1   47.70    2.10
   0 -20   1   47.50    2.10
   0 -20   1   50.09    1.90
   0  20   1   49.10    2.00
   0  20   1   53.39    1.80
   0  20   1   50.29    1.90
   0  20  -1   49.10    1.80
   0  20  -1   53.09    2.00
   0  20  -1   48.20    1.90
   1 -20   1   27.60    1.20
  -1 -20  -1   31.90    1.50
   1 -20   1   27.00    1.40
   1  20   1   28.60    1.40
   1  20   1   29.20    1.30
  -1  20  -1   28.10    1.30
  -1  20  -1   27.10    1.20
  -1  20  -1   29.50    1.30
   2 -20   1    0.80    0.50
   2 -20   1    1.20    0.30
   2 -20   1    1.30    0.50
  -2 -20  -1   -0.10    0.20
   2 -20   1    0.90    0.40
   2  20   1    1.30    0.40
  -2  20  -1    0.50    0.30
  -2  20  -1    1.00    0.40
   2  20   1    0.40    0.50
  -2  20  -1    0.20    0.40
   3 -20   1    2.70    0.60
  -3 -20  -1    2.40    0.60
   3 -20   1    3.10    0.40
   3 -20   1    3.00    0.50
  -3  20  -1    2.50    0.50
   3  20   1    2.60    0.40
   3  20   1    2.60    0.60
  -3  20  -1    3.00    0.60
   3  20   1    2.80    0.50
  -3  20  -1    3.10    0.50
  -4 -20  -1    1.10    0.60
   4 -20   1    1.00    0.50
   4 -20   1   -0.10    0.40
  -4  20  -1   -0.10    0.40
   4  20   1    0.10    0.40
   4  20   1    0.90    0.60
  -4  20  -1    0.20    0.40
  -4  20  -1    0.10    0.50
   4  20   1    0.60    0.50
   5 -20   1    0.20    0.50
  -5 -20  -1   -0.40    0.50
   5 -20   1    1.40    0.50
  -5  20  -1   -0.10    0.50
   5  20   1    0.60    0.50
   5  20   1   -0.10    0.60
  -5  20  -1    0.00    0.40
  -5  20  -1    0.10    0.50
   5  20   1    0.00    0.40
  -6 -20  -1   56.39    2.40
   6 -20   1   52.09    2.20
   6 -20   1   54.09    2.20
   6  20   1   50.49    2.00
   6  20   1   52.79    2.20
  -6  20  -1   54.19    2.20
  -6  20  -1   51.79    2.00
   6  20   1   53.69    2.20
   7 -20   1   -0.30    0.60
   7 -20   1    0.50    0.50
  -7 -20  -1    0.30    0.50
   7 -20   1    0.40    0.60
  -7  20  -1    0.20    0.50
   7  20   1   -0.20    0.50
  -7  20  -1    0.50    0.60
   7  20   1   -0.30    0.40
   7  20   1    0.50    0.60
  -8 -20  -1    5.40    0.90
   8 -20   1    6.10    0.90
   8 -20   1    5.90    0.80
  -8  20  -1    7.30    0.90
   8  20   1    5.70    0.90
   8  20   1    6.40    0.80
   8  20   1    4.30    0.70
  -8  20  -1    5.20    0.70
  -9 -20  -1    1.10    0.70
   9 -20   1    0.60    0.70
   9 -20   1    1.90    0.80
   9  20   1    2.50    0.80
   9  20   1    0.90    0.70
   9  20   1    0.70    0.60
  -9  20  -1    0.90    0.60
  -9  20  -1    2.00    0.60
  10 -20   1    0.10    0.70
  10 -20   1    1.40    0.70
 -10 -20  -1    0.50    0.70
  10  20   1    1.20    0.80
 -10  20  -1    1.80    0.70
  10  20   1    1.20    0.70
 -10  20  -1    0.70    0.60
  11 -20   1    1.70    0.90
  11 -20   1    2.20    0.90
 -11  20  -1    0.90    0.70
  11  20   1    1.30    0.90
 -11  20  -1    0.70    0.60
  11  20   1    2.10    0.70
  12 -20   1    2.90    1.00
 -12  20  -1    1.70    0.70
  12  20   1    1.70    1.00
  12  20   1    1.40    0.80
  12 -21  -1    1.80    0.90
  12 -21  -1    0.50    0.90
 -12  21   1    1.30    0.60
  12  21  -1    0.20    1.00
  12  21  -1    2.10    0.80
 -12  21   1    1.50    0.80
  11 -21  -1    1.50    0.90
  11 -21  -1    0.50    0.80
 -11  21   1    1.40    0.60
 -11  21   1    1.10    0.70
  11  21  -1    2.40    0.80
  11  21  -1    1.40    0.90
 -10 -21   1    1.60    0.70
  10 -21  -1    2.40    0.80
  10 -21  -1    2.80    0.90
 -10  21   1    1.50    0.70
  10  21  -1    2.40    0.90
 -10  21   1    2.40    0.50
  10  21  -1    1.20    0.70
  -9 -21   1    2.60    0.70
   9 -21  -1    1.80    0.70
   9 -21  -1    1.00    0.70
   9  21  -1    2.30    0.80
  -9  21   1    2.10    0.70
   9  21  -1    0.80    0.60
  -9  21   1    1.10    0.50
  -8 -21   1    3.10    0.70
   8 -21  -1    3.20    0.80
   8 -21  -1    3.80    0.80
   8  21  -1    3.60    0.70
   8  21  -1    3.50    0.80
  -8  21   1    3.70    0.50
   8  21  -1    4.30    0.80
  -8  21   1    4.30    0.70
   7 -21  -1    0.20    0.60
   7 -21  -1   -0.10    0.50
   7 -21  -1    0.00    0.60
  -7 -21   1    0.60    0.60
   7  21  -1    0.10    0.50
  -7  21   1    0.50    0.60
   7  21  -1    0.00    0.60
   7  21  -1   -0.20    0.60
  -7  21   1   -0.40    0.40
  -6 -21   1   43.50    2.00
   6 -21  -1   36.20    1.80
   6 -21  -1   40.10    1.90
   6  21  -1   42.30    1.90
  -6  21   1   41.40    1.60
  -6  21   1   43.40    1.80
  -6  21   1   41.70    1.90
   6  21  -1   43.40    1.90
   6  21  -1   39.30    1.70
  -5 -21   1   12.10    1.00
   5 -21  -1   13.90    1.00
   5 -21  -1   11.80    1.00
  -5  21   1   13.40    0.80
  -5  21   1   13.80    1.10
   5  21  -1   13.10    0.90
  -5  21   1   14.40    1.00
   5  21  -1   12.80    1.10
   5  21  -1   12.40    1.00
   4 -21  -1   24.30    1.30
  -4 -21   1   25.20    1.50
   4 -21  -1   25.30    1.30
   4  21  -1   25.80    1.30
  -4  21   1   22.30    1.30
   4  21  -1   21.90    1.20
  -4  21   1   23.60    1.00
  -4  21   1   24.00    1.20
   4  21  -1   25.00    1.20
   3 -21  -1   18.40    1.10
   3 -21  -1   18.00    1.10
  -3 -21   1   17.50    1.20
  -3  21   1   17.70    0.80
   3  21  -1   15.60    1.00
  -3  21   1   16.50    1.00
  -3  21   1   16.50    1.10
   3  21  -1   17.30    1.00
   3  21  -1   16.60    1.00
   2 -21  -1   28.60    1.40
  -2 -21   1   26.10    1.30
  -2 -21   1   24.40    1.40
  -2  21   1   26.80    1.20
  -2  21   1   28.90    1.30
  -2  21   1   25.80    1.10
   2  21  -1   28.70    1.30
   2  21  -1   26.80    1.20
   2  21  -1   26.90    1.30
   1 -21  -1   18.80    1.10
  -1 -21   1   18.70    1.10
  -1 -21   1   18.00    1.00
   1  21  -1   19.00    1.00
  -1  21   1   18.20    1.10
  -1  21   1   17.90    1.00
  -1  21   1   19.10    0.90
   1  21  -1   17.80    1.00
   1  21  -1   20.60    1.10
   0 -21   1    1.10    0.50
   0 -21  -1    0.80    0.50
   0  21  -1    0.00    0.40
   0  21   1    0.70    0.40
   0  21  -1    0.70    0.40
   0  21   1    0.00    0.40
   0  21  -1    1.20    0.50
   0  21   1    0.60    0.30
   1 -21   1   11.30    1.00
   1 -21   1   10.90    0.80
  -1 -21  -1   10.90    0.90
  -1  21  -1   11.70    0.90
   1  21   1    8.70    0.60
   1  21   1   11.20    0.80
  -1  21  -1   10.80    0.90
   1  21   1   11.00    0.80
  -1  21  -1   10.40    0.70
  -2 -21  -1   42.80    2.00
   2 -21   1   42.50    1.90
   2 -21   1   46.10    1.70
   2 -21   1   42.60    1.80
   2  21   1   44.90    1.90
  -2  21  -1   45.10    1.80
   2  21   1   44.20    1.80
  -2  21  -1   46.00    1.80
   2  21   1   44.60    1.60
  -2  21  -1   43.70    1.70
   3 -21   1   61.29    2.40
  -3 -21  -1   61.09    2.60
   3 -21   1   63.19    2.60
   3  21   1   68.89    2.40
  -3  21  -1   66.19    2.40
  -3  21  -1   65.79    2.40
   3  21   1   64.09    2.20
  -3  21  -1   63.89    2.30
   3  21   1   64.09    2.50
   4 -21   1   10.40    0.90
  -4 -21  -1   10.10    0.90
   4 -21   1   11.30    0.90
  -4  21  -1   12.50    0.90
  -4  21  -1   12.70    0.90
  -4  21  -1   10.60    0.80
   4  21   1   10.20    0.80
   4  21   1   10.10    0.80
   4  21   1   10.50    1.00
   5 -21   1   10.40    0.90
  -5 -21  -1   10.50    1.00
   5 -21   1    9.80    0.90
   5  21   1   11.30    0.90
   5  21   1   12.60    0.90
  -5  21  -1   11.20    0.90
  -5  21  -1   11.40    0.80
   5  21   1   11.70    1.00
  -5  21  -1   11.40    0.90
   6 -21   1    7.50    0.80
   6 -21   1    9.50    0.90
  -6 -21  -1    7.30    0.90
   6  21   1    7.60    0.70
  -6  21  -1    7.80    0.80
  -6  21  -1    7.40    0.70
   6  21   1    7.20    0.80
   6  21   1    6.90    0.80
   7 -21   1    2.90    0.70
  -7 -21  -1    3.60    0.80
   7 -21   1    4.20    0.80
   7 -21   1    4.90    0.70
   7  21   1    4.60    0.70
   7  21   1    5.10    0.80
  -7  21  -1    4.70    0.60
   7  21   1    4.00    0.80
  -7  21  -1    4.60    0.70
   8 -21   1    2.90    0.80
   8 -21   1    2.60    0.80
  -8 -21  -1    2.10    0.70
  -8  21  -1    2.40    0.70
   8  21   1    2.00    0.70
  -8  21  -1    2.80    0.60
   8  21   1    2.20    0.70
   8  21   1    2.40    0.60
  -9 -21  -1    1.50    0.70
   9 -21   1    1.90    0.80
   9 -21   1    0.80    0.70
  -9  21  -1    2.20    0.70
   9  21   1    1.60    0.80
   9  21   1    1.00    0.70
  -9  21  -1    0.40    0.50
   9  21   1    1.30    0.60
  10 -21   1    0.20    0.70
 -10 -21  -1   -0.30    0.70
  10 -21   1    1.10    0.80
  10  21   1    0.60    0.60
 -10  21  -1   -0.10    0.60
 -10  21  -1   -0.10    0.70
  10  21   1    1.30    0.90
  11 -21   1    3.20    0.90
  11 -21   1    1.00    0.80
 -11  21  -1    2.00    0.70
  11  21   1    1.40    0.70
  11  21   1    2.40    1.00
 -11  21  -1    1.70    0.80
  11 -22  -1    1.20    0.90
  11 -22  -1    3.20    1.00
  11  22  -1    3.80    1.00
  11  22  -1    3.80    0.80
 -11  22   1    3.50    0.90
 -11  22   1    2.20    0.60
  10 -22  -1    4.50    0.90
  10 -22  -1    2.10    0.90
 -10 -22   1    3.20    0.80
  10  22  -1    3.10    0.80
 -10  22   1    3.30    0.60
  10  22  -1    2.80    0.90
 -10  22   1    2.40    0.80
   9 -22  -1    2.30    0.80
  -9 -22   1    2.10    0.70
   9 -22  -1    1.10    0.80
  -9  22   1    3.40    0.80
   9  22  -1    2.50    0.80
  -9  22   1    1.50    0.50
   9  22  -1    2.70    0.70
   8 -22  -1    2.30    0.80
   8 -22  -1    2.10    0.70
  -8 -22   1    2.60    0.70
   8  22  -1    2.00    0.60
   8  22  -1    2.50    0.80
  -8  22   1    2.40    0.50
   8  22  -1    3.20    0.80
  -8  22   1    2.90    0.70
   7 -22  -1    2.30    0.70
   7 -22  -1    1.50    0.70
  -7 -22   1    2.40    0.70
   7  22  -1    1.20    0.70
   7  22  -1    1.50    0.70
  -7  22   1    1.70    0.60
  -7  22   1    1.50    0.40
   7  22  -1    1.40    0.60
  -6 -22   1    0.50    0.60
   6 -22  -1    0.70    0.50
   6 -22  -1    0.60    0.50
   6  22  -1    0.70    0.50
  -6  22   1    0.50    0.60
  -6  22   1    0.40    0.40
  -6  22   1    0.40    0.50
   6  22  -1   -0.10    0.60
   6  22  -1    0.80    0.60
   5 -22  -1   18.90    1.20
   5 -22  -1   18.00    1.20
  -5 -22   1   22.60    1.30
  -5  22   1   20.30    1.00
  -5  22   1   21.40    1.30
   5  22  -1   20.30    1.30
   5  22  -1   19.50    1.30
   5  22  -1   21.50    1.20
  -5  22   1   21.40    1.20
   4 -22  -1    4.30    0.70
  -4 -22   1    3.10    0.70
   4 -22  -1    2.80    0.60
  -4  22   1    3.60    0.60
   4  22  -1    2.90    0.60
  -4  22   1    2.60    0.40
   4  22  -1    3.60    0.70
  -4  22   1    3.10    0.60
   4  22  -1    3.00    0.60
  -3 -22   1    1.50    0.60
   3 -22  -1    1.50    0.60
   3 -22  -1    1.40    0.60
   3  22  -1    2.20    0.60
  -3  22   1    1.50    0.60
   3  22  -1    2.10    0.60
  -3  22   1    1.80    0.40
  -3  22   1    2.00    0.50
   3  22  -1    0.60    0.40
  -2 -22   1    0.70    0.50
   2 -22  -1   -0.40    0.50
   2  22  -1    0.10    0.40
  -2  22   1    0.00    0.50
   2  22  -1    0.80    0.50
   2  22  -1   -0.40    0.50
  -2  22   1    0.40    0.40
  -2  22   1   -0.20    0.30
  -1 -22   1   27.90    1.50
   1 -22  -1   25.30    1.40
  -1  22   1   27.70    1.30
   1  22  -1   27.40    1.30
   1  22  -1   23.80    1.30
   1  22  -1   24.80    1.20
  -1  22   1   26.10    1.30
  -1  22   1   25.20    1.10
   0 -22  -1    0.30    0.50
   0 -22   1    0.30    0.50
   0  22  -1    0.00    0.50
   0  22  -1    0.00    0.40
   0  22   1   -0.20    0.40
   0  22   1    0.30    0.50
   0  22   1    0.10    0.30
   0  22  -1   -0.10    0.40
   1 -22   1    3.40    0.70
  -1 -22  -1    3.40    0.60
   1 -22   1    3.80    0.50
  -1  22  -1    4.30    0.60
   1  22   1    3.60    0.50
  -1  22  -1    2.70    0.50
   1  22   1    2.90    0.60
  -1  22  -1    2.90    0.60
   1  22   1    2.80    0.40
   2 -22   1   -0.10    0.30
   2 -22   1    0.80    0.50
  -2 -22  -1    0.50    0.50
   2 -22   1   -0.50    0.50
  -2  22  -1    0.40    0.50
   2  22   1    0.30    0.30
   2  22   1    0.10    0.40
  -2  22  -1   -0.10    0.40
  -2  22  -1    0.50    0.50
   2  22   1   -0.30    0.40
  -3 -22  -1   25.80    1.50
   3 -22   1   24.40    1.30
   3 -22   1   26.80    1.50
   3  22   1   25.70    1.30
   3  22   1   25.90    1.40
  -3  22  -1   25.70    1.20
  -3  22  -1   26.80    1.30
   3  22   1   25.10    1.20
  -3  22  -1   27.30    1.30
   4 -22   1    1.30    0.60
   4 -22   1    1.60    0.50
  -4 -22  -1    1.30    0.60
   4  22   1    1.30    0.60
   4  22   1    0.70    0.40
  -4  22  -1    1.40    0.50
  -4  22  -1    1.60    0.50
  -4  22  -1    0.60    0.50
   4  22   1    0.30    0.50
   5 -22   1   16.60    1.10
   5 -22   1   17.00    1.10
  -5 -22  -1   17.30    1.30
  -5  22  -1   15.60    1.10
  -5  22  -1   15.90    1.00
  -5  22  -1   17.60    1.10
   5  22   1   15.90    1.00
   5  22   1   15.60    1.10
   5  22   1   16.90    1.10
   6 -22   1    5.00    0.80
   6 -22   1    5.10    0.80
  -6 -22  -1    5.40    0.90
  -6  22  -1    4.10    0.60
   6  22   1    5.10    0.80
  -6  22  -1    4.80    0.70
   6  22   1    4.30    0.60
   6  22   1    4.50    0.70
   7 -22   1   -0.80    0.50
  -7 -22  -1   -0.30    0.60
   7 -22   1   -0.40    0.60
   7 -22   1   -0.20    0.60
   7  22   1   -0.40    0.50
  -7  22  -1    0.30    0.60
   7  22   1   -0.60    0.60
  -7  22  -1   -0.10    0.40
   7  22   1    0.00    0.70
   8 -22   1    0.60    0.70
   8 -22   1    0.30    0.70
  -8 -22  -1    1.00    0.70
  -8  22  -1    0.80    0.60
  -8  22  -1    0.20    0.50
   8  22   1   -0.70    0.70
   8  22   1    1.00    0.80
   8  22   1    0.80    0.60
   9 -22   1   -0.10    0.70
   9 -22   1    0.30    0.70
  -9 -22  -1    0.20    0.70
  -9  22  -1    0.40    0.50
   9  22   1    0.60    0.80
  -9  22  -1    0.50    0.60
   9  22   1    0.10    0.60
   9  22   1    1.20    0.70
 -10 -22  -1    0.30    0.70
  10 -22   1    0.50    0.80
  10 -22   1    0.50    0.70
 -10  22  -1    0.10    0.50
 -10  22  -1    0.70    0.70
  10  22   1   -1.10    0.60
  10  22   1    0.10    0.80
  11 -22   1    2.50    1.00
  11 -22   1    2.80    0.90
  11  22   1    2.40    1.00
 -11  22  -1    2.80    0.70
  11  22   1    2.30    0.80
  11 -23  -1    3.50    1.00
  11 -23  -1    1.80    0.90
 -11  23   1    1.90    0.80
 -11  23   1    3.60    0.70
  11  23  -1    2.50    0.80
  11  23  -1    1.20    0.90
 -10 -23   1   -0.80    0.70
  10 -23  -1    0.30    0.80
  10 -23  -1    0.50    0.80
 -10  23   1    0.50    0.50
  10  23  -1    1.10    0.90
  10  23  -1    0.00    0.70
 -10  23   1    1.10    0.70
   9 -23  -1    1.20    0.80
  -9 -23   1    1.10    0.70
   9 -23  -1    0.00    0.70
   9  23  -1    0.00    0.60
  -9  23   1    0.00    0.40
  -9  23   1   -0.70    0.60
   9  23  -1    0.50    0.80
   8 -23  -1   -0.30    0.60
  -8 -23   1    0.50    0.70
   8 -23  -1    1.50    0.70
   8  23  -1    1.10    0.60
   8  23  -1    0.70    0.70
   8  23  -1    0.60    0.70
  -8  23   1    0.30    0.40
  -8  23   1    0.30    0.60
  -7 -23   1    1.10    0.70
   7 -23  -1    1.90    0.70
   7 -23  -1    2.30    0.70
   7  23  -1    1.80    0.70
  -7  23   1    1.00    0.60
   7  23  -1    2.20    0.70
  -7  23   1    1.70    0.50
   7  23  -1    1.50    0.60
  -6 -23   1    6.90    1.00
   6 -23  -1    7.10    0.90
   6 -23  -1    9.10    0.90
   6  23  -1    8.50    0.80
   6  23  -1    9.80    0.90
  -6  23   1    8.20    0.90
  -6  23   1    8.40    0.80
   6  23  -1    8.30    1.00
  -6  23   1    9.40    0.70
   5 -23  -1    1.90    0.60
  -5 -23   1    1.00    0.60
   5 -23  -1    1.80    0.70
   5  23  -1    2.10    0.70
  -5  23   1    2.10    0.60
   5  23  -1    2.20    0.60
  -5  23   1    1.80    0.40
   5  23  -1    1.50    0.60
  -5  23   1    2.10    0.70
   4 -23  -1    0.90    0.60
   4 -23  -1    0.40    0.60
  -4 -23   1    1.00    0.50
   4  23  -1    0.50    0.60
  -4  23   1    0.50    0.40
   4  23  -1    0.60    0.50
  -4  23   1    1.20    0.50
  -4  23   1    2.10    0.70
   4  23  -1    0.70    0.60
  -3 -23   1   75.59    3.10
   3 -23  -1   75.79    2.90
   3 -23  -1   77.39    3.10
   3  23  -1   78.89    2.70
  -3  23   1   75.79    2.90
   3  23  -1   81.19    2.90
   3  23  -1   77.59    2.90
  -3  23   1   77.19    2.60
  -3  23   1   78.89    2.80
  -2 -23   1   30.20    1.60
   2 -23  -1   32.70    1.60
  -2  23   1   32.70    1.30
   2  23  -1   32.60    1.50
   2  23  -1   28.00    1.30
   2  23  -1   30.80    1.50
  -2  23   1   33.20    1.40
  -2  23   1   31.60    1.50
  -1 -23   1   56.09    2.40
   1 -23  -1   54.39    2.40
  -1  23   1   53.49    2.10
   1  23  -1   57.29    2.10
  -1  23   1   52.79    2.20
  -1  23   1   54.39    1.90
   1  23  -1   53.69    2.00
   1  23  -1   52.99    2.20
   0 -23  -1    9.40    0.90
   0 -23   1    7.00    0.80
   0  23   1    8.30    0.60
   0  23  -1    7.80    0.70
   0  23  -1    8.70    0.80
   0  23   1    7.20    0.80
   0  23   1    7.90    0.70
   0  23  -1    8.20    0.80
  -1 -23  -1    5.30    0.70
   1 -23   1    6.20    0.60
   1 -23   1    5.40    0.80
   1  23   1    5.50    0.50
  -1  23  -1    5.30    0.60
   1  23   1    5.90    0.70
  -1  23  -1    6.50    0.70
   1  23   1    6.30    0.80
  -1  23  -1    5.90    0.70
   2 -23   1   18.30    0.90
   2 -23   1   14.50    1.00
  -2 -23  -1   15.60    1.20
   2 -23   1   15.00    1.20
  -2  23  -1   15.10    0.90
  -2  23  -1   15.80    1.10
   2  23   1   15.70    1.10
  -2  23  -1   15.30    1.00
   2  23   1   15.30    0.80
   2  23   1   16.00    1.00
  -3 -23  -1   44.40    2.20
   3 -23   1   47.10    2.20
   3 -23   1   48.30    2.00
  -3  23  -1   50.09    1.90
  -3  23  -1   48.40    2.00
   3  23   1   48.40    2.10
   3  23   1   51.69    2.00
   3  23   1   49.30    1.80
  -3  23  -1   49.30    2.00
   4 -23   1    3.30    0.70
   4 -23   1    2.00    0.60
  -4 -23  -1    2.80    0.70
   4  23   1    3.50    0.60
  -4  23  -1    3.30    0.50
   4  23   1    3.40    0.50
   4  23   1    2.80    0.70
  -4  23  -1    2.80    0.60
  -4  23  -1    3.90    0.70
   5 -23   1   -0.20    0.50
  -5 -23  -1   -0.10    0.50
   5 -23   1   -0.20    0.50
  -5  23  -1   -0.30    0.50
   5  23   1    0.30    0.50
  -5  23  -1   -0.30    0.40
   5  23   1    0.10    0.60
  -5  23  -1   -0.10    0.50
   5  23   1   -0.10    0.40
   6 -23   1    1.10    0.60
   6 -23   1    1.20    0.60
  -6 -23  -1    2.00    0.70
  -6  23  -1    1.60    0.60
  -6  23  -1    1.60    0.50
   6  23   1    0.60    0.50
   6  23   1    0.80    0.70
   6  23   1    2.20    0.70
   7 -23   1    0.80    0.60
   7 -23   1   -0.90    0.60
  -7 -23  -1    1.10    0.70
   7 -23   1    0.10    0.50
   7  23   1   -0.30    0.60
  -7  23  -1    0.40    0.60
   7  23   1    0.50    0.70
  -7  23  -1   -0.30    0.40
   7  23   1    0.70    0.50
   8 -23   1    0.30    0.70
   8 -23   1   -0.20    0.60
  -8 -23  -1    0.10    0.60
   8  23   1    0.10    0.50
  -8  23  -1    1.60    0.50
   8  23   1    1.20    0.80
  -8  23  -1   -0.20    0.60
   8  23   1   -0.40    0.60
   9 -23   1    1.90    0.80
   9 -23   1    2.50    0.80
  -9 -23  -1    2.50    0.70
   9  23   1    1.90    0.90
   9  23   1    1.40    0.80
   9  23   1    2.40    0.70
  -9  23  -1    2.10    0.60
  -9  23  -1    3.10    0.80
  10 -23   1    3.00    0.90
  10 -23   1    0.10    0.80
 -10 -23  -1    1.10    0.80
 -10  23  -1    1.60    0.70
  10  23   1    1.30    0.70
  10  23   1    1.70    0.90
 -10  23  -1    2.40    0.60
  11 -23   1    1.30    0.90
  11 -23   1    0.60    0.90
 -11  23  -1    0.60    0.60
  11  23   1    1.70    1.00
  11  23   1    0.70    0.70
  11 -24  -1    0.70    1.00
  11 -24  -1    0.70    0.90
 -11  24   1    1.70    0.80
  11  24  -1    2.00    1.00
  11  24  -1    0.90    0.80
 -11  24   1    1.20    0.60
  10 -24  -1   16.70    1.50
 -10 -24   1   17.00    1.40
  10 -24  -1   18.80    1.60
 -10  24   1   16.50    1.10
  10  24  -1   15.50    1.50
 -10  24   1   16.30    1.40
  10  24  -1   16.40    1.30
   9 -24  -1   -0.80    0.70
  -9 -24   1    0.50    0.70
   9 -24  -1    0.20    0.70
   9  24  -1    0.30    0.80
  -9  24   1    0.60    0.70
  -9  24   1    0.30    0.50
   9  24  -1   -0.10    0.60
   8 -24  -1    0.00    0.60
   8 -24  -1    0.10    0.70
  -8 -24   1    0.40    0.70
  -8  24   1    0.30    0.40
   8  24  -1    0.30    0.70
   8  24  -1   -1.20    0.60
   8  24  -1    0.00    0.60
  -8  24   1   -0.10    0.60
   7 -24  -1    1.30    0.70
  -7 -24   1    1.70    0.70
   7 -24  -1    2.30    0.70
   7  24  -1    1.40    0.70
   7  24  -1    2.10    0.80
   7  24  -1    1.60    0.60
  -7  24   1    1.60    0.50
  -7  24   1    2.10    0.70
   6 -24  -1    0.80    0.60
  -6 -24   1   -0.50    0.60
   6 -24  -1   -0.10    0.50
  -6  24   1    0.10    0.40
  -6  24   1   -0.10    0.50
  -6  24   1    1.20    0.60
   6  24  -1    1.10    0.70
   6  24  -1    0.70    0.70
   6  24  -1    0.60    0.50
   5 -24  -1   31.20    1.60
  -5 -24   1   31.50    1.80
   5 -24  -1   28.80    1.60
   5  24  -1   28.90    1.50
  -5  24   1   31.30    1.30
   5  24  -1   33.70    1.60
   5  24  -1   29.70    1.60
  -5  24   1   29.70    1.50
  -5  24   1   31.20    1.60
  -4 -24   1    8.70    0.90
   4 -24  -1    7.50    0.90
   4 -24  -1    9.30    0.90
   4  24  -1    7.30    0.90
   4  24  -1    6.50    0.70
  -4  24   1    8.10    0.80
  -4  24   1    6.70    0.60
   4  24  -1    7.20    0.80
  -4  24   1    7.20    0.80
  -3 -24   1   69.39    3.00
   3 -24  -1   66.79    2.70
   3 -24  -1   76.89    3.00
   3  24  -1   72.39    2.60
  -3  24   1   72.59    2.40
  -3  24   1   74.09    2.70
   3  24  -1   70.29    2.80
  -3  24   1   71.29    2.70
   3  24  -1   78.79    2.80
  -2 -24   1    5.20    0.80
   2 -24  -1    5.20    0.80
   2  24  -1    5.50    0.80
   2  24  -1    4.80    0.70
  -2  24   1    5.10    0.50
  -2  24   1    4.40    0.60
  -2  24   1    5.60    0.70
   2  24  -1    4.70    0.60
  -1 -24   1   26.00    1.60
   1 -24  -1   25.20    1.40
  -1  24   1   29.10    1.40
  -1  24   1   25.50    1.10
   1  24  -1   23.40    1.30
   1  24  -1   26.30    1.30
   1  24  -1   26.60    1.30
  -1  24   1   25.50    1.30
   0 -24  -1    0.00    0.60
   0 -24   1   -0.70    0.50
   0  24  -1   -0.30    0.50
   0  24  -1   -0.20    0.40
   0  24  -1    0.10    0.50
   0  24   1   -0.50    0.30
   0  24   1    0.30    0.50
   0  24   1   -0.30    0.50
   1 -24   1   74.79    2.70
  -1 -24  -1   72.59    3.00
   1 -24   1   77.39    3.10
  -1  24  -1   74.99    2.60
   1  24   1   73.59    2.50
   1  24   1   71.89    2.70
   1  24   1   73.89    2.80
  -1  24  -1   78.69    2.80
  -1  24  -1   76.09    2.80
  -2 -24  -1    0.60    0.50
   2 -24   1    1.60    0.60
   2 -24   1    0.40    0.50
  -2  24  -1    0.40    0.50
   2  24   1    1.70    0.70
   2  24   1    1.30    0.40
   2  24   1    1.60    0.50
  -2  24  -1    1.10    0.50
  -2  24  -1    0.70    0.40
   3 -24   1   36.60    1.70
   3 -24   1   39.60    1.90
  -3 -24  -1   31.90    1.80
  -3  24  -1   34.10    1.60
   3  24   1   36.90    1.60
   3  24   1   36.00    1.50
  -3  24  -1   37.80    1.70
   3  24   1   36.10    1.80
  -3  24  -1   36.80    1.50
  -4 -24  -1   -0.60    0.60
   4 -24   1   -0.10    0.60
   4 -24   1    0.40    0.50
   4  24   1   -0.70    0.40
  -4  24  -1    0.10    0.40
  -4  24  -1    0.20    0.50
   4  24   1    0.50    0.60
   4  24   1   -0.20    0.50
  -4  24  -1   -0.70    0.50
  -5 -24  -1   41.00    2.00
   5 -24   1   37.80    1.80
   5 -24   1   35.40    1.80
  -5  24  -1   38.80    1.80
   5  24   1   35.00    1.80
  -5  24  -1   37.20    1.60
  -5  24  -1   36.60    1.70
   5  24   1   35.40    1.60
   5  24   1   39.60    1.80
   6 -24   1    2.00    0.60
   6 -24   1    1.90    0.70
  -6 -24  -1    2.40    0.80
  -6  24  -1    0.80    0.60
   6  24   1    1.90    0.70
   6  24   1    2.70    0.70
  -6  24  -1    2.00    0.50
  -6  24  -1    2.10    0.70
   6  24   1    2.20    0.60
   7 -24   1    0.60    0.60
  -7 -24  -1    0.60    0.60
   7 -24   1   -0.40    0.60
   7 -24   1   -0.30    0.60
  -7  24  -1   -0.10    0.60
   7  24   1    1.40    0.70
   7  24   1    0.10    0.50
   7  24   1    0.60    0.60
  -7  24  -1    0.10    0.40
   8 -24   1    3.00    0.80
   8 -24   1    4.70    0.90
  -8 -24  -1    2.00    0.80
  -8  24  -1    2.90    0.70
  -8  24  -1    2.50    0.60
   8  24   1    3.30    0.80
   8  24   1    1.90    0.80
   8  24   1    3.70    0.70
   9 -24   1    2.20    0.80
  -9 -24  -1    1.60    0.80
   9 -24   1    1.90    0.80
  -9  24  -1    2.70    0.80
   9  24   1    2.60    0.80
  -9  24  -1    1.70    0.60
   9  24   1    2.00    0.70
   9  24   1    2.10    0.90
  10 -24   1    0.00    0.80
  10 -24   1    0.80    0.80
 -10 -24  -1    0.50    0.80
 -10  24  -1    1.20    0.80
  10  24   1    0.00    0.70
  10  24   1    0.30    0.70
 -10  24  -1    0.50    0.50
  10 -25  -1    2.10    0.90
  10 -25  -1    1.80    0.90
 -10 -25   1    2.90    0.90
 -10  25   1    2.20    0.60
  10  25  -1    2.10    0.90
  10  25  -1    0.80    0.70
 -10  25   1    2.10    0.80
   9 -25  -1    0.20    0.70
   9 -25  -1    0.20    0.80
  -9 -25   1    1.70    0.80
  -9  25   1    1.40    0.70
   9  25  -1   -0.10    0.60
   9  25  -1    1.20    0.80
  -9  25   1    0.50    0.50
   8 -25  -1    2.50    0.80
   8 -25  -1    2.00    0.80
  -8 -25   1    4.60    0.90
   8  25  -1    3.30    0.90
   8  25  -1    2.60    0.70
  -8  25   1    3.10    0.50
  -8  25   1    2.10    0.70
   7 -25  -1   -0.20    0.60
  -7 -25   1    0.10    0.70
   7 -25  -1    1.70    0.70
   7  25  -1   -1.20    0.50
   7  25  -1    0.70    0.70
   7  25  -1    0.10    0.60
  -7  25   1    0.50    0.40
  -7  25   1    0.30    0.60
  -6 -25   1   23.20    1.50
   6 -25  -1   18.50    1.30
   6 -25  -1   20.50    1.40
   6  25  -1   20.30    1.20
  -6  25   1   21.50    1.40
   6  25  -1   18.90    1.40
  -6  25   1   22.30    1.30
   6  25  -1   22.90    1.40
  -6  25   1   20.90    1.00
  -5 -25   1   -0.10    0.60
   5 -25  -1    0.40    0.60
   5 -25  -1    0.90    0.60
   5  25  -1    0.70    0.70
   5  25  -1    1.10    0.70
  -5  25   1    1.00    0.60
  -5  25   1    0.80    0.40
  -5  25   1    0.60    0.60
   5  25  -1    0.10    0.50
   4 -25  -1   12.40    1.10
   4 -25  -1   13.20    1.10
  -4 -25   1   11.20    1.10
   4  25  -1   11.40    1.00
  -4  25   1   11.60    1.00
   4  25  -1   12.90    1.00
  -4  25   1   11.60    0.90
  -4  25   1   11.20    0.80
   4  25  -1   11.50    1.00
   3 -25  -1   37.90    1.90
   3 -25  -1   34.00    1.70
  -3 -25   1   34.40    1.90
   3  25  -1   35.40    1.70
  -3  25   1   36.60    1.40
   3  25  -1   36.00    1.70
   3  25  -1   36.20    1.60
  -3  25   1   37.20    1.80
  -3  25   1   37.30    1.70
   2 -25  -1   22.50    1.40
  -2 -25   1   26.40    1.50
   2  25  -1   24.10    1.20
   2  25  -1   24.50    1.30
   2  25  -1   23.50    1.40
  -2  25   1   22.50    1.40
  -2  25   1   23.30    1.10
  -2  25   1   23.70    1.20
  -1 -25   1    5.40    0.80
   1 -25  -1    5.60    0.80
  -1  25   1    6.00    0.70
   1  25  -1    7.40    0.80
  -1  25   1    5.00    0.50
   1  25  -1    5.60    0.80
   1  25  -1    6.20    0.60
  -1  25   1    6.90    0.80
   0 -25   1    1.10    0.70
   0 -25  -1    0.70    0.70
   0  25  -1    1.40    0.60
   0  25  -1    1.00    0.50
   0  25   1    1.10    0.60
   0  25   1    0.70    0.50
   0  25  -1    1.10    0.60
   0  25   1    1.00    0.40
   1 -25   1    0.90    0.50
   1 -25   1    1.00    0.70
  -1 -25  -1    1.50    0.70
   1  25   1    1.70    0.60
  -1  25  -1    0.90    0.40
  -1  25  -1    1.50    0.60
   1  25   1    1.50    0.60
   1  25   1    1.80    0.40
  -1  25  -1    1.20    0.60
   2 -25   1   27.50    1.60
  -2 -25  -1   24.00    1.50
   2 -25   1   25.80    1.40
   2  25   1   25.00    1.10
  -2  25  -1   25.30    1.40
  -2  25  -1   24.50    1.40
   2  25   1   26.70    1.30
  -2  25  -1   25.00    1.20
   2  25   1   25.80    1.40
   3 -25   1   -0.50    0.60
   3 -25   1    1.50    0.60
  -3 -25  -1    0.20    0.60
   3  25   1    0.20    0.40
  -3  25  -1    0.90    0.40
   3  25   1    0.50    0.60
   3  25   1    0.20    0.50
  -3  25  -1    0.20    0.50
  -3  25  -1    0.60    0.50
  -4 -25  -1   -0.60    0.50
   4 -25   1   -0.20    0.50
   4 -25   1    0.10    0.60
   4  25   1   -0.20    0.40
  -4  25  -1   -0.20    0.50
  -4  25  -1   -0.30    0.50
  -4  25  -1   -0.30    0.40
   4  25   1    0.70    0.60
   4  25   1    0.00    0.60
  -5 -25  -1    3.60    0.80
   5 -25   1    5.00    0.80
   5 -25   1    4.00    0.80
  -5  25  -1    5.70    0.60
   5  25   1    4.30    0.70
  -5  25  -1    4.30    0.70
   5  25   1    5.20    0.60
   5  25   1    4.80    0.80
  -5  25  -1    3.70    0.70
   6 -25   1   -1.20    0.50
   6 -25   1   -0.40    0.50
  -6 -25  -1   -1.60    0.60
  -6  25  -1    0.10    0.60
  -6  25  -1   -0.10    0.40
   6  25   1    0.30    0.70
  -6  25  -1    0.10    0.60
   6  25   1    0.00    0.50
   6  25   1   -0.80    0.60
   7 -25   1    1.10    0.70
   7 -25   1    0.80    0.60
  -7 -25  -1    1.10    0.70
   7 -25   1    0.90    0.70
   7  25   1    0.90    0.50
   7  25   1    0.10    0.70
  -7  25  -1    0.70    0.50
   7  25   1    1.00    0.70
  -7  25  -1    2.50    0.70
   8 -25   1    1.70    0.80
  -8 -25  -1    1.70    0.80
   8 -25   1    3.10    0.80
  -8  25  -1    2.70    0.60
  -8  25  -1    3.30    0.80
   8  25   1    2.00    0.60
   8  25   1    3.30    0.90
   8  25   1    2.40    0.80
   9 -25   1    0.00    0.70
  -9 -25  -1    1.60    0.80
   9 -25   1   -1.00    0.70
   9  25   1   -0.20    0.60
  -9  25  -1    0.20    0.50
  -9  25  -1   -0.90    0.70
   9  25   1    0.20    0.90
 -10 -25  -1   -0.10    0.70
  10 -25   1   -0.50    0.80
  10 -25   1    0.10    0.80
  10  25   1   -0.30    0.60
  10  25   1   -0.10    0.90
 -10  25  -1    0.30    0.50
 -10  25  -1    1.30    0.80
 -10 -26   1    1.00    0.80
  10 -26  -1   -0.80    0.80
  10 -26  -1   -0.90    0.80
 -10  26   1    1.20    0.80
  10  26  -1    1.40    0.70
 -10  26   1   -1.10    0.50
  10  26  -1    0.00    0.80
  -9 -26   1    0.70    0.80
   9 -26  -1    2.90    0.90
   9 -26  -1    1.60    0.90
   9  26  -1    1.80    0.90
   9  26  -1    2.10    0.70
  -9  26   1    2.50    0.80
  -9  26   1    1.50    0.50
  -8 -26   1    0.00    0.70
   8 -26  -1   -0.10    0.70
   8 -26  -1   -0.30    0.70
  -8  26   1   -0.50    0.40
   8  26  -1    0.50    0.80
  -8  26   1    0.00    0.70
   8  26  -1   -0.30    0.60
   7 -26  -1    1.10    0.70
  -7 -26   1    1.20    0.80
   7 -26  -1    0.90    0.70
  -7  26   1    1.20    0.40
  -7  26   1    1.60    0.70
   7  26  -1    1.40    0.80
   7  26  -1    0.00    0.60
   7  26  -1    0.90    0.70
   6 -26  -1    3.90    0.70
   6 -26  -1    3.80    0.80
  -6 -26   1    3.60    0.80
  -6  26   1    4.70    0.50
   6  26  -1    5.40    0.90
   6  26  -1    4.60    0.80
   6  26  -1    3.90    0.70
  -6  26   1    4.60    0.80
  -6  26   1    5.40    0.90
   5 -26  -1    8.30    0.90
  -5 -26   1    9.50    1.10
   5 -26  -1    7.90    1.00
  -5  26   1    8.10    0.90
   5  26  -1    8.50    0.80
  -5  26   1    7.40    0.60
   5  26  -1    9.60    1.00
  -5  26   1    9.10    1.00
   5  26  -1    6.80    0.90
   4 -26  -1    5.40    0.80
  -4 -26   1    4.90    0.90
   4 -26  -1    6.00    0.80
  -4  26   1    4.60    0.80
   4  26  -1    5.60    0.80
  -4  26   1    4.90    0.50
   4  26  -1    5.30    0.70
   4  26  -1    6.00    0.90
  -4  26   1    4.90    0.70
   3 -26  -1    1.20    0.60
  -3 -26   1    0.80    0.70
   3 -26  -1    0.30    0.60
   3  26  -1    1.70    0.50
   3  26  -1    1.20    0.60
   3  26  -1    2.00    0.70
  -3  26   1    1.20    0.50
  -3  26   1    1.60    0.70
  -3  26   1    1.10    0.40
  -2 -26   1    2.00    0.60
   2 -26  -1    2.10    0.70
   2  26  -1    1.00    0.50
  -2  26   1    2.10    0.70
  -2  26   1    1.80    0.40
   2  26  -1    2.00    0.60
   2  26  -1    1.70    0.70
  -2  26   1    1.30    0.60
  -1 -26   1   -0.20    0.60
   1 -26  -1    0.80    0.60
  -1  26   1    0.10    0.60
  -1  26   1    0.90    0.40
   1  26  -1   -0.50    0.50
   1  26  -1    0.20    0.60
   1  26  -1    0.90    0.40
  -1  26   1    0.60    0.50
   0 -26   1   31.70    1.80
   0 -26  -1   31.30    1.80
   0  26  -1   31.70    1.60
   0  26  -1   30.70    1.60
   0  26   1   29.40    1.60
   0  26   1   31.10    1.30
   0  26   1   32.90    1.50
   0  26  -1   30.20    1.40
   1 -26   1   11.40    1.10
  -1 -26  -1   13.60    1.20
   1 -26   1   12.20    0.90
   1  26   1   14.00    0.80
  -1  26  -1   13.60    0.90
  -1  26  -1   11.70    1.00
   1  26   1   13.90    1.00
   1  26   1   12.20    1.10
  -1  26  -1   13.90    1.00
   2 -26   1    6.80    0.90
  -2 -26  -1    8.20    0.90
   2 -26   1    8.20    1.00
   2  26   1    8.20    0.90
  -2  26  -1    7.80    0.80
  -2  26  -1    7.80    0.90
  -2  26  -1    6.70    0.60
   2  26   1    7.40    0.60
   2  26   1    8.30    0.80
   3 -26   1    2.20    0.60
  -3 -26  -1    0.80    0.70
   3 -26   1    1.20    0.70
   3  26   1    1.60    0.60
  -3  26  -1    2.60    0.70
  -3  26  -1    1.70    0.50
   3  26   1    1.60    0.40
   3  26   1    1.80    0.70
  -3  26  -1    2.70    0.60
   4 -26   1   -0.60    0.60
   4 -26   1   -0.50    0.50
  -4 -26  -1    0.40    0.60
   4  26   1   -0.90    0.40
  -4  26  -1    0.00    0.40
  -4  26  -1    0.10    0.60
  -4  26  -1   -0.30    0.60
   4  26   1   -0.50    0.60
   4  26   1   -0.30    0.60
  -5 -26  -1    0.40    0.70
   5 -26   1    0.60    0.60
   5 -26   1    0.50    0.60
   5  26   1    0.30    0.60
   5  26   1    0.70    0.40
   5  26   1   -0.40    0.70
  -5  26  -1    0.60    0.60
  -5  26  -1    0.40    0.60
  -5  26  -1    1.00    0.40
   6 -26   1    0.00    0.60
   6 -26   1   -0.40    0.60
  -6 -26  -1   -0.30    0.60
   6  26   1    0.20    0.60
   6  26   1   -0.50    0.40
   6  26   1    2.00    0.80
  -6  26  -1   -0.30    0.60
  -6  26  -1    0.00    0.40
  -6  26  -1    0.50    0.60
   7 -26   1    1.00    0.70
   7 -26   1   -0.10    0.70
  -7 -26  -1    0.40    0.70
  -7  26  -1   -0.30    0.60
  -7  26  -1    0.90    0.50
   7  26   1    0.60    0.70
   7  26   1   -0.10    0.50
   7  26   1    0.10    0.70
   8 -26   1    0.90    0.70
   8 -26   1    0.40    0.70
  -8 -26  -1   -0.70    0.50
   8  26   1   -0.60    0.70
   8  26   1    0.30    0.60
  -8  26  -1   -0.30    0.50
   8  26   1    0.80    0.80
  -8  26  -1    1.00    0.70
   9 -26   1    2.90    1.00
   9 -26   1    3.30    1.00
  -9 -26  -1    5.30    1.00
   9  26   1    2.90    0.70
  -9  26  -1    4.70    0.90
  -9  26  -1    4.50    0.70
   9  26   1    3.60    1.00
 -10 -26  -1    2.10    0.90
  10 -26   1    0.90    0.90
  10 -26   1    3.70    1.10
 -10  26  -1    1.00    0.60
  10  26   1    2.10    1.00
  10  26   1    2.30    0.70
 -10  26  -1    1.50    0.80
   9 -27  -1    1.20    0.80
   9 -27  -1   -0.10    0.80
  -9 -27   1    0.60    0.80
  -9  27   1    1.00    0.50
  -9  27   1    0.40    0.70
   9  27  -1   -0.10    0.70
   9  27  -1    0.90    0.90
   8 -27  -1   -0.40    0.70
  -8 -27   1    0.10    0.80
   8 -27  -1    0.70    0.70
   8  27  -1    0.10    0.80
  -8  27   1    0.00    0.70
  -8  27   1   -0.10    0.40
   8  27  -1   -1.30    0.60
   7 -27  -1    1.10    0.70
  -7 -27   1    3.10    0.90
  -7  27   1    3.00    0.50
   7  27  -1    3.30    0.70
   7  27  -1    1.90    0.80
  -7  27   1    2.60    0.80
   7  27  -1    1.90    0.80
   6 -27  -1   13.50    1.20
   6 -27  -1   13.20    1.10
  -6 -27   1   10.60    1.20
   6  27  -1   12.70    1.20
   6  27  -1   14.10    1.20
  -6  27   1   12.50    1.10
  -6  27   1   12.50    1.20
  -6  27   1   14.40    0.90
   6  27  -1   11.40    1.00
   5 -27  -1    1.20    0.60
  -5 -27   1    1.10    0.70
   5 -27  -1    0.90    0.70
  -5  27   1    0.70    0.60
   5  27  -1    1.70    0.70
   5  27  -1    1.20    0.70
   5  27  -1    1.30    0.60
  -5  27   1    0.70    0.70
  -5  27   1    0.90    0.40
   4 -27  -1   13.20    1.20
  -4 -27   1   13.20    1.30
   4 -27  -1   12.20    1.10
   4  27  -1   13.00    1.10
  -4  27   1   12.10    1.00
  -4  27   1   13.70    0.80
   4  27  -1   12.40    1.10
  -4  27   1   12.50    1.10
   4  27  -1   10.80    0.90
   3 -27  -1   -1.30    0.60
   3 -27  -1    0.10    0.60
  -3 -27   1    0.20    0.50
   3  27  -1   -0.10    0.60
  -3  27   1    0.30    0.40
  -3  27   1    0.40    0.60
  -3  27   1    0.10    0.60
   3  27  -1    0.20    0.50
   3  27  -1    0.50    0.70
   2 -27  -1    1.60    0.70
  -2 -27   1    1.70    0.70
  -2  27   1    0.30    0.60
   2  27  -1    0.90    0.60
  -2  27   1    1.20    0.40
   2  27  -1    1.70    0.60
   2  27  -1    0.80    0.50
  -2  27   1    1.40    0.60
   1 -27  -1    0.30    0.50
  -1 -27   1    0.10    0.60
   1  27  -1   -0.70    0.50
  -1  27   1    0.60    0.60
   1  27  -1   -0.30    0.40
  -1  27   1    0.00    0.50
  -1  27   1    0.00    0.40
   1  27  -1    0.00    0.60
   0 -27   1   18.10    1.30
   0 -27  -1   18.50    1.30
   0  27  -1   17.40    1.00
   0  27   1   18.90    1.20
   0  27  -1   19.60    1.30
   0  27   1   20.10    1.30
   0  27  -1   19.80    1.20
   0  27   1   19.40    1.00
   1 -27   1    1.40    0.60
  -1 -27  -1    1.00    0.70
   1  27   1    2.40    0.50
  -1  27  -1    1.40    0.60
   1  27   1    1.20    0.70
  -1  27  -1    1.80    0.60
   1  27   1    2.50    0.60
  -1  27  -1    1.10    0.40
   2 -27   1   -0.30    0.60
  -2 -27  -1    0.30    0.60
   2 -27   1   -0.10    0.50
  -2  27  -1   -0.40    0.40
  -2  27  -1   -0.40    0.60
   2  27   1    0.10    0.50
   2  27   1    0.30    0.60
  -2  27  -1   -0.30    0.60
   2  27   1   -0.50    0.40
  -3 -27  -1    1.20    0.60
   3 -27   1    1.30    0.60
   3 -27   1    1.00    0.60
  -3  27  -1    1.10    0.50
   3  27   1    2.00    0.60
   3  27   1    1.90    0.50
   3  27   1    1.60    0.70
  -3  27  -1    1.70    0.60
  -3  27  -1    3.40    0.70
  -4 -27  -1   -0.10    0.70
   4 -27   1   -0.30    0.60
   4 -27   1    0.80    0.60
   4  27   1   -0.30    0.70
  -4  27  -1    1.10    0.60
   4  27   1    0.20    0.60
  -4  27  -1   -0.40    0.40
   4  27   1   -0.30    0.40
  -4  27  -1   -0.80    0.50
   5 -27   1    1.60    0.70
   5 -27   1    1.40    0.70
  -5 -27  -1    1.60    0.80
   5  27   1    1.70    0.70
  -5  27  -1    1.40    0.70
   5  27   1    0.50    0.50
  -5  27  -1    0.90    0.60
   5  27   1    0.60    0.70
  -5  27  -1    1.30    0.50
   6 -27   1    4.40    0.80
   6 -27   1    3.80    0.80
  -6 -27  -1    4.00    0.90
  -6  27  -1    3.90    0.80
   6  27   1    4.30    0.90
  -6  27  -1    4.40    0.80
   6  27   1    4.40    0.60
   6  27   1    4.30    0.90
  -6  27  -1    4.60    0.60
   7 -27   1    6.50    1.00
  -7 -27  -1    4.80    0.90
   7 -27   1    6.40    0.90
   7  27   1    6.10    0.70
   7  27   1    6.40    0.90
  -7  27  -1    5.40    0.90
  -7  27  -1    5.40    0.70
   7  27   1    6.00    1.00
   8 -27   1   -0.40    0.70
  -8 -27  -1   -0.10    0.70
   8 -27   1   -0.80    0.70
   8  27   1    0.20    0.70
  -8  27  -1   -0.20    0.50
  -8  27  -1   -0.20    0.70
   8  27   1    0.00    0.80
   8  27   1   -0.50    0.50
   9 -27   1    0.40    0.80
   9 -27   1    0.70    0.80
  -9 -27  -1    0.80    0.80
  -9  27  -1    0.00    0.50
   9  27   1    0.10    0.60
  -9  27  -1    0.60    0.80
   9  27   1   -0.30    0.90
   9 -28  -1    1.60    0.90
   9 -28  -1    1.50    0.90
  -9 -28   1    0.80    0.80
   9  28  -1    0.30    0.90
  -9  28   1    1.00    0.80
  -9  28   1    0.60    0.50
   9  28  -1    1.00    0.70
  -8 -28   1    3.80    1.00
   8 -28  -1    1.70    0.90
   8 -28  -1    4.50    1.00
  -8  28   1    3.20    0.90
   8  28  -1    4.10    1.00
  -8  28   1    4.20    0.60
   8  28  -1    2.80    0.80
   7 -28  -1    0.80    0.70
  -7 -28   1   -0.60    0.70
  -7  28   1    0.60    0.40
  -7  28   1    0.50    0.70
   7  28  -1   -1.30    0.50
   7  28  -1   -0.50    0.70
   7  28  -1   -1.30    0.70
   6 -28  -1   -0.70    0.60
  -6 -28   1    0.40    0.60
   6 -28  -1   -1.00    0.60
  -6  28   1    0.70    0.70
  -6  28   1    0.10    0.40
   6  28  -1   -0.40    0.70
  -6  28   1   -0.60    0.60
   6  28  -1    0.90    0.60
   6  28  -1   -0.10    0.70
  -5 -28   1    3.10    0.90
   5 -28  -1    3.40    0.70
   5 -28  -1    4.20    0.90
   5  28  -1    3.70    0.80
   5  28  -1    4.40    0.90
   5  28  -1    4.10    0.70
  -5  28   1    3.50    0.80
  -5  28   1    3.60    0.70
  -5  28   1    3.80    0.50
  -4 -28   1    7.00    1.00
   4 -28  -1    7.30    1.00
   4 -28  -1    6.40    0.90
  -4  28   1    6.90    0.90
  -4  28   1    6.50    0.60
   4  28  -1    8.10    0.90
   4  28  -1    6.60    0.90
  -4  28   1    6.10    0.80
   4  28  -1    6.30    0.80
   3 -28  -1   -0.40    0.60
  -3 -28   1    0.20    0.60
   3 -28  -1    0.80    0.60
   3  28  -1    0.20    0.60
   3  28  -1   -0.50    0.60
  -3  28   1    0.00    0.60
  -3  28   1   -0.20    0.30
  -3  28   1   -0.60    0.60
   3  28  -1    0.70    0.50
   2 -28  -1    2.40    0.70
   2 -28  -1    2.10    0.70
  -2 -28   1    2.80    0.80
  -2  28   1    1.90    0.70
  -2  28   1    3.40    0.70
   2  28  -1    3.20    0.70
   2  28  -1    1.50    0.50
  -2  28   1    2.00    0.40
   2  28  -1    2.90    0.70
  -1 -28   1    0.60    0.70
   1 -28  -1    0.10    0.60
  -1  28   1    0.50    0.60
  -1  28   1    0.90    0.60
   1  28  -1    0.40    0.60
  -1  28   1    0.50    0.40
   1  28  -1    0.20    0.40
   1  28  -1    0.40    0.60
   0 -28   1   40.90    2.10
   0 -28   1   40.80    1.80
   0 -28  -1   38.10    2.00
   0  28  -1   36.80    1.60
   0  28   1   37.70    1.90
   0  28  -1   38.30    1.80
   0  28   1   38.30    1.80
   0  28  -1   37.70    1.80
   0  28   1   37.00    1.50
  -1 -28  -1    0.10    0.70
   1 -28   1    1.50    0.60
   1  28   1    0.20    0.70
  -1  28  -1    0.80    0.60
   1  28   1    0.30    0.60
  -1  28  -1    0.00    0.60
  -1  28  -1    0.10    0.40
   1  28   1    0.40    0.40
   2 -28   1    5.40    0.80
   2 -28   1    5.20    0.90
  -2 -28  -1    4.00    0.90
  -2  28  -1    5.10    0.80
   2  28   1    3.00    0.70
   2  28   1    3.80    0.50
  -2  28  -1    4.30    0.80
   2  28   1    4.80    0.80
  -2  28  -1    4.80    0.60
  -3 -28  -1    1.20    0.60
   3 -28   1   -0.30    0.60
   3 -28   1    0.40    0.60
  -3  28  -1    0.20    0.60
  -3  28  -1    1.00    0.50
  -3  28  -1    1.10    0.60
   3  28   1    1.40    0.70
   3  28   1   -0.20    0.40
   3  28   1    0.80    0.60
  -4 -28  -1   -1.00    0.60
   4 -28   1   -0.90    0.60
   4 -28   1   -0.50    0.60
   4  28   1   -1.10    0.70
  -4  28  -1    0.70    0.40
   4  28   1   -0.20    0.60
  -4  28  -1   -0.10    0.60
   4  28   1   -0.20    0.40
  -4  28  -1    0.30    0.70
   5 -28   1    0.60    0.70
   5 -28   1    0.30    0.70
  -5 -28  -1    2.70    0.80
  -5  28  -1    2.00    0.70
  -5  28  -1    1.80    0.50
   5  28   1    1.90    0.70
   5  28   1    2.00    0.80
  -5  28  -1    2.20    0.70
   5  28   1    0.80    0.50
   6 -28   1    2.90    0.80
  -6 -28  -1    2.30    0.90
   6 -28   1    2.20    0.80
  -6  28  -1    2.40    0.60
  -6  28  -1    3.60    0.80
   6  28   1    2.60    0.60
  -6  28  -1    2.30    0.80
   6  28   1    4.20    0.80
   6  28   1    3.80    0.90
   7 -28   1    1.10    0.70
   7 -28   1    0.50    0.80
  -7 -28  -1    2.20    0.90
   7  28   1    1.10    0.80
   7  28   1    0.80    0.50
  -7  28  -1    0.50    0.50
  -7  28  -1    1.30    0.70
   7  28   1    0.60    0.70
   8 -28   1   -0.40    0.70
   8 -28   1    0.30    0.70
  -8 -28  -1    0.20    0.80
   8  28   1   -0.30    0.80
  -8  28  -1   -0.80    0.50
  -8  28  -1   -1.20    0.70
   8  28   1   -0.80    0.50
   8  28   1   -0.10    0.80
   9 -28   1    1.40    0.90
  -9 -28  -1   -1.50    0.80
   9 -28   1   -0.80    0.80
  -9  28  -1    1.00    0.80
  -9  28  -1   -0.90    0.50
   9  28   1   -0.50    0.60
   9  28   1    0.70    0.90
   8 -29  -1   11.20    1.30
  -8 -29   1   10.00    1.30
   8 -29  -1    9.60    1.20
   8  29  -1    7.90    1.20
   8  29  -1    8.50    1.00
  -8  29   1   10.00    0.70
  -8  29   1   10.30    1.20
  -7 -29   1    8.60    1.20
   7 -29  -1    8.50    1.10
   7  29  -1    7.00    1.10
  -7  29   1    7.60    0.70
   7  29  -1    7.90    0.90
  -7  29   1    7.50    1.00
   6 -29  -1    0.20    0.60
  -6 -29   1    0.90    0.70
   6 -29  -1   -0.90    0.70
   6  29  -1    0.70    0.60
   6  29  -1    0.80    0.70
  -6  29   1    0.30    0.60
  -6  29   1   -0.90    0.70
  -6  29   1   -0.30    0.40
   6  29  -1    0.10    0.70
   5 -29  -1    4.30    0.90
   5 -29  -1    3.40    0.80
  -5 -29   1    4.20    0.90
  -5  29   1    4.60    0.90
   5  29  -1    4.20    0.90
   5  29  -1    4.90    0.90
  -5  29   1    4.60    0.50
   5  29  -1    5.70    0.80
  -5  29   1    4.90    0.80
   4 -29  -1    0.60    0.70
   4 -29  -1    3.00    0.80
  -4 -29   1    2.20    0.70
   4  29  -1    1.80    0.70
  -4  29   1    0.30    0.70
  -4  29   1    1.00    0.60
   4  29  -1    1.00    0.60
   4  29  -1    3.30    0.80
  -4  29   1    1.50    0.40
   3 -29  -1    1.10    0.70
   3 -29  -1    1.60    0.70
  -3 -29   1    1.70    0.80
   3  29  -1    0.30    0.60
  -3  29   1    1.30    0.70
  -3  29   1    0.10    0.60
   3  29  -1    0.80    0.50
   3  29  -1    1.50    0.70
  -3  29   1    0.50    0.40
   2 -29  -1    2.10    0.70
  -2 -29   1    2.80    0.70
   2 -29  -1    3.00    0.80
   2  29  -1    2.20    0.70
  -2  29   1    2.20    0.60
   2  29  -1    3.40    0.60
  -2  29   1    3.60    0.80
  -2  29   1    3.10    0.50
   2  29  -1    3.60    0.80
   1 -29  -1    1.60    0.80
  -1 -29   1    1.00    0.70
  -1  29   1    0.70    0.70
   1  29  -1    0.70    0.50
   1  29  -1    0.20    0.60
   1  29  -1    0.50    0.70
  -1  29   1    1.40    0.40
  -1  29   1    0.60    0.60
   0 -29  -1    7.20    0.90
   0 -29   1    6.60    1.00
   0  29  -1    5.50    0.80
   0  29   1    5.80    0.90
   0  29  -1    5.90    0.90
   0  29  -1    7.00    0.70
   0  29   1    5.50    0.80
   0  29   1    5.80    0.60
  -1 -29  -1    0.80    0.70
   1 -29   1    0.00    0.70
  -1  29  -1   -0.10    0.60
   1  29   1    0.10    0.70
  -1  29  -1    0.70    0.60
  -1  29  -1   -0.70    0.40
   1  29   1    0.10    0.60
   1  29   1    0.10    0.40
  -2 -29  -1    1.30    0.70
   2 -29   1    1.90    0.80
   2 -29   1    0.20    0.60
  -2  29  -1    0.60    0.50
  -2  29  -1    1.40    0.70
  -2  29  -1    0.50    0.60
   2  29   1    1.50    0.70
   2  29   1    0.20    0.60
   2  29   1    0.90    0.40
   3 -29   1    3.90    0.80
  -3 -29  -1    5.10    0.90
   3 -29   1    5.30    0.90
   3  29   1    4.00    0.80
  -3  29  -1    4.90    0.90
   3  29   1    4.50    0.90
  -3  29  -1    5.10    0.60
   3  29   1    4.50    0.60
  -3  29  -1    6.00    0.80
   4 -29   1    0.00    0.60
   4 -29   1    0.40    0.70
  -4 -29  -1    0.40    0.60
  -4  29  -1   -0.30    0.60
  -4  29  -1   -0.60    0.40
   4  29   1   -0.10    0.40
  -4  29  -1    0.30    0.60
   4  29   1   -0.30    0.60
   4  29   1   -0.60    0.70
   5 -29   1   -0.30    0.60
  -5 -29  -1    1.30    0.70
   5 -29   1    0.40    0.60
  -5  29  -1   -0.10    0.60
  -5  29  -1   -0.40    0.60
   5  29   1   -0.50    0.60
   5  29   1   -0.10    0.50
   5  29   1   -0.20    0.70
  -5  29  -1    0.10    0.40
   6 -29   1    0.40    0.70
  -6 -29  -1    0.50    0.70
   6 -29   1   -0.70    0.60
  -6  29  -1    0.40    0.50
[truncated: 3,579,069 more chars]
