# Supplementary material for: π-Stacking Stopper-Macrocycle Stabilized Dynamically Interlocked [2]Rotaxanes
Source: Molecules. 2021 Aug 3;26(15):4704. doi: 10.3390/molecules26154704 (PMC8347712; doi:10.3390/molecules26154704)
Supplement: Supplementary file 1 [file molecules-26-04704-s001.zip › 9.cif]

data_9HPF6
_audit_creation_date               2020-07-16
_audit_creation_method
;
Olex2 1.2
(compiled 2018.05.29 svn.r3508 for OlexSys, GUI svn.r5506)
;
_shelx_SHELXL_version_number       '2018/3'
_audit_contact_author_address      ?
_audit_contact_author_email        ?
_audit_contact_author_name         ''
_audit_contact_author_phone        ?
_publ_contact_author_id_orcid      ?
_publ_section_references
;
Dolomanov, O.V., Bourhis, L.J., Gildea, R.J, Howard, J.A.K. & Puschmann, H.
 (2009), J. Appl. Cryst. 42, 339-341.

Sheldrick, G.M. (2015). Acta Cryst. A71, 3-8.

Sheldrick, G.M. (2015). Acta Cryst. C71, 3-8.
;
_chemical_name_common              ?
_chemical_name_systematic          ?
_chemical_formula_moiety           'F6 P, C24 H24 N O2, C32 H28 N4 O4'
_chemical_formula_sum              'C56 H53 F6 N5 O6 P'
_chemical_formula_weight           1037.00
_chemical_melting_point            ?
loop_
  _atom_type_symbol
  _atom_type_description
  _atom_type_scat_dispersion_real
  _atom_type_scat_dispersion_imag
  _atom_type_scat_source
 'C' 'C' 0.0033 0.0016 'International Tables Vol C Tables 4.2.6.8 and 6.1.1.4'
 'H' 'H' 0.0000 0.0000 'International Tables Vol C Tables 4.2.6.8 and 6.1.1.4'
 'F' 'F' 0.0171 0.0103 'International Tables Vol C Tables 4.2.6.8 and 6.1.1.4'
 'N' 'N' 0.0061 0.0033 'International Tables Vol C Tables 4.2.6.8 and 6.1.1.4'
 'O' 'O' 0.0106 0.0060 'International Tables Vol C Tables 4.2.6.8 and 6.1.1.4'
 'P' 'P' 0.1023 0.0942 'International Tables Vol C Tables 4.2.6.8 and 6.1.1.4'

_shelx_space_group_comment
;
The symmetry employed for this shelxl refinement is uniquely defined
by the following loop, which should always be used as a source of
symmetry information in preference to the above space-group names.
They are only intended as comments.
;
_space_group_crystal_system        'monoclinic'
_space_group_IT_number             15
_space_group_name_H-M_alt          'C 1 2/c 1'
_space_group_name_Hall             '-C 2yc'
loop_
  _space_group_symop_operation_xyz
 'x, y, z'
 '-x, y, -z+1/2'
 'x+1/2, y+1/2, z'
 '-x+1/2, y+1/2, -z+1/2'
 '-x, -y, -z'
 'x, -y, z-1/2'
 '-x+1/2, -y+1/2, -z'
 'x+1/2, -y+1/2, z-1/2'

_cell_length_a                     28.716(16)
_cell_length_b                     11.944(7)
_cell_length_c                     33.560(19)
_cell_angle_alpha                  90
_cell_angle_beta                   108.951(10)
_cell_angle_gamma                  90
_cell_volume                       10887(11)
_cell_formula_units_Z              8
_cell_measurement_reflns_used      8949
_cell_measurement_temperature      173
_cell_measurement_theta_max        27.48
_cell_measurement_theta_min        2.40
_shelx_estimated_absorpt_T_max     0.976
_shelx_estimated_absorpt_T_min     0.952
_exptl_absorpt_coefficient_mu      0.124
_exptl_absorpt_correction_T_max    0.7456
_exptl_absorpt_correction_T_min    0.6927
_exptl_absorpt_correction_type     multi-scan
_exptl_absorpt_process_details
;
SADABS-2008/1 (Bruker,2008) was used for absorption correction.
wR2(int) was 0.0568 before and 0.0465 after correction.
The Ratio of minimum to maximum transmission is 0.9291.
The \l/2 correction factor is 0.0015.
;
_exptl_absorpt_special_details     ?
_exptl_crystal_colour              'clear light yellow'
_exptl_crystal_colour_lustre       clear
_exptl_crystal_colour_modifier     light
_exptl_crystal_colour_primary      yellow
_exptl_crystal_density_diffrn      1.265
_exptl_crystal_density_meas        ?
_exptl_crystal_density_method      ?
_exptl_crystal_description         needle
_exptl_crystal_F_000               4328
_exptl_crystal_size_max            0.4
_exptl_crystal_size_mid            0.3
_exptl_crystal_size_min            0.2
_exptl_transmission_factor_max     ?
_exptl_transmission_factor_min     ?
_diffrn_reflns_av_R_equivalents    0.0423
_diffrn_reflns_av_unetI/netI       0.0162
_diffrn_reflns_Laue_measured_fraction_full  1.000
_diffrn_reflns_Laue_measured_fraction_max  1.000
_diffrn_reflns_limit_h_max         35
_diffrn_reflns_limit_h_min         -35
_diffrn_reflns_limit_k_max         14
_diffrn_reflns_limit_k_min         -14
_diffrn_reflns_limit_l_max         41
_diffrn_reflns_limit_l_min         -41
_diffrn_reflns_number              170974
_diffrn_reflns_point_group_measured_fraction_full  1.000
_diffrn_reflns_point_group_measured_fraction_max  1.000
_diffrn_reflns_theta_full          25.242
_diffrn_reflns_theta_max           26.371
_diffrn_reflns_theta_min           1.283
_diffrn_ambient_temperature        173
_diffrn_detector                   'Bruker APEX2 area detector'
_diffrn_detector_area_resol_mean   7.9
_diffrn_detector_type              'CCD area detector'
_diffrn_measured_fraction_theta_full  1.000
_diffrn_measured_fraction_theta_max  1.000
_diffrn_measurement_device         'three-circle diffractometer'
_diffrn_measurement_device_type    'Bruker SMART APEX2 area detector'
_diffrn_measurement_method         '\w and \f scans'
_diffrn_radiation_monochromator    'mirror optics'
_diffrn_radiation_probe            x-ray
_diffrn_radiation_type             MoK\a
_diffrn_radiation_wavelength       0.71073
_diffrn_source                     'microfocus sealed X-ray tube'
_diffrn_source_type                'Incoatec I\ms'
_diffrn_standards_number           0
_reflns_Friedel_coverage           0.000
_reflns_Friedel_fraction_full      .
_reflns_Friedel_fraction_max       .
_reflns_number_gt                  9309
_reflns_number_total               11142
_reflns_special_details
;
 Reflections were merged by SHELXL according to the crystal
 class for the calculation of statistics and refinement.
 
 Structure factors included contributions from the .fab file.
 
 _reflns_Friedel_fraction is defined as the number of unique
 Friedel pairs measured divided by the number that would be
 possible theoretically, ignoring centric projections and
 systematic absences.
;
_reflns_threshold_expression       'I > 2\s(I)'
_computing_cell_refinement         'SAINT V8.18C (?, 2016)'
_computing_data_collection         ?
_computing_data_reduction          'SAINT V8.18C (?, 2016)'
_computing_molecular_graphics      'Olex2 (Dolomanov et al., 2009)'
_computing_publication_material    'Olex2 (Dolomanov et al., 2009)'
_computing_structure_refinement    'ShelXL (Sheldrick, 2015)'
_computing_structure_solution      'ShelXT (Sheldrick, 2015)'
_refine_diff_density_max           1.382
_refine_diff_density_min           -0.691
_refine_diff_density_rms           0.068
_refine_ls_extinction_coef         .
_refine_ls_extinction_method       none
_refine_ls_goodness_of_fit_ref     1.045
_refine_ls_hydrogen_treatment      constr
_refine_ls_matrix_type             full
_refine_ls_number_parameters       669
_refine_ls_number_reflns           11142
_refine_ls_number_restraints       0
_refine_ls_R_factor_all            0.0792
_refine_ls_R_factor_gt             0.0686
_refine_ls_restrained_S_all        1.045
_refine_ls_shift/su_max            0.001
_refine_ls_shift/su_mean           0.000
_refine_ls_structure_factor_coef   Fsqd
_refine_ls_weighting_details      
 'w=1/[\s^2^(Fo^2^)+(0.1063P)^2^+27.2861P] where P=(Fo^2^+2Fc^2^)/3'
_refine_ls_weighting_scheme        calc
_refine_ls_wR_factor_gt            0.1950
_refine_ls_wR_factor_ref           0.2069
_refine_special_details            ?
_olex2_refinement_description
;
1. Fixed Uiso
 At 1.2 times of:
  All C(H) groups, All C(H,H) groups, All N(H,H) groups
 At 1.5 times of:
  All C(H,H,H) groups
2.a Secondary CH2 refined with riding coordinates:
 N1(H1A,H1B), C7(H7A,H7B), C8(H8A,H8B), C51(H51A,H51B), C52(H52A,H52B),
 C53(H53A,H53B), C54(H54A,H54B), C55(H55A,H55B), C56(H56A,H56B)
2.b Aromatic/amide H refined with riding coordinates:
 C2(H2), C4(H4), C6(H6), C11(H11), C12(H12), C13(H13), C14(H14), C16(H16),
 C18(H18), C19(H19), C20(H20), C21(H21), C26(H26), C27(H27), C28(H28), C29(H29),
  C31(H31), C33(H33), C34(H34), C38(H38), C39(H39), C41(H41), C42(H42),
 C44(H44), C46(H46), C47(H47), C48(H48), C49(H49)
2.c Idealised Me refined as rotating group:
 C23(H23A,H23B,H23C), C24(H24A,H24B,H24C)
;
_atom_sites_solution_hydrogens     geom
_atom_sites_solution_primary       dual
_atom_sites_solution_secondary     ?
loop_
  _atom_site_label
  _atom_site_type_symbol
  _atom_site_fract_x
  _atom_site_fract_y
  _atom_site_fract_z
  _atom_site_U_iso_or_equiv
  _atom_site_adp_type
  _atom_site_occupancy
  _atom_site_site_symmetry_order
  _atom_site_calc_flag
  _atom_site_refinement_flags_posn
  _atom_site_refinement_flags_adp
  _atom_site_refinement_flags_occupancy
  _atom_site_disorder_assembly
  _atom_site_disorder_group
 P1 P 0.48091(3) 0.07439(7) 0.61618(3) 0.0476(2) Uani 1 1 d . . . . .
 F1 F 0.44386(16) 0.0884(3) 0.57226(11) 0.1533(17) Uani 1 1 d . . . . .
 F2 F 0.51627(10) -0.0015(2) 0.59993(11) 0.1020(10) Uani 1 1 d . . . . .
 F3 F 0.51106(10) 0.18249(19) 0.61393(9) 0.0875(8) Uani 1 1 d . . . . .
 F4 F 0.52068(13) 0.0537(4) 0.66166(9) 0.1320(14) Uani 1 1 d . . . . .
 F5 F 0.44798(13) 0.1409(3) 0.63631(16) 0.165(2) Uani 1 1 d . . . . .
 F6 F 0.45267(10) -0.0373(2) 0.61936(14) 0.1258(13) Uani 1 1 d . . . . .
 O1 O 0.66028(7) 0.46780(19) 0.78239(5) 0.0441(5) Uani 1 1 d . . . . .
 O2 O 0.52355(6) 0.4594(2) 0.65096(6) 0.0460(5) Uani 1 1 d . . . . .
 O3 O 0.74734(6) 0.24448(16) 0.68766(5) 0.0348(4) Uani 1 1 d . . . . .
 O4 O 0.81746(7) 0.3765(2) 0.66419(7) 0.0551(6) Uani 1 1 d . . . . .
 O5 O 0.81431(8) 0.59083(18) 0.63127(8) 0.0520(5) Uani 1 1 d . . . . .
 O6 O 0.73112(6) 0.74175(16) 0.61105(6) 0.0381(4) Uani 1 1 d . . . . .
 N1 N 0.67466(7) 0.44170(16) 0.60754(6) 0.0236(4) Uani 1 1 d . . . . .
 H1A H 0.648535 0.480906 0.590606 0.028 Uiso 1 1 calc R . . . .
 H1B H 0.664418 0.370603 0.609814 0.028 Uiso 1 1 calc R . . . .
 N2 N 0.63551(7) 0.68694(16) 0.58632(6) 0.0269(4) Uani 1 1 d . . . . .
 N3 N 0.58408(7) 0.51552(15) 0.53475(6) 0.0232(4) Uani 1 1 d . . . . .
 N4 N 0.59469(7) 0.29450(16) 0.55849(6) 0.0242(4) Uani 1 1 d . . . . .
 N5 N 0.65042(7) 0.23014(16) 0.64019(6) 0.0254(4) Uani 1 1 d . . . . .
 C1 C 0.63947(9) 0.4700(2) 0.73910(7) 0.0303(5) Uani 1 1 d . . . . .
 C2 C 0.58902(9) 0.4615(2) 0.71848(7) 0.0323(5) Uani 1 1 d . . . . .
 H2 H 0.566593 0.452754 0.733747 0.039 Uiso 1 1 calc R . . . .
 C3 C 0.57253(8) 0.4662(2) 0.67438(7) 0.0301(5) Uani 1 1 d . . . . .
 C4 C 0.60463(8) 0.4802(2) 0.65164(7) 0.0279(5) Uani 1 1 d . . . . .
 H4 H 0.592443 0.485530 0.621788 0.033 Uiso 1 1 calc R . . . .
 C5 C 0.65494(8) 0.48621(18) 0.67303(7) 0.0244(4) Uani 1 1 d . . . . .
 C6 C 0.67235(9) 0.4807(2) 0.71687(7) 0.0282(5) Uani 1 1 d . . . . .
 H6 H 0.706724 0.484354 0.731514 0.034 Uiso 1 1 calc R . . . .
 C7 C 0.69212(8) 0.49463(19) 0.65010(7) 0.0258(5) Uani 1 1 d . . . . .
 H7A H 0.699438 0.574562 0.647050 0.031 Uiso 1 1 calc R . . . .
 H7B H 0.723081 0.457946 0.667184 0.031 Uiso 1 1 calc R . . . .
 C8 C 0.71478(8) 0.4391(2) 0.58798(7) 0.0313(5) Uani 1 1 d . . . . .
 H8A H 0.744091 0.402094 0.607718 0.038 Uiso 1 1 calc R . . . .
 H8B H 0.724073 0.516898 0.583773 0.038 Uiso 1 1 calc R . . . .
 C9 C 0.70040(8) 0.3783(2) 0.54616(7) 0.0311(5) Uani 1 1 d . . . . .
 C10 C 0.70495(9) 0.2608(2) 0.54559(8) 0.0339(5) Uani 1 1 d . . . . .
 C11 C 0.72322(11) 0.1949(3) 0.58307(9) 0.0430(7) Uani 1 1 d . . . . .
 H11 H 0.733196 0.231131 0.609709 0.052 Uiso 1 1 calc R . . . .
 C12 C 0.72658(13) 0.0821(3) 0.58139(11) 0.0573(9) Uani 1 1 d . . . . .
 H12 H 0.739114 0.040786 0.606831 0.069 Uiso 1 1 calc R . . . .
 C13 C 0.71189(15) 0.0250(3) 0.54270(12) 0.0629(9) Uani 1 1 d . . . . .
 H13 H 0.714417 -0.054246 0.542139 0.075 Uiso 1 1 calc R . . . .
 C14 C 0.69401(14) 0.0833(3) 0.50600(11) 0.0582(9) Uani 1 1 d . . . . .
 H14 H 0.684047 0.044160 0.479948 0.070 Uiso 1 1 calc R . . . .
 C15 C 0.69006(11) 0.2018(3) 0.50615(9) 0.0413(6) Uani 1 1 d . . . . .
 C16 C 0.67163(11) 0.2629(3) 0.46884(9) 0.0435(7) Uani 1 1 d . . . . .
 H16 H 0.661352 0.223975 0.442743 0.052 Uiso 1 1 calc R . . . .
 C17 C 0.66787(10) 0.3785(2) 0.46871(8) 0.0365(6) Uani 1 1 d . . . . .
 C18 C 0.64797(11) 0.4393(3) 0.42996(8) 0.0440(7) Uani 1 1 d . . . . .
 H18 H 0.637810 0.399857 0.403982 0.053 Uiso 1 1 calc R . . . .
 C19 C 0.64353(11) 0.5517(3) 0.42996(9) 0.0470(7) Uani 1 1 d . . . . .
 H19 H 0.629893 0.590617 0.404089 0.056 Uiso 1 1 calc R . . . .
 C20 C 0.65909(11) 0.6119(3) 0.46834(9) 0.0447(7) Uani 1 1 d . . . . .
 H20 H 0.656336 0.691148 0.467885 0.054 Uiso 1 1 calc R . . . .
 C21 C 0.67800(10) 0.5579(2) 0.50603(9) 0.0374(6) Uani 1 1 d . . . . .
 H21 H 0.688188 0.600214 0.531366 0.045 Uiso 1 1 calc R . . . .
 C22 C 0.68272(9) 0.4386(2) 0.50794(8) 0.0312(5) Uani 1 1 d . . . . .
 C23 C 0.62748(12) 0.4592(3) 0.80645(9) 0.0542(9) Uani 1 1 d . . . . .
 H23A H 0.609694 0.387905 0.800144 0.081 Uiso 1 1 calc GR . . . .
 H23B H 0.603883 0.521224 0.799150 0.081 Uiso 1 1 calc GR . . . .
 H23C H 0.646380 0.462535 0.836548 0.081 Uiso 1 1 calc GR . . . .
 C24 C 0.49059(11) 0.4122(4) 0.66996(10) 0.0585(9) Uani 1 1 d . . . . .
 H24A H 0.458371 0.400810 0.648505 0.088 Uiso 1 1 calc GR . . . .
 H24B H 0.487100 0.463063 0.691736 0.088 Uiso 1 1 calc GR . . . .
 H24C H 0.503528 0.340131 0.682778 0.088 Uiso 1 1 calc GR . . . .
 C25 C 0.70360(9) 0.79727(19) 0.63149(7) 0.0297(5) Uani 1 1 d . . . . .
 C26 C 0.72172(10) 0.8741(2) 0.66400(8) 0.0357(6) Uani 1 1 d . . . . .
 H26 H 0.755640 0.893520 0.673172 0.043 Uiso 1 1 calc R . . . .
 C27 C 0.69051(11) 0.9226(2) 0.68306(8) 0.0390(6) Uani 1 1 d . . . . .
 H27 H 0.703333 0.974329 0.705436 0.047 Uiso 1 1 calc R . . . .
 C28 C 0.64090(11) 0.8964(2) 0.66988(8) 0.0390(6) Uani 1 1 d . . . . .
 H28 H 0.619691 0.929472 0.683181 0.047 Uiso 1 1 calc R . . . .
 C29 C 0.62245(9) 0.8209(2) 0.63682(8) 0.0335(5) Uani 1 1 d . . . . .
 H29 H 0.588313 0.803553 0.627327 0.040 Uiso 1 1 calc R . . . .
 C30 C 0.65312(9) 0.77058(19) 0.61757(7) 0.0274(5) Uani 1 1 d . . . . .
 C31 C 0.59721(8) 0.70783(19) 0.55526(7) 0.0271(5) Uani 1 1 d . . . . .
 H31 H 0.582993 0.780413 0.552555 0.033 Uiso 1 1 calc R . . . .
 C32 C 0.57439(8) 0.62222(19) 0.52340(7) 0.0254(5) Uani 1 1 d . . . . .
 C33 C 0.54520(8) 0.6566(2) 0.48281(7) 0.0293(5) Uani 1 1 d . . . . .
 H33 H 0.537781 0.733488 0.476771 0.035 Uiso 1 1 calc R . . . .
 C34 C 0.52769(9) 0.5767(2) 0.45215(7) 0.0307(5) Uani 1 1 d . . . . .
 H34 H 0.509043 0.597766 0.424224 0.037 Uiso 1 1 calc R . . . .
 C35 C 0.53776(8) 0.4630(2) 0.46268(7) 0.0274(5) Uani 1 1 d . . . . .
 C36 C 0.56506(8) 0.43614(19) 0.50507(7) 0.0233(4) Uani 1 1 d . . . . .
 C37 C 0.57229(8) 0.31891(19) 0.51728(7) 0.0238(4) Uani 1 1 d . . . . .
 C38 C 0.52088(9) 0.3755(2) 0.43216(7) 0.0341(5) Uani 1 1 d . . . . .
 H38 H 0.503372 0.394408 0.403728 0.041 Uiso 1 1 calc R . . . .
 C39 C 0.52935(10) 0.2669(2) 0.44301(7) 0.0355(6) Uani 1 1 d . . . . .
 H39 H 0.519019 0.210645 0.421974 0.043 Uiso 1 1 calc R . . . .
 C40 C 0.55400(9) 0.2353(2) 0.48632(7) 0.0297(5) Uani 1 1 d . . . . .
 C41 C 0.55918(10) 0.1231(2) 0.49936(8) 0.0372(6) Uani 1 1 d . . . . .
 H41 H 0.547921 0.064525 0.479404 0.045 Uiso 1 1 calc R . . . .
 C42 C 0.58071(10) 0.0991(2) 0.54131(8) 0.0355(6) Uani 1 1 d . . . . .
 H42 H 0.583679 0.023813 0.550917 0.043 Uiso 1 1 calc R . . . .
 C43 C 0.59824(8) 0.1872(2) 0.56978(7) 0.0275(5) Uani 1 1 d . . . . .
 C44 C 0.62079(9) 0.16254(19) 0.61528(7) 0.0281(5) Uani 1 1 d . . . . .
 H44 H 0.612860 0.094280 0.626116 0.034 Uiso 1 1 calc R . . . .
 C45 C 0.66568(9) 0.20405(19) 0.68401(7) 0.0269(5) Uani 1 1 d . . . . .
 C46 C 0.63134(10) 0.1741(2) 0.70329(8) 0.0341(5) Uani 1 1 d . . . . .
 H46 H 0.597377 0.171002 0.687156 0.041 Uiso 1 1 calc R . . . .
 C47 C 0.64638(12) 0.1485(2) 0.74612(8) 0.0429(6) Uani 1 1 d . . . . .
 H47 H 0.622816 0.126606 0.758990 0.052 Uiso 1 1 calc R . . . .
 C48 C 0.69540(12) 0.1550(2) 0.76969(8) 0.0417(6) Uani 1 1 d . . . . .
 H48 H 0.705656 0.135890 0.798737 0.050 Uiso 1 1 calc R . . . .
 C49 C 0.73004(10) 0.1891(2) 0.75148(8) 0.0355(6) Uani 1 1 d . . . . .
 H49 H 0.763674 0.195579 0.768234 0.043 Uiso 1 1 calc R . . . .
 C50 C 0.71544(9) 0.21395(19) 0.70844(7) 0.0278(5) Uani 1 1 d . . . . .
 C51 C 0.79843(10) 0.2540(3) 0.71280(9) 0.0463(7) Uani 1 1 d . . . . .
 H51A H 0.809272 0.184824 0.729456 0.056 Uiso 1 1 calc R . . . .
 H51B H 0.802844 0.317613 0.732615 0.056 Uiso 1 1 calc R . . . .
 C52 C 0.82849(11) 0.2722(3) 0.68489(11) 0.0542(8) Uani 1 1 d . . . . .
 H52A H 0.863856 0.269762 0.701801 0.065 Uiso 1 1 calc R . . . .
 H52B H 0.821954 0.211501 0.663706 0.065 Uiso 1 1 calc R . . . .
 C53 C 0.85565(10) 0.4189(3) 0.65139(11) 0.0501(7) Uani 1 1 d . . . . .
 H53A H 0.870949 0.356863 0.640514 0.060 Uiso 1 1 calc R . . . .
 H53B H 0.881169 0.451601 0.676053 0.060 Uiso 1 1 calc R . . . .
 C54 C 0.83857(13) 0.5046(3) 0.61872(14) 0.0661(10) Uani 1 1 d . . . . .
 H54A H 0.867144 0.535321 0.611980 0.079 Uiso 1 1 calc R . . . .
 H54B H 0.816072 0.469840 0.592821 0.079 Uiso 1 1 calc R . . . .
 C55 C 0.80677(10) 0.6854(3) 0.60349(11) 0.0474(7) Uani 1 1 d . . . . .
 H55A H 0.785967 0.664097 0.574700 0.057 Uiso 1 1 calc R . . . .
 H55B H 0.838698 0.713439 0.602221 0.057 Uiso 1 1 calc R . . . .
 C56 C 0.78185(9) 0.7731(2) 0.62084(10) 0.0414(6) Uani 1 1 d . . . . .
 H56A H 0.797645 0.778989 0.651729 0.050 Uiso 1 1 calc R . . . .
 H56B H 0.784364 0.846697 0.608104 0.050 Uiso 1 1 calc R . . . .

loop_
  _atom_site_aniso_label
  _atom_site_aniso_U_11
  _atom_site_aniso_U_22
  _atom_site_aniso_U_33
  _atom_site_aniso_U_23
  _atom_site_aniso_U_13
  _atom_site_aniso_U_12
 P1 0.0393(4) 0.0508(5) 0.0544(5) -0.0146(4) 0.0173(3) -0.0105(3)
 F1 0.168(3) 0.127(3) 0.095(2) -0.007(2) -0.054(2) 0.011(3)
 F2 0.0772(16) 0.0740(16) 0.178(3) -0.0332(18) 0.0739(19) -0.0119(13)
 F3 0.0896(17) 0.0569(14) 0.129(2) -0.0065(14) 0.0529(16) -0.0169(12)
 F4 0.122(3) 0.177(4) 0.0762(19) 0.016(2) 0.0025(18) -0.049(2)
 F5 0.111(2) 0.136(3) 0.297(5) -0.136(3) 0.134(3) -0.057(2)
 F6 0.0808(17) 0.0720(17) 0.256(4) -0.040(2) 0.098(2) -0.0318(14)
 O1 0.0403(10) 0.0719(14) 0.0179(8) -0.0001(8) 0.0063(7) 0.0126(10)
 O2 0.0240(9) 0.0800(15) 0.0305(9) 0.0063(9) 0.0041(7) -0.0006(9)
 O3 0.0296(9) 0.0425(10) 0.0283(9) 0.0052(7) 0.0040(7) -0.0027(7)
 O4 0.0315(10) 0.0682(15) 0.0656(14) 0.0326(12) 0.0158(10) 0.0077(10)
 O5 0.0462(11) 0.0429(12) 0.0737(15) 0.0082(10) 0.0285(11) 0.0015(9)
 O6 0.0271(9) 0.0397(10) 0.0460(11) -0.0060(8) 0.0100(8) -0.0078(7)
 N1 0.0226(9) 0.0272(10) 0.0202(9) -0.0009(7) 0.0056(7) -0.0028(7)
 N2 0.0266(9) 0.0249(10) 0.0276(10) -0.0018(8) 0.0065(8) -0.0032(7)
 N3 0.0229(9) 0.0244(9) 0.0213(9) -0.0008(7) 0.0060(7) -0.0023(7)
 N4 0.0244(9) 0.0246(9) 0.0219(9) -0.0008(7) 0.0052(7) -0.0029(7)
 N5 0.0285(9) 0.0249(9) 0.0223(9) 0.0002(7) 0.0076(7) 0.0002(7)
 C1 0.0358(12) 0.0338(13) 0.0184(11) -0.0007(9) 0.0048(9) 0.0076(10)
 C2 0.0333(12) 0.0380(13) 0.0270(12) 0.0030(10) 0.0118(10) 0.0080(10)
 C3 0.0242(11) 0.0355(13) 0.0275(12) 0.0018(10) 0.0041(9) 0.0035(9)
 C4 0.0298(11) 0.0320(12) 0.0179(10) 0.0004(9) 0.0023(9) 0.0025(9)
 C5 0.0283(11) 0.0197(10) 0.0227(10) -0.0016(8) 0.0050(9) 0.0005(8)
 C6 0.0277(11) 0.0291(12) 0.0229(11) -0.0035(9) 0.0012(9) 0.0023(9)
 C7 0.0255(10) 0.0261(11) 0.0220(10) -0.0019(8) 0.0025(8) -0.0041(8)
 C8 0.0246(11) 0.0436(14) 0.0268(11) 0.0003(10) 0.0098(9) -0.0046(10)
 C9 0.0260(11) 0.0447(14) 0.0265(11) 0.0021(10) 0.0138(9) 0.0003(10)
 C10 0.0333(12) 0.0429(14) 0.0318(12) 0.0044(11) 0.0192(10) 0.0072(10)
 C11 0.0454(15) 0.0520(17) 0.0383(14) 0.0103(12) 0.0227(12) 0.0136(13)
 C12 0.069(2) 0.057(2) 0.056(2) 0.0203(16) 0.0351(17) 0.0249(17)
 C13 0.084(3) 0.0412(18) 0.073(2) 0.0101(16) 0.040(2) 0.0206(17)
 C14 0.078(2) 0.0481(19) 0.057(2) -0.0061(15) 0.0338(18) 0.0118(16)
 C15 0.0485(15) 0.0449(16) 0.0375(14) 0.0001(12) 0.0237(12) 0.0068(12)
 C16 0.0555(17) 0.0503(17) 0.0299(13) -0.0046(12) 0.0211(12) 0.0027(13)
 C17 0.0365(13) 0.0498(16) 0.0276(12) 0.0031(11) 0.0165(10) 0.0019(11)
 C18 0.0471(15) 0.0618(19) 0.0262(13) 0.0049(12) 0.0162(11) -0.0016(13)
 C19 0.0421(15) 0.065(2) 0.0366(15) 0.0197(14) 0.0157(12) 0.0008(14)
 C20 0.0447(15) 0.0459(16) 0.0494(16) 0.0142(13) 0.0234(13) 0.0006(12)
 C21 0.0367(13) 0.0424(15) 0.0378(14) 0.0028(11) 0.0187(11) -0.0026(11)
 C22 0.0269(11) 0.0415(14) 0.0293(12) 0.0029(10) 0.0149(9) -0.0010(10)
 C23 0.0535(17) 0.088(2) 0.0249(13) 0.0088(14) 0.0181(12) 0.0234(17)
 C24 0.0312(14) 0.096(3) 0.0492(18) 0.0006(18) 0.0142(13) -0.0122(16)
 C25 0.0323(12) 0.0232(11) 0.0298(12) 0.0035(9) 0.0048(9) -0.0030(9)
 C26 0.0372(13) 0.0252(12) 0.0342(13) 0.0036(10) -0.0030(10) -0.0070(10)
 C27 0.0555(16) 0.0223(12) 0.0294(13) -0.0027(10) 0.0005(11) -0.0019(11)
 C28 0.0522(16) 0.0297(13) 0.0351(14) -0.0037(11) 0.0140(12) 0.0012(11)
 C29 0.0354(12) 0.0289(12) 0.0351(13) -0.0024(10) 0.0099(10) -0.0026(10)
 C30 0.0314(11) 0.0206(11) 0.0260(11) 0.0012(9) 0.0036(9) -0.0016(9)
 C31 0.0286(11) 0.0236(11) 0.0279(11) 0.0009(9) 0.0074(9) -0.0016(9)
 C32 0.0233(10) 0.0267(11) 0.0253(11) 0.0007(9) 0.0065(8) -0.0016(8)
 C33 0.0286(11) 0.0288(12) 0.0276(12) 0.0035(9) 0.0050(9) 0.0004(9)
 C34 0.0277(11) 0.0367(13) 0.0236(11) 0.0046(10) 0.0028(9) 0.0013(10)
 C35 0.0250(10) 0.0333(12) 0.0219(11) -0.0016(9) 0.0048(9) -0.0017(9)
 C36 0.0204(10) 0.0285(11) 0.0205(10) -0.0012(8) 0.0058(8) -0.0018(8)
 C37 0.0213(10) 0.0288(12) 0.0202(10) -0.0025(8) 0.0051(8) -0.0018(8)
 C38 0.0356(12) 0.0429(14) 0.0185(11) -0.0030(10) 0.0015(9) -0.0002(11)
 C39 0.0421(14) 0.0376(14) 0.0210(11) -0.0097(10) 0.0023(10) -0.0012(11)
 C40 0.0317(11) 0.0315(12) 0.0232(11) -0.0054(9) 0.0053(9) -0.0005(9)
 C41 0.0476(15) 0.0292(13) 0.0298(12) -0.0102(10) 0.0057(11) -0.0051(11)
 C42 0.0467(14) 0.0234(12) 0.0332(13) -0.0028(10) 0.0083(11) -0.0032(10)
 C43 0.0296(11) 0.0265(12) 0.0250(11) -0.0011(9) 0.0070(9) -0.0026(9)
 C44 0.0343(12) 0.0226(11) 0.0269(11) 0.0013(9) 0.0094(9) -0.0017(9)
 C45 0.0363(12) 0.0198(10) 0.0232(11) 0.0006(8) 0.0076(9) 0.0013(9)
 C46 0.0397(13) 0.0327(13) 0.0314(12) -0.0012(10) 0.0136(10) -0.0009(10)
 C47 0.0595(17) 0.0438(16) 0.0324(13) 0.0004(12) 0.0246(13) -0.0029(13)
 C48 0.0626(18) 0.0394(15) 0.0223(12) 0.0011(10) 0.0127(12) 0.0022(13)
 C49 0.0454(14) 0.0326(13) 0.0227(11) -0.0019(10) 0.0031(10) 0.0012(11)
 C50 0.0364(12) 0.0211(11) 0.0248(11) -0.0006(9) 0.0085(9) 0.0001(9)
 C51 0.0325(13) 0.0526(18) 0.0451(16) 0.0192(13) 0.0004(12) -0.0004(12)
 C52 0.0348(14) 0.060(2) 0.065(2) 0.0227(16) 0.0124(14) 0.0076(13)
 C53 0.0317(13) 0.0521(18) 0.068(2) 0.0053(15) 0.0192(14) 0.0026(12)
 C54 0.0534(19) 0.068(2) 0.095(3) 0.022(2) 0.049(2) 0.0089(17)
 C55 0.0352(14) 0.0471(17) 0.0651(19) 0.0105(14) 0.0233(13) -0.0057(12)
 C56 0.0292(12) 0.0363(14) 0.0562(17) 0.0091(12) 0.0104(12) -0.0085(11)

_geom_special_details
;
 All esds (except the esd in the dihedral angle between two l.s. planes)
 are estimated using the full covariance matrix.  The cell esds are taken
 into account individually in the estimation of esds in distances, angles
 and torsion angles; correlations between esds in cell parameters are only
 used when they are defined by crystal symmetry.  An approximate (isotropic)
 treatment of cell esds is used for estimating esds involving l.s. planes.
;
loop_
  _geom_bond_atom_site_label_1
  _geom_bond_atom_site_label_2
  _geom_bond_distance
  _geom_bond_site_symmetry_2
  _geom_bond_publ_flag
 P1 F1 1.521(3) . ?
 P1 F2 1.584(3) . ?
 P1 F3 1.570(2) . ?
 P1 F4 1.601(3) . ?
 P1 F5 1.548(3) . ?
 P1 F6 1.582(3) . ?
 O1 C1 1.380(3) . ?
 O1 C23 1.429(3) . ?
 O2 C3 1.373(3) . ?
 O2 C24 1.419(4) . ?
 O3 C50 1.369(3) . ?
 O3 C51 1.440(3) . ?
 O4 C52 1.411(4) . ?
 O4 C53 1.397(4) . ?
 O5 C54 1.384(4) . ?
 O5 C55 1.435(4) . ?
 O6 C25 1.374(3) . ?
 O6 C56 1.435(3) . ?
 N1 C7 1.492(3) . ?
 N1 C8 1.500(3) . ?
 N2 C30 1.418(3) . ?
 N2 C31 1.270(3) . ?
 N3 C32 1.333(3) . ?
 N3 C36 1.355(3) . ?
 N4 C37 1.354(3) . ?
 N4 C43 1.331(3) . ?
 N5 C44 1.270(3) . ?
 N5 C45 1.426(3) . ?
 C1 C2 1.392(4) . ?
 C1 C6 1.386(3) . ?
 C2 C3 1.401(3) . ?
 C3 C4 1.385(3) . ?
 C4 C5 1.391(3) . ?
 C5 C6 1.393(3) . ?
 C5 C7 1.509(3) . ?
 C8 C9 1.513(3) . ?
 C9 C10 1.410(4) . ?
 C9 C22 1.414(3) . ?
 C10 C11 1.431(4) . ?
 C10 C15 1.436(4) . ?
 C11 C12 1.353(5) . ?
 C12 C13 1.405(5) . ?
 C13 C14 1.362(5) . ?
 C14 C15 1.421(4) . ?
 C15 C16 1.396(4) . ?
 C16 C17 1.384(4) . ?
 C17 C18 1.436(4) . ?
 C17 C22 1.437(4) . ?
 C18 C19 1.348(5) . ?
 C19 C20 1.415(5) . ?
 C20 C21 1.365(4) . ?
 C21 C22 1.431(4) . ?
 C25 C26 1.391(3) . ?
 C25 C30 1.408(3) . ?
 C26 C27 1.385(4) . ?
 C27 C28 1.383(4) . ?
 C28 C29 1.394(4) . ?
 C29 C30 1.387(4) . ?
 C31 C32 1.471(3) . ?
 C32 C33 1.409(3) . ?
 C33 C34 1.373(3) . ?
 C34 C35 1.409(4) . ?
 C35 C36 1.420(3) . ?
 C35 C38 1.433(3) . ?
 C36 C37 1.455(3) . ?
 C37 C40 1.413(3) . ?
 C38 C39 1.347(4) . ?
 C39 C40 1.445(3) . ?
 C40 C41 1.403(4) . ?
 C41 C42 1.372(4) . ?
 C42 C43 1.400(3) . ?
 C43 C44 1.482(3) . ?
 C45 C46 1.391(3) . ?
 C45 C50 1.403(3) . ?
 C46 C47 1.394(4) . ?
 C47 C48 1.375(4) . ?
 C48 C49 1.387(4) . ?
 C49 C50 1.399(3) . ?
 C51 C52 1.482(4) . ?
 C53 C54 1.463(5) . ?
 C55 C56 1.490(4) . ?

loop_
  _geom_angle_atom_site_label_1
  _geom_angle_atom_site_label_2
  _geom_angle_atom_site_label_3
  _geom_angle
  _geom_angle_site_symmetry_1
  _geom_angle_site_symmetry_3
  _geom_angle_publ_flag
 F1 P1 F2 93.1(2) . . ?
 F1 P1 F3 94.9(2) . . ?
 F1 P1 F4 177.1(2) . . ?
 F1 P1 F5 91.8(3) . . ?
 F1 P1 F6 86.9(2) . . ?
 F2 P1 F4 84.3(2) . . ?
 F3 P1 F2 91.67(14) . . ?
 F3 P1 F4 86.49(17) . . ?
 F3 P1 F6 177.56(18) . . ?
 F5 P1 F2 174.0(3) . . ?
 F5 P1 F3 91.34(17) . . ?
 F5 P1 F4 90.6(3) . . ?
 F5 P1 F6 90.23(18) . . ?
 F6 P1 F2 86.59(15) . . ?
 F6 P1 F4 91.6(2) . . ?
 C1 O1 C23 117.2(2) . . ?
 C3 O2 C24 118.4(2) . . ?
 C50 O3 C51 116.5(2) . . ?
 C53 O4 C52 113.5(2) . . ?
 C54 O5 C55 111.9(3) . . ?
 C25 O6 C56 117.7(2) . . ?
 C7 N1 C8 111.15(17) . . ?
 C31 N2 C30 118.3(2) . . ?
 C32 N3 C36 117.51(19) . . ?
 C43 N4 C37 117.73(19) . . ?
 C44 N5 C45 117.1(2) . . ?
 O1 C1 C2 123.1(2) . . ?
 O1 C1 C6 115.5(2) . . ?
 C6 C1 C2 121.3(2) . . ?
 C1 C2 C3 117.5(2) . . ?
 O2 C3 C2 122.3(2) . . ?
 O2 C3 C4 115.7(2) . . ?
 C4 C3 C2 122.0(2) . . ?
 C3 C4 C5 119.2(2) . . ?
 C4 C5 C6 119.9(2) . . ?
 C4 C5 C7 121.9(2) . . ?
 C6 C5 C7 118.1(2) . . ?
 C1 C6 C5 119.9(2) . . ?
 N1 C7 C5 112.75(18) . . ?
 N1 C8 C9 113.51(18) . . ?
 C10 C9 C8 119.4(2) . . ?
 C10 C9 C22 120.1(2) . . ?
 C22 C9 C8 120.4(2) . . ?
 C9 C10 C11 123.0(2) . . ?
 C9 C10 C15 119.9(2) . . ?
 C11 C10 C15 117.1(3) . . ?
 C12 C11 C10 121.4(3) . . ?
 C11 C12 C13 121.2(3) . . ?
 C14 C13 C12 120.0(3) . . ?
 C13 C14 C15 120.9(3) . . ?
 C14 C15 C10 119.4(3) . . ?
 C16 C15 C10 118.9(3) . . ?
 C16 C15 C14 121.7(3) . . ?
 C17 C16 C15 122.0(3) . . ?
 C16 C17 C18 121.0(3) . . ?
 C16 C17 C22 119.7(2) . . ?
 C18 C17 C22 119.3(3) . . ?
 C19 C18 C17 120.9(3) . . ?
 C18 C19 C20 120.2(3) . . ?
 C21 C20 C19 121.1(3) . . ?
 C20 C21 C22 121.0(3) . . ?
 C9 C22 C17 119.3(2) . . ?
 C9 C22 C21 123.3(2) . . ?
 C21 C22 C17 117.4(2) . . ?
 O6 C25 C26 125.5(2) . . ?
 O6 C25 C30 115.0(2) . . ?
 C26 C25 C30 119.5(2) . . ?
 C27 C26 C25 120.3(2) . . ?
 C28 C27 C26 120.8(2) . . ?
 C27 C28 C29 119.1(3) . . ?
 C30 C29 C28 121.1(2) . . ?
 C25 C30 N2 119.1(2) . . ?
 C29 C30 N2 121.5(2) . . ?
 C29 C30 C25 119.2(2) . . ?
 N2 C31 C32 121.5(2) . . ?
 N3 C32 C31 117.0(2) . . ?
 N3 C32 C33 123.9(2) . . ?
 C33 C32 C31 119.0(2) . . ?
 C34 C33 C32 118.7(2) . . ?
 C33 C34 C35 119.1(2) . . ?
 C34 C35 C36 118.1(2) . . ?
 C34 C35 C38 121.9(2) . . ?
 C36 C35 C38 120.0(2) . . ?
 N3 C36 C35 122.5(2) . . ?
 N3 C36 C37 118.67(19) . . ?
 C35 C36 C37 118.8(2) . . ?
 N4 C37 C36 118.16(19) . . ?
 N4 C37 C40 122.6(2) . . ?
 C40 C37 C36 119.2(2) . . ?
 C39 C38 C35 121.3(2) . . ?
 C38 C39 C40 120.7(2) . . ?
 C37 C40 C39 119.9(2) . . ?
 C41 C40 C37 118.0(2) . . ?
 C41 C40 C39 122.1(2) . . ?
 C42 C41 C40 119.1(2) . . ?
 C41 C42 C43 119.1(2) . . ?
 N4 C43 C42 123.5(2) . . ?
 N4 C43 C44 116.9(2) . . ?
 C42 C43 C44 119.6(2) . . ?
 N5 C44 C43 121.8(2) . . ?
 C46 C45 N5 120.6(2) . . ?
 C46 C45 C50 119.4(2) . . ?
 C50 C45 N5 119.9(2) . . ?
 C45 C46 C47 120.5(2) . . ?
 C48 C47 C46 119.8(3) . . ?
 C47 C48 C49 120.7(2) . . ?
 C48 C49 C50 120.0(2) . . ?
 O3 C50 C45 116.6(2) . . ?
 O3 C50 C49 123.9(2) . . ?
 C49 C50 C45 119.5(2) . . ?
 O3 C51 C52 109.5(2) . . ?
 O4 C52 C51 110.9(3) . . ?
 O4 C53 C54 112.3(2) . . ?
 O5 C54 C53 111.8(3) . . ?
 O5 C55 C56 106.9(2) . . ?
 O6 C56 C55 107.9(2) . . ?

_smtbx_masks_special_details       ?
loop_
  _smtbx_masks_void_nr
  _smtbx_masks_void_average_x
  _smtbx_masks_void_average_y
  _smtbx_masks_void_average_z
  _smtbx_masks_void_volume
  _smtbx_masks_void_count_electrons
  _smtbx_masks_void_content
 1 0.000 -0.360 0.250 323.3 71.7 acetonitrile
 2 0.000 0.360 0.750 323.3 71.7 acetonitrile
 3 0.132 0.365 0.503 10.5 0.0 ?
 4 0.132 0.635 0.003 10.5 0.0 ?
 5 0.250 0.250 0.500 21.9 0.0 ?
 6 0.250 0.750 1.000 21.9 0.0 ?
 7 0.368 0.135 0.497 10.5 0.0 ?
 8 0.368 0.865 0.997 10.5 0.0 ?
 9 0.500 0.140 0.250 323.3 71.3 acetonitrile
 10 0.500 0.860 0.750 323.3 71.4 acetonitrile
 11 0.632 0.135 0.003 10.5 0.0 ?
 12 0.632 0.865 0.503 10.5 0.0 ?
 13 0.750 0.250 1.000 21.9 0.0 ?
 14 0.750 0.750 0.500 21.9 0.0 ?
 15 0.868 0.365 0.997 10.5 0.0 ?
 16 0.868 0.635 0.497 10.5 0.0 ?

_shelx_res_file
;
TITL sam021_a.res in C2/c
    sam021.res
    created by SHELXL-2018/3 at 13:48:06 on 16-Jul-2020
REM Old TITL SAM021 in C2/c
REM SHELXT solution in C2/c
REM R1 0.248, Rweak 0.011, Alpha 0.033, Orientation as input
REM Formula found by SHELXT: C116 N17 O8 F10 P2
CELL 0.71073 28.7159 11.9443 33.5604 90 108.951 90
ZERR 8 0.0159 0.0068 0.0189 0 0.01 0
LATT 7
SYMM -X,+Y,0.5-Z
SFAC C H F N O P
UNIT 448 424 48 40 48 8

L.S. 10
PLAN  5
SIZE 0.4 0.3 0.2
TEMP -100.15
list 4
ABIN
fmap 2 53
acta
REM <olex2.extras>
REM <HklSrc "%.\\SAM021.hkl">
REM </olex2.extras>

WGHT    0.106300   27.286100
FVAR       0.09811
P1    6    0.480908    0.074387    0.616180    11.00000    0.03927    0.05082 =
         0.05435   -0.01458    0.01734   -0.01051
F1    3    0.443863    0.088415    0.572260    11.00000    0.16768    0.12654 =
         0.09539   -0.00701   -0.05398    0.01100
F2    3    0.516266   -0.001529    0.599926    11.00000    0.07723    0.07401 =
         0.17814   -0.03324    0.07387   -0.01193
F3    3    0.511057    0.182493    0.613932    11.00000    0.08959    0.05692 =
         0.12857   -0.00646    0.05291   -0.01690
F4    3    0.520676    0.053721    0.661656    11.00000    0.12174    0.17670 =
         0.07616    0.01631    0.00251   -0.04924
F5    3    0.447979    0.140891    0.636307    11.00000    0.11060    0.13559 =
         0.29738   -0.13556    0.13369   -0.05724
F6    3    0.452669   -0.037272    0.619357    11.00000    0.08083    0.07200 =
         0.25579   -0.03956    0.09781   -0.03183
O1    5    0.660276    0.467798    0.782394    11.00000    0.04032    0.07188 =
         0.01792   -0.00013    0.00630    0.01261
O2    5    0.523551    0.459440    0.650964    11.00000    0.02399    0.07998 =
         0.03055    0.00632    0.00412   -0.00059
O3    5    0.747342    0.244478    0.687662    11.00000    0.02964    0.04255 =
         0.02826    0.00516    0.00402   -0.00272
O4    5    0.817460    0.376463    0.664185    11.00000    0.03151    0.06824 =
         0.06564    0.03256    0.01579    0.00772
O5    5    0.814311    0.590831    0.631271    11.00000    0.04618    0.04286 =
         0.07366    0.00822    0.02850    0.00153
O6    5    0.731117    0.741748    0.611049    11.00000    0.02714    0.03971 =
         0.04597   -0.00604    0.00996   -0.00780
N1    4    0.674661    0.441699    0.607535    11.00000    0.02263    0.02721 =
         0.02016   -0.00089    0.00564   -0.00284
AFIX  23
H1A   2    0.648535    0.480906    0.590606    11.00000   -1.20000
H1B   2    0.664418    0.370603    0.609814    11.00000   -1.20000
AFIX   0

N2    4    0.635505    0.686941    0.586315    11.00000    0.02664    0.02486 =
         0.02755   -0.00179    0.00648   -0.00324
N3    4    0.584084    0.515517    0.534749    11.00000    0.02287    0.02443 =
         0.02128   -0.00079    0.00597   -0.00230
N4    4    0.594692    0.294501    0.558489    11.00000    0.02435    0.02465 =
         0.02187   -0.00078    0.00521   -0.00291
N5    4    0.650420    0.230140    0.640194    11.00000    0.02852    0.02495 =
         0.02227    0.00018    0.00761    0.00019
C1    1    0.639475    0.469986    0.739097    11.00000    0.03582    0.03380 =
         0.01841   -0.00071    0.00480    0.00760
C2    1    0.589020    0.461472    0.718479    11.00000    0.03331    0.03799 =
         0.02704    0.00302    0.01184    0.00804
AFIX  43
H2    2    0.566593    0.452754    0.733747    11.00000   -1.20000
AFIX   0
C3    1    0.572526    0.466231    0.674384    11.00000    0.02421    0.03547 =
         0.02752    0.00184    0.00407    0.00346
C4    1    0.604633    0.480164    0.651639    11.00000    0.02980    0.03201 =
         0.01794    0.00035    0.00232    0.00250
AFIX  43
H4    2    0.592443    0.485530    0.621788    11.00000   -1.20000
AFIX   0
C5    1    0.654944    0.486205    0.673031    11.00000    0.02828    0.01968 =
         0.02273   -0.00162    0.00500    0.00052
C6    1    0.672354    0.480729    0.716868    11.00000    0.02766    0.02909 =
         0.02289   -0.00345    0.00119    0.00234
AFIX  43
H6    2    0.706724    0.484354    0.731514    11.00000   -1.20000
AFIX   0
C7    1    0.692120    0.494631    0.650100    11.00000    0.02554    0.02615 =
         0.02205   -0.00190    0.00254   -0.00412
AFIX  23
H7A   2    0.699438    0.574562    0.647050    11.00000   -1.20000
H7B   2    0.723081    0.457946    0.667184    11.00000   -1.20000
AFIX   0
C8    1    0.714780    0.439052    0.587975    11.00000    0.02459    0.04358 =
         0.02675    0.00030    0.00978   -0.00465
AFIX  23
H8A   2    0.744091    0.402094    0.607718    11.00000   -1.20000
H8B   2    0.724073    0.516898    0.583773    11.00000   -1.20000
AFIX   0
C9    1    0.700404    0.378289    0.546164    11.00000    0.02598    0.04468 =
         0.02654    0.00208    0.01384    0.00027
C10   1    0.704952    0.260775    0.545591    11.00000    0.03329    0.04287 =
         0.03184    0.00443    0.01921    0.00722
C11   1    0.723216    0.194891    0.583067    11.00000    0.04537    0.05195 =
         0.03834    0.01027    0.02266    0.01356
AFIX  43
H11   2    0.733196    0.231131    0.609709    11.00000   -1.20000
AFIX   0
C12   1    0.726584    0.082097    0.581387    11.00000    0.06915    0.05731 =
         0.05629    0.02032    0.03513    0.02487
AFIX  43
H12   2    0.739114    0.040786    0.606831    11.00000   -1.20000
AFIX   0
C13   1    0.711888    0.025002    0.542703    11.00000    0.08411    0.04125 =
         0.07335    0.01006    0.03950    0.02065
AFIX  43
H13   2    0.714417   -0.054246    0.542139    11.00000   -1.20000
AFIX   0
C14   1    0.694010    0.083302    0.506002    11.00000    0.07828    0.04811 =
         0.05677   -0.00608    0.03378    0.01176
AFIX  43
H14   2    0.684047    0.044160    0.479948    11.00000   -1.20000
AFIX   0
C15   1    0.690056    0.201847    0.506149    11.00000    0.04853    0.04494 =
         0.03754    0.00005    0.02373    0.00678
C16   1    0.671625    0.262913    0.468839    11.00000    0.05551    0.05030 =
         0.02986   -0.00460    0.02107    0.00266
AFIX  43
H16   2    0.661352    0.223975    0.442743    11.00000   -1.20000
AFIX   0
C17   1    0.667867    0.378462    0.468714    11.00000    0.03651    0.04982 =
         0.02757    0.00308    0.01648    0.00193
C18   1    0.647973    0.439328    0.429965    11.00000    0.04707    0.06177 =
         0.02619    0.00490    0.01618   -0.00156
AFIX  43
H18   2    0.637810    0.399857    0.403982    11.00000   -1.20000
AFIX   0
C19   1    0.643527    0.551696    0.429961    11.00000    0.04209    0.06456 =
         0.03660    0.01966    0.01569    0.00077
AFIX  43
H19   2    0.629893    0.590617    0.404089    11.00000   -1.20000
AFIX   0
C20   1    0.659091    0.611864    0.468344    11.00000    0.04472    0.04591 =
         0.04937    0.01419    0.02341    0.00065
AFIX  43
H20   2    0.656336    0.691148    0.467885    11.00000   -1.20000
AFIX   0
C21   1    0.678002    0.557910    0.506026    11.00000    0.03669    0.04241 =
         0.03784    0.00282    0.01874   -0.00258
AFIX  43
H21   2    0.688188    0.600214    0.531366    11.00000   -1.20000
AFIX   0
C22   1    0.682718    0.438597    0.507940    11.00000    0.02693    0.04145 =
         0.02929    0.00288    0.01488   -0.00099
C23   1    0.627481    0.459189    0.806450    11.00000    0.05352    0.08803 =
         0.02486    0.00878    0.01813    0.02336
AFIX 137
H23A  2    0.609694    0.387905    0.800144    11.00000   -1.50000
H23B  2    0.603883    0.521224    0.799150    11.00000   -1.50000
H23C  2    0.646380    0.462535    0.836548    11.00000   -1.50000
AFIX   0
C24   1    0.490589    0.412209    0.669965    11.00000    0.03119    0.09589 =
         0.04923    0.00057    0.01419   -0.01223
AFIX 137
H24A  2    0.458371    0.400810    0.648505    11.00000   -1.50000
H24B  2    0.487100    0.463063    0.691736    11.00000   -1.50000
H24C  2    0.503528    0.340131    0.682778    11.00000   -1.50000
AFIX   0

C25   1    0.703602    0.797270    0.631490    11.00000    0.03232    0.02321 =
         0.02975    0.00352    0.00475   -0.00302
C26   1    0.721717    0.874144    0.664001    11.00000    0.03724    0.02516 =
         0.03418    0.00363   -0.00299   -0.00704
AFIX  43
H26   2    0.755640    0.893520    0.673172    11.00000   -1.20000
AFIX   0
C27   1    0.690512    0.922556    0.683056    11.00000    0.05549    0.02231 =
         0.02941   -0.00272    0.00048   -0.00188
AFIX  43
H27   2    0.703333    0.974329    0.705436    11.00000   -1.20000
AFIX   0
C28   1    0.640901    0.896414    0.669884    11.00000    0.05218    0.02966 =
         0.03515   -0.00370    0.01404    0.00122
AFIX  43
H28   2    0.619691    0.929472    0.683181    11.00000   -1.20000
AFIX   0
C29   1    0.622453    0.820866    0.636821    11.00000    0.03538    0.02895 =
         0.03509   -0.00243    0.00989   -0.00260
AFIX  43
H29   2    0.588313    0.803553    0.627327    11.00000   -1.20000
AFIX   0
C30   1    0.653120    0.770583    0.617567    11.00000    0.03143    0.02061 =
         0.02600    0.00119    0.00357   -0.00158
C31   1    0.597215    0.707832    0.555265    11.00000    0.02858    0.02359 =
         0.02789    0.00091    0.00740   -0.00159
AFIX  43
H31   2    0.582993    0.780413    0.552555    11.00000   -1.20000
AFIX   0
C32   1    0.574385    0.622223    0.523403    11.00000    0.02325    0.02667 =
         0.02529    0.00075    0.00649   -0.00161
C33   1    0.545202    0.656571    0.482813    11.00000    0.02861    0.02883 =
         0.02757    0.00348    0.00503    0.00040
AFIX  43
H33   2    0.537781    0.733488    0.476771    11.00000   -1.20000
AFIX   0
C34   1    0.527689    0.576680    0.452149    11.00000    0.02766    0.03674 =
         0.02356    0.00462    0.00280    0.00132
AFIX  43
H34   2    0.509043    0.597766    0.424224    11.00000   -1.20000
AFIX   0
C35   1    0.537760    0.462990    0.462681    11.00000    0.02505    0.03334 =
         0.02192   -0.00155    0.00482   -0.00169
C36   1    0.565059    0.436137    0.505066    11.00000    0.02037    0.02845 =
         0.02054   -0.00122    0.00579   -0.00177
C37   1    0.572286    0.318913    0.517277    11.00000    0.02133    0.02875 =
         0.02021   -0.00250    0.00506   -0.00175
C38   1    0.520876    0.375501    0.432158    11.00000    0.03558    0.04288 =
         0.01853   -0.00300    0.00149   -0.00017
AFIX  43
H38   2    0.503372    0.394408    0.403728    11.00000   -1.20000
AFIX   0
C39   1    0.529351    0.266949    0.443006    11.00000    0.04207    0.03762 =
         0.02098   -0.00965    0.00229   -0.00122
AFIX  43
H39   2    0.519019    0.210645    0.421974    11.00000   -1.20000
AFIX   0
C40   1    0.554003    0.235319    0.486319    11.00000    0.03172    0.03151 =
         0.02316   -0.00545    0.00525   -0.00046
C41   1    0.559180    0.123125    0.499364    11.00000    0.04758    0.02921 =
         0.02979   -0.01017    0.00567   -0.00509
AFIX  43
H41   2    0.547921    0.064525    0.479404    11.00000   -1.20000
AFIX   0
C42   1    0.580708    0.099125    0.541313    11.00000    0.04667    0.02343 =
         0.03317   -0.00278    0.00835   -0.00322
AFIX  43
H42   2    0.583679    0.023813    0.550917    11.00000   -1.20000
AFIX   0
C43   1    0.598244    0.187186    0.569784    11.00000    0.02958    0.02650 =
         0.02501   -0.00108    0.00697   -0.00264
C44   1    0.620788    0.162536    0.615280    11.00000    0.03434    0.02259 =
         0.02687    0.00133    0.00937   -0.00167
AFIX  43
H44   2    0.612860    0.094280    0.626116    11.00000   -1.20000
AFIX   0
C45   1    0.665684    0.204050    0.684006    11.00000    0.03625    0.01980 =
         0.02316    0.00057    0.00762    0.00129
C46   1    0.631335    0.174063    0.703292    11.00000    0.03968    0.03265 =
         0.03137   -0.00117    0.01362   -0.00095
AFIX  43
H46   2    0.597377    0.171002    0.687156    11.00000   -1.20000
AFIX   0
C47   1    0.646378    0.148477    0.746118    11.00000    0.05955    0.04384 =
         0.03245    0.00044    0.02456   -0.00286
AFIX  43
H47   2    0.622816    0.126606    0.758990    11.00000   -1.20000
AFIX   0
C48   1    0.695404    0.154967    0.769689    11.00000    0.06259    0.03935 =
         0.02232    0.00111    0.01273    0.00221
AFIX  43
H48   2    0.705656    0.135890    0.798737    11.00000   -1.20000
AFIX   0
C49   1    0.730036    0.189089    0.751478    11.00000    0.04541    0.03256 =
         0.02275   -0.00186    0.00311    0.00120
AFIX  43
H49   2    0.763674    0.195579    0.768234    11.00000   -1.20000
AFIX   0
C50   1    0.715445    0.213951    0.708442    11.00000    0.03639    0.02114 =
         0.02484   -0.00063    0.00852    0.00013
C51   1    0.798425    0.254046    0.712797    11.00000    0.03252    0.05261 =
         0.04506    0.01916    0.00044   -0.00042
AFIX  23
H51A  2    0.809272    0.184824    0.729456    11.00000   -1.20000
H51B  2    0.802844    0.317613    0.732615    11.00000   -1.20000
AFIX   0
C52   1    0.828488    0.272231    0.684888    11.00000    0.03476    0.06010 =
         0.06497    0.02267    0.01244    0.00764
AFIX  23
H52A  2    0.863856    0.269762    0.701801    11.00000   -1.20000
H52B  2    0.821954    0.211501    0.663706    11.00000   -1.20000
AFIX   0
C53   1    0.855654    0.418935    0.651394    11.00000    0.03171    0.05214 =
         0.06848    0.00529    0.01916    0.00256
AFIX  23
H53A  2    0.870949    0.356863    0.640514    11.00000   -1.20000
H53B  2    0.881169    0.451601    0.676053    11.00000   -1.20000
AFIX   0
C54   1    0.838569    0.504558    0.618721    11.00000    0.05343    0.06832 =
         0.09461    0.02164    0.04908    0.00886
AFIX  23
H54A  2    0.867144    0.535321    0.611980    11.00000   -1.20000
H54B  2    0.816072    0.469840    0.592821    11.00000   -1.20000
AFIX   0
C55   1    0.806769    0.685383    0.603490    11.00000    0.03518    0.04713 =
         0.06509    0.01054    0.02329   -0.00565
AFIX  23
H55A  2    0.785967    0.664097    0.574700    11.00000   -1.20000
H55B  2    0.838698    0.713439    0.602221    11.00000   -1.20000
AFIX   0
C56   1    0.781846    0.773126    0.620836    11.00000    0.02923    0.03630 =
         0.05621    0.00914    0.01042   -0.00853
AFIX  23
H56A  2    0.797645    0.778989    0.651729    11.00000   -1.20000
H56B  2    0.784364    0.846697    0.608104    11.00000   -1.20000
AFIX   0
HKLF 4


REM  sam021_a.res in C2/c
REM wR2 = 0.2069, GooF = S = 1.045, Restrained GooF = 1.045 for all data
REM R1 = 0.0686 for 9309 Fo > 4sig(Fo) and 0.0792 for all 11142 data
REM 669 parameters refined using 0 restraints

END

WGHT      0.1062     27.3257

REM Highest difference peak  1.382,  deepest hole -0.691,  1-sigma level  0.068
Q1    1   0.4377  0.1653  0.5977  11.00000  0.05    1.38
Q2    1   0.4811  0.0951  0.5613  11.00000  0.05    1.35
Q3    1   0.8025  0.5732  0.5989  11.00000  0.05    1.26
Q4    1   0.4784  0.0628  0.6589  11.00000  0.05    1.04
Q5    1   0.8537  0.5570  0.6429  11.00000  0.05    0.82
;
_shelx_res_checksum                56544
_shelx_hkl_file
;
  -2   0   0    4.40    0.20
   2   0   0    3.90    0.20
   4   0   0  275.47    8.90
   4   0   0  249.68    8.80
   4   0   0  255.77    8.80
  -4   0   0  260.87    8.70
   4   0   0  238.38    8.80
   4   0   0  254.37    9.10
   4   0   0  255.17    8.80
   4   0   0  254.97    8.60
   6   0   0 5032.80  154.28
  -6   0   0 4622.44  150.38
  -6   0   0 4809.02  154.38
   6   0   0 4126.69  155.68
   6   0   0 4380.76  149.09
   6   0   0 4441.36  157.38
   6   0   0 4268.87  151.48
   6   0   0 4290.37  154.38
   6   0   0 4484.15  151.38
   6   0   0 4414.36  152.58
   6   0   0 4332.07  152.58
   8   0   0  795.82   27.10
  -8   0   0  774.42   27.40
   8   0   0  764.52   27.00
   8   0   0  804.22   26.90
   8   0   0  765.52   27.00
   8   0   0  845.42   27.30
   8   0   0  764.82   27.30
   8   0   0  778.62   26.90
   8   0   0  810.82   26.40
   8   0   0  815.82   27.90
   8   0   0  746.73   27.40
  -8   0   0  830.22   26.70
  10   0   0   -0.40    0.20
 -10   0   0   -0.20    0.30
  10   0   0    0.10    0.10
  10   0   0   -0.10    0.10
  10   0   0   -0.40    0.30
  10   0   0   -0.10    0.20
 -10   0   0   -0.30    0.30
  10   0   0    0.30    0.30
  10   0   0    0.20    0.20
  10   0   0    0.10    0.30
  10   0   0   -0.10    0.20
  10   0   0    0.00    0.30
  12   0   0    1.10    0.20
 -12   0   0    0.70    0.30
  12   0   0    1.30    0.40
  12   0   0    1.10    0.40
  12   0   0    0.70    0.10
  12   0   0    0.80    0.20
  12   0   0    0.10    0.30
  12   0   0    1.00    0.20
 -12   0   0    0.40    0.40
  12   0   0    0.70    0.40
  12   0   0    1.00    0.20
  12   0   0    1.00    0.30
  12   0   0    0.60    0.20
  14   0   0   46.90    1.70
  14   0   0   48.40    2.10
  14   0   0   49.50    1.70
  14   0   0   44.50    2.10
  14   0   0   40.50    1.70
 -14   0   0   47.30    2.00
 -14   0   0   48.60    2.00
  14   0   0   46.40    2.10
  14   0   0   47.60    2.00
  14   0   0   49.10    1.80
  14   0   0   51.69    1.80
  16   0   0   80.59    2.90
  16   0   0   78.39    3.00
  16   0   0   86.89    3.40
 -16   0   0   79.69    3.30
  16   0   0   78.99    2.90
  16   0   0   81.89    3.30
  16   0   0   82.89    3.30
 -16   0   0   83.09    3.30
  16   0   0   85.39    2.90
  16   0   0   79.59    3.00
  16   0   0   79.29    3.30
 -16   0   0   82.09    3.20
  18   0   0  108.69    4.20
  18   0   0   99.99    3.70
  18   0   0  101.19    3.80
 -18   0   0  109.49    4.10
  18   0   0  107.29    4.30
  18   0   0  110.69    3.80
 -18   0   0  104.09    4.30
 -18   0   0  109.39    4.20
  18   0   0  108.39    4.20
  18   0   0  101.39    3.80
  18   0   0  110.39    3.70
  18   0   0  110.79    4.20
  18   0   0   99.09    3.90
  18   0   0  106.69    3.90
  20   0   0   24.10    1.50
  20   0   0   25.30    1.10
  20   0   0   23.70    1.10
 -20   0   0   23.70    1.50
  20   0   0   24.80    1.60
  20   0   0   23.20    1.00
 -20   0   0   25.50    1.60
  20   0   0   24.60    1.50
  20   0   0   27.00    1.20
  20   0   0   27.90    1.30
  20   0   0   27.80    1.00
  20   0   0   27.60    1.10
 -20   0   0   24.90    1.50
  20   0   0   26.50    1.70
 -22   0   0    5.20    0.80
 -22   0   0    4.40    0.90
 -22   0   0    5.40    0.80
  22   0   0    4.30    0.70
  22   0   0    4.80    0.90
  22   0   0    4.70    0.90
  22   0   0    5.20    0.50
  22   0   0    5.10    0.50
  22   0   0    5.70    0.90
  22   0   0    5.30    0.50
  22   0   0    5.30    0.50
  22   0   0    4.40    0.60
  24   0   0   75.39    2.90
  24   0   0   75.49    3.40
  24   0   0   74.29    3.50
  24   0   0   75.89    3.00
  24   0   0   81.29    3.60
 -24   0   0   74.49    3.30
  24   0   0   83.89    3.40
 -24   0   0   74.19    3.50
 -24   0   0   74.19    3.30
  24   0   0   81.09    3.10
  26   0   0   31.50    2.00
  26   0   0   33.00    2.00
  26   0   0   31.80    1.50
 -26   0   0   31.90    2.20
  26   0   0   34.40    2.20
  26   0   0   31.90    1.50
 -26   0   0   31.90    1.90
  26   0   0   36.10    2.10
 -26   0   0   32.60    1.90
  28   0   0   10.70    0.90
  28   0   0   10.60    0.90
 -28   0   0    9.50    1.20
  28   0   0   12.10    1.30
  28   0   0   10.80    1.40
  28   0   0    9.10    1.30
 -28   0   0    9.60    1.20
 -28   0   0    8.90    1.30
  28   0   0   11.30    1.50
 -30   0   0    4.70    1.30
 -30   0   0    6.40    1.20
  30   0   0    5.30    1.30
 -30   0   0    5.00    1.10
  30   0   0    3.40    1.10
  30   0   0    5.60    0.70
  30   0   0    5.00    0.70
  30   0   0    4.40    1.10
 -30   0   0    3.60    1.00
  32   0   0   -1.80    1.00
 -32   0   0    0.30    1.00
 -32   0   0   -1.10    0.80
  32   0   0    1.00    0.60
 -32   0   0    0.30    1.10
  32   0   0    1.10    1.10
 -32   0   0    0.00    0.80
  32   0   0    0.10    0.50
  32   0   0    0.90    0.90
  -1  -1   0   35.10    1.30
  -1  -1   0   34.90    1.30
   1  -1   0   35.40    1.30
  -1  -1   0   36.10    1.30
   1  -1   0   35.90    1.30
  -1   1   0   36.10    1.30
   1   1   0   35.60    1.30
   1   1   0   35.80    1.30
  -3  -1   0  617.94   21.50
  -3  -1   0  609.34   20.70
   3  -1   0  625.24   20.90
   3  -1   0  632.14   21.10
   3  -1   0  573.74   21.20
   3  -1   0  609.54   21.50
   3  -1   0  621.84   20.90
   3   1   0  621.04   21.10
   3   1   0  613.84   21.40
   3   1   0  622.24   20.90
   3   1   0  647.34   21.20
   5  -1   0  702.23   24.30
   5  -1   0  676.83   24.60
   5  -1   0  702.93   23.70
   5  -1   0  705.73   24.80
   5  -1   0  723.03   24.10
   5  -1   0  730.33   24.30
  -5  -1   0  716.63   23.90
  -5  -1   0  724.03   24.50
   5  -1   0  711.23   25.00
   5  -1   0  676.93   24.60
  -5  -1   0  712.33   24.80
   5  -1   0  724.23   24.60
   5  -1   0  711.33   24.10
   5   1   0  676.43   24.80
   5   1   0  719.03   23.70
   5   1   0  749.03   23.80
   5   1   0  734.03   25.10
   5   1   0  726.83   24.40
   7  -1   0   48.10    1.80
   7  -1   0   50.69    1.90
  -7  -1   0   47.60    2.00
   7  -1   0   49.50    1.80
   7  -1   0   49.40    1.80
  -7  -1   0   50.89    1.90
   7  -1   0   47.70    2.00
   7  -1   0   48.20    1.90
   7  -1   0   51.49    1.90
   7  -1   0   47.80    1.90
  -7  -1   0   49.80    1.80
   7   1   0   48.80    1.90
   7   1   0   48.60    1.90
   7   1   0   51.79    1.80
   7   1   0   49.80    2.00
   7   1   0   48.50    1.80
   7   1   0   50.99    1.80
   7   1   0   49.80    1.80
   9  -1   0  321.67   11.30
   9  -1   0  335.87   11.70
   9  -1   0  280.37   11.20
  -9  -1   0  338.17   11.50
   9  -1   0  332.67   11.10
  -9  -1   0  331.27   11.20
   9  -1   0  338.47   11.30
  -9  -1   0  330.27   11.70
   9  -1   0  313.87   11.60
  -9   1   0  330.77   11.30
   9   1   0  347.27   11.30
   9   1   0  325.27   11.80
   9   1   0  320.97   11.10
   9   1   0  338.37   11.30
   9   1   0  344.07   11.50
  11  -1   0  129.19    4.30
 -11  -1   0  123.39    4.70
  11  -1   0  118.89    4.50
  11  -1   0  124.89    4.50
 -11  -1   0  124.09    4.50
  11  -1   0  125.79    4.60
  11  -1   0  134.09    4.30
  11  -1   0  116.19    4.30
 -11  -1   0  122.49    4.40
  11  -1   0  124.29    4.70
  11  -1   0  122.29    4.30
  11   1   0  118.59    4.40
  11   1   0  117.79    4.40
  11   1   0  120.59    4.40
  11   1   0  132.59    4.70
 -11   1   0  126.29    4.50
  11   1   0  118.29    4.50
  11   1   0  125.79    4.40
  11   1   0  121.29    4.40
  11   1   0  129.79    4.40
  11   1   0  129.59    4.40
  11   1   0  118.39    4.50
 -13  -1   0  150.78    5.40
  13  -1   0  140.49    5.10
  13  -1   0  144.79    5.50
  13  -1   0  139.89    5.10
  13  -1   0  150.48    5.40
 -13  -1   0  142.59    5.50
  13  -1   0  138.89    5.10
  13  -1   0  146.09    5.30
  13  -1   0  155.78    5.10
  13  -1   0  130.99    5.40
 -13  -1   0  140.89    5.20
  13  -1   0  151.98    5.50
  13   1   0  148.89    5.20
  13   1   0  156.98    5.20
  13   1   0  147.49    5.50
  13   1   0  146.99    5.20
  13   1   0  146.49    5.40
 -13   1   0  142.29    5.40
  13   1   0  156.38    5.20
  13   1   0  145.89    5.40
  13   1   0  141.29    5.20
  13   1   0  147.59    5.50
 -13   1   0  143.59    5.30
  13   1   0  162.18    5.30
  15  -1   0  109.49    4.10
  15  -1   0   97.59    3.60
 -15  -1   0  101.09    3.80
  15  -1   0  101.69    3.90
  15  -1   0  102.59    3.90
  15  -1   0   95.49    3.60
 -15  -1   0  105.09    4.10
 -15  -1   0   96.29    3.90
  15  -1   0  100.69    3.60
  15  -1   0  104.59    4.00
  15  -1   0  109.09    3.60
  15  -1   0   95.19    3.90
  15   1   0  103.19    4.00
  15   1   0  100.79    3.70
  15   1   0  111.29    3.80
 -15   1   0  102.09    3.90
  15   1   0   87.89    3.70
  15   1   0  100.89    3.70
  15   1   0  102.89    3.80
  15   1   0  100.69    3.70
  15   1   0  108.89    4.10
  15   1   0  114.49    3.70
  15   1   0  108.49    4.00
  15   1   0  104.79    4.00
 -15   1   0  103.69    4.00
  17  -1   0   42.80    2.00
 -17  -1   0   38.60    1.80
  17  -1   0   40.20    1.70
  17  -1   0   34.90    1.90
  17  -1   0   40.00    1.90
  17  -1   0   39.50    1.90
 -17  -1   0   40.90    2.00
  17  -1   0   38.20    1.50
  17  -1   0   42.40    1.80
  17  -1   0   39.40    1.50
  17  -1   0   42.50    1.60
 -17  -1   0   37.00    1.80
  17  -1   0   43.30    1.50
  17   1   0   37.40    1.60
 -17   1   0   39.80    1.90
 -17   1   0   36.50    1.80
  17   1   0   40.10    2.00
  17   1   0   42.90    1.70
  17   1   0   40.60    1.70
  17   1   0   40.20    2.00
  17   1   0   41.20    1.90
  17   1   0   37.90    1.60
  17   1   0   38.90    1.60
  17   1   0   38.10    1.60
  17   1   0   42.90    1.60
  17   1   0   40.40    1.90
  19  -1   0    0.60    0.20
  19  -1   0    0.50    0.20
  19  -1   0    0.40    0.30
  19  -1   0    0.90    0.60
 -19  -1   0    0.60    0.50
  19  -1   0    0.90    0.50
 -19  -1   0    0.10    0.40
  19  -1   0    0.70    0.40
  19  -1   0    0.10    0.20
  19  -1   0    0.30    0.50
  19  -1   0    0.60    0.50
 -19  -1   0    0.40    0.50
  19   1   0    0.30    0.60
  19   1   0    0.80    0.30
 -19   1   0    0.60    0.50
  19   1   0    0.50    0.50
  19   1   0    0.70    0.50
 -19   1   0    0.00    0.40
  19   1   0    0.00    0.20
  19   1   0    0.30    0.20
  19   1   0    1.40    0.50
  19   1   0    0.40    0.30
  19   1   0    0.70    0.50
  19   1   0    0.20    0.30
  19   1   0    0.60    0.30
 -21  -1   0   14.60    1.10
  21  -1   0   13.50    0.80
  21  -1   0   12.10    1.20
  21  -1   0   13.60    1.20
 -21  -1   0   15.50    1.30
  21  -1   0   15.70    0.80
  21  -1   0   16.00    0.80
  21  -1   0   14.80    1.00
  21  -1   0   15.50    0.80
  21  -1   0   14.90    1.20
  21  -1   0   14.90    1.10
 -21  -1   0   13.70    1.00
  21   1   0   16.30    1.00
  21   1   0   13.20    1.30
  21   1   0   14.00    0.90
  21   1   0   15.20    0.90
  21   1   0   14.90    1.40
 -21   1   0   12.10    1.10
 -21   1   0   14.10    1.20
  21   1   0   16.70    1.00
  21   1   0   14.80    1.20
  21   1   0   17.20    0.80
  21   1   0   13.90    0.70
  21   1   0   15.50    0.90
  21   1   0   13.20    1.30
  23  -1   0   20.30    1.50
  23  -1   0   20.00    1.50
  23  -1   0   18.30    1.10
 -23  -1   0   16.90    1.50
 -23  -1   0   19.10    1.30
  23  -1   0   18.50    1.00
 -23  -1   0   17.60    1.30
  23  -1   0   18.20    0.90
  23  -1   0   18.10    1.40
  23  -1   0   18.00    1.30
  23  -1   0   20.00    1.00
  23  -1   0   18.70    1.00
  23   1   0   18.80    1.50
 -23   1   0   17.20    1.40
 -23   1   0   17.80    1.40
  23   1   0   19.50    1.50
  23   1   0   18.40    1.40
  23   1   0   20.00    1.40
  23   1   0   18.30    1.10
 -23   1   0   16.90    1.40
  23   1   0   18.40    1.00
  23   1   0   17.60    0.80
  23   1   0   18.70    0.80
  23   1   0   20.40    1.20
  25  -1   0   16.10    1.20
  25  -1   0   14.30    1.40
  25  -1   0   14.40    0.90
 -25  -1   0   14.50    1.50
 -25  -1   0   13.10    1.20
 -25  -1   0   13.50    1.20
  25  -1   0   14.40    0.90
  25  -1   0   14.20    1.40
 -25  -1   0   14.90    1.50
  25  -1   0   16.70    1.60
  25   1   0   14.40    1.10
  25   1   0   15.50    1.40
  25   1   0   14.10    1.50
  25   1   0   14.10    0.90
 -25   1   0   14.70    1.50
 -25   1   0   14.50    1.30
 -25   1   0   14.40    1.40
  25   1   0   14.70    1.00
  25   1   0   16.60    1.50
  25   1   0   14.20    1.40
 -27  -1   0    5.10    1.10
  27  -1   0    4.50    1.10
 -27  -1   0    6.30    1.10
  27  -1   0    5.30    0.80
  27  -1   0    4.10    1.10
  27  -1   0    5.40    0.60
 -27  -1   0    6.70    1.00
  27  -1   0    4.70    0.60
  27  -1   0    5.30    1.10
 -27  -1   0    6.40    1.00
 -27   1   0    4.80    0.90
  27   1   0    5.70    1.20
  27   1   0    4.30    0.70
  27   1   0    4.60    1.00
  27   1   0    5.50    1.10
  27   1   0    5.50    1.10
 -27   1   0    3.50    1.00
 -27   1   0    4.70    1.10
  27   1   0    6.00    0.70
  29  -1   0   46.50    2.70
 -29  -1   0   47.20    2.40
 -29  -1   0   41.40    2.40
  29  -1   0   46.40    2.00
  29  -1   0   44.00    2.70
 -29  -1   0   46.90    2.80
 -29  -1   0   46.80    2.70
  29  -1   0   46.90    2.00
  29  -1   0   46.60    2.70
 -29   1   0   46.40    2.60
 -29   1   0   44.30    2.80
 -29   1   0   45.00    2.50
  29   1   0   46.60    2.10
  29   1   0   46.80    2.80
  29   1   0   44.80    2.10
  29   1   0   42.90    2.60
  29   1   0   49.80    2.60
  29   1   0   44.30    2.80
 -31  -1   0    0.80    1.10
  31  -1   0   -0.10    0.50
 -31  -1   0    1.00    0.80
 -31  -1   0   -1.00    1.10
  31  -1   0    0.00    0.80
  31  -1   0   -1.60    1.00
  31  -1   0    0.30    0.50
  31  -1   0    2.00    1.10
 -31   1   0    2.50    1.00
  31   1   0    1.90    1.10
  31   1   0   -0.10    1.10
  31   1   0    0.80    0.60
 -31   1   0    0.80    0.70
  31   1   0    0.10    0.50
 -31   1   0    2.10    1.10
  31   1   0    0.90    1.10
  33  -1   0    1.40    1.00
  33  -1   0    0.40    0.60
 -33  -1   0    1.10    1.20
 -33  -1   0   -0.80    1.00
  33  -1   0    0.30    0.90
  33  -1   0    0.50    1.00
  33  -1   0    0.20    0.50
 -33   1   0    0.50    1.00
  33   1   0   -0.30    0.60
  33   1   0   -0.10    0.60
 -33   1   0    0.10    1.00
  33   1   0    1.00    1.20
  33   1   0    0.30    1.20
 -33   1   0    2.10    1.20
  33   1   0    1.50    1.20
 -33   1   0    1.10    1.20
   0  -2   0   67.79    2.50
   0  -2   0   68.69    2.50
   0  -2   0   68.29    2.50
   0  -2   0   66.39    2.50
   0  -2   0   68.89    2.40
   0  -2   0   63.99    2.50
   0   2   0   67.09    2.60
   0   2   0   68.39    2.50
   2  -2   0  844.42   29.60
  -2  -2   0  898.11   29.50
  -2  -2   0  845.82   29.00
   2  -2   0  824.62   29.40
  -2  -2   0  861.41   29.30
  -2  -2   0  877.31   28.70
   2  -2   0  861.01   29.30
   2  -2   0  868.71   29.00
   2  -2   0  869.61   28.90
   2  -2   0  864.01   29.60
   2   2   0  836.02   29.30
   2   2   0  857.41   28.60
   2   2   0  873.41   30.20
   2   2   0  837.52   29.70
   2   2   0  861.21   29.40
  -2   2   0  834.12   29.30
   2   2   0  834.22   29.70
  -2   2   0  874.91   30.10
   4  -2   0  252.87    8.30
  -4  -2   0  238.98    8.40
  -4  -2   0  238.28    8.30
  -4  -2   0  252.37    8.40
   4  -2   0  203.88    8.30
   4  -2   0  249.88    8.40
   4  -2   0  243.68    8.60
  -4  -2   0  240.98    8.60
   4  -2   0  227.78    8.50
  -4  -2   0  258.87    8.20
   4  -2   0  246.28    8.30
   4   2   0  245.38    8.40
   4   2   0  245.88    8.40
   4   2   0  236.78    8.50
   4   2   0  246.18    8.20
   4   2   0  240.28    8.30
  -6  -2   0  676.43   22.90
  -6  -2   0  657.23   22.60
   6  -2   0  622.44   22.80
   6  -2   0  661.53   22.50
   6  -2   0  621.14   23.00
   6  -2   0  676.63   23.20
  -6  -2   0  662.43   23.20
   6  -2   0  678.33   22.60
   6  -2   0  694.73   23.00
  -6  -2   0  669.83   22.30
   6  -2   0  677.63   22.70
   6  -2   0  677.83   22.80
   6   2   0  676.43   22.90
   6   2   0  657.13   22.80
   6   2   0  647.54   22.60
   6   2   0  669.23   22.80
   6   2   0  663.33   23.50
   6   2   0  671.83   23.10
  -8  -2   0   81.99    3.00
   8  -2   0   80.19    3.00
   8  -2   0   85.09    2.90
   8  -2   0   83.49    2.90
  -8  -2   0   80.29    3.10
  -8  -2   0   83.39    2.90
   8  -2   0   80.69    3.00
   8  -2   0   71.69    3.00
   8  -2   0   83.79    2.90
   8   2   0   84.29    2.80
   8   2   0   76.29    3.00
   8   2   0   82.19    3.00
   8   2   0   77.89    3.00
 -10  -2   0    0.50    0.30
 -10  -2   0    0.30    0.40
  10  -2   0    0.20    0.20
  10  -2   0    0.40    0.20
  10  -2   0    0.10    0.30
  10  -2   0    0.70    0.20
  10  -2   0    0.30    0.20
  10  -2   0    0.40    0.30
  10  -2   0    0.50    0.30
 -10  -2   0   -0.30    0.10
  10  -2   0    0.30    0.40
  10  -2   0    0.30    0.20
 -10  -2   0    0.20    0.30
  10  -2   0    0.80    0.20
  10  -2   0    0.30    0.30
  10   2   0    0.80    0.30
  10   2   0    0.40    0.30
  10   2   0    0.30    0.20
  10   2   0    0.00    0.10
  10   2   0    0.60    0.20
  10   2   0    0.10    0.30
  10   2   0   -0.10    0.30
  10   2   0    0.50    0.40
  10   2   0    0.40    0.30
  10   2   0    0.50    0.40
  12  -2   0   80.79    2.90
  12  -2   0   79.09    2.90
  12  -2   0   87.79    3.00
  12  -2   0   87.59    2.90
  12  -2   0   82.99    3.00
  12  -2   0   82.69    3.00
  12  -2   0   82.39    3.30
 -12  -2   0   83.99    3.10
  12  -2   0   81.79    3.20
  12  -2   0   85.69    3.00
  12  -2   0   78.39    3.30
  12  -2   0   85.19    3.20
  12  -2   0   86.29    3.20
 -12  -2   0   82.19    3.10
 -12  -2   0   80.49    3.30
  12   2   0   90.29    3.20
  12   2   0   86.19    3.40
  12   2   0   73.39    3.10
  12   2   0   85.79    3.10
  12   2   0   80.69    3.10
  12   2   0   83.79    3.20
  12   2   0   83.59    3.30
 -12   2   0   83.59    3.20
  12   2   0   84.99    3.10
  14  -2   0    2.20    0.20
  14  -2   0    2.20    0.40
  14  -2   0    1.80    0.20
  14  -2   0    1.90    0.50
  14  -2   0    1.80    0.20
 -14  -2   0    1.80    0.50
  14  -2   0    2.30    0.20
 -14  -2   0    2.00    0.40
  14  -2   0    1.10    0.30
  14  -2   0    1.90    0.50
 -14  -2   0    2.30    0.40
  14  -2   0    2.90    0.50
  14  -2   0    1.90    0.50
  14   2   0    1.70    0.30
  14   2   0    1.90    0.30
  14   2   0    1.90    0.50
  14   2   0    2.60    0.50
  14   2   0    2.00    0.40
  14   2   0    2.10    0.40
  14   2   0    2.60    0.50
 -14   2   0    1.80    0.50
  14   2   0    2.30    0.40
  14   2   0    2.20    0.50
  14   2   0    1.70    0.30
  16  -2   0    4.40    0.30
  16  -2   0    4.90    0.70
  16  -2   0    4.50    0.30
  16  -2   0    4.20    0.70
  16  -2   0    4.00    0.30
  16  -2   0    3.60    0.20
  16  -2   0    3.70    0.30
 -16  -2   0    3.80    0.50
  16  -2   0    3.70    0.50
 -16  -2   0    4.10    0.70
  16  -2   0    3.00    0.60
  16  -2   0    3.20    0.60
  16  -2   0    3.10    0.40
 -16  -2   0    3.90    0.50
  16  -2   0    4.30    0.30
  16   2   0    4.80    0.50
  16   2   0    3.30    0.40
  16   2   0    3.40    0.70
  16   2   0    4.00    0.40
  16   2   0    4.60    0.50
 -16   2   0    4.20    0.70
  16   2   0    3.60    0.50
  16   2   0    4.00    0.70
  16   2   0    4.50    0.60
  16   2   0    3.30    0.60
  16   2   0    3.60    0.40
  16   2   0    3.70    0.60
  18  -2   0   43.70    2.20
  18  -2   0   47.40    1.80
  18  -2   0   46.90    2.20
 -18  -2   0   37.70    2.10
 -18  -2   0   46.40    2.20
  18  -2   0   41.00    1.70
  18  -2   0   48.30    2.00
  18  -2   0   41.40    1.70
 -18  -2   0   45.80    2.00
  18  -2   0   46.60    1.90
  18  -2   0   46.10    2.20
 -18  -2   0   47.40    2.00
  18  -2   0   47.60    1.70
  18  -2   0   46.40    2.20
  18   2   0   45.50    2.00
  18   2   0   43.70    1.80
  18   2   0   44.60    1.90
  18   2   0   46.00    2.20
  18   2   0   47.00    2.20
  18   2   0   47.30    1.90
 -18   2   0   45.50    2.20
  18   2   0   50.19    2.00
  18   2   0   46.10    2.20
 -18   2   0   46.00    2.10
  18   2   0   45.00    1.90
  20  -2   0   68.79    2.70
  20  -2   0   68.49    3.00
  20  -2   0   75.19    2.70
  20  -2   0   65.99    2.60
  20  -2   0   78.19    3.30
  20  -2   0   75.09    3.20
 -20  -2   0   66.19    3.20
  20  -2   0   73.69    2.80
  20  -2   0   75.79    2.70
 -20  -2   0   72.89    2.90
 -20  -2   0   71.99    3.00
  20  -2   0   67.29    3.10
 -20  -2   0   74.39    3.20
  20  -2   0   71.39    3.00
  20   2   0   69.49    3.10
  20   2   0   69.99    2.80
  20   2   0   68.19    2.70
  20   2   0   74.89    2.80
  20   2   0   69.79    3.20
 -20   2   0   69.09    3.10
  20   2   0   75.99    2.90
  20   2   0   67.49    3.20
  20   2   0   73.19    2.70
  20   2   0   72.79    3.20
  20   2   0   74.59    2.80
  20   2   0   71.69    2.90
 -20   2   0   69.19    3.10
  22  -2   0    5.50    0.50
  22  -2   0    5.90    0.50
  22  -2   0    6.70    1.00
  22  -2   0    4.80    0.50
  22  -2   0    6.50    0.70
  22  -2   0    5.00    0.90
 -22  -2   0    4.30    1.00
  22  -2   0    5.70    0.90
 -22  -2   0    3.50    0.70
  22  -2   0    6.40    0.80
 -22  -2   0    4.50    0.90
 -22  -2   0    5.40    0.80
  22  -2   0    5.40    0.50
  22   2   0    6.00    0.60
  22   2   0    4.70    0.60
 -22   2   0    5.20    1.00
  22   2   0    4.50    0.50
 -22   2   0    4.50    0.80
  22   2   0    4.80    0.80
  22   2   0    4.90    0.60
  22   2   0    4.60    1.00
  22   2   0    4.50    0.90
  22   2   0    4.20    0.90
  22   2   0    6.10    1.00
  24  -2   0   23.00    1.10
  24  -2   0   25.00    1.30
 -24  -2   0   20.30    1.60
  24  -2   0   23.50    1.80
  24  -2   0   21.80    1.10
 -24  -2   0   22.80    1.50
  24  -2   0   25.10    1.50
 -24  -2   0   23.40    1.40
  24  -2   0   24.00    1.60
  24  -2   0   25.00    1.10
 -24  -2   0   22.60    1.70
  24  -2   0   23.30    1.60
  24   2   0   24.20    1.60
  24   2   0   21.90    1.10
 -24   2   0   20.50    1.70
  24   2   0   24.00    1.10
  24   2   0   22.00    1.60
  24   2   0   22.00    1.30
  24   2   0   22.00    1.70
  24   2   0   23.30    1.40
  24   2   0   23.60    1.80
  24   2   0   20.60    1.30
 -24   2   0   21.90    1.60
  26  -2   0    0.50    0.40
 -26  -2   0   -0.60    0.60
  26  -2   0   -0.30    0.80
  26  -2   0    0.60    0.70
 -26  -2   0   -0.70    0.60
 -26  -2   0   -0.50    0.80
  26  -2   0   -0.90    0.40
  26  -2   0    0.70    0.90
 -26  -2   0    0.60    0.80
  26   2   0    0.10    0.30
 -26   2   0    0.50    0.80
  26   2   0   -0.20    0.70
  26   2   0   -0.50    0.70
 -26   2   0    0.40    0.70
  26   2   0    1.30    0.70
  26   2   0    0.40    0.50
  26   2   0   -0.30    0.80
  26   2   0   -0.30    0.70
  26   2   0   -0.30    0.30
  26   2   0    0.10    0.50
 -28  -2   0    1.90    1.00
  28  -2   0    3.90    1.00
  28  -2   0    3.30    0.50
  28  -2   0    1.70    1.00
 -28  -2   0    3.40    1.20
  28  -2   0    3.20    0.60
  28  -2   0    2.60    1.00
 -28  -2   0    4.20    0.90
 -28   2   0    2.40    1.00
  28   2   0    2.40    1.00
  28   2   0    2.70    1.00
  28   2   0    1.30    0.60
 -28   2   0    1.80    0.90
  28   2   0    3.60    1.10
  28   2   0    2.00    0.90
  28   2   0    4.60    0.70
 -28   2   0    3.30    1.10
  28   2   0    3.20    0.30
 -30  -2   0   17.00    1.80
  30  -2   0   18.00    1.90
 -30  -2   0   18.10    1.90
  30  -2   0   17.10    1.10
  30  -2   0   18.60    1.80
  30  -2   0   17.00    1.10
  30  -2   0   16.70    1.80
  30   2   0   18.90    1.90
  30   2   0   17.40    1.80
 -30   2   0   15.60    1.70
 -30   2   0   17.60    1.70
  30   2   0   17.20    1.80
  30   2   0   20.20    1.80
  30   2   0   17.50    1.30
 -30   2   0   15.60    1.60
  30   2   0   18.20    1.30
  32  -2   0    3.00    0.60
 -32  -2   0    2.70    1.30
  32  -2   0    3.20    0.60
  32  -2   0    2.40    1.00
  32  -2   0    0.50    1.00
  32  -2   0    1.50    1.00
 -32  -2   0    2.00    1.10
  32   2   0    2.10    1.20
 -32   2   0    3.00    1.30
 -32   2   0    1.20    1.00
  32   2   0    3.00    0.80
  32   2   0    1.60    0.70
  32   2   0    1.60    1.00
  32   2   0    1.50    1.10
  32   2   0    1.90    1.10
 -32   2   0    2.00    1.10
   1  -3   0 1021.60   35.40
   1  -3   0 1027.20   35.00
   1  -3   0  982.30   34.50
  -1  -3   0 1011.70   35.00
  -1  -3   0 1026.30   34.50
  -1  -3   0 1054.19   35.20
   1  -3   0 1014.30   35.20
  -1  -3   0 1011.10   35.10
  -1  -3   0 1017.60   34.60
  -1  -3   0  967.60   35.40
   1  -3   0 1027.40   34.60
   1  -3   0 1004.70   35.00
  -1   3   0 1037.00   34.00
   1   3   0 1024.30   35.40
   1   3   0 1008.80   35.00
  -1   3   0 1056.39   35.90
   1   3   0 1036.00   34.00
  -1   3   0 1031.10   35.00
   1   3   0 1020.70   35.10
   1   3   0 1030.40   35.90
  -3  -3   0 2724.63   89.89
   3  -3   0 2612.04   90.59
   3  -3   0 2518.25   88.79
  -3  -3   0 2586.14   88.09
   3  -3   0 2331.07   89.99
   3  -3   0 2755.52   88.19
  -3  -3   0 2916.11   89.49
   3  -3   0 2638.54   87.89
   3  -3   0 2699.93   89.79
  -3  -3   0 2667.13   89.99
  -3  -3   0 2490.25   90.89
  -3  -3   0 2659.23   88.79
   3  -3   0 2433.96   89.19
   3   3   0 2512.45   89.09
   3   3   0 2560.84   89.29
   3   3   0 2583.74   89.89
   3   3   0 2506.45   89.99
   3   3   0 2596.04   86.79
   3   3   0 2593.24   91.59
  -3   3   0 2693.43   88.89
  -3   3   0 2624.54   91.59
   3   3   0 2555.24   88.89
   5  -3   0   18.80    0.70
  -5  -3   0   17.70    0.90
  -5  -3   0   16.60    0.90
  -5  -3   0   17.40    0.80
   5  -3   0   17.00    0.90
   5  -3   0   16.60    0.90
  -5  -3   0   17.30    0.90
   5  -3   0   15.50    0.80
   5  -3   0   16.30    0.80
   5  -3   0   17.10    0.80
   5  -3   0   15.00    0.80
  -5  -3   0   18.30    0.80
   5  -3   0   18.80    0.80
   5   3   0   16.30    0.90
   5   3   0   15.90    0.90
   5   3   0   15.80    0.80
   5   3   0   17.60    0.90
   5   3   0   17.60    0.90
   7  -3   0    0.70    0.30
   7  -3   0    0.10    0.20
  -7  -3   0   -0.20    0.20
   7  -3   0    0.10    0.10
   7  -3   0   -0.20    0.10
   7  -3   0   -0.30    0.20
  -7  -3   0    0.10    0.30
  -7  -3   0    0.20    0.30
   7  -3   0    0.10    0.20
   7  -3   0    0.00    0.10
   7  -3   0    0.10    0.20
  -7  -3   0    0.20    0.30
  -7  -3   0    0.10    0.20
  -7  -3   0    0.40    0.20
   7  -3   0    0.10    0.30
   7   3   0    0.00    0.30
   7   3   0    0.10    0.20
   7   3   0    0.40    0.30
   7   3   0    0.60    0.30
   7   3   0    0.20    0.20
   7   3   0    0.10    0.30
  -9  -3   0    1.50    0.30
   9  -3   0    1.70    0.40
   9  -3   0    1.50    0.30
   9  -3   0    1.30    0.30
  -9  -3   0    1.70    0.40
  -9  -3   0    1.20    0.50
   9  -3   0    1.30    0.30
  -9  -3   0    1.00    0.40
   9  -3   0    1.90    0.40
   9  -3   0    1.30    0.40
   9  -3   0    1.20    0.30
   9  -3   0    1.00    0.30
   9  -3   0    1.10    0.40
   9  -3   0    1.40    0.30
  -9  -3   0    1.60    0.30
   9   3   0    1.10    0.40
   9   3   0    1.40    0.30
   9   3   0    2.30    0.50
   9   3   0    1.30    0.40
   9   3   0    0.40    0.40
   9   3   0    1.10    0.30
   9   3   0    1.80    0.40
   9   3   0    1.20    0.40
 -11  -3   0    4.30    0.40
  11  -3   0    3.60    0.50
  11  -3   0    3.90    0.40
  11  -3   0    4.50    0.40
  11  -3   0    4.40    0.60
  11  -3   0    4.20    0.40
 -11  -3   0    3.90    0.60
  11  -3   0    4.50    0.40
 -11  -3   0    4.80    0.60
 -11  -3   0    4.60    0.40
  11  -3   0    4.60    0.40
  11  -3   0    3.40    0.50
  11  -3   0    4.40    0.40
  11  -3   0    3.80    0.50
  11   3   0    4.10    0.70
  11   3   0    4.00    0.50
  11   3   0    4.10    0.30
  11   3   0    4.20    0.40
  11   3   0    3.70    0.50
  11   3   0    4.90    0.60
  11   3   0    3.60    0.50
  11   3   0    4.40    0.50
  13  -3   0    0.30    0.40
  13  -3   0    0.30    0.30
  13  -3   0    0.30    0.20
 -13  -3   0    0.50    0.40
  13  -3   0    0.80    0.40
  13  -3   0    0.50    0.50
 -13  -3   0    0.50    0.30
 -13  -3   0    0.20    0.40
 -13  -3   0    0.10    0.30
  13  -3   0   -0.30    0.50
  13  -3   0    0.50    0.20
  13  -3   0    0.50    0.20
  13  -3   0    0.20    0.20
  13  -3   0    0.60    0.30
  13   3   0    0.20    0.20
  13   3   0    0.50    0.60
  13   3   0    0.30    0.40
  13   3   0    1.00    0.40
  13   3   0    0.70    0.60
  13   3   0    0.30    0.30
  15  -3   0    4.60    0.70
  15  -3   0    5.50    0.70
  15  -3   0    4.30    0.40
 -15  -3   0    5.60    0.60
  15  -3   0    6.30    0.80
 -15  -3   0    2.10    0.50
  15  -3   0    4.70    0.40
  15  -3   0    4.70    0.40
 -15  -3   0    5.80    0.60
  15  -3   0    4.70    0.40
 -15  -3   0    7.40    0.80
  15  -3   0    5.20    0.70
  15  -3   0    5.10    0.40
  15   3   0    6.30    0.80
  15   3   0    4.90    0.70
  15   3   0    5.70    0.60
  15   3   0    6.60    0.60
  15   3   0    5.50    0.70
 -15   3   0    5.10    0.70
  15   3   0    6.90    0.70
 -17  -3   0    4.30    0.80
 -17  -3   0    3.70    0.50
  17  -3   0    4.90    0.70
  17  -3   0    5.40    0.70
  17  -3   0    5.30    0.80
  17  -3   0    4.50    0.40
 -17  -3   0    3.80    0.60
  17  -3   0    4.80    0.40
  17  -3   0    4.90    0.60
  17  -3   0    5.80    0.90
  17  -3   0    4.50    0.30
  17  -3   0    4.90    0.40
  17  -3   0    4.80    0.40
  17  -3   0    3.90    0.30
  17   3   0    5.10    0.80
 -17   3   0    4.50    0.80
  17   3   0    5.60    0.80
  17   3   0    5.30    0.70
  17   3   0    5.00    0.60
  17   3   0    4.60    0.70
  17   3   0    5.60    0.60
  17   3   0    4.80    0.60
  19  -3   0    9.30    1.00
 -19  -3   0   10.20    0.90
  19  -3   0   10.50    1.10
  19  -3   0   11.20    1.10
  19  -3   0    9.90    0.60
 -19  -3   0   10.20    1.10
  19  -3   0    9.60    1.00
  19  -3   0    9.80    0.70
  19  -3   0   10.10    0.60
  19  -3   0    9.00    0.70
 -19  -3   0   10.20    0.90
  19  -3   0    9.60    0.80
  19   3   0    9.00    1.00
 -19   3   0    8.50    1.00
  19   3   0   10.80    1.10
  19   3   0   10.50    0.90
 -19   3   0   10.80    1.10
  19   3   0   11.00    1.10
  19   3   0    8.00    0.70
  19   3   0    8.80    0.70
  21  -3   0    2.90    0.50
  21  -3   0    2.90    1.00
 -21  -3   0    2.90    0.90
 -21  -3   0    2.50    0.60
  21  -3   0    2.70    0.40
  21  -3   0    4.30    0.60
  21  -3   0    3.40    0.80
 -21  -3   0    3.60    0.90
  21  -3   0    3.30    0.40
 -21  -3   0    2.80    0.60
  21  -3   0    1.90    0.70
  21  -3   0    2.10    0.70
  21  -3   0    3.70    0.40
  21   3   0    3.90    0.60
  21   3   0    3.20    0.80
  21   3   0    2.90    0.60
  21   3   0    3.60    0.50
 -21   3   0    1.80    0.70
  21   3   0    2.70    0.80
 -21   3   0    2.80    0.90
  21   3   0    2.70    0.80
  21   3   0    2.50    0.80
  21   3   0    3.10    0.60
  21   3   0    3.10    0.70
  23  -3   0    0.10    0.40
  23  -3   0   -0.30    0.40
 -23  -3   0   -0.60    0.60
 -23  -3   0   -0.70    0.70
  23  -3   0   -0.40    0.30
  23  -3   0    0.10    0.50
  23  -3   0    0.80    0.80
  23  -3   0    0.30    0.70
  23  -3   0   -0.30    0.70
 -23  -3   0   -0.70    0.50
 -23  -3   0    0.30    0.70
  23  -3   0    1.10    0.90
 -23   3   0   -0.60    0.70
  23   3   0    0.40    0.70
  23   3   0    0.10    0.60
  23   3   0   -1.10    0.80
  23   3   0    0.30    0.50
  23   3   0    0.00    0.50
  23   3   0    0.60    0.70
  23   3   0   -1.00    0.60
  23   3   0   -0.40    0.50
 -23   3   0    0.10    0.80
  25  -3   0    1.10    0.80
  25  -3   0    0.80    0.40
 -25  -3   0   -0.30    0.60
  25  -3   0    0.30    0.40
  25  -3   0    0.50    0.80
 -25  -3   0    0.30    0.90
 -25  -3   0    0.00    0.90
  25  -3   0   -0.60    0.80
  25   3   0    0.40    0.80
  25   3   0    0.80    0.50
  25   3   0    0.90    0.80
  25   3   0    0.50    0.50
  25   3   0    1.00    0.60
  25   3   0    0.50    0.80
 -25   3   0   -1.10    0.60
  25   3   0    0.10    0.80
 -25   3   0    0.90    0.80
  25   3   0   -0.30    0.50
 -27  -3   0   10.60    1.50
 -27  -3   0    8.70    1.30
  27  -3   0    9.80    0.80
  27  -3   0    9.20    0.80
  27  -3   0    9.00    1.20
  27  -3   0    7.40    1.20
  27  -3   0    9.50    1.30
 -27   3   0    8.10    1.20
  27   3   0    9.40    1.10
  27   3   0   12.80    1.50
  27   3   0    9.40    1.30
  27   3   0    8.80    1.40
  27   3   0    8.40    0.90
 -27   3   0    6.10    1.10
  27   3   0    8.40    0.90
  27   3   0    7.70    0.70
  27   3   0    9.30    1.30
 -29  -3   0    7.20    1.40
 -29  -3   0    5.60    1.20
  29  -3   0    7.30    0.70
  29  -3   0    5.80    1.10
  29  -3   0    8.50    1.40
  29  -3   0    6.80    0.70
  29  -3   0    6.00    1.10
  29   3   0    9.00    1.50
  29   3   0    6.00    0.90
  29   3   0    7.80    1.40
  29   3   0    7.20    0.60
 -29   3   0    4.10    1.10
  29   3   0    4.90    1.20
 -29   3   0    7.10    1.30
  29   3   0    6.50    0.90
  31  -3   0    1.20    0.60
  31  -3   0    0.70    1.10
  31  -3   0    1.90    1.00
 -31  -3   0    2.00    1.20
  31  -3   0    1.10    1.10
  31  -3   0    2.10    0.60
 -31  -3   0    4.20    1.30
  31   3   0   -1.80    0.90
  31   3   0    1.40    0.70
 -31   3   0    0.90    1.00
  31   3   0    0.80    0.70
 -31   3   0    0.80    0.90
  31   3   0    0.90    1.00
 -31   3   0    1.50    1.20
  33  -3   0    7.90    1.60
 -33  -3   0    8.60    1.50
  33  -3   0    5.30    1.30
 -33  -3   0    5.60    1.50
  33  -3   0    8.20    0.90
  33  -3   0    6.70    0.80
  33  -3   0    8.00    1.50
 -33   3   0    7.00    1.30
 -33   3   0    7.90    1.50
  33   3   0    5.50    1.00
  33   3   0    5.90    1.00
  33   3   0    4.20    1.30
  33   3   0    6.90    1.40
 -33   3   0    7.90    1.40
   0  -4   0 1249.77   40.70
   0  -4   0 1209.78   41.50
   0  -4   0 1196.78   41.30
   0  -4   0 1109.89   41.40
   0  -4   0 1214.78   41.80
   0   4   0 1178.68   41.70
   0   4   0 1216.78   41.40
   0   4   0 1215.18   41.30
   0   4   0 1255.97   42.40
   0   4   0 1192.18   40.20
   2  -4   0  107.99    3.80
   2  -4   0  101.89    3.80
  -2  -4   0  109.79    3.90
   2  -4   0  107.49    3.90
  -2  -4   0  103.09    3.90
  -2  -4   0  102.79    3.80
  -2  -4   0  104.59    3.80
   2  -4   0   98.79    3.80
  -2  -4   0  101.99    3.70
   2  -4   0  105.49    3.70
   2   4   0  104.79    3.80
   2   4   0  101.79    3.90
  -2   4   0  101.69    3.80
   2   4   0  102.09    3.70
   2   4   0  103.19    3.90
  -2   4   0  100.79    3.70
  -2   4   0  103.39    3.90
   2   4   0  103.89    3.90
  -4  -4   0   23.50    1.10
  -4  -4   0   21.70    1.10
  -4  -4   0   23.00    1.20
  -4  -4   0   22.90    1.10
   4  -4   0   22.50    1.10
  -4  -4   0   23.80    1.00
   4  -4   0   21.80    1.10
   4  -4   0   23.70    1.20
   4  -4   0   23.50    1.10
   4  -4   0   23.40    1.00
   4   4   0   22.50    1.10
   4   4   0   21.90    1.20
   4   4   0   23.80    1.20
   4   4   0   22.60    1.10
  -4   4   0   24.50    1.10
   4   4   0   23.30    1.10
   4   4   0   22.90    1.10
  -4   4   0   22.00    1.10
  -6  -4   0    2.70    0.50
   6  -4   0    1.90    0.40
   6  -4   0    2.10    0.40
  -6  -4   0    1.70    0.50
   6  -4   0    1.80    0.30
  -6  -4   0    2.10    0.30
   6  -4   0    0.80    0.40
   6  -4   0    2.00    0.50
  -6  -4   0    2.30    0.30
   6  -4   0    2.40    0.40
   6  -4   0    2.80    0.40
   6  -4   0    0.90    0.40
   6  -4   0    2.00    0.40
   6   4   0    1.80    0.40
   6   4   0    1.90    0.40
   6   4   0    2.20    0.50
   6   4   0    1.90    0.40
   6   4   0    2.10    0.50
   6   4   0    1.50    0.40
   6   4   0    2.00    0.50
   8  -4   0   22.70    1.20
  -8  -4   0   22.50    1.30
   8  -4   0   20.40    1.00
  -8  -4   0   23.70    1.00
   8  -4   0   23.10    1.10
   8  -4   0   22.80    1.20
  -8  -4   0   20.60    1.20
  -8  -4   0   25.60    1.20
  -8  -4   0   23.60    1.00
   8  -4   0   22.90    1.20
   8  -4   0   23.50    1.10
   8   4   0   22.30    1.20
   8   4   0   24.60    1.10
   8   4   0   22.70    1.20
   8   4   0   23.10    1.20
   8   4   0   21.80    1.20
  10  -4   0   10.70    0.70
  10  -4   0    9.50    0.70
  10  -4   0    8.70    0.60
  10  -4   0   10.80    0.70
 -10  -4   0   10.20    0.60
 -10  -4   0    9.40    0.60
 -10  -4   0   10.10    0.90
 -10  -4   0   10.10    0.80
  10  -4   0   11.40    0.90
 -10  -4   0    8.00    0.80
 -10  -4   0    9.40    0.80
  10  -4   0   11.20    0.90
  10  -4   0    8.80    0.60
  10   4   0    9.10    0.80
  10   4   0    9.70    0.80
  10   4   0    8.20    0.70
  10   4   0    9.30    0.90
  10   4   0   10.30    0.80
  10   4   0   10.00    0.80
 -12  -4   0   55.99    2.50
 -12  -4   0   57.79    2.50
 -12  -4   0   57.59    2.20
  12  -4   0   57.99    2.40
  12  -4   0   52.79    2.20
  12  -4   0   55.19    2.50
  12  -4   0   61.59    2.30
  12  -4   0   57.49    2.20
 -12  -4   0   55.29    2.40
  12  -4   0   57.59    2.30
  12  -4   0   54.79    2.20
  12  -4   0   61.49    2.20
  12  -4   0   54.29    2.50
  12  -4   0   60.59    2.20
 -12  -4   0   59.49    2.20
  12   4   0   64.79    2.40
  12   4   0   55.29    2.10
  12   4   0   55.89    2.40
  12   4   0   58.99    2.50
  12   4   0   55.89    2.50
  12   4   0   59.89    2.10
  12   4   0   52.59    2.40
  12   4   0   56.19    2.30
  14  -4   0    8.40    0.60
  14  -4   0    8.30    0.90
  14  -4   0    9.30    0.80
  14  -4   0    9.10    0.60
 -14  -4   0    8.50    0.90
 -14  -4   0    8.50    0.90
 -14  -4   0   10.30    0.60
  14  -4   0    7.60    0.60
 -14  -4   0    8.80    0.90
  14  -4   0    8.10    0.90
  14  -4   0    8.40    0.60
  14  -4   0    8.40    0.60
 -14  -4   0    7.90    0.60
  14  -4   0    9.20    0.80
  14   4   0    7.50    0.90
  14   4   0    8.60    0.70
  14   4   0    7.90    0.50
  14   4   0    7.50    0.70
  14   4   0    9.00    1.00
  14   4   0    7.70    0.50
  14   4   0    7.10    0.70
  14   4   0   10.00    0.80
  16  -4   0  237.88    8.00
 -16  -4   0  233.58    8.20
  16  -4   0  237.78    8.60
 -16  -4   0  223.38    8.60
  16  -4   0  230.18    8.60
  16  -4   0  225.68    8.00
  16  -4   0  243.88    8.10
  16  -4   0  229.18    8.20
  16  -4   0  227.48    8.10
  16  -4   0  219.98    8.30
  16  -4   0  226.78    8.20
 -16  -4   0  225.18    8.00
  16   4   0  222.68    8.40
  16   4   0  212.98    8.30
 -16   4   0  228.88    8.30
  16   4   0  219.38    8.60
  16   4   0  253.87    8.30
 -18  -4   0    1.10    0.60
  18  -4   0    0.10    0.20
  18  -4   0    0.20    0.40
  18  -4   0    0.00    0.20
 -18  -4   0    0.40    0.40
  18  -4   0    0.50    0.70
  18  -4   0    0.30    0.50
  18  -4   0    0.50    0.50
  18  -4   0    0.50    0.40
 -18  -4   0    0.10    0.40
  18  -4   0    0.40    0.30
  18  -4   0    0.90    0.60
  18  -4   0    0.30    0.30
 -18  -4   0   -0.40    0.40
  18   4   0    0.20    0.30
  18   4   0    0.10    0.20
  18   4   0    0.40    0.60
  18   4   0    0.20    0.40
  18   4   0    0.40    0.40
 -18   4   0    0.20    0.60
  18   4   0    0.70    0.60
  20  -4   0   21.60    1.20
  20  -4   0   21.40    1.40
 -20  -4   0   21.90    1.60
  20  -4   0   22.10    1.60
 -20  -4   0   23.80    1.30
  20  -4   0   25.40    1.20
  20  -4   0   25.80    1.20
 -20  -4   0   24.10    1.30
  20  -4   0   25.30    0.90
  20  -4   0   21.70    1.50
 -20  -4   0   25.30    1.70
  20  -4   0   21.30    1.20
  20  -4   0   25.50    1.80
  20  -4   0   21.90    0.90
  20   4   0   22.60    1.30
  20   4   0   20.80    1.40
  20   4   0   23.40    1.60
  20   4   0   21.50    1.30
  20   4   0   21.30    1.40
 -20   4   0   25.30    1.70
  20   4   0   23.50    1.60
  22  -4   0    4.70    0.60
 -22  -4   0    6.40    1.10
  22  -4   0    4.60    0.90
  22  -4   0    4.80    0.60
 -22  -4   0    3.10    0.70
 -22  -4   0    5.10    1.00
  22  -4   0    5.00    1.10
  22  -4   0    3.30    0.80
  22  -4   0    5.00    1.00
  22   4   0    3.30    0.60
  22   4   0    5.30    0.70
  22   4   0    4.90    1.00
 -22   4   0    4.30    1.00
  22   4   0    4.30    0.90
  22   4   0    4.10    0.70
 -22   4   0    3.70    1.00
  22   4   0    4.10    0.80
  24  -4   0   14.30    1.50
  24  -4   0   14.00    1.30
  24  -4   0   13.20    1.40
  24  -4   0   14.10    0.90
 -24  -4   0   14.70    1.50
  24  -4   0   14.10    1.40
 -24  -4   0   15.50    1.50
  24  -4   0   12.90    0.90
  24   4   0   14.80    1.20
  24   4   0   12.50    1.10
 -24   4   0   13.40    1.40
  24   4   0   14.70    1.50
 -24   4   0   12.00    1.50
  24   4   0   14.90    1.30
  24   4   0   13.60    1.40
  24   4   0   14.50    1.10
  26  -4   0    2.10    1.00
  26  -4   0    2.80    1.00
 -26  -4   0    3.80    1.10
  26  -4   0    2.80    0.90
  26  -4   0    2.60    0.50
 -26  -4   0    2.60    0.90
  26  -4   0    4.20    1.10
  26  -4   0    2.90    0.60
  26   4   0    3.00    0.70
  26   4   0    2.10    0.90
 -26   4   0    2.10    1.10
  26   4   0    2.90    0.70
  26   4   0    3.40    0.70
 -26   4   0    1.20    0.90
  26   4   0    2.50    1.00
  26   4   0    2.60    0.80
  28  -4   0    0.90    0.50
 -28  -4   0   -1.20    0.80
  28  -4   0    1.30    1.00
  28  -4   0    0.00    0.90
 -28  -4   0   -1.30    0.80
  28  -4   0   -0.20    0.70
  28  -4   0    0.60    0.50
  28   4   0    0.10    0.60
  28   4   0    0.90    0.90
 -28   4   0    0.60    1.00
  28   4   0    0.00    0.50
  28   4   0    0.20    0.90
  28   4   0    1.20    0.60
 -28   4   0   -0.60    0.90
  30  -4   0    1.40    0.60
  30  -4   0    0.30    1.00
  30  -4   0    1.30    0.50
  30  -4   0    2.80    1.10
 -30  -4   0    0.30    0.90
 -30  -4   0    1.40    1.00
  30  -4   0    2.60    1.10
 -30   4   0    2.70    1.10
  30   4   0    2.80    1.20
  30   4   0    2.90    0.80
  30   4   0    1.80    0.70
  30   4   0    1.50    0.50
  30   4   0    1.50    0.90
 -30   4   0   -0.40    1.00
  32  -4   0   -1.00    0.60
  32  -4   0   -0.40    0.90
  32  -4   0    1.50    1.10
 -32  -4   0    1.60    1.10
  32  -4   0    1.10    1.20
 -32  -4   0   -0.50    1.00
  32  -4   0    0.10    0.60
  32   4   0    0.20    0.80
  32   4   0    0.50    0.70
 -32   4   0    1.20    1.20
  32   4   0    2.00    1.30
  32   4   0    0.50    0.40
  32   4   0    1.50    1.10
 -32   4   0    0.80    1.10
   1  -5   0   52.49    2.30
  -1  -5   0   53.09    2.30
  -1  -5   0   53.99    2.30
  -1  -5   0   56.59    2.20
  -1  -5   0   56.69    2.30
   1  -5   0   52.29    2.30
   1  -5   0   54.89    2.10
  -1  -5   0   55.09    2.30
   1  -5   0   52.29    2.20
  -1  -5   0   55.99    2.20
   1  -5   0   57.49    2.30
   1  -5   0   59.09    2.30
   1  -5   0   56.69    2.30
   1   5   0   52.69    2.30
   1   5   0   56.49    2.30
  -1   5   0   57.39    2.30
  -1   5   0   52.39    2.30
  -1   5   0   54.59    2.20
   1   5   0   55.29    2.20
  -1   5   0   58.09    2.30
   1   5   0   56.49    2.30
   1   5   0   54.69    2.30
  -1   5   0   56.19    2.30
   3  -5   0    0.80    0.40
   3  -5   0    1.50    0.50
  -3  -5   0    0.40    0.40
  -3  -5   0    0.00    0.20
  -3  -5   0    0.10    0.30
   3  -5   0    1.00    0.30
   3  -5   0    1.30    0.40
   3  -5   0    1.40    0.50
   3  -5   0    0.30    0.50
  -3  -5   0    0.60    0.40
  -3  -5   0    1.30    0.40
  -3  -5   0    1.20    0.40
  -3  -5   0    0.00    0.40
   3  -5   0    0.80    0.40
   3   5   0    1.10    0.40
   3   5   0    0.50    0.40
   3   5   0    1.80    0.50
  -3   5   0    0.30    0.40
   3   5   0    0.80    0.40
   3   5   0    1.60    0.50
  -3   5   0    1.30    0.40
  -3   5   0    0.40    0.40
   5  -5   0  305.27   11.00
  -5  -5   0  323.57   10.80
   5  -5   0  306.87   10.80
   5  -5   0  307.37   10.80
   5  -5   0  307.07   10.60
   5  -5   0  310.67   11.00
  -5  -5   0  312.17   10.80
  -5  -5   0  290.57   10.70
  -5  -5   0  301.17   11.10
  -5  -5   0  307.57   11.00
  -5  -5   0  324.37   10.90
   5  -5   0  303.47   10.80
  -5  -5   0  303.87   10.90
   5  -5   0  304.97   11.10
   5   5   0  306.27   10.50
   5   5   0  301.17   11.00
  -5   5   0  312.37   10.80
   5   5   0  301.37   10.90
   5   5   0  310.17   10.90
   5   5   0  306.57   11.20
   5   5   0  303.67   10.90
  -5   5   0  318.07   11.10
  -7  -5   0   77.19    3.00
   7  -5   0   78.69    3.00
   7  -5   0   77.49    3.00
  -7  -5   0   77.19    2.80
   7  -5   0   72.59    2.90
  -7  -5   0   80.69    2.80
   7  -5   0   78.59    2.70
   7  -5   0   75.79    3.10
   7  -5   0   75.99    3.00
  -7  -5   0   79.99    3.00
   7  -5   0   73.19    3.10
  -7  -5   0   75.09    3.10
   7  -5   0   76.69    2.80
  -7  -5   0   79.59    3.10
   7  -5   0   72.19    3.00
  -7  -5   0   75.19    3.00
   7   5   0   73.89    2.90
   7   5   0   73.89    3.00
   7   5   0   75.29    3.10
   7   5   0   74.09    3.00
   7   5   0   69.19    3.00
   7   5   0   76.69    3.10
  -7   5   0   73.29    2.90
   9  -5   0   22.60    1.20
  -9  -5   0   25.90    1.40
   9  -5   0   24.70    1.30
   9  -5   0   24.60    1.40
  -9  -5   0   25.90    1.30
   9  -5   0   25.30    1.40
   9  -5   0   24.30    1.30
  -9  -5   0   26.10    1.10
   9  -5   0   24.40    1.20
   9  -5   0   23.10    1.20
  -9  -5   0   28.60    1.40
  -9  -5   0   25.60    1.10
   9   5   0   25.40    1.20
   9   5   0   24.40    1.40
   9   5   0   25.70    1.40
   9   5   0   27.70    1.40
   9   5   0   25.30    1.30
   9   5   0   23.70    1.40
  11  -5   0    4.10    0.50
  11  -5   0    4.70    0.70
 -11  -5   0    3.40    0.40
 -11  -5   0    2.60    0.60
 -11  -5   0    3.70    0.70
  11  -5   0    4.20    0.50
 -11  -5   0    3.70    0.50
  11  -5   0    4.20    0.50
 -11  -5   0    1.30    0.40
  11  -5   0    4.20    0.70
  11  -5   0    3.50    0.50
  11  -5   0    2.60    0.60
 -11  -5   0    3.30    0.60
  11   5   0    3.90    0.70
  11   5   0    2.90    0.60
  11   5   0    3.10    0.60
  11   5   0    2.60    0.60
  11   5   0    3.90    0.60
  13  -5   0    2.30    0.40
  13  -5   0    3.10    0.50
  13  -5   0    3.00    0.60
  13  -5   0    2.70    0.50
 -13  -5   0    2.90    0.60
  13  -5   0    4.50    0.50
 -13  -5   0    4.90    0.50
  13  -5   0    4.30    0.80
 -13  -5   0    4.80    0.50
  13  -5   0    4.10    0.50
  13  -5   0    2.80    0.60
  13  -5   0    4.50    0.50
 -13  -5   0    3.50    0.70
 -13  -5   0    4.90    0.80
  13   5   0    4.00    0.50
  13   5   0    4.60    0.50
  13   5   0    4.40    0.70
  13   5   0    4.30    0.70
  13   5   0    3.80    0.70
  13   5   0    4.40    0.80
  13   5   0    3.00    0.60
  13   5   0    4.10    0.70
  15  -5   0    4.30    0.50
  15  -5   0    3.80    0.70
  15  -5   0    4.20    0.80
 -15  -5   0    3.60    0.50
  15  -5   0    3.80    0.50
 -15  -5   0    3.50    0.80
 -15  -5   0    4.20    0.50
  15  -5   0    3.80    0.50
  15  -5   0    1.80    0.40
 -15  -5   0    5.10    0.80
  15  -5   0    3.90    0.50
  15  -5   0    3.10    0.70
  15  -5   0    4.10    0.50
  15   5   0    3.70    0.70
  15   5   0    3.80    0.40
  15   5   0    2.80    0.70
  15   5   0    3.80    0.70
  15   5   0    3.50    0.70
  15   5   0    3.60    0.70
  15   5   0    4.20    0.50
  15   5   0    3.60    0.60
  17  -5   0   20.60    1.20
 -17  -5   0   21.00    1.40
  17  -5   0   21.70    1.20
  17  -5   0   22.80    1.10
 -17  -5   0   22.80    1.10
 -17  -5   0   23.40    1.20
 -17  -5   0   21.10    1.50
  17  -5   0   19.70    1.50
  17  -5   0   23.20    1.20
  17  -5   0   22.30    1.50
  17  -5   0   24.30    1.40
  17  -5   0   20.70    1.00
  17  -5   0   21.00    1.20
  17  -5   0   19.10    1.40
 -17  -5   0   18.60    1.60
  17   5   0   21.30    0.90
  17   5   0   22.80    0.90
 -17   5   0   22.10    1.60
  17   5   0   20.20    1.50
  17   5   0   22.80    1.40
  17   5   0   23.00    1.50
  17   5   0   20.20    1.40
  17   5   0   20.00    1.30
  19  -5   0   70.29    2.50
  19  -5   0   65.49    3.00
 -19  -5   0   66.69    3.10
 -19  -5   0   63.69    3.10
  19  -5   0   71.59    2.70
  19  -5   0   64.09    3.10
  19  -5   0   68.69    2.90
  19  -5   0   64.39    2.50
 -19  -5   0   66.69    2.80
 -19  -5   0   69.29    2.70
 -19  -5   0   66.59    3.00
  19  -5   0   68.69    3.20
  19  -5   0   63.79    2.70
  19   5   0   61.09    2.80
  19   5   0   65.89    2.90
  19   5   0   64.39    3.20
  19   5   0   65.39    2.90
 -19   5   0   64.49    3.00
  19   5   0   66.09    3.10
  21  -5   0   42.70    2.30
  21  -5   0   43.10    1.90
 -21  -5   0   37.10    2.20
  21  -5   0   43.00    1.60
  21  -5   0   41.30    2.30
  21  -5   0   39.00    2.30
 -21  -5   0   40.70    2.30
  21  -5   0   38.10    1.60
  21  -5   0   42.90    1.90
  21  -5   0   40.40    2.10
 -21  -5   0   40.30    2.40
  21   5   0   40.70    2.10
 -21   5   0   37.90    2.20
  21   5   0   43.50    2.10
  21   5   0   42.60    2.40
  21   5   0   38.80    2.00
  21   5   0   40.40    2.00
  21   5   0   42.40    2.30
 -23  -5   0   -0.10    0.70
  23  -5   0    1.00    0.80
  23  -5   0    0.20    0.50
  23  -5   0   -0.20    0.70
  23  -5   0   -0.80    0.80
 -23  -5   0    0.20    0.80
  23  -5   0    0.80    0.50
  23  -5   0    0.50    0.70
 -23  -5   0    0.30    0.80
  23   5   0    0.10    0.70
  23   5   0   -0.10    0.50
  23   5   0    0.40    0.60
  23   5   0    0.90    0.80
  23   5   0    0.50    0.90
 -23   5   0    0.10    0.90
  23   5   0   -0.60    0.60
 -23   5   0    0.40    0.80
  25  -5   0   32.90    1.60
 -25  -5   0   27.00    2.00
 -25  -5   0   32.60    2.30
  25  -5   0   27.70    1.50
  25  -5   0   31.90    2.30
  25  -5   0   29.30    2.00
  25  -5   0   33.50    2.10
  25  -5   0   30.40    2.00
 -25  -5   0   30.70    2.10
 -25   5   0   28.10    2.20
  25   5   0   31.00    2.10
  25   5   0   32.70    1.80
  25   5   0   28.90    1.70
  25   5   0   33.00    2.30
 -25   5   0   30.50    2.10
  25   5   0   32.40    1.90
  25   5   0   33.10    1.80
  27  -5   0    4.50    1.10
  27  -5   0    3.60    1.10
 -27  -5   0    3.00    1.20
  27  -5   0    3.50    1.10
  27  -5   0    5.10    1.40
  27  -5   0    3.80    0.70
 -27  -5   0    2.80    1.00
  27  -5   0    4.00    0.70
 -27  -5   0    4.50    1.20
 -27   5   0    5.70    1.30
  27   5   0    4.70    1.20
  27   5   0    2.50    0.80
 -27   5   0    3.00    1.00
  27   5   0    3.40    0.80
  27   5   0    3.20    1.00
  27   5   0    3.90    0.80
  27   5   0    3.40    0.90
  29  -5   0    0.40    0.90
 -29  -5   0    0.10    1.10
 -29  -5   0   -1.50    0.80
  29  -5   0    1.80    0.90
  29  -5   0   -1.00    0.50
  29  -5   0   -0.20    0.50
  29  -5   0    0.70    0.90
 -29  -5   0    0.70    1.10
  29   5   0    0.70    1.00
  29   5   0   -0.60    0.60
  29   5   0    0.30    0.70
 -29   5   0   -0.40    0.90
  29   5   0    1.00    0.90
 -29   5   0   -0.10    0.90
  29   5   0   -0.30    0.60
  31  -5   0    1.20    1.00
 -31  -5   0   -0.10    1.20
  31  -5   0    1.00    0.60
  31  -5   0    0.10    0.90
  31  -5   0    0.70    0.60
  31  -5   0    1.10    0.90
 -31  -5   0    1.40    1.10
 -31  -5   0    1.50    1.20
  31   5   0    0.80    1.00
  31   5   0    0.50    1.10
  31   5   0    0.60    0.80
  31   5   0    2.20    0.70
  31   5   0    1.10    0.80
 -31   5   0   -0.30    0.90
 -31   5   0    1.70    1.00
   0  -6   0  204.68    7.20
   0  -6   0  187.88    7.20
   0  -6   0  201.08    7.30
   0  -6   0  197.78    7.20
   0  -6   0  188.08    7.30
   0  -6   0  190.28    7.40
   0   6   0  197.58    7.20
   0   6   0  204.48    7.40
   0   6   0  209.38    7.20
   0   6   0  202.18    7.00
   0   6   0  207.88    7.30
   2  -6   0   83.19    3.20
  -2  -6   0   81.39    3.20
  -2  -6   0   78.39    3.20
   2  -6   0   79.69    3.20
  -2  -6   0   79.89    3.20
   2  -6   0   83.59    3.30
   2  -6   0   77.69    3.20
  -2  -6   0   77.99    3.20
   2  -6   0   77.69    3.20
  -2  -6   0   78.99    3.10
   2  -6   0   75.19    3.20
   2  -6   0   72.79    3.00
  -2   6   0   85.09    3.20
  -2   6   0   83.69    3.20
  -2   6   0   84.39    3.10
   2   6   0   78.39    3.20
  -2   6   0   80.49    3.20
  -2   6   0   82.29    3.10
   2   6   0   81.89    3.20
   2   6   0   78.89    3.20
   2   6   0   77.19    3.10
   2   6   0   79.89    3.30
  -4  -6   0  376.86   12.90
  -4  -6   0  383.26   13.20
  -4  -6   0  370.56   13.10
   4  -6   0  374.56   13.30
   4  -6   0  367.76   13.00
   4  -6   0  354.96   12.80
  -4  -6   0  389.66   13.00
   4  -6   0  356.86   13.10
   4  -6   0  369.66   13.20
  -4  -6   0  371.56   13.10
   4  -6   0  354.16   13.20
  -4  -6   0  359.76   13.00
   4  -6   0  374.16   13.10
  -4   6   0  388.96   12.70
  -4   6   0  374.16   13.30
   4   6   0  362.26   13.10
  -4   6   0  378.56   13.10
   4   6   0  373.66   13.10
   4   6   0  364.76   12.70
   4   6   0  367.16   13.50
   4   6   0  372.36   13.20
  -6  -6   0  100.59    3.80
  -6  -6   0   91.79    3.80
   6  -6   0   95.09    3.70
   6  -6   0   91.89    3.70
  -6  -6   0   95.39    3.70
  -6  -6   0   95.59    3.70
   6  -6   0   94.49    3.80
   6  -6   0   93.89    3.80
  -6  -6   0   97.59    3.60
   6  -6   0   90.49    3.70
  -6  -6   0   92.89    3.70
   6  -6   0   87.69    3.70
  -6  -6   0   96.39    3.80
   6   6   0   99.89    3.80
   6   6   0   97.29    3.80
  -6   6   0   96.99    3.70
   6   6   0   97.79    3.90
   6   6   0   94.49    3.70
  -6   6   0   95.59    3.70
   6   6   0   96.19    3.60
  -6   6   0  102.19    3.60
   6   6   0   92.99    3.70
  -8  -6   0   14.60    1.10
   8  -6   0   13.20    1.00
   8  -6   0   15.70    1.10
  -8  -6   0   17.30    1.20
   8  -6   0   16.60    1.00
  -8  -6   0   16.80    1.10
   8  -6   0   15.40    1.10
  -8  -6   0   16.90    1.10
  -8  -6   0   14.70    1.00
   8  -6   0   15.50    0.80
   8  -6   0   16.30    1.10
  -8  -6   0   14.00    1.00
   8  -6   0   14.60    1.00
   8  -6   0   13.10    1.20
  -8  -6   0   16.50    0.90
   8   6   0   14.90    1.10
   8   6   0   14.20    1.20
  -8   6   0   15.40    1.00
   8   6   0   14.10    1.10
   8   6   0   14.60    1.10
   8   6   0   14.50    1.10
   8   6   0   15.10    1.00
  10  -6   0   19.90    1.20
  10  -6   0   22.00    1.40
 -10  -6   0   21.20    1.00
  10  -6   0   22.40    1.20
  10  -6   0   19.70    1.30
  10  -6   0   22.60    1.20
 -10  -6   0   20.60    1.00
 -10  -6   0   19.30    1.30
  10  -6   0   23.30    1.10
 -10  -6   0   22.80    1.40
  10  -6   0   22.60    1.20
 -10  -6   0   20.80    1.40
  10  -6   0   19.70    1.40
 -10   6   0   21.70    1.10
  10   6   0   21.20    1.30
  10   6   0   20.40    1.30
  10   6   0   20.80    1.20
  10   6   0   18.30    1.30
  10   6   0   19.80    1.30
  10   6   0   20.00    1.30
 -12  -6   0    7.30    0.70
  12  -6   0    8.60    1.00
 -12  -6   0    6.60    0.80
 -12  -6   0    8.40    0.70
 -12  -6   0    8.20    1.00
  12  -6   0    8.80    0.80
  12  -6   0    9.30    0.80
 -12  -6   0    7.40    0.90
  12  -6   0    9.50    1.00
  12  -6   0    9.50    0.80
  12  -6   0    6.40    0.90
  12   6   0    7.10    0.90
  12   6   0    8.10    0.90
  12   6   0    7.60    0.90
  12   6   0    9.00    0.90
  12   6   0    8.00    0.90
 -14  -6   0    8.80    1.00
  14  -6   0    8.30    1.00
  14  -6   0    9.30    1.00
 -14  -6   0    7.70    1.00
  14  -6   0    9.70    0.90
 -14  -6   0    8.80    0.70
 -14  -6   0    8.30    0.70
  14  -6   0    9.30    0.80
  14   6   0    9.60    0.90
  14   6   0    9.00    1.10
  14   6   0    5.10    0.60
  14   6   0    8.70    0.90
  14   6   0    8.00    0.90
  14   6   0    7.30    0.90
 -16  -6   0    5.00    0.80
 -16  -6   0    6.80    0.90
  16  -6   0    4.70    0.70
 -16  -6   0    3.70    0.90
  16  -6   0    6.50    0.70
  16  -6   0    4.80    0.80
 -16  -6   0    4.40    0.60
 -16  -6   0    5.80    0.60
  16  -6   0    5.20    0.90
  16  -6   0    5.60    0.60
  16  -6   0    4.10    0.80
  16  -6   0    4.80    0.60
  16  -6   0    5.70    0.70
  16   6   0    3.70    0.90
  16   6   0    5.50    0.80
  16   6   0    6.50    0.80
  16   6   0    4.60    0.80
  16   6   0    6.10    0.60
  16   6   0    5.70    1.00
  18  -6   0   12.20    1.00
  18  -6   0   10.20    1.30
  18  -6   0   11.30    0.80
  18  -6   0   10.20    1.10
  18  -6   0   12.40    0.90
  18  -6   0   11.00    1.00
 -18  -6   0   11.20    1.30
  18  -6   0   10.70    0.90
 -18  -6   0   11.20    1.20
 -18  -6   0   10.10    1.20
  18  -6   0   11.10    1.20
  18   6   0    9.20    1.30
  18   6   0   12.60    1.30
  18   6   0   10.90    1.10
  18   6   0   12.70    1.20
  18   6   0   12.00    1.10
  18   6   0   12.10    0.70
 -18   6   0   10.00    1.20
  18   6   0   11.30    0.70
  20  -6   0    3.30    0.90
 -20  -6   0    4.50    0.90
  20  -6   0    3.60    0.80
 -20  -6   0    4.90    1.10
  20  -6   0    4.90    1.10
  20  -6   0    4.30    0.70
  20  -6   0    3.90    0.80
  20  -6   0    5.00    0.60
 -20  -6   0    4.50    1.00
  20  -6   0    2.90    0.50
  20  -6   0    2.90    0.60
  20   6   0    4.10    0.90
  20   6   0    2.40    0.80
  20   6   0    3.80    0.80
  20   6   0    4.50    1.00
  20   6   0    3.40    1.00
 -20   6   0    2.10    0.90
  22  -6   0    7.70    0.80
  22  -6   0   10.30    1.20
  22  -6   0    8.00    0.60
  22  -6   0    8.60    1.30
 -22  -6   0   10.80    1.30
 -22  -6   0    8.90    1.30
  22  -6   0    7.90    0.60
  22  -6   0    6.20    1.10
 -22  -6   0    9.40    1.30
  22  -6   0    9.50    0.70
  22  -6   0    8.50    0.90
  22  -6   0    9.30    1.20
  22   6   0    7.10    1.00
 -22   6   0    7.00    1.30
  22   6   0    8.10    1.00
  22   6   0    9.20    1.30
  22   6   0    9.30    1.30
  22   6   0    8.40    1.10
  24  -6   0   29.10    1.90
  24  -6   0   26.80    2.00
 -24  -6   0   21.80    1.90
 -24  -6   0   25.40    2.00
  24  -6   0   27.00    1.50
  24  -6   0   27.40    1.90
 -24  -6   0   24.50    1.90
  24  -6   0   26.80    2.10
  24  -6   0   23.40    1.50
  24   6   0   28.20    1.80
 -24   6   0   24.60    1.90
  24   6   0   25.20    1.60
  24   6   0   23.90    1.70
  24   6   0   25.60    1.80
  24   6   0   24.70    2.10
 -24   6   0   26.60    1.90
  24   6   0   25.30    2.00
 -26  -6   0   10.80    1.50
 -26  -6   0    9.50    1.40
  26  -6   0    9.80    1.00
  26  -6   0    9.50    1.30
  26  -6   0    9.30    1.40
 -26  -6   0    9.70    1.40
  26  -6   0   10.50    1.50
  26  -6   0    9.30    1.40
  26  -6   0   10.20    0.90
  26   6   0    9.50    1.20
 -26   6   0    8.30    1.30
  26   6   0    9.30    1.00
  26   6   0   11.30    1.30
  26   6   0    8.70    1.20
 -26   6   0    7.70    1.30
  26   6   0   10.70    1.40
  26   6   0   10.60    1.60
  28  -6   0    4.80    0.80
  28  -6   0    7.40    1.20
  28  -6   0    6.90    0.90
  28  -6   0    5.40    1.20
 -28  -6   0    7.10    1.50
  28  -6   0    4.30    1.30
  28  -6   0    6.90    1.30
 -28  -6   0    6.00    1.40
 -28  -6   0    5.70    1.30
  28   6   0    4.50    1.30
  28   6   0    6.00    1.10
  28   6   0    5.90    1.10
 -28   6   0    4.80    1.20
  28   6   0    6.10    1.20
  28   6   0    5.60    1.10
  28   6   0    6.90    1.00
 -28   6   0    4.10    1.20
 -30  -6   0    9.50    1.70
  30  -6   0   11.10    1.50
  30  -6   0    9.30    1.00
 -30  -6   0    9.40    1.50
  30  -6   0    8.80    1.40
  30  -6   0   10.50    1.70
 -30  -6   0    9.80    1.60
  30  -6   0    9.20    1.00
 -30   6   0   10.90    1.50
  30   6   0    7.60    1.20
  30   6   0   10.00    1.10
  30   6   0   11.40    1.70
 -30   6   0    6.20    1.30
  30   6   0    8.70    1.20
  30   6   0   11.90    1.70
   1  -7   0    5.50    0.70
  -1  -7   0    5.80    0.70
   1  -7   0    5.40    0.80
   1  -7   0    6.50    0.80
   1  -7   0    5.90    0.70
  -1  -7   0    5.20    0.80
  -1  -7   0    5.90    0.70
   1  -7   0    5.00    0.60
  -1  -7   0    6.10    0.90
  -1  -7   0    5.80    0.70
   1  -7   0    4.80    0.70
  -1  -7   0    5.40    0.80
   1  -7   0    7.50    0.80
  -1   7   0    8.10    0.80
   1   7   0    5.30    0.70
   1   7   0    6.20    0.80
   1   7   0    4.80    0.70
  -1   7   0    4.90    0.70
  -1   7   0    5.90    0.70
  -1   7   0    5.50    0.70
   1   7   0    5.10    0.70
  -1   7   0    6.00    0.70
   1   7   0    7.30    0.80
  -3  -7   0   33.30    1.60
   3  -7   0   33.30    1.80
  -3  -7   0   31.30    1.70
   3  -7   0   36.30    1.80
   3  -7   0   34.60    1.70
   3  -7   0   32.90    1.70
   3  -7   0   32.00    1.70
  -3  -7   0   33.20    1.80
  -3  -7   0   31.50    1.70
   3  -7   0   34.10    1.70
  -3  -7   0   31.70    1.70
  -3  -7   0   32.00    1.60
  -3   7   0   33.70    1.60
  -3   7   0   34.10    1.70
  -3   7   0   35.80    1.60
   3   7   0   31.00    1.60
  -3   7   0   33.60    1.70
   3   7   0   34.30    1.70
  -3   7   0   34.40    1.70
   3   7   0   35.60    1.80
   3   7   0   32.80    1.70
   3   7   0   33.30    1.70
   5  -7   0   57.09    2.50
  -5  -7   0   52.89    2.40
   5  -7   0   55.29    2.40
  -5  -7   0   57.19    2.40
   5  -7   0   53.09    2.40
  -5  -7   0   55.99    2.40
   5  -7   0   52.39    2.40
  -5  -7   0   56.79    2.30
   5  -7   0   53.69    2.50
  -5  -7   0   54.09    2.40
  -5  -7   0   43.40    2.40
   5  -7   0   53.59    2.40
  -5  -7   0   55.59    2.50
  -5   7   0   56.39    2.40
   5   7   0   54.09    2.40
  -5   7   0   57.99    2.30
   5   7   0   54.29    2.50
   5   7   0   56.99    2.50
  -5   7   0   54.69    2.40
   5   7   0   53.19    2.50
   5   7   0   55.79    2.30
   7  -7   0    0.50    0.50
   7  -7   0    1.20    0.70
   7  -7   0   -0.10    0.50
   7  -7   0    0.40    0.40
  -7  -7   0    0.10    0.50
   7  -7   0    0.10    0.50
  -7  -7   0    0.30    0.40
  -7  -7   0    0.30    0.50
   7  -7   0   -0.10    0.50
   7  -7   0    0.90    0.40
  -7  -7   0    0.40    0.50
  -7  -7   0   -0.20    0.50
  -7  -7   0    0.70    0.50
   7  -7   0    1.20    0.60
  -7  -7   0    0.90    0.50
   7   7   0    0.80    0.60
  -7   7   0   -0.10    0.50
   7   7   0    1.70    0.60
   7   7   0   -0.30    0.50
   7   7   0   -0.10    0.60
  -7   7   0    1.10    0.50
  -7   7   0    0.90    0.50
   7   7   0   -0.30    0.60
   9  -7   0    3.90    0.70
  -9  -7   0    3.40    0.70
  -9  -7   0    5.80    0.90
   9  -7   0    5.50    0.60
  -9  -7   0    5.00    0.80
   9  -7   0    6.00    0.80
   9  -7   0    6.00    0.90
   9  -7   0    6.00    0.90
   9  -7   0    5.00    0.70
  -9  -7   0    7.40    0.90
  -9  -7   0    5.50    0.80
   9  -7   0    5.40    0.50
  -9  -7   0    6.50    0.60
   9  -7   0    5.70    0.80
   9  -7   0    5.30    0.70
   9   7   0    4.90    0.80
  -9   7   0    5.80    0.70
   9   7   0    5.80    0.80
   9   7   0    5.40    0.70
   9   7   0    4.60    0.80
   9   7   0    5.20    0.90
   9   7   0    6.00    0.90
  11  -7   0   11.20    1.10
  11  -7   0   12.10    1.00
 -11  -7   0   12.70    0.80
  11  -7   0   13.50    1.10
 -11  -7   0   13.20    1.10
  11  -7   0   10.40    1.00
  11  -7   0   12.70    1.00
  11  -7   0   12.40    1.20
 -11  -7   0   13.50    1.20
  11  -7   0   12.10    0.90
 -11  -7   0   13.10    1.20
  11  -7   0   11.80    1.20
 -11   7   0   11.70    0.90
  11   7   0   11.60    1.10
  11   7   0   11.40    1.10
  11   7   0   10.70    1.10
  11   7   0   12.20    1.10
  11   7   0   13.20    1.00
  13  -7   0    2.80    0.70
 -13  -7   0    3.90    0.50
  13  -7   0    3.40    0.60
  13  -7   0    2.50    0.70
  13  -7   0    3.00    0.60
  13  -7   0    2.30    0.80
 -13  -7   0    3.40    0.80
  13  -7   0    2.60    0.70
 -13  -7   0    0.60    0.40
  13  -7   0    3.60    0.70
 -13  -7   0    3.60    0.80
 -13  -7   0    2.50    0.50
  13   7   0    3.10    0.80
  13   7   0    2.60    0.50
  13   7   0    3.30    0.80
  13   7   0    3.30    0.80
 -13   7   0    3.30    0.50
  13   7   0    2.00    0.70
  15  -7   0    0.70    0.40
  15  -7   0   -0.70    0.50
 -15  -7   0   -0.10    0.60
  15  -7   0   -0.40    0.50
  15  -7   0    0.50    0.80
  15  -7   0    0.50    0.60
  15  -7   0    0.30    0.50
 -15  -7   0   -0.90    0.70
  15  -7   0    0.60    0.70
 -15  -7   0   -0.40    0.50
  15   7   0   -0.30    0.40
  15   7   0   -0.50    0.60
  15   7   0   -0.20    0.60
  15   7   0    0.60    0.60
  15   7   0    0.10    0.60
  15   7   0    0.20    0.60
  15   7   0    0.70    0.70
 -17  -7   0   21.40    1.70
  17  -7   0   18.90    1.20
 -17  -7   0   18.80    1.50
  17  -7   0   16.40    1.50
  17  -7   0   18.10    1.40
  17  -7   0   19.20    1.50
  17  -7   0   20.80    1.30
  17  -7   0   20.90    1.20
 -17  -7   0   21.60    1.70
  17  -7   0   21.40    1.30
  17   7   0   19.40    1.50
  17   7   0   19.40    1.10
  17   7   0   17.20    1.50
  17   7   0   19.60    1.50
  17   7   0   19.30    1.50
  17   7   0   22.60    1.50
  17   7   0   16.50    1.60
  19  -7   0    0.90    0.80
  19  -7   0    0.60    0.60
  19  -7   0    0.80    0.80
  19  -7   0    0.50    0.70
 -19  -7   0    0.60    0.70
 -19  -7   0    0.30    0.90
  19  -7   0   -0.70    0.50
  19  -7   0    0.40    0.50
  19  -7   0    0.50    0.80
 -19  -7   0   -0.20    0.90
  19   7   0    0.20    0.80
  19   7   0   -1.10    0.70
 -19   7   0   -1.20    0.70
  19   7   0    1.40    0.80
  19   7   0    0.30    0.40
  19   7   0    0.40    0.70
  19   7   0    0.90    0.80
  19   7   0   -1.70    0.70
 -21  -7   0    1.30    0.80
  21  -7   0    0.90    0.70
  21  -7   0    0.30    0.60
 -21  -7   0   -0.40    0.70
  21  -7   0    0.60    0.90
  21  -7   0    0.80    0.70
  21  -7   0    1.00    0.50
 -21  -7   0    0.60    0.80
  21  -7   0    0.70    0.60
  21  -7   0    0.60    0.90
  21   7   0    0.10    0.70
 -21   7   0    0.60    0.90
  21   7   0    1.20    0.80
  21   7   0   -0.40    0.80
  21   7   0    2.60    1.10
  21   7   0    0.30    0.70
  21   7   0   -0.50    0.80
  23  -7   0   19.70    1.00
 -23  -7   0   18.80    1.90
 -23  -7   0   21.80    2.00
  23  -7   0   18.40    1.80
  23  -7   0   16.40    1.30
  23  -7   0   19.00    1.80
  23  -7   0   20.00    1.80
  23  -7   0   19.10    1.50
 -23  -7   0   19.20    1.80
  23  -7   0   19.50    1.40
  23   7   0   21.40    1.70
  23   7   0   19.10    1.50
  23   7   0   19.10    1.90
  23   7   0   20.80    1.60
  23   7   0   19.40    1.90
  23   7   0   17.80    1.50
 -23   7   0   18.50    1.70
 -25  -7   0   20.90    2.00
  25  -7   0   23.00    1.70
 -25  -7   0   19.50    1.90
 -25  -7   0   21.10    2.00
  25  -7   0   17.20    1.90
  25  -7   0   21.70    2.00
  25  -7   0   18.40    1.40
  25  -7   0   20.30    1.80
  25  -7   0   20.90    1.50
  25   7   0   21.70    1.80
  25   7   0   20.50    1.70
  25   7   0   23.70    1.80
  25   7   0   21.00    1.80
  25   7   0   20.00    1.90
 -25   7   0   20.90    1.90
  25   7   0   21.20    2.00
 -25   7   0   21.60    1.90
  25   7   0   22.40    1.60
  27  -7   0    1.80    0.90
 -27  -7   0   -1.10    0.90
  27  -7   0    0.00    0.90
  27  -7   0   -1.10    1.10
 -27  -7   0   -0.80    1.10
  27  -7   0    0.20    0.70
 -27  -7   0    0.60    1.10
  27  -7   0   -0.70    0.60
  27   7   0    0.10    0.70
  27   7   0    1.60    1.20
  27   7   0   -0.60    0.80
 -27   7   0   -1.60    0.90
 -27   7   0   -0.50    1.00
  27   7   0    1.20    0.90
  27   7   0   -1.60    0.70
  27   7   0    0.00    0.90
  27   7   0   -1.40    1.00
 -29  -7   0    7.30    1.50
  29  -7   0    9.20    1.70
  29  -7   0   11.20    1.20
 -29  -7   0   13.70    1.90
  29  -7   0   10.90    1.70
  29  -7   0   12.20    1.20
  29  -7   0    8.60    1.40
 -29  -7   0    9.50    1.60
 -29   7   0   10.30    1.60
  29   7   0   12.90    1.80
  29   7   0   12.90    1.30
 -29   7   0   10.70    1.60
  29   7   0   10.40    1.50
  29   7   0   11.60    1.70
  29   7   0   12.90    1.40
  29   7   0   14.10    1.60
  29   7   0   11.20    1.40
   0  -8   0   35.70    1.90
   0  -8   0   36.80    1.80
   0  -8   0   35.60    1.90
   0  -8   0   38.30    1.70
   0  -8   0   33.80    1.90
   0  -8   0   36.50    1.90
   0   8   0   34.90    1.80
   0   8   0   33.60    1.80
   0   8   0   37.60    1.90
   0   8   0   34.30    1.80
   0   8   0   34.60    1.90
   2  -8   0   31.00    1.60
   2  -8   0   29.30    1.50
  -2  -8   0   30.70    1.50
  -2  -8   0   28.30    1.60
  -2  -8   0   29.20    1.50
   2  -8   0   31.90    1.80
  -2  -8   0   28.50    1.70
  -2  -8   0   30.20    1.70
   2  -8   0   30.30    1.70
  -2  -8   0   31.50    1.70
   2  -8   0   31.50    1.70
   2  -8   0   32.90    1.70
   2   8   0   26.30    1.60
  -2   8   0   31.30    1.60
   2   8   0   31.30    1.70
  -2   8   0   30.40    1.60
   2   8   0   29.20    1.70
  -2   8   0   27.70    1.60
  -2   8   0   29.20    1.60
  -2   8   0   31.70    1.70
   2   8   0   32.60    1.80
   2   8   0   32.20    1.70
   4  -8   0    9.80    1.00
   4  -8   0    8.40    1.00
   4  -8   0    9.50    1.00
   4  -8   0    6.80    1.00
   4  -8   0   11.10    1.10
  -4  -8   0   11.70    1.10
  -4  -8   0    9.50    0.90
  -4  -8   0    8.60    0.90
  -4  -8   0   10.60    1.10
   4  -8   0   10.90    0.80
  -4  -8   0   10.50    1.10
   4  -8   0   10.20    1.00
  -4  -8   0   10.80    0.90
  -4   8   0    9.10    0.90
  -4   8   0    9.30    1.00
  -4   8   0   10.10    1.00
   4   8   0   10.70    1.00
   4   8   0   10.90    1.00
   4   8   0   10.10    1.00
   4   8   0    8.40    0.90
   4   8   0    9.80    1.00
  -6  -8   0    6.70    0.90
   6  -8   0    6.90    0.90
   6  -8   0    6.40    0.90
   6  -8   0    6.70    0.90
  -6  -8   0    6.10    0.70
  -6  -8   0    5.10    0.90
  -6  -8   0    7.10    0.90
   6  -8   0    5.40    0.90
   6  -8   0    6.60    0.70
   6  -8   0    6.90    0.90
  -6  -8   0    7.70    1.00
   6  -8   0    6.40    0.90
  -6  -8   0    7.60    0.90
   6   8   0    6.20    0.90
   6   8   0    5.70    0.90
   6   8   0    6.00    0.90
   6   8   0    7.30    0.90
   6   8   0    5.30    0.80
  -6   8   0    7.60    0.80
  -6   8   0    6.50    0.80
  -8  -8   0   22.80    1.60
   8  -8   0   22.60    1.20
  -8  -8   0   23.90    1.50
   8  -8   0   25.50    1.50
   8  -8   0   22.00    1.50
  -8  -8   0   23.40    1.40
   8  -8   0   23.30    1.60
  -8  -8   0   22.70    1.20
   8  -8   0   23.20    1.50
   8  -8   0   23.10    1.50
   8  -8   0   21.90    1.40
   8   8   0   22.00    1.50
   8   8   0   22.50    1.60
   8   8   0   24.30    1.40
   8   8   0   24.90    1.50
   8   8   0   19.60    1.50
  -8   8   0   20.50    1.30
  10  -8   0   55.59    2.60
 -10  -8   0   55.69    2.30
  10  -8   0   58.69    2.40
 -10  -8   0   54.29    2.60
  10  -8   0   56.69    2.60
 -10  -8   0   57.19    2.80
  10  -8   0   54.99    2.70
  10  -8   0   56.19    2.50
  10  -8   0   48.60    2.10
  10  -8   0   54.19    2.70
 -10  -8   0   56.99    2.60
  10  -8   0   57.09    2.60
  10   8   0   54.59    2.60
  10   8   0   54.99    2.80
  10   8   0   55.39    2.60
 -10   8   0   57.69    2.50
  10   8   0   56.79    2.50
  10   8   0   57.19    2.70
  12  -8   0   17.30    1.10
  12  -8   0   16.80    1.50
  12  -8   0   17.50    1.20
  12  -8   0   17.10    1.30
 -12  -8   0   19.00    1.50
  12  -8   0   17.80    1.40
 -12  -8   0   17.00    1.30
  12  -8   0   21.60    1.50
 -12  -8   0   20.30    1.50
  12  -8   0   17.60    1.30
  12   8   0   19.60    1.50
 -12   8   0   18.90    1.20
  12   8   0   16.00    1.30
  12   8   0   17.20    1.40
  12   8   0   16.90    1.40
  12   8   0   16.30    1.40
  12   8   0   15.20    1.40
  14  -8   0    0.60    0.80
  14  -8   0    0.40    0.60
  14  -8   0    0.20    0.50
  14  -8   0   -0.10    0.60
 -14  -8   0    0.20    0.70
 -14  -8   0    0.10    0.60
  14  -8   0    0.00    0.70
  14  -8   0    0.10    0.50
  14  -8   0    0.10    0.70
 -14  -8   0    0.60    0.80
  14   8   0   -0.30    0.50
  14   8   0   -0.10    0.70
  14   8   0    0.80    0.70
  14   8   0    0.00    0.70
  14   8   0    0.00    0.70
  14   8   0    0.10    0.70
  16  -8   0   10.40    0.90
  16  -8   0   10.10    1.30
  16  -8   0    7.20    1.00
  16  -8   0   10.40    1.00
 -16  -8   0   10.50    1.30
  16  -8   0   10.50    1.00
  16  -8   0    9.00    1.20
  16  -8   0    7.70    1.10
 -16  -8   0    8.40    1.20
 -16  -8   0    9.10    1.20
  16   8   0    8.50    1.10
  16   8   0    8.00    1.10
  16   8   0    8.30    1.30
  16   8   0    7.00    0.80
  16   8   0    6.90    1.10
  16   8   0    7.90    1.20
 -18  -8   0    3.70    1.00
  18  -8   0    3.50    0.80
  18  -8   0    3.30    0.70
 -18  -8   0    3.70    1.10
 -18  -8   0    4.30    1.10
  18  -8   0    5.10    0.90
  18  -8   0    4.10    1.10
  18  -8   0    3.60    1.00
  18  -8   0    4.70    0.80
  18  -8   0    4.30    1.10
  18   8   0    4.50    1.00
  18   8   0    3.00    1.00
  18   8   0    4.50    1.00
  18   8   0    2.00    1.00
  18   8   0    3.70    0.70
 -20  -8   0   20.00    1.80
  20  -8   0   18.70    1.40
  20  -8   0   16.80    1.40
  20  -8   0   19.80    1.90
  20  -8   0   17.70    1.70
 -20  -8   0   18.40    1.70
  20  -8   0   17.90    1.30
  20  -8   0   17.20    1.70
  20  -8   0   18.40    1.20
 -20  -8   0   18.80    1.80
  20   8   0   18.30    1.80
  20   8   0   17.70    1.00
  20   8   0   18.50    1.60
  20   8   0   20.30    1.70
 -20   8   0   15.70    1.60
  20   8   0   17.40    1.60
  20   8   0   18.80    1.60
  22  -8   0   15.70    1.30
  22  -8   0   16.20    1.10
  22  -8   0   19.30    1.80
  22  -8   0   17.20    1.60
  22  -8   0   17.80    1.40
  22  -8   0   19.00    1.80
 -22  -8   0   16.00    1.70
 -22  -8   0   18.90    1.80
 -22  -8   0   18.50    1.80
  22   8   0   18.60    1.60
  22   8   0   20.20    1.70
 -22   8   0   19.10    1.80
  22   8   0   16.90    1.60
  22   8   0   18.60    1.70
  22   8   0   15.00    1.90
  24  -8   0   12.00    1.40
 -24  -8   0   11.80    1.70
  24  -8   0   11.40    0.90
  24  -8   0   13.40    1.70
  24  -8   0   14.20    1.60
 -24  -8   0   11.50    1.60
  24  -8   0   11.00    1.20
 -24  -8   0   10.90    1.50
  24  -8   0   12.20    1.20
  24   8   0   12.20    1.60
  24   8   0   13.60    1.50
 -24   8   0   13.50    1.70
  24   8   0   13.00    1.40
  24   8   0   12.90    1.40
  24   8   0   10.20    1.50
  24   8   0   11.00    1.40
 -26  -8   0   12.00    1.80
  26  -8   0   10.20    1.10
 -26  -8   0    8.90    1.70
  26  -8   0   10.40    1.20
 -26  -8   0    6.90    1.40
  26  -8   0    9.50    1.70
  26  -8   0    7.60    1.40
  26  -8   0   13.20    1.70
  26   8   0    8.90    1.40
  26   8   0    9.90    1.40
  26   8   0   10.50    1.70
  26   8   0   10.70    1.50
  26   8   0    9.90    1.30
  26   8   0   14.40    1.50
  26   8   0    6.90    1.40
 -26   8   0    9.20    1.60
 -26   8   0    8.70    1.50
 -28  -8   0    2.20    1.30
  28  -8   0    0.70    1.10
  28  -8   0    0.50    1.50
 -28  -8   0    2.10    1.20
  28  -8   0   -0.90    0.80
  28  -8   0    0.50    0.80
  28  -8   0    0.60    1.30
 -28  -8   0    2.70    1.40
  28   8   0    2.60    1.10
 -28   8   0    1.10    1.30
  28   8   0    2.50    1.10
  28   8   0   -0.30    1.10
  28   8   0    1.90    1.20
  28   8   0    2.50    1.10
  28   8   0    1.30    0.90
 -28   8   0    1.80    1.20
   1  -9   0    0.00    0.70
   1  -9   0    0.40    0.60
   1  -9   0   -0.50    0.60
   1  -9   0   -0.80    0.60
  -1  -9   0   -0.10    0.40
  -1  -9   0   -1.10    0.70
  -1  -9   0    0.30    0.60
  -1  -9   0   -0.90    0.60
  -1  -9   0    0.80    0.70
   1  -9   0    1.00    0.60
   1  -9   0    0.40    0.50
   1  -9   0    1.00    0.70
  -1  -9   0    0.20    0.70
  -1  -9   0    0.20    0.50
   1   9   0    0.30    0.70
  -1   9   0    0.40    0.70
   1   9   0    0.50    0.60
   1   9   0    1.40    0.70
   1   9   0    0.10    0.70
  -1   9   0   -0.20    0.60
   1   9   0    0.50    0.60
  -1   9   0    1.30    0.60
   3  -9   0   15.40    1.30
   3  -9   0   18.60    1.40
  -3  -9   0   17.10    1.50
  -3  -9   0   19.60    1.20
  -3  -9   0   14.60    1.20
   3  -9   0   18.10    1.50
   3  -9   0   18.30    1.40
   3  -9   0   14.50    1.30
  -3  -9   0   17.40    1.40
  -3  -9   0   17.80    1.50
   3  -9   0   17.50    1.40
   3  -9   0   16.10    1.10
  -3  -9   0   18.40    1.50
  -3   9   0   17.70    1.30
  -3   9   0   16.90    1.40
   3   9   0   19.20    1.40
   3   9   0   18.60    1.40
   3   9   0   18.50    1.50
   3   9   0   18.60    1.40
   3   9   0   17.40    1.30
   5  -9   0    2.10    0.80
  -5  -9   0    2.90    0.80
   5  -9   0    2.00    0.80
   5  -9   0    1.40    0.70
  -5  -9   0    1.70    0.70
   5  -9   0    2.90    0.50
  -5  -9   0    1.20    0.80
   5  -9   0    1.80    0.70
  -5  -9   0    2.00    0.70
   5  -9   0    2.30    0.80
   5  -9   0    1.90    0.70
  -5  -9   0    1.30    0.70
  -5  -9   0    1.60    0.80
  -5  -9   0    2.50    0.60
   5   9   0    1.10    0.80
   5   9   0    1.60    0.70
   5   9   0    2.40    0.90
   5   9   0    2.70    0.80
  -5   9   0    2.10    0.70
   5   9   0    2.90    0.70
  -5   9   0    2.90    0.80
   7  -9   0    3.50    0.80
   7  -9   0    3.40    0.90
   7  -9   0    4.10    1.00
   7  -9   0    3.40    0.60
  -7  -9   0    3.10    1.00
   7  -9   0    5.30    0.90
  -7  -9   0    2.90    0.80
   7  -9   0    3.40    0.80
  -7  -9   0    4.10    0.90
  -7  -9   0    2.30    0.70
  -7  -9   0    3.80    0.70
   7  -9   0    2.80    0.80
   7   9   0    3.80    1.00
   7   9   0    2.00    0.70
   7   9   0    2.20    0.80
   7   9   0    4.40    0.90
   7   9   0    4.50    0.80
  -7   9   0    2.60    0.70
  -9  -9   0  126.69    5.10
   9  -9   0  122.49    5.10
   9  -9   0  125.19    5.00
   9  -9   0  125.59    5.10
  -9  -9   0  122.59    5.20
  -9  -9   0  120.49    4.90
   9  -9   0  123.99    4.70
   9  -9   0  123.89    5.00
  -9  -9   0  130.29    4.80
   9  -9   0  127.79    5.30
   9  -9   0  126.59    5.10
  -9   9   0  126.49    5.00
   9   9   0  131.39    5.10
   9   9   0  126.29    5.30
   9   9   0  126.09    4.80
   9   9   0  126.49    5.10
   9   9   0  129.99    5.20
  11  -9   0   20.70    1.30
  11  -9   0   21.90    1.60
 -11  -9   0   19.60    1.70
  11  -9   0   22.20    1.60
  11  -9   0   18.00    1.50
  11  -9   0   22.60    1.60
  11  -9   0   19.10    1.60
  11  -9   0   19.90    1.50
 -11  -9   0   21.10    1.50
 -11  -9   0   19.70    1.50
  11   9   0   21.50    1.70
 -11   9   0   20.00    1.40
  11   9   0   19.70    1.60
  11   9   0   19.90    1.60
  11   9   0   21.00    1.70
  11   9   0   22.40    1.50
  13  -9   0   13.80    1.40
  13  -9   0   13.10    1.30
  13  -9   0   10.70    1.30
  13  -9   0   14.70    1.10
  13  -9   0   12.50    1.20
  13  -9   0   14.10    1.40
 -13  -9   0   13.40    1.40
 -13  -9   0   13.60    1.30
  13  -9   0   13.70    1.20
 -13  -9   0   10.60    1.30
  13   9   0   10.90    1.10
  13   9   0   12.30    1.40
  13   9   0   14.40    1.40
  13   9   0   12.20    1.40
  13   9   0   16.30    1.50
  15  -9   0    0.80    0.70
  15  -9   0    2.10    0.90
  15  -9   0    0.50    0.80
 -15  -9   0    1.60    1.00
  15  -9   0    2.30    0.70
 -15  -9   0    1.60    0.80
  15  -9   0    1.50    0.80
  15  -9   0    1.80    1.00
 -15  -9   0    2.30    0.80
  15  -9   0    1.40    0.70
  15   9   0    0.40    0.90
  15   9   0    0.40    0.80
  15   9   0    2.40    0.90
  15   9   0    1.80    0.90
  15   9   0    1.80    0.90
  15   9   0    0.60    0.60
 -17  -9   0    0.60    0.90
  17  -9   0    0.40    0.70
 -17  -9   0   -0.40    0.90
 -17  -9   0   -0.20    0.80
  17  -9   0    0.90    0.90
  17  -9   0    1.30    0.80
  17  -9   0    0.10    0.60
  17  -9   0    1.10    0.80
  17  -9   0    0.70    0.90
  17   9   0    1.10    0.90
  17   9   0    0.00    0.80
  17   9   0    0.90    0.90
  17   9   0   -0.10    0.80
  17   9   0    0.80    0.60
  17   9   0    0.70    0.90
 -19  -9   0    1.30    1.00
  19  -9   0    0.50    1.00
  19  -9   0    0.80    0.90
 -19  -9   0    0.70    0.80
 -19  -9   0    1.00    0.90
  19  -9   0    0.50    0.80
  19  -9   0    0.60    0.60
  19  -9   0    2.00    1.10
  19  -9   0    1.90    0.80
  19   9   0    0.30    0.90
  19   9   0   -0.40    0.90
  19   9   0    0.10    0.80
  19   9   0    0.70    0.60
  19   9   0    1.70    0.90
  19   9   0    2.20    0.90
 -19   9   0    0.60    0.90
  21  -9   0   -0.20    0.60
 -21  -9   0    0.60    1.10
  21  -9   0    0.30    1.00
  21  -9   0    0.50    0.70
  21  -9   0   -0.40    0.70
  21  -9   0   -0.50    0.80
 -21  -9   0    0.10    1.00
 -21  -9   0    0.20    0.80
  21  -9   0   -0.40    0.90
  21   9   0    0.90    0.50
 -21   9   0    0.70    0.90
  21   9   0    0.30    0.90
  21   9   0    1.00    0.90
  21   9   0    0.10    0.90
  21   9   0    0.70    1.20
  21   9   0    0.80    1.00
 -23  -9   0    4.30    1.20
  23  -9   0    4.40    0.70
  23  -9   0    3.40    0.90
  23  -9   0    2.30    1.10
  23  -9   0    8.10    1.50
  23  -9   0    3.30    1.10
 -23  -9   0    4.00    1.10
 -23  -9   0    4.40    1.20
  23  -9   0    1.90    0.80
 -23   9   0    3.80    1.10
  23   9   0    5.10    1.20
  23   9   0    2.20    1.00
  23   9   0    4.20    1.20
  23   9   0    6.30    1.30
  23   9   0    3.20    1.10
  25  -9   0    6.70    1.30
  25  -9   0    7.20    0.70
  25  -9   0    7.70    1.70
  25  -9   0    9.20    1.50
  25  -9   0    8.80    1.10
 -25  -9   0    8.70    1.50
  25  -9   0    9.10    1.10
 -25  -9   0    5.50    1.30
 -25  -9   0    9.60    1.50
  25   9   0    5.10    1.40
  25   9   0    7.30    1.40
  25   9   0    9.40    1.30
 -25   9   0    8.30    1.40
  25   9   0    7.50    1.40
  25   9   0    6.70    1.30
  27  -9   0   10.10    1.80
 -27  -9   0   10.70    1.80
  27  -9   0    8.40    1.50
  27  -9   0    9.40    1.70
  27  -9   0    7.00    1.10
 -27  -9   0    7.50    1.50
  27  -9   0    7.60    1.10
 -27  -9   0    9.40    1.70
  27   9   0    9.00    1.50
  27   9   0    9.90    1.50
  27   9   0    8.10    1.40
  27   9   0    9.60    1.60
 -27   9   0    8.90    1.70
 -27   9   0    6.10    1.50
  27   9   0    7.50    1.70
  27   9   0    7.00    1.30
   0 -10   0    8.70    1.20
   0 -10   0    5.70    1.00
   0 -10   0    6.20    1.10
   0 -10   0    5.20    0.90
   0 -10   0    8.30    1.10
   0 -10   0    6.20    1.00
   0 -10   0    7.20    0.80
   0  10   0    4.60    0.90
   0  10   0    6.30    1.10
   2 -10   0    1.90    0.80
  -2 -10   0    0.70    0.80
   2 -10   0    2.80    0.90
  -2 -10   0    1.50    0.70
   2 -10   0    1.40    0.80
   2 -10   0    1.30    0.90
  -2 -10   0    3.00    0.90
   2 -10   0    1.20    0.90
  -2 -10   0    1.20    0.90
   2 -10   0    1.70    0.80
   2 -10   0    0.80    0.50
  -2 -10   0    1.70    0.90
  -2 -10   0    1.60    0.80
  -2 -10   0    2.20    0.80
   2  10   0    1.80    0.80
  -2  10   0    2.00    0.80
   2  10   0    0.50    0.70
  -2  10   0    1.80    0.80
   2  10   0    0.90    0.80
  -4 -10   0   17.20    1.30
   4 -10   0   15.50    1.10
   4 -10   0   15.70    1.50
  -4 -10   0   17.40    1.50
  -4 -10   0   15.20    1.50
   4 -10   0   16.20    1.40
   4 -10   0   15.50    1.50
  -4 -10   0   15.80    1.50
  -4 -10   0   19.30    1.60
  -4 -10   0   14.80    1.20
  -4 -10   0   16.10    1.50
   4 -10   0   17.10    1.50
   4 -10   0   19.00    1.70
   4 -10   0   16.80    1.50
   4  10   0   17.80    1.40
   4  10   0   15.40    1.40
  -4  10   0   16.80    1.40
   4  10   0   16.50    1.60
   4  10   0   15.80    1.50
  -6 -10   0    0.80    0.70
   6 -10   0    1.50    0.90
   6 -10   0    0.50    0.50
   6 -10   0   -1.00    0.70
  -6 -10   0    0.00    0.80
   6 -10   0   -0.50    0.80
  -6 -10   0   -0.80    0.70
   6 -10   0   -0.10    0.80
  -6 -10   0   -0.40    0.60
  -6 -10   0    1.70    0.90
   6 -10   0    0.50    0.80
   6 -10   0   -0.60    0.80
   6  10   0    1.10    0.70
   6  10   0   -0.40    0.70
  -6  10   0   -0.60    0.70
   6  10   0    0.30    0.90
   6  10   0    0.80    0.80
   6  10   0   -0.70    0.70
   8 -10   0   -0.40    0.70
   8 -10   0    1.50    0.80
   8 -10   0    0.50    0.80
  -8 -10   0    0.20    0.70
   8 -10   0   -1.40    0.60
  -8 -10   0   -0.10    0.70
   8 -10   0   -0.10    0.50
   8 -10   0    0.80    0.80
   8 -10   0   -0.50    0.80
  -8 -10   0   -0.60    0.60
   8  10   0   -0.10    0.80
   8  10   0   -1.30    0.80
  -8  10   0    0.20    0.70
   8  10   0    0.70    0.70
   8  10   0    0.40    0.80
   8  10   0   -0.40    0.70
  10 -10   0   62.89    3.10
  10 -10   0   59.89    3.20
 -10 -10   0   65.89    3.30
 -10 -10   0   64.59    2.90
  10 -10   0   61.19    3.00
  10 -10   0   57.89    2.90
  10 -10   0   63.39    3.00
  10 -10   0   59.49    2.90
 -10 -10   0   59.39    3.00
 -10  10   0   64.09    2.90
  10  10   0   60.79    2.90
  10  10   0   63.79    3.10
  10  10   0   57.99    3.00
  10  10   0   60.79    3.10
  10  10   0   62.19    3.20
  12 -10   0   19.30    1.60
  12 -10   0   22.50    1.60
 -12 -10   0   23.60    1.70
  12 -10   0   23.70    1.70
  12 -10   0   18.70    1.70
  12 -10   0   21.20    1.70
 -12 -10   0   19.30    1.70
  12 -10   0   18.60    1.60
 -12 -10   0   16.10    1.70
  12  10   0   22.50    1.80
  12  10   0   22.30    1.80
  12  10   0   19.90    1.60
  12  10   0   22.20    1.90
  12  10   0   20.50    1.80
 -14 -10   0    4.00    1.00
  14 -10   0    3.40    0.90
  14 -10   0    3.00    1.10
  14 -10   0    3.00    0.80
 -14 -10   0    2.60    0.90
 -14 -10   0    4.00    1.10
  14 -10   0    2.70    1.20
  14 -10   0    2.40    0.90
  14 -10   0    4.10    1.00
  14  10   0    3.20    0.90
  14  10   0    2.10    1.00
  14  10   0    2.00    0.80
  14  10   0    2.10    1.00
  14  10   0    3.70    1.10
  16 -10   0    4.30    1.10
  16 -10   0    2.20    1.10
 -16 -10   0    4.80    1.30
  16 -10   0    5.80    0.90
  16 -10   0    5.40    1.00
  16 -10   0    5.80    1.10
 -16 -10   0    5.20    1.20
  16 -10   0    3.50    1.10
 -16 -10   0    5.00    1.10
  16  10   0    3.40    0.80
  16  10   0    3.00    1.10
  16  10   0    3.80    1.10
  16  10   0    5.40    1.10
  16  10   0    3.90    1.10
 -18 -10   0    0.50    0.90
  18 -10   0    0.50    0.90
  18 -10   0    0.50    0.60
  18 -10   0    1.20    0.90
  18 -10   0    0.60    0.80
  18 -10   0    0.90    0.90
 -18 -10   0    0.50    1.10
 -18 -10   0   -0.40    0.80
  18 -10   0    1.60    1.20
  18  10   0    0.80    0.70
  18  10   0   -0.40    1.00
  18  10   0   -0.20    0.90
  18  10   0    0.40    0.90
  18  10   0   -0.30    1.00
  20 -10   0    1.30    0.90
 -20 -10   0    1.60    1.20
 -20 -10   0   -1.50    0.90
  20 -10   0   -0.10    0.90
  20 -10   0    1.10    1.10
  20 -10   0    1.50    0.90
 -20 -10   0    1.40    1.00
  20 -10   0    1.70    0.70
  20 -10   0    1.60    0.90
  20  10   0    1.40    1.00
 -20  10   0    0.60    1.20
  20  10   0    0.60    1.00
  20  10   0    1.00    0.60
  20  10   0   -0.30    0.90
  20  10   0    2.70    1.10
 -22 -10   0    1.00    1.10
 -22 -10   0    0.40    1.00
 -22 -10   0    0.70    1.20
  22 -10   0    0.00    1.30
  22 -10   0    0.20    1.00
  22 -10   0    1.50    0.80
  22 -10   0   -0.20    0.80
  22 -10   0    1.40    1.00
  22 -10   0    0.80    0.60
  22  10   0    0.00    0.90
  22  10   0    2.90    1.30
  22  10   0    2.20    1.10
 -22  10   0    0.20    1.10
  22  10   0    0.00    1.10
  22  10   0    1.20    0.60
  22  10   0    0.50    1.10
 -24 -10   0    1.60    1.30
  24 -10   0   -0.10    1.10
  24 -10   0    1.30    0.80
  24 -10   0    1.90    0.70
 -24 -10   0    2.50    1.30
  24 -10   0    0.50    1.10
  24 -10   0    2.90    1.40
 -24 -10   0    1.00    1.30
  24 -10   0    1.80    0.90
  24  10   0   -1.00    1.30
 -24  10   0    2.90    1.20
  24  10   0    1.70    1.20
  24  10   0    1.60    1.10
  24  10   0    1.00    1.00
  24  10   0    1.60    1.10
   1 -11   0   45.20    2.40
  -1 -11   0   47.40    2.40
   1 -11   0   47.20    2.60
   1 -11   0   43.50    2.50
   1 -11   0   39.30    2.40
   1 -11   0   48.00    2.50
  -1 -11   0   49.50    2.60
   1 -11   0   47.20    2.20
  -1 -11   0   44.40    2.60
  -1 -11   0   44.70    2.50
  -1 -11   0   43.40    2.60
  -1 -11   0   48.50    2.60
  -1 -11   0   49.60    2.20
   1 -11   0   44.50    2.60
   1  11   0   46.30    2.50
  -1  11   0   44.90    2.40
  -1  11   0   44.40    2.50
   1  11   0   42.80    2.50
   3 -11   0    2.10    0.90
   3 -11   0    1.90    0.90
   3 -11   0    1.00    0.90
  -3 -11   0    0.70    1.00
  -3 -11   0    2.50    0.70
  -3 -11   0    0.30    0.90
  -3 -11   0    0.20    0.80
  -3 -11   0    1.10    0.80
   3 -11   0    0.90    0.80
   3 -11   0    2.40    1.00
   3 -11   0    1.60    0.70
   3 -11   0    4.00    1.10
  -3  11   0    1.60    0.90
   3  11   0    0.90    0.80
   3  11   0    0.50    0.80
   5 -11   0   13.90    1.50
   5 -11   0   11.90    1.40
  -5 -11   0   11.90    1.20
   5 -11   0   13.70    1.40
  -5 -11   0   13.00    1.50
   5 -11   0   12.40    1.40
  -5 -11   0   12.10    1.40
   5 -11   0   11.80    1.40
   5 -11   0   12.80    1.40
  -5 -11   0   11.00    1.50
  -5  11   0   12.90    1.30
   5  11   0   11.90    1.40
   5  11   0   11.30    1.40
   5  11   0   13.20    1.40
  -7 -11   0    0.90    0.80
   7 -11   0    0.20    0.80
  -7 -11   0    1.30    0.80
   7 -11   0    0.80    0.80
   7 -11   0    0.60    0.90
   7 -11   0    1.10    0.90
  -7 -11   0    1.10    0.70
   7 -11   0    1.70    1.10
   7 -11   0    0.70    0.90
  -7  11   0   -0.50    0.70
   7  11   0    0.30    0.80
   7  11   0    1.00    0.90
   7  11   0    0.40    0.80
   9 -11   0   20.10    1.70
   9 -11   0   21.30    1.80
   9 -11   0   19.30    1.70
   9 -11   0   19.30    1.90
  -9 -11   0   20.00    1.80
   9 -11   0   20.60    1.70
  -9 -11   0   22.20    1.90
  -9 -11   0   22.40    1.60
   9 -11   0   22.10    1.70
   9  11   0   20.70    1.90
   9  11   0   23.50    1.80
   9  11   0   21.30    1.80
   9  11   0   23.00    1.90
   9  11   0   20.40    1.90
 -11 -11   0    7.60    1.20
 -11 -11   0    6.60    1.20
  11 -11   0    7.10    1.20
  11 -11   0    7.30    1.20
  11 -11   0    7.80    1.40
  11 -11   0    6.60    1.20
  11 -11   0    6.00    1.10
 -11 -11   0    6.60    1.30
  11 -11   0    6.10    1.30
  11  11   0    8.30    1.40
  11  11   0    8.20    1.30
  11  11   0    7.80    1.20
  11  11   0    7.70    1.30
  11  11   0    7.30    1.10
  13 -11   0    3.60    1.00
  13 -11   0    5.10    1.30
 -13 -11   0    5.50    1.10
  13 -11   0    3.40    1.00
  13 -11   0    4.90    1.30
  13 -11   0    6.00    1.20
  13 -11   0    3.80    1.10
 -13 -11   0    5.70    1.20
 -13 -11   0    3.60    1.00
  13  11   0    3.90    1.20
  13  11   0    3.40    1.00
  13  11   0    3.60    1.10
  13  11   0    5.00    1.10
  13  11   0    4.20    1.20
  15 -11   0    2.00    0.90
  15 -11   0    1.10    1.00
 -15 -11   0    1.10    0.90
  15 -11   0    1.70    1.00
 -15 -11   0    3.60    0.90
  15 -11   0    0.90    0.90
 -15 -11   0    2.40    1.00
  15 -11   0    1.90    0.90
  15 -11   0    0.70    0.80
  15  11   0    2.50    1.10
  15  11   0    1.70    0.80
  15  11   0    2.00    1.10
  15  11   0    1.90    1.00
  15  11   0    2.40    1.10
 -17 -11   0   -1.00    0.90
  17 -11   0   -0.50    0.90
  17 -11   0   -0.40    0.90
  17 -11   0   -1.50    1.00
  17 -11   0   -0.50    0.70
  17 -11   0    0.40    1.00
  17 -11   0    1.40    0.90
 -17 -11   0    1.30    0.90
 -17 -11   0   -0.30    1.10
  17  11   0   -0.10    1.00
  17  11   0    0.00    1.00
  17  11   0   -0.40    0.70
  17  11   0   -0.60    1.00
  17  11   0    0.30    1.00
  19 -11   0   22.60    2.10
 -19 -11   0   21.80    2.10
  19 -11   0   23.40    1.60
 -19 -11   0   26.80    2.40
  19 -11   0   23.00    2.20
  19 -11   0   24.50    1.90
  19 -11   0   24.00    1.90
 -19 -11   0   24.70    2.00
  19 -11   0   25.20    2.30
  19  11   0   22.70    1.60
  19  11   0   21.50    2.10
  19  11   0   22.90    2.00
  19  11   0   25.80    2.20
  19  11   0   24.50    2.20
 -19  11   0   16.40    1.90
  21 -11   0    2.00    1.10
 -21 -11   0    5.10    1.40
  21 -11   0    2.20    0.80
 -21 -11   0    4.80    1.40
  21 -11   0    3.80    1.10
 -21 -11   0    5.90    1.30
  21 -11   0    5.80    1.50
  21 -11   0    2.70    1.00
  21 -11   0    2.70    1.30
  21  11   0    3.10    1.20
  21  11   0    4.00    1.30
  21  11   0    2.30    1.20
  21  11   0    2.80    1.20
 -21  11   0    4.00    1.40
  21  11   0    3.10    0.80
   0 -12   0    0.10    0.80
   0 -12   0   -0.20    0.80
   0 -12   0    0.20    0.80
   0 -12   0    0.80    0.80
   0 -12   0   -1.20    0.90
   0  12   0    0.00    0.90
   0  12   0    0.30    0.90
   2 -12   0    0.00    0.80
  -2 -12   0    1.00    0.80
  -2 -12   0   -3.10    0.80
   2 -12   0    1.90    1.00
   2 -12   0    0.80    1.00
  -2 -12   0    0.90    1.00
   2 -12   0   -0.50    0.80
   2 -12   0   -0.80    0.80
   2 -12   0   -1.00    0.90
  -2 -12   0   -0.30    0.80
   2  12   0   -0.30    0.90
  -2  12   0   -0.20    0.90
   2  12   0   -0.20    0.80
  -4 -12   0    6.00    0.90
  -4 -12   0    5.00    1.10
   4 -12   0    3.30    1.00
   4 -12   0    5.50    1.20
  -4 -12   0    3.30    1.20
   4 -12   0    5.90    1.10
   4 -12   0    2.30    1.10
   4 -12   0    5.10    1.10
   4 -12   0    5.10    1.10
   4  12   0    4.90    1.10
   4  12   0    5.30    1.10
  -4  12   0    5.40    1.10
   6 -12   0    9.20    1.40
  -6 -12   0    8.20    1.30
   6 -12   0    7.30    1.20
   6 -12   0    8.50    1.40
   6 -12   0    9.40    1.30
   6 -12   0    9.30    1.30
  -6 -12   0   10.70    1.20
   6 -12   0    8.60    1.40
  -6 -12   0    7.00    1.20
   6  12   0    8.80    1.30
   6  12   0    8.80    1.20
  -6  12   0    9.30    1.20
   8 -12   0    9.10    1.30
   8 -12   0    6.50    1.20
   8 -12   0    8.80    1.30
  -8 -12   0    8.50    1.30
   8 -12   0    9.00    1.50
  -8 -12   0    9.80    1.20
   8 -12   0    8.00    1.30
  -8 -12   0    8.50    1.50
   8 -12   0    8.40    1.40
   8  12   0    9.90    1.50
   8  12   0    8.70    1.30
  10 -12   0   -0.10    0.90
  10 -12   0    0.80    0.90
  10 -12   0    0.30    0.90
 -10 -12   0    0.20    0.90
  10 -12   0   -0.10    0.80
  10 -12   0    2.30    1.00
  10 -12   0    0.20    1.10
 -10 -12   0    0.40    0.80
 -10 -12   0   -0.50    0.80
  10  12   0    0.40    0.90
  10  12   0   -0.20    1.00
  10  12   0    0.70    1.00
  12 -12   0    2.30    1.10
  12 -12   0    2.40    1.20
  12 -12   0    3.60    1.30
  12 -12   0    3.20    1.10
 -12 -12   0    3.90    1.10
  12 -12   0    2.60    1.00
 -12 -12   0    3.80    1.10
 -12 -12   0    4.10    1.30
  12 -12   0    2.90    1.10
  12  12   0    3.30    1.20
  12  12   0    3.10    1.00
  12  12   0    3.40    1.30
  14 -12   0    4.80    1.10
  14 -12   0    3.60    1.10
  14 -12   0    6.00    1.20
  14 -12   0    3.80    1.20
  14 -12   0    5.10    1.40
 -14 -12   0    4.50    1.40
 -14 -12   0    4.80    1.10
 -14 -12   0    4.30    1.20
  14 -12   0    3.20    1.00
  14  12   0    2.50    1.20
  14  12   0    5.20    1.30
  14  12   0    3.90    1.10
  14  12   0    4.10    1.20
  16 -12   0   19.90    1.80
  16 -12   0   16.30    1.70
  16 -12   0   16.10    1.60
 -16 -12   0   18.00    1.90
  16 -12   0   16.70    1.90
  16 -12   0   20.90    2.10
 -16 -12   0   21.10    1.90
  16 -12   0   13.10    1.60
 -16 -12   0   19.30    2.00
  16  12   0   16.90    2.00
  16  12   0   18.30    1.60
  16  12   0   18.00    1.90
  16  12   0   18.20    1.90
  16  12   0   19.40    2.00
  18 -12   0   10.20    1.70
 -18 -12   0   11.80    1.70
  18 -12   0   13.50    1.50
 -18 -12   0   10.60    1.70
  18 -12   0    9.60    1.70
  18 -12   0   12.50    1.70
 -18 -12   0   10.90    1.60
  18 -12   0   11.70    1.30
  18 -12   0   11.00    1.50
  18  12   0   15.00    1.90
  18  12   0   13.70    1.80
  18  12   0    9.50    1.50
  18  12   0   11.70    1.70
  18  12   0   10.40    1.20
  20 -12   0    1.60    1.30
 -20 -12   0    1.10    1.20
  20 -12   0    0.40    1.10
  20 -12   0    1.10    1.00
 -20 -12   0    0.00    1.20
  20 -12   0    0.90    1.00
  20 -12   0   -0.60    0.70
  20 -12   0   -0.90    1.20
 -20 -12   0    0.40    1.00
  20  12   0   -0.50    1.10
 -20  12   0    0.90    1.20
  20  12   0   -0.20    1.10
  20  12   0   -0.20    0.80
  20  12   0   -0.80    1.10
  20  12   0    1.90    1.10
   1 -13   0   18.10    2.00
  -1 -13   0   16.20    1.80
   1 -13   0   18.00    1.70
   1 -13   0   18.70    1.90
  -1 -13   0   16.60    1.70
  -1 -13   0   19.20    1.90
   1 -13   0   14.80    1.70
   1  13   0   21.40    1.80
   1  13   0   15.20    1.60
  -1  13   0   17.30    1.70
   3 -13   0    5.20    1.20
   3 -13   0    0.90    1.00
   3 -13   0    1.30    0.90
   3 -13   0    1.20    1.00
  -3 -13   0    1.10    0.90
  -3 -13   0    4.00    1.20
   3 -13   0   -0.20    0.90
   3 -13   0    4.10    1.10
  -3  13   0    1.60    1.00
   3  13   0    0.50    0.90
   3  13   0    2.80    1.20
   5 -13   0    5.40    1.20
  -5 -13   0    5.00    1.20
   5 -13   0    1.90    1.10
   5 -13   0    5.70    1.20
   5 -13   0    4.20    1.20
  -5 -13   0    5.00    1.20
   5 -13   0    4.20    1.20
   5 -13   0    3.60    1.20
   5  13   0    3.20    1.20
  -5  13   0    6.30    1.20
   5  13   0    5.40    1.20
   7 -13   0   24.90    2.00
   7 -13   0   26.30    2.10
  -7 -13   0   21.40    2.10
   7 -13   0   23.80    1.90
   7 -13   0   25.30    2.10
  -7 -13   0   29.30    2.40
   7 -13   0   29.30    2.20
   7 -13   0   25.40    2.10
   7  13   0   30.50    2.30
   7  13   0   23.70    2.00
   9 -13   0    6.50    1.40
   9 -13   0    8.80    1.40
   9 -13   0    6.50    1.30
   9 -13   0    8.10    1.50
   9 -13   0    5.90    1.30
   9 -13   0    6.40    1.40
  -9 -13   0    9.50    1.60
  -9 -13   0    7.90    1.40
   9  13   0    7.10    1.30
   9  13   0    7.80    1.50
  11 -13   0    0.30    1.00
  11 -13   0    1.70    1.10
 -11 -13   0    1.70    1.20
 -11 -13   0    1.30    1.20
  11 -13   0    1.30    0.90
  11 -13   0    0.80    1.20
  11 -13   0    0.10    1.00
  11 -13   0    0.00    1.00
 -11 -13   0   -1.10    0.80
  11  13   0   -1.00    1.20
  11  13   0   -1.40    0.90
  13 -13   0    4.30    1.20
  13 -13   0    2.80    1.10
 -13 -13   0    3.40    1.20
  13 -13   0    2.80    1.20
 -13 -13   0    3.10    1.40
  13 -13   0    2.60    1.40
  13 -13   0    4.40    1.30
  13 -13   0    4.70    1.30
 -13 -13   0    4.40    1.10
  13  13   0    3.50    1.30
  13  13   0    1.60    1.10
  13  13   0    1.90    1.00
  15 -13   0    3.20    1.10
  15 -13   0    3.40    1.40
 -15 -13   0    4.60    1.40
  15 -13   0    3.00    1.10
  15 -13   0    2.70    1.40
 -15 -13   0    2.50    1.40
  15 -13   0    2.40    1.10
 -15 -13   0    3.60    1.20
  15 -13   0    2.10    1.10
  15  13   0    3.30    1.40
  15  13   0    5.40    1.50
  15  13   0    2.40    1.10
   0 -14   0    0.00    1.20
   0 -14   0    0.30    1.10
   0 -14   0    0.60    1.10
   0  14   0   -1.30    0.90
   2 -14   0    1.60    1.20
   2 -14   0    0.00    0.90
  -2 -14   0    2.10    1.20
   2 -14   0    0.10    1.20
  -2 -14   0    1.60    1.20
   2  14   0    1.10    1.10
   2  14   0    1.30    1.00
  -2  14   0    1.50    1.10
   4 -14   0    3.30    1.20
  -4 -14   0    8.30    1.50
   4 -14   0    5.40    1.30
  -4 -14   0    6.90    1.40
   4 -14   0    6.50    1.60
   4 -14   0    7.80    1.40
   4  14   0    4.80    1.40
   4  14   0    5.10    1.30
   6 -14   0   15.90    1.80
   6 -14   0   12.40    1.70
  -6 -14   0   14.40    1.90
   6 -14   0   15.00    1.80
   6 -14   0   16.80    1.90
   6 -14   0   13.80    1.80
   6 -14   0   15.20    1.80
  -6 -14   0   16.40    1.90
   6  14   0   13.90    1.70
   6  14   0   14.80    1.70
  -8 -14   0    5.00    1.40
   8 -14   0    5.10    1.40
   8 -14   0    4.30    1.30
   8 -14   0    4.40    1.20
   8 -14   0    6.50    1.40
   8 -14   0    6.80    1.40
  -8 -14   0    4.10    1.20
   8 -14   0    1.20    1.40
   8  14   0    6.30    1.40
   8  14   0    4.30    1.50
  10 -14   0    8.60    1.50
  10 -14   0    9.60    1.70
  10 -14   0    8.70    1.50
 -10 -14   0   10.60    1.80
  10 -14   0    7.90    1.40
  10 -14   0    9.50    1.50
 -10 -14   0   10.40    1.70
  10 -14   0    9.80    1.70
  10  14   0    7.90    1.70
  10  14   0    8.50    1.50
 -34   0   1   -0.50    1.00
  34   0  -1    1.80    1.20
 -34   0   1    1.20    1.00
  34   0  -1    0.30    0.60
  34   0  -1    0.10    1.00
 -34   0   1   -1.20    0.90
  34   0  -1    0.10    1.10
  34   0  -1   -0.10    0.60
 -32   0   1   -2.40    1.00
  32   0  -1   -0.60    0.50
  32   0  -1    0.00    0.50
  32   0  -1    0.60    0.90
  32   0  -1   -0.30    0.90
  32   0  -1    0.60    1.10
 -32   0   1   -1.40    1.00
 -32   0   1    0.50    0.90
 -32   0   1   -0.50    0.80
  30   0  -1   -0.10    1.00
  30   0  -1    0.20    0.90
  30   0  -1    0.60    0.50
 -30   0   1   -0.10    0.80
  30   0  -1   -0.80    0.70
 -30   0   1    0.00    0.90
 -30   0   1    1.70    0.90
  30   0  -1   -0.40    0.50
  28   0  -1    1.30    0.90
  28   0  -1   -1.50    0.80
  28   0  -1   -0.30    0.70
 -28   0   1    1.20    1.00
 -28   0   1    0.20    0.80
 -28   0   1    0.20    0.80
  28   0  -1   -0.10    0.80
  28   0  -1    0.60    0.40
  28   0  -1    0.00    0.40
  26   0  -1    0.60    0.40
  26   0  -1    0.30    0.70
 -26   0   1   -1.10    0.80
 -26   0   1    0.30    0.70
  26   0  -1    0.40    0.40
  26   0  -1    0.70    0.80
  26   0  -1   -1.70    0.60
  26   0  -1    1.30    0.80
 -26   0   1   -0.40    0.70
  24   0  -1    0.10    0.50
 -24   0   1    1.00    0.70
  24   0  -1    2.10    0.90
  24   0  -1    0.30    0.40
 -24   0   1   -0.90    0.70
  24   0  -1    0.00    0.70
  24   0  -1   -0.20    0.60
  24   0  -1    0.50    0.70
 -24   0   1   -1.60    0.60
  24   0  -1    0.50    0.40
  22   0  -1   -0.50    0.30
  22   0  -1   -0.20    0.20
 -22   0   1   -0.20    0.50
  22   0  -1   -0.60    0.50
  22   0  -1   -0.30    0.60
  22   0  -1   -0.40    0.30
  22   0  -1   -0.20    0.50
  22   0  -1   -0.20    0.30
  22   0  -1    0.50    0.70
 -22   0   1   -0.10    0.60
  22   0  -1    0.20    0.30
  22   0  -1   -0.10    0.20
  22   0  -1   -0.40    0.40
 -22   0   1   -0.80    0.60
 -20   0   1    0.30    0.50
 -20   0   1    0.20    0.40
  20   0  -1   -0.10    0.20
  20   0  -1    0.20    0.20
  20   0  -1   -0.10    0.30
  20   0  -1   -1.10    0.40
  20   0  -1    0.00    0.30
  20   0  -1    0.20    0.50
 -20   0   1    0.90    0.60
  20   0  -1   -0.20    0.30
  20   0  -1    0.10    0.40
  20   0  -1    0.30    0.30
  20   0  -1    0.50    0.50
  20   0  -1   -0.90    0.50
  18   0  -1   -0.10    0.50
  18   0  -1    0.00    0.20
  18   0  -1    0.20    0.20
  18   0  -1    0.20    0.60
 -18   0   1    0.30    0.50
  18   0  -1    0.00    0.50
  18   0  -1   -0.40    0.30
  18   0  -1    0.10    0.20
 -18   0   1   -0.10    0.50
  18   0  -1   -0.50    0.20
 -18   0   1   -0.40    0.40
  18   0  -1    0.40    0.30
  18   0  -1    0.80    0.40
  18   0  -1    0.00    0.20
  16   0  -1   -0.20    0.40
 -16   0   1   -0.10    0.40
  16   0  -1    0.20    0.20
  16   0  -1    0.10    0.20
  16   0  -1   -0.30    0.20
 -16   0   1   -0.30    0.40
  16   0  -1    0.20    0.40
  16   0  -1    0.20    0.20
  16   0  -1    0.00    0.20
  16   0  -1    0.10    0.50
  16   0  -1    0.10    0.20
  16   0  -1   -0.10    0.20
 -16   0   1    0.60    0.40
  16   0  -1    0.20    0.40
  14   0  -1    0.60    0.40
  14   0  -1    0.20    0.20
  14   0  -1   -0.20    0.20
  14   0  -1   -0.20    0.40
 -14   0   1    0.20    0.40
  14   0  -1    0.10    0.20
  14   0  -1   -0.10    0.20
  14   0  -1    0.20    0.20
 -14   0   1   -0.30    0.30
  14   0  -1    0.30    0.30
  14   0  -1   -0.30    0.20
  14   0  -1    0.60    0.40
  14   0  -1    0.30    0.30
 -12   0   1   -0.60    0.40
  12   0  -1    0.10    0.20
  12   0  -1   -0.10    0.20
  12   0  -1   -0.30    0.20
  12   0  -1    0.50    0.40
  12   0  -1    0.10    0.20
  12   0  -1    0.00    0.20
  12   0  -1    0.10    0.20
  12   0  -1    0.00    0.20
  12   0  -1   -0.20    0.40
 -12   0   1   -0.40    0.40
  12   0  -1   -0.60    0.30
  12   0  -1    0.00    0.30
  10   0  -1    0.00    0.10
  10   0  -1    0.00    0.20
  10   0  -1   -0.10    0.10
 -10   0   1   -0.30    0.30
  10   0  -1   -0.10    0.20
  10   0  -1   -0.10    0.10
  10   0  -1   -0.20    0.20
  10   0  -1   -0.10    0.20
  10   0  -1    0.00    0.20
  10   0  -1   -0.20    0.20
  10   0  -1    0.10    0.20
  10   0  -1   -0.10    0.30
 -10   0   1   -0.60    0.30
   8   0  -1   -0.20    0.20
  -8   0   1   -0.20    0.30
   8   0  -1    0.10    0.20
   8   0  -1   -0.20    0.20
   8   0  -1    0.60    0.30
  -8   0   1   -0.50    0.30
   8   0  -1   -0.20    0.30
   6   0  -1   -0.10    0.20
   6   0  -1    0.10    0.20
   6   0  -1    0.20    0.10
   6   0  -1    0.20    0.10
   6   0  -1    0.00    0.10
   6   0  -1    0.40    0.20
  -6   0   1   -0.30    0.20
   6   0  -1    0.40    0.20
   6   0  -1    0.40    0.10
   6   0  -1    0.30    0.10
   6   0  -1    0.10    0.20
  -6   0   1   -0.10    0.20
   6   0  -1    0.30    0.20
  -4   0   1   -8.70    0.30
   4   0  -1   -9.60    0.20
   4   0  -1   -9.20    0.20
   4   0  -1   -9.50    0.20
  -4   0   1   -9.50    0.30
   2   0  -1   -0.30    0.10
  -2   0   1   -0.10    0.10
   2   0  -1   -0.40    0.10
   2   0  -1   -0.40    0.10
   0   0   1   -0.30    0.10
   2   0   1    0.10    0.10
   2   0   1    0.00    0.10
   2   0   1   -0.20    0.10
   4   0   1   -0.10    0.20
   4   0   1    0.00    0.20
   4   0   1   -0.10    0.20
   4   0   1    0.10    0.10
   4   0   1   -0.20    0.20
   4   0   1    0.00    0.20
   4   0   1   -0.10    0.20
  -6   0  -1   -0.40    0.30
   6   0   1    0.50    0.30
   6   0   1    0.50    0.30
   6   0   1    0.60    0.30
   6   0   1    0.30    0.20
   6   0   1    0.00    0.10
   6   0   1   -0.10    0.10
   6   0   1   -0.90    0.30
   8   0   1   -0.50    0.20
  -8   0  -1   -0.30    0.30
   8   0   1    0.50    0.30
   8   0   1   -0.20    0.10
   8   0   1    0.00    0.30
   8   0   1   -0.10    0.30
   8   0   1   -0.20    0.20
   8   0   1   -0.30    0.30
   8   0   1    0.00    0.10
  10   0   1    0.00    0.10
  10   0   1   -0.30    0.20
  10   0   1   -0.10    0.30
  10   0   1   -0.20    0.20
  10   0   1    0.00    0.10
  10   0   1   -0.30    0.30
  10   0   1    0.30    0.10
  10   0   1    0.00    0.30
 -10   0  -1   -0.20    0.30
  10   0   1    0.20    0.30
 -10   0  -1   -0.30    0.30
  12   0   1    0.00    0.10
 -12   0  -1   -0.40    0.40
  12   0   1   -0.50    0.30
  12   0   1   -0.50    0.30
  12   0   1    0.40    0.30
  12   0   1    0.20    0.40
 -12   0  -1   -0.20    0.30
  12   0   1   -0.10    0.30
  12   0   1   -0.10    0.10
  12   0   1    0.40    0.40
  12   0   1    0.00    0.10
  12   0   1   -0.10    0.20
  14   0   1    0.20    0.20
  14   0   1    0.00    0.40
  14   0   1   -0.30    0.40
 -14   0  -1   -0.20    0.30
  14   0   1    0.10    0.40
 -14   0  -1    0.00    0.40
  14   0   1    0.00    0.10
  14   0   1    0.30    0.10
  14   0   1   -0.50    0.50
  14   0   1    0.10    0.20
  14   0   1   -0.20    0.30
 -14   0  -1    0.20    0.40
  14   0   1    0.20    0.10
  14   0   1    0.10    0.20
  14   0   1    0.10    0.20
  16   0   1    0.00    0.20
  16   0   1    0.20    0.30
  16   0   1   -0.20    0.20
  16   0   1    0.20    0.40
 -16   0  -1    0.00    0.40
  16   0   1   -0.10    0.20
  16   0   1   -0.70    0.40
  16   0   1    0.10    0.10
  16   0   1    0.10    0.50
  16   0   1    0.10    0.10
 -16   0  -1   -0.10    0.50
  16   0   1    0.10    0.20
  16   0   1    0.20    0.40
 -16   0  -1   -0.10    0.30
  18   0   1    0.40    0.50
 -18   0  -1   -0.40    0.50
  18   0   1   -0.10    0.30
  18   0   1    0.30    0.50
  18   0   1    0.20    0.40
 -18   0  -1   -0.60    0.40
 -18   0  -1   -0.40    0.50
  18   0   1   -0.10    0.50
  18   0   1    0.30    0.20
  18   0   1   -0.30    0.40
  18   0   1   -0.10    0.20
  18   0   1   -0.50    0.20
  20   0   1    0.10    0.20
  20   0   1    0.10    0.20
 -20   0  -1   -0.50    0.50
  20   0   1   -0.40    0.50
  20   0   1    1.10    0.60
  20   0   1    0.60    0.50
  20   0   1    0.30    0.30
 -20   0  -1   -0.30    0.40
  20   0   1    0.00    0.40
  20   0   1    0.00    0.30
  20   0   1    0.10    0.50
 -20   0  -1    1.00    0.50
  22   0   1    0.10    0.60
  22   0   1   -0.40    0.30
  22   0   1   -0.20    0.30
 -22   0  -1   -1.60    0.50
  22   0   1    0.10    0.30
 -22   0  -1   -0.20    0.60
  22   0   1    0.00    0.70
  22   0   1   -0.20    0.50
  22   0   1    0.30    0.30
 -22   0  -1   -1.20    0.50
  22   0   1    0.30    0.70
  22   0   1    0.00    0.70
  24   0   1    1.20    0.70
 -24   0  -1    0.10    0.80
  24   0   1    0.60    0.40
 -24   0  -1   -0.50    0.70
  24   0   1   -1.10    0.70
  24   0   1    0.60    0.40
  24   0   1    1.00    0.70
 -24   0  -1    0.50    0.60
  24   0   1   -1.10    0.70
  24   0   1    0.40    0.50
  26   0   1   -0.50    0.70
  26   0   1    0.10    0.40
  26   0   1   -0.30    0.70
 -26   0  -1   -0.30    0.70
 -26   0  -1    0.70    0.90
 -26   0  -1   -0.60    0.70
  26   0   1    0.20    0.70
  26   0   1    0.50    0.40
  26   0   1   -1.30    0.60
 -28   0  -1    1.20    0.80
  28   0   1    0.00    0.90
 -28   0  -1    0.50    0.80
 -28   0  -1    0.80    1.00
  28   0   1    0.10    0.80
 -28   0  -1   -0.70    0.70
  28   0   1    0.60    0.40
  28   0   1    0.10    0.80
  28   0   1   -0.10    0.40
  28   0   1    0.80    0.70
  30   0   1   -0.60    0.40
 -30   0  -1    0.80    1.10
 -30   0  -1    0.10    1.00
  30   0   1   -0.10    0.90
 -30   0  -1    1.00    0.90
  30   0   1    0.50    0.80
  30   0   1    0.20    0.50
 -30   0  -1    1.00    0.80
  30   0   1    1.80    1.20
 -32   0  -1    0.80    0.90
 -32   0  -1   -0.80    0.90
  32   0   1    0.40    0.50
  32   0   1    0.20    0.50
 -32   0  -1    0.00    0.80
  32   0   1   -1.40    0.90
  32   0   1    0.00    0.80
  32   0   1   -2.70    1.00
  33  -1  -1    0.30    1.10
  33  -1  -1    2.20    1.10
 -33  -1   1    0.50    1.00
  33  -1  -1    2.20    0.60
  33  -1  -1    1.00    0.60
 -33  -1   1    2.10    1.20
  33  -1  -1    0.00    1.00
  33   1  -1    2.20    0.70
  33   1  -1    2.00    0.70
  33   1  -1    0.40    1.10
  33   1  -1   -0.40    1.00
 -33   1   1    1.50    1.00
  33   1  -1    1.80    1.10
 -33   1   1    1.00    1.30
 -33   1   1    0.90    1.00
 -33   1   1    0.00    1.10
 -31  -1   1    0.90    0.80
  31  -1  -1   -0.30    0.90
  31  -1  -1    0.00    0.50
  31  -1  -1    2.20    1.10
  31  -1  -1    0.90    0.90
 -31  -1   1    0.20    1.10
 -31  -1   1    1.40    1.20
  31  -1  -1    1.30    0.50
  31   1  -1    0.30    0.90
  31   1  -1    0.60    1.00
 -31   1   1   -0.80    1.00
 -31   1   1   -0.10    0.80
  31   1  -1    0.90    1.10
  31   1  -1    0.90    0.60
 -31   1   1    1.80    0.90
  31   1  -1    0.30    0.50
  29  -1  -1    3.00    0.60
 -29  -1   1    2.60    1.20
 -29  -1   1    2.20    0.90
  29  -1  -1    3.80    1.10
  29  -1  -1    2.60    1.00
 -29  -1   1    2.30    1.00
 -29  -1   1    3.80    0.90
  29  -1  -1    2.70    1.10
  29  -1  -1    2.90    0.60
  29   1  -1    3.10    0.60
 -29   1   1    2.90    1.00
  29   1  -1    4.30    1.10
  29   1  -1    2.10    1.10
  29   1  -1    3.80    0.70
 -29   1   1    2.10    1.00
 -29   1   1    2.60    1.10
  29   1  -1    3.10    1.10
  29   1  -1    3.30    1.00
 -27  -1   1    4.40    0.90
  27  -1  -1    4.70    1.10
  27  -1  -1    5.30    1.10
  27  -1  -1    5.90    0.60
  27  -1  -1    5.30    1.20
 -27  -1   1    5.10    1.10
  27  -1  -1    4.40    0.60
 -27  -1   1    4.60    0.90
 -27   1   1    4.00    1.00
  27   1  -1    3.70    0.60
 -27   1   1    5.50    1.00
  27   1  -1    4.10    1.00
  27   1  -1    6.00    1.10
  27   1  -1    6.30    1.00
 -27   1   1    3.70    1.00
  27   1  -1    5.60    0.70
  27   1  -1    4.00    1.00
  25  -1  -1   10.10    0.80
  25  -1  -1   11.40    1.40
 -25  -1   1   12.90    1.20
 -25  -1   1   13.80    1.40
  25  -1  -1   11.40    1.30
 -25  -1   1   11.10    1.20
  25  -1  -1   11.60    0.80
  25  -1  -1   10.90    1.10
  25  -1  -1   10.30    1.30
  25   1  -1   11.20    1.30
 -25   1   1   11.80    1.30
  25   1  -1   12.30    1.00
  25   1  -1   10.30    1.20
 -25   1   1    8.70    1.10
  25   1  -1   11.60    0.60
  25   1  -1   10.00    0.60
  25   1  -1   10.40    1.20
  25   1  -1   11.50    1.30
  25   1  -1   10.80    0.90
 -25   1   1    9.10    1.20
  25   1  -1   10.90    0.90
  23  -1  -1    0.30    0.60
 -23  -1   1    0.30    0.60
 -23  -1   1   -0.50    0.60
  23  -1  -1    0.10    0.50
  23  -1  -1   -0.40    0.30
  23  -1  -1   -0.10    0.30
  23  -1  -1   -0.60    0.60
  23  -1  -1   -0.40    0.30
  23  -1  -1   -0.20    0.40
 -23  -1   1   -0.20    0.60
  23  -1  -1    0.40    0.30
  23  -1  -1   -1.10    0.50
  23   1  -1   -0.50    0.40
  23   1  -1   -1.00    0.80
 -23   1   1   -1.00    0.70
  23   1  -1    0.40    0.60
  23   1  -1   -0.20    0.30
  23   1  -1    0.30    0.50
  23   1  -1    0.10    0.30
 -23   1   1    0.90    0.70
  23   1  -1   -0.20    0.60
  23   1  -1    0.40    0.70
 -23   1   1   -0.80    0.60
  23   1  -1    0.10    0.40
  21  -1  -1   22.70    1.00
  21  -1  -1   21.70    1.30
  21  -1  -1   24.20    1.20
  21  -1  -1   21.20    1.00
 -21  -1   1   22.90    1.40
  21  -1  -1   23.40    1.00
 -21  -1   1   23.60    1.40
  21  -1  -1   23.80    1.50
  21  -1  -1   22.40    1.60
  21  -1  -1   23.70    1.10
  21  -1  -1   23.60    1.60
 -21  -1   1   18.20    1.40
 -21   1   1   20.80    1.50
  21   1  -1   22.80    1.00
 -21   1   1   21.90    1.50
  21   1  -1   21.00    1.00
  21   1  -1   23.50    1.50
  21   1  -1   20.90    1.50
  21   1  -1   21.20    1.40
  21   1  -1   21.40    1.10
  21   1  -1   23.50    1.20
  21   1  -1   24.50    1.60
  21   1  -1   20.70    1.10
  19  -1  -1    0.70    0.30
 -19  -1   1    0.90    0.50
  19  -1  -1    0.20    0.50
  19  -1  -1    0.70    0.30
 -19  -1   1    1.00    0.50
  19  -1  -1    1.30    0.50
  19  -1  -1    1.30    0.50
  19  -1  -1    1.30    0.30
 -19  -1   1    1.40    0.50
  19  -1  -1    1.40    0.40
  19  -1  -1    1.10    0.20
  19  -1  -1    1.20    0.20
  19  -1  -1    1.40    0.30
  19  -1  -1    1.60    0.50
 -19   1   1    1.50    0.50
  19   1  -1    0.60    0.40
  19   1  -1    1.00    0.60
  19   1  -1    0.80    0.30
  19   1  -1    0.60    0.60
  19   1  -1    1.00    0.40
  19   1  -1    1.00    0.30
  19   1  -1    0.80    0.30
  19   1  -1    1.40    0.60
  19   1  -1    1.30    0.60
 -19   1   1    1.00    0.60
  19   1  -1    1.00    0.30
  19   1  -1    1.10    0.30
 -17  -1   1    1.40    0.60
 -17  -1   1    3.00    0.50
  17  -1  -1    3.00    0.30
  17  -1  -1    2.80    0.30
 -17  -1   1    2.10    0.50
  17  -1  -1    2.30    0.60
  17  -1  -1    2.50    0.60
  17  -1  -1    2.10    0.30
  17  -1  -1    2.30    0.60
  17  -1  -1    2.70    0.50
  17  -1  -1    2.30    0.30
 -17   1   1    3.60    0.60
  17   1  -1    2.40    0.60
  17   1  -1    2.70    0.40
  17   1  -1    2.70    0.50
 -17   1   1    1.60    0.60
  17   1  -1    2.10    0.40
  17   1  -1    3.40    0.40
  17   1  -1    1.70    0.60
  17   1  -1    2.70    0.60
  17   1  -1    2.80    0.40
  17   1  -1    2.60    0.60
  17   1  -1    2.60    0.40
  15  -1  -1    3.40    0.30
 -15  -1   1    3.60    0.70
  15  -1  -1    3.10    0.30
  15  -1  -1    3.00    0.60
 -15  -1   1    4.20    0.60
  15  -1  -1    3.70    0.60
 -15  -1   1    3.00    0.50
  15  -1  -1    4.60    0.50
  15  -1  -1    3.90    0.30
  15  -1  -1    3.20    0.60
  15  -1  -1    3.40    0.30
  15  -1  -1    3.60    0.60
  15  -1  -1    3.60    0.30
  15  -1  -1    2.30    0.30
 -15   1   1    3.70    0.60
  15   1  -1    4.20    0.40
  15   1  -1    3.30    0.50
  15   1  -1    3.90    0.40
  15   1  -1    3.80    0.40
  15   1  -1    4.40    0.60
  15   1  -1    5.00    0.70
  15   1  -1    3.70    0.40
  15   1  -1    3.90    0.40
 -15   1   1    2.90    0.50
  15   1  -1    4.80    0.70
  15   1  -1    3.90    0.40
  13  -1  -1    1.00    0.20
  13  -1  -1    0.80    0.20
  13  -1  -1    0.90    0.50
  13  -1  -1    0.90    0.30
  13  -1  -1    0.70    0.20
 -13  -1   1    0.20    0.40
  13  -1  -1    0.90    0.40
  13  -1  -1    0.80    0.20
  13  -1  -1    0.30    0.50
  13  -1  -1    0.70    0.20
  13  -1  -1    1.20    0.40
  13  -1  -1    1.00    0.40
 -13  -1   1    1.00    0.40
 -13  -1   1    0.40    0.40
  13  -1  -1    0.70    0.20
  13   1  -1    0.60    0.30
  13   1  -1    0.20    0.30
  13   1  -1    0.80    0.40
  13   1  -1    0.90    0.30
  13   1  -1    0.50    0.20
  13   1  -1    0.40    0.20
  13   1  -1    0.30    0.40
  13   1  -1    0.40    0.30
 -13   1   1    0.60    0.50
  13   1  -1    0.90    0.40
  13   1  -1    1.00    0.30
  13   1  -1    0.30    0.40
 -13   1   1    1.20    0.50
  11  -1  -1    1.40    0.20
  11  -1  -1    1.50    0.20
  11  -1  -1    1.80    0.20
 -11  -1   1    1.50    0.40
  11  -1  -1    1.60    0.20
  11  -1  -1    1.80    0.20
  11  -1  -1    2.10    0.50
 -11  -1   1    1.20    0.40
  11  -1  -1    2.00    0.40
  11  -1  -1    1.60    0.40
  11  -1  -1    1.60    0.30
  11  -1  -1    1.20    0.40
 -11  -1   1    1.80    0.40
  11  -1  -1    1.90    0.30
  11   1  -1    1.70    0.30
  11   1  -1    1.00    0.30
  11   1  -1    1.90    0.30
  11   1  -1    1.90    0.30
  11   1  -1    1.50    0.30
  11   1  -1    1.70    0.40
  11   1  -1    1.70    0.30
  11   1  -1    0.80    0.30
  11   1  -1    1.50    0.30
  11   1  -1    2.70    0.40
  11   1  -1    2.10    0.40
 -11   1   1    1.80    0.40
 -11   1   1    1.80    0.40
   9  -1  -1  513.65   17.10
   9  -1  -1  478.05   17.70
   9  -1  -1  489.95   17.90
   9  -1  -1  479.15   17.50
   9  -1  -1  528.35   17.60
   9  -1  -1  534.45   17.70
   9  -1  -1  511.75   18.10
   9  -1  -1  524.55   17.50
  -9  -1   1  525.05   17.30
  -9  -1   1  502.05   17.80
  -9  -1   1  498.15   18.00
   9  -1  -1  490.85   17.50
   9   1  -1  523.25   17.60
   9   1  -1  515.35   18.20
   9   1  -1  554.84   17.60
  -9   1   1  507.75   17.40
   9   1  -1  527.15   17.80
   7  -1  -1   97.19    3.40
  -7  -1   1   96.99    3.60
   7  -1  -1   93.79    3.60
   7  -1  -1   99.69    3.50
   7  -1  -1   99.09    3.60
   7  -1  -1   97.59    3.50
   7  -1  -1   95.69    3.50
   7  -1  -1   98.99    3.40
  -7  -1   1  100.79    3.50
   7  -1  -1   98.49    3.40
  -7  -1   1  100.29    3.50
   7  -1  -1   98.49    3.40
   7  -1  -1   94.29    3.40
   7  -1  -1   97.19    3.40
   7  -1  -1   95.89    3.60
   7   1  -1   98.29    3.70
   7   1  -1  101.49    3.30
   7   1  -1  100.89    3.50
  -7   1   1   97.09    3.50
   7   1  -1   98.09    3.30
   5  -1  -1   11.30    0.60
  -5  -1   1   12.20    0.60
   5  -1  -1    9.50    0.60
   5  -1  -1   11.00    0.50
   5  -1  -1   11.00    0.50
  -5  -1   1   11.60    0.60
  -5  -1   1   11.30    0.60
   5  -1  -1   11.40    0.50
   5  -1  -1   12.70    0.60
   5   1  -1   11.80    0.50
   5   1  -1   11.20    0.60
   5   1  -1   12.00    0.60
   5   1  -1   11.20    0.60
  -5   1   1   11.30    0.60
   5   1  -1   11.90    0.60
   5   1  -1   13.50    0.70
   3  -1  -1   48.30    1.70
  -3  -1   1   46.20    1.60
   3  -1  -1   46.20    1.70
  -3  -1   1   44.70    1.70
   3   1  -1   44.50    1.70
   3   1  -1   39.80    1.60
   3   1  -1   45.00    1.70
   3   1  -1   44.60    1.70
   3   1  -1   46.20    1.70
   3   1  -1   47.60    1.70
   3   1  -1   43.10    1.70
   3   1  -1   45.40    1.70
  -1  -1   1   28.90    1.10
  -1  -1   1   29.40    1.10
  -1  -1   1   28.40    1.10
  -1  -1   1   30.30    1.10
   1  -1  -1   28.70    1.10
   1  -1  -1   28.60    1.10
  -1   1   1   28.30    1.10
   1   1  -1   28.30    1.10
   1   1  -1   29.60    1.10
  -1  -1  -1 1067.29   37.80
   1  -1   1 1134.89   37.50
   1  -1   1  921.01   37.70
   1  -1   1 1166.78   38.00
   1  -1   1 1145.09   37.40
  -1  -1  -1 1077.59   37.40
   1   1   1 1129.29   37.80
   1   1   1 1178.98   39.10
  -1   1  -1 1143.69   37.40
   3  -1   1   -0.40    0.20
  -3  -1  -1    0.00    0.10
   3  -1   1   -0.80    0.20
   3  -1   1   -0.60    0.10
   3  -1   1   -0.50    0.10
   3  -1   1   -0.50    0.10
   3  -1   1   -0.10    0.20
  -3  -1  -1   -0.80    0.10
   3  -1   1   -1.00    0.20
  -3  -1  -1   -0.50    0.20
   3  -1   1   -0.50    0.20
   3  -1   1   -0.70    0.20
   3   1   1   -0.50    0.10
   3   1   1   -0.40    0.20
   3   1   1   -0.70    0.10
   3   1   1   -0.40    0.20
   3   1   1   -0.50    0.20
   3   1   1   -0.80    0.10
   5  -1   1   49.60    1.80
  -5  -1  -1   50.99    2.00
   5  -1   1   51.69    2.00
   5  -1   1   51.29    1.90
  -5  -1  -1   51.49    1.90
   5  -1   1   53.29    1.80
   5  -1   1   51.49    2.00
  -5  -1  -1   52.99    1.90
   5  -1   1   51.99    2.00
   5  -1   1   50.69    1.90
   5  -1   1   53.49    1.90
   5   1   1   53.29    2.00
   5   1   1   52.69    2.00
   5   1   1   52.99    1.90
   5   1   1   52.09    1.90
   5   1   1   51.79    2.00
   7  -1   1   91.09    3.40
   7  -1   1  103.99    3.40
  -7  -1  -1   97.19    3.60
   7  -1   1   96.59    3.60
   7  -1   1   99.09    3.60
   7  -1   1   94.19    3.60
   7  -1   1   94.89    3.50
   7  -1   1   99.19    3.40
  -7  -1  -1  104.49    3.40
  -7  -1  -1   99.79    3.50
   7  -1   1   97.49    3.50
   7   1   1   95.49    3.60
   7   1   1   93.59    3.40
   7   1   1   99.09    3.40
   7   1   1   99.89    3.40
   7   1   1   97.79    3.50
   7   1   1   99.69    3.60
   7   1   1  103.29    3.50
   7   1   1  101.29    3.50
   7   1   1   96.39    3.70
   9  -1   1    1.70    0.40
   9  -1   1    1.70    0.30
   9  -1   1    4.70    0.40
  -9  -1  -1    1.30    0.30
   9  -1   1    2.10    0.30
   9  -1   1    1.60    0.40
  -9  -1  -1    1.90    0.40
   9  -1   1    0.50    0.30
   9   1   1    2.30    0.30
   9   1   1    0.50    0.30
   9   1   1    2.20    0.20
   9   1   1    1.80    0.30
   9   1   1    1.50    0.40
   9   1   1    2.00    0.30
  11  -1   1    0.40    0.30
  11  -1   1    0.40    0.40
 -11  -1  -1    0.10    0.30
  11  -1   1    0.30    0.30
 -11  -1  -1    0.20    0.30
  11  -1   1    0.40    0.30
  11  -1   1    0.80    0.40
  11  -1   1   -0.50    0.20
 -11  -1  -1    0.40    0.30
 -11   1  -1   -0.30    0.40
  11   1   1    0.00    0.20
  11   1   1   -0.20    0.30
  11   1   1    0.40    0.40
  11   1   1   -0.30    0.40
  11   1   1    0.20    0.30
  11   1   1    0.20    0.20
  11   1   1    0.30    0.20
  11   1   1   -0.30    0.20
  11   1   1    0.40    0.30
  11   1   1    0.20    0.20
  11   1   1    0.70    0.20
 -13  -1  -1  340.07   12.10
  13  -1   1  333.37   11.80
  13  -1   1  345.17   12.10
  13  -1   1  347.07   12.00
 -13  -1  -1  336.77   11.90
 -13  -1  -1  333.27   11.60
  13  -1   1  331.47   11.80
  13   1   1  325.07   12.10
 -13   1  -1  339.97   11.70
  13   1   1  348.07   11.70
  13   1   1  339.97   12.20
  13   1   1  361.66   11.70
  13   1   1  325.27   11.80
  13   1   1  317.97   11.70
  13   1   1  329.97   11.80
  13   1   1  333.27   11.80
  13   1   1  335.27   11.70
  13   1   1  360.06   11.80
 -15  -1  -1    3.10    0.50
  15  -1   1    3.00    0.20
  15  -1   1    2.90    0.60
 -15  -1  -1    3.60    0.50
  15  -1   1    3.10    0.20
  15  -1   1    3.20    0.50
  15  -1   1    3.50    0.60
  15  -1   1    2.70    0.60
 -15  -1  -1    2.90    0.60
  15  -1   1    2.20    0.40
  15  -1   1    3.40    0.60
  15   1   1    4.00    0.60
  15   1   1    3.20    0.30
  15   1   1    3.50    0.70
  15   1   1    2.90    0.30
  15   1   1    3.00    0.30
  15   1   1    2.50    0.60
  15   1   1    3.00    0.50
 -15   1  -1    2.70    0.60
  15   1   1    3.50    0.30
 -15   1  -1    2.10    0.60
  15   1   1    3.40    0.60
  15   1   1    2.50    0.40
  17  -1   1    0.10    0.40
  17  -1   1    0.20    0.20
  17  -1   1    0.10    0.50
 -17  -1  -1    0.00    0.40
  17  -1   1    0.10    0.40
  17  -1   1    0.20    0.20
  17  -1   1   -0.10    0.40
  17  -1   1    0.50    0.20
 -17  -1  -1   -0.40    0.50
  17  -1   1    0.30    0.50
  17  -1   1   -0.30    0.50
  17  -1   1    0.40    0.10
 -17  -1  -1    0.40    0.40
  17   1   1    0.20    0.30
  17   1   1   -0.60    0.50
  17   1   1    0.20    0.60
 -17   1  -1    0.20    0.40
  17   1   1    0.30    0.30
  17   1   1    0.20    0.40
 -17   1  -1    0.60    0.40
  17   1   1   -0.20    0.20
  17   1   1    0.20    0.20
  17   1   1    0.00    0.20
  17   1   1    1.00    0.60
  17   1   1    0.30    0.40
  17   1   1    0.50    0.20
 -19  -1  -1   15.30    1.30
  19  -1   1   17.60    1.10
 -19  -1  -1   17.00    1.10
  19  -1   1   16.80    0.70
  19  -1   1   16.90    1.00
  19  -1   1   18.30    0.80
  19  -1   1   16.60    1.20
 -19  -1  -1   17.40    1.10
  19  -1   1   15.70    1.30
  19  -1   1   15.50    0.80
  19  -1   1   18.10    0.80
  19  -1   1   16.30    1.30
  19  -1   1   16.70    1.30
  19   1   1   17.50    0.90
  19   1   1   17.80    1.10
  19   1   1   17.50    1.30
  19   1   1   15.40    1.30
 -19   1  -1   17.10    1.20
  19   1   1   16.20    1.20
  19   1   1   17.80    0.90
  19   1   1   17.10    1.20
  19   1   1   17.20    0.90
 -19   1  -1   14.10    1.20
  19   1   1   16.50    0.80
  19   1   1   17.70    0.80
 -21  -1  -1   -0.20    0.60
  21  -1   1    0.30    0.30
  21  -1   1    0.20    0.70
  21  -1   1    0.00    0.50
  21  -1   1    0.20    0.50
  21  -1   1    0.50    0.50
  21  -1   1    0.40    0.30
  21  -1   1    0.40    0.20
 -21  -1  -1   -0.60    0.50
 -21  -1  -1    0.40    0.50
  21  -1   1   -0.10    0.50
  21  -1   1    0.20    0.30
  21   1   1    0.00    0.60
  21   1   1    0.30    0.30
  21   1   1    0.50    0.40
  21   1   1    2.30    0.70
 -21   1  -1   -0.50    0.60
  21   1   1    0.10    0.30
  21   1   1    0.10    0.60
  21   1   1    0.10    0.30
  21   1   1    0.00    0.20
  21   1   1    0.00    0.40
  21   1   1   -0.20    0.20
  21   1   1    0.00    0.60
 -21   1  -1    0.60    0.60
  23  -1   1    9.20    0.60
 -23  -1  -1    8.40    1.20
  23  -1   1    8.50    0.60
  23  -1   1   10.80    1.20
  23  -1   1    9.70    1.00
 -23  -1  -1    8.10    0.90
  23  -1   1    9.70    0.60
  23  -1   1    7.80    1.10
 -23  -1  -1    9.20    1.20
  23  -1   1    8.80    1.10
  23  -1   1    8.40    0.60
  23  -1   1    9.40    0.90
 -23  -1  -1    7.90    0.90
  23   1   1    9.50    1.10
  23   1   1    9.00    0.70
  23   1   1    9.00    1.10
 -23   1  -1    8.70    1.10
  23   1   1    8.60    0.70
 -23   1  -1    7.20    1.10
 -23   1  -1    8.40    1.10
  23   1   1    9.20    0.90
  23   1   1    8.40    1.10
  23   1   1    9.10    1.10
 -25  -1  -1    0.60    0.60
 -25  -1  -1   -0.10    0.60
 -25  -1  -1    1.10    1.00
  25  -1   1    0.50    0.60
  25  -1   1    0.60    0.40
 -25  -1  -1    2.00    0.80
  25  -1   1    0.30    0.50
  25  -1   1    0.10    0.40
  25  -1   1    0.40    0.70
  25  -1   1    1.40    0.80
  25  -1   1    1.20    0.90
  25   1   1    0.50    0.80
  25   1   1    1.50    0.60
  25   1   1   -0.20    0.70
 -25   1  -1   -0.50    0.70
  25   1   1    0.40    0.90
 -25   1  -1    1.00    0.90
 -25   1  -1   -0.10    0.70
  25   1   1   -0.10    0.70
  25   1   1    0.00    0.40
  25   1   1    1.10    0.40
  27  -1   1   13.80    1.60
  27  -1   1   14.70    1.30
 -27  -1  -1   13.70    1.50
  27  -1   1   11.90    1.40
  27  -1   1   13.00    0.90
  27  -1   1   11.00    1.30
 -27  -1  -1   11.20    1.20
  27  -1   1   12.60    0.90
 -27  -1  -1   12.40    1.30
 -27  -1  -1   14.20    1.60
  27   1   1   14.60    1.00
  27   1   1   12.90    1.00
 -27   1  -1   14.00    1.60
 -27   1  -1   12.40    1.40
 -27   1  -1   12.60    1.30
  27   1   1   12.20    1.40
  27   1   1   13.30    1.50
  27   1   1   11.60    1.40
  27   1   1   12.40    1.40
  29  -1   1    6.90    1.20
 -29  -1  -1    6.50    1.20
 -29  -1  -1    6.80    1.10
  29  -1   1    7.80    0.70
 -29  -1  -1    5.10    1.00
  29  -1   1    5.90    1.10
 -29  -1  -1    6.30    1.20
  29  -1   1    7.30    1.30
  29  -1   1    6.30    0.70
 -29   1  -1    5.70    1.30
  29   1   1    6.00    0.70
  29   1   1    5.70    1.10
 -29   1  -1    4.70    1.10
  29   1   1    5.60    1.20
  29   1   1    6.00    0.70
  29   1   1    4.50    1.20
  29   1   1    7.10    1.30
 -29   1  -1    7.00    1.20
  31  -1   1   -0.70    0.50
 -31  -1  -1   -0.50    0.80
  31  -1   1   -0.20    0.50
  31  -1   1   -1.90    1.00
  31  -1   1   -0.80    0.80
  31  -1   1   -1.10    0.70
 -31  -1  -1   -1.70    1.00
 -31   1  -1   -0.30    0.90
  31   1   1    1.20    0.90
  31   1   1   -0.10    1.10
  31   1   1    0.20    0.50
  31   1   1    0.70    0.80
  31   1   1   -0.50    1.00
  31   1   1    0.70    0.50
 -31   1  -1   -0.60    0.90
 -31   1  -1    0.40    0.90
 -31   1  -1   -1.30    0.90
  33  -1   1   -2.20    0.80
 -33  -1  -1   -1.50    1.10
  33  -1   1   -0.60    0.90
  33  -1   1    0.10    0.50
  33  -1   1    1.70    1.10
  33  -1   1    0.40    0.50
 -33  -1  -1    1.50    1.20
 -33   1  -1    0.40    1.10
  33   1   1    0.30    1.00
  33   1   1    1.00    1.20
 -33   1  -1    0.40    0.90
  33   1   1   -0.20    0.60
 -33   1  -1    0.50    1.00
  33   1   1    0.10    1.20
  33   1   1    0.30    0.60
 -33   1  -1    1.80    1.20
  32  -2  -1    2.70    1.10
  32  -2  -1    3.60    1.20
  32  -2  -1    4.20    1.10
  32  -2  -1    2.30    0.60
 -32  -2   1    2.00    1.20
 -32  -2   1    2.50    1.10
  32  -2  -1    3.50    0.70
 -32   2   1    2.10    0.90
  32   2  -1    3.00    1.20
  32   2  -1    3.00    1.10
  32   2  -1    2.90    0.80
 -32   2   1    0.90    1.10
 -32   2   1    4.50    1.10
  32   2  -1    4.30    1.30
  32   2  -1    1.80    1.10
  32   2  -1    1.90    0.70
  30  -2  -1    1.70    0.50
  30  -2  -1    1.50    0.90
 -30  -2   1   -0.30    0.90
  30  -2  -1    1.00    1.00
  30  -2  -1    1.50    1.10
 -30  -2   1    1.60    1.10
  30  -2  -1    1.10    0.50
  30   2  -1    0.60    0.90
 -30   2   1    1.70    1.00
  30   2  -1    0.20    0.60
 -30   2   1    0.20    0.80
  30   2  -1    0.00    0.90
  30   2  -1    2.50    1.00
 -30   2   1    1.90    1.00
  30   2  -1    2.20    1.00
  30   2  -1    2.30    0.70
 -28  -2   1   49.99    2.50
  28  -2  -1   45.90    2.60
 -28  -2   1   45.40    2.40
  28  -2  -1   49.60    2.80
  28  -2  -1   45.30    2.60
  28  -2  -1   49.60    2.10
 -28  -2   1   45.40    2.70
 -28  -2   1   48.80    2.80
  28  -2  -1   47.50    2.10
  28   2  -1   45.70    2.70
  28   2  -1   49.80    1.90
  28   2  -1   50.09    2.90
  28   2  -1   53.59    2.70
 -28   2   1   49.80    2.60
 -28   2   1   46.80    2.70
  28   2  -1   49.80    2.70
  28   2  -1   44.90    1.90
  28   2  -1   46.80    2.20
 -28   2   1   48.80    2.70
  28   2  -1   49.60    2.20
 -26  -2   1    4.30    0.90
  26  -2  -1    3.00    1.00
 -26  -2   1    3.30    1.00
 -26  -2   1    2.70    1.00
  26  -2  -1    2.40    0.90
  26  -2  -1    4.20    0.50
  26  -2  -1    2.60    1.00
  26  -2  -1    4.30    0.60
 -26  -2   1    3.90    0.90
  26   2  -1    3.40    0.60
  26   2  -1    5.10    1.10
  26   2  -1    4.60    0.90
  26   2  -1    4.30    1.00
  26   2  -1    4.60    0.70
  26   2  -1    4.40    0.50
  26   2  -1    3.60    0.50
  26   2  -1    2.90    1.00
 -26   2   1    3.70    0.90
 -26   2   1    3.00    1.00
  26   2  -1    4.40    0.70
 -24  -2   1   26.00    1.60
  24  -2  -1   29.10    1.30
  24  -2  -1   28.70    1.60
 -24  -2   1   31.00    1.90
  24  -2  -1   27.40    1.30
 -24  -2   1   25.60    2.00
  24  -2  -1   30.90    1.90
 -24  -2   1   29.70    1.60
  24  -2  -1   24.60    1.70
  24  -2  -1   26.00    1.80
  24   2  -1   29.40    2.00
 -24   2   1   24.60    1.80
  24   2  -1   26.10    1.80
  24   2  -1   28.50    1.40
  24   2  -1   27.30    1.30
  24   2  -1   29.90    1.90
 -24   2   1   27.70    1.80
  24   2  -1   31.20    1.80
  24   2  -1   25.40    1.40
  24   2  -1   27.30    1.50
  24   2  -1   25.50    1.30
  22  -2  -1    1.30    0.30
  22  -2  -1    0.90    0.40
 -22  -2   1    2.30    0.80
  22  -2  -1    0.30    0.40
 -22  -2   1    1.10    0.60
  22  -2  -1    1.30    0.40
  22  -2  -1    1.10    0.50
  22  -2  -1    0.80    0.60
  22  -2  -1    1.10    0.60
 -22  -2   1    0.40    0.60
  22  -2  -1    0.90    0.40
  22  -2  -1    1.10    0.70
  22   2  -1    0.70    0.40
  22   2  -1    1.40    0.70
  22   2  -1    0.50    0.50
  22   2  -1    0.70    0.40
  22   2  -1    0.80    0.50
  22   2  -1    1.10    0.40
  22   2  -1    0.70    0.70
  22   2  -1    0.50    0.80
  22   2  -1    0.20    0.70
 -22   2   1    1.50    0.70
 -22   2   1    1.30    0.70
  20  -2  -1   19.40    0.90
  20  -2  -1   19.00    0.90
  20  -2  -1   18.90    1.10
 -20  -2   1   16.70    1.10
 -20  -2   1   16.90    1.40
  20  -2  -1   16.60    1.00
  20  -2  -1   15.80    1.30
 -20  -2   1   18.80    1.10
  20  -2  -1   17.90    0.90
  20  -2  -1   16.50    0.90
  20  -2  -1   16.70    1.30
  20  -2  -1   15.90    1.20
  20  -2  -1   18.20    1.30
  20   2  -1   18.40    1.10
  20   2  -1   17.20    1.30
  20   2  -1   10.00    1.20
  20   2  -1   17.70    1.00
  20   2  -1   17.60    1.20
  20   2  -1   17.00    1.30
  20   2  -1   18.60    1.00
  20   2  -1   16.50    1.00
 -20   2   1   14.20    1.20
  20   2  -1   17.00    0.90
  20   2  -1   17.70    1.10
  20   2  -1   16.30    1.00
 -20   2   1   16.30    1.30
  18  -2  -1    1.60    0.60
  18  -2  -1    1.40    0.60
  18  -2  -1    0.90    0.20
 -18  -2   1    0.90    0.60
 -18  -2   1    0.70    0.40
  18  -2  -1    0.80    0.50
 -18  -2   1    0.40    0.40
  18  -2  -1    1.50    0.30
  18  -2  -1    1.20    0.40
  18  -2  -1    1.60    0.60
  18  -2  -1    1.10    0.20
  18  -2  -1    1.80    0.40
  18  -2  -1    1.90    0.30
  18  -2  -1    1.30    0.30
  18  -2  -1    1.40    0.30
  18   2  -1    1.20    0.40
  18   2  -1   -0.20    0.30
  18   2  -1    0.90    0.30
  18   2  -1    1.40    0.50
  18   2  -1    0.90    0.40
 -18   2   1    0.90    0.50
  18   2  -1    1.60    0.50
 -18   2   1    1.00    0.60
  18   2  -1    1.10    0.40
  18   2  -1    2.30    0.60
  18   2  -1    1.30    0.40
  18   2  -1    0.50    0.20
  18   2  -1    1.50    0.60
  16  -2  -1   26.60    1.10
  16  -2  -1   28.20    1.10
  16  -2  -1   28.60    1.50
  16  -2  -1   26.70    1.10
  16  -2  -1   25.70    1.40
  16  -2  -1   27.90    1.10
 -16  -2   1   25.70    1.30
 -16  -2   1   26.80    1.30
  16  -2  -1   28.20    1.50
 -16  -2   1   26.60    1.50
  16  -2  -1   27.00    1.50
  16   2  -1   29.10    1.30
 -16   2   1   25.00    1.50
  16   2  -1   28.30    1.50
 -16   2   1   25.70    1.50
  16   2  -1   28.60    1.30
  16   2  -1   29.70    1.50
  16   2  -1   27.20    1.20
  16   2  -1   25.20    1.20
  16   2  -1   28.60    1.20
  16   2  -1   26.20    1.50
  16   2  -1   25.80    1.20
  16   2  -1   28.00    1.30
  14  -2  -1    1.70    0.20
  14  -2  -1    1.60    0.50
 -14  -2   1    1.60    0.40
  14  -2  -1    1.90    0.50
 -14  -2   1    1.70    0.40
  14  -2  -1    0.60    0.40
  14  -2  -1    1.70    0.30
 -14  -2   1    1.30    0.50
  14  -2  -1    1.20    0.20
  14  -2  -1    1.60    0.30
  14  -2  -1    2.30    0.40
  14  -2  -1    1.10    0.50
  14  -2  -1    1.70    0.20
  14  -2  -1    1.70    0.30
  14   2  -1    1.10    0.30
  14   2  -1    1.50    0.50
  14   2  -1    1.40    0.40
  14   2  -1    1.00    0.50
  14   2  -1    0.70    0.20
  14   2  -1    1.60    0.50
  14   2  -1    1.50    0.40
 -14   2   1    0.70    0.50
  14   2  -1    1.90    0.40
  14   2  -1    2.20    0.40
  14   2  -1    1.40    0.30
  12  -2  -1   34.20    1.20
 -12  -2   1   30.10    1.60
 -12  -2   1   32.40    1.40
  12  -2  -1   30.20    1.40
  12  -2  -1   32.70    1.20
  12  -2  -1   30.00    1.20
  12  -2  -1   30.50    1.50
  12  -2  -1   32.60    1.60
  12  -2  -1   31.90    1.30
 -12  -2   1   29.30    1.40
  12  -2  -1   31.90    1.50
  12  -2  -1   32.60    1.20
  12  -2  -1   32.80    1.20
  12  -2  -1   33.50    1.20
  12   2  -1   29.60    1.50
 -12   2   1   30.10    1.50
  12   2  -1   32.00    1.40
  12   2  -1   32.50    1.40
  12   2  -1   31.70    1.40
  12   2  -1   28.90    1.50
  12   2  -1   29.00    1.50
  12   2  -1   29.60    1.30
  12   2  -1   32.00    1.50
  10  -2  -1    7.00    0.40
  10  -2  -1    7.20    0.70
  10  -2  -1    8.20    0.50
  10  -2  -1    7.60    0.70
  10  -2  -1    7.80    0.60
  10  -2  -1    7.50    0.40
 -10  -2   1    7.30    0.70
  10  -2  -1    7.70    0.50
 -10  -2   1    7.40    0.50
 -10  -2   1    8.30    0.60
  10  -2  -1    7.30    0.40
  10  -2  -1    7.40    0.50
  10  -2  -1    8.60    0.40
  10   2  -1    7.10    0.40
  10   2  -1    7.50    0.60
 -10   2   1    7.30    0.70
  10   2  -1    7.50    0.60
  10   2  -1    8.00    0.70
  10   2  -1    7.50    0.70
   8  -2  -1   98.69    3.50
  -8  -2   1   99.59    3.70
   8  -2  -1   99.59    3.40
   8  -2  -1   94.69    3.50
   8  -2  -1   95.59    3.50
   8  -2  -1  101.09    3.50
  -8  -2   1   99.59    3.50
  -8  -2   1  100.19    3.40
   8   2  -1   95.29    3.60
   8   2  -1   89.79    3.70
   8   2  -1   93.39    3.50
   8   2  -1   97.79    3.50
   8   2  -1   91.49    3.50
   8   2  -1   98.49    3.30
  -6  -2   1  196.48    6.90
   6  -2  -1  195.58    6.80
  -6  -2   1  199.18    6.70
   6  -2  -1  197.78    6.90
   6  -2  -1  197.98    6.80
  -6  -2   1  195.98    6.90
  -6  -2   1  198.88    6.90
  -6  -2   1  194.48    7.00
   6   2  -1  210.68    6.90
   6   2  -1  187.88    6.90
   6   2  -1  193.38    7.00
   6   2  -1  196.98    7.10
   6   2  -1  197.08    6.90
   6   2  -1  191.38    6.80
   4  -2  -1  144.39    5.20
  -4  -2   1  145.89    5.20
  -4  -2   1  147.99    5.10
   4  -2  -1  142.99    5.10
   4  -2  -1  151.18    5.10
   4  -2  -1  153.08    5.10
  -4  -2   1  152.88    5.00
  -4  -2   1  154.48    5.10
   4  -2  -1  132.09    5.20
   4  -2  -1  146.99    5.10
   4   2  -1  145.99    5.20
   4   2  -1  141.09    5.20
   4   2  -1  143.09    5.00
   4   2  -1  146.69    5.20
   4   2  -1  142.09    5.10
  -2  -2   1  106.29    3.70
   2  -2  -1  106.99    3.80
   2  -2  -1   91.89    3.70
  -2  -2   1  110.09    3.80
  -2  -2   1  109.19    3.80
   2  -2  -1  110.89    3.80
   2  -2  -1  104.49    3.70
  -2  -2   1  104.99    3.70
   2  -2  -1  107.69    3.80
   2  -2  -1  106.49    3.80
  -2  -2   1  105.89    3.70
   2   2  -1  109.49    3.80
   2   2  -1  106.29    3.90
   2   2  -1  106.09    3.80
   2   2  -1  106.39    3.70
   2   2  -1  106.59    3.80
  -2   2   1  108.19    3.80
  -2   2   1  101.09    3.80
   2   2  -1  108.09    3.70
   0  -2  -1   98.89    3.60
   0  -2   1   98.89    3.50
   0  -2   1   96.79    3.60
   0  -2  -1   98.99    3.60
   0  -2  -1  100.79    3.60
   0  -2  -1   91.69    3.60
   0  -2   1  101.79    3.60
   0  -2   1  101.59    3.60
   0  -2   1  100.69    3.60
   0  -2  -1  102.49    3.50
   0  -2   1   98.49    3.60
   0  -2   1   98.29    3.50
   0  -2  -1   98.69    3.60
   0   2   1  105.09    3.60
   0   2   1  101.69    3.70
   0   2  -1   99.09    3.70
   0   2   1   98.89    3.60
   0   2  -1  101.09    3.60
   0   2   1  102.09    3.50
   2  -2   1  342.37   11.80
   2  -2   1  348.17   11.70
  -2  -2  -1  325.77   12.00
   2  -2   1  339.27   11.80
   2  -2   1  340.37   11.80
   2  -2   1  343.77   11.90
  -2  -2  -1  345.87   11.70
   2  -2   1  350.66   11.60
   2  -2   1  347.47   12.00
  -2  -2  -1  350.36   11.80
   2  -2   1  336.37   11.90
   2   2   1  341.57   11.80
   2   2   1  337.87   11.80
   2   2   1  331.97   11.90
   2   2   1  335.47   11.80
   2   2   1  345.27   11.50
   2   2   1  349.87   12.10
   4  -2   1  342.37   12.20
  -4  -2  -1  363.86   11.70
   4  -2   1  354.76   11.80
  -4  -2  -1  361.86   12.00
   4  -2   1  358.96   11.90
  -4  -2  -1  349.67   11.90
  -4  -2  -1  340.57   11.90
   4  -2   1  358.06   11.90
  -4  -2  -1  345.77   12.20
   4   2   1  331.67   11.60
   4   2   1  333.67   12.00
   4   2   1  339.47   11.90
   4   2   1  332.87   12.10
   4   2   1  345.77   12.00
   6  -2   1  210.58    7.00
  -6  -2  -1  197.88    7.20
   6  -2   1  205.58    7.00
   6  -2   1  208.78    6.90
   6  -2   1  196.88    7.20
   6  -2   1  206.28    7.00
   6  -2   1  201.18    6.90
   6  -2   1  196.78    7.00
  -6  -2  -1  206.18    6.80
  -6  -2  -1  202.98    7.00
   6  -2   1  201.18    6.90
   6   2   1  181.68    6.80
   6   2   1  201.48    7.10
   6   2   1  197.78    7.00
   6   2   1  192.58    7.00
   6   2   1  202.88    7.00
   8  -2   1   -0.10    0.30
  -8  -2  -1    0.20    0.20
  -8  -2  -1    0.30    0.20
   8  -2   1    0.20    0.10
   8  -2   1    0.70    0.10
   8  -2   1    0.30    0.30
   8  -2   1    0.50    0.30
  -8  -2  -1   -0.10    0.10
   8  -2   1    0.50    0.10
   8  -2   1    0.50    0.30
   8  -2   1    0.50    0.20
   8  -2   1    0.50    0.30
  -8  -2  -1    0.50    0.30
   8  -2   1    0.20    0.10
   8  -2   1    0.30    0.20
   8   2   1    0.20    0.20
   8   2   1    0.10    0.20
   8   2   1    0.60    0.30
   8   2   1    0.70    0.30
   8   2   1    0.00    0.10
   8   2   1    0.60    0.20
   8   2   1    0.70    0.20
   8   2   1   -0.10    0.20
   8   2   1    0.10    0.10
  10  -2   1    8.10    0.70
  10  -2   1    8.40    0.60
  10  -2   1    9.50    0.40
  10  -2   1    7.70    0.40
  10  -2   1    7.70    0.70
  10  -2   1    8.10    0.60
  10  -2   1    8.40    0.30
 -10  -2  -1    8.00    0.50
  10  -2   1    8.10    0.60
 -10  -2  -1    8.50    0.50
  10  -2   1    7.30    0.40
 -10  -2  -1    8.10    0.70
  10   2   1    6.10    0.60
  10   2   1    8.70    0.60
  10   2   1    7.30    0.60
  10   2   1    7.40    0.50
  10   2   1    6.70    0.70
  10   2   1    8.80    0.60
  10   2   1    7.50    0.70
 -12  -2  -1   76.49    2.80
  12  -2   1   78.79    2.90
 -12  -2  -1   74.89    3.00
 -12  -2  -1   73.69    3.00
  12  -2   1   78.19    3.10
  12  -2   1   76.99    3.00
  12  -2   1   71.69    2.70
  12  -2   1   71.49    2.80
  12  -2   1   75.59    2.90
  12  -2   1   76.79    3.00
 -12  -2  -1   82.79    2.90
  12  -2   1   72.69    2.60
  12   2   1   73.49    3.00
  12   2   1   74.69    2.80
  12   2   1   73.39    2.80
  12   2   1   68.09    2.80
  12   2   1   79.29    2.80
  12   2   1   75.49    2.80
  12   2   1   76.59    2.80
  12   2   1   76.29    3.10
  12   2   1   81.49    3.10
  12   2   1   80.79    2.90
  14  -2   1    4.30    0.30
  14  -2   1    3.80    0.60
 -14  -2  -1    4.50    0.50
  14  -2   1    4.00    0.60
 -14  -2  -1    5.00    0.70
 -14  -2  -1    3.70    0.60
  14  -2   1    5.10    0.70
 -14  -2  -1    5.30    0.50
  14  -2   1    4.10    0.60
  14  -2   1    4.10    0.30
  14   2   1    4.70    0.40
  14   2   1    5.10    0.60
  14   2   1    5.50    0.70
  14   2   1    4.60    0.40
  14   2   1    4.30    0.70
  14   2   1    5.30    0.50
  14   2   1    5.10    0.50
  14   2   1    3.90    0.60
 -14   2  -1    5.30    0.70
  14   2   1    4.40    0.60
  14   2   1    3.90    0.40
  14   2   1    4.70    0.40
  16  -2   1    5.30    0.30
  16  -2   1    5.90    0.70
  16  -2   1    6.40    0.30
  16  -2   1    5.50    0.40
  16  -2   1    5.30    0.80
  16  -2   1    5.50    0.40
  16  -2   1    6.20    0.70
 -16  -2  -1    5.90    0.60
 -16  -2  -1    5.30    0.80
  16  -2   1    8.60    0.70
  16  -2   1    5.80    0.60
 -16  -2  -1    6.80    0.60
 -16  -2  -1    6.30    0.80
  16  -2   1    6.30    0.70
  16   2   1    7.00    0.60
  16   2   1    5.30    0.70
  16   2   1    5.80    0.70
  16   2   1    6.80    0.50
  16   2   1    6.00    0.50
 -16   2  -1    7.80    0.90
  16   2   1    4.90    0.50
  16   2   1    6.30    0.50
  16   2   1    6.70    0.80
  16   2   1    5.70    0.80
  16   2   1    5.70    0.60
  16   2   1    6.40    0.50
  18  -2   1   10.20    0.80
  18  -2   1   10.50    1.00
 -18  -2  -1    9.00    1.00
  18  -2   1    9.50    0.90
  18  -2   1   10.50    0.50
 -18  -2  -1   11.50    0.80
 -18  -2  -1    9.70    1.10
  18  -2   1   10.60    1.00
  18  -2   1   10.60    0.90
  18  -2   1   10.00    0.50
  18  -2   1   10.80    0.60
  18  -2   1   10.10    0.60
  18  -2   1   10.00    1.00
 -18  -2  -1    9.90    0.80
  18   2   1   11.10    0.70
  18   2   1   10.40    0.70
  18   2   1    9.40    1.00
  18   2   1   11.00    0.70
 -18   2  -1    9.70    1.00
  18   2   1   11.30    0.90
  18   2   1   11.20    0.80
  18   2   1   11.80    0.80
  18   2   1   11.30    0.80
  18   2   1    8.10    1.00
 -18   2  -1   11.80    1.10
  18   2   1   11.20    1.10
  18   2   1   10.50    1.00
  20  -2   1   27.80    1.10
  20  -2   1   27.50    1.40
 -20  -2  -1   26.10    1.70
 -20  -2  -1   25.50    1.40
 -20  -2  -1   26.10    1.50
  20  -2   1   25.90    1.60
 -20  -2  -1   24.80    1.60
  20  -2   1   28.90    1.80
  20  -2   1   27.60    1.50
  20  -2   1   27.30    1.70
  20  -2   1   28.50    1.70
  20  -2   1   25.60    1.10
  20  -2   1   28.90    1.10
  20  -2   1   24.40    1.10
 -20   2  -1   28.50    1.60
 -20   2  -1   27.00    1.70
  20   2   1   29.10    1.80
  20   2   1   26.00    1.60
  20   2   1   26.10    1.30
  20   2   1   26.20    1.20
  20   2   1   27.20    1.70
  20   2   1   27.60    1.70
  20   2   1   26.30    1.30
  20   2   1   28.30    1.50
  20   2   1   27.60    1.20
 -22  -2  -1   12.60    1.00
  22  -2   1   11.50    1.00
  22  -2   1   12.80    1.20
  22  -2   1   11.30    0.70
  22  -2   1   13.40    1.20
  22  -2   1   11.60    1.30
 -22  -2  -1   12.20    1.10
  22  -2   1   12.30    0.70
  22  -2   1   11.70    0.70
  22  -2   1   12.90    1.30
  22  -2   1   12.10    1.00
 -22  -2  -1   13.00    1.40
  22  -2   1   12.20    0.70
 -22  -2  -1   11.00    1.30
 -22   2  -1   11.00    1.20
  22   2   1   13.20    1.30
  22   2   1   11.30    0.80
  22   2   1   11.80    1.20
  22   2   1   11.20    1.20
  22   2   1   13.40    1.30
  22   2   1   11.70    0.70
  22   2   1   10.50    0.90
  22   2   1   12.10    1.10
  22   2   1   12.50    0.90
 -22   2  -1    9.70    1.10
 -24  -2  -1    3.20    1.00
  24  -2   1    2.00    0.60
 -24  -2  -1    1.20    0.60
 -24  -2  -1    1.10    0.70
  24  -2   1    1.90    0.40
  24  -2   1    2.60    0.90
 -24  -2  -1    2.50    0.80
  24  -2   1    2.00    0.40
  24  -2   1    0.80    0.70
  24  -2   1    1.60    0.40
  24  -2   1    1.00    0.70
  24  -2   1    1.30    0.60
  24  -2   1    1.80    0.40
  24   2   1    1.60    0.50
 -24   2  -1    1.80    0.70
  24   2   1    2.80    1.00
  24   2   1    2.30    0.80
  24   2   1    4.00    1.00
  24   2   1    1.90    0.50
 -24   2  -1    1.60    0.80
  24   2   1    2.20    0.40
  24   2   1    2.10    0.80
  24   2   1    1.50    0.40
  24   2   1    2.00    0.60
 -26  -2  -1    0.40    0.60
 -26  -2  -1   -0.40    0.60
  26  -2   1    0.00    0.70
  26  -2   1    0.70    0.70
 -26  -2  -1   -1.00    0.90
  26  -2   1    0.20    0.40
  26  -2   1   -0.20    0.90
 -26  -2  -1    0.00    0.90
  26  -2   1    0.00    0.40
 -26   2  -1    0.80    0.80
  26   2   1    0.40    0.70
  26   2   1    0.10    0.30
  26   2   1    0.10    0.50
 -26   2  -1   -0.10    0.80
  26   2   1    0.60    0.80
  26   2   1    0.60    0.50
  26   2   1    0.50    0.30
  26   2   1    0.90    0.60
  26   2   1    0.30    0.90
  26   2   1    0.90    0.80
 -26   2  -1   -0.10    0.70
 -28  -2  -1    0.80    1.00
  28  -2   1    0.30    0.40
  28  -2   1    1.70    1.00
  28  -2   1    0.40    0.90
 -28  -2  -1    0.00    0.90
  28  -2   1    1.30    1.00
  28  -2   1    0.90    0.40
  28   2   1    0.10    0.80
  28   2   1   -0.80    0.80
 -28   2  -1   -0.60    0.90
 -28   2  -1    0.90    1.00
  28   2   1    0.00    0.50
  28   2   1    0.10    0.50
 -28   2  -1    0.20    0.80
  28   2   1    0.30    0.70
  28   2   1    1.10    0.80
  30  -2   1    2.90    0.60
  30  -2   1   -0.30    1.00
  30  -2   1    1.80    1.10
  30  -2   1    1.60    0.90
 -30  -2  -1    0.20    1.10
 -30  -2  -1    2.70    1.10
  30  -2   1    2.10    0.50
 -30   2  -1    1.60    0.90
 -30   2  -1    1.40    0.90
  30   2   1    2.50    1.00
  30   2   1    2.10    1.00
 -30   2  -1    2.50    1.00
  30   2   1    2.00    0.70
  30   2   1    0.90    1.00
  30   2   1    1.70    1.00
  30   2   1    0.80    0.60
 -32  -2  -1    1.00    1.10
  32  -2   1    0.00    0.50
  32  -2   1   -0.30    1.10
  32  -2   1    0.90    1.10
 -32  -2  -1   -1.00    0.80
  32  -2   1    1.00    1.00
  32  -2   1   -0.20    0.50
  32   2   1    0.50    1.10
 -32   2  -1   -1.60    0.90
  32   2   1    0.70    0.60
  32   2   1   -1.20    0.90
  32   2   1    0.70    1.20
 -32   2  -1    0.60    0.90
 -32   2  -1    0.20    1.00
  32   2   1   -0.20    0.60
 -32   2  -1    1.10    1.10
  32   2   1    1.00    1.00
 -33  -3   1    4.60    1.40
 -33  -3   1    3.30    1.40
  33  -3  -1    3.60    0.70
  33  -3  -1    4.60    1.40
  33  -3  -1    2.70    1.20
  33  -3  -1    2.40    0.70
  33  -3  -1    3.20    1.30
  33   3  -1    2.10    0.90
 -33   3   1    1.70    1.20
 -33   3   1    3.60    1.30
  33   3  -1    4.90    1.20
  33   3  -1    4.50    1.50
 -33   3   1    3.20    1.20
  33   3  -1    4.00    0.90
 -31  -3   1    2.30    1.20
  31  -3  -1    3.80    1.10
  31  -3  -1    2.20    0.60
 -31  -3   1    3.20    1.10
  31  -3  -1    3.40    1.20
  31  -3  -1    2.80    0.60
  31  -3  -1    3.00    1.20
  31   3  -1    4.20    1.20
 -31   3   1    2.10    1.10
 -31   3   1    2.60    1.20
  31   3  -1    3.10    1.20
  31   3  -1    4.60    0.80
  31   3  -1    2.40    0.40
  31   3  -1    3.30    1.10
 -31   3   1    2.60    1.00
  31   3  -1    1.70    0.70
  29  -3  -1    0.90    0.50
  29  -3  -1    0.20    0.50
  29  -3  -1    1.60    0.90
 -29  -3   1    0.10    1.10
  29  -3  -1    0.60    0.90
 -29  -3   1   -0.20    0.90
  29  -3  -1    1.10    1.00
  29   3  -1    1.20    0.70
  29   3  -1    1.30    0.50
  29   3  -1   -0.70    1.00
  29   3  -1    1.10    0.90
  29   3  -1    1.80    1.00
  29   3  -1    1.00    0.70
 -29   3   1    0.30    1.00
  29   3  -1   -0.20    0.90
 -29   3   1    1.40    0.90
 -27  -3   1   19.10    1.40
 -27  -3   1   21.00    1.80
  27  -3  -1   20.70    1.80
  27  -3  -1   20.90    1.60
 -27  -3   1   20.70    1.90
  27  -3  -1   22.40    1.20
  27  -3  -1   19.70    1.10
  27  -3  -1   20.60    1.90
  27   3  -1   17.00    1.80
  27   3  -1   20.00    1.90
  27   3  -1   18.40    1.80
  27   3  -1   18.60    1.30
  27   3  -1   20.40    1.80
 -27   3   1   18.90    1.70
  27   3  -1   18.30    1.20
 -27   3   1   18.10    1.70
  27   3  -1   20.50    1.40
 -25  -3   1    2.40    0.80
 -25  -3   1    2.60    0.80
 -25  -3   1    1.70    1.00
 -25  -3   1    3.00    0.90
  25  -3  -1    3.30    0.90
  25  -3  -1    2.10    0.50
  25  -3  -1    3.10    1.00
  25  -3  -1    3.60    0.90
  25  -3  -1    3.60    0.60
  25   3  -1    2.50    0.60
  25   3  -1    2.10    0.90
  25   3  -1    2.30    0.80
  25   3  -1    3.40    0.90
  25   3  -1    3.70    1.00
 -25   3   1    1.60    0.90
  25   3  -1    3.00    0.60
  25   3  -1    1.90    0.60
 -25   3   1    0.50    0.90
  25   3  -1    3.60    0.70
  23  -3  -1   10.40    1.30
  23  -3  -1   12.40    1.30
 -23  -3   1   11.80    1.10
 -23  -3   1    9.00    1.00
  23  -3  -1   11.50    0.80
 -23  -3   1    9.60    1.20
  23  -3  -1    8.80    0.70
 -23  -3   1   10.40    1.30
  23  -3  -1    8.50    1.20
  23  -3  -1   10.00    1.10
  23   3  -1   10.00    0.80
  23   3  -1   10.70    1.20
  23   3  -1    8.30    0.90
  23   3  -1   10.50    1.20
  23   3  -1   11.10    1.00
 -23   3   1    9.50    1.20
  23   3  -1   11.60    1.40
  23   3  -1    9.70    0.90
 -23   3   1    8.30    1.10
  23   3  -1    9.30    1.20
 -21  -3   1    1.40    0.80
  21  -3  -1    1.50    0.70
  21  -3  -1    2.00    0.40
  21  -3  -1    1.90    0.40
  21  -3  -1    1.40    0.40
  21  -3  -1    4.60    1.00
 -21  -3   1    1.10    0.60
  21  -3  -1    1.50    0.70
  21  -3  -1    1.60    0.80
  21  -3  -1    1.50    0.40
 -21  -3   1    0.90    0.60
 -21  -3   1    0.60    0.60
  21  -3  -1    1.60    0.50
  21   3  -1    0.70    0.40
 -21   3   1    1.20    0.70
  21   3  -1    2.90    0.90
  21   3  -1    1.70    0.50
  21   3  -1    0.90    0.50
  21   3  -1    1.30    0.70
  21   3  -1    2.10    0.60
  21   3  -1    0.70    0.70
 -21   3   1    1.20    0.80
  21   3  -1    1.60    0.50
  21   3  -1    1.60    0.70
  19  -3  -1   16.40    0.90
  19  -3  -1   15.80    0.70
 -19  -3   1   15.50    1.30
  19  -3  -1   17.40    1.30
 -19  -3   1   16.50    1.10
  19  -3  -1   15.60    0.90
  19  -3  -1   16.60    0.90
  19  -3  -1   17.00    1.20
  19  -3  -1   17.40    1.30
  19  -3  -1   17.90    1.00
 -19  -3   1   17.00    1.10
  19  -3  -1   18.40    0.80
  19  -3  -1   17.80    1.30
  19  -3  -1   17.00    0.90
  19   3  -1   18.10    1.30
  19   3  -1   17.30    1.10
  19   3  -1   16.90    1.30
 -19   3   1   14.90    1.30
 -19   3   1   17.60    1.30
  19   3  -1   18.20    1.40
  19   3  -1   16.20    1.00
 -17  -3   1   18.10    1.10
  17  -3  -1   17.60    1.30
  17  -3  -1   19.80    1.20
  17  -3  -1   17.40    0.80
  17  -3  -1   19.80    0.90
 -17  -3   1   19.90    1.10
  17  -3  -1   18.10    1.30
  17  -3  -1   17.40    0.90
 -17  -3   1   18.20    1.40
  17  -3  -1   18.50    1.20
  17  -3  -1   18.60    0.90
  17   3  -1   19.50    1.30
  17   3  -1   19.80    1.10
  17   3  -1   19.20    1.10
  17   3  -1   20.60    1.10
  17   3  -1   18.20    1.30
 -17   3   1   19.80    1.30
  17   3  -1   20.10    1.30
  17   3  -1   20.30    1.10
  15  -3  -1    1.40    0.30
  15  -3  -1    2.20    0.30
  15  -3  -1    1.30    0.50
  15  -3  -1    2.50    0.50
  15  -3  -1    2.30    0.40
 -15  -3   1    2.00    0.50
  15  -3  -1    1.70    0.30
 -15  -3   1    2.00    0.50
 -15  -3   1    1.60    0.40
  15  -3  -1    1.80    0.30
  15  -3  -1    2.00    0.60
  15  -3  -1    1.70    0.60
  15  -3  -1    2.40    0.30
 -15  -3   1    2.20    0.40
  15  -3  -1    2.40    0.30
  15   3  -1    2.10    0.50
  15   3  -1    1.70    0.60
  15   3  -1    1.50    0.50
 -15   3   1    1.60    0.50
  15   3  -1    2.60    0.50
  15   3  -1    1.60    0.40
  15   3  -1    1.90    0.40
  15   3  -1    2.70    0.50
  15   3  -1    2.00    0.60
  13  -3  -1   55.09    2.00
  13  -3  -1   49.99    2.00
  13  -3  -1   54.39    2.00
 -13  -3   1   54.89    2.10
  13  -3  -1   49.99    2.20
  13  -3  -1   52.09    2.30
 -13  -3   1   52.89    2.10
  13  -3  -1   53.29    2.00
  13  -3  -1   49.99    2.00
  13  -3  -1   51.69    2.00
 -13  -3   1   49.40    2.30
 -13  -3   1   53.29    2.30
  13  -3  -1   48.70    2.20
  13  -3  -1   54.49    2.30
 -13   3   1   51.89    2.20
  13   3  -1   58.39    2.20
  13   3  -1   52.79    2.10
  13   3  -1   51.49    2.30
  13   3  -1   52.79    1.90
  13   3  -1   51.09    2.20
  13   3  -1   52.59    2.20
  13   3  -1   52.79    2.30
  13   3  -1   53.59    1.90
  11  -3  -1   57.99    2.50
  11  -3  -1   60.19    2.50
  11  -3  -1   61.39    2.20
 -11  -3   1   58.79    2.30
 -11  -3   1   59.19    2.40
  11  -3  -1   60.19    2.40
  11  -3  -1   63.39    2.30
 -11  -3   1   61.59    2.30
  11  -3  -1   56.19    2.20
  11  -3  -1   59.39    2.20
  11  -3  -1   62.39    2.30
  11  -3  -1   56.59    2.30
  11  -3  -1   59.79    2.40
 -11  -3   1   57.79    2.50
  11   3  -1   57.59    2.40
  11   3  -1   62.09    2.20
  11   3  -1   58.99    2.50
  11   3  -1   58.29    2.30
  11   3  -1   54.79    2.40
  11   3  -1   65.79    2.40
  11   3  -1   59.49    2.50
  11   3  -1   59.39    2.20
   9  -3  -1   60.99    2.40
  -9  -3   1   67.79    2.50
   9  -3  -1   69.69    2.50
   9  -3  -1   66.79    2.50
   9  -3  -1   67.19    2.40
  -9  -3   1   64.79    2.60
   9  -3  -1   64.59    2.60
   9  -3  -1   63.69    2.40
   9  -3  -1   65.89    2.50
   9  -3  -1   64.29    2.60
  -9  -3   1   62.59    2.60
  -9  -3   1   67.69    2.40
   9   3  -1   70.99    2.60
   9   3  -1   65.59    2.60
   9   3  -1   62.09    2.60
   9   3  -1   65.89    2.70
   9   3  -1   64.59    2.60
   9   3  -1   63.89    2.50
  -7  -3   1  312.27   10.40
  -7  -3   1  270.37   10.60
   7  -3  -1  258.27   10.50
  -7  -3   1  297.17   10.40
   7  -3  -1  313.57    9.90
   7  -3  -1  306.47   10.20
  -7  -3   1  314.57   10.10
   7  -3  -1  320.87   10.30
   7   3  -1  296.07   10.40
   7   3  -1  291.07   10.50
   7   3  -1  293.27   10.10
   7   3  -1  296.57   10.30
   7   3  -1  291.57   10.40
   5  -3  -1  159.98    5.70
   5  -3  -1  169.18    5.80
  -5  -3   1  159.18    5.70
  -5  -3   1  166.38    5.80
   5  -3  -1  157.58    5.70
   5  -3  -1  163.08    5.80
   5  -3  -1  161.48    5.90
   5  -3  -1  163.88    5.70
   5  -3  -1  156.18    5.70
  -5  -3   1  167.78    5.60
  -5  -3   1  164.78    5.70
   5   3  -1  162.78    5.60
   5   3  -1  160.78    5.80
   5   3  -1  164.08    5.80
   5   3  -1  152.98    5.70
   5   3  -1  162.88    5.80
   3  -3  -1  462.95   16.40
  -3  -3   1  463.15   16.20
  -3  -3   1  484.15   16.60
  -3  -3   1  482.95   16.50
   3  -3  -1  467.35   16.20
   3  -3  -1  464.35   16.40
  -3  -3   1  488.25   16.50
  -3  -3   1  478.75   16.30
   3  -3  -1  475.15   16.30
   3  -3  -1  470.65   16.60
  -3  -3   1  468.75   16.00
   3  -3  -1  481.15   16.50
  -3  -3   1  490.55   16.40
   3   3  -1  472.05   16.60
   3   3  -1  462.25   16.50
   3   3  -1  470.25   16.40
   3   3  -1  487.55   16.90
   3   3  -1  473.35   16.60
   3   3  -1  470.05   16.00
  -3   3   1  488.35   16.40
  -3   3   1  484.05   16.80
  -1  -3   1  951.80   32.90
  -1  -3   1  950.10   32.40
   1  -3  -1  943.81   33.10
   1  -3  -1  944.21   32.90
  -1  -3   1  975.20   33.30
   1  -3  -1  945.81   32.50
   1  -3  -1  974.90   32.50
  -1  -3   1  965.90   32.50
   1  -3  -1  947.81   33.00
  -1  -3   1  968.20   33.10
   1  -3  -1  978.20   33.30
  -1  -3   1  930.21   33.00
  -1   3   1  964.10   32.00
   1   3  -1  958.20   33.30
   1   3  -1  962.00   33.80
   1   3  -1  969.60   32.00
   1   3  -1  935.01   33.00
  -1   3   1  983.30   32.90
   1   3  -1  973.00   32.90
  -1   3   1  981.00   33.80
  -1   3   1  947.71   33.00
   1  -3   1 1569.54   55.19
  -1  -3  -1 1659.93   55.89
  -1  -3  -1 1599.54   54.59
  -1  -3  -1 1537.55   55.39
   1  -3   1 1662.13   55.69
   1  -3   1 1647.34   54.69
   1  -3   1 1695.73   55.39
  -1  -3  -1 1625.44   55.59
   1  -3   1 1635.14   55.89
   1  -3   1 1648.54   56.19
  -1  -3  -1 1628.84   55.29
  -1  -3  -1 1540.55   56.09
   1  -3   1 1646.84   54.69
   1   3   1 1627.34   53.79
   1   3   1 1632.94   56.79
   1   3   1 1580.64   55.39
  -1   3  -1 1585.44   55.19
   1   3   1 1603.94   55.29
   1   3   1 1603.84   55.89
  -1   3  -1 1610.14   56.79
   3  -3   1   17.10    0.90
  -3  -3  -1   18.50    0.90
  -3  -3  -1   17.40    0.90
   3  -3   1   18.30    0.90
   3  -3   1   17.20    0.90
   3  -3   1   18.30    0.90
   3  -3   1   18.90    0.90
   3  -3   1   19.30    0.80
  -3  -3  -1   19.00    0.90
   3  -3   1   17.00    0.90
   3  -3   1   17.30    0.90
  -3  -3  -1   17.40    0.80
   3   3   1   16.70    0.90
   3   3   1   19.00    0.90
   3   3   1   17.40    0.90
   3   3   1   17.90    0.90
   3   3   1   18.60    1.00
   3   3   1   16.60    0.90
  -5  -3  -1  182.28    6.30
  -5  -3  -1  176.08    6.40
  -5  -3  -1  183.18    6.20
   5  -3   1  170.38    6.20
   5  -3   1  177.68    6.20
   5  -3   1  180.58    6.10
   5  -3   1  180.28    6.40
   5  -3   1  164.88    6.40
   5  -3   1  183.78    6.00
  -5  -3  -1  181.58    6.00
  -5  -3  -1  175.58    6.20
   5  -3   1  177.28    6.20
   5   3   1  183.28    6.30
   5   3   1  177.58    6.30
   5   3   1  179.68    6.30
   5   3   1  176.48    6.10
   5   3   1  149.29    6.40
   5   3   1  177.38    6.30
   5   3   1  174.78    6.20
   7  -3   1    2.20    0.30
   7  -3   1    2.70    0.30
   7  -3   1    1.90    0.30
  -7  -3  -1    1.60    0.40
   7  -3   1    1.10    0.30
  -7  -3  -1    2.20    0.40
   7  -3   1    2.30    0.30
  -7  -3  -1    2.50    0.30
  -7  -3  -1    2.10    0.40
  -7  -3  -1    2.80    0.30
  -7  -3  -1    0.50    0.30
   7   3   1    2.00    0.40
   7   3   1    1.80    0.40
   7   3   1    1.10    0.40
   7   3   1    2.20    0.40
   7   3   1    1.60    0.40
  -9  -3  -1   47.80    1.80
   9  -3   1   45.90    1.90
   9  -3   1   47.80    1.80
   9  -3   1   47.10    1.80
   9  -3   1   49.50    1.80
  -9  -3  -1   45.70    2.00
   9  -3   1   46.30    1.90
  -9  -3  -1   45.90    2.00
  -9  -3  -1   49.00    1.70
   9  -3   1   43.90    2.00
   9  -3   1   44.80    1.80
   9  -3   1   47.90    1.80
   9  -3   1   45.50    1.80
  -9  -3  -1   45.00    2.00
   9  -3   1   45.40    2.00
   9   3   1   50.29    1.90
   9   3   1   45.90    1.70
   9   3   1   47.00    1.90
   9   3   1   43.70    1.90
   9   3   1   44.40    2.00
   9   3   1   44.10    1.90
   9   3   1   44.60    2.00
   9   3   1   48.60    1.70
 -11  -3  -1   17.40    0.90
  11  -3   1   20.00    0.80
  11  -3   1   17.20    0.80
  11  -3   1   17.90    0.80
  11  -3   1   19.50    0.80
  11  -3   1   17.50    0.80
 -11  -3  -1   18.70    0.90
  11  -3   1   18.20    1.10
 -11  -3  -1   18.00    1.10
  11  -3   1   19.30    1.10
  11  -3   1   19.40    1.00
  11  -3   1   16.90    0.80
 -11  -3  -1   18.50    1.10
  11   3   1   19.60    0.80
  11   3   1   19.40    1.00
  11   3   1   17.50    0.70
  11   3   1   17.50    1.00
  11   3   1   18.30    1.10
  11   3   1   19.30    1.00
  11   3   1   17.70    1.10
  13  -3   1   77.29    3.10
  13  -3   1   77.59    3.20
  13  -3   1   80.69    3.10
  13  -3   1   76.79    2.80
  13  -3   1   74.29    2.90
  13  -3   1   80.79    2.90
 -13  -3  -1   75.89    3.20
  13  -3   1   79.49    3.20
 -13  -3  -1   80.69    2.90
 -13  -3  -1   80.29    3.00
  13  -3   1   77.29    2.80
  13  -3   1   78.99    3.10
  13  -3   1   83.49    2.90
  13   3   1   77.59    3.30
  13   3   1   77.89    3.20
  13   3   1   86.99    3.10
  13   3   1   66.19    3.00
  13   3   1   84.29    3.10
  13   3   1   83.59    3.00
  15  -3   1    7.30    0.80
  15  -3   1    7.20    0.40
  15  -3   1    6.80    0.50
 -15  -3  -1    7.60    0.80
 -15  -3  -1    8.30    0.70
  15  -3   1    7.20    0.50
  15  -3   1    7.40    0.80
 -15  -3  -1    8.20    0.60
  15  -3   1    7.40    0.40
  15  -3   1    8.50    0.80
  15  -3   1    8.00    0.80
  15   3   1    7.30    0.70
  15   3   1   10.20    0.80
  15   3   1    3.80    0.60
  15   3   1    8.70    0.90
  15   3   1    7.80    0.70
  15   3   1    8.90    0.70
 -15   3  -1    8.20    0.90
  15   3   1    7.80    0.60
  17  -3   1   30.60    1.20
  17  -3   1   30.70    1.30
  17  -3   1   30.40    1.30
  17  -3   1   30.30    1.70
  17  -3   1   29.00    1.60
 -17  -3  -1   31.50    1.40
  17  -3   1   30.00    1.70
  17  -3   1   29.80    1.50
  17  -3   1   29.70    1.20
 -17  -3  -1   31.60    1.50
  17  -3   1   29.80    1.70
 -17  -3  -1   28.60    1.70
  17   3   1   33.00    1.50
  17   3   1   28.00    1.70
  17   3   1   30.60    1.70
  17   3   1   33.40    1.50
  17   3   1   27.00    1.70
 -17   3  -1   32.90    1.70
  17   3   1   32.00    1.40
  17   3   1   30.50    1.60
 -19  -3  -1   18.70    1.40
  19  -3   1   16.40    1.20
  19  -3   1   16.20    1.30
  19  -3   1   16.40    1.30
 -19  -3  -1   15.90    1.00
  19  -3   1   18.30    0.80
  19  -3   1   17.10    1.10
  19  -3   1   17.70    1.30
  19  -3   1   16.30    0.80
  19  -3   1   18.80    0.80
 -19  -3  -1   16.80    1.00
  19  -3   1   15.60    0.80
 -19  -3  -1   10.00    1.20
  19   3   1   14.60    1.00
  19   3   1   17.40    1.30
  19   3   1   17.00    1.30
  19   3   1   11.80    0.90
 -19   3  -1   15.50    1.30
  19   3   1   14.80    0.90
  19   3   1   16.00    1.40
  19   3   1   17.70    1.20
  19   3   1   16.30    1.00
 -21  -3  -1   75.19    3.30
  21  -3   1   80.19    3.30
  21  -3   1   74.19    3.40
  21  -3   1   72.49    3.20
  21  -3   1   75.59    3.40
 -21  -3  -1   72.79    3.00
  21  -3   1   72.89    2.80
  21  -3   1   72.49    2.80
  21  -3   1   77.99    3.20
 -21  -3  -1   73.99    3.10
  21  -3   1   77.19    2.80
  21  -3   1   78.49    2.80
 -21  -3  -1   71.99    3.40
 -21   3  -1   71.09    3.20
  21   3   1   73.09    3.40
 -21   3  -1   69.79    3.30
  21   3   1   75.09    3.00
  21   3   1   76.19    3.10
  21   3   1   79.29    2.90
  21   3   1   72.59    3.00
  21   3   1   71.39    2.90
  21   3   1   75.39    3.50
  21   3   1   73.69    3.40
  21   3   1   73.79    3.40
  23  -3   1    9.50    0.70
 -23  -3  -1   12.60    1.30
  23  -3   1    9.30    1.10
  23  -3   1    9.70    1.30
  23  -3   1    9.90    1.20
  23  -3   1   12.50    1.00
  23  -3   1    9.60    0.70
 -23  -3  -1   11.20    1.00
  23  -3   1   11.20    0.70
 -23  -3  -1   10.30    1.30
 -23  -3  -1   12.50    1.10
  23  -3   1   10.50    1.30
  23  -3   1   11.50    0.70
  23   3   1    9.90    0.90
  23   3   1   11.80    1.30
  23   3   1   11.20    0.90
  23   3   1   11.60    0.80
  23   3   1   12.70    1.40
  23   3   1   11.50    1.10
 -23   3  -1   12.40    1.30
  23   3   1   12.90    1.40
  23   3   1    9.50    0.80
  23   3   1    9.00    1.20
 -23   3  -1    8.90    1.20
  25  -3   1    6.10    0.60
  25  -3   1    6.80    1.20
  25  -3   1    5.60    0.60
  25  -3   1    7.80    1.20
 -25  -3  -1    6.10    1.10
 -25  -3  -1    7.40    0.90
 -25  -3  -1    6.30    1.20
  25  -3   1    6.30    1.10
  25   3   1    6.80    1.10
 -25   3  -1    6.00    1.00
  25   3   1    5.40    0.80
  25   3   1    5.40    0.60
  25   3   1    7.80    1.30
  25   3   1    5.90    0.80
  25   3   1    6.30    1.10
  25   3   1    6.30    1.00
 -25   3  -1    3.50    1.10
  25   3   1    5.20    0.90
  27  -3   1   27.10    1.90
  27  -3   1   23.80    1.80
 -27  -3  -1   26.70    2.00
  27  -3   1   24.90    1.20
  27  -3   1   22.60    1.80
 -27  -3  -1   27.00    2.10
  27  -3   1   25.40    1.30
  27   3   1   26.80    2.00
  27   3   1   22.00    2.00
  27   3   1   27.20    1.60
 -27   3  -1   26.50    1.80
  27   3   1   25.40    2.10
  27   3   1   22.90    1.20
  27   3   1   25.70    1.60
 -27   3  -1   21.80    1.90
  27   3   1   26.30    1.50
  27   3   1   27.20    2.00
  29  -3   1    0.60    0.40
  29  -3   1    0.30    1.00
  29  -3   1    0.60    0.80
 -29  -3  -1   -0.80    0.90
  29  -3   1   -0.90    0.40
  29  -3   1    0.30    1.00
 -29  -3  -1    0.30    0.90
 -29   3  -1   -0.30    0.90
  29   3   1   -0.20    0.60
  29   3   1    0.10    1.10
 -29   3  -1    0.30    0.80
  29   3   1    0.00    0.30
  29   3   1    1.20    0.60
  29   3   1    1.60    0.80
  31  -3   1    0.80    0.90
  31  -3   1    0.90    0.50
 -31  -3  -1   -1.30    1.10
  31  -3   1    0.40    0.50
  31  -3   1    1.60    0.90
 -31  -3  -1    1.70    1.10
  31  -3   1    2.30    1.00
  31   3   1    0.40    0.70
 -31   3  -1   -0.30    1.00
  31   3   1    0.50    1.20
 -31   3  -1   -0.10    0.80
  31   3   1    1.70    1.00
  31   3   1    1.60    0.70
 -31   3  -1    2.50    1.10
  32  -4  -1   -1.40    0.80
 -32  -4   1   -1.30    1.10
  32  -4  -1   -0.40    1.10
  32  -4  -1    0.10    1.00
  32  -4  -1   -0.20    0.60
 -32  -4   1    0.50    1.00
  32  -4  -1    0.30    0.60
  32   4  -1   -0.30    0.70
 -32   4   1   -1.20    0.80
  32   4  -1   -1.90    0.60
  32   4  -1   -1.50    0.90
 -32   4   1    0.30    0.90
  32   4  -1   -0.20    0.50
  32   4  -1    0.50    1.00
  30  -4  -1    6.60    0.80
 -30  -4   1    7.80    1.40
  30  -4  -1    7.70    1.30
  30  -4  -1    5.20    1.10
 -30  -4   1    5.00    1.20
  30  -4  -1    3.80    1.10
  30  -4  -1    5.80    0.70
  30   4  -1    6.10    1.20
  30   4  -1    5.90    1.20
  30   4  -1    5.00    0.90
 -30   4   1    7.20    1.40
 -30   4   1    6.30    1.20
  30   4  -1    5.40    0.70
  30   4  -1    6.60    1.00
  28  -4  -1    2.60    0.60
 -28  -4   1    2.00    1.10
  28  -4  -1    0.90    0.90
  28  -4  -1    3.70    1.00
  28  -4  -1    3.10    1.00
  28  -4  -1    2.10    0.60
 -28  -4   1    2.00    1.00
  28   4  -1    3.00    0.60
  28   4  -1    3.70    1.10
  28   4  -1    3.00    0.80
 -28   4   1    2.70    1.10
  28   4  -1    2.70    1.00
  28   4  -1    1.90    0.70
 -28   4   1    2.00    1.10
  26  -4  -1    5.70    0.70
  26  -4  -1    6.60    1.20
  26  -4  -1    6.00    1.20
  26  -4  -1    5.30    0.70
 -26  -4   1    5.70    1.20
 -26  -4   1    7.10    1.20
  26  -4  -1    5.90    1.10
  26   4  -1    6.40    0.90
  26   4  -1    6.70    1.20
  26   4  -1    6.90    1.10
 -26   4   1    4.50    1.20
 -26   4   1    3.00    1.10
  26   4  -1    5.20    0.80
  26   4  -1    5.70    0.80
  26   4  -1    6.70    1.00
 -24  -4   1   27.30    2.00
  24  -4  -1   31.70    1.50
  24  -4  -1   31.00    1.90
 -24  -4   1   33.20    1.70
  24  -4  -1   30.00    2.00
  24  -4  -1   33.50    2.00
  24  -4  -1   31.10    2.20
 -24  -4   1   28.10    1.90
  24  -4  -1   30.10    1.50
  24   4  -1   27.60    1.60
  24   4  -1   32.20    1.80
  24   4  -1   31.10    1.70
 -24   4   1   31.40    2.10
  24   4  -1   30.20    1.60
 -24   4   1   27.20    2.00
  24   4  -1   30.50    2.00
  24   4  -1   30.10    2.00
  22  -4  -1   -0.10    0.80
  22  -4  -1    1.80    0.80
  22  -4  -1    0.00    1.00
 -22  -4   1    2.30    0.80
  22  -4  -1    1.60    0.50
 -22  -4   1    0.60    0.60
  22  -4  -1    0.30    0.40
  22  -4  -1    0.60    0.70
 -22  -4   1    2.90    1.00
 -22  -4   1    1.50    0.60
  22   4  -1    0.80    0.60
  22   4  -1    1.20    0.60
 -22   4   1    1.40    0.90
  22   4  -1    0.50    0.50
  22   4  -1    0.40    0.70
 -22   4   1   -0.20    0.70
  22   4  -1    1.20    0.70
  22   4  -1    1.50    0.80
 -20  -4   1    2.30    0.60
  20  -4  -1    2.20    0.70
  20  -4  -1    1.60    0.30
 -20  -4   1    1.70    0.50
  20  -4  -1    1.80    0.70
  20  -4  -1    2.10    0.90
 -20  -4   1    2.40    0.80
  20  -4  -1    2.20    0.50
 -20  -4   1    2.30    0.80
  20  -4  -1    2.30    0.40
  20  -4  -1    1.60    0.30
  20  -4  -1    2.60    0.40
  20  -4  -1    2.10    0.50
  20  -4  -1    2.90    0.80
 -20   4   1    1.20    0.80
  20   4  -1    2.00    0.60
  20   4  -1    1.40    0.60
  20   4  -1    1.70    0.80
  20   4  -1    1.80    0.60
  20   4  -1    2.20    0.80
  20   4  -1    2.00    0.50
 -20   4   1    2.60    0.90
 -18  -4   1   10.50    1.10
  18  -4  -1   11.10    0.80
  18  -4  -1    8.50    0.70
  18  -4  -1   10.50    0.60
  18  -4  -1    9.70    0.80
  18  -4  -1    9.40    1.10
 -18  -4   1    9.60    0.80
 -18  -4   1   11.20    1.20
  18  -4  -1   10.00    1.10
  18  -4  -1   11.20    0.70
  18  -4  -1   10.60    1.00
  18  -4  -1   10.90    1.00
 -18  -4   1   10.30    0.80
  18   4  -1    9.70    0.90
  18   4  -1   12.00    1.10
 -18   4   1    8.80    1.00
  18   4  -1   11.80    1.10
  18   4  -1   11.30    0.90
 -16  -4   1    4.20    0.50
  16  -4  -1    4.20    0.50
  16  -4  -1    3.70    0.50
  16  -4  -1    4.30    0.60
  16  -4  -1    3.30    0.50
  16  -4  -1    4.30    0.70
 -16  -4   1    2.60    0.50
  16  -4  -1    4.90    0.80
 -16  -4   1    4.30    0.70
  16  -4  -1    3.50    0.40
  16  -4  -1    4.20    0.50
  16  -4  -1    3.20    0.40
  16  -4  -1    4.60    0.70
 -16  -4   1    3.50    0.70
 -16   4   1    2.70    0.80
  16   4  -1    3.60    0.70
  16   4  -1    3.10    0.70
  16   4  -1    3.80    0.30
  16   4  -1    1.80    0.50
  16   4  -1    3.50    0.60
  16   4  -1    4.20    0.60
  16   4  -1    4.10    0.30
  16   4  -1    4.00    0.60
  14  -4  -1    2.00    0.60
  14  -4  -1    2.30    0.50
 -14  -4   1    2.30    0.60
  14  -4  -1    1.60    0.40
 -14  -4   1    2.00    0.40
 -14  -4   1    2.40    0.60
  14  -4  -1    1.90    0.60
  14  -4  -1    3.10    0.40
 -14  -4   1    2.40    0.60
  14  -4  -1    2.10    0.40
  14  -4  -1    2.20    0.40
  14  -4  -1    2.90    0.60
  14  -4  -1    2.00    0.40
 -14  -4   1    3.00    0.50
  14  -4  -1    2.80    0.40
  14   4  -1    2.50    0.30
  14   4  -1    2.20    0.50
  14   4  -1    2.10    0.50
  14   4  -1    1.40    0.50
  14   4  -1    2.20    0.70
  14   4  -1    2.70    0.30
  14   4  -1    2.30    0.50
 -14   4   1    1.80    0.70
  14   4  -1    2.40    0.60
  12  -4  -1    9.30    0.70
  12  -4  -1   11.60    0.70
 -12  -4   1    9.90    0.70
  12  -4  -1   11.10    0.80
  12  -4  -1    9.70    0.70
  12  -4  -1   10.90    0.70
  12  -4  -1    9.70    0.80
  12  -4  -1   10.60    0.70
  12  -4  -1   11.10    0.90
  12  -4  -1    9.70    0.70
 -12  -4   1   10.30    0.90
 -12  -4   1   10.10    0.90
 -12  -4   1   11.20    0.70
  12   4  -1   10.00    0.70
  12   4  -1   11.50    0.80
  12   4  -1    9.60    0.90
  12   4  -1   11.80    0.80
  12   4  -1    9.40    0.90
  12   4  -1    9.70    0.80
  12   4  -1   10.90    0.90
  12   4  -1   10.90    0.70
  10  -4  -1  223.88    7.60
 -10  -4   1  211.78    7.90
 -10  -4   1  222.18    7.40
 -10  -4   1  220.18    7.60
 -10  -4   1  210.68    7.70
 -10  -4   1  224.88    7.70
  10  -4  -1  183.38    7.80
  10  -4  -1  213.48    7.90
  10  -4  -1  224.48    7.70
  10  -4  -1  228.18    7.60
  10  -4  -1  217.18    7.70
  10   4  -1  209.88    7.80
  10   4  -1  209.58    7.70
  10   4  -1  204.98    7.70
  10   4  -1  213.28    8.00
  10   4  -1  218.38    7.70
  -8  -4   1   12.60    0.70
  -8  -4   1   12.00    0.80
  -8  -4   1   14.40    0.70
   8  -4  -1   14.00    0.80
  -8  -4   1   12.80    0.90
   8  -4  -1   12.50    0.90
   8  -4  -1   10.70    0.80
   8  -4  -1   11.40    0.80
  -8  -4   1   13.10    0.90
   8  -4  -1   12.70    0.90
  -8  -4   1   13.90    0.90
   8  -4  -1   13.50    0.80
   8  -4  -1   12.20    0.80
   8  -4  -1   11.80    0.90
   8  -4  -1   13.30    0.60
   8   4  -1   13.30    0.90
   8   4  -1   13.40    0.90
   8   4  -1   13.10    0.90
   8   4  -1   13.30    0.90
   8   4  -1   14.30    0.80
   6  -4  -1   12.10    0.80
   6  -4  -1   11.10    0.80
   6  -4  -1   11.10    0.90
   6  -4  -1   10.30    0.70
  -6  -4   1   11.40    0.80
   6  -4  -1   11.60    0.70
  -6  -4   1   11.00    0.60
  -6  -4   1   11.90    0.60
   6  -4  -1   12.10    0.80
  -6  -4   1   10.00    0.70
   6  -4  -1   10.50    0.80
   6  -4  -1   12.10    0.80
  -6  -4   1   11.20    0.80
   6   4  -1   10.30    0.80
   6   4  -1   10.30    0.70
   6   4  -1    8.50    0.80
   6   4  -1   11.10    0.80
  -6   4   1   11.00    0.60
   6   4  -1   10.20    0.70
   6   4  -1   11.30    0.80
   6   4  -1   11.60    0.80
   4  -4  -1   73.09    2.80
  -4  -4   1   71.99    2.80
   4  -4  -1   73.49    2.70
  -4  -4   1   73.69    2.80
  -4  -4   1   73.59    2.70
   4  -4  -1   69.89    2.80
  -4  -4   1   75.99    2.90
   4  -4  -1   73.79    2.80
  -4  -4   1   72.69    2.70
   4  -4  -1   71.29    2.80
   4   4  -1   73.49    2.70
   4   4  -1   72.19    2.80
   4   4  -1   70.39    2.80
   4   4  -1   72.89    2.90
   4   4  -1   75.39    2.90
  -4   4   1   74.59    2.80
   4   4  -1   70.39    2.80
  -4   4   1   73.99    2.80
   2  -4  -1  287.27   10.00
  -2  -4   1  287.87    9.90
   2  -4  -1  262.87    9.90
  -2  -4   1  255.87    9.90
   2  -4  -1  274.37    9.90
   2  -4  -1  282.67    9.70
  -2  -4   1  287.67   10.10
   2  -4  -1  293.77   10.00
  -2  -4   1  284.47    9.70
  -2  -4   1  274.87    9.90
  -2   4   1  286.87    9.90
   2   4  -1  283.47   10.00
   2   4  -1  287.67    9.70
   2   4  -1  282.77    9.90
   2   4  -1  287.77   10.20
  -2   4   1  285.37    9.60
  -2   4   1  290.27   10.10
   2   4  -1  284.67   10.00
  -2   4   1  295.97    9.90
   0  -4   1 1908.11   66.79
   0  -4  -1 1890.51   66.79
   0  -4  -1 1980.80   65.99
   0  -4  -1 1849.31   67.59
   0  -4  -1 1840.32   66.99
   0  -4   1 1945.61   67.59
   0  -4  -1 1953.10   67.29
   0  -4   1 2019.10   66.09
   0  -4   1 1983.00   67.39
   0  -4   1 2020.60   67.09
   0   4   1 2000.10   66.89
   0   4   1 1956.70   65.09
   0   4  -1 1974.60   68.69
   0   4  -1 1973.00   66.99
   0   4  -1 1974.80   67.59
   0   4   1 1973.90   68.69
   0   4  -1 2008.60   66.89
   0   4  -1 1981.40   65.09
   0   4   1 1931.91   67.59
   0   4   1 1950.60   67.09
  -2  -4  -1    1.00    0.40
   2  -4   1    0.80    0.40
   2  -4   1    0.60    0.30
   2  -4   1    1.20    0.30
  -2  -4  -1    0.30    0.30
  -2  -4  -1    0.00    0.40
   2  -4   1    0.50    0.40
   2  -4   1    0.10    0.30
   2  -4   1    0.60    0.30
  -2  -4  -1    0.40    0.30
  -2  -4  -1    0.00    0.20
   2  -4   1    1.00    0.40
  -2  -4  -1    0.10    0.40
  -2  -4  -1   -0.10    0.40
   2   4   1    0.10    0.40
   2   4   1    0.50    0.40
   2   4   1    0.50    0.40
  -2   4  -1    0.00    0.30
   2   4   1    1.00    0.40
  -2   4  -1    0.10    0.40
  -2   4  -1    0.80    0.30
   2   4   1    1.00    0.40
   4  -4   1  227.78    7.80
   4  -4   1  222.18    8.00
   4  -4   1  238.28    8.00
  -4  -4  -1  230.18    8.20
   4  -4   1  217.98    8.10
  -4  -4  -1  239.48    7.90
  -4  -4  -1  225.68    8.00
  -4  -4  -1  231.88    8.10
   4  -4   1  223.58    8.10
   4  -4   1  218.48    8.00
  -4  -4  -1  233.18    8.10
   4   4   1  221.18    8.00
   4   4   1  224.78    8.30
   4   4   1  231.28    8.00
   4   4   1  217.58    7.80
  -4   4  -1  229.18    8.00
   4   4   1  218.98    8.00
   4   4   1  219.78    8.10
  -4   4  -1  231.28    8.20
   6  -4   1   66.29    2.70
   6  -4   1   66.19    2.60
   6  -4   1   70.79    2.60
  -6  -4  -1   59.19    2.70
   6  -4   1   65.19    2.70
   6  -4   1   70.59    2.60
  -6  -4  -1   72.29    2.70
   6  -4   1   69.39    2.60
  -6  -4  -1   63.89    2.80
  -6  -4  -1   72.19    2.50
   6  -4   1   75.39    2.40
  -6  -4  -1   70.99    2.50
   6  -4   1   67.99    2.60
   6   4   1   69.39    2.60
   6   4   1   69.69    2.70
   6   4   1   64.19    2.70
   6   4   1   71.29    2.70
   6   4   1   71.39    2.70
   6   4   1   69.69    2.80
  -8  -4  -1   94.49    3.30
   8  -4   1   86.69    3.50
   8  -4   1   91.19    3.50
   8  -4   1   95.19    3.40
  -8  -4  -1   91.39    3.60
  -8  -4  -1   97.09    3.20
   8  -4   1   89.59    3.60
   8  -4   1   95.69    3.40
  -8  -4  -1   88.89    3.50
  -8  -4  -1   93.49    3.50
   8  -4   1   91.79    3.30
  -8  -4  -1   89.59    3.50
   8   4   1   86.39    3.50
   8   4   1   89.89    3.30
   8   4   1   87.89    3.50
   8   4   1   89.19    3.50
   8   4   1   89.69    3.50
   8   4   1   85.79    3.40
 -10  -4  -1    1.90    0.50
 -10  -4  -1    2.30    0.30
  10  -4   1    1.70    0.40
  10  -4   1    2.40    0.40
  10  -4   1    1.80    0.40
 -10  -4  -1    2.50    0.50
  10  -4   1    3.00    0.60
  10  -4   1    1.30    0.40
 -10  -4  -1    1.20    0.50
  10  -4   1    1.40    0.30
  10  -4   1    1.80    0.30
  10  -4   1    2.00    0.40
 -10  -4  -1    1.80    0.30
  10   4   1    1.40    0.50
  10   4   1    1.60    0.40
  10   4   1    2.30    0.50
  10   4   1    1.30    0.60
  10   4   1    1.90    0.30
  10   4   1    1.80    0.50
  10   4   1    1.40    0.40
  10   4   1    1.70    0.30
  12  -4   1   15.60    0.90
 -12  -4  -1   16.00    1.20
  12  -4   1   16.90    0.80
  12  -4   1   16.10    0.80
 -12  -4  -1   15.40    1.20
  12  -4   1   18.00    1.20
  12  -4   1   17.50    0.90
  12  -4   1   16.60    0.90
 -12  -4  -1   16.90    1.10
  12  -4   1   15.20    1.10
  12  -4   1   16.80    1.00
 -12  -4  -1   16.30    0.80
 -12  -4  -1   16.60    0.80
  12  -4   1   16.00    0.90
  12  -4   1   16.60    1.00
  12   4   1   18.00    1.20
  12   4   1   15.80    1.00
  12   4   1   15.20    1.00
  12   4   1   16.80    0.80
  12   4   1   15.60    1.10
  12   4   1   17.90    1.00
  12   4   1   16.20    1.00
  12   4   1   15.50    0.80
  14  -4   1   38.50    2.00
 -14  -4  -1   40.90    2.00
  14  -4   1   40.10    1.90
  14  -4   1   37.70    1.60
 -14  -4  -1   37.30    2.00
 -14  -4  -1   41.20    1.70
 -14  -4  -1   43.60    1.70
  14  -4   1   38.30    1.60
  14  -4   1   42.80    1.70
  14  -4   1   37.50    1.60
  14  -4   1   37.80    1.60
  14  -4   1   43.70    1.60
 -14  -4  -1   41.70    2.00
  14  -4   1   40.30    2.00
  14  -4   1   41.40    1.80
  14   4   1   43.00    1.80
  14   4   1   39.60    1.80
  14   4   1   41.20    2.00
  14   4   1   37.60    2.00
  14   4   1   39.40    1.80
  14   4   1   39.40    1.50
  14   4   1   40.10    1.80
  16  -4   1    6.60    0.50
 -16  -4  -1    6.30    0.80
  16  -4   1    6.30    0.80
  16  -4   1    6.90    0.90
  16  -4   1    4.50    0.50
  16  -4   1    5.70    0.40
 -16  -4  -1    6.00    0.60
 -16  -4  -1    6.10    0.60
  16  -4   1    5.10    0.70
  16  -4   1    5.10    0.50
  16  -4   1    5.30    0.80
 -16  -4  -1    5.80    0.80
  16   4   1    6.30    0.90
  16   4   1    6.50    0.70
  16   4   1    4.20    0.80
  18  -4   1   18.70    0.90
  18  -4   1   18.40    1.00
 -18  -4  -1   17.50    1.40
  18  -4   1   18.30    1.00
  18  -4   1   20.10    0.90
  18  -4   1   17.70    1.30
  18  -4   1   17.10    1.20
 -18  -4  -1   16.50    1.00
 -18  -4  -1   18.50    1.00
  18  -4   1   15.50    1.30
  18  -4   1   19.10    0.80
  18  -4   1   16.40    0.70
  18  -4   1   17.40    1.40
  18   4   1   18.50    1.20
  18   4   1   13.80    1.30
 -18   4  -1   16.70    1.30
  18   4   1   19.80    1.50
  18   4   1   19.50    1.10
  20  -4   1   13.50    1.40
 -20  -4  -1   14.70    1.00
  20  -4   1   12.50    1.30
  20  -4   1   14.10    0.90
 -20  -4  -1   11.70    0.90
  20  -4   1   12.10    1.10
  20  -4   1   14.50    0.80
 -20  -4  -1    9.80    1.20
  20  -4   1   13.70    1.20
 -20  -4  -1   14.20    1.40
  20  -4   1   15.00    0.80
  20  -4   1   13.90    0.90
  20   4   1   11.70    1.00
  20   4   1   15.10    1.40
  20   4   1   13.00    1.00
  20   4   1   14.40    1.20
  20   4   1   11.90    1.30
  20   4   1   11.60    1.00
 -20   4  -1   11.70    1.20
  22  -4   1   48.50    2.50
 -22  -4  -1   45.60    2.50
  22  -4   1   46.80    1.90
 -22  -4  -1   44.80    2.40
 -22  -4  -1   43.80    2.00
  22  -4   1   42.20    2.20
  22  -4   1   45.20    1.90
  22  -4   1   47.10    2.50
  22  -4   1   44.40    2.30
  22   4   1   44.40    2.40
  22   4   1   44.10    2.10
  22   4   1   43.40    2.00
 -22   4  -1   45.60    2.50
  22   4   1   46.30    2.40
  22   4   1   46.00    2.20
 -22   4  -1   43.10    2.40
  22   4   1   45.60    2.10
  24  -4   1   25.50    1.80
  24  -4   1   24.90    1.70
  24  -4   1   25.90    2.00
  24  -4   1   28.10    1.30
 -24  -4  -1   26.40    2.00
  24  -4   1   24.00    1.30
  24  -4   1   29.30    1.90
 -24  -4  -1   25.50    1.90
 -24   4  -1   25.00    1.90
  24   4   1   27.90    1.90
  24   4   1   27.00    1.50
  24   4   1   28.30    2.00
  24   4   1   24.80    1.50
  24   4   1   26.50    1.40
  24   4   1   26.90    1.70
 -24   4  -1   25.40    1.80
  26  -4   1   10.00    0.80
  26  -4   1    9.30    1.30
  26  -4   1    9.40    0.80
  26  -4   1    8.20    1.20
  26  -4   1   10.40    1.40
 -26  -4  -1    7.30    1.30
 -26  -4  -1   10.50    1.50
  26  -4   1    9.40    1.40
  26   4   1    9.60    1.30
  26   4   1    9.60    1.00
  26   4   1    9.80    0.90
 -26   4  -1   11.40    1.40
 -26   4  -1    8.40    1.20
  26   4   1    9.90    1.00
  26   4   1   10.50    1.20
  26   4   1    9.70    1.30
  28  -4   1    1.20    0.80
  28  -4   1    0.00    0.90
  28  -4   1    0.10    0.50
  28  -4   1    0.00    0.40
 -28  -4  -1    0.00    0.80
 -28  -4  -1   -0.30    0.80
  28  -4   1   -0.60    0.90
 -28   4  -1    0.70    1.00
  28   4   1    0.00    0.60
 -28   4  -1    0.30    1.00
  28   4   1   -0.80    0.90
  28   4   1    1.00    0.50
  28   4   1   -0.60    0.70
  28   4   1    0.10    1.00
  28   4   1   -0.30    0.60
  30  -4   1    2.10    0.50
  30  -4   1    2.40    1.10
 -30  -4  -1    0.80    1.00
  30  -4   1    2.70    0.60
 -30  -4  -1    2.80    1.10
  30  -4   1    2.00    1.10
  30  -4   1    3.40    1.10
  30   4   1    1.90    0.70
 -30   4  -1    1.40    1.10
 -30   4  -1    1.20    1.00
  30   4   1    1.70    0.50
  30   4   1    1.90    0.70
  30   4   1    1.90    1.10
  30   4   1    1.40    0.90
 -32  -4  -1    0.30    1.20
 -32  -4  -1    0.40    1.20
  32  -4   1    0.80    1.00
  32  -4   1    0.20    0.90
  32  -4   1   -0.20    0.60
  32  -4   1   -0.50    0.90
  32  -4   1    0.30    0.60
  32   4   1    0.20    1.10
  32   4   1    0.20    0.30
 -32   4  -1    0.00    1.10
  32   4   1    0.50    1.10
  32   4   1    1.40    0.80
  32   4   1   -0.70    0.70
 -32   4  -1    0.30    1.00
  31  -5  -1    6.70    1.30
 -31  -5   1    5.30    1.30
  31  -5  -1    6.10    0.80
  31  -5  -1    6.10    1.40
 -31  -5   1    5.80    1.40
  31  -5  -1    4.80    1.30
 -31  -5   1    5.80    1.30
  31  -5  -1    6.70    0.90
  31   5  -1    6.30    1.30
  31   5  -1    6.30    1.00
  31   5  -1    4.20    1.40
  31   5  -1    5.80    0.90
 -31   5   1    5.40    1.40
 -31   5   1    5.70    1.40
  31   5  -1    5.80    1.00
  29  -5  -1    8.50    0.90
  29  -5  -1    8.90    0.90
 -29  -5   1    9.20    1.40
  29  -5  -1    7.00    1.30
  29  -5  -1    8.40    1.30
 -29  -5   1    8.60    1.40
  29  -5  -1   10.10    1.50
 -29  -5   1    8.60    1.60
  29   5  -1    8.50    0.90
  29   5  -1    6.20    1.00
  29   5  -1    6.10    1.30
 -29   5   1    8.70    1.40
 -29   5   1    6.20    1.40
  29   5  -1    7.60    1.40
  29   5  -1    8.20    1.10
  27  -5  -1    2.40    0.90
  27  -5  -1    1.60    0.60
  27  -5  -1    1.70    1.00
  27  -5  -1    2.20    0.60
  27  -5  -1    3.30    1.10
 -27  -5   1    2.90    1.20
 -27  -5   1    2.00    1.00
 -27  -5   1   -0.10    0.80
 -27   5   1    5.80    1.20
  27   5  -1    3.60    0.80
 -27   5   1    0.90    0.90
  27   5  -1    3.80    0.80
  27   5  -1    0.30    1.00
  27   5  -1    3.00    0.90
  27   5  -1    1.90    0.70
  27   5  -1    1.70    0.90
  25  -5  -1   33.10    2.30
 -25  -5   1   27.60    2.20
  25  -5  -1   29.60    1.90
 -25  -5   1   29.10    2.00
  25  -5  -1   26.20    1.50
  25  -5  -1   27.70    1.50
 -25  -5   1   26.40    1.90
  25  -5  -1   31.30    2.00
  25  -5  -1   29.50    2.00
  25   5  -1   28.50    2.20
  25   5  -1   27.80    2.00
 -25   5   1   25.70    1.90
  25   5  -1   29.40    1.80
  25   5  -1   26.60    1.60
  25   5  -1   28.00    1.80
  25   5  -1   27.40    1.70
 -25   5   1   29.30    2.00
 -23  -5   1    7.30    1.10
  23  -5  -1    4.80    0.70
 -23  -5   1    3.60    1.00
  23  -5  -1    5.40    1.00
  23  -5  -1    6.90    0.50
 -23  -5   1    7.20    1.20
  23  -5  -1    5.70    0.40
  23  -5  -1    5.10    1.10
  23  -5  -1    7.00    1.10
  23  -5  -1    7.40    1.10
  23  -5  -1    6.50    0.70
  23   5  -1    5.60    1.10
  23   5  -1    6.70    1.00
 -23   5   1    5.60    1.10
  23   5  -1    6.10    0.90
  23   5  -1    5.90    0.80
  23   5  -1    7.00    1.10
 -23   5   1    6.30    1.10
  23   5  -1    5.30    0.80
  21  -5  -1   36.90    1.50
  21  -5  -1   39.70    1.70
  21  -5  -1   37.30    2.20
  21  -5  -1   36.70    2.00
 -21  -5   1   35.40    2.10
  21  -5  -1   34.40    2.00
 -21  -5   1   38.80    1.80
  21  -5  -1   32.30    1.70
  21  -5  -1   35.30    1.50
  21  -5  -1   37.10    2.20
 -21  -5   1   34.50    2.10
 -21  -5   1   36.80    2.20
 -21   5   1   33.10    2.10
  21   5  -1   36.30    1.90
  21   5  -1   28.90    1.80
  21   5  -1   37.70    2.30
  21   5  -1   34.80    1.90
  21   5  -1   35.80    2.10
 -19  -5   1    2.90    0.60
  19  -5  -1    1.90    0.50
  19  -5  -1    1.30    0.70
 -19  -5   1    2.40    0.80
 -19  -5   1    1.90    0.70
  19  -5  -1    2.40    0.70
  19  -5  -1    1.80    0.40
  19  -5  -1    1.80    0.80
  19  -5  -1    2.90    0.90
  19  -5  -1    2.10    0.40
 -19  -5   1    2.70    0.60
 -19  -5   1    3.60    0.80
  19  -5  -1    2.00    0.50
  19   5  -1    2.00    0.80
  19   5  -1    1.60    0.80
  19   5  -1    2.10    0.60
  19   5  -1    3.30    0.70
 -19   5   1    1.90    0.80
  19   5  -1    2.20    0.70
  17  -5  -1   11.00    0.90
 -17  -5   1   14.00    1.20
  17  -5  -1   13.60    0.90
  17  -5  -1   13.90    1.10
  17  -5  -1   12.20    1.20
  17  -5  -1   13.60    1.20
 -17  -5   1   14.50    1.30
 -17  -5   1   12.60    0.90
 -17  -5   1   14.10    0.90
  17  -5  -1   12.60    0.80
  17  -5  -1   12.00    1.30
  17  -5  -1   13.30    0.80
  17  -5  -1   14.20    0.90
  17   5  -1   12.70    0.70
 -17   5   1   13.10    1.20
  17   5  -1   12.50    1.20
  17   5  -1   12.40    1.10
  17   5  -1   12.60    1.30
  17   5  -1   13.30    0.70
  17   5  -1   11.90    1.00
  17   5  -1   11.60    1.00
  15  -5  -1    3.40    0.70
  15  -5  -1    4.50    0.70
 -15  -5   1    4.30    0.80
  15  -5  -1    3.90    0.50
 -15  -5   1    4.50    0.50
  15  -5  -1    3.90    0.70
  15  -5  -1    1.50    0.40
 -15  -5   1    4.20    0.80
  15  -5  -1    3.50    0.50
  15  -5  -1    4.60    0.50
 -15  -5   1    4.20    0.50
  15   5  -1    3.80    0.70
  15   5  -1    4.00    0.90
  15   5  -1    3.30    0.60
  15   5  -1    3.40    0.60
  15   5  -1    3.60    0.70
  15   5  -1    3.60    0.40
  15   5  -1    3.40    0.70
  15   5  -1    3.20    0.50
 -13  -5   1  197.08    7.70
  13  -5  -1  213.58    7.40
  13  -5  -1  204.88    7.30
 -13  -5   1  200.48    7.10
  13  -5  -1  216.88    7.30
  13  -5  -1  200.98    7.70
  13  -5  -1  197.08    7.40
 -13  -5   1  199.08    7.40
 -13  -5   1  210.98    7.50
 -13  -5   1  206.88    7.30
  13  -5  -1  203.48    7.30
  13   5  -1  199.28    7.50
  13   5  -1  200.88    7.80
  13   5  -1  215.98    7.50
  13   5  -1  203.48    7.40
  13   5  -1  195.78    7.10
  13   5  -1  193.28    7.40
  13   5  -1  217.58    7.10
  13   5  -1  202.48    7.40
  11  -5  -1   73.39    3.00
 -11  -5   1   71.99    3.00
 -11  -5   1   71.89    3.10
  11  -5  -1   73.49    3.10
  11  -5  -1   76.69    3.10
  11  -5  -1   66.79    2.90
 -11  -5   1   77.99    2.80
  11  -5  -1   69.29    2.90
  11  -5  -1   72.69    2.90
  11  -5  -1   78.39    2.90
  11  -5  -1   77.09    2.90
  11  -5  -1   80.69    2.90
 -11  -5   1   77.69    3.00
 -11  -5   1   76.09    2.80
  11   5  -1   75.19    3.00
  11   5  -1   74.89    3.00
  11   5  -1   71.99    3.20
  11   5  -1   72.99    3.00
  11   5  -1   74.39    3.00
  11   5  -1   72.39    2.80
  -9  -5   1   20.10    1.20
   9  -5  -1   19.20    1.20
   9  -5  -1   19.20    1.20
  -9  -5   1   19.40    0.90
   9  -5  -1   19.00    0.80
   9  -5  -1   19.80    1.10
  -9  -5   1   19.60    0.90
  -9  -5   1   18.70    1.10
   9  -5  -1   18.50    1.10
  -9  -5   1   16.70    1.10
  -9  -5   1   17.30    1.10
   9  -5  -1   19.30    1.10
   9  -5  -1   20.40    1.10
   9  -5  -1   16.70    1.00
   9   5  -1   18.50    1.10
  -9   5   1   18.60    1.00
   9   5  -1   17.40    1.20
   9   5  -1   18.30    1.10
   9   5  -1   17.70    1.10
   9   5  -1   15.80    1.00
   9   5  -1   18.00    1.10
  -7  -5   1   27.90    1.20
  -7  -5   1   25.70    1.40
  -7  -5   1   28.30    1.20
   7  -5  -1   26.00    1.30
  -7  -5   1   28.50    1.40
   7  -5  -1   27.40    1.20
   7  -5  -1   25.80    1.40
   7  -5  -1   27.70    1.40
   7  -5  -1   27.40    1.40
  -7  -5   1   26.10    1.40
  -7  -5   1   26.60    1.40
  -7  -5   1   25.80    1.30
   7  -5  -1   29.40    1.40
   7  -5  -1   25.70    1.50
  -7  -5   1   26.50    1.40
   7  -5  -1   28.20    1.30
   7   5  -1   27.20    1.40
   7   5  -1   25.00    1.40
  -7   5   1   26.90    1.30
   7   5  -1   26.30    1.40
   7   5  -1   26.00    1.30
   7   5  -1   27.10    1.40
   7   5  -1   28.70    1.50
  -5  -5   1   33.40    1.50
   5  -5  -1   31.40    1.50
   5  -5  -1   32.70    1.50
  -5  -5   1   32.90    1.50
   5  -5  -1   31.90    1.60
   5  -5  -1   32.10    1.50
  -5  -5   1   31.90    1.40
   5  -5  -1   29.90    1.50
  -5  -5   1   30.40    1.50
   5  -5  -1   30.70    1.50
   5  -5  -1   32.50    1.40
  -5  -5   1   30.90    1.60
   5   5  -1   30.70    1.50
  -5   5   1   31.00    1.40
   5   5  -1   31.70    1.60
   5   5  -1   31.70    1.50
   5   5  -1   30.20    1.50
   5   5  -1   32.40    1.50
  -5   5   1   32.70    1.50
   5   5  -1   30.20    1.50
  -5   5   1   31.20    1.50
   3  -5  -1   31.80    1.60
  -3  -5   1   34.70    1.60
   3  -5  -1   31.00    1.50
   3  -5  -1   32.80    1.50
   3  -5  -1   32.80    1.50
  -3  -5   1   34.90    1.50
  -3  -5   1   32.30    1.40
   3  -5  -1   30.60    1.50
  -3  -5   1   31.70    1.60
   3  -5  -1   34.40    1.40
  -3  -5   1   33.80    1.60
  -3  -5   1   32.20    1.50
  -3   5   1   33.90    1.60
  -3   5   1   34.20    1.50
   3   5  -1   32.20    1.60
   3   5  -1   31.30    1.60
  -3   5   1   33.70    1.50
   3   5  -1   33.80    1.50
   3   5  -1   37.50    1.50
   3   5  -1   33.50    1.60
   1  -5  -1   22.40    1.20
   1  -5  -1   20.50    1.10
   1  -5  -1   22.80    1.00
  -1  -5   1   20.00    1.10
   1  -5  -1   20.90    1.10
  -1  -5   1   21.40    1.00
  -1  -5   1   21.50    1.20
   1  -5  -1   19.90    1.10
  -1  -5   1   22.00    1.10
  -1  -5   1   22.10    1.10
  -1  -5   1   20.90    1.10
   1  -5  -1   19.70    1.20
  -1  -5   1   18.60    1.10
   1   5  -1   20.00    1.10
  -1   5   1   22.40    1.20
   1   5  -1   21.00    1.10
   1   5  -1   22.30    1.10
   1   5  -1   19.70    1.10
  -1   5   1   21.10    1.10
  -1   5   1   21.20    1.20
  -1   5   1   23.50    1.10
  -1   5   1   22.20    1.20
   1   5  -1   20.60    1.20
  -1  -5  -1  352.96   13.00
  -1  -5  -1  320.47   13.40
   1  -5   1  379.16   13.30
  -1  -5  -1  384.66   13.10
   1  -5   1  348.57   13.20
  -1  -5  -1  381.06   13.40
  -1  -5  -1  376.06   13.30
   1  -5   1  375.16   13.10
   1  -5   1  384.26   12.90
   1  -5   1  364.06   13.40
   1  -5   1  390.36   13.50
   1  -5   1  366.86   13.20
  -1  -5  -1  382.06   13.20
  -1  -5  -1  393.26   13.20
   1   5   1  378.76   13.20
  -1   5  -1  390.86   12.90
  -1   5  -1  392.56   13.20
  -1   5  -1  389.26   13.30
   1   5   1  381.26   13.20
   1   5   1  384.06   13.40
  -1   5  -1  385.16   13.60
   1   5   1  381.16   13.60
  -1   5  -1  390.76   13.20
   1   5   1  389.26   12.90
   3  -5   1   -0.10    0.30
   3  -5   1    0.10    0.40
   3  -5   1   -0.60    0.40
  -3  -5  -1    0.10    0.20
   3  -5   1   -0.10    0.50
  -3  -5  -1    0.70    0.50
  -3  -5  -1    0.20    0.40
  -3  -5  -1   -0.10    0.40
   3  -5   1    0.10    0.40
   3  -5   1    0.20    0.40
  -3  -5  -1   -0.20    0.40
  -3  -5  -1    0.40    0.30
  -3  -5  -1    0.40    0.40
   3  -5   1    0.40    0.40
   3   5   1   -0.10    0.40
  -3   5  -1    0.80    0.40
   3   5   1    0.20    0.40
  -3   5  -1   -0.40    0.30
  -3   5  -1    0.00    0.40
   3   5   1    0.00    0.40
   3   5   1    0.00    0.40
   3   5   1   -0.10    0.50
   5  -5   1   94.89    3.70
  -5  -5  -1   91.39    3.50
   5  -5   1  101.39    3.60
  -5  -5  -1   99.29    3.70
  -5  -5  -1   91.59    3.70
   5  -5   1   92.29    3.60
   5  -5   1   94.39    3.60
  -5  -5  -1   97.29    3.60
   5  -5   1   94.69    3.40
   5  -5   1   95.19    3.60
  -5  -5  -1   96.79    3.40
  -5  -5  -1   99.19    3.60
   5  -5   1   86.19    3.50
   5  -5   1   90.79    3.50
   5   5   1   90.59    3.70
   5   5   1   93.59    3.50
  -5   5  -1   92.09    3.60
   5   5   1   90.89    3.60
   5   5   1   88.99    3.60
  -5   5  -1   91.49    3.60
   5   5   1   94.39    3.60
   7  -5   1  224.68    8.00
   7  -5   1  225.98    8.10
  -7  -5  -1  224.38    8.00
  -7  -5  -1  228.38    8.10
   7  -5   1  232.58    7.90
   7  -5   1  245.28    7.70
  -7  -5  -1  224.58    8.30
   7  -5   1  214.18    8.00
   7  -5   1  224.18    8.20
   7  -5   1  224.18    8.00
  -7  -5  -1  235.78    8.00
   7  -5   1  239.28    8.10
   7  -5   1  227.08    8.30
   7   5   1  227.98    8.20
   7   5   1  214.88    8.40
   7   5   1  215.48    8.10
   7   5   1  220.48    8.10
   7   5   1  219.38    8.10
   7   5   1  220.08    7.80
   9  -5   1    0.20    0.50
   9  -5   1    0.60    0.40
   9  -5   1    0.50    0.40
   9  -5   1    0.60    0.40
  -9  -5  -1    0.80    0.30
   9  -5   1    1.40    0.50
   9  -5   1    0.20    0.30
  -9  -5  -1    0.10    0.40
   9  -5   1   -0.20    0.30
   9  -5   1    0.10    0.40
  -9  -5  -1    0.50    0.40
  -9  -5  -1    0.60    0.50
  -9  -5  -1   -0.10    0.40
  -9  -5  -1    0.80    0.30
   9   5   1    1.10    0.40
   9   5   1   -0.20    0.50
   9   5   1    0.50    0.40
   9   5   1    0.20    0.40
   9   5   1    0.70    0.50
   9   5   1   -0.30    0.40
   9   5   1    0.20    0.40
 -11  -5  -1    0.60    0.30
  11  -5   1    0.70    0.40
  11  -5   1    0.30    0.30
  11  -5   1    0.30    0.40
  11  -5   1    0.10    0.20
  11  -5   1    1.00    0.40
  11  -5   1    2.30    0.60
  11  -5   1    0.60    0.40
  11  -5   1    0.10    0.20
 -11  -5  -1    1.30    0.50
 -11  -5  -1   -0.10    0.30
 -11  -5  -1    0.10    0.40
  11  -5   1    0.70    0.30
  11  -5   1    0.40    0.40
 -11  -5  -1    0.80    0.50
 -11  -5  -1    0.20    0.40
  11   5   1   -0.10    0.50
  11   5   1    1.10    0.50
  11   5   1    0.90    0.50
  11   5   1    0.50    0.50
  11   5   1   -0.10    0.40
  11   5   1    0.20    0.50
  11   5   1    0.30    0.20
 -13  -5  -1    0.20    0.50
 -13  -5  -1   -0.20    0.30
  13  -5   1   -1.00    0.50
  13  -5   1    0.40    0.40
 -13  -5  -1   -0.10    0.50
  13  -5   1   -0.30    0.30
  13  -5   1    0.10    0.40
  13  -5   1   -0.10    0.60
 -13  -5  -1    0.20    0.30
  13  -5   1    0.30    0.40
  13  -5   1   -0.10    0.40
  13  -5   1   -0.20    0.20
  13  -5   1   -0.10    0.30
 -13  -5  -1    0.20    0.50
  13  -5   1    0.10    0.30
  13   5   1   -1.10    0.50
  13   5   1   -0.30    0.50
  13   5   1   -0.20    0.50
  13   5   1    0.30    0.40
  13   5   1   -0.20    0.30
  13   5   1    0.30    0.30
  13   5   1   -0.50    0.50
  13   5   1   -0.50    0.50
 -15  -5  -1   83.79    3.10
  15  -5   1   87.99    3.20
  15  -5   1   82.79    3.10
 -15  -5  -1   83.69    3.10
  15  -5   1   78.99    3.10
  15  -5   1   78.99    3.50
  15  -5   1   80.59    3.10
 -15  -5  -1   82.39    3.50
  15  -5   1   84.09    3.30
 -15  -5  -1   82.09    3.40
  15  -5   1   76.69    3.20
  15  -5   1   81.29    3.40
 -15  -5  -1   79.49    3.50
  15  -5   1   89.49    3.20
  15   5   1   79.79    3.30
  15   5   1   83.49    3.40
  15   5   1   82.19    3.30
  15   5   1   78.09    3.40
  15   5   1   88.19    3.40
  15   5   1   79.19    3.60
  15   5   1   80.29    2.90
  17  -5   1   62.09    2.50
  17  -5   1   61.79    2.70
  17  -5   1   59.99    2.80
 -17  -5  -1   59.59    2.90
 -17  -5  -1   61.29    2.40
  17  -5   1   62.09    2.40
  17  -5   1   58.69    2.30
  17  -5   1   60.39    2.50
  17  -5   1   64.19    2.60
 -17  -5  -1   60.79    2.90
 -17  -5  -1   62.89    2.40
  17  -5   1   64.99    2.50
 -17  -5  -1   58.79    2.80
  17  -5   1   60.59    2.90
  17   5   1   61.19    2.70
  17   5   1   60.39    2.60
  17   5   1   62.79    2.90
  17   5   1   56.49    2.60
  17   5   1   62.19    2.90
  19  -5   1   49.70    2.00
  19  -5   1   44.80    2.40
 -19  -5  -1   50.49    2.50
  19  -5   1   46.40    1.80
  19  -5   1   47.70    2.00
  19  -5   1   49.40    1.80
  19  -5   1   45.60    2.30
 -19  -5  -1   48.00    2.00
  19  -5   1   48.00    2.40
 -19  -5  -1   42.10    2.30
  19  -5   1   50.09    1.80
  19  -5   1   45.20    2.50
 -19  -5  -1   46.50    2.50
  19   5   1   49.90    2.50
 -19   5  -1   45.50    2.40
  19   5   1   46.70    2.50
  19   5   1   47.90    2.20
  19   5   1   46.00    2.30
  19   5   1   48.30    2.20
  21  -5   1   46.20    2.00
 -21  -5  -1   44.30    2.50
  21  -5   1   45.60    2.50
  21  -5   1   47.30    2.00
 -21  -5  -1   44.20    2.40
  21  -5   1   47.40    2.40
  21  -5   1   47.30    2.30
  21  -5   1   46.20    2.60
 -21  -5  -1   46.10    2.60
  21   5   1   44.20    2.50
  21   5   1   43.10    2.10
 -21   5  -1   48.80    2.60
  21   5   1   49.20    2.30
  21   5   1   44.20    2.50
  21   5   1   45.80    2.20
  21   5   1   45.90    2.30
  23  -5   1    3.10    0.60
  23  -5   1    2.10    1.00
  23  -5   1    2.60    0.90
  23  -5   1    2.30    0.50
 -23  -5  -1    2.50    0.90
  23  -5   1    2.50    1.00
 -23  -5  -1    2.30    0.90
 -23  -5  -1    1.50    0.90
  23  -5   1    2.60    0.80
  23   5   1    3.20    0.80
  23   5   1    3.70    0.70
  23   5   1    2.60    0.70
  23   5   1    4.80    1.10
  23   5   1    2.80    0.90
 -23   5  -1    3.50    1.00
  23   5   1    3.80    1.00
 -25  -5  -1   12.60    1.60
  25  -5   1   13.00    1.00
  25  -5   1   11.90    1.50
  25  -5   1   10.30    1.50
 -25  -5  -1   13.30    1.60
  25  -5   1   12.70    1.00
 -25  -5  -1   10.30    1.50
  25  -5   1   12.00    1.30
  25  -5   1   11.60    1.40
  25   5   1   12.50    1.30
 -25   5  -1   11.20    1.50
  25   5   1   13.50    1.10
 -25   5  -1   12.10    1.50
  25   5   1   12.40    1.20
  25   5   1    9.70    1.40
  25   5   1   13.70    1.20
  25   5   1   13.90    1.50
  27  -5   1    8.00    0.80
  27  -5   1    7.90    0.80
  27  -5   1    8.10    1.50
 -27  -5  -1    9.70    1.50
 -27  -5  -1    7.20    1.40
  27  -5   1    6.40    1.20
  27  -5   1    7.50    1.30
 -27  -5  -1    7.80    1.30
  27  -5   1    8.60    1.20
  27   5   1    6.60    1.00
  27   5   1    9.10    1.30
  27   5   1    7.20    1.30
 -27   5  -1    7.60    1.20
 -27   5  -1    9.80    1.50
  27   5   1    8.40    1.00
  27   5   1    6.50    1.10
  27   5   1    7.10    0.90
 -29  -5  -1    2.60    1.10
 -29  -5  -1    0.70    1.10
  29  -5   1    3.80    1.20
  29  -5   1    2.10    1.10
  29  -5   1    3.00    0.60
  29  -5   1    3.20    1.00
  29  -5   1    3.30    0.60
 -29  -5  -1    1.30    1.10
  29   5   1    4.00    0.90
 -29   5  -1    2.10    1.00
  29   5   1    1.80    1.10
 -29   5  -1    1.90    1.00
  29   5   1    3.50    0.70
  29   5   1    1.80    1.00
  29   5   1    4.40    0.90
 -31  -5  -1    0.30    1.00
  31  -5   1   -0.60    1.00
  31  -5   1    0.50    0.60
 -31  -5  -1    1.10    1.00
  31  -5   1    1.80    1.10
 -31  -5  -1   -1.60    1.10
  31  -5   1   -0.30    1.10
  31  -5   1    0.40    0.60
 -31   5  -1    0.10    0.90
  31   5   1    0.80    0.60
 -31   5  -1    1.40    1.20
  31   5   1    1.20    0.80
  31   5   1    0.00    0.70
  31   5   1    0.40    1.10
  31   5   1   -0.10    1.10
  30  -6  -1    1.50    1.20
  30  -6  -1    0.60    0.70
 -30  -6   1    0.70    1.10
  30  -6  -1    0.20    0.90
  30  -6  -1    1.00    0.70
  30  -6  -1   -0.30    0.90
 -30  -6   1    0.70    1.10
 -30  -6   1    1.20    1.10
  30   6  -1    2.60    0.80
  30   6  -1    2.10    0.90
 -30   6   1    3.30    1.30
 -30   6   1    2.10    1.00
  30   6  -1    2.70    1.20
  30   6  -1    4.20    1.00
  30   6  -1    2.80    1.20
  28  -6  -1    1.20    0.70
 -28  -6   1    0.50    1.00
  28  -6  -1    0.40    0.60
 -28  -6   1   -1.40    0.80
  28  -6  -1    0.40    0.80
  28  -6  -1   -0.20    0.80
  28  -6  -1    1.90    1.10
 -28  -6   1   -1.30    0.80
  28  -6  -1    0.60    1.30
  28   6  -1    0.00    0.80
  28   6  -1    0.30    0.80
  28   6  -1    0.40    0.70
  28   6  -1    0.00    0.80
 -28   6   1   -2.20    0.80
  28   6  -1   -0.10    1.10
 -28   6   1    0.10    0.90
  28   6  -1   -1.50    0.80
  26  -6  -1    0.60    1.00
  26  -6  -1    0.10    0.80
 -26  -6   1   -1.10    0.80
  26  -6  -1   -1.60    0.80
  26  -6  -1   -0.10    0.60
 -26  -6   1    0.40    0.90
  26  -6  -1   -0.40    0.60
  26  -6  -1   -0.40    1.00
 -26  -6   1   -0.70    0.90
  26   6  -1    1.70    0.80
  26   6  -1    0.10    0.90
  26   6  -1   -0.10    0.80
  26   6  -1   -0.10    0.60
 -26   6   1    0.50    0.90
  26   6  -1    1.20    0.90
 -26   6   1    0.10    0.80
  26   6  -1    0.40    0.70
 -24  -6   1   42.70    2.50
 -24  -6   1   43.30    2.60
  24  -6  -1   42.50    2.00
  24  -6  -1   46.70    2.70
  24  -6  -1   45.50    2.70
  24  -6  -1   40.90    1.70
  24  -6  -1   46.00    1.70
  24  -6  -1   42.20    2.40
  24  -6  -1   40.30    2.40
 -24  -6   1   38.60    2.50
  24  -6  -1   47.90    2.10
 -24   6   1   40.00    2.50
  24   6  -1   42.10    2.50
  24   6  -1   42.60    2.30
  24   6  -1   45.70    2.40
 -24   6   1   45.30    2.50
  24   6  -1   49.40    2.70
  24   6  -1   46.00    2.30
  24   6  -1   39.30    2.20
  22  -6  -1    3.80    1.00
 -22  -6   1    1.70    1.00
  22  -6  -1    3.30    0.70
 -22  -6   1    1.60    0.90
  22  -6  -1    1.10    0.80
  22  -6  -1    1.80    0.60
  22  -6  -1    3.00    0.50
  22  -6  -1    2.20    0.80
  22  -6  -1    2.10    0.90
 -22  -6   1    4.80    1.10
  22  -6  -1    2.50    0.40
 -22   6   1    3.40    1.00
  22   6  -1    1.50    1.00
  22   6  -1    1.70    0.80
  22   6  -1    2.10    0.80
  22   6  -1    1.90    0.70
  22   6  -1    1.80    0.90
  20  -6  -1    1.80    0.70
  20  -6  -1    1.50    0.60
  20  -6  -1    1.50    0.70
 -20  -6   1    1.90    0.80
  20  -6  -1    1.50    0.80
  20  -6  -1    1.20    0.40
  20  -6  -1    1.90    0.50
 -20  -6   1    1.60    0.80
 -20  -6   1    1.40    0.80
  20  -6  -1    1.10    0.80
  20  -6  -1    1.10    0.60
  20   6  -1    2.40    0.80
  20   6  -1    2.00    0.90
 -20   6   1    1.40    0.80
  20   6  -1    2.30    0.90
  20   6  -1    2.00    0.70
  20   6  -1    0.00    0.70
  18  -6  -1   16.30    1.50
  18  -6  -1   18.30    1.30
  18  -6  -1   21.50    1.10
 -18  -6   1   21.30    1.50
 -18  -6   1   20.60    1.50
 -18  -6   1   20.90    1.20
  18  -6  -1   18.30    1.20
  18  -6  -1   19.90    1.10
  18  -6  -1   18.70    1.50
 -18  -6   1   17.80    1.50
  18  -6  -1   17.30    1.30
  18  -6  -1   18.50    1.20
  18   6  -1   19.00    1.40
 -18   6   1   16.20    1.40
  18   6  -1   18.70    1.40
  18   6  -1   22.80    1.70
  18   6  -1   17.50    1.00
  18   6  -1   20.80    1.60
  18   6  -1   19.70    1.40
 -16  -6   1    5.90    0.90
  16  -6  -1    9.80    0.80
 -16  -6   1   11.50    0.80
 -16  -6   1   11.30    1.20
 -16  -6   1   11.60    0.80
  16  -6  -1   10.20    1.10
  16  -6  -1   10.10    1.10
 -16  -6   1   10.80    1.10
  16  -6  -1    9.40    0.80
  16  -6  -1    6.80    0.90
  16  -6  -1    8.30    0.80
  16  -6  -1   12.60    1.00
  16   6  -1   12.30    1.20
  16   6  -1   10.10    0.80
  16   6  -1   10.50    1.20
  16   6  -1   12.70    1.10
  16   6  -1    9.40    1.00
  16   6  -1   12.20    1.10
  14  -6  -1    0.10    0.20
 -14  -6   1    0.10    0.20
 -14  -6   1    0.20    0.60
  14  -6  -1   -0.20    0.20
 -14  -6   1    0.70    0.60
  14  -6  -1    0.40    0.40
  14  -6  -1    0.40    0.50
 -14  -6   1    0.00    0.40
  14  -6  -1   -0.10    0.40
  14  -6  -1    1.00    0.60
  14  -6  -1   -0.20    0.20
 -14  -6   1   -0.30    0.40
  14  -6  -1    0.00    0.50
  14   6  -1   -0.70    0.60
  14   6  -1    0.30    0.50
  14   6  -1    0.10    0.60
  14   6  -1    0.80    0.60
  14   6  -1    0.20    0.50
  14   6  -1   -0.20    0.20
 -12  -6   1    5.70    0.60
 -12  -6   1    6.80    0.60
  12  -6  -1    4.70    0.60
  12  -6  -1    5.40    0.70
  12  -6  -1    6.30    0.90
 -12  -6   1    6.20    0.90
 -12  -6   1    4.80    0.80
  12  -6  -1    5.40    0.90
  12  -6  -1    4.20    0.80
  12  -6  -1    4.00    0.60
  12  -6  -1    5.50    0.70
 -12  -6   1    5.40    0.90
  12   6  -1    4.90    0.80
  12   6  -1    5.60    0.80
  12   6  -1    5.20    0.80
 -12   6   1    5.50    0.60
  12   6  -1    4.40    0.80
  12   6  -1    5.30    0.80
 -10  -6   1   34.80    2.00
 -10  -6   1   42.20    1.70
  10  -6  -1   40.80    2.00
 -10  -6   1   42.80    2.00
  10  -6  -1   40.70    2.00
  10  -6  -1   43.80    1.60
  10  -6  -1   40.60    1.90
 -10  -6   1   42.10    2.00
  10  -6  -1   46.50    1.90
 -10  -6   1   39.20    1.70
  10  -6  -1   40.10    2.00
  10  -6  -1   41.50    1.80
 -10  -6   1   41.00    2.00
  10  -6  -1   39.80    1.90
  10  -6  -1   42.20    1.90
 -10   6   1   40.70    1.80
  10   6  -1   41.70    2.00
  10   6  -1   39.80    2.00
  10   6  -1   43.30    2.00
  10   6  -1   39.50    1.90
  10   6  -1   44.10    2.00
  10   6  -1   42.00    1.80
  10   6  -1   37.30    2.00
   8  -6  -1   72.09    3.10
   8  -6  -1   70.99    3.10
  -8  -6   1   78.19    3.00
   8  -6  -1   73.59    2.90
  -8  -6   1   75.19    3.00
  -8  -6   1   73.79    3.00
  -8  -6   1   78.09    3.10
   8  -6  -1   76.59    2.70
   8  -6  -1   74.89    3.00
  -8  -6   1   77.49    3.00
   8  -6  -1   72.09    2.90
   8  -6  -1   72.59    3.00
   8  -6  -1   72.89    2.90
  -8  -6   1   72.09    2.80
  -8  -6   1   69.59    3.00
   8  -6  -1   71.59    2.80
   8   6  -1   68.89    3.00
   8   6  -1   70.59    3.00
   8   6  -1   69.69    3.10
  -8   6   1   71.59    2.90
   8   6  -1   70.69    3.00
   8   6  -1   68.79    3.00
   8   6  -1   69.99    2.90
   8   6  -1   73.39    3.00
  -6  -6   1   -0.10    0.50
   6  -6  -1   -0.20    0.20
   6  -6  -1    0.30    0.50
  -6  -6   1   -0.40    0.10
  -6  -6   1    0.90    0.50
  -6  -6   1   -0.40    0.40
   6  -6  -1    0.40    0.50
  -6  -6   1   -0.10    0.50
  -6  -6   1    0.60    0.40
   6  -6  -1    0.40    0.60
  -6  -6   1    0.90    0.50
   6  -6  -1    0.40    0.50
   6  -6  -1    0.60    0.50
   6  -6  -1    0.10    0.40
   6   6  -1   -0.10    0.50
   6   6  -1    0.70    0.40
  -6   6   1    0.70    0.40
   6   6  -1    0.20    0.60
  -6   6   1    0.00    0.50
   6   6  -1    0.30    0.50
   6   6  -1    0.30    0.50
  -6   6   1   -0.10    0.40
   6   6  -1    0.80    0.50
  -4  -6   1  464.05   15.60
   4  -6  -1  445.96   15.70
   4  -6  -1  439.16   15.90
  -4  -6   1  459.65   15.80
   4  -6  -1  441.36   16.10
  -4  -6   1  447.36   15.90
  -4  -6   1  462.35   15.90
   4  -6  -1  448.86   15.90
   4  -6  -1  446.16   15.80
   4  -6  -1  451.85   16.00
  -4  -6   1  445.26   16.00
  -4  -6   1  451.95   15.70
   4   6  -1  459.85   15.90
  -4   6   1  456.75   16.20
  -4   6   1  470.15   15.90
   4   6  -1  440.86   15.90
   4   6  -1  460.95   16.30
   4   6  -1  453.95   15.40
  -4   6   1  456.55   15.40
   4   6  -1  440.66   16.00
  -2  -6   1    6.40    0.70
  -2  -6   1    6.40    0.70
   2  -6  -1    6.30    0.80
   2  -6  -1    5.60    0.70
   2  -6  -1    6.20    0.70
   2  -6  -1    7.50    0.80
  -2  -6   1    6.70    0.70
   2  -6  -1    6.90    0.80
  -2  -6   1    5.50    0.70
  -2  -6   1    5.40    0.70
  -2  -6   1    6.30    0.70
   2   6  -1    6.50    0.70
  -2   6   1    7.80    0.70
  -2   6   1    6.20    0.70
   2   6  -1    6.40    0.70
   2   6  -1    6.10    0.70
   2   6  -1    6.40    0.70
   2   6  -1    6.00    0.70
  -2   6   1    6.40    0.80
  -2   6   1    6.50    0.70
  -2   6   1    6.30    0.70
   0  -6  -1   43.10    2.00
   0  -6  -1   43.20    1.90
   0  -6   1   45.50    2.00
   0  -6   1   41.90    2.00
   0  -6  -1   42.90    2.00
   0  -6   1   48.70    1.80
   0  -6   1   44.00    2.00
   0  -6  -1   43.70    2.00
   0  -6   1   43.20    2.00
   0  -6   1   42.20    2.00
   0  -6   1   44.20    1.90
   0  -6  -1   44.40    2.00
   0   6  -1   44.50    2.00
   0   6  -1   43.60    2.00
   0   6  -1   43.60    2.00
   0   6   1   43.70    2.00
   0   6   1   46.30    2.00
   0   6   1   44.40    1.90
   0   6   1   43.50    2.00
   0   6  -1   46.50    1.90
   0   6   1   44.80    2.00
   0   6  -1   44.10    2.00
  -2  -6  -1   39.40    2.00
   2  -6   1   41.10    1.90
  -2  -6  -1   40.90    1.90
  -2  -6  -1   43.10    2.00
  -2  -6  -1   39.40    1.90
   2  -6   1   38.60    1.90
   2  -6   1   40.90    1.90
  -2  -6  -1   44.70    1.80
   2  -6   1   42.90    1.70
   2  -6   1   40.80    2.00
   2  -6   1   40.90    1.90
   2  -6   1   40.90    1.90
  -2  -6  -1   41.90    1.80
  -2  -6  -1   44.50    2.00
   2   6   1   44.00    2.00
  -2   6  -1   44.60    1.90
   2   6   1   46.00    2.00
   2   6   1   42.00    1.90
   2   6   1   44.60    2.00
  -2   6  -1   44.10    2.00
  -2   6  -1   43.90    2.00
  -2   6  -1   43.10    1.90
  -2   6  -1   46.50    1.90
   2   6   1   45.00    2.00
  -4  -6  -1   15.90    1.10
  -4  -6  -1   15.80    1.10
   4  -6   1   15.50    1.00
  -4  -6  -1   15.90    1.00
   4  -6   1   14.80    1.00
  -4  -6  -1   15.40    1.00
  -4  -6  -1   14.30    1.00
   4  -6   1   14.50    0.80
   4  -6   1   14.60    1.00
  -4  -6  -1   14.70    1.10
   4  -6   1   15.70    1.00
   4  -6   1   14.70    1.10
   4  -6   1   17.40    1.00
  -4  -6  -1   14.80    0.90
   4   6   1   14.50    1.00
  -4   6  -1   13.70    1.00
   4   6   1   13.80    1.10
   4   6   1   13.30    1.00
  -4   6  -1   16.50    1.00
   4   6   1   14.00    1.10
  -4   6  -1   14.50    0.90
   4   6   1   13.30    1.00
  -6  -6  -1    3.40    0.60
   6  -6   1    3.20    0.60
   6  -6   1    3.80    0.50
   6  -6   1    3.60    0.60
   6  -6   1    3.70    0.60
  -6  -6  -1    2.70    0.60
   6  -6   1    3.20    0.60
   6  -6   1    4.10    0.70
  -6  -6  -1    3.10    0.70
  -6  -6  -1    3.20    0.60
   6  -6   1    3.00    0.60
  -6  -6  -1    2.90    0.40
  -6  -6  -1    3.70    0.60
  -6  -6  -1    3.40    0.60
   6  -6   1    3.90    0.50
   6  -6   1    3.50    0.60
   6   6   1    4.00    0.70
   6   6   1    3.70    0.70
   6   6   1    3.40    0.60
  -6   6  -1    3.30    0.50
   6   6   1    3.30    0.70
  -6   6  -1    3.60    0.60
   6   6   1    4.90    0.70
  -8  -6  -1   40.40    1.60
   8  -6   1   41.60    1.50
   8  -6   1   35.20    1.80
   8  -6   1   39.20    1.90
   8  -6   1   36.40    1.70
  -8  -6  -1   38.50    1.90
   8  -6   1   38.90    1.80
   8  -6   1   36.10    1.90
  -8  -6  -1   36.00    1.90
   8  -6   1   40.10    1.70
  -8  -6  -1   38.10    1.80
   8  -6   1   35.20    1.70
  -8  -6  -1   41.50    1.80
   8   6   1   37.60    1.80
   8   6   1   37.00    1.80
  -8   6  -1   36.10    1.70
   8   6   1   34.80    1.80
   8   6   1   34.10    1.70
   8   6   1   36.70    1.90
   8   6   1   35.40    1.90
  10  -6   1  105.99    4.00
  10  -6   1  104.09    4.30
  10  -6   1  103.89    4.00
 -10  -6  -1  109.79    4.20
 -10  -6  -1  109.89    3.80
  10  -6   1  106.19    4.20
 -10  -6  -1  107.19    4.20
  10  -6   1  104.79    4.30
 -10  -6  -1  112.29    3.90
  10  -6   1  112.99    4.10
 -10  -6  -1  102.99    4.30
  10  -6   1  107.59    4.10
  10  -6   1  107.99    3.90
  10   6   1  105.09    4.10
  10   6   1  103.69    3.90
  10   6   1  105.29    4.20
  10   6   1  101.49    4.30
  10   6   1  104.59    4.20
  10   6   1  104.99    4.20
 -12  -6  -1    2.10    0.40
  12  -6   1    3.40    0.60
 -12  -6  -1    2.90    0.40
  12  -6   1    3.00    0.70
  12  -6   1    2.70    0.50
 -12  -6  -1    2.30    0.60
  12  -6   1    2.20    0.60
 -12  -6  -1    3.00    0.80
 -12  -6  -1    2.80    0.70
  12  -6   1    2.70    0.70
  12  -6   1    2.70    0.50
  12   6   1    2.60    0.70
  12   6   1    3.60    0.70
  12   6   1    2.00    0.60
  12   6   1    2.20    0.60
  12   6   1    2.10    0.60
  14  -6   1    2.00    0.60
 -14  -6  -1    0.80    0.40
  14  -6   1   -0.30    0.20
 -14  -6  -1    0.00    0.40
 -14  -6  -1    1.30    0.60
  14  -6   1   -0.20    0.30
 -14  -6  -1    0.80    0.40
  14  -6   1    0.90    0.40
  14  -6   1    0.90    0.50
  14  -6   1    0.30    0.60
  14  -6   1   -0.10    0.20
  14  -6   1    0.70    0.30
 -14  -6  -1    1.30    0.70
  14   6   1    0.90    0.60
  14   6   1    2.10    0.80
  14   6   1    1.00    0.40
  14   6   1   -0.30    0.40
  14   6   1    0.70    0.60
  14   6   1    1.00    0.60
  14   6   1    0.50    0.60
  16  -6   1    3.60    0.70
  16  -6   1    3.80    0.60
  16  -6   1    3.50    0.50
 -16  -6  -1    4.10    0.60
 -16  -6  -1    3.50    0.80
  16  -6   1    4.90    0.90
  16  -6   1    4.80    0.60
  16  -6   1    3.40    0.50
  16  -6   1    3.20    0.80
 -16  -6  -1    4.10    0.80
  16  -6   1    2.60    0.70
 -16  -6  -1    4.80    0.90
  16   6   1    5.10    0.80
  16   6   1    2.00    0.70
  16   6   1    3.10    0.50
  16   6   1    4.10    0.80
  16   6   1    5.60    1.00
  16   6   1    2.80    0.80
  16   6   1    3.90    0.80
 -18  -6  -1   -0.10    0.80
  18  -6   1    0.70    0.50
 -18  -6  -1    0.20    0.70
  18  -6   1    1.00    0.80
  18  -6   1    0.70    0.80
  18  -6   1    0.20    0.70
 -18  -6  -1    0.10    0.70
  18  -6   1    0.10    0.40
  18  -6   1    0.60    0.40
  18  -6   1    0.40    0.60
  18  -6   1    0.30    0.50
  18   6   1    1.70    0.70
  18   6   1    0.00    0.70
  18   6   1    0.10    0.20
  18   6   1    1.20    0.70
  18   6   1   -0.30    0.70
  18   6   1    0.60    0.60
  18   6   1    0.50    0.20
  18   6   1   -0.20    0.60
  20  -6   1    5.60    0.60
  20  -6   1    4.90    0.70
 -20  -6  -1    3.90    1.00
  20  -6   1    4.50    0.50
  20  -6   1    5.30    0.90
  20  -6   1    5.50    0.70
  20  -6   1    5.90    0.60
 -20  -6  -1    5.10    1.10
  20  -6   1    6.00    0.90
  20  -6   1    6.70    1.10
  20  -6   1    5.60    1.00
 -20  -6  -1    5.20    1.00
  20   6   1    3.50    0.80
 -20   6  -1    4.70    1.10
  20   6   1    3.20    0.80
  20   6   1    5.40    1.00
  20   6   1    4.80    0.90
  20   6   1    5.70    0.90
  20   6   1    5.30    1.10
  22  -6   1   11.30    1.00
  22  -6   1   11.40    1.30
  22  -6   1   12.40    1.60
 -22  -6  -1   12.80    1.50
  22  -6   1   11.10    1.00
  22  -6   1   10.00    1.30
  22  -6   1   13.60    1.30
  22  -6   1   13.60    0.70
 -22  -6  -1   11.20    1.40
 -22  -6  -1   14.00    1.40
  22  -6   1   11.30    0.60
  22   6   1   10.60    1.20
  22   6   1   11.90    1.30
  22   6   1   12.00    1.20
  22   6   1   12.50    1.20
  22   6   1   12.00    1.40
 -22   6  -1   11.90    1.40
  22   6   1   11.80    1.50
  24  -6   1    5.60    0.80
 -24  -6  -1    3.00    1.00
  24  -6   1    6.30    0.80
  24  -6   1    4.80    1.20
 -24  -6  -1    3.60    1.10
  24  -6   1    5.00    1.00
  24  -6   1    7.10    1.20
 -24  -6  -1    4.60    1.10
  24  -6   1    5.60    1.40
  24   6   1    5.80    0.90
  24   6   1    6.10    1.00
  24   6   1    5.20    1.20
 -24   6  -1    4.20    1.10
  24   6   1    3.90    0.90
  24   6   1    6.70    1.20
  24   6   1    3.70    1.00
  26  -6   1    3.90    0.70
 -26  -6  -1    4.10    1.10
  26  -6   1    6.50    1.30
 -26  -6  -1    2.40    1.00
  26  -6   1    3.50    1.00
  26  -6   1    3.30    0.70
 -26  -6  -1    3.10    1.20
  26  -6   1    1.40    1.10
  26  -6   1    4.10    1.10
  26   6   1    4.00    0.80
  26   6   1    4.20    0.90
  26   6   1    4.50    1.00
  26   6   1    5.00    1.20
  26   6   1    5.40    1.00
  26   6   1    5.00    1.00
 -26   6  -1    5.60    1.20
  26   6   1    4.60    1.30
 -26   6  -1    2.40    1.00
  28  -6   1   -1.10    0.80
  28  -6   1   -1.10    0.50
  28  -6   1    0.10    0.60
 -28  -6  -1    0.40    1.20
  28  -6   1    1.20    0.90
 -28  -6  -1    0.20    0.90
  28  -6   1   -0.30    1.10
  28  -6   1   -0.40    1.00
 -28  -6  -1    0.00    0.90
  28   6   1    1.00    0.90
  28   6   1   -0.50    1.00
 -28   6  -1   -1.70    0.90
  28   6   1    0.30    0.80
  28   6   1    0.70    0.80
  28   6   1    0.40    0.70
  28   6   1    1.20    0.90
 -28   6  -1    0.30    0.90
  28   6   1    0.40    0.70
  30  -6   1    4.20    0.80
 -30  -6  -1    4.00    1.20
  30  -6   1    3.80    1.30
  30  -6   1    4.10    0.80
 -30  -6  -1    2.50    1.30
 -30  -6  -1    2.70    1.40
  30  -6   1    3.80    1.20
 -30   6  -1    4.60    1.40
  30   6   1    4.00    1.30
  30   6   1    5.00    1.00
  30   6   1    3.50    1.00
  30   6   1    4.40    0.90
  30   6   1    6.60    1.50
 -30   6  -1    2.80    1.40
  30   6   1    4.70    1.10
 -29  -7   1    0.70    1.20
  29  -7  -1   -0.70    1.40
  29  -7  -1    3.50    1.30
  29  -7  -1    1.60    1.10
  29  -7  -1    0.60    0.70
 -29  -7   1    0.60    1.00
 -29  -7   1    2.90    1.20
  29  -7  -1    0.60    0.70
 -29   7   1   -1.10    1.10
  29   7  -1    1.20    0.80
  29   7  -1    2.40    1.20
  29   7  -1    1.00    1.00
  29   7  -1    1.30    0.90
  29   7  -1    1.60    1.00
 -29   7   1    1.30    1.10
  29   7  -1    1.10    1.00
  27  -7  -1    0.00    0.70
  27  -7  -1   -0.80    0.80
  27  -7  -1   -2.80    1.00
  27  -7  -1   -0.50    0.80
  27  -7  -1    1.00    1.00
  27  -7  -1   -0.70    0.60
 -27  -7   1    1.10    1.00
 -27  -7   1    0.10    0.90
 -27  -7   1   -0.40    1.10
  27   7  -1    0.70    0.70
 -27   7   1   -1.20    0.90
  27   7  -1    2.60    1.20
  27   7  -1   -2.20    0.80
  27   7  -1    0.00    0.80
 -27   7   1    0.90    1.00
  27   7  -1    1.10    0.90
  27   7  -1    0.20    1.00
  27   7  -1   -0.70    0.80
 -25  -7   1    4.20    1.10
  25  -7  -1    0.80    1.10
  25  -7  -1    0.20    0.60
  25  -7  -1    1.80    0.90
  25  -7  -1   -0.40    0.70
  25  -7  -1    1.60    0.40
  25  -7  -1    1.00    0.90
 -25  -7   1    4.00    1.10
 -25  -7   1    0.80    0.90
  25  -7  -1    1.70    1.00
  25   7  -1    2.10    0.90
  25   7  -1    0.40    0.90
 -25   7   1    2.70    1.00
  25   7  -1    1.20    0.80
 -25   7   1    2.30    1.00
  25   7  -1    1.10    0.90
  25   7  -1    3.40    0.90
  25   7  -1    1.10    0.80
  25   7  -1    2.80    1.00
 -23  -7   1    0.70    0.90
  23  -7  -1    1.50    0.50
 -23  -7   1    1.70    0.90
  23  -7  -1    1.30    1.00
  23  -7  -1    1.20    0.70
  23  -7  -1    3.40    1.00
  23  -7  -1    1.80    1.00
 -23  -7   1    1.00    0.80
  23  -7  -1    1.20    0.70
  23  -7  -1    2.20    0.90
  23   7  -1    1.00    0.80
 -23   7   1    3.30    1.00
  23   7  -1    2.60    0.90
  23   7  -1    0.70    0.90
  23   7  -1    1.30    0.90
  23   7  -1    1.20    0.80
  23   7  -1    0.10    0.90
 -21  -7   1   -0.60    0.70
 -21  -7   1    0.30    0.80
  21  -7  -1    0.20    0.60
  21  -7  -1    0.10    0.40
  21  -7  -1   -1.50    0.90
  21  -7  -1   -0.10    0.90
 -21  -7   1    0.50    0.80
  21  -7  -1   -1.10    0.60
  21  -7  -1   -0.10    0.60
  21  -7  -1   -0.40    0.80
  21   7  -1   -0.30    0.30
  21   7  -1   -0.10    0.80
  21   7  -1    1.20    0.80
 -21   7   1    1.00    0.80
  21   7  -1    0.40    0.70
  21   7  -1   -1.50    0.70
  21   7  -1   -1.30    0.80
  21   7  -1   -0.70    0.80
  19  -7  -1   38.40    1.90
  19  -7  -1   37.50    2.00
  19  -7  -1   35.20    1.80
  19  -7  -1   36.00    2.10
 -19  -7   1   37.50    2.20
 -19  -7   1   38.70    2.20
  19  -7  -1   36.50    1.70
  19  -7  -1   37.70    2.20
  19  -7  -1   34.80    2.20
 -19  -7   1   35.40    2.10
 -19   7   1   37.20    2.10
  19   7  -1   35.20    2.00
  19   7  -1   32.90    2.00
  19   7  -1   35.80    2.20
  19   7  -1   37.50    2.10
  19   7  -1   36.60    2.10
  19   7  -1   40.00    2.10
  19   7  -1   36.70    1.60
  17  -7  -1    5.70    0.90
 -17  -7   1    6.70    1.10
  17  -7  -1    7.30    0.80
  17  -7  -1    6.90    0.80
  17  -7  -1    5.10    1.00
 -17  -7   1    6.70    1.00
 -17  -7   1    6.70    1.00
  17  -7  -1    7.50    0.80
  17  -7  -1    6.50    1.00
  17  -7  -1    6.80    0.90
  17   7  -1    7.80    1.20
  17   7  -1    7.20    1.00
  17   7  -1    8.30    1.20
  17   7  -1    6.80    1.00
  17   7  -1    6.10    0.70
  17   7  -1    7.00    1.00
  17   7  -1    7.00    1.00
  15  -7  -1   30.10    1.50
 -15  -7   1   30.90    1.50
  15  -7  -1   29.40    1.90
  15  -7  -1   30.50    1.60
  15  -7  -1   28.40    1.60
 -15  -7   1   29.10    1.80
 -15  -7   1   31.50    1.90
  15  -7  -1   29.70    1.90
  15  -7  -1   30.00    1.70
 -15  -7   1   27.80    1.80
  15  -7  -1   30.00    1.60
  15   7  -1   31.90    1.80
  15   7  -1   29.00    1.70
  15   7  -1   29.80    1.80
  15   7  -1   30.90    1.80
  15   7  -1   31.90    1.90
  15   7  -1   29.80    1.50
  15   7  -1   31.50    2.00
  13  -7  -1   12.90    1.00
 -13  -7   1   12.50    0.90
  13  -7  -1   11.90    1.00
 -13  -7   1   13.00    0.90
  13  -7  -1   12.20    1.00
 -13  -7   1   11.70    1.10
 -13  -7   1   13.90    1.30
  13  -7  -1   12.10    1.10
  13  -7  -1   11.10    1.20
  13  -7  -1   11.30    1.20
  13  -7  -1   12.10    0.90
  13   7  -1   10.80    1.10
 -13   7   1   12.20    0.90
  13   7  -1   12.70    1.10
  13   7  -1   12.90    1.20
  13   7  -1   12.40    1.20
  13   7  -1   11.10    0.90
  11  -7  -1    0.00    0.50
  11  -7  -1   -0.10    0.20
  11  -7  -1    0.30    0.50
 -11  -7   1    0.40    0.40
 -11  -7   1   -0.20    0.40
  11  -7  -1   -0.20    0.50
  11  -7  -1    0.40    0.50
 -11  -7   1    0.30    0.60
  11  -7  -1    0.70    0.50
  11  -7  -1   -0.60    0.60
  11  -7  -1    0.70    0.60
  11  -7  -1    0.50    0.50
 -11  -7   1   -0.40    0.30
 -11  -7   1    1.10    0.60
  11   7  -1    0.30    0.40
  11   7  -1   -0.60    0.60
  11   7  -1    0.40    0.50
  11   7  -1    0.80    0.60
 -11   7   1   -0.40    0.40
  11   7  -1    0.60    0.60
  11   7  -1   -0.60    0.60
  11   7  -1    0.10    0.60
  -9  -7   1   -0.40    0.40
   9  -7  -1    0.20    0.50
  -9  -7   1    0.20    0.50
   9  -7  -1   -0.20    0.60
   9  -7  -1    0.10    0.50
   9  -7  -1   -0.60    0.40
   9  -7  -1    0.50    0.60
  -9  -7   1    0.30    0.40
  -9  -7   1    0.00    0.50
   9  -7  -1    0.10    0.60
   9  -7  -1    0.30    0.30
  -9  -7   1    0.30    0.30
   9  -7  -1    0.10    0.50
  -9  -7   1   -0.20    0.50
   9  -7  -1   -0.10    0.50
  -9  -7   1    0.30    0.50
   9   7  -1   -0.10    0.60
   9   7  -1    0.20    0.50
   9   7  -1    0.80    0.60
   9   7  -1   -0.10    0.50
   9   7  -1   -0.90    0.60
  -9   7   1   -0.50    0.40
   9   7  -1    0.00    0.60
  -7  -7   1   15.10    1.20
   7  -7  -1   17.00    1.20
  -7  -7   1   17.50    1.00
  -7  -7   1   18.10    1.20
   7  -7  -1   16.70    1.20
   7  -7  -1   15.60    1.20
   7  -7  -1   15.80    1.20
  -7  -7   1   15.50    1.10
   7  -7  -1   16.20    1.20
  -7  -7   1   17.90    1.20
   7  -7  -1   14.60    1.10
  -7  -7   1   17.90    1.20
   7  -7  -1   14.90    1.00
   7   7  -1   17.70    1.20
   7   7  -1   15.70    1.20
   7   7  -1   16.70    1.20
   7   7  -1   15.70    1.10
  -7   7   1   15.90    1.00
   7   7  -1   17.40    1.40
  -7   7   1   17.60    1.20
  -7   7   1   16.20    1.10
  -5  -7   1    2.20    0.70
   5  -7  -1    3.50    0.70
   5  -7  -1    3.50    0.50
  -5  -7   1    4.00    0.70
   5  -7  -1    3.90    0.70
   5  -7  -1    3.60    0.70
  -5  -7   1    3.30    0.60
   5  -7  -1    3.70    0.70
   5  -7  -1    3.40    0.70
  -5  -7   1    3.20    0.60
   5  -7  -1    3.20    0.70
  -5  -7   1    3.40    0.70
  -5  -7   1    3.90    0.60
   5   7  -1    3.90    0.70
  -5   7   1    3.20    0.60
   5   7  -1    1.90    0.60
   5   7  -1    3.70    0.70
   5   7  -1    3.40    0.70
   5   7  -1    2.40    0.70
  -5   7   1    3.40    0.70
  -5   7   1    2.70    0.60
   3  -7  -1  219.08    8.10
  -3  -7   1  229.48    8.20
   3  -7  -1  226.98    8.30
  -3  -7   1  226.28    8.10
  -3  -7   1  219.98    8.30
   3  -7  -1  221.98    8.40
  -3  -7   1  231.58    8.00
   3  -7  -1  226.58    8.20
   3  -7  -1  208.98    8.20
  -3  -7   1  228.78    8.10
   3  -7  -1  229.78    7.90
  -3  -7   1  223.88    8.20
   3  -7  -1  227.08    8.20
  -3  -7   1  216.38    8.30
   3   7  -1  222.08    8.20
   3   7  -1  219.98    8.30
   3   7  -1  220.48    7.90
  -3   7   1  239.78    8.20
  -3   7   1  224.58    8.10
   3   7  -1  223.78    8.20
  -3   7   1  226.38    8.30
   3   7  -1  221.98    8.40
  -3   7   1  222.58    7.90
  -3   7   1  234.28    8.20
  -1  -7   1  152.48    5.60
  -1  -7   1  144.99    5.40
  -1  -7   1  147.39    5.80
   1  -7  -1  146.39    5.70
  -1  -7   1  154.18    5.60
   1  -7  -1  148.39    5.60
   1  -7  -1  148.09    5.60
  -1  -7   1  150.18    5.60
   1  -7  -1  146.69    5.60
  -1  -7   1  153.78    5.70
  -1  -7   1  143.79    5.60
   1  -7  -1  145.79    5.50
   1  -7  -1  153.68    5.40
  -1   7   1  149.88    5.60
   1   7  -1  147.79    5.70
  -1   7   1  152.58    5.70
  -1   7   1  149.39    5.40
   1   7  -1  148.79    5.60
   1   7  -1  142.39    5.60
  -1   7   1  148.39    5.60
  -1   7   1  144.19    5.60
   1   7  -1  151.18    5.40
   1   7  -1  155.58    5.60
  -1  -7  -1  248.68    9.10
   1  -7   1  236.28    9.10
   1  -7   1  253.17    9.20
   1  -7   1  238.98    9.00
  -1  -7  -1  237.18    9.00
   1  -7   1  242.88    9.00
   1  -7   1  242.78    8.90
  -1  -7  -1  251.47    9.00
  -1  -7  -1  253.27    9.10
  -1  -7  -1  260.07    8.80
  -1  -7  -1  253.87    9.00
   1  -7   1  255.47    9.00
  -1   7  -1  257.47    9.00
   1   7   1  240.08    9.00
   1   7   1  249.58    9.20
  -1   7  -1  250.37    8.70
   1   7   1  244.08    8.70
   1   7   1  257.27    9.00
   1   7   1  249.97    9.10
  -1   7  -1  256.87    9.10
  -1   7  -1  249.08    9.20
  -1   7  -1  252.37    9.00
  -3  -7  -1   66.39    2.80
   3  -7   1   65.49    2.80
  -3  -7  -1   63.39    2.80
  -3  -7  -1   62.69    2.60
  -3  -7  -1   63.99    2.80
  -3  -7  -1   63.09    2.80
   3  -7   1   64.69    2.80
   3  -7   1   62.99    2.70
   3  -7   1   61.29    2.80
  -3  -7  -1   66.69    2.70
   3  -7   1   64.99    2.80
  -3  -7  -1   65.49    2.80
   3  -7   1   61.79    2.70
  -3   7  -1   68.59    2.70
  -3   7  -1   71.09    2.70
   3   7   1   63.59    2.80
  -3   7  -1   63.49    2.70
  -3   7  -1   68.99    2.80
   3   7   1   64.99    2.70
   3   7   1   65.39    2.80
   3   7   1   63.09    2.80
   3   7   1   66.49    2.80
   5  -7   1  139.59    5.60
  -5  -7  -1  146.29    5.40
  -5  -7  -1  163.28    5.70
  -5  -7  -1  153.08    5.60
  -5  -7  -1  144.59    5.70
  -5  -7  -1  153.28    5.40
   5  -7   1  140.69    5.50
  -5  -7  -1  147.99    5.60
   5  -7   1  143.19    5.70
   5  -7   1  134.59    5.50
   5  -7   1  145.79    5.50
   5  -7   1  144.69    5.50
  -5  -7  -1  152.38    5.50
   5   7   1  142.39    5.50
   5   7   1  147.79    5.40
  -5   7  -1  148.99    5.30
  -5   7  -1  149.29    5.50
   5   7   1  145.89    5.60
   5   7   1  145.09    5.70
   5   7   1  144.09    5.60
  -5   7  -1  147.59    5.60
   7  -7   1   24.70    1.40
   7  -7   1   25.60    1.40
  -7  -7  -1   26.70    1.50
  -7  -7  -1   24.30    1.40
   7  -7   1   26.20    1.20
   7  -7   1   24.10    1.60
   7  -7   1   24.60    1.40
   7  -7   1   24.50    1.40
   7  -7   1   23.40    1.40
  -7  -7  -1   24.80    1.40
  -7  -7  -1   23.80    1.50
  -7  -7  -1   21.90    1.50
  -7  -7  -1   25.00    1.20
   7  -7   1   24.50    1.50
  -7   7  -1   26.20    1.30
   7   7   1   21.50    1.30
   7   7   1   23.00    1.50
  -7   7  -1   23.60    1.40
   7   7   1   24.00    1.50
   7   7   1   24.60    1.50
   7   7   1   24.60    1.50
  -7   7  -1   23.70    1.40
   9  -7   1   12.70    1.00
   9  -7   1   12.80    0.70
   9  -7   1   10.20    1.00
  -9  -7  -1   13.90    1.10
  -9  -7  -1   12.90    1.20
   9  -7   1   12.70    1.20
  -9  -7  -1   12.50    0.80
  -9  -7  -1   13.10    1.20
   9  -7   1    9.90    0.90
   9  -7   1   12.10    1.10
   9  -7   1   11.40    1.10
   9  -7   1   13.00    0.90
  -9  -7  -1   13.30    1.10
   9  -7   1   12.50    1.00
   9   7   1   11.10    1.10
  -9   7  -1   10.60    0.90
   9   7   1   10.90    1.00
   9   7   1   10.00    1.00
   9   7   1   10.00    1.00
   9   7   1   11.20    1.00
  11  -7   1   14.20    1.30
 -11  -7  -1   12.80    1.10
  11  -7   1   12.40    1.00
 -11  -7  -1   13.10    1.30
  11  -7   1   13.60    0.90
  11  -7   1   13.90    1.00
  11  -7   1   14.20    1.30
  11  -7   1   11.00    1.00
  11  -7   1   13.60    1.20
 -11  -7  -1   12.80    0.80
  11  -7   1   15.30    1.10
  11   7   1   14.60    1.20
  11   7   1   10.70    1.10
  11   7   1   13.00    1.00
  11   7   1   12.90    1.10
 -11   7  -1   13.70    0.90
  11   7   1   12.10    1.10
  13  -7   1   74.89    3.30
  13  -7   1   74.09    3.10
 -13  -7  -1   73.89    3.40
  13  -7   1   67.89    3.10
  13  -7   1   78.89    3.00
  13  -7   1   74.39    3.30
 -13  -7  -1   78.09    3.30
 -13  -7  -1   74.09    2.80
  13  -7   1   71.39    3.10
  13   7   1   73.59    3.20
  13   7   1   68.99    3.10
  13   7   1   77.29    3.30
  13   7   1   75.79    3.20
 -15  -7  -1    2.30    0.80
  15  -7   1    0.80    0.50
  15  -7   1    1.60    0.60
 -15  -7  -1    2.00    0.70
  15  -7   1    0.80    0.60
  15  -7   1    2.30    0.80
 -15  -7  -1    1.90    0.70
  15  -7   1    1.00    0.50
  15  -7   1    1.30    0.80
  15  -7   1    1.50    0.60
  15   7   1    1.70    0.50
  15   7   1    1.10    0.70
  15   7   1    1.30    0.70
  15   7   1    1.20    0.70
  15   7   1    2.00    0.80
  15   7   1    1.80    0.70
  17  -7   1   24.90    1.40
  17  -7   1   24.50    1.70
  17  -7   1   27.20    1.80
 -17  -7  -1   24.10    1.70
 -17  -7  -1   24.60    1.80
  17  -7   1   25.70    1.30
  17  -7   1   25.40    1.50
 -17  -7  -1   26.40    1.80
  17  -7   1   28.50    1.60
  17  -7   1   21.80    1.60
  17   7   1   23.40    1.30
  17   7   1   27.00    1.70
  17   7   1   24.40    1.60
  17   7   1   23.10    1.80
  17   7   1   22.80    1.80
  17   7   1   25.90    1.70
  17   7   1   24.90    1.70
  19  -7   1    1.00    0.60
 -19  -7  -1    1.60    0.90
  19  -7   1    1.40    0.90
  19  -7   1    1.90    0.50
 -19  -7  -1    1.80    1.00
  19  -7   1    0.30    0.80
 -19  -7  -1   -0.40    0.80
  19  -7   1    0.30    0.70
  19  -7   1    2.00    0.90
  19  -7   1    1.40    0.60
  19   7   1    1.00    0.80
  19   7   1    0.10    0.80
  19   7   1    0.00    0.70
  19   7   1    0.70    0.80
  19   7   1    1.80    0.80
  19   7   1    1.20    0.40
  19   7   1    1.60    0.80
 -21  -7  -1   11.50    1.50
  21  -7   1    8.30    1.30
  21  -7   1   11.40    1.10
  21  -7   1   12.70    1.20
  21  -7   1   12.30    1.30
  21  -7   1    9.30    1.00
  21  -7   1   10.70    0.80
 -21  -7  -1   10.90    1.40
 -21  -7  -1   12.00    1.40
  21  -7   1   12.80    1.50
  21   7   1   12.50    1.20
  21   7   1   10.40    1.20
  21   7   1    8.90    1.20
  21   7   1   12.00    1.60
  21   7   1   10.10    1.30
 -21   7  -1   11.20    1.40
  21   7   1   12.40    1.30
  23  -7   1    2.10    0.70
 -23  -7  -1    1.50    1.00
  23  -7   1   -1.00    0.90
  23  -7   1   -0.20    0.60
  23  -7   1    0.10    0.90
  23  -7   1    0.60    0.80
  23  -7   1    1.50    1.00
 -23  -7  -1   -0.90    0.80
  23  -7   1   -0.30    0.30
 -23  -7  -1    0.30    0.90
  23  -7   1    0.20    0.30
  23   7   1   -0.70    0.80
  23   7   1    2.20    0.80
  23   7   1    1.10    0.80
 -23   7  -1    2.40    1.10
  23   7   1   -1.10    0.80
  23   7   1    0.20    0.80
  23   7   1   -0.60    0.80
  23   7   1    1.40    0.80
  25  -7   1   41.70    2.40
 -25  -7  -1   42.60    2.70
  25  -7   1   40.40    2.70
  25  -7   1   38.60    2.00
  25  -7   1   37.80    2.50
  25  -7   1   41.90    2.10
 -25  -7  -1   36.40    2.50
 -25  -7  -1   37.60    2.60
 -25   7  -1   39.50    2.50
  25   7   1   42.90    2.40
  25   7   1   38.50    2.40
  25   7   1   37.60    2.30
  25   7   1   39.10    2.30
  25   7   1   46.20    2.80
  25   7   1   39.90    2.20
  25   7   1   40.20    2.70
  27  -7   1    2.20    0.90
 -27  -7  -1   -0.10    1.00
  27  -7   1    2.00    0.70
  27  -7   1    1.10    1.20
 -27  -7  -1    2.30    1.10
 -27  -7  -1    1.90    1.10
  27  -7   1    2.00    1.00
  27  -7   1    0.90    0.70
 -27   7  -1    3.20    1.20
  27   7   1    3.10    1.00
 -27   7  -1    3.40    1.20
  27   7   1    1.00    1.00
  27   7   1    3.00    1.20
  27   7   1    2.20    0.80
  27   7   1    1.40    0.90
  27   7   1    3.00    1.00
  27   7   1    2.50    0.90
  29  -7   1    6.20    1.30
  29  -7   1    4.90    0.90
 -29  -7  -1   -0.20    1.20
 -29  -7  -1    3.40    1.40
  29  -7   1    3.70    0.80
  29  -7   1    3.80    1.40
 -29  -7  -1    6.90    1.60
  29  -7   1    4.40    1.20
 -29   7  -1    2.40    1.40
 -29   7  -1    4.50    1.30
  29   7   1    5.00    1.20
  29   7   1    4.00    1.30
  29   7   1    5.30    1.00
  29   7   1    5.20    1.10
  29   7   1    4.70    1.10
  29   7   1    5.60    1.20
  29   7   1    6.70    1.50
  28  -8  -1    1.00    0.80
 -28  -8   1    0.70    1.30
  28  -8  -1    0.00    1.40
 -28  -8   1    3.30    1.40
  28  -8  -1    2.30    1.10
  28  -8  -1    1.90    1.20
 -28  -8   1    2.30    1.20
  28  -8  -1    2.30    0.90
  28   8  -1    2.90    1.10
  28   8  -1    3.60    1.20
 -28   8   1    4.40    1.40
  28   8  -1    3.10    1.10
 -28   8   1    2.20    1.20
  28   8  -1    1.90    1.00
  28   8  -1    1.50    1.10
  28   8  -1    4.30    1.00
  28   8  -1    0.90    1.00
  26  -8  -1    0.20    1.10
  26  -8  -1   -0.30    0.70
 -26  -8   1    2.00    1.20
 -26  -8   1   -0.70    1.10
  26  -8  -1    0.10    0.90
  26  -8  -1    0.70    0.90
  26  -8  -1   -0.60    0.70
 -26  -8   1    1.00    1.00
  26  -8  -1    0.60    0.40
 -26   8   1    1.10    1.20
  26   8  -1   -1.30    0.90
 -26   8   1   -1.20    0.90
  26   8  -1    0.50    0.90
  26   8  -1    1.50    1.00
  26   8  -1    1.10    0.90
  26   8  -1    0.90    0.90
  26   8  -1   -1.10    0.80
  26   8  -1    0.90    1.00
  24  -8  -1    0.00    0.60
 -24  -8   1    1.50    1.10
 -24  -8   1    0.00    0.90
 -24  -8   1    0.30    1.00
  24  -8  -1    1.00    0.90
  24  -8  -1    0.30    0.90
  24  -8  -1    0.50    0.50
  24  -8  -1    0.40    0.90
  24  -8  -1    0.90    0.70
  24   8  -1    0.40    0.90
  24   8  -1    0.60    0.90
 -24   8   1    2.00    1.00
  24   8  -1    0.80    0.90
  24   8  -1    0.50    1.20
  24   8  -1    0.30    1.10
  24   8  -1    1.40    0.90
 -22  -8   1    3.40    1.00
  22  -8  -1    2.60    1.00
  22  -8  -1    1.60    0.60
  22  -8  -1    3.20    0.90
  22  -8  -1    3.00    0.80
  22  -8  -1    1.90    1.20
  22  -8  -1    0.80    0.80
  22  -8  -1    2.20    0.80
 -22  -8   1    2.40    0.90
 -22  -8   1    2.80    1.20
 -22   8   1    1.90    0.90
  22   8  -1    2.10    1.00
  22   8  -1    1.50    1.00
  22   8  -1    3.70    1.00
  22   8  -1    2.30    0.90
  22   8  -1    2.10    0.90
  22   8  -1    1.60    0.90
  22   8  -1    2.20    0.40
  20  -8  -1    9.50    1.30
  20  -8  -1    5.80    0.90
 -20  -8   1    9.80    1.40
  20  -8  -1    7.90    0.90
  20  -8  -1    6.90    1.10
 -20  -8   1    8.40    1.20
  20  -8  -1    9.90    1.30
 -20  -8   1    7.80    1.30
  20  -8  -1    9.40    1.10
  20  -8  -1    8.50    1.00
  20   8  -1    9.10    1.40
  20   8  -1    8.10    1.20
  20   8  -1    8.70    1.20
  20   8  -1    9.40    1.20
 -20   8   1    7.50    1.20
  20   8  -1    7.90    0.70
  20   8  -1    8.00    1.30
  20   8  -1    8.50    1.20
  18  -8  -1    0.40    0.60
  18  -8  -1    0.50    0.60
 -18  -8   1   -0.10    0.90
 -18  -8   1    0.30    0.70
  18  -8  -1    0.10    0.80
  18  -8  -1    0.40    0.90
 -18  -8   1    0.70    0.80
  18  -8  -1    0.30    0.50
  18  -8  -1    0.20    0.60
  18  -8  -1    0.40    0.80
  18   8  -1    0.40    0.80
  18   8  -1    0.00    0.80
  18   8  -1   -0.20    0.50
 -18   8   1    0.00    0.80
  18   8  -1    0.30    0.80
  18   8  -1    1.40    0.80
  18   8  -1   -1.80    0.90
  16  -8  -1    0.40    0.70
  16  -8  -1    1.60    0.90
  16  -8  -1    1.20    0.60
  16  -8  -1    0.80    0.80
 -16  -8   1    1.30    0.90
 -16  -8   1    1.90    0.70
  16  -8  -1    1.80    0.60
 -16  -8   1    1.80    0.90
  16  -8  -1    0.50    0.70
  16  -8  -1    0.90    0.70
  16   8  -1    0.80    0.80
  16   8  -1    0.30    0.80
  16   8  -1    1.40    0.80
  16   8  -1    0.90    0.80
  16   8  -1    0.30    0.90
  16   8  -1    1.60    0.60
  14  -8  -1   30.00    1.50
  14  -8  -1   24.90    1.70
 -14  -8   1   28.60    1.80
  14  -8  -1   28.20    1.80
  14  -8  -1   25.00    1.60
  14  -8  -1   27.60    1.60
 -14  -8   1   29.60    1.90
  14  -8  -1   25.40    1.60
 -14  -8   1   26.80    1.70
  14  -8  -1   27.60    1.90
  14   8  -1   26.70    1.80
  14   8  -1   26.50    1.50
  14   8  -1   25.80    1.80
  14   8  -1   26.30    1.80
  14   8  -1   29.30    1.90
  14   8  -1   28.40    1.80
 -12  -8   1   64.49    2.60
  12  -8  -1   65.49    2.90
  12  -8  -1   68.59    2.70
  12  -8  -1   65.79    3.00
  12  -8  -1   64.79    2.90
  12  -8  -1   61.29    2.90
  12  -8  -1   62.69    2.80
  12  -8  -1   67.79    3.10
 -12  -8   1   70.29    3.00
 -12  -8   1   66.19    3.00
 -12  -8   1   65.99    3.10
  12   8  -1   64.39    2.80
  12   8  -1   62.19    3.10
  12   8  -1   62.69    2.90
  12   8  -1   65.79    3.00
  12   8  -1   63.09    3.00
  12   8  -1   65.49    3.00
 -12   8   1   64.29    2.70
  10  -8  -1    0.20    0.70
 -10  -8   1    0.10    0.60
 -10  -8   1    0.20    0.50
  10  -8  -1   -0.30    0.60
 -10  -8   1    0.30    0.60
  10  -8  -1   -0.50    0.60
  10  -8  -1   -0.70    0.40
  10  -8  -1    0.60    0.60
  10  -8  -1   -0.10    0.60
 -10  -8   1    0.90    0.60
  10  -8  -1    1.00    0.80
 -10  -8   1    0.10    0.60
  10   8  -1   -0.30    0.60
  10   8  -1    1.10    0.70
  10   8  -1   -0.20    0.70
  10   8  -1   -0.40    0.60
  10   8  -1    0.10    0.60
  10   8  -1   -0.50    0.50
 -10   8   1   -0.60    0.50
  -8  -8   1    4.00    0.80
   8  -8  -1    4.60    0.80
  -8  -8   1    4.00    0.80
   8  -8  -1    3.90    0.80
   8  -8  -1    4.20    0.60
   8  -8  -1    2.50    0.70
  -8  -8   1    4.80    0.60
   8  -8  -1    3.50    0.80
  -8  -8   1    3.50    0.80
   8  -8  -1    4.20    0.80
  -8  -8   1    3.70    0.70
   8  -8  -1    2.90    0.80
   8   8  -1    3.40    0.80
   8   8  -1    3.40    0.70
  -8   8   1    3.80    0.70
   8   8  -1    4.20    0.80
   8   8  -1    5.50    0.90
   8   8  -1    2.70    0.80
   6  -8  -1   -1.00    0.50
  -6  -8   1    0.20    0.60
  -6  -8   1   -0.70    0.60
  -6  -8   1   -0.40    0.50
   6  -8  -1    0.10    0.40
  -6  -8   1    0.80    0.60
  -6  -8   1    0.80    0.40
  -6  -8   1    0.70    0.60
   6  -8  -1    0.30    0.50
  -6  -8   1    0.10    0.30
   6  -8  -1    0.90    0.60
   6  -8  -1   -0.30    0.50
   6  -8  -1    0.60    0.50
   6  -8  -1    0.90    0.60
   6   8  -1    0.40    0.50
   6   8  -1   -0.10    0.60
   6   8  -1   -0.10    0.60
  -6   8   1   -0.50    0.40
   6   8  -1    0.20    0.70
  -6   8   1    0.10    0.50
   6   8  -1   -0.30    0.60
  -4  -8   1    3.90    0.60
  -4  -8   1    2.90    0.70
  -4  -8   1    0.60    0.40
   4  -8  -1    2.10    0.70
   4  -8  -1    2.80    0.70
  -4  -8   1    3.00    0.60
   4  -8  -1    3.00    0.50
  -4  -8   1    2.40    0.70
   4  -8  -1    2.00    0.70
  -4  -8   1    3.00    0.70
   4  -8  -1    3.10    0.70
  -4  -8   1    2.30    0.70
   4  -8  -1    2.40    0.60
  -4   8   1    2.80    0.60
   4   8  -1    3.90    0.80
   4   8  -1    1.80    0.60
   4   8  -1    2.70    0.70
   4   8  -1    2.60    0.70
  -4   8   1    2.70    0.60
  -4   8   1    2.80    0.70
   4   8  -1    2.50    0.70
  -2  -8   1    2.70    0.70
   2  -8  -1    1.80    0.70
   2  -8  -1   -0.30    0.20
  -2  -8   1    1.20    0.60
   2  -8  -1    1.50    0.60
   2  -8  -1    1.70    0.50
  -2  -8   1    0.20    0.50
  -2  -8   1    0.50    0.50
  -2  -8   1    0.90    0.60
  -2  -8   1    1.30    0.60
  -2  -8   1   -0.20    0.30
   2  -8  -1    0.30    0.60
   2  -8  -1    1.30    0.60
   2  -8  -1    0.60    0.60
   2   8  -1    0.30    0.50
  -2   8   1    0.60    0.60
  -2   8   1    0.80    0.60
  -2   8   1    0.30    0.60
   2   8  -1    1.00    0.60
   2   8  -1    2.10    0.60
   2   8  -1    1.00    0.60
  -2   8   1    2.30    0.60
  -2   8   1    1.50    0.60
   2   8  -1    0.70    0.60
   0  -8  -1   70.79    3.10
   0  -8   1   76.09    3.10
   0  -8   1   69.09    3.00
   0  -8   1   74.59    2.80
   0  -8   1   70.79    3.00
   0  -8   1   71.89    3.10
   0  -8   1   68.99    3.10
   0  -8  -1   67.39    2.90
   0  -8  -1   72.39    2.90
   0  -8  -1   68.29    3.00
   0  -8  -1   70.39    3.00
   0  -8  -1   69.89    3.10
   0   8   1   70.99    3.10
   0   8   1   68.09    3.00
   0   8   1   71.79    3.10
   0   8   1   69.69    3.00
   0   8  -1   71.29    3.00
   0   8  -1   69.19    2.90
   0   8   1   70.09    2.90
   0   8  -1   70.19    3.00
   0   8  -1   70.79    3.10
   0   8  -1   73.79    3.10
   2  -8   1    2.60    0.60
  -2  -8  -1    1.70    0.70
   2  -8   1    1.20    0.70
  -2  -8  -1    2.10    0.70
   2  -8   1    2.00    0.70
   2  -8   1    1.70    0.70
  -2  -8  -1    0.30    0.60
  -2  -8  -1    2.20    0.60
  -2  -8  -1    3.40    0.70
   2  -8   1    3.50    0.80
   2  -8   1    2.00    0.50
   2  -8   1    2.40    0.60
  -2  -8  -1    3.00    0.60
   2   8   1    1.40    0.60
   2   8   1    1.70    0.70
  -2   8  -1    0.50    0.50
  -2   8  -1    3.10    0.70
   2   8   1    1.90    0.70
  -2   8  -1    2.40    0.60
  -2   8  -1    2.80    0.70
  -2   8  -1    2.80    0.60
   2   8   1    2.40    0.60
   2   8   1    2.40    0.70
  -4  -8  -1    0.50    0.60
   4  -8   1    0.80    0.60
  -4  -8  -1    1.10    0.60
   4  -8   1    0.30    0.60
   4  -8   1    0.60    0.60
   4  -8   1    2.10    0.70
  -4  -8  -1    1.70    0.70
  -4  -8  -1    0.20    0.50
   4  -8   1    0.40    0.50
   4  -8   1    0.60    0.60
  -4  -8  -1   -0.10    0.60
  -4  -8  -1    0.80    0.50
  -4  -8  -1    0.10    0.40
   4  -8   1    0.40    0.40
   4   8   1    1.40    0.60
  -4   8  -1    0.90    0.60
  -4   8  -1    1.30    0.60
   4   8   1    1.00    0.60
   4   8   1    1.80    0.70
  -4   8  -1    1.60    0.70
   4   8   1    0.80    0.60
   4   8   1    1.10    0.70
   6  -8   1    2.30    0.70
   6  -8   1    1.10    0.60
   6  -8   1    2.50    0.70
  -6  -8  -1    2.10    0.80
  -6  -8  -1    1.80    0.70
   6  -8   1    1.40    0.80
  -6  -8  -1    1.90    0.70
  -6  -8  -1    2.40    0.50
   6  -8   1    3.10    0.70
   6  -8   1    2.10    0.70
   6  -8   1    2.10    0.50
  -6  -8  -1    2.40    0.70
  -6  -8  -1    2.40    0.70
   6   8   1    2.90    0.70
   6   8   1    2.00    0.70
   6   8   1    1.20    0.60
  -6   8  -1    3.10    0.70
   6   8   1    2.80    0.70
   6   8   1    2.90    0.70
  -6   8  -1    1.80    0.60
  -8  -8  -1   18.60    1.30
   8  -8   1   16.20    1.00
   8  -8   1   19.50    1.30
   8  -8   1   16.50    1.40
  -8  -8  -1   16.20    1.30
   8  -8   1   16.70    1.30
  -8  -8  -1   17.00    1.00
  -8  -8  -1   17.40    1.40
   8  -8   1   16.10    1.20
   8  -8   1   18.10    1.30
   8  -8   1   15.20    1.20
   8   8   1   17.60    1.50
   8   8   1   16.40    1.20
   8   8   1   16.30    1.30
   8   8   1   17.70    1.30
   8   8   1   18.90    1.40
  -8   8  -1   16.00    1.20
 -10  -8  -1   22.70    1.50
  10  -8   1   20.80    1.50
  10  -8   1   21.50    1.20
  10  -8   1   17.30    1.30
  10  -8   1   20.30    1.50
  10  -8   1   21.00    1.40
 -10  -8  -1   19.80    1.50
  10  -8   1   21.50    1.40
 -10  -8  -1   17.70    1.40
 -10  -8  -1   20.80    1.10
  10  -8   1   20.00    1.50
 -10   8  -1   21.10    1.30
  10   8   1   21.30    1.50
  10   8   1   20.60    1.50
  10   8   1   23.90    1.50
  10   8   1   25.80    1.80
  10   8   1   20.90    1.40
  12  -8   1    1.00    0.60
  12  -8   1    0.30    0.60
  12  -8   1    0.20    0.60
  12  -8   1    0.30    0.70
  12  -8   1    0.80    0.70
 -12  -8  -1    0.10    0.60
  12  -8   1    0.80    0.70
  12  -8   1    0.50    0.50
 -12  -8  -1    1.00    0.90
 -12  -8  -1    2.00    0.70
  12   8   1    0.50    0.70
  12   8   1    1.30    0.70
 -12   8  -1    1.00    0.50
  12   8   1    0.90    0.70
  12   8   1   -0.80    0.70
  12   8   1    0.90    0.60
  14  -8   1   -0.60    0.60
 -14  -8  -1   -1.10    0.60
 -14  -8  -1   -0.90    0.70
  14  -8   1    1.00    0.80
  14  -8   1    0.40    0.60
  14  -8   1    0.70    0.60
  14  -8   1   -0.70    0.60
  14  -8   1   -0.20    0.50
  14  -8   1    0.50    0.90
 -14  -8  -1    0.20    0.80
  14   8   1   -0.10    0.70
  14   8   1   -0.40    0.70
  14   8   1   -1.20    0.60
  14   8   1    0.00    0.50
  14   8   1    0.50    0.70
  14   8   1   -0.10    0.70
  16  -8   1   21.50    1.70
 -16  -8  -1   16.90    1.60
  16  -8   1   18.00    1.40
  16  -8   1   18.50    1.40
  16  -8   1   18.70    1.60
  16  -8   1   20.70    1.30
  16  -8   1   18.50    1.70
 -16  -8  -1   18.10    1.60
  16  -8   1   18.60    1.20
 -16  -8  -1   18.30    1.70
  16   8   1   19.10    1.60
  16   8   1   20.00    1.60
  16   8   1   17.50    1.60
  16   8   1   17.80    1.50
  16   8   1   19.00    1.20
  16   8   1   17.50    1.50
  18  -8   1    3.80    0.80
 -18  -8  -1    4.00    1.00
  18  -8   1    3.50    1.00
  18  -8   1    3.30    0.70
  18  -8   1    1.90    0.80
 -18  -8  -1    3.30    1.00
 -18  -8  -1    1.40    0.90
  18  -8   1    6.60    1.20
  18  -8   1    2.40    0.70
  18  -8   1    4.00    0.80
  18   8   1    4.20    0.60
  18   8   1    4.40    1.00
  18   8   1    2.80    1.00
  18   8   1    2.80    0.90
  18   8   1    2.20    1.00
  18   8   1    4.20    1.00
 -20  -8  -1    4.50    1.10
 -20  -8  -1    4.00    1.00
  20  -8   1    5.60    1.10
 -20  -8  -1    4.20    1.20
  20  -8   1    5.20    0.80
  20  -8   1    5.50    1.10
  20  -8   1    2.30    0.80
  20  -8   1    4.80    1.10
  20  -8   1    5.30    0.70
  20   8   1    4.70    1.30
  20   8   1    5.10    1.00
  20   8   1    4.30    1.10
  20   8   1    4.20    1.00
 -20   8  -1    6.20    1.10
  20   8   1    4.90    1.10
  20   8   1    4.80    0.60
  22  -8   1   -0.10    0.90
 -22  -8  -1    0.60    0.90
  22  -8   1    0.20    0.50
 -22  -8  -1    1.30    1.10
  22  -8   1    1.50    0.90
  22  -8   1    0.00    0.60
 -22  -8  -1   -0.60    0.80
  22  -8   1    0.30    0.80
  22  -8   1    0.40    0.70
  22   8   1    0.50    0.90
  22   8   1    0.10    0.80
  22   8   1    0.30    0.90
 -22   8  -1   -0.20    1.00
  22   8   1    0.60    0.90
  24  -8   1    5.60    1.00
 -24  -8  -1    6.50    1.30
  24  -8   1    7.10    1.00
  24  -8   1    8.40    1.40
  24  -8   1    6.10    0.60
  24  -8   1    9.30    1.40
  24  -8   1    6.80    1.40
 -24  -8  -1    5.70    1.20
 -24  -8  -1    9.90    1.50
  24   8   1    6.80    1.10
  24   8   1    7.70    1.40
 -24   8  -1    6.80    1.30
  24   8   1    6.20    1.20
  24   8   1    7.30    1.30
 -26  -8  -1    7.00    1.40
  26  -8   1    5.80    1.00
  26  -8   1    6.00    1.40
 -26  -8  -1    8.00    1.60
  26  -8   1    6.10    1.00
  26  -8   1    9.30    1.30
 -26  -8  -1    7.70    1.50
  26  -8   1    5.50    1.50
 -26   8  -1    6.40    1.40
  26   8   1    3.60    1.40
  26   8   1    7.30    1.30
  26   8   1    8.40    1.20
 -26   8  -1    6.60    1.30
  26   8   1    4.50    1.10
  26   8   1    7.60    1.30
 -28  -8  -1    3.10    1.20
 -28  -8  -1    0.30    1.10
  28  -8   1    1.40    1.40
 -28  -8  -1    1.30    1.30
  28  -8   1   -0.60    0.80
  28  -8   1   -0.20    0.70
  28  -8   1    1.80    1.30
  28  -8   1    0.20    1.10
 -28   8  -1   -0.60    1.00
  28   8   1   -0.70    0.80
  28   8   1    1.90    1.10
 -28   8  -1    1.50    1.20
  28   8   1    0.70    1.00
  28   8   1    1.60    1.10
  28   8   1    2.00    1.20
  27  -9  -1    5.50    0.60
 -27  -9   1    4.60    1.40
 -27  -9   1    3.70    1.30
 -27  -9   1    4.90    1.60
  27  -9  -1    5.10    1.00
  27  -9  -1    5.80    1.30
  27  -9  -1    4.60    1.50
  27  -9  -1    6.10    1.60
  27  -9  -1    4.90    1.00
  27   9  -1    5.90    1.60
  27   9  -1    5.70    1.20
 -27   9   1    5.90    1.40
  27   9  -1    3.40    1.20
  27   9  -1    4.00    1.30
  27   9  -1    6.70    1.30
 -27   9   1    4.30    1.40
  27   9  -1    5.90    1.30
  25  -9  -1    0.10    0.70
 -25  -9   1   -1.90    1.00
 -25  -9   1    0.90    1.10
 -25  -9   1   -0.50    0.90
  25  -9  -1    0.50    0.80
  25  -9  -1   -0.70    1.00
  25  -9  -1    1.10    1.00
  25  -9  -1    0.80    1.30
  25  -9  -1   -0.20    0.50
 -25   9   1    2.60    1.30
 -25   9   1    2.20    1.00
  25   9  -1   -0.90    0.90
  25   9  -1   -0.80    1.00
  25   9  -1   -0.60    0.90
  25   9  -1    1.00    0.90
  25   9  -1    2.20    1.00
  23  -9  -1    0.10    0.80
  23  -9  -1    1.60    0.60
  23  -9  -1   -0.30    1.00
 -23  -9   1   -1.10    0.70
 -23  -9   1    1.40    1.20
  23  -9  -1    1.30    1.10
 -23  -9   1    1.10    1.00
  23  -9  -1   -0.60    0.70
  23  -9  -1    0.80    0.70
  23   9  -1    2.70    1.00
  23   9  -1    0.80    0.90
  23   9  -1   -0.50    0.90
  23   9  -1   -0.10    0.90
  23   9  -1    0.70    0.40
  23   9  -1   -2.40    1.00
 -23   9   1   -0.10    0.80
  21  -9  -1    2.10    0.70
  21  -9  -1    1.90    1.00
 -21  -9   1    3.20    1.10
  21  -9  -1    3.00    1.10
  21  -9  -1    2.50    1.20
  21  -9  -1    1.70    0.70
 -21  -9   1    2.10    0.90
  21  -9  -1    2.10    0.80
 -21  -9   1    3.70    1.20
 -21   9   1    2.40    1.00
  21   9  -1    2.20    0.60
  21   9  -1    2.50    1.10
  21   9  -1    2.60    1.10
  21   9  -1    2.10    1.00
  21   9  -1    1.80    1.00
  21   9  -1    2.20    1.00
  19  -9  -1    9.80    1.10
 -19  -9   1    8.10    1.30
 -19  -9   1   10.00    1.40
  19  -9  -1    7.90    1.20
  19  -9  -1    8.80    1.00
  19  -9  -1   10.00    1.20
  19  -9  -1   10.00    1.40
 -19  -9   1    9.00    1.30
  19  -9  -1    9.80    1.50
  19   9  -1   10.60    1.30
  19   9  -1    9.30    0.90
 -19   9   1   10.70    1.50
  19   9  -1    9.00    1.50
  19   9  -1    8.10    1.30
  19   9  -1    9.60    1.30
  19   9  -1    9.00    1.30
  17  -9  -1   40.30    2.50
 -17  -9   1   41.70    2.40
 -17  -9   1   38.60    2.30
  17  -9  -1   35.40    1.90
 -17  -9   1   34.80    2.30
  17  -9  -1   39.50    2.20
  17  -9  -1   40.50    2.20
  17  -9  -1   40.10    2.40
  17  -9  -1   38.70    2.20
  17  -9  -1   40.20    2.00
  17   9  -1   37.00    1.90
  17   9  -1   37.00    2.30
  17   9  -1   37.30    2.30
  17   9  -1   37.20    2.30
  17   9  -1   37.20    2.40
  17   9  -1   42.70    2.30
  15  -9  -1   52.79    2.50
  15  -9  -1   61.79    2.70
 -15  -9   1   52.69    2.90
  15  -9  -1   54.29    2.50
  15  -9  -1   56.69    2.90
  15  -9  -1   52.99    2.70
 -15  -9   1   56.09    2.80
  15  -9  -1   55.19    2.70
 -15  -9   1   54.99    2.70
  15  -9  -1   58.09    2.90
  15   9  -1   55.59    2.80
  15   9  -1   54.09    2.80
  15   9  -1   52.19    2.80
  15   9  -1   54.29    2.80
  15   9  -1   52.29    2.90
  15   9  -1   51.99    2.50
  13  -9  -1    2.10    0.80
  13  -9  -1    1.80    0.70
 -13  -9   1    2.60    1.00
  13  -9  -1    1.80    0.80
  13  -9  -1    2.70    0.90
  13  -9  -1    2.20    0.80
 -13  -9   1    2.60    0.80
  13  -9  -1    2.20    0.70
 -13  -9   1    1.10    0.80
  13  -9  -1    2.10    0.90
  13   9  -1    2.90    0.80
  13   9  -1    2.60    1.10
  13   9  -1    3.50    0.90
  13   9  -1    0.90    0.90
  13   9  -1    3.00    0.90
  11  -9  -1   65.89    3.10
  11  -9  -1   65.29    3.10
 -11  -9   1   70.59    3.10
  11  -9  -1   71.79    2.90
  11  -9  -1   62.79    3.10
  11  -9  -1   68.49    3.00
  11  -9  -1   71.89    3.10
 -11  -9   1   68.39    3.20
 -11  -9   1   66.19    3.10
  11  -9  -1   65.79    3.20
  11   9  -1   67.89    3.10
  11   9  -1   65.09    3.10
 -11   9   1   66.69    2.90
  11   9  -1   65.89    3.30
  11   9  -1   65.69    3.20
  11   9  -1   69.79    3.00
  -9  -9   1   95.79    4.20
   9  -9  -1   88.89    4.00
   9  -9  -1  100.79    4.10
   9  -9  -1   90.39    4.00
   9  -9  -1   96.69    4.10
   9  -9  -1   99.79    4.00
  -9  -9   1   95.59    3.90
   9  -9  -1   99.59    3.80
  -9  -9   1   96.29    3.80
   9  -9  -1   94.09    4.20
  -9  -9   1   93.89    4.10
   9   9  -1   98.09    3.90
   9   9  -1   97.79    4.10
   9   9  -1   97.89    4.20
   9   9  -1   99.19    4.10
  -9   9   1   94.09    3.90
   9   9  -1   96.09    4.10
  -7  -9   1   21.00    1.50
   7  -9  -1   23.20    1.60
   7  -9  -1   24.90    1.60
   7  -9  -1   22.00    1.60
  -7  -9   1   19.90    1.50
   7  -9  -1   21.70    1.50
   7  -9  -1   20.10    1.50
  -7  -9   1   19.50    1.50
   7  -9  -1   20.70    1.20
   7  -9  -1   17.80    1.40
  -7  -9   1   19.90    1.40
  -7  -9   1   23.20    1.30
   7   9  -1   20.00    1.60
   7   9  -1   22.10    1.60
   7   9  -1   20.00    1.40
   7   9  -1   21.60    1.60
   7   9  -1   19.90    1.50
  -7   9   1   20.10    1.30
  -5  -9   1   44.90    2.30
   5  -9  -1   42.20    2.30
   5  -9  -1   40.10    2.10
   5  -9  -1   38.70    2.10
  -5  -9   1   43.10    2.00
  -5  -9   1   36.80    2.20
  -5  -9   1   45.70    2.00
   5  -9  -1   41.40    2.20
  -5  -9   1   42.70    2.20
   5  -9  -1   41.00    2.20
  -5  -9   1   43.60    2.30
   5  -9  -1   39.20    2.10
  -5  -9   1   38.50    2.20
   5  -9  -1   42.50    1.90
  -5   9   1   43.20    2.10
   5   9  -1   41.20    2.20
   5   9  -1   47.10    2.30
   5   9  -1   41.80    2.30
   5   9  -1   40.70    2.20
  -5   9   1   40.20    2.10
   5   9  -1   43.00    2.10
  -3  -9   1   86.39    3.70
   3  -9  -1   83.99    3.60
   3  -9  -1   82.49    3.40
  -3  -9   1   86.29    3.60
  -3  -9   1   89.99    3.70
   3  -9  -1   82.59    3.60
   3  -9  -1   84.19    3.70
   3  -9  -1   84.79    3.60
   3  -9  -1   83.89    3.60
  -3  -9   1   84.69    3.60
  -3  -9   1   88.79    3.50
  -3  -9   1   84.19    3.40
  -3   9   1   86.09    3.50
   3   9  -1   82.69    3.60
   3   9  -1   82.89    3.60
  -3   9   1   84.59    3.60
   3   9  -1   84.39    3.50
   3   9  -1   82.99    3.60
   3   9  -1   87.19    3.80
   1  -9  -1    0.90    0.60
  -1  -9   1    1.60    0.70
   1  -9  -1   -0.20    0.40
  -1  -9   1    1.30    0.70
   1  -9  -1    1.50    0.60
  -1  -9   1    0.90    0.60
  -1  -9   1    0.80    0.50
  -1  -9   1    1.20    0.80
   1  -9  -1    0.60    0.60
  -1  -9   1    0.70    0.70
   1  -9  -1    0.80    0.60
   1  -9  -1    1.00    0.70
  -1  -9   1    1.50    0.70
   1  -9  -1    0.60    0.80
  -1   9   1    0.80    0.70
  -1   9   1    1.00    0.70
   1   9  -1    0.40    0.60
  -1   9   1    1.90    0.80
   1   9  -1    0.10    0.60
   1   9  -1    1.40    0.80
   1   9  -1    1.30    0.70
   1   9  -1    0.40    0.60
  -1  -9  -1   11.70    1.10
   1  -9   1   12.50    0.90
   1  -9   1   11.80    1.20
   1  -9   1   12.70    1.20
  -1  -9  -1   13.20    1.20
   1  -9   1   12.30    1.10
   1  -9   1   11.40    1.10
  -1  -9  -1   12.50    1.20
  -1  -9  -1    8.90    1.10
  -1  -9  -1   13.10    1.00
   1  -9   1   11.20    1.10
   1  -9   1   11.20    1.20
  -1  -9  -1   11.00    1.00
   1   9   1   10.90    1.10
   1   9   1   11.50    1.20
  -1   9  -1   11.90    1.10
   1   9   1   13.00    1.20
  -1   9  -1   11.80    1.20
   1   9   1   12.30    1.20
  -1   9  -1   12.40    1.20
   1   9   1   10.90    1.20
  -3  -9  -1   36.90    1.80
   3  -9   1   33.80    1.90
   3  -9   1   37.60    2.00
  -3  -9  -1   34.50    2.00
  -3  -9  -1   35.30    2.00
   3  -9   1   35.90    2.00
  -3  -9  -1   37.30    2.00
   3  -9   1   37.60    2.00
  -3  -9  -1   36.10    1.80
   3  -9   1   36.60    2.00
  -3  -9  -1   38.00    2.00
   3  -9   1   34.70    2.00
   3  -9   1   36.50    1.70
   3   9   1   38.10    1.90
  -3   9  -1   35.40    1.90
   3   9   1   35.40    2.00
   3   9   1   34.30    1.90
   3   9   1   35.70    2.00
  -3   9  -1   33.00    1.90
   3   9   1   40.50    2.00
  -5  -9  -1   52.89    2.60
   5  -9   1   55.89    2.70
   5  -9   1   53.29    2.60
  -5  -9  -1   58.59    2.70
  -5  -9  -1   58.29    2.60
   5  -9   1   52.09    2.60
  -5  -9  -1   50.49    2.50
   5  -9   1   53.99    2.60
   5  -9   1   62.29    2.70
  -5  -9  -1   55.69    2.40
  -5  -9  -1   54.19    2.70
  -5  -9  -1   53.99    2.60
   5  -9   1   51.69    2.30
   5  -9   1   54.99    2.60
  -5   9  -1   55.79    2.60
   5   9   1   54.29    2.60
   5   9   1   54.99    2.70
   5   9   1   54.59    2.70
   5   9   1   55.49    2.50
   5   9   1   55.59    2.70
  -7  -9  -1  185.78    7.20
  -7  -9  -1  182.88    6.70
  -7  -9  -1  183.88    6.80
   7  -9   1  186.78    6.60
   7  -9   1  181.28    7.20
   7  -9   1  192.38    7.00
  -7  -9  -1  182.88    7.00
   7  -9   1  176.08    6.90
   7  -9   1  170.48    7.00
   7  -9   1  178.78    7.00
  -7  -9  -1  194.88    7.10
   7  -9   1  177.88    6.90
   7   9   1  189.28    7.00
   7   9   1  185.08    7.00
  -7   9  -1  185.18    7.00
   7   9   1  181.18    7.00
   7   9   1  179.58    7.20
   7   9   1  174.38    6.70
  -9  -9  -1    2.20    0.80
   9  -9   1    0.50    0.70
   9  -9   1    2.10    0.70
   9  -9   1    2.90    0.80
   9  -9   1    2.00    0.50
  -9  -9  -1    0.70    0.60
   9  -9   1    1.30    0.80
   9  -9   1    1.80    0.80
  -9  -9  -1    1.40    0.80
   9  -9   1    3.00    0.90
   9   9   1    1.90    0.70
   9   9   1    0.60    0.80
   9   9   1    1.00    0.80
  -9   9  -1    1.80    0.70
   9   9   1    1.10    0.80
   9   9   1    1.90    0.90
  11  -9   1   30.50    2.00
 -11  -9  -1   28.10    2.00
  11  -9   1   32.70    1.60
  11  -9   1   30.00    1.80
  11  -9   1   29.20    1.90
  11  -9   1   30.60    1.90
 -11  -9  -1   30.30    1.90
  11  -9   1   30.90    2.00
 -11  -9  -1   28.90    1.80
  11  -9   1   30.20    1.80
  11   9   1   32.90    2.00
  11   9   1   31.20    1.80
  11   9   1   29.10    2.10
 -11   9  -1   29.20    1.70
  11   9   1   29.20    1.90
  11   9   1   32.00    2.00
  13  -9   1    1.40    0.80
  13  -9   1    0.20    0.70
 -13  -9  -1    1.30    0.70
 -13  -9  -1   -0.10    0.90
  13  -9   1    0.10    0.70
  13  -9   1    1.40    0.80
  13  -9   1    0.90    0.90
  13  -9   1   -0.10    0.50
 -13  -9  -1    1.20    0.70
  13  -9   1    0.30    0.80
  13   9   1    0.10    0.80
  13   9   1   -0.20    0.80
  13   9   1    1.30    0.80
  13   9   1    0.90    0.70
  13   9   1    0.90    0.90
  15  -9   1    0.90    0.80
  15  -9   1    2.40    1.00
  15  -9   1    0.80    0.60
  15  -9   1    1.40    1.10
 -15  -9  -1    0.80    0.80
  15  -9   1    0.60    0.80
  15  -9   1    1.60    0.80
 -15  -9  -1    0.50    0.80
 -15  -9  -1    1.10    0.80
  15   9   1    2.10    0.90
  15   9   1    0.00    0.80
  15   9   1    1.60    0.90
  15   9   1    1.20    0.60
  15   9   1    2.60    0.90
  17  -9   1    0.00    0.70
  17  -9   1   -0.10    0.90
 -17  -9  -1    1.30    1.00
 -17  -9  -1    2.50    1.10
  17  -9   1   -0.10    0.60
 -17  -9  -1    1.00    0.80
  17  -9   1    0.30    1.00
  17  -9   1   -0.60    0.70
  17  -9   1   -0.10    0.80
  17   9   1    1.30    0.90
  17   9   1    1.40    0.60
  17   9   1    0.60    0.90
  17   9   1    0.70    1.10
  17   9   1    1.50    0.90
  17   9   1   -0.20    0.90
 -19  -9  -1    1.90    1.10
 -19  -9  -1    0.80    1.00
  19  -9   1    0.30    1.00
  19  -9   1    1.60    0.80
  19  -9   1    1.30    0.60
  19  -9   1    0.00    0.70
  19  -9   1    1.60    1.10
 -19  -9  -1    1.30    0.90
  19  -9   1    0.90    0.70
  19   9   1    0.70    0.90
  19   9   1    0.00    0.90
  19   9   1    0.80    0.60
  19   9   1    0.40    0.80
  19   9   1    0.80    0.90
  19   9   1    2.30    1.00
 -21  -9  -1   28.30    2.20
  21  -9   1   33.30    1.90
  21  -9   1   27.60    1.60
  21  -9   1   29.50    2.00
  21  -9   1   27.50    2.10
 -21  -9  -1   30.30    2.30
  21  -9   1   28.50    2.30
 -21  -9  -1   35.60    2.40
  21  -9   1   29.50    1.80
  21   9   1   26.40    2.20
  21   9   1   30.20    1.40
  21   9   1   25.20    2.00
  21   9   1   34.30    2.10
  21   9   1   31.60    2.20
 -21   9  -1   30.70    2.10
  21   9   1   30.90    2.10
  23  -9   1    7.90    1.30
  23  -9   1    6.90    1.00
 -23  -9  -1    6.30    1.30
  23  -9   1    7.90    1.50
 -23  -9  -1    8.20    1.40
  23  -9   1    5.80    1.30
  23  -9   1    6.10    0.70
  23  -9   1    6.70    1.00
 -23  -9  -1    4.60    1.40
  23   9   1    5.50    1.20
 -23   9  -1    6.40    1.30
  23   9   1    4.40    1.30
  23   9   1    5.70    1.10
  23   9   1    6.20    1.20
  23   9   1    7.30    1.30
  25  -9   1    8.10    1.30
  25  -9   1    7.50    1.50
  25  -9   1    7.40    1.10
  25  -9   1    5.90    1.00
 -25  -9  -1    8.70    1.50
  25  -9   1    5.10    0.60
 -25  -9  -1    8.80    1.70
 -25  -9  -1    5.10    1.30
  25  -9   1    7.40    1.40
  25   9   1   10.10    1.60
 -25   9  -1    8.00    1.50
  25   9   1    6.30    1.30
  25   9   1    7.60    1.30
  25   9   1    6.90    1.30
  25   9   1    6.60    1.30
  24 -10  -1    1.40    0.90
  24 -10  -1    2.20    0.70
 -24 -10   1    2.20    1.10
  24 -10  -1    0.90    1.10
 -24 -10   1    1.60    1.20
  24 -10  -1    3.00    1.30
 -24 -10   1    1.50    1.40
  24 -10  -1    3.80    1.10
  24 -10  -1    1.90    0.90
  24  10  -1    1.80    0.40
  24  10  -1    1.10    1.00
  24  10  -1    2.00    1.20
  24  10  -1    0.90    1.40
  24  10  -1    3.00    1.20
 -24  10   1    1.40    1.10
  24  10  -1    5.20    1.30
 -22 -10   1    1.30    1.00
  22 -10  -1    0.10    0.80
  22 -10  -1   -0.10    0.80
  22 -10  -1    2.90    0.90
  22 -10  -1    2.00    0.70
 -22 -10   1   -0.60    1.00
 -22 -10   1    0.60    1.00
  22 -10  -1    1.70    1.20
  22 -10  -1    3.00    1.40
  22  10  -1    1.30    0.60
  22  10  -1    0.60    1.00
  22  10  -1    0.80    1.00
  22  10  -1    1.50    1.10
  22  10  -1    1.00    1.00
 -22  10   1    0.30    1.20
  22  10  -1    0.80    1.10
  20 -10  -1   -0.60    0.80
  20 -10  -1    1.00    0.90
  20 -10  -1    1.10    0.70
  20 -10  -1    1.20    0.90
  20 -10  -1    1.20    1.10
 -20 -10   1    1.20    1.10
 -20 -10   1    0.30    1.10
  20 -10  -1    0.40    1.00
 -20 -10   1    0.20    0.80
  20  10  -1    0.60    0.70
  20  10  -1    0.90    1.00
  20  10  -1    0.70    1.00
  20  10  -1   -0.40    0.90
  20  10  -1    1.00    1.00
 -20  10   1    1.90    1.00
  20  10  -1    2.00    1.00
 -18 -10   1   23.60    1.80
 -18 -10   1   23.10    2.00
  18 -10  -1   19.50    1.50
  18 -10  -1   23.80    2.00
  18 -10  -1   22.20    1.80
 -18 -10   1   23.50    1.80
  18 -10  -1   21.50    1.70
  18 -10  -1   19.70    1.90
  18 -10  -1   24.10    1.80
  18  10  -1   20.80    1.90
  18  10  -1   21.10    2.00
  18  10  -1   23.30    1.50
  18  10  -1   21.20    1.90
  18  10  -1   22.30    1.90
 -18  10   1   22.40    2.00
 -16 -10   1   -1.10    0.90
 -16 -10   1    0.80    0.90
  16 -10  -1    0.80    1.00
  16 -10  -1    0.10    0.80
  16 -10  -1   -1.80    1.00
 -16 -10   1    1.40    0.90
  16 -10  -1    0.60    0.70
  16 -10  -1    0.70    0.80
  16 -10  -1    0.50    0.80
  16  10  -1   -0.60    0.90
  16  10  -1    0.90    0.70
  16  10  -1   -1.90    0.80
  16  10  -1    0.10    0.90
  16  10  -1    0.50    1.00
 -14 -10   1    0.20    0.90
  14 -10  -1   -0.80    0.80
  14 -10  -1    0.50    0.80
 -14 -10   1   -0.40    0.80
  14 -10  -1   -0.80    0.80
  14 -10  -1   -1.50    0.80
  14 -10  -1   -0.10    0.70
  14 -10  -1    0.40    1.00
 -14 -10   1   -0.60    0.80
  14  10  -1   -0.90    0.80
  14  10  -1    0.30    0.80
  14  10  -1   -0.80    0.90
  14  10  -1    1.30    0.90
  14  10  -1   -0.40    0.90
  12 -10  -1   12.90    1.30
 -12 -10   1   13.20    1.50
 -12 -10   1   10.20    1.30
 -12 -10   1   13.70    1.40
  12 -10  -1   12.50    1.30
  12 -10  -1   12.60    1.30
  12 -10  -1   12.70    1.50
  12 -10  -1   12.00    1.50
  12 -10  -1   13.20    1.40
  12  10  -1   14.60    1.30
  12  10  -1   13.60    1.40
  12  10  -1   12.80    1.50
  12  10  -1   12.80    1.40
  12  10  -1   12.30    1.50
  10 -10  -1   21.20    1.70
 -10 -10   1   20.90    1.70
  10 -10  -1   24.10    1.70
 -10 -10   1   24.10    1.90
 -10 -10   1   21.50    1.60
  10 -10  -1   23.70    1.70
  10 -10  -1   24.10    1.80
  10 -10  -1   23.50    1.40
  10 -10  -1   23.20    1.70
  10 -10  -1   23.50    1.70
  10  10  -1   22.30    1.60
  10  10  -1   24.40    1.80
  10  10  -1   24.00    1.90
  10  10  -1   22.60    1.80
  10  10  -1   21.30    1.80
   8 -10  -1    9.70    1.30
   8 -10  -1    9.90    1.30
   8 -10  -1    8.60    1.20
   8 -10  -1   11.20    1.00
   8 -10  -1    9.80    1.20
  -8 -10   1    9.20    1.20
   8 -10  -1    9.30    1.20
  -8 -10   1    8.60    1.30
   8 -10  -1    8.80    1.20
  -8 -10   1    8.60    1.10
   8  10  -1    9.90    1.20
  -8  10   1    9.90    1.10
   8  10  -1   10.50    1.30
   8  10  -1   10.60    1.20
   8  10  -1   10.80    1.20
   8  10  -1    8.60    1.30
  -6 -10   1   43.10    2.10
  -6 -10   1   43.00    2.10
   6 -10  -1   41.10    2.30
   6 -10  -1   42.80    2.20
   6 -10  -1   44.90    2.40
  -6 -10   1   43.60    2.50
   6 -10  -1   40.10    2.30
  -6 -10   1   41.30    2.30
   6 -10  -1   40.20    2.30
   6 -10  -1   41.90    2.40
  -6 -10   1   44.50    2.40
   6 -10  -1   42.80    2.00
   6  10  -1   44.30    2.30
   6  10  -1   42.20    2.40
   6  10  -1   38.30    2.30
   6  10  -1   39.90    2.20
  -6  10   1   43.40    2.20
   6  10  -1   43.50    2.40
  -4 -10   1   -0.30    0.70
   4 -10  -1    1.00    0.80
  -4 -10   1    0.60    0.90
  -4 -10   1    0.20    0.60
  -4 -10   1    2.10    0.70
   4 -10  -1    0.70    0.80
   4 -10  -1    0.70    0.50
   4 -10  -1    0.10    0.70
  -4 -10   1    1.30    0.80
   4 -10  -1    0.80    0.80
  -4 -10   1    0.90    0.70
  -4 -10   1    0.30    0.80
   4 -10  -1    0.70    0.80
   4 -10  -1    1.80    0.80
   4  10  -1    1.50    0.90
  -4  10   1    0.90    0.80
  -4  10   1   -0.90    0.70
   4  10  -1    0.70    0.80
   4  10  -1    0.00    0.70
  -2 -10   1    0.70    0.60
   2 -10  -1    1.10    0.80
   2 -10  -1    1.30    0.80
  -2 -10   1   -0.40    0.70
   2 -10  -1    0.40    0.70
   2 -10  -1    0.30    0.70
  -2 -10   1   -0.70    0.70
   2 -10  -1   -0.40    0.60
  -2 -10   1   -0.60    0.60
  -2 -10   1    0.50    0.80
  -2 -10   1   -1.00    0.80
  -2 -10   1    1.30    0.80
   2 -10  -1    1.70    0.80
   2 -10  -1    0.40    0.70
   2  10  -1    0.40    0.70
  -2  10   1    0.20    0.60
   2  10  -1    0.40    0.70
  -2  10   1    0.50    0.70
   2  10  -1   -0.20    0.80
   0 -10   1  107.09    4.40
   0 -10  -1  101.59    4.50
   0 -10  -1  109.89    4.60
   0 -10  -1  115.89    4.30
   0 -10  -1  109.79    4.40
   0 -10  -1  104.49    4.50
   0 -10   1  109.79    4.20
   0 -10   1  109.39    4.60
   0 -10   1  107.89    4.50
   0 -10   1  100.79    4.50
   0 -10   1  105.99    4.60
   0 -10   1  103.19    4.40
   0 -10  -1  109.09    4.50
   0 -10  -1  109.09    4.70
   0  10   1  108.09    4.40
   0  10  -1  108.89    4.60
   0  10  -1  110.69    4.40
   0  10   1  108.29    4.50
  -2 -10  -1    4.10    0.80
  -2 -10  -1    3.80    0.90
   2 -10   1    4.40    0.70
   2 -10   1    3.90    0.90
   2 -10   1    3.10    0.90
  -2 -10  -1    4.30    1.00
  -2 -10  -1    2.90    1.00
  -2 -10  -1    2.70    0.90
   2 -10   1    3.60    0.90
  -2 -10  -1    4.50    1.00
   2 -10   1    4.20    0.90
   2 -10   1    5.30    1.00
  -2 -10  -1    5.40    0.90
   2 -10   1    2.40    0.90
  -2  10  -1    2.60    0.80
   2  10   1    3.50    0.80
  -2  10  -1    4.00    0.90
   2  10   1    3.10    1.00
   2  10   1    3.40    0.90
  -4 -10  -1   22.10    1.70
   4 -10   1   26.00    1.80
   4 -10   1   22.00    1.70
   4 -10   1   24.20    1.80
   4 -10   1   24.30    1.80
   4 -10   1   23.00    1.30
   4 -10   1   23.30    1.70
  -4 -10  -1   22.20    1.80
  -4 -10  -1   23.20    1.40
  -4 -10  -1   25.20    1.50
   4 -10   1   23.30    1.70
  -4 -10  -1   25.00    1.80
  -4 -10  -1   23.50    1.70
   4  10   1   22.00    1.70
   4  10   1   23.70    1.70
  -4  10  -1   25.50    1.70
   4  10   1   21.50    1.60
   4  10   1   22.10    1.70
   4  10   1   25.10    1.80
   6 -10   1    1.60    0.50
   6 -10   1    0.60    0.80
   6 -10   1    1.00    0.80
  -6 -10  -1    1.90    0.80
   6 -10   1    1.60    0.90
  -6 -10  -1    0.10    0.90
   6 -10   1    1.30    0.80
   6 -10   1    0.50    0.70
  -6 -10  -1    0.40    0.70
  -6 -10  -1    2.30    1.00
  -6 -10  -1    1.80    0.70
   6 -10   1    1.00    0.80
   6  10   1    0.60    0.80
  -6  10  -1    1.00    0.70
   6  10   1    0.80    0.90
   6  10   1    1.70    0.90
   6  10   1    1.70    0.80
   6  10   1    0.70    0.80
  -8 -10  -1    8.90    1.30
   8 -10   1    8.40    1.10
   8 -10   1   10.20    1.20
  -8 -10  -1    9.90    1.10
   8 -10   1    9.00    1.20
   8 -10   1    8.90    1.20
   8 -10   1    8.60    1.30
  -8 -10  -1    9.30    1.30
   8 -10   1    9.70    1.20
   8  10   1    8.70    1.30
  -8  10  -1    9.40    1.10
   8  10   1    9.70    1.20
   8  10   1   11.30    1.20
   8  10   1    8.10    1.30
   8  10   1   10.60    1.30
 -10 -10  -1   46.90    2.40
 -10 -10  -1   44.80    2.50
  10 -10   1   47.00    2.50
  10 -10   1   48.20    2.60
  10 -10   1   44.30    2.50
  10 -10   1   45.80    2.60
  10 -10   1   49.99    2.40
 -10 -10  -1   47.30    2.60
  10 -10   1   48.00    2.50
  10  10   1   43.90    2.40
  10  10   1   43.60    2.50
  10  10   1   48.70    2.60
  10  10   1   43.80    2.60
 -10  10  -1   45.90    2.40
  10  10   1   47.20    2.70
 -12 -10  -1   18.20    1.70
  12 -10   1   20.10    1.80
  12 -10   1   20.60    1.70
  12 -10   1   20.10    1.70
  12 -10   1   20.30    1.70
  12 -10   1   19.90    1.50
  12 -10   1   18.90    1.60
 -12 -10  -1   17.70    1.80
 -12 -10  -1   19.10    1.50
  12  10   1   18.20    1.70
  12  10   1   20.10    1.90
  12  10   1   20.40    1.50
  12  10   1   21.60    1.80
  12  10   1   19.60    1.70
  14 -10   1    8.80    1.30
  14 -10   1    8.10    1.20
  14 -10   1    8.10    1.20
  14 -10   1    6.60    1.00
 -14 -10  -1    8.60    1.30
 -14 -10  -1    7.90    1.30
  14 -10   1    9.70    1.20
  14 -10   1    9.20    1.30
 -14 -10  -1    7.90    1.30
  14  10   1    7.20    1.20
  14  10   1    9.70    1.40
  14  10   1    7.90    1.30
  14  10   1    8.00    1.20
  14  10   1    4.90    0.90
 -16 -10  -1    1.70    0.90
  16 -10   1    3.20    1.00
 -16 -10  -1    2.70    0.90
  16 -10   1    3.70    0.90
  16 -10   1    3.20    0.90
  16 -10   1    2.30    0.70
  16 -10   1    1.70    1.00
 -16 -10  -1    3.70    1.10
  16 -10   1    2.60    1.20
  16  10   1    2.00    1.00
  16  10   1    4.50    1.10
  16  10   1    2.90    1.10
  16  10   1    1.90    1.00
  16  10   1    2.20    0.70
 -18 -10  -1   15.00    1.70
  18 -10   1   13.20    1.20
 -18 -10  -1   14.10    1.60
  18 -10   1   13.40    1.50
 -18 -10  -1   14.40    1.70
  18 -10   1   14.70    1.40
  18 -10   1   12.50    1.60
  18 -10   1   14.00    1.40
  18 -10   1   14.40    1.60
  18  10   1   13.70    1.60
  18  10   1   14.70    1.60
  18  10   1   13.80    1.20
  18  10   1   13.20    1.50
  18  10   1   13.00    1.60
 -20 -10  -1    4.40    1.10
  20 -10   1    7.50    1.10
 -20 -10  -1    6.80    1.50
  20 -10   1   10.30    1.00
  20 -10   1    7.00    1.20
  20 -10   1    7.20    1.40
  20 -10   1    8.10    1.40
  20 -10   1    8.80    1.20
 -20 -10  -1    8.20    1.40
  20  10   1    7.60    1.30
  20  10   1    7.70    1.30
  20  10   1    7.10    1.30
  20  10   1    7.90    1.40
 -20  10  -1    8.70    1.50
  20  10   1    8.20    0.90
 -22 -10  -1   -0.70    1.10
 -22 -10  -1   -1.20    0.80
  22 -10   1   -0.40    1.20
  22 -10   1   -0.80    0.60
  22 -10   1   -0.20    0.60
  22 -10   1   -0.50    0.80
  22 -10   1    1.30    1.00
  22 -10   1    0.70    1.00
 -22 -10  -1    0.50    0.90
  22  10   1   -0.40    0.50
  22  10   1    0.50    1.00
  22  10   1   -1.00    1.00
 -22  10  -1   -1.60    1.10
  22  10   1    0.80    1.00
  22  10   1   -1.70    1.00
  24 -10   1    3.80    1.00
  24 -10   1    4.20    0.70
  24 -10   1    4.30    1.30
 -24 -10  -1    2.50    1.40
  24 -10   1    4.60    1.50
 -24 -10  -1    4.10    1.30
  24 -10   1    4.40    1.00
 -24 -10  -1    3.60    1.30
  24 -10   1    5.40    1.30
  24  10   1    3.40    1.20
  24  10   1    3.90    1.20
  24  10   1    1.50    1.40
  24  10   1    3.00    1.20
 -24  10  -1    4.70    1.40
  23 -11  -1    3.00    1.40
  23 -11  -1    3.20    1.10
  23 -11  -1    3.80    0.90
 -23 -11   1    4.50    1.30
  23 -11  -1    2.50    1.40
 -23 -11   1    2.20    1.20
 -23 -11   1    1.20    1.30
  23 -11  -1    2.40    1.00
  23 -11  -1    2.20    1.00
  23  11  -1    3.40    1.30
 -23  11   1    1.70    1.20
  23  11  -1    3.60    1.20
  23  11  -1    2.40    1.20
  23  11  -1    3.30    1.30
  23  11  -1    2.30    0.70
 -21 -11   1    0.60    1.00
  21 -11  -1    0.80    1.10
  21 -11  -1    0.00    0.90
  21 -11  -1   -0.10    0.90
 -21 -11   1   -0.70    0.80
 -21 -11   1   -0.50    1.20
  21 -11  -1    0.20    0.90
  21 -11  -1    0.10    0.70
  21 -11  -1    1.20    1.30
  21  11  -1    0.60    1.10
  21  11  -1    0.70    1.00
  21  11  -1    0.60    1.10
  21  11  -1    0.20    1.00
 -21  11   1   -0.40    1.20
  21  11  -1   -0.70    0.70
  19 -11  -1    5.00    1.10
  19 -11  -1    2.00    1.20
  19 -11  -1    2.40    0.80
 -19 -11   1    2.00    1.10
 -19 -11   1    5.80    1.30
  19 -11  -1    0.90    1.00
  19 -11  -1    2.30    1.00
  19 -11  -1    3.90    1.10
 -19 -11   1    5.60    1.30
  19  11  -1    3.40    1.20
  19  11  -1    2.30    1.10
 -19  11   1    3.40    1.10
  19  11  -1    2.60    0.80
  19  11  -1    2.70    1.20
  19  11  -1    1.90    1.10
 -17 -11   1    0.60    1.00
 -17 -11   1    2.20    1.00
  17 -11  -1    2.40    1.30
  17 -11  -1    1.90    1.00
 -17 -11   1    2.80    1.00
  17 -11  -1    1.00    0.90
  17 -11  -1    0.40    0.90
  17 -11  -1   -0.20    0.80
  17 -11  -1    2.00    1.10
  17  11  -1    0.30    1.10
  17  11  -1    0.00    1.00
  17  11  -1    0.50    0.80
  17  11  -1    0.20    1.10
  17  11  -1    2.30    1.10
 -15 -11   1    8.60    1.30
 -15 -11   1   11.20    1.40
  15 -11  -1    8.70    1.50
  15 -11  -1    7.90    1.10
  15 -11  -1    6.90    1.20
  15 -11  -1    9.30    1.40
  15 -11  -1    9.90    1.30
 -15 -11   1    8.90    1.50
  15 -11  -1    5.70    1.40
  15  11  -1    8.80    1.40
  15  11  -1    5.80    1.10
  15  11  -1    9.30    1.40
  15  11  -1    9.30    1.50
  15  11  -1    9.60    1.40
  13 -11  -1   -0.10    0.80
  13 -11  -1   -0.20    1.00
  13 -11  -1    0.70    0.80
 -13 -11   1    1.10    0.90
  13 -11  -1    0.40    0.90
 -13 -11   1   -0.90    0.80
  13 -11  -1    1.70    0.90
  13 -11  -1    1.80    1.00
 -13 -11   1    1.20    1.10
  13  11  -1    0.60    0.90
  13  11  -1    0.90    1.00
  13  11  -1   -0.90    0.90
  13  11  -1    0.10    0.80
  13  11  -1   -0.70    0.90
  11 -11  -1    2.10    1.00
  11 -11  -1    3.60    1.10
  11 -11  -1    3.50    1.00
  11 -11  -1    4.20    1.10
 -11 -11   1    5.10    1.00
  11 -11  -1    2.40    0.90
  11 -11  -1    4.20    1.00
 -11 -11   1    3.00    1.00
 -11 -11   1    2.70    1.10
  11  11  -1    3.50    1.00
  11  11  -1    5.50    1.10
  11  11  -1    2.80    1.00
  11  11  -1    3.20    1.20
  11  11  -1    3.00    1.00
  -9 -11   1   13.40    1.50
   9 -11  -1    8.80    1.30
  -9 -11   1   12.60    1.30
   9 -11  -1    8.20    1.20
   9 -11  -1   10.90    1.40
   9 -11  -1   10.20    1.30
  -9 -11   1    9.80    1.30
   9 -11  -1   10.00    1.30
   9 -11  -1   13.60    1.40
   9  11  -1   11.40    1.60
   9  11  -1    8.90    1.20
   9  11  -1   12.00    1.40
   9  11  -1    9.40    1.30
  -7 -11   1   21.20    1.60
  -7 -11   1   18.60    1.80
   7 -11  -1   19.90    1.80
   7 -11  -1   19.80    1.70
  -7 -11   1   21.40    1.70
   7 -11  -1   18.70    1.70
   7 -11  -1   20.50    1.70
   7 -11  -1   20.20    1.80
   7 -11  -1   17.90    1.70
   7  11  -1   20.40    1.90
  -7  11   1   21.50    1.60
   7  11  -1   18.90    1.80
   7  11  -1   19.80    1.60
   5 -11  -1   20.80    1.30
   5 -11  -1   18.90    1.60
   5 -11  -1   18.20    1.60
   5 -11  -1   18.40    1.70
  -5 -11   1   18.50    1.80
   5 -11  -1   18.40    1.70
  -5 -11   1   15.90    1.70
   5 -11  -1   17.10    1.70
  -5 -11   1   18.20    1.40
  -5 -11   1   19.30    1.70
  -5 -11   1   19.10    1.40
   5 -11  -1   14.40    1.50
   5  11  -1   18.70    1.70
   5  11  -1   19.10    1.60
  -5  11   1   17.10    1.50
   3 -11  -1   25.50    2.10
   3 -11  -1   26.40    1.60
   3 -11  -1   27.20    1.80
  -3 -11   1   28.70    2.00
   3 -11  -1   28.00    2.00
  -3 -11   1   27.30    1.60
   3 -11  -1   26.90    2.00
  -3 -11   1   27.60    2.10
  -3 -11   1   26.50    1.70
  -3 -11   1   26.70    1.90
  -3 -11   1   28.50    2.10
   3 -11  -1   21.90    1.80
   3 -11  -1   30.20    2.00
  -3  11   1   29.20    1.90
   3  11  -1   27.40    2.00
   3  11  -1   26.90    1.90
   1 -11  -1    1.00    0.80
   1 -11  -1   -0.60    0.90
  -1 -11   1    0.90    0.80
  -1 -11   1    1.10    0.80
  -1 -11   1    0.10    0.70
  -1 -11   1   -0.20    0.80
   1 -11  -1    1.90    1.00
   1 -11  -1    0.60    0.80
  -1 -11   1    0.20    0.60
   1 -11  -1   -0.70    0.70
  -1 -11   1    0.00    0.80
  -1 -11   1   -1.40    0.80
   1 -11  -1    0.90    0.90
   1 -11  -1   -1.20    0.60
   1  11  -1    0.60    0.80
  -1  11   1   -0.60    0.70
  -1  11   1    0.60    0.80
   1  11  -1   -0.10    0.70
  -1 -11  -1    1.10    0.80
   1 -11   1    0.10    0.90
   1 -11   1    1.00    0.80
   1 -11   1    0.20    0.90
  -1 -11  -1   -0.40    0.80
   1 -11   1    1.20    0.60
   1 -11   1   -0.10    0.80
  -1 -11  -1   -0.20    0.90
  -1 -11  -1    0.60    0.60
  -1 -11  -1    1.80    0.90
  -1 -11  -1    0.20    0.80
  -1 -11  -1    0.60    0.70
   1 -11   1    0.70    0.80
   1 -11   1    0.40    0.80
  -1  11  -1    0.90    0.70
   1  11   1    1.50    0.90
   1  11   1   -0.70    0.80
  -1  11  -1    0.10    0.80
  -3 -11  -1   13.00    1.50
   3 -11   1   14.10    1.50
   3 -11   1   12.90    1.40
  -3 -11  -1   13.60    1.60
   3 -11   1   13.60    1.50
  -3 -11  -1   14.70    1.30
   3 -11   1   13.30    1.50
  -3 -11  -1   13.40    1.60
  -3 -11  -1   16.00    1.30
   3 -11   1   13.70    1.50
   3 -11   1   13.20    1.40
  -3  11  -1   14.30    1.40
   3  11   1   15.70    1.40
   3  11   1   14.70    1.60
  -5 -11  -1    5.80    1.20
   5 -11   1    8.20    1.40
   5 -11   1    8.40    1.30
  -5 -11  -1    8.80    1.10
   5 -11   1    7.00    1.20
  -5 -11  -1    5.90    1.10
   5 -11   1    9.20    1.20
   5 -11   1    5.80    1.10
   5 -11   1    8.20    1.20
   5  11   1    8.30    1.30
   5  11   1    7.70    1.30
   5  11   1    7.80    1.10
  -5  11  -1    6.00    1.10
   7 -11   1    6.90    1.20
   7 -11   1    5.30    1.10
  -7 -11  -1    6.70    1.20
   7 -11   1    6.10    1.10
  -7 -11  -1    5.00    1.10
   7 -11   1    6.40    1.10
   7 -11   1    5.60    1.10
   7 -11   1    5.70    1.20
  -7 -11  -1    7.20    1.10
  -7  11  -1    5.60    1.00
   7  11   1    6.50    1.10
   7  11   1    6.10    1.20
   7  11   1    5.20    1.00
   7  11   1    6.10    1.20
  -9 -11  -1   -1.00    0.80
   9 -11   1   -0.40    0.80
   9 -11   1   -0.50    0.90
  -9 -11  -1    2.00    0.80
   9 -11   1    0.80    0.80
   9 -11   1   -0.30    0.80
   9 -11   1   -1.00    0.80
  -9 -11  -1   -0.10    0.80
   9 -11   1   -0.90    0.80
   9  11   1    1.70    1.10
   9  11   1    1.70    0.90
  -9  11  -1   -0.20    0.70
   9  11   1    1.00    0.90
   9  11   1    0.30    0.80
   9  11   1   -1.10    0.80
 -11 -11  -1   15.90    1.70
  11 -11   1   12.40    1.40
 -11 -11  -1   17.30    1.60
  11 -11   1   12.70    1.50
  11 -11   1   14.80    1.50
  11 -11   1   11.80    1.30
  11 -11   1   15.00    1.70
  11 -11   1   17.90    1.60
 -11 -11  -1   13.30    1.50
  11  11   1   12.60    1.50
  11  11   1   13.00    1.30
  11  11   1   11.20    1.50
  11  11   1   12.00    1.50
  11  11   1   15.00    1.60
  13 -11   1   24.40    2.00
 -13 -11  -1   28.60    2.20
  13 -11   1   27.00    2.00
  13 -11   1   28.70    2.00
 -13 -11  -1   30.10    2.10
  13 -11   1   28.30    2.10
  13 -11   1   29.70    2.00
  13 -11   1   30.10    2.00
 -13 -11  -1   31.30    2.00
  13  11   1   31.10    1.90
  13  11   1   30.80    2.20
  13  11   1   30.60    2.20
  13  11   1   27.80    2.20
  13  11   1   28.30    2.20
 -15 -11  -1    4.00    1.20
  15 -11   1    7.10    1.20
  15 -11   1    6.10    1.20
  15 -11   1    7.10    1.40
  15 -11   1    6.70    1.10
  15 -11   1    6.80    1.20
 -15 -11  -1    5.10    1.10
  15 -11   1    6.40    1.10
 -15 -11  -1    8.70    1.30
  15  11   1    7.40    1.10
  15  11   1    5.90    1.30
  15  11   1    4.70    1.20
  15  11   1    4.70    1.30
  15  11   1    5.00    1.30
 -17 -11  -1    1.50    0.90
  17 -11   1    1.70    0.80
 -17 -11  -1    2.30    1.10
  17 -11   1    0.70    1.00
  17 -11   1    0.50    0.80
 -17 -11  -1    2.00    1.10
  17 -11   1    1.30    0.90
  17 -11   1    1.70    1.20
  17 -11   1    1.50    1.00
  17  11   1   -0.30    1.00
  17  11   1    0.90    1.00
  17  11   1    0.00    1.20
  17  11   1    0.70    1.10
  17  11   1    0.90    0.80
  19 -11   1    3.90    1.40
 -19 -11  -1    3.90    1.20
  19 -11   1    2.00    1.30
 -19 -11  -1    4.30    1.20
 -19 -11  -1    1.50    1.00
  19 -11   1    3.80    1.10
  19 -11   1    3.00    1.00
  19 -11   1    3.60    1.10
  19 -11   1    4.10    0.80
  19  11   1    4.50    0.90
  19  11   1    3.00    1.20
  19  11   1    3.60    1.20
  19  11   1    2.60    1.10
  19  11   1    3.70    1.30
 -21 -11  -1    3.00    1.30
  21 -11   1    2.60    1.20
 -21 -11  -1    2.90    1.20
 -21 -11  -1    4.00    1.30
  21 -11   1    0.80    1.30
  21 -11   1    2.30    1.10
  21 -11   1    2.90    0.80
  21 -11   1    3.00    1.00
  21 -11   1    1.00    0.90
  21  11   1    1.70    1.20
 -21  11  -1    3.60    1.40
  21  11   1    0.70    1.10
  21  11   1    2.50    1.20
  21  11   1    2.00    0.80
  21  11   1    2.40    1.20
 -20 -12   1    6.30    1.40
  20 -12  -1    8.60    1.40
  20 -12  -1    4.70    1.50
 -20 -12   1   10.00    1.70
 -20 -12   1    5.30    1.40
  20 -12  -1    7.20    1.10
  20 -12  -1    6.30    1.50
  20 -12  -1    7.80    1.30
  20 -12  -1    8.30    1.40
  20  12  -1    7.30    1.40
  20  12  -1    5.20    1.40
  20  12  -1    6.80    1.10
  20  12  -1    5.00    1.40
 -20  12   1    8.20    1.50
  20  12  -1    5.10    1.50
 -18 -12   1    0.00    1.20
  18 -12  -1   -0.40    1.00
  18 -12  -1    3.10    1.40
  18 -12  -1    0.40    0.90
 -18 -12   1    1.00    1.00
  18 -12  -1   -0.10    0.80
  18 -12  -1   -1.70    1.00
 -18 -12   1   -0.50    1.00
  18 -12  -1   -0.90    0.90
  18  12  -1   -1.80    1.00
  18  12  -1   -0.20    0.80
  18  12  -1   -0.20    1.00
  18  12  -1    0.30    1.10
  18  12  -1   -0.60    1.10
 -18  12   1   -0.30    1.00
 -16 -12   1    5.40    1.50
 -16 -12   1    7.90    1.40
  16 -12  -1    5.60    1.50
  16 -12  -1    5.20    1.20
  16 -12  -1    3.90    1.00
  16 -12  -1    5.60    1.40
  16 -12  -1    3.80    1.20
 -16 -12   1    5.00    1.20
  16 -12  -1    6.40    1.20
  16  12  -1    3.60    1.40
  16  12  -1    5.60    1.10
  16  12  -1    5.10    1.30
  16  12  -1    6.40    1.40
  16  12  -1    6.30    1.30
 -14 -12   1   16.00    1.80
 -14 -12   1   13.00    1.50
  14 -12  -1   15.20    1.60
  14 -12  -1   13.50    1.60
 -14 -12   1   11.70    1.60
  14 -12  -1   12.70    1.60
  14 -12  -1   12.50    1.60
  14 -12  -1   12.00    1.50
  14 -12  -1   11.50    1.40
  14  12  -1    9.60    1.50
  14  12  -1   12.20    1.60
  14  12  -1    9.50    1.60
  14  12  -1   11.00    1.40
  12 -12  -1    2.70    1.00
 -12 -12   1    3.70    1.20
  12 -12  -1    0.80    0.90
  12 -12  -1    1.60    1.00
  12 -12  -1    0.50    0.90
 -12 -12   1    2.20    1.00
  12 -12  -1    2.30    1.20
 -12 -12   1    3.30    1.00
  12 -12  -1    3.00    1.10
  12  12  -1    0.60    1.10
  12  12  -1    1.00    1.00
  12  12  -1    3.00    1.10
  10 -12  -1    8.30    1.30
 -10 -12   1    8.00    1.30
  10 -12  -1    9.20    1.40
  10 -12  -1    5.90    1.20
  10 -12  -1    7.40    1.20
 -10 -12   1    7.20    1.30
 -10 -12   1    7.70    1.20
  10 -12  -1    3.10    1.20
  10 -12  -1    6.10    1.40
  10  12  -1    7.00    1.30
  10  12  -1    6.90    1.20
  10  12  -1    8.30    1.50
  -8 -12   1    1.10    1.00
   8 -12  -1    1.20    1.00
   8 -12  -1    1.70    0.90
   8 -12  -1    0.40    1.00
   8 -12  -1    0.30    0.90
  -8 -12   1    2.20    1.00
   8 -12  -1    0.60    0.80
  -8 -12   1    1.20    0.80
   8 -12  -1    2.00    1.00
   8  12  -1    1.60    0.90
   8  12  -1   -0.10    0.90
   6 -12  -1    5.40    1.20
  -6 -12   1    5.40    1.20
   6 -12  -1    4.80    1.20
   6 -12  -1    6.10    1.20
   6 -12  -1    4.70    1.10
  -6 -12   1    6.30    1.00
   6 -12  -1    4.00    1.00
   6 -12  -1    5.00    1.10
  -6 -12   1    5.40    1.20
   6  12  -1    5.80    1.10
   6  12  -1    5.80    1.30
  -6  12   1    4.40    1.00
   4 -12  -1    2.20    1.00
  -4 -12   1    3.70    1.20
   4 -12  -1    4.50    1.10
   4 -12  -1    3.90    1.10
   4 -12  -1    3.80    1.10
  -4 -12   1    2.50    1.00
   4 -12  -1    3.00    1.00
   4 -12  -1    2.30    1.00
  -4 -12   1    1.40    1.10
   4  12  -1    3.00    1.00
  -4  12   1    2.40    0.90
   4  12  -1    3.10    1.00
   2 -12  -1    7.20    1.30
   2 -12  -1    8.20    1.30
   2 -12  -1    5.60    1.20
  -2 -12   1    7.10    1.20
  -2 -12   1    5.50    1.00
   2 -12  -1    7.60    1.30
   2 -12  -1    8.00    1.10
   2 -12  -1    6.60    1.30
  -2 -12   1    7.50    1.30
  -2 -12   1    8.00    1.40
   2  12  -1    7.70    1.30
  -2  12   1    7.50    1.20
   2  12  -1    6.30    1.20
   0 -12  -1    5.80    1.00
   0 -12  -1    6.50    1.20
   0 -12   1    5.70    1.30
   0 -12   1    6.80    1.20
   0 -12   1    5.20    1.10
   0 -12   1    6.00    1.20
   0 -12   1    7.20    1.20
   0 -12  -1    6.20    1.20
   0 -12   1    6.50    1.20
   0 -12  -1    6.60    1.30
   0 -12  -1    5.50    1.20
   0  12  -1    5.60    1.20
   0  12   1    6.60    1.10
   0  12  -1    6.30    1.20
   0  12   1    3.90    1.10
   2 -12   1   -0.20    1.00
  -2 -12  -1    0.50    0.70
   2 -12   1    1.10    0.90
  -2 -12  -1    1.90    1.00
  -2 -12  -1    0.20    0.80
  -2 -12  -1   -0.10    0.80
   2 -12   1   -0.30    0.90
   2 -12   1    1.00    1.00
   2 -12   1    2.90    1.00
   2 -12   1    1.20    0.90
   2  12   1    2.40    1.00
   2  12   1    2.20    0.90
  -2  12  -1    0.90    0.90
   4 -12   1    4.90    1.20
  -4 -12  -1    6.70    1.10
   4 -12   1    5.90    1.20
   4 -12   1    6.60    1.20
   4 -12   1    5.40    1.20
   4 -12   1    5.80    1.20
  -4 -12  -1    5.90    1.30
   4 -12   1    5.10    1.20
  -4 -12  -1    5.20    1.30
  -4  12  -1    4.80    1.00
   4  12   1    5.60    1.10
   4  12   1    5.30    1.10
   6 -12   1    2.00    1.00
   6 -12   1    3.70    1.00
   6 -12   1    1.20    1.00
   6 -12   1    2.20    1.10
   6 -12   1    0.20    1.00
  -6 -12  -1    1.60    1.00
   6 -12   1    2.30    0.90
  -6 -12  -1    1.80    0.80
  -6 -12  -1    0.40    0.90
   6  12   1    2.00    1.00
   6  12   1    0.00    0.90
  -6  12  -1    3.00    0.90
  -8 -12  -1    6.70    1.40
   8 -12   1    6.70    1.20
  -8 -12  -1    6.10    1.10
   8 -12   1    6.30    1.20
   8 -12   1    4.20    1.10
  -8 -12  -1    6.80    1.20
   8 -12   1    5.90    1.30
   8 -12   1    3.70    1.10
   8 -12   1    5.10    1.10
   8  12   1    5.70    1.30
   8  12   1    4.00    1.10
   8  12   1    3.80    1.10
  10 -12   1    0.60    1.00
 -10 -12  -1    0.30    0.80
 -10 -12  -1    0.50    0.90
  10 -12   1   -0.70    0.90
  10 -12   1   -0.80    0.90
  10 -12   1    0.70    0.90
 -10 -12  -1    0.40    1.10
  10 -12   1    0.30    0.90
  10 -12   1   -0.80    0.90
  10  12   1    0.00    0.90
  10  12   1   -0.10    1.00
  10  12   1   -0.80    0.90
  12 -12   1    1.80    1.00
  12 -12   1    0.80    0.90
 -12 -12  -1   -0.30    0.90
 -12 -12  -1   -0.70    0.80
  12 -12   1    0.30    0.90
  12 -12   1    0.30    1.00
  12 -12   1   -0.60    0.90
 -12 -12  -1    0.90    0.90
  12 -12   1   -1.50    0.90
  12  12   1    0.40    1.00
  12  12   1   -0.20    1.00
  12  12   1   -0.20    0.90
  12  12   1    0.50    1.00
  14 -12   1    6.60    1.20
  14 -12   1    3.80    1.00
  14 -12   1    2.10    1.20
 -14 -12  -1    5.30    1.30
  14 -12   1    4.90    1.20
 -14 -12  -1    6.10    1.20
  14 -12   1    6.00    1.20
  14 -12   1    5.00    1.20
 -14 -12  -1    5.20    1.20
  14  12   1    3.70    1.20
  14  12   1    6.10    1.50
  14  12   1    3.30    1.20
  14  12   1    5.60    1.30
  14  12   1    6.90    1.20
  16 -12   1    5.20    1.50
  16 -12   1    5.60    1.20
  16 -12   1    5.00    1.10
  16 -12   1    6.30    1.50
 -16 -12  -1    6.20    1.20
  16 -12   1    6.60    1.20
 -16 -12  -1    6.80    1.50
 -16 -12  -1    8.20    1.40
  16 -12   1    4.70    1.20
  16  12   1    4.50    1.30
  16  12   1    7.80    1.40
  16  12   1    7.30    1.50
  16  12   1    6.80    1.40
  16  12   1    5.70    1.10
 -18 -12  -1    5.00    1.20
  18 -12   1    3.90    1.30
  18 -12   1    4.20    1.20
 -18 -12  -1    2.30    1.20
  18 -12   1    3.80    0.90
  18 -12   1    5.40    1.20
  18 -12   1    4.90    1.20
  18 -12   1    3.40    1.50
 -18 -12  -1    7.50    1.60
  18  12   1    5.90    1.40
  18  12   1    4.40    1.50
  18  12   1    3.70    1.00
  18  12   1    4.70    1.30
  18  12   1    4.80    1.30
  15 -13  -1    0.20    1.10
  15 -13  -1    2.30    1.20
  15 -13  -1    1.80    1.20
  15 -13  -1    3.10    1.10
 -15 -13   1    1.50    1.10
 -15 -13   1    0.10    1.00
  15 -13  -1    0.60    1.10
  15 -13  -1    0.60    0.90
 -15 -13   1    0.50    1.10
  15  13  -1    2.30    1.30
  15  13  -1    3.60    1.20
  15  13  -1    1.90    1.20
  13 -13  -1   -0.50    1.20
  13 -13  -1    0.30    1.10
  13 -13  -1    0.00    0.90
 -13 -13   1   -0.10    1.10
 -13 -13   1    1.10    0.90
  13 -13  -1    1.60    1.10
 -13 -13   1    1.10    1.00
  13 -13  -1   -1.20    1.00
  13 -13  -1    0.00    1.00
  13  13  -1    0.10    1.00
  13  13  -1   -0.70    1.10
  13  13  -1   -0.50    1.20
  11 -13  -1   -0.30    1.00
  11 -13  -1   -1.50    1.20
  11 -13  -1    0.40    0.90
  11 -13  -1    1.60    1.10
 -11 -13   1    1.10    1.00
  11 -13  -1    0.90    0.90
 -11 -13   1    0.90    1.20
  11 -13  -1    0.20    1.00
  11  13  -1    0.50    1.00
  11  13  -1    0.60    1.00
   9 -13  -1   -0.10    1.00
  -9 -13   1    0.30    0.90
   9 -13  -1    0.50    1.00
   9 -13  -1   -1.10    0.90
   9 -13  -1    0.00    1.10
   9 -13  -1   -1.20    0.90
   9 -13  -1   -1.00    1.00
  -9 -13   1    0.00    0.90
   9  13  -1    1.70    1.00
   9  13  -1    1.30    1.00
   7 -13  -1    6.30    1.20
  -7 -13   1    6.90    1.40
   7 -13  -1    6.70    1.30
   7 -13  -1    6.00    1.20
   7 -13  -1    7.20    1.30
   7 -13  -1    7.50    1.30
  -7 -13   1    3.90    1.30
   7 -13  -1    5.60    1.40
   7  13  -1    7.00    1.30
   7  13  -1    4.90    1.20
   5 -13  -1    2.20    1.10
   5 -13  -1   -0.60    1.10
   5 -13  -1   -0.40    0.90
  -5 -13   1    0.10    0.90
  -5 -13   1   -0.20    0.90
   5 -13  -1    0.90    1.00
   5 -13  -1    0.90    0.90
   5 -13  -1   -0.50    0.80
   5  13  -1    1.00    1.10
   5  13  -1    0.30    1.00
  -3 -13   1    0.90    1.00
  -3 -13   1    0.00    1.00
   3 -13  -1    0.80    1.10
   3 -13  -1    0.00    0.90
   3 -13  -1    2.90    1.10
   3 -13  -1    1.90    1.10
   3 -13  -1    1.20    0.90
  -3  13   1    2.20    1.00
   3  13  -1    1.60    1.00
   3  13  -1    1.30    1.10
   1 -13  -1    0.50    0.90
  -1 -13   1    1.90    1.10
  -1 -13   1    2.70    1.10
   1 -13  -1    2.80    1.00
   1 -13  -1    3.50    1.00
  -1 -13   1    3.40    1.20
   1 -13  -1    3.20    1.20
  -1  13   1    3.30    1.10
   1  13  -1    2.30    0.90
   1 -13   1    3.30    1.20
   1 -13   1    1.90    1.20
  -1 -13  -1    2.00    1.10
   1 -13   1    1.30    0.90
   1 -13   1    0.00    1.00
  -1 -13  -1    1.90    1.10
  -1 -13  -1    2.80    1.00
  -1  13  -1    2.30    1.10
   1  13   1    1.40    0.90
   1  13   1    1.50    1.00
   3 -13   1    0.40    0.90
   3 -13   1   -2.10    1.00
   3 -13   1    0.50    1.00
   3 -13   1   -0.70    0.90
   3 -13   1    1.10    0.90
  -3 -13  -1    0.80    1.10
  -3 -13  -1    1.20    0.90
   3 -13   1    0.20    1.00
   3  13   1    0.80    1.00
  -3  13  -1    1.20    0.90
   3  13   1    0.30    1.00
   5 -13   1   -1.00    0.90
   5 -13   1   -0.60    0.90
  -5 -13  -1   -1.00    0.90
   5 -13   1    1.40    1.20
  -5 -13  -1   -0.60    0.90
   5 -13   1   -1.00    0.80
   5 -13   1   -0.90    0.90
   5 -13   1    0.50    1.00
   5  13   1   -0.30    1.00
  -5  13  -1    0.60    0.90
   5  13   1   -1.30    0.90
  -7 -13  -1    3.00    1.10
   7 -13   1    2.30    1.00
   7 -13   1    3.80    1.20
   7 -13   1    2.70    1.10
  -7 -13  -1    3.50    1.30
   7 -13   1    3.10    1.20
   7 -13   1    2.40    1.30
   7 -13   1    2.90    1.00
   7  13   1    4.00    1.20
   7  13   1    4.50    1.10
   9 -13   1    0.10    1.00
  -9 -13  -1   -0.20    0.90
   9 -13   1    0.10    1.00
  -9 -13  -1    0.70    0.80
   9 -13   1    0.50    0.90
   9 -13   1    1.00    1.20
   9 -13   1    0.20    0.90
   9 -13   1    0.60    1.00
  -9 -13  -1    1.10    1.20
   9  13   1   -0.30    1.00
   9  13   1    1.40    1.00
  11 -13   1    4.20    1.40
  11 -13   1    4.60    1.10
  11 -13   1    4.20    1.20
 -11 -13  -1    3.40    1.10
 -11 -13  -1    4.90    1.30
 -11 -13  -1    4.60    1.40
  11 -13   1    4.90    1.30
  11 -13   1    0.90    1.20
  11 -13   1    3.30    1.10
  11  13   1    2.10    1.10
  11  13   1    3.10    1.20
 -13 -13  -1    0.30    1.10
  13 -13   1    0.10    1.30
  13 -13   1    1.00    0.90
  13 -13   1    1.40    0.90
  13 -13   1    1.00    1.20
 -13 -13  -1    2.00    1.20
  13 -13   1    0.70    1.10
 -13 -13  -1    1.00    1.00
  13 -13   1    1.80    1.10
  13  13   1    3.10    1.10
  13  13   1    1.50    1.20
  13  13   1   -1.90    1.00
  15 -13   1   -0.90    1.00
 -15 -13  -1    2.90    1.10
  15 -13   1    0.00    1.30
  15 -13   1    0.20    1.20
 -15 -13  -1   -0.10    1.00
  15 -13   1    0.60    1.00
 -15 -13  -1    1.90    1.40
  15 -13   1   -0.40    1.10
  15 -13   1    1.00    1.10
  15  13   1    0.60    1.00
  15  13   1    0.70    1.40
  15  13   1    1.80    1.30
  12 -14  -1   -0.30    1.00
  12 -14  -1    0.50    1.10
 -12 -14   1    0.70    1.10
 -12 -14   1    2.70    1.30
  12 -14  -1    0.10    1.20
  12 -14  -1   -0.20    1.20
  12 -14  -1    0.20    1.00
  12 -14  -1    0.60    1.20
  12  14  -1    0.40    1.00
  12  14  -1   -0.60    1.10
  10 -14  -1    0.80    1.10
  10 -14  -1   -1.00    1.10
 -10 -14   1    1.10    1.30
 -10 -14   1   -0.90    1.00
  10 -14  -1   -1.30    1.30
  10 -14  -1    0.70    1.10
  10 -14  -1   -0.60    0.90
  10 -14  -1    2.00    1.20
  10  14  -1   -0.80    1.10
  10  14  -1   -0.20    1.10
   8 -14  -1    5.10    1.40
   8 -14  -1    3.10    1.30
   8 -14  -1    2.30    1.20
  -8 -14   1    5.40    1.30
   8 -14  -1    4.80    1.30
  -8 -14   1    3.70    1.30
   8 -14  -1    1.80    1.10
   8 -14  -1    2.80    1.30
   8  14  -1    6.50    1.30
   8  14  -1    3.90    1.30
   6 -14  -1   13.60    1.70
   6 -14  -1   15.70    2.00
  -6 -14   1   12.80    1.70
  -6 -14   1   13.20    1.70
   6 -14  -1   11.30    1.70
   6 -14  -1   14.10    1.80
   6 -14  -1   13.80    1.70
   6 -14  -1   10.70    1.60
   6  14  -1   13.60    1.60
   6  14  -1    9.40    1.70
   4 -14  -1   -1.10    1.10
  -4 -14   1    0.00    0.90
   4 -14  -1   -0.20    1.00
   4 -14  -1    0.60    1.10
   4 -14  -1   -0.70    0.90
  -4 -14   1    1.70    1.10
   4  14  -1    1.70    1.20
   4  14  -1    0.00    1.00
  -2 -14   1    1.60    1.20
   2 -14  -1   -0.80    0.90
  -2 -14   1    1.60    1.00
   2 -14  -1    1.40    1.10
   2 -14  -1    0.50    1.10
   2  14  -1   -1.00    1.00
  -2  14   1    1.40    1.00
   0 -14   1   -1.00    1.20
   0 -14  -1   -0.80    0.90
   0 -14   1   -0.90    0.90
   0 -14  -1    2.90    1.10
   0 -14   1    0.10    0.90
   0  14   1    0.30    1.00
   0  14  -1    1.00    0.90
   2 -14   1    0.90    1.40
   2 -14   1   -0.20    1.00
  -2 -14  -1    0.00    1.10
   2 -14   1    0.70    1.00
   2 -14   1    1.10    1.10
  -2 -14  -1   -1.80    0.80
   2  14   1   -0.90    1.00
  -2  14  -1    1.20    1.00
   2  14   1    1.70    1.20
   4 -14   1    2.70    1.30
  -4 -14  -1    2.00    1.10
   4 -14   1    5.50    1.30
  -4 -14  -1    4.20    1.20
   4 -14   1    1.80    1.00
   4 -14   1    3.90    1.30
   4 -14   1    2.50    1.20
   4  14   1    4.10    1.20
   4  14   1    2.50    1.10
  -6 -14  -1   -1.20    0.90
   6 -14   1   -0.60    1.30
   6 -14   1    0.70    1.10
   6 -14   1    1.00    1.10
   6 -14   1    0.10    1.10
  -6 -14  -1   -1.40    1.00
   6 -14   1   -0.70    0.80
   6 -14   1    1.10    1.10
   6  14   1    1.70    1.10
   6  14   1    0.20    1.10
   8 -14   1    6.90    1.40
   8 -14   1    4.30    1.40
   8 -14   1    5.00    1.30
  -8 -14  -1    6.30    1.40
  -8 -14  -1    5.40    1.40
   8 -14   1    5.60    1.50
   8 -14   1    7.20    1.40
   8 -14   1    5.20    1.20
   8  14   1    3.70    1.20
   8  14   1    5.00    1.40
  10 -14   1    4.60    1.30
 -10 -14  -1    3.30    1.50
  10 -14   1    2.10    1.10
 -10 -14  -1    3.80    1.30
  10 -14   1    3.10    1.30
  10 -14   1    4.90    1.30
  10 -14   1    1.70    1.40
  10 -14   1    3.40    1.20
  10  14   1    4.20    1.30
  10  14   1    2.30    1.40
  34   0  -2    3.90    0.80
 -34   0   2    1.10    1.30
  34   0  -2    4.80    1.40
  34   0  -2    2.60    1.20
  34   0  -2    2.60    0.70
 -34   0   2    1.60    1.00
 -34   0   2    3.00    1.20
  34   0  -2    4.90    1.40
  32   0  -2    3.00    0.70
  32   0  -2    3.90    1.10
  32   0  -2    1.00    0.90
 -32   0   2    2.40    1.00
 -32   0   2    2.30    1.20
  32   0  -2    3.90    0.70
  32   0  -2    4.30    1.30
 -32   0   2    2.00    1.00
  30   0  -2   -0.20    1.00
 -30   0   2    1.90    0.80
  30   0  -2   -0.40    0.50
 -30   0   2   -0.30    0.80
  30   0  -2   -0.30    0.90
 -30   0   2   -0.60    0.80
  30   0  -2    0.90    1.00
  30   0  -2   -0.40    0.50
  28   0  -2    1.70    0.90
  28   0  -2    1.80    0.50
 -28   0   2    2.00    1.00
 -28   0   2    1.50    0.80
  28   0  -2    2.10    0.90
  28   0  -2    0.80    0.50
 -28   0   2    1.40    0.90
  28   0  -2    1.60    0.80
  28   0  -2    1.50    0.80
  26   0  -2    0.30    0.40
  26   0  -2   -0.10    0.40
 -26   0   2    0.40    0.80
  26   0  -2    0.80    0.80
  26   0  -2   -0.70    0.70
  26   0  -2    0.80    0.80
 -26   0   2   -1.00    0.70
  26   0  -2   -0.70    0.50
 -26   0   2    0.20    0.70
  24   0  -2   18.50    1.10
  24   0  -2   21.60    1.20
  24   0  -2   18.70    1.50
  24   0  -2   17.70    0.80
  24   0  -2   20.70    1.10
 -24   0   2   18.50    1.50
  24   0  -2   19.30    1.30
  24   0  -2   20.00    0.90
  24   0  -2   18.70    1.60
 -24   0   2   16.60    1.40
  24   0  -2   19.20    1.70
 -24   0   2   19.60    1.50
  22   0  -2   11.60    0.60
  22   0  -2    9.40    0.60
 -22   0   2   10.50    1.20
  22   0  -2    9.00    0.70
  22   0  -2   11.50    0.80
  22   0  -2   11.20    1.10
  22   0  -2   10.60    0.80
  22   0  -2   10.80    1.00
 -22   0   2    8.90    1.00
  22   0  -2    8.80    1.10
  22   0  -2    9.60    0.70
  22   0  -2   10.60    1.10
 -22   0   2    8.80    1.00
  22   0  -2    8.60    0.70
 -20   0   2   16.50    1.20
  20   0  -2   17.40    0.80
  20   0  -2   16.20    0.80
  20   0  -2   14.00    1.30
  20   0  -2   16.70    1.00
  20   0  -2   15.10    1.20
  20   0  -2   16.00    0.80
  20   0  -2   14.30    1.20
  20   0  -2   14.80    0.90
 -20   0   2   15.50    1.40
 -20   0   2   14.10    1.10
  20   0  -2   16.00    1.10
  18   0  -2    1.00    0.30
  18   0  -2    0.70    0.50
  18   0  -2    0.30    0.30
  18   0  -2    0.60    0.30
  18   0  -2    0.40    0.50
  18   0  -2    0.60    0.30
 -18   0   2    0.60    0.50
  18   0  -2    0.20    0.40
 -18   0   2    0.30    0.50
  18   0  -2    0.80    0.30
  18   0  -2    0.90    0.30
 -18   0   2    0.20    0.50
  18   0  -2    0.20    0.20
  18   0  -2    0.60    0.60
  16   0  -2   17.10    0.80
 -16   0   2   17.00    1.10
  16   0  -2   16.30    0.80
 -16   0   2   15.10    1.10
 -16   0   2   14.70    1.00
  16   0  -2   17.10    0.90
  16   0  -2   16.20    0.80
  16   0  -2   17.30    1.20
  16   0  -2   17.20    1.10
  16   0  -2   16.40    1.00
  16   0  -2   19.80    0.90
  16   0  -2   17.20    1.10
  16   0  -2   19.60    0.80
  16   0  -2   16.60    0.80
  14   0  -2  306.87   10.70
  14   0  -2  301.07   10.80
  14   0  -2  304.47   10.40
  14   0  -2  333.17   10.80
  14   0  -2  323.87   10.70
 -14   0   2  296.17   10.70
  14   0  -2  290.87   10.80
  14   0  -2  328.17   10.70
 -14   0   2  294.67   10.90
  14   0  -2  307.97   10.80
  14   0  -2  296.67   10.70
  12   0  -2    5.80    0.50
 -12   0   2    5.30    0.60
  12   0  -2    5.50    0.60
  12   0  -2    5.00    0.40
  12   0  -2    5.30    0.40
  12   0  -2    5.90    0.50
  12   0  -2    4.50    0.60
 -12   0   2    6.10    0.60
  12   0  -2    5.60    0.60
  12   0  -2    5.20    0.40
  12   0  -2    4.50    0.40
  12   0  -2    6.30    0.50
  12   0  -2    4.30    0.40
   8   0  -2 8002.10  306.37
   8   0  -2 9493.05  303.57
   8   0  -2 7794.82  310.47
   8   0  -2 9238.78  306.27
  -8   0   2 9101.99  297.67
   8   0  -2 8845.32  302.37
   8   0  -2 9267.17  311.47
   8   0  -2 8800.42  311.07
  -8   0   2 9207.28  305.67
  -6   0   2 1806.12   58.79
   6   0  -2 1664.33   58.49
   6   0  -2 1756.72   60.19
  -6   0   2 1783.72   60.29
   6   0  -2 1731.83   61.59
   6   0  -2 1778.72   60.19
   4   0  -2  281.87   10.70
  -4   0   2  311.07   10.50
  -4   0   2  311.67   10.80
   4   0  -2  290.67   10.70
   4   0  -2  284.97   10.90
   4   0  -2  305.17   10.60
   2   0  -2 1969.30   61.69
   2   0  -2 1610.74   61.59
   2   0  -2 1882.01   62.39
  -2   0   2 1822.62   62.39
   0   0  -2  217.88    8.10
   0   0   2  254.47    8.10
   0   0   2  237.08    7.90
  -2   0  -2   51.39    1.70
   2   0   2   44.10    1.60
   2   0   2   40.50    1.80
   2   0   2   48.80    1.70
   2   0   2   49.90    1.70
   2   0   2   50.19    1.70
   2   0   2   47.30    1.70
   4   0   2  195.88    7.10
   4   0   2  201.48    7.00
   4   0   2  198.18    6.70
   4   0   2  198.88    6.80
   4   0   2  197.58    6.90
   4   0   2  195.88    6.80
   6   0   2   44.80    1.50
   6   0   2   41.60    1.60
   6   0   2   42.50    1.70
   6   0   2   41.30    1.70
   6   0   2   41.70    1.60
   6   0   2   42.00    1.60
   6   0   2   41.10    1.60
   8   0   2   62.99    2.30
  -8   0  -2   59.99    2.20
   8   0   2   53.09    2.00
   8   0   2   59.39    2.30
   8   0   2   62.59    2.10
   8   0   2   59.69    2.20
   8   0   2   58.39    2.30
   8   0   2   58.39    2.30
   8   0   2   58.69    2.30
  10   0   2   98.39    3.40
  10   0   2  102.79    3.30
  10   0   2   96.29    3.60
  10   0   2   79.79    3.60
 -10   0  -2   95.79    3.50
  12   0   2   16.40    1.00
  12   0   2   15.30    1.00
 -12   0  -2   17.00    1.00
  12   0   2   17.40    1.00
  12   0   2   17.10    1.00
 -12   0  -2   16.80    1.00
  14   0   2  304.07   10.20
 -14   0  -2  292.37   10.70
 -14   0  -2  301.67   10.60
  14   0   2  305.97   10.70
  14   0   2  302.87   10.80
 -14   0  -2  280.17   10.30
  14   0   2  289.07   10.30
  14   0   2  292.47   10.40
  14   0   2  298.87   10.60
  14   0   2  294.17   10.40
  16   0   2   51.99    1.80
 -16   0  -2   47.00    2.20
  16   0   2   47.30    1.80
  16   0   2   49.10    1.70
  16   0   2   53.29    1.80
  16   0   2   47.80    2.20
 -16   0  -2   45.40    2.10
  16   0   2   50.59    2.20
  16   0   2   50.89    2.00
  16   0   2   49.10    2.20
  16   0   2   49.80    2.20
  16   0   2   48.60    2.20
 -16   0  -2   46.30    2.10
  18   0   2    3.30    0.70
  18   0   2    2.00    0.50
  18   0   2    3.90    0.70
  18   0   2    3.00    0.30
 -18   0  -2    3.80    0.60
 -18   0  -2    3.10    0.60
  18   0   2    2.80    0.30
  18   0   2    2.80    0.30
  18   0   2    3.30    0.60
  18   0   2    3.20    0.30
  18   0   2    3.10    0.70
 -18   0  -2    4.00    0.70
  20   0   2    2.10    0.40
 -20   0  -2    2.50    0.60
  20   0   2    2.40    0.30
  20   0   2    1.50    0.30
 -20   0  -2    1.40    0.60
  20   0   2    1.70    0.70
  20   0   2    1.90    0.50
  20   0   2    1.60    0.70
  20   0   2    1.10    0.30
 -20   0  -2    1.40    0.70
  20   0   2    2.20    0.80
  20   0   2    2.00    0.60
  22   0   2   15.50    0.80
 -22   0  -2   15.00    1.20
  22   0   2   16.50    1.30
 -22   0  -2   14.70    1.20
  22   0   2   15.90    0.80
 -22   0  -2   14.10    1.40
  22   0   2   14.90    1.10
  22   0   2   14.60    1.40
  22   0   2   13.90    0.80
  22   0   2   14.90    1.40
  22   0   2   14.80    1.30
  22   0   2   17.00    0.90
  24   0   2    0.50    0.70
 -24   0  -2    1.20    0.80
  24   0   2    1.00    0.70
  24   0   2    0.70    0.30
 -24   0  -2    0.00    0.60
  24   0   2   -0.30    0.60
  24   0   2    0.50    0.30
 -24   0  -2   -0.60    0.70
  24   0   2   -0.90    0.70
  24   0   2   -0.40    0.50
 -24   0  -2    0.20    0.50
 -26   0  -2   -0.40    0.70
  26   0   2    0.70    0.60
  26   0   2    1.30    0.80
 -26   0  -2    0.80    0.80
  26   0   2   -0.30    0.70
  26   0   2    0.20    0.40
  26   0   2    0.70    0.40
 -26   0  -2    1.00    0.70
  26   0   2   -0.10    0.90
 -26   0  -2    1.20    0.80
  26   0   2    1.80    0.90
  28   0   2    6.70    1.20
  28   0   2    6.00    0.70
  28   0   2    6.70    0.70
 -28   0  -2    5.90    1.00
  28   0   2    5.80    1.10
 -28   0  -2    5.30    1.10
  28   0   2   10.00    1.40
  28   0   2    6.40    1.00
 -28   0  -2    6.70    1.10
 -28   0  -2    5.40    1.20
 -30   0  -2    1.60    1.10
  30   0   2    2.70    1.00
  30   0   2    2.20    0.50
  30   0   2    1.20    1.20
 -30   0  -2    1.40    0.90
  30   0   2    1.30    1.00
 -30   0  -2    1.70    1.00
  30   0   2    2.30    0.50
 -30   0  -2    2.00    0.90
  32   0   2   -0.30    1.10
  32   0   2    2.20    0.60
 -32   0  -2    2.30    1.00
  32   0   2    1.30    1.10
 -32   0  -2    1.50    1.00
  32   0   2    3.50    1.20
  32   0   2    1.30    0.60
  33  -1  -2    0.10    1.00
  33  -1  -2    0.10    0.90
 -33  -1   2    0.10    1.10
  33  -1  -2   -0.30    0.50
  33  -1  -2    0.60    1.00
 -33  -1   2    1.40    1.00
 -33  -1   2    2.70    1.10
  33  -1  -2    0.90    0.60
  33   1  -2   -0.20    0.60
  33   1  -2   -0.90    0.90
  33   1  -2    1.70    1.20
  33   1  -2   -1.60    1.00
 -33   1   2    0.50    0.90
  33   1  -2    1.00    0.60
 -33   1   2    0.60    1.00
 -33   1   2    0.00    0.80
 -31  -1   2    4.50    1.30
 -31  -1   2    5.60    1.10
  31  -1  -2    4.30    1.30
 -31  -1   2    3.20    1.20
  31  -1  -2    4.00    1.10
 -31  -1   2    7.10    1.20
  31  -1  -2    5.80    0.80
  31  -1  -2    4.70    1.20
  31  -1  -2    3.80    0.70
  31   1  -2    4.50    0.80
  31   1  -2    5.20    1.30
 -31   1   2    3.90    1.10
 -31   1   2    5.30    1.20
  31   1  -2    4.70    1.30
 -31   1   2    4.10    1.10
  31   1  -2    5.70    0.80
  31   1  -2    4.70    1.30
 -29  -1   2    5.20    1.00
  29  -1  -2    4.80    0.70
  29  -1  -2    5.70    1.30
 -29  -1   2    3.50    0.90
  29  -1  -2    3.90    1.20
 -29  -1   2    5.00    1.10
  29  -1  -2    5.80    0.70
  29  -1  -2    4.90    1.10
  29   1  -2    7.00    1.30
  29   1  -2    4.60    0.70
 -29   1   2    4.10    1.10
  29   1  -2    6.90    1.10
 -29   1   2    4.50    1.10
  29   1  -2    4.40    1.10
  29   1  -2    4.70    0.70
 -29   1   2    5.50    1.10
  29   1  -2    5.20    1.20
  27  -1  -2    2.00    1.00
  27  -1  -2    1.60    1.00
 -27  -1   2    2.20    0.70
  27  -1  -2    0.60    0.80
 -27  -1   2    1.10    0.70
  27  -1  -2    1.80    0.50
 -27  -1   2    0.80    0.80
  27  -1  -2    1.80    0.50
  27   1  -2    1.40    0.30
  27   1  -2    2.10    0.60
  27   1  -2    2.00    0.90
  27   1  -2    3.10    0.80
  27   1  -2    1.70    0.30
  27   1  -2    1.40    0.80
  27   1  -2    1.60    0.90
 -27   1   2    1.80    0.90
 -27   1   2    1.50    0.90
  27   1  -2    2.20    0.60
 -27   1   2   -0.30    0.80
  25  -1  -2    3.70    0.60
  25  -1  -2    3.70    0.90
 -25  -1   2    3.40    0.80
  25  -1  -2    5.10    0.80
 -25  -1   2    3.60    0.90
  25  -1  -2    4.20    0.60
  25  -1  -2    4.90    1.00
  25  -1  -2    6.40    1.00
 -25  -1   2    4.50    1.10
  25   1  -2    5.00    1.00
  25   1  -2    4.60    0.50
  25   1  -2    5.70    1.00
  25   1  -2    4.30    0.60
 -25   1   2    5.00    1.00
  25   1  -2    4.30    0.60
  25   1  -2    5.10    0.90
  25   1  -2    4.50    0.50
 -25   1   2    4.40    1.00
  25   1  -2    5.90    1.00
 -25   1   2    4.10    0.90
  25   1  -2    5.80    0.80
  23  -1  -2   19.60    1.40
 -23  -1   2   17.00    1.30
  23  -1  -2   18.80    1.30
 -23  -1   2   16.90    1.40
  23  -1  -2   19.30    1.00
  23  -1  -2   20.70    1.10
  23  -1  -2   19.20    1.00
  23  -1  -2   17.30    1.50
  23  -1  -2   17.80    1.40
  23  -1  -2   20.30    1.10
 -23  -1   2   17.80    1.30
  23   1  -2   17.10    1.00
 -23   1   2   16.40    1.40
 -23   1   2   15.80    1.40
  23   1  -2   17.20    1.50
  23   1  -2   18.60    1.10
  23   1  -2   20.40    1.20
  23   1  -2   21.10    1.00
  23   1  -2   19.20    1.40
  23   1  -2   19.20    1.10
  23   1  -2   18.10    1.50
 -23   1   2   18.40    1.50
  23   1  -2   19.30    1.50
  21  -1  -2    2.80    0.30
  21  -1  -2    1.90    0.40
  21  -1  -2    2.20    0.70
 -21  -1   2    1.70    0.60
  21  -1  -2    2.20    0.70
 -21  -1   2    2.50    0.60
  21  -1  -2    1.70    0.50
  21  -1  -2    2.00    0.40
  21  -1  -2    2.20    0.60
  21  -1  -2    2.00    0.40
  21  -1  -2    2.20    0.30
  21  -1  -2    1.90    0.40
 -21  -1   2    3.10    0.70
  21  -1  -2    1.90    0.70
  21   1  -2    2.20    0.50
  21   1  -2    2.20    0.40
  21   1  -2    2.10    0.40
  21   1  -2    2.40    0.40
  21   1  -2    2.60    0.70
  21   1  -2    3.00    0.80
 -21   1   2    3.40    0.70
 -21   1   2    2.30    0.70
  21   1  -2    1.20    0.40
  21   1  -2    2.00    0.40
  21   1  -2    2.20    0.40
  21   1  -2    2.60    0.70
  21   1  -2    2.30    0.80
 -19  -1   2   59.19    2.60
  19  -1  -2   60.69    2.60
 -19  -1   2   57.19    2.70
 -19  -1   2   56.79    2.50
  19  -1  -2   61.19    2.70
  19  -1  -2   55.69    2.20
  19  -1  -2   56.99    2.20
  19  -1  -2   57.49    2.20
  19  -1  -2   55.99    2.60
  19  -1  -2   59.79    2.50
  19  -1  -2   61.19    2.20
  19  -1  -2   57.69    2.30
  19   1  -2   60.59    2.40
  19   1  -2   59.09    2.30
  19   1  -2   61.69    2.30
 -19   1   2   55.19    2.60
 -19   1   2   57.29    2.50
  19   1  -2   62.89    2.70
  19   1  -2   60.59    2.70
  19   1  -2   66.29    2.40
  19   1  -2   58.39    2.30
  19   1  -2   59.19    2.60
  19   1  -2   58.59    2.40
  19   1  -2   63.89    2.40
  19   1  -2   62.39    2.60
  17  -1  -2    0.80    0.50
  17  -1  -2    0.20    0.20
  17  -1  -2    0.40    0.30
  17  -1  -2    0.80    0.30
  17  -1  -2    1.10    0.30
  17  -1  -2    0.70    0.20
  17  -1  -2    0.50    0.40
  17  -1  -2    0.70    0.50
  17  -1  -2    1.00    0.40
 -17  -1   2    0.10    0.40
 -17  -1   2    1.30    0.60
 -17  -1   2    0.60    0.50
  17  -1  -2    0.30    0.20
  17  -1  -2    0.60    0.30
 -17   1   2    0.30    0.40
  17   1  -2    1.00    0.30
  17   1  -2    1.20    0.50
 -17   1   2    0.60    0.50
  17   1  -2    0.10    0.40
  17   1  -2    0.90    0.30
  17   1  -2    0.70    0.30
  17   1  -2    0.50    0.30
  17   1  -2    0.30    0.30
  17   1  -2    0.10    0.20
  17   1  -2    1.70    0.50
  17   1  -2    0.80    0.30
  17   1  -2    0.70    0.50
  15  -1  -2  130.89    4.30
 -15  -1   2  122.99    4.40
  15  -1  -2  126.79    4.30
  15  -1  -2  114.79    4.30
  15  -1  -2  112.69    4.20
 -15  -1   2  122.49    4.50
  15  -1  -2  111.39    4.50
  15  -1  -2  119.79    4.70
  15  -1  -2  122.39    4.20
  15  -1  -2  117.09    4.50
 -15  -1   2  113.99    4.60
  15  -1  -2  122.19    4.20
  15   1  -2  112.69    4.30
  15   1  -2  123.09    4.30
  15   1  -2  115.29    4.30
  15   1  -2  115.49    4.50
 -15   1   2  109.89    4.40
  15   1  -2  130.39    4.40
  15   1  -2  118.49    4.50
  15   1  -2  130.59    4.30
  15   1  -2  110.59    4.60
  15   1  -2  120.19    4.30
 -15   1   2  115.89    4.50
  15   1  -2  118.39    4.60
  13  -1  -2    2.40    0.30
 -13  -1   2    2.10    0.50
  13  -1  -2    2.10    0.50
  13  -1  -2    2.20    0.60
  13  -1  -2    2.30    0.30
  13  -1  -2    2.20    0.30
  13  -1  -2    1.70    0.40
 -13  -1   2    2.00    0.40
 -13  -1   2    3.20    0.50
  13  -1  -2    3.50    0.50
  13  -1  -2    2.10    0.30
  13  -1  -2    3.00    0.30
  13  -1  -2    2.60    0.40
  13  -1  -2    1.90    0.30
  13  -1  -2    2.50    0.30
  13   1  -2    2.20    0.30
  13   1  -2    1.40    0.30
  13   1  -2    2.10    0.40
  13   1  -2    2.20    0.40
  13   1  -2    1.20    0.40
  13   1  -2    1.80    0.40
  13   1  -2    2.30    0.30
  13   1  -2    2.20    0.50
  13   1  -2    2.10    0.30
 -13   1   2    1.60    0.50
 -13   1   2    1.80    0.50
  13   1  -2    2.40    0.50
  13   1  -2    2.30    0.30
  13   1  -2    2.20    0.30
  11  -1  -2   87.09    3.40
 -11  -1   2   92.29    3.30
  11  -1  -2   74.09    3.10
 -11  -1   2   90.59    3.30
  11  -1  -2   93.19    3.20
  11  -1  -2   88.79    3.30
 -11  -1   2   86.89    3.40
  11  -1  -2   95.09    3.20
  11  -1  -2   91.29    3.10
  11  -1  -2   91.79    3.20
  11  -1  -2   88.29    3.20
  11  -1  -2   88.39    3.20
  11  -1  -2   91.29    3.40
  11  -1  -2   92.59    3.30
  11   1  -2   84.09    3.40
 -11   1   2   89.89    3.40
 -11   1   2   90.39    3.30
  11   1  -2   91.89    3.20
  11   1  -2   97.59    3.30
  11   1  -2   92.99    3.30
  11   1  -2   87.19    3.20
  11   1  -2   83.09    3.40
  11   1  -2   77.39    3.20
  11   1  -2   87.69    3.20
   9  -1  -2  984.50   33.40
   9  -1  -2  978.00   32.40
  -9  -1   2 1019.10   32.80
   9  -1  -2  937.11   33.00
  -9  -1   2  964.40   34.00
   9  -1  -2  973.50   34.20
   9  -1  -2  974.20   33.30
  -9  -1   2  944.71   33.60
   9  -1  -2 1008.40   33.70
   9   1  -2  941.91   32.30
  -9   1   2  962.70   32.80
   9   1  -2 1000.00   33.30
   9   1  -2  985.90   32.30
  -9   1   2  994.40   33.70
   9   1  -2  936.21   34.30
   7  -1  -2  622.34   23.70
   7  -1  -2  672.43   23.20
   7  -1  -2  707.93   23.40
  -7  -1   2  705.33   23.10
   7  -1  -2  699.33   24.10
   7  -1  -2  711.43   23.50
   7  -1  -2  682.43   22.80
   7  -1  -2  710.93   23.70
   7  -1  -2  658.43   23.50
  -7  -1   2  695.13   23.70
   7  -1  -2  667.83   23.70
   7   1  -2  674.03   22.80
   7   1  -2  650.83   23.50
  -7   1   2  711.83   23.70
  -7   1   2  699.93   23.10
   7   1  -2  654.23   23.30
   7   1  -2  683.03   24.20
   7   1  -2  709.73   22.80
   7   1  -2  696.43   23.50
  -5  -1   2  272.77    9.10
  -5  -1   2  276.97    9.30
   5  -1  -2  274.67    9.20
   5  -1  -2  275.17    9.20
   5   1  -2  269.17    9.20
   5   1  -2  274.07    9.20
   5   1  -2  274.57    9.50
   5   1  -2  274.37    9.30
  -5   1   2  226.38    9.30
   5   1  -2  270.37    9.20
   5   1  -2  244.48    9.40
   5   1  -2  276.37    9.20
   5   1  -2  267.37    9.20
  -3  -1   2   21.60    0.80
   3  -1  -2   21.90    0.90
   3  -1  -2   21.50    0.90
   3  -1  -2   21.60    0.80
   3  -1  -2   22.20    0.90
  -3  -1   2   22.40    0.90
  -3  -1   2   21.00    0.90
  -3  -1   2   21.70    0.90
   3  -1  -2   20.80    0.90
   3  -1  -2   20.50    0.90
   3  -1  -2   21.90    0.90
   3   1  -2   20.80    0.90
   3   1  -2   23.00    0.80
   3   1  -2   21.10    0.80
   3   1  -2   21.90    0.90
   3   1  -2   21.90    0.90
   3   1  -2   21.90    0.90
   3   1  -2   21.60    0.90
  -1  -1   2  674.23   23.50
  -1  -1   2  711.03   23.30
  -1  -1   2  717.93   23.60
  -1  -1   2  696.73   24.00
   1  -1  -2  677.53   23.80
  -1  -1   2  675.83   23.80
   1  -1  -2  698.93   23.50
   1   1  -2  688.43   23.80
   1   1  -2  693.43   23.50
  -1   1   2  711.13   23.40
  -1   1   2  682.93   23.80
   1  -1   2   10.70    0.50
  -1  -1  -2   11.50    0.50
  -1  -1  -2   11.10    0.50
   1  -1   2   11.20    0.50
  -1  -1  -2   10.50    0.50
   1   1   2   10.80    0.50
   1   1   2   10.50    0.50
   1   1   2   11.20    0.50
   1   1   2   10.60    0.50
   1   1   2   10.30    0.50
  -3  -1  -2  311.47   10.00
   3  -1   2  296.17   10.60
   3  -1   2  298.17   10.10
   3  -1   2  306.37   10.20
   3  -1   2  299.47   10.20
   3  -1   2  293.87   10.40
  -3  -1  -2  300.67   10.20
  -3  -1  -2  303.57   10.50
   3  -1   2  299.47   10.50
   3  -1   2  308.77   10.20
   3  -1   2  281.07   10.20
   3   1   2  298.67   10.00
   3   1   2  295.67   10.30
  -5  -1  -2   27.30    1.20
   5  -1   2   27.20    1.20
   5  -1   2   29.10    1.10
   5  -1   2   27.20    1.10
  -5  -1  -2   27.40    1.00
   5  -1   2   27.20    1.20
   5  -1   2   28.90    1.00
  -5  -1  -2   28.20    1.10
   5  -1   2   28.60    1.20
   5  -1   2   27.60    1.10
  -5  -1  -2   28.50    1.20
   5   1   2   28.40    1.10
   5   1   2   27.30    1.10
   5   1   2   27.80    1.10
   5   1   2   26.50    1.20
   5   1   2   27.00    1.10
   5   1   2   26.70    1.10
   5   1   2   27.20    1.00
   5   1   2   28.40    1.00
   5   1   2   27.60    1.20
   7  -1   2  310.37   10.80
  -7  -1  -2  307.27   10.60
  -7  -1  -2  314.47   10.40
  -7  -1  -2  293.27   10.90
   7  -1   2  299.67   10.60
   7  -1   2  307.37   10.90
   7  -1   2  302.97   10.40
   7  -1   2  304.27   11.00
   7  -1   2  302.07   10.60
  -7  -1  -2  311.07   10.70
   7   1   2  304.77   10.90
   7   1   2  310.77   10.60
   7   1   2  321.07   10.60
   7   1   2  307.47   11.00
   7   1   2  320.37   10.70
   7   1   2  310.37   10.60
   7   1   2  304.97   10.70
   7   1   2  298.57   10.40
   7   1   2  312.77   10.60
   9  -1   2  230.48    7.80
  -9  -1  -2  228.98    8.00
   9  -1   2  202.88    8.10
  -9  -1  -2  231.38    8.10
   9  -1   2  235.08    8.30
  -9  -1  -2  225.58    8.20
   9  -1   2  225.88    8.00
  -9  -1  -2  226.08    7.80
   9   1   2  238.18    7.90
   9   1   2  227.38    7.80
   9   1   2  231.48    8.00
   9   1   2  239.08    7.90
 -11  -1  -2   40.50    1.70
 -11  -1  -2   39.10    1.60
  11  -1   2   42.40    1.60
 -11  -1  -2   39.00    1.80
  11  -1   2   39.90    1.70
  11  -1   2   39.50    1.80
  11  -1   2   38.30    1.80
  11  -1   2   36.50    1.70
  11  -1   2   40.80    1.80
  11   1   2   42.50    1.50
  11   1   2   41.20    1.80
  11   1   2   43.60    1.60
  11   1   2   39.60    1.80
  11   1   2   40.20    1.50
  11   1   2   40.90    1.50
  11   1   2   43.50    1.50
  11   1   2   38.30    1.50
  11   1   2   38.30    1.80
 -11   1  -2   40.50    1.70
  11   1   2   39.00    1.80
  13  -1   2   79.19    3.50
  13  -1   2   87.89    3.40
 -13  -1  -2   89.99    3.30
 -13  -1  -2   85.39    3.50
  13  -1   2   85.19    3.40
 -13  -1  -2   87.39    3.20
  13  -1   2   74.59    3.40
  13  -1   2   88.89    3.40
  13   1   2   88.69    3.20
  13   1   2   87.39    3.40
  13   1   2   85.49    3.10
  13   1   2   97.09    3.20
  13   1   2   89.99    3.10
  13   1   2   89.79    3.30
  13   1   2   89.09    3.10
  13   1   2   88.79    3.50
  13   1   2   88.69    3.50
  13   1   2   88.39    3.40
 -13   1  -2   90.89    3.30
  13   1   2   88.49    3.10
  15  -1   2   48.40    2.10
  15  -1   2   50.59    2.20
  15  -1   2   49.10    2.00
  15  -1   2   50.19    2.10
 -15  -1  -2   47.10    2.00
  15  -1   2   53.19    2.20
 -15  -1  -2   47.10    2.20
 -15  -1  -2   48.60    2.00
  15  -1   2   47.40    2.10
  15   1   2   50.29    1.80
  15   1   2   48.10    2.00
 -15   1  -2   47.00    2.10
  15   1   2   46.20    1.80
  15   1   2   47.70    2.20
  15   1   2   49.10    1.80
  15   1   2   50.29    2.20
  15   1   2   46.80    2.10
  15   1   2   47.90    2.20
  15   1   2   46.50    1.90
  15   1   2   45.50    1.80
 -17  -1  -2   22.30    1.30
  17  -1   2   25.70    1.40
  17  -1   2   23.10    1.40
  17  -1   2   27.20    1.00
  17  -1   2   22.70    1.20
  17  -1   2   23.30    0.90
  17  -1   2   23.30    1.30
  17  -1   2   25.50    1.40
  17  -1   2   24.90    1.50
 -17  -1  -2   24.20    1.30
 -17  -1  -2   24.00    1.50
  17   1   2   23.60    1.10
  17   1   2   23.60    1.40
  17   1   2   19.90    1.00
  17   1   2   24.70    1.00
  17   1   2   24.50    1.40
 -17   1  -2   23.30    1.40
  17   1   2   24.60    1.30
  17   1   2   23.70    1.00
  17   1   2   23.80    1.00
 -17   1  -2   23.90    1.30
  17   1   2   26.50    1.50
  17   1   2   26.00    1.50
 -19  -1  -2   20.20    1.20
 -19  -1  -2   19.60    1.40
  19  -1   2   18.80    1.30
  19  -1   2   23.20    1.40
  19  -1   2   19.00    1.20
  19  -1   2   18.40    0.80
 -19  -1  -2   19.60    1.40
  19  -1   2   21.50    1.40
  19  -1   2   22.40    1.30
  19  -1   2   19.20    1.30
  19  -1   2   18.70    0.80
 -19  -1  -2   19.80    1.20
  19  -1   2   22.70    0.90
  19   1   2   21.70    1.20
  19   1   2   20.20    1.30
  19   1   2   21.60    1.50
  19   1   2   21.90    0.90
  19   1   2   17.90    1.30
 -19   1  -2   18.20    1.20
  19   1   2   22.90    1.00
  19   1   2   19.40    1.00
  19   1   2   21.20    1.40
  19   1   2   19.10    0.80
  19   1   2   22.80    1.00
  19   1   2   19.80    0.90
 -19   1  -2   21.70    1.30
  21  -1   2    0.30    0.50
  21  -1   2   -0.10    0.20
  21  -1   2    0.70    0.60
 -21  -1  -2    0.50    0.70
  21  -1   2   -0.10    0.60
  21  -1   2    0.30    0.30
  21  -1   2    0.20    0.50
  21  -1   2   -0.90    0.60
  21  -1   2    0.10    0.20
  21  -1   2    0.10    0.20
 -21  -1  -2    0.40    0.50
 -21  -1  -2   -1.00    0.50
 -21  -1  -2    0.40    0.70
  21   1   2   -0.40    0.60
 -21   1  -2    0.00    0.60
  21   1   2   -0.20    0.30
 -21   1  -2   -0.10    0.60
 -21   1  -2    0.40    0.60
  21   1   2    0.20    0.30
  21   1   2   -0.10    0.40
  21   1   2    0.10    0.60
  21   1   2   -1.20    0.60
  21   1   2    0.40    0.30
  21   1   2   -0.30    0.30
  21   1   2   -0.10    0.60
  21   1   2    0.40    0.20
  23  -1   2    1.60    0.30
  23  -1   2    0.80    0.60
  23  -1   2    1.10    0.70
  23  -1   2    1.50    0.30
 -23  -1  -2    1.90    0.70
  23  -1   2    1.30    0.30
  23  -1   2    1.30    0.60
 -23  -1  -2    0.80    0.70
  23  -1   2    1.60    0.30
  23  -1   2    2.20    0.70
  23  -1   2    2.70    0.90
 -23  -1  -2    1.20    0.80
 -23  -1  -2    1.50    0.70
  23   1   2    3.40    0.90
  23   1   2    1.00    0.50
  23   1   2    1.50    0.70
 -23   1  -2    1.10    0.80
  23   1   2    1.30    0.60
  23   1   2    1.30    0.40
 -23   1  -2    0.80    0.60
 -23   1  -2    1.40    0.70
  23   1   2    0.60    0.80
  23   1   2    1.30    0.40
  25  -1   2   -0.10    0.30
 -25  -1  -2   -0.70    0.60
 -25  -1  -2    0.00    0.70
  25  -1   2    0.00    0.70
  25  -1   2    0.00    0.30
 -25  -1  -2   -0.90    0.70
  25  -1   2    0.20    0.50
 -25  -1  -2   -0.80    0.60
  25  -1   2    0.70    0.70
  25  -1   2    0.60    0.80
  25  -1   2    0.20    0.70
  25   1   2   -0.20    0.40
 -25   1  -2   -0.50    0.60
  25   1   2    1.10    0.80
  25   1   2   -0.10    0.40
 -25   1  -2    0.10    0.60
  25   1   2   -0.70    0.50
  25   1   2   -0.20    0.80
 -25   1  -2   -0.40    0.70
  25   1   2    0.20    0.70
  25   1   2    0.40    0.70
  27  -1   2   34.40    2.20
  27  -1   2   34.80    2.00
 -27  -1  -2   31.00    2.30
 -27  -1  -2   34.20    2.00
  27  -1   2   34.40    2.10
 -27  -1  -2   36.60    2.30
 -27  -1  -2   35.00    2.00
  27  -1   2   33.20    2.20
  27  -1   2   33.40    1.50
  27  -1   2   32.90    1.50
  27   1   2   33.80    1.60
  27   1   2   35.30    2.10
  27   1   2   34.40    2.20
 -27   1  -2   32.00    2.20
 -27   1  -2   35.30    2.00
  27   1   2   35.90    1.60
  27   1   2   38.30    2.40
  27   1   2   36.70    2.30
 -27   1  -2   34.00    2.10
  29  -1   2    4.00    0.60
 -29  -1  -2    2.80    0.90
  29  -1   2    5.60    1.10
 -29  -1  -2    3.00    1.10
 -29  -1  -2    2.60    1.10
  29  -1   2    3.40    0.50
  29  -1   2    4.90    1.20
  29  -1   2    7.50    1.30
  29   1   2    3.30    1.00
 -29   1  -2    3.60    1.00
  29   1   2    5.40    1.10
  29   1   2    2.80    0.60
  29   1   2    4.00    1.10
 -29   1  -2    4.80    1.10
 -29   1  -2    3.90    1.00
  29   1   2    5.10    1.10
 -29   1  -2    5.10    1.00
  29   1   2    4.40    0.70
 -31  -1  -2    0.00    0.90
  31  -1   2    0.00    0.50
  31  -1   2    0.40    1.00
  31  -1   2   -0.60    0.80
  31  -1   2    0.20    0.40
 -31  -1  -2   -1.20    0.90
  31  -1   2    1.10    1.10
  31   1   2    1.30    0.90
  31   1   2    0.20    0.50
 -31   1  -2    0.70    0.80
 -31   1  -2    2.00    1.00
  31   1   2   -0.40    0.50
 -31   1  -2    0.40    1.10
  31   1   2   -0.80    1.10
 -31   1  -2    0.40    0.90
  31   1   2   -0.20    0.80
  31   1   2   -0.40    1.00
 -33  -1  -2    7.60    1.60
 -33  -1  -2    3.10    1.20
  33  -1   2    4.00    1.40
  33  -1   2    6.00    1.30
  33  -1   2    5.70    0.70
  33  -1   2    6.00    0.70
  33  -1   2    5.90    1.40
 -33   1  -2    5.10    1.30
 -33   1  -2    3.90    1.20
  33   1   2    5.70    0.80
  33   1   2    6.90    1.60
 -33   1  -2    7.00    1.40
  33   1   2    5.10    0.80
  33   1   2    6.70    1.60
  33   1   2    3.80    1.30
  34  -2  -2    1.30    0.70
 -34  -2   2    0.00    1.00
  34  -2  -2    0.80    0.60
  34  -2  -2   -0.80    1.00
 -34  -2   2   -1.90    1.10
  34  -2  -2    1.30    1.10
  34  -2  -2    0.20    1.10
 -34   2   2    0.30    1.00
  34   2  -2    1.00    1.30
 -34   2   2    1.20    1.10
  34   2  -2    0.70    1.10
  34   2  -2    1.90    0.80
  34   2  -2    0.70    1.10
  34   2  -2    0.40    0.70
 -34   2   2    0.30    1.10
  32  -2  -2    2.10    1.10
 -32  -2   2   -0.20    1.00
  32  -2  -2    0.60    0.50
  32  -2  -2   -0.10    0.60
  32  -2  -2   -0.80    1.10
 -32  -2   2    0.10    1.10
  32  -2  -2   -0.20    1.00
  32   2  -2    1.10    0.90
  32   2  -2    0.60    1.00
 -32   2   2   -0.60    0.90
 -32   2   2    0.50    1.10
  32   2  -2   -0.20    0.60
 -32   2   2    0.70    0.80
  32   2  -2   -1.20    0.90
  32   2  -2    0.50    0.70
  32   2  -2    0.50    1.10
  30  -2  -2    2.80    0.60
 -30  -2   2    4.10    1.10
 -30  -2   2    5.40    1.30
  30  -2  -2    4.60    1.10
  30  -2  -2    2.30    1.00
 -30  -2   2    3.90    1.00
  30  -2  -2    5.30    0.70
  30  -2  -2    3.80    1.10
  30   2  -2    4.60    0.80
  30   2  -2    4.60    1.10
  30   2  -2    2.90    1.20
 -30   2   2    2.50    1.10
 -30   2   2    3.90    1.10
  30   2  -2    5.10    1.10
  30   2  -2    3.40    0.40
  30   2  -2    4.90    1.10
 -30   2   2    4.20    1.10
  30   2  -2    3.20    0.40
  30   2  -2    3.90    0.70
  28  -2  -2    4.90    1.20
  28  -2  -2    7.50    1.30
 -28  -2   2    4.70    1.20
  28  -2  -2    5.20    0.70
 -28  -2   2    3.50    1.00
  28  -2  -2    5.70    1.10
 -28  -2   2    4.30    0.90
  28  -2  -2    4.10    0.60
 -28  -2   2    3.90    1.20
 -28   2   2    4.30    1.00
 -28   2   2    6.20    1.10
  28   2  -2    3.60    0.70
  28   2  -2    6.00    1.30
  28   2  -2    4.20    1.00
  28   2  -2    6.10    1.30
  28   2  -2    4.30    0.70
  28   2  -2    5.50    0.60
  28   2  -2    5.00    1.10
 -28   2   2    4.50    1.00
 -26  -2   2    9.10    1.30
 -26  -2   2   11.10    1.40
 -26  -2   2   10.00    1.10
  26  -2  -2   10.40    1.30
  26  -2  -2   10.50    0.80
  26  -2  -2   11.20    0.80
  26  -2  -2   10.90    1.40
  26  -2  -2    9.50    1.20
 -26  -2   2   11.20    1.20
  26   2  -2    8.60    1.30
  26   2  -2   11.00    1.30
 -26   2   2    9.70    1.30
  26   2  -2    9.60    0.90
  26   2  -2   11.20    1.40
  26   2  -2    9.40    0.80
  26   2  -2   12.10    1.30
  26   2  -2   10.20    0.90
  26   2  -2   10.30    0.80
 -26   2   2    7.50    1.10
 -24  -2   2    6.30    0.90
 -24  -2   2    4.80    1.00
  24  -2  -2    5.90    0.70
  24  -2  -2    6.40    1.00
  24  -2  -2    5.50    1.00
 -24  -2   2    5.20    0.90
  24  -2  -2    6.00    0.60
  24  -2  -2    5.20    0.60
  24  -2  -2    5.80    1.00
  24   2  -2    5.10    0.60
  24   2  -2    4.90    0.70
  24   2  -2    6.00    0.80
  24   2  -2    6.40    1.00
  24   2  -2    6.40    1.00
 -24   2   2    4.70    1.10
  24   2  -2    5.30    0.70
 -24   2   2    4.70    0.90
  24   2  -2    7.80    1.00
  24   2  -2    5.30    0.60
  24   2  -2    5.80    1.10
 -22  -2   2   40.80    2.40
  22  -2  -2   49.00    1.90
 -22  -2   2   44.40    2.10
  22  -2  -2   34.40    2.20
  22  -2  -2   48.00    2.10
  22  -2  -2   44.50    1.80
  22  -2  -2   49.70    1.90
  22  -2  -2   41.30    1.80
  22  -2  -2   45.90    2.30
 -22  -2   2   43.30    2.10
  22  -2  -2   47.90    1.90
  22  -2  -2   44.80    2.30
  22   2  -2   48.10    1.90
  22   2  -2   44.80    2.00
  22   2  -2   43.20    2.40
  22   2  -2   46.90    2.30
  22   2  -2   43.70    1.90
  22   2  -2   49.00    2.10
 -22   2   2   43.80    2.20
  22   2  -2   47.50    2.00
  22   2  -2   46.70    2.30
  22   2  -2   43.90    2.20
 -22   2   2   41.40    2.20
  20  -2  -2    0.30    0.30
  20  -2  -2   -0.30    0.30
  20  -2  -2   -0.20    0.50
  20  -2  -2    0.30    0.20
 -20  -2   2    0.40    0.60
  20  -2  -2    0.50    0.30
  20  -2  -2   -0.10    0.20
 -20  -2   2   -0.70    0.40
  20  -2  -2   -0.30    0.30
  20  -2  -2    0.70    0.40
  20  -2  -2   -0.90    0.30
  20  -2  -2    0.50    0.50
 -20  -2   2   -0.30    0.50
  20  -2  -2   -0.20    0.50
  20   2  -2    0.00    0.30
  20   2  -2    0.30    0.50
  20   2  -2    0.20    0.60
  20   2  -2    0.10    0.40
  20   2  -2    0.30    0.60
  20   2  -2    0.50    0.50
  20   2  -2    0.30    0.30
  20   2  -2   -0.20    0.40
  20   2  -2    0.00    0.30
 -20   2   2    0.00    0.60
  20   2  -2    0.30    0.40
  20   2  -2   -0.10    0.40
 -20   2   2    0.10    0.50
  18  -2  -2    5.80    0.60
 -18  -2   2    8.20    0.90
  18  -2  -2    9.80    0.90
  18  -2  -2    9.50    0.50
  18  -2  -2    9.70    0.90
  18  -2  -2    8.00    0.60
  18  -2  -2   10.60    0.60
  18  -2  -2    9.20    1.00
 -18  -2   2    9.40    0.80
 -18  -2   2    8.70    0.80
  18  -2  -2   10.10    1.00
  18  -2  -2    8.80    0.60
  18   2  -2    9.00    0.80
  18   2  -2   10.30    0.70
  18   2  -2   10.80    0.80
  18   2  -2   10.60    0.80
  18   2  -2    8.30    0.70
  18   2  -2    9.80    0.90
 -18   2   2    8.60    1.00
  18   2  -2    8.50    0.90
  18   2  -2   11.60    1.10
 -18   2   2    8.10    0.90
  16  -2  -2   31.40    1.20
  16  -2  -2   32.40    1.20
  16  -2  -2   27.30    1.20
  16  -2  -2   30.50    1.30
  16  -2  -2   27.90    1.50
  16  -2  -2   30.40    1.60
  16  -2  -2   30.00    1.60
  16  -2  -2   27.90    1.20
 -16  -2   2   28.20    1.60
  16  -2  -2   32.30    1.30
 -16  -2   2   27.10    1.40
 -16  -2   2   28.70    1.40
  16  -2  -2   28.40    1.50
  16  -2  -2   28.10    1.20
  16  -2  -2   28.80    1.20
  16   2  -2   29.90    1.40
  16   2  -2   29.00    1.40
  16   2  -2   30.40    1.30
 -16   2   2   25.60    1.60
 -16   2   2   27.80    1.50
  16   2  -2   23.00    1.20
  16   2  -2   28.20    1.30
  16   2  -2   30.20    1.60
  16   2  -2   32.20    1.40
  16   2  -2   28.40    1.50
  16   2  -2   29.60    1.60
 -14  -2   2    2.60    0.50
  14  -2  -2    1.80    0.30
  14  -2  -2    2.10    0.60
  14  -2  -2    2.10    0.30
  14  -2  -2    1.90    0.30
  14  -2  -2    1.40    0.50
 -14  -2   2    1.90    0.50
  14  -2  -2    2.00    0.30
  14  -2  -2    1.70    0.30
  14  -2  -2    2.30    0.30
 -14  -2   2    1.90    0.40
  14  -2  -2    1.80    0.50
  14  -2  -2    1.50    0.30
  14  -2  -2    1.80    0.50
  14   2  -2    1.50    0.40
  14   2  -2    1.90    0.40
  14   2  -2    2.30    0.40
 -14   2   2    2.30    0.50
 -14   2   2    2.70    0.60
  14   2  -2    1.90    0.50
  14   2  -2    1.80    0.40
  14   2  -2    1.60    0.50
  14   2  -2    1.30    0.30
  14   2  -2    2.40    0.60
 -12  -2   2  185.88    6.40
  12  -2  -2  185.78    6.60
  12  -2  -2  188.68    6.80
  12  -2  -2  190.88    6.50
  12  -2  -2  188.08    6.40
 -12  -2   2  176.68    6.70
  12  -2  -2  187.08    6.70
  12  -2  -2  187.98    6.40
  12  -2  -2  178.38    6.50
  12  -2  -2  186.48    6.40
  12  -2  -2  174.18    6.40
  12  -2  -2  173.58    6.50
 -12  -2   2  187.18    6.60
  12  -2  -2  164.88    6.40
  12   2  -2  177.98    6.60
  12   2  -2  184.88    6.80
  12   2  -2  193.98    6.50
  12   2  -2  174.48    6.10
  12   2  -2  193.28    6.10
  12   2  -2  162.18    6.50
  12   2  -2  188.68    6.80
 -12   2   2  185.38    6.50
  10  -2  -2  309.97   10.70
  10  -2  -2  288.17   10.50
  10  -2  -2  277.57   10.40
  10  -2  -2  302.07   10.70
  10  -2  -2  288.07   10.70
 -10  -2   2  300.67   10.30
 -10  -2   2  302.87   10.60
  10  -2  -2  316.67   10.40
  10  -2  -2  305.47   10.50
  10  -2  -2  311.07   10.40
 -10  -2   2  296.07   10.80
  10  -2  -2  317.07   10.50
  10  -2  -2  273.57   10.40
  10   2  -2  321.27   10.10
  10   2  -2  287.07   10.50
  10   2  -2  300.77   10.60
  10   2  -2  310.27   10.50
  10   2  -2  295.57   10.50
 -10   2   2  306.17   10.40
   8   2  -2  107.49    3.90
  -6  -2   2  544.45   18.40
   6  -2  -2  536.15   18.10
  -6  -2   2  549.15   18.30
   6  -2  -2  559.64   18.20
   6  -2  -2  499.35   18.20
   6  -2  -2  560.14   17.70
  -6  -2   2  545.65   17.90
   6  -2  -2  466.05   18.40
   6  -2  -2  494.55   18.10
   6   2  -2  523.05   18.10
   6   2  -2  531.35   18.50
   6   2  -2  543.25   18.80
   6   2  -2  560.04   18.30
   6   2  -2  524.65   17.80
   6   2  -2  530.95   18.30
   4  -2  -2  540.55   19.40
   4  -2  -2  550.64   19.40
   4  -2  -2  535.15   19.60
   4  -2  -2  590.74   19.40
   4  -2  -2  585.34   19.60
  -4  -2   2  567.04   19.20
   4  -2  -2  568.24   19.10
  -4  -2   2  571.34   19.50
  -4  -2   2  562.74   19.20
  -4  -2   2  583.74   19.00
  -4  -2   2  560.44   19.40
   4   2  -2  559.14   19.60
   4   2  -2  553.44   19.40
   4   2  -2  561.84   18.90
   4   2  -2  581.54   19.40
   4   2  -2  559.84   19.10
   2  -2  -2  553.74   20.00
  -2  -2   2  570.94   19.50
   2  -2  -2  583.94   19.70
   2  -2  -2  527.65   19.80
  -2  -2   2  573.24   19.70
  -2  -2   2  559.04   20.00
   2  -2  -2  581.14   19.90
  -2  -2   2  584.64   20.00
  -2  -2   2  592.24   19.90
  -2  -2   2  576.14   19.50
  -2  -2   2  595.74   19.80
   2  -2  -2  584.64   20.10
  -2  -2   2  584.04   19.40
   2  -2  -2  578.34   19.50
  -2   2   2  594.84   20.20
   2   2  -2  561.64   19.80
  -2   2   2  565.54   19.70
   2   2  -2  571.44   19.70
   2   2  -2  586.24   19.20
   2   2  -2  579.14   19.50
   2   2  -2  583.24   20.30
   2   2  -2  568.34   20.00
   0  -2   2   19.90    0.70
   0  -2  -2   18.10    0.90
   0  -2   2   20.60    0.90
   0  -2  -2   19.70    0.90
   0  -2   2   19.40    0.90
   0  -2   2   20.60    0.90
   0  -2   2   19.20    0.90
   0  -2  -2   19.10    0.90
   0  -2   2   17.40    0.80
   0  -2  -2   19.20    0.80
   0  -2  -2   19.80    0.90
   0  -2  -2   20.30    0.90
   0  -2   2   19.60    0.90
   0  -2  -2   20.10    0.90
   0   2  -2   19.50    0.90
   0   2   2   19.20    0.90
   0   2   2   20.00    0.90
   0   2   2   19.90    0.90
   0   2   2   20.30    0.90
   0   2  -2   19.60    0.90
   0   2   2   19.90    0.90
  -2  -2  -2   32.30    1.30
   2  -2   2   31.10    1.30
   2  -2   2   32.30    1.10
   2  -2   2   29.90    1.20
   2  -2   2   30.10    1.30
   2  -2   2   31.20    1.20
   2  -2   2   26.50    1.20
   2  -2   2   31.20    1.20
   2  -2   2   30.10    1.20
  -2  -2  -2   31.40    1.30
  -2  -2  -2   31.60    1.30
  -2  -2  -2   30.50    1.20
   2   2   2   30.20    1.20
   2   2   2   31.50    1.30
   2   2   2   31.70    1.20
   2   2   2   30.40    1.20
   2   2   2   30.40    1.30
   4  -2   2  666.63   24.10
   4  -2   2  700.73   23.90
  -4  -2  -2  701.63   23.70
   4  -2   2  685.73   24.30
  -4  -2  -2  701.43   24.30
   4  -2   2  728.13   23.60
  -4  -2  -2  645.84   23.60
  -4  -2  -2  704.53   23.90
   4  -2   2  712.33   23.50
   4  -2   2  711.93   23.80
  -4  -2  -2  727.43   23.40
   4   2   2  706.43   24.20
   4   2   2  697.13   23.90
   4   2   2  669.93   23.90
   4   2   2  695.93   24.20
   4   2   2  701.23   23.90
   4   2   2  686.83   23.60
   6  -2   2  512.85   17.60
   6  -2   2  477.55   17.60
  -6  -2  -2  532.05   17.70
  -6  -2  -2  529.85   17.20
   6  -2   2  519.45   17.40
   6  -2   2  542.05   17.60
  -6  -2  -2  524.35   18.00
   6  -2   2  499.85   17.70
  -6  -2  -2  510.75   17.50
   6  -2   2  524.95   18.00
   6  -2   2  532.55   17.60
   6  -2   2  504.65   17.50
   6  -2   2  535.85   17.80
   6   2   2  540.25   17.70
   6   2   2  489.95   17.60
   6   2   2  445.36   17.50
   6   2   2  512.85   17.10
   6   2   2  533.35   17.10
   6   2   2  478.65   17.80
   8  -2   2   54.59    2.20
   8  -2   2   61.09    2.40
  -8  -2  -2   66.39    2.30
   8  -2   2   64.59    2.20
  -8  -2  -2   64.59    2.30
  -8  -2  -2   63.79    2.50
   8  -2   2   65.69    2.20
   8  -2   2   63.79    2.40
   8  -2   2   62.79    2.40
   8  -2   2   60.49    2.30
   8   2   2   65.89    2.10
   8   2   2   63.69    2.40
   8   2   2   60.39    2.10
   8   2   2   65.19    2.30
  10  -2   2   94.49    3.30
 -10  -2  -2   87.89    3.50
  10  -2   2   96.39    3.60
  10  -2   2   93.19    3.60
  10  -2   2   91.29    3.40
 -10  -2  -2   92.89    3.60
  10  -2   2   88.19    3.20
  10  -2   2   91.89    3.60
 -10  -2  -2  101.59    3.40
 -10  -2  -2   95.69    3.30
  10  -2   2   88.79    3.50
  10   2   2   99.79    3.40
  10   2   2   94.39    3.50
  10   2   2  100.89    3.50
  10   2   2   90.09    3.40
  10   2   2   93.99    3.40
  10   2   2   97.49    3.40
  10   2   2   87.49    3.60
  10   2   2   92.99    3.60
 -12  -2  -2  366.76   12.60
 -12  -2  -2  363.06   13.20
  12  -2   2  369.26   12.80
  12  -2   2  366.56   13.20
 -12  -2  -2  370.06   12.90
 -12  -2  -2  384.96   12.90
  12  -2   2  365.56   12.80
  12  -2   2  372.36   13.10
  12   2   2  363.86   12.90
  12   2   2  369.86   12.90
  12   2   2  388.86   12.80
  12   2   2  348.87   12.80
  12   2   2  375.56   12.80
  12   2   2  371.86   13.20
  12   2   2  368.36   12.60
  12   2   2  372.96   12.90
  12   2   2  367.96   12.80
  12   2   2  363.96   13.30
  12   2   2  359.26   12.90
  14  -2   2    9.00    0.90
 -14  -2  -2    9.20    0.90
  14  -2   2    9.40    0.90
  14  -2   2    9.90    0.80
  14  -2   2    9.70    0.80
 -14  -2  -2    8.20    0.90
  14  -2   2    9.60    0.70
 -14  -2  -2    8.70    0.70
 -14  -2  -2   10.00    0.70
  14  -2   2    8.10    0.70
  14   2   2    8.70    0.60
  14   2   2    7.80    0.80
  14   2   2    7.90    0.80
  14   2   2    8.40    0.60
  14   2   2    9.50    0.60
  14   2   2    7.30    0.80
  14   2   2    8.70    0.80
  14   2   2   10.40    0.60
 -14   2  -2    9.40    0.90
  14   2   2   10.10    0.60
  14   2   2    9.50    0.70
  14   2   2   10.10    0.90
  16  -2   2    5.70    0.80
 -16  -2  -2    4.40    0.70
  16  -2   2    5.40    0.70
 -16  -2  -2    5.90    0.80
 -16  -2  -2    6.70    0.60
  16  -2   2    5.60    0.70
 -16  -2  -2    6.60    0.60
  16  -2   2    4.60    0.30
  16  -2   2    5.90    0.30
  16  -2   2    5.30    0.60
  16  -2   2    6.00    0.70
  16  -2   2    5.40    0.80
  16   2   2    5.20    0.80
  16   2   2    5.00    0.50
 -16   2  -2    4.90    0.70
  16   2   2    6.90    0.50
  16   2   2    5.00    0.50
  16   2   2    5.20    0.50
  16   2   2    5.80    0.70
  16   2   2    5.50    0.80
  16   2   2    6.80    0.60
  16   2   2    5.40    0.80
  16   2   2    7.10    0.90
 -18  -2  -2   30.60    1.70
 -18  -2  -2   28.50    1.70
  18  -2   2   27.60    1.40
  18  -2   2   30.70    1.70
  18  -2   2   27.90    1.60
  18  -2   2   32.00    1.20
  18  -2   2   32.50    1.80
  18  -2   2   30.20    1.50
 -18  -2  -2   29.70    1.40
  18  -2   2   28.40    1.10
 -18  -2  -2   30.90    1.50
  18  -2   2   31.70    1.70
  18   2   2   29.70    1.30
  18   2   2   29.40    1.40
  18   2   2   33.10    1.80
  18   2   2   30.60    1.70
  18   2   2   29.10    1.60
  18   2   2   29.50    1.40
 -18   2  -2   31.10    1.60
  18   2   2   29.10    1.50
  18   2   2   29.20    1.30
  18   2   2   24.10    1.30
  18   2   2   30.70    1.30
  18   2   2   30.80    1.80
  20  -2   2   18.60    0.80
  20  -2   2   19.50    0.90
 -20  -2  -2   17.80    1.10
 -20  -2  -2   18.70    1.50
  20  -2   2   19.50    1.40
  20  -2   2   18.60    0.80
 -20  -2  -2   18.60    1.40
  20  -2   2   20.30    0.80
  20  -2   2   18.50    1.30
  20  -2   2   20.30    1.50
 -20  -2  -2   19.80    1.20
  20  -2   2   19.80    1.10
  20  -2   2   20.00    1.20
  20  -2   2   18.70    1.40
  20   2   2   20.60    1.50
 -20   2  -2   20.30    1.40
 -20   2  -2   18.10    1.40
  20   2   2   20.10    1.00
  20   2   2   20.90    1.50
  20   2   2   18.70    1.00
  20   2   2   20.30    1.50
  20   2   2   20.00    1.20
  20   2   2   19.60    1.10
  20   2   2   21.70    1.50
  20   2   2   20.30    1.00
  22  -2   2   25.00    1.60
 -22  -2  -2   21.40    1.60
 -22  -2  -2   18.60    1.50
  22  -2   2   20.70    1.20
 -22  -2  -2   19.90    1.30
  22  -2   2   19.90    1.40
  22  -2   2   21.10    0.90
  22  -2   2   19.50    1.50
  22  -2   2   20.40    1.50
  22  -2   2   21.90    1.50
  22  -2   2   21.50    1.00
 -22  -2  -2   23.00    1.40
  22  -2   2   19.80    0.90
  22  -2   2   21.10    0.90
  22   2   2   19.40    1.50
 -22   2  -2   20.20    1.40
  22   2   2   21.00    1.00
  22   2   2   20.80    1.70
 -22   2  -2   18.60    1.40
  22   2   2   20.00    1.20
  22   2   2   20.00    1.60
  22   2   2   21.20    1.00
  22   2   2   22.30    1.30
  22   2   2   21.00    1.10
  22   2   2   23.80    1.70
 -24  -2  -2    5.20    0.80
  24  -2   2    5.00    0.50
  24  -2   2    5.10    1.10
  24  -2   2    5.30    0.50
 -24  -2  -2    5.60    1.10
  24  -2   2    5.90    1.00
  24  -2   2    6.00    1.00
  24  -2   2    5.20    0.50
 -24  -2  -2    5.70    0.90
  24  -2   2    5.90    0.90
  24  -2   2    5.10    0.50
 -24  -2  -2    4.80    1.00
  24  -2   2    5.50    0.80
  24   2   2    4.30    1.00
  24   2   2    4.40    0.60
  24   2   2    4.80    0.60
  24   2   2    6.50    1.20
 -24   2  -2    4.60    1.00
  24   2   2    4.40    0.40
  24   2   2    5.50    0.80
  24   2   2    5.50    1.10
  24   2   2    5.50    0.40
  24   2   2    4.50    1.00
 -24   2  -2    4.90    1.00
 -26  -2  -2   15.00    1.60
  26  -2   2   15.00    1.50
 -26  -2  -2   16.90    1.60
  26  -2   2   16.10    1.40
  26  -2   2   15.90    0.90
  26  -2   2   19.30    1.70
  26  -2   2   16.30    0.90
 -26  -2  -2   17.40    1.30
  26  -2   2   17.30    1.60
 -26   2  -2   15.50    1.60
  26   2   2   15.60    1.10
 -26   2  -2   14.00    1.50
  26   2   2   18.30    1.80
  26   2   2   14.30    1.50
  26   2   2   18.40    1.60
  26   2   2   15.10    1.10
 -26   2  -2   17.10    1.50
  26   2   2   17.50    1.70
  26   2   2   16.00    1.30
  28  -2   2   10.20    0.80
 -28  -2  -2   12.20    1.50
  28  -2   2    9.30    1.30
  28  -2   2    7.80    1.30
  28  -2   2   10.20    0.80
 -28  -2  -2    9.30    1.40
  28  -2   2   10.10    1.40
 -28   2  -2    7.80    1.20
 -28   2  -2    8.20    1.30
  28   2   2    9.50    1.40
  28   2   2    9.10    1.40
 -28   2  -2   10.70    1.40
  28   2   2    8.10    0.90
  28   2   2   10.20    0.90
  28   2   2    9.60    1.30
  28   2   2    8.80    1.30
 -30  -2  -2    7.00    1.50
 -30  -2  -2   11.90    1.50
  30  -2   2    8.00    1.30
  30  -2   2    9.00    1.50
  30  -2   2    9.10    0.70
  30  -2   2    8.70    0.70
  30  -2   2    9.60    1.40
  30   2   2   10.60    1.40
 -30   2  -2    8.70    1.30
  30   2   2    9.80    1.60
  30   2   2    4.50    1.20
  30   2   2    6.40    0.90
  30   2   2    7.20    0.90
 -30   2  -2    7.20    1.40
  30   2   2    8.70    1.40
 -30   2  -2   10.00    1.40
 -30   2  -2    8.90    1.50
 -32  -2  -2    0.40    1.20
  32  -2   2    0.10    0.50
  32  -2   2    0.40    0.50
 -32  -2  -2    1.00    1.00
  32  -2   2    0.20    1.00
  32  -2   2    0.40    1.00
  32  -2   2    2.30    1.10
 -32   2  -2    1.90    1.10
  32   2   2    0.30    0.60
 -32   2  -2   -1.20    1.10
  32   2   2    1.00    1.00
 -32   2  -2   -0.30    0.80
  32   2   2    0.20    1.20
  32   2   2    1.50    1.00
  32   2   2   -0.20    1.00
  32   2   2    0.70    0.60
 -32   2  -2    1.50    1.10
  33  -3  -2   14.00    1.10
  33  -3  -2   12.40    1.80
  33  -3  -2   12.20    1.60
  33  -3  -2   15.30    1.70
 -33  -3   2   12.50    1.80
 -33  -3   2    9.80    1.60
  33  -3  -2   11.30    1.00
 -33   3   2   14.30    1.80
  33   3  -2   10.40    1.20
  33   3  -2   11.60    1.60
 -33   3   2   13.10    1.60
 -33   3   2   10.30    1.50
  33   3  -2   11.30    1.70
  33   3  -2   11.70    1.20
  31  -3  -2   10.10    1.50
  31  -3  -2    7.40    0.80
  31  -3  -2    7.70    1.40
 -31  -3   2    6.40    1.50
 -31  -3   2    8.90    1.40
  31  -3  -2    7.30    1.30
  31  -3  -2    8.60    0.90
  31   3  -2    7.60    1.00
  31   3  -2    8.00    1.00
  31   3  -2    8.40    1.40
 -31   3   2    9.30    1.40
  31   3  -2    8.20    1.50
  31   3  -2    7.10    1.30
  31   3  -2    6.00    1.30
  31   3  -2   10.00    0.80
 -31   3   2    6.90    1.30
 -31   3   2    7.70    1.50
 -29  -3   2    0.90    0.90
  29  -3  -2    0.00    0.80
  29  -3  -2    0.10    0.50
  29  -3  -2    0.70    0.50
  29  -3  -2    0.20    0.80
  29  -3  -2    0.40    1.00
 -29  -3   2   -0.40    1.00
 -29   3   2   -0.50    0.80
  29   3  -2    2.20    1.10
  29   3  -2    1.70    0.70
 -29   3   2   -0.20    0.80
  29   3  -2    1.50    0.60
  29   3  -2    1.20    0.50
  29   3  -2    1.40    1.10
  29   3  -2    0.40    0.90
  29   3  -2    0.50    0.90
 -27  -3   2   21.70    1.50
  27  -3  -2   20.80    1.20
  27  -3  -2   25.30    1.80
 -27  -3   2   22.70    1.90
  27  -3  -2   22.10    1.20
 -27  -3   2   23.00    2.00
  27  -3  -2   22.60    1.90
  27  -3  -2   22.80    1.80
 -27   3   2   20.90    1.80
  27   3  -2   19.50    1.40
  27   3  -2   20.90    1.40
  27   3  -2   21.40    1.30
  27   3  -2   24.00    1.80
 -27   3   2   20.90    1.80
  27   3  -2   20.60    1.90
  27   3  -2   18.40    1.80
  27   3  -2   21.50    1.80
  25  -3  -2    0.00    0.70
 -25  -3   2    0.70    0.90
 -25  -3   2    0.90    0.70
 -25  -3   2    0.30    0.80
  25  -3  -2    0.40    0.40
  25  -3  -2   -0.40    0.70
  25  -3  -2    1.30    0.80
 -25  -3   2    0.00    0.70
  25  -3  -2   -0.50    0.40
  25   3  -2   -0.40    0.50
 -25   3   2    0.80    0.80
 -25   3   2   -0.30    0.70
  25   3  -2   -1.00    0.80
  25   3  -2    0.10    0.70
  25   3  -2    1.30    0.80
  25   3  -2   -0.70    0.50
  25   3  -2   -0.60    0.50
  25   3  -2    0.00    0.70
  25   3  -2   -0.70    0.60
 -23  -3   2   10.20    1.20
  23  -3  -2   12.20    1.30
  23  -3  -2   11.10    0.80
 -23  -3   2   12.60    1.30
  23  -3  -2   12.30    0.90
 -23  -3   2   11.30    1.00
  23  -3  -2   11.20    1.30
 -23  -3   2   11.70    1.00
  23  -3  -2   12.90    1.30
  23   3  -2   11.90    1.10
  23   3  -2   11.70    1.30
  23   3  -2   12.20    1.30
 -23   3   2   10.20    1.20
 -23   3   2   10.20    1.30
  23   3  -2   11.20    1.30
  23   3  -2   12.10    1.00
  23   3  -2    9.70    0.90
  23   3  -2   11.40    1.00
  23   3  -2   10.50    1.30
 -21  -3   2   20.50    1.30
 -21  -3   2   21.40    1.30
  21  -3  -2   23.20    1.10
  21  -3  -2   21.60    1.10
  21  -3  -2   19.00    0.90
  21  -3  -2   22.50    1.50
  21  -3  -2   21.60    0.90
  21  -3  -2   22.20    1.10
  21  -3  -2   19.10    1.10
  21  -3  -2   23.00    1.20
  21  -3  -2   23.10    1.70
 -21  -3   2   21.40    1.60
 -21  -3   2   22.80    1.60
  21  -3  -2   19.70    1.50
  21  -3  -2   22.10    1.50
  21   3  -2   19.80    1.20
  21   3  -2   18.90    1.20
  21   3  -2   22.00    1.50
  21   3  -2   23.10    1.30
  21   3  -2   20.20    1.20
 -21   3   2   20.20    1.60
  21   3  -2   22.60    1.70
  21   3  -2   21.70    1.50
 -21   3   2   21.20    1.50
  21   3  -2   20.60    1.50
  19  -3  -2   21.80    1.50
 -19  -3   2   23.60    1.30
  19  -3  -2   20.80    1.10
  19  -3  -2   23.00    1.40
 -19  -3   2   23.90    1.50
  19  -3  -2   21.80    1.00
  19  -3  -2   25.80    1.00
  19  -3  -2   22.50    1.40
  19  -3  -2   23.50    1.60
 -19  -3   2   25.20    1.30
  19  -3  -2   22.70    1.10
  19   3  -2   22.60    1.50
  19   3  -2   23.00    1.30
  19   3  -2   23.90    1.20
 -19   3   2   23.20    1.50
 -19   3   2   23.40    1.50
  19   3  -2   25.90    1.60
 -17  -3   2    3.90    0.60
  17  -3  -2    3.00    0.70
  17  -3  -2    4.30    0.40
  17  -3  -2    3.00    0.40
  17  -3  -2    3.30    0.40
  17  -3  -2    4.60    0.70
 -17  -3   2    4.20    0.60
  17  -3  -2    4.30    0.50
  17  -3  -2    4.30    0.70
  17  -3  -2    4.10    0.40
  17  -3  -2    3.60    0.40
 -17  -3   2    3.70    0.80
  17  -3  -2    3.80    0.80
  17  -3  -2    4.70    0.40
  17   3  -2    4.30    0.60
  17   3  -2    4.20    0.70
  17   3  -2    4.10    0.50
  17   3  -2    1.60    0.60
 -17   3   2    3.60    0.70
  17   3  -2    4.40    0.70
 -17   3   2    3.10    0.70
  17   3  -2    4.20    0.60
  15  -3  -2   60.09    2.10
 -15  -3   2   52.49    2.40
 -15  -3   2   57.59    2.20
 -15  -3   2   53.09    2.50
  15  -3  -2   54.89    2.40
  15  -3  -2   52.29    2.30
 -15  -3   2   57.29    2.30
  15  -3  -2   52.29    2.10
  15  -3  -2   55.89    2.20
  15  -3  -2   58.39    2.50
  15  -3  -2   58.39    2.20
  15  -3  -2   54.09    2.10
  15  -3  -2   57.39    2.50
  15  -3  -2   54.89    2.10
  15   3  -2   52.99    2.30
  15   3  -2   52.79    2.20
  15   3  -2   51.99    2.40
  15   3  -2   55.19    2.50
  15   3  -2   51.89    2.20
  15   3  -2   56.69    2.50
  15   3  -2   57.29    2.30
 -15   3   2   54.89    2.40
  13  -3  -2   17.90    1.10
 -13  -3   2   17.60    1.20
  13  -3  -2   16.00    1.00
  13  -3  -2   18.30    0.90
 -13  -3   2   17.40    1.10
 -13  -3   2   18.00    0.90
  13  -3  -2   17.70    0.90
 -13  -3   2   18.00    1.00
  13  -3  -2   18.20    0.90
  13  -3  -2   16.20    0.80
  13  -3  -2   15.90    1.00
  13  -3  -2   16.80    0.90
  13  -3  -2   19.20    0.90
  13  -3  -2   17.10    1.10
 -13   3   2   17.70    1.10
  13   3  -2   18.10    1.10
  13   3  -2   18.30    0.80
  13   3  -2   17.70    0.80
  13   3  -2   16.30    1.00
  13   3  -2   17.70    1.10
  13   3  -2   16.80    1.00
  13   3  -2   18.40    1.00
  13   3  -2   18.50    1.00
  11  -3  -2   46.80    1.90
  11  -3  -2   50.29    2.00
 -11  -3   2   47.30    1.90
  11  -3  -2   49.30    2.20
 -11  -3   2   47.50    2.10
 -11  -3   2   51.19    2.00
  11  -3  -2   51.19    1.90
  11  -3  -2   51.79    1.90
  11  -3  -2   41.50    2.10
  11  -3  -2   45.60    1.90
  11  -3  -2   49.70    2.10
  11  -3  -2   52.49    1.90
  11  -3  -2   49.70    1.90
 -11  -3   2   45.50    2.10
  11   3  -2   48.70    2.00
  11   3  -2   49.60    1.80
  11   3  -2   51.89    1.80
  11   3  -2   48.00    2.10
  11   3  -2   52.09    2.00
 -11   3   2   48.20    2.10
  11   3  -2   47.00    2.00
  11   3  -2   49.00    2.00
[truncated: 5,007,170 more chars]
