# Supplementary material for: π-Stacking Stopper-Macrocycle Stabilized Dynamically Interlocked [2]Rotaxanes
Source: Molecules. 2021 Aug 3;26(15):4704. doi: 10.3390/molecules26154704 (PMC8347712; doi:10.3390/molecules26154704)
Supplement: Supplementary file 1 [file molecules-26-04704-s001.zip › 10.cif]

data_10HPF6
_audit_creation_date               2020-07-16
_audit_creation_method
;
Olex2 1.2
(compiled 2018.05.29 svn.r3508 for OlexSys, GUI svn.r5506)
;
_shelx_SHELXL_version_number       '2018/3'
_audit_contact_author_address      ?
_audit_contact_author_email        ?
_audit_contact_author_name         ''
_audit_contact_author_phone        ?
_publ_contact_author_id_orcid      ?
_publ_section_references
;
Dolomanov, O.V., Bourhis, L.J., Gildea, R.J, Howard, J.A.K. & Puschmann, H.
 (2009), J. Appl. Cryst. 42, 339-341.

Sheldrick, G.M. (2015). Acta Cryst. A71, 3-8.

Sheldrick, G.M. (2015). Acta Cryst. C71, 3-8.
;
_chemical_name_common              ?
_chemical_name_systematic          ?
_chemical_formula_moiety          
 '2(F6 P), 2(C24 H24 N O2), C27 H29 N3 O5, C27 H23 N3 O5, 4(C2 H3 N)'
_chemical_formula_sum              'C110 H118 F12 N12 O14 P2'
_chemical_formula_weight           2122.10
_chemical_melting_point            ?
loop_
  _atom_type_symbol
  _atom_type_description
  _atom_type_scat_dispersion_real
  _atom_type_scat_dispersion_imag
  _atom_type_scat_source
 'C' 'C' 0.0033 0.0016 'International Tables Vol C Tables 4.2.6.8 and 6.1.1.4'
 'H' 'H' 0.0000 0.0000 'International Tables Vol C Tables 4.2.6.8 and 6.1.1.4'
 'F' 'F' 0.0171 0.0103 'International Tables Vol C Tables 4.2.6.8 and 6.1.1.4'
 'N' 'N' 0.0061 0.0033 'International Tables Vol C Tables 4.2.6.8 and 6.1.1.4'
 'O' 'O' 0.0106 0.0060 'International Tables Vol C Tables 4.2.6.8 and 6.1.1.4'
 'P' 'P' 0.1023 0.0942 'International Tables Vol C Tables 4.2.6.8 and 6.1.1.4'

_shelx_space_group_comment
;
The symmetry employed for this shelxl refinement is uniquely defined
by the following loop, which should always be used as a source of
symmetry information in preference to the above space-group names.
They are only intended as comments.
;
_space_group_crystal_system        'triclinic'
_space_group_IT_number             2
_space_group_name_H-M_alt          'P -1'
_space_group_name_Hall             '-P 1'
loop_
  _space_group_symop_operation_xyz
 'x, y, z'
 '-x, -y, -z'

_cell_length_a                     14.868(3)
_cell_length_b                     17.598(4)
_cell_length_c                     23.155(5)
_cell_angle_alpha                  69.301(4)
_cell_angle_beta                   76.238(4)
_cell_angle_gamma                  69.289(4)
_cell_volume                       5257.0(19)
_cell_formula_units_Z              2
_cell_measurement_reflns_used      9279
_cell_measurement_temperature      173
_cell_measurement_theta_max        23.14
_cell_measurement_theta_min        2.55
_shelx_estimated_absorpt_T_max     0.962
_shelx_estimated_absorpt_T_min     0.937
_exptl_absorpt_coefficient_mu      0.132
_exptl_absorpt_correction_T_max    0.7456
_exptl_absorpt_correction_T_min    0.6591
_exptl_absorpt_correction_type     multi-scan
_exptl_absorpt_process_details    
 'SADABS-2008/1 (Bruker,2008) was used for absorption correction. wR2(int) was 0.0725 before and 0.0507 after correction. The Ratio of minimum to maximum transmission is 0.8840. The \l/2 correction factor is 0.0015.'
_exptl_absorpt_special_details     ?
_exptl_crystal_colour              'clear yellowish yellow'
_exptl_crystal_colour_lustre       clear
_exptl_crystal_colour_modifier     yellowish
_exptl_crystal_colour_primary      yellow
_exptl_crystal_density_diffrn      1.341
_exptl_crystal_density_meas        ?
_exptl_crystal_density_method      ?
_exptl_crystal_description         plate
_exptl_crystal_F_000               2224
_exptl_crystal_size_max            0.5
_exptl_crystal_size_mid            0.4
_exptl_crystal_size_min            0.3
_exptl_transmission_factor_max     ?
_exptl_transmission_factor_min     ?
_diffrn_reflns_av_R_equivalents    0.0578
_diffrn_reflns_av_unetI/netI       0.0461
_diffrn_reflns_Laue_measured_fraction_full  0.998
_diffrn_reflns_Laue_measured_fraction_max  0.998
_diffrn_reflns_limit_h_max         18
_diffrn_reflns_limit_h_min         -17
_diffrn_reflns_limit_k_max         21
_diffrn_reflns_limit_k_min         -21
_diffrn_reflns_limit_l_max         28
_diffrn_reflns_limit_l_min         -28
_diffrn_reflns_number              128201
_diffrn_reflns_point_group_measured_fraction_full  0.998
_diffrn_reflns_point_group_measured_fraction_max  0.998
_diffrn_reflns_theta_full          25.242
_diffrn_reflns_theta_max           26.373
_diffrn_reflns_theta_min           0.948
_diffrn_ambient_temperature        173
_diffrn_detector                   'Bruker APEX2 area detector'
_diffrn_detector_area_resol_mean   7.9
_diffrn_detector_type              'CCD area detector'
_diffrn_measured_fraction_theta_full  0.998
_diffrn_measured_fraction_theta_max  0.998
_diffrn_measurement_device         'three-circle diffractometer'
_diffrn_measurement_device_type    'Bruker SMART APEX2 area detector'
_diffrn_measurement_method         '\w and \f scans'
_diffrn_radiation_monochromator    'mirror optics'
_diffrn_radiation_probe            x-ray
_diffrn_radiation_type             MoK\a
_diffrn_radiation_wavelength       0.71073
_diffrn_source                     'microfocus sealed X-ray tube'
_diffrn_source_type                'Incoatec I\ms'
_diffrn_standards_number           0
_reflns_Friedel_coverage           0.000
_reflns_Friedel_fraction_full      .
_reflns_Friedel_fraction_max       .
_reflns_number_gt                  13716
_reflns_number_total               21471
_reflns_special_details
;
 Reflections were merged by SHELXL according to the crystal
 class for the calculation of statistics and refinement.
 
 _reflns_Friedel_fraction is defined as the number of unique
 Friedel pairs measured divided by the number that would be
 possible theoretically, ignoring centric projections and
 systematic absences.
;
_reflns_threshold_expression       'I > 2\s(I)'
_computing_cell_refinement         'SAINT V8.18C (?, 2016)'
_computing_data_collection         ?
_computing_data_reduction          'SAINT V8.18C (?, 2016)'
_computing_molecular_graphics      'Olex2 (Dolomanov et al., 2009)'
_computing_publication_material    'Olex2 (Dolomanov et al., 2009)'
_computing_structure_refinement    'ShelXL (Sheldrick, 2015)'
_computing_structure_solution      'ShelXT (Sheldrick, 2015)'
_refine_diff_density_max           1.203
_refine_diff_density_min           -0.501
_refine_diff_density_rms           0.055
_refine_ls_extinction_coef         .
_refine_ls_extinction_method       none
_refine_ls_goodness_of_fit_ref     1.027
_refine_ls_hydrogen_treatment      constr
_refine_ls_matrix_type             full
_refine_ls_number_parameters       1413
_refine_ls_number_reflns           21471
_refine_ls_number_restraints       0
_refine_ls_R_factor_all            0.1062
_refine_ls_R_factor_gt             0.0616
_refine_ls_restrained_S_all        1.027
_refine_ls_shift/su_max            0.001
_refine_ls_shift/su_mean           0.000
_refine_ls_structure_factor_coef   Fsqd
_refine_ls_weighting_details      
 'w=1/[\s^2^(Fo^2^)+(0.0830P)^2^+3.8876P] where P=(Fo^2^+2Fc^2^)/3'
_refine_ls_weighting_scheme        calc
_refine_ls_wR_factor_gt            0.1584
_refine_ls_wR_factor_ref           0.1861
_refine_special_details            ?
_olex2_refinement_description
;
1. Fixed Uiso
 At 1.2 times of:
  All C(H) groups, All C(H,H) groups, All N(H,H) groups
 At 1.5 times of:
  All C(H,H,H) groups
2. Others
 Fixed Sof: F7(0.5) F9(0.7) F11(0.6) F12(0.5) C93(0.6) O13(0.6) O13A(0.4)
 C93A(0.4) F12A(0.3) F9A(0.4) F7A(0.5) F11A(0.5)
3.a Secondary CH2 refined with riding coordinates:
 N1(H1A,H1B), N5(H5A,H5B), C7(H7A,H7B), C8(H8A,H8B), C37(H37A,H37B), C38(H38A,
 H38B), C39(H39A,H39B), C40(H40A,H40B), C41(H41A,H41B), C42(H42A,H42B),
 C43(H43A,H43B), C44(H44A,H44B), C58(H58A,H58B), C59(H59A,H59B), C88(H88A,H88B),
  C89(H89A,H89B), C90(H90A,H90B), C91(H91A,H91B), C95(H95A,H95B)
3.b Aromatic/amide H refined with riding coordinates:
 C2(H2), C4(H4), C6(H6), C11(H11), C12(H12), C13(H13), C14(H14), C16(H16),
 C18(H18), C19(H19), C20(H20), C21(H21), C26(H26), C27(H27), C28(H28), C30(H30),
  C32(H32), C33(H33), C34(H34), C35(H35), C46(H46), C47(H47), C48(H48),
 C49(H49), C51(H51), C52(H52), C54(H54), C56(H56), C62(H62), C63(H63), C64(H64),
  C65(H65), C67(H67), C69(H69), C70(H70), C71(H71), C72(H72), C77(H77),
 C78(H78), C79(H79), C81(H81), C83(H83), C84(H84), C85(H85), C86(H86), C97(H97),
  C98(H98), C99(H99), C100(H100), C102(H102)
3.c Idealised Me refined as rotating group:
 C23(H23A,H23B,H23C), C24(H24A,H24B,H24C), C74(H74A,H74B,H74C), C75(H75A,H75B,
 H75C), C104(H10A,H10B,H10C), C106(H10D,H10E,H10F), C108(H10G,H10H,H10I),
 C110(H11A,H11B,H11C)
;
_atom_sites_solution_hydrogens     geom
_atom_sites_solution_primary       dual
_atom_sites_solution_secondary     ?
loop_
  _atom_site_label
  _atom_site_type_symbol
  _atom_site_fract_x
  _atom_site_fract_y
  _atom_site_fract_z
  _atom_site_U_iso_or_equiv
  _atom_site_adp_type
  _atom_site_occupancy
  _atom_site_site_symmetry_order
  _atom_site_calc_flag
  _atom_site_refinement_flags_posn
  _atom_site_refinement_flags_adp
  _atom_site_refinement_flags_occupancy
  _atom_site_disorder_assembly
  _atom_site_disorder_group
 P1 P 0.80810(7) 1.06201(5) 0.13617(4) 0.0509(2) Uani 1 1 d . . . . .
 P2 P 0.82318(7) 0.57088(5) 0.64340(4) 0.0487(2) Uani 1 1 d . . . . .
 F1 F 0.82207(18) 1.01276(18) 0.08768(13) 0.0982(8) Uani 1 1 d . . . . .
 F2 F 0.7416(2) 1.14444(19) 0.09520(13) 0.1293(12) Uani 1 1 d . . . . .
 F3 F 0.7932(2) 1.11128(16) 0.18428(11) 0.0985(8) Uani 1 1 d . . . . .
 F4 F 0.8757(2) 0.97930(17) 0.17710(14) 0.1159(10) Uani 1 1 d . . . . .
 F5 F 0.7169(2) 1.0325(2) 0.17100(15) 0.1211(11) Uani 1 1 d . . . . .
 F6 F 0.8990(2) 1.0918(2) 0.09935(15) 0.1138(10) Uani 1 1 d . . . . .
 F7 F 0.8290(9) 0.5290(9) 0.5929(6) 0.118(5) Uani 0.5 1 d . . P A 1
 F8 F 0.7796(2) 0.66396(15) 0.60091(12) 0.0993(8) Uani 1 1 d . . . . .
 F9 F 0.8098(6) 0.6162(3) 0.69303(19) 0.1119(18) Uani 0.7 1 d . . P A 1
 F10 F 0.8701(3) 0.47933(15) 0.68562(16) 0.1311(12) Uani 1 1 d . . . . .
 F11 F 0.7119(4) 0.5692(4) 0.6630(4) 0.117(2) Uani 0.6 1 d . . P A 1
 F12 F 0.9246(7) 0.5753(9) 0.6241(8) 0.144(6) Uani 0.5 1 d . . P A 1
 O1 O 0.84499(13) 0.52243(12) -0.11519(9) 0.0388(4) Uani 1 1 d . . . . .
 O2 O 0.57342(14) 0.75296(12) -0.19137(9) 0.0408(5) Uani 1 1 d . . . . .
 O3 O 0.49233(13) 0.84878(11) 0.08903(9) 0.0411(5) Uani 1 1 d . . . . .
 O4 O 0.39682(16) 0.73444(12) 0.18254(10) 0.0489(5) Uani 1 1 d . . . . .
 O5 O 0.41853(15) 0.57541(15) 0.17269(11) 0.0563(6) Uani 1 1 d . . . . .
 O6 O 0.54436(15) 0.46141(15) 0.10956(12) 0.0584(6) Uani 1 1 d . . . . .
 O7 O 0.75663(12) 0.41775(11) 0.08421(9) 0.0353(4) Uani 1 1 d . . . . .
 O8 O 0.15024(13) 0.98150(13) 0.62386(9) 0.0440(5) Uani 1 1 d . . . . .
 O9 O 0.42906(15) 0.76482(12) 0.70338(9) 0.0465(5) Uani 1 1 d . . . . .
 O10 O 0.24864(13) 1.06634(12) 0.41862(10) 0.0444(5) Uani 1 1 d . . . . .
 O11 O 0.45843(15) 1.01746(15) 0.39842(13) 0.0634(7) Uani 1 1 d . . . . .
 O12 O 0.58698(16) 0.89007(15) 0.34384(12) 0.0615(6) Uani 1 1 d . . . . .
 O14 O 0.49698(12) 0.63544(11) 0.44959(8) 0.0342(4) Uani 1 1 d . . . . .
 N1 N 0.67607(14) 0.62228(12) 0.07317(9) 0.0246(4) Uani 1 1 d . . . . .
 H1A H 0.719897 0.651509 0.053281 0.029 Uiso 1 1 calc R . . . .
 H1B H 0.708006 0.565817 0.080173 0.029 Uiso 1 1 calc R . . . .
 N2 N 0.83370(14) 0.69143(12) 0.02141(9) 0.0273(4) Uani 1 1 d . . . . .
 N3 N 0.64965(15) 0.81509(12) 0.00523(10) 0.0294(5) Uani 1 1 d . . . . .
 N4 N 0.87576(14) 0.50768(13) 0.07655(10) 0.0286(5) Uani 1 1 d . . . . .
 N5 N 0.31988(13) 0.86246(12) 0.44283(9) 0.0244(4) Uani 1 1 d . . . . .
 H5A H 0.289646 0.919465 0.431960 0.029 Uiso 1 1 calc R . . . .
 H5B H 0.274529 0.835470 0.464372 0.029 Uiso 1 1 calc R . . . .
 N6 N 0.15220(14) 0.80493(12) 0.49583(9) 0.0269(4) Uani 1 1 d . . . . .
 N7 N 0.12825(14) 0.98004(12) 0.42431(10) 0.0280(5) Uani 1 1 d . . . . .
 N8 N 0.32904(14) 0.67987(12) 0.52448(9) 0.0282(5) Uani 1 1 d . . . . .
 N9 N 0.2069(3) 0.6786(2) 0.0653(2) 0.1006(14) Uani 1 1 d . . . . .
 N10 N 0.1590(2) 0.9677(2) 0.08904(17) 0.0758(9) Uani 1 1 d . . . . .
 N11 N 0.8229(3) 0.5286(3) 0.4316(3) 0.1224(18) Uani 1 1 d . . . . .
 N12 N 0.7929(3) 0.8127(3) 0.4377(2) 0.1104(15) Uani 1 1 d . . . . .
 C1 C 0.76016(17) 0.58492(16) -0.10795(12) 0.0290(5) Uani 1 1 d . . . . .
 C2 C 0.70855(18) 0.64164(16) -0.15578(12) 0.0308(6) Uani 1 1 d . . . . .
 H2 H 0.731555 0.640656 -0.197537 0.037 Uiso 1 1 calc R . . . .
 C3 C 0.62152(18) 0.70073(15) -0.14153(12) 0.0297(5) Uani 1 1 d . . . . .
 C4 C 0.58789(18) 0.70346(15) -0.08109(12) 0.0288(5) Uani 1 1 d . . . . .
 H4 H 0.528764 0.744197 -0.072126 0.035 Uiso 1 1 calc R . . . .
 C5 C 0.64180(17) 0.64565(15) -0.03329(11) 0.0263(5) Uani 1 1 d . . . . .
 C6 C 0.72792(17) 0.58651(16) -0.04658(12) 0.0296(5) Uani 1 1 d . . . . .
 H6 H 0.764801 0.547294 -0.014161 0.035 Uiso 1 1 calc R . . . .
 C7 C 0.60067(17) 0.64692(16) 0.03272(11) 0.0283(5) Uani 1 1 d . . . . .
 H7A H 0.557802 0.704859 0.032052 0.034 Uiso 1 1 calc R . . . .
 H7B H 0.560537 0.607531 0.050772 0.034 Uiso 1 1 calc R . . . .
 C8 C 0.63374(18) 0.64000(17) 0.13441(11) 0.0306(6) Uani 1 1 d . . . . .
 H8A H 0.580131 0.614406 0.153711 0.037 Uiso 1 1 calc R . . . .
 H8B H 0.606750 0.702204 0.127381 0.037 Uiso 1 1 calc R . . . .
 C9 C 0.70969(17) 0.60400(16) 0.17788(11) 0.0297(6) Uani 1 1 d . . . . .
 C10 C 0.73142(18) 0.51674(16) 0.21247(11) 0.0309(6) Uani 1 1 d . . . . .
 C11 C 0.6807(2) 0.46174(18) 0.21087(13) 0.0379(6) Uani 1 1 d . . . . .
 H11 H 0.628092 0.484688 0.187050 0.045 Uiso 1 1 calc R . . . .
 C12 C 0.7062(2) 0.37775(19) 0.24265(14) 0.0446(7) Uani 1 1 d . . . . .
 H12 H 0.671526 0.342866 0.240575 0.054 Uiso 1 1 calc R . . . .
 C13 C 0.7836(2) 0.34133(19) 0.27874(14) 0.0480(8) Uani 1 1 d . . . . .
 H13 H 0.801231 0.282186 0.300204 0.058 Uiso 1 1 calc R . . . .
 C14 C 0.8324(2) 0.39039(18) 0.28280(13) 0.0442(7) Uani 1 1 d . . . . .
 H14 H 0.883974 0.365322 0.307542 0.053 Uiso 1 1 calc R . . . .
 C15 C 0.80812(19) 0.47938(17) 0.25063(12) 0.0356(6) Uani 1 1 d . . . . .
 C16 C 0.8581(2) 0.53062(19) 0.25421(13) 0.0404(7) Uani 1 1 d . . . . .
 H16 H 0.908597 0.505923 0.279792 0.049 Uiso 1 1 calc R . . . .
 C17 C 0.83691(19) 0.61659(18) 0.22174(13) 0.0371(6) Uani 1 1 d . . . . .
 C18 C 0.8892(2) 0.6682(2) 0.22631(15) 0.0503(8) Uani 1 1 d . . . . .
 H18 H 0.939146 0.643229 0.252342 0.060 Uiso 1 1 calc R . . . .
 C19 C 0.8688(2) 0.7518(2) 0.19420(16) 0.0554(8) Uani 1 1 d . . . . .
 H19 H 0.903795 0.785317 0.198093 0.066 Uiso 1 1 calc R . . . .
 C20 C 0.7956(2) 0.7892(2) 0.15495(15) 0.0507(8) Uani 1 1 d . . . . .
 H20 H 0.782320 0.847788 0.132194 0.061 Uiso 1 1 calc R . . . .
 C21 C 0.7438(2) 0.74348(18) 0.14894(13) 0.0394(6) Uani 1 1 d . . . . .
 H21 H 0.694740 0.770662 0.122178 0.047 Uiso 1 1 calc R . . . .
 C22 C 0.76143(18) 0.65459(17) 0.18226(11) 0.0320(6) Uani 1 1 d . . . . .
 C23 C 0.8782(2) 0.5107(2) -0.17568(14) 0.0494(8) Uani 1 1 d . . . . .
 H23A H 0.894360 0.561378 -0.204912 0.074 Uiso 1 1 calc GR . . . .
 H23B H 0.826956 0.501444 -0.189958 0.074 Uiso 1 1 calc GR . . . .
 H23C H 0.935898 0.461070 -0.173538 0.074 Uiso 1 1 calc GR . . . .
 C24 C 0.4774(2) 0.80600(19) -0.17893(15) 0.0478(8) Uani 1 1 d . . . . .
 H24A H 0.449300 0.836922 -0.218005 0.072 Uiso 1 1 calc GR . . . .
 H24B H 0.479778 0.846712 -0.159805 0.072 Uiso 1 1 calc GR . . . .
 H24C H 0.437352 0.770709 -0.150467 0.072 Uiso 1 1 calc GR . . . .
 C25 C 0.92168(17) 0.63943(16) 0.03493(12) 0.0301(5) Uani 1 1 d . . . . .
 C26 C 1.00146(19) 0.66912(18) 0.02449(13) 0.0384(6) Uani 1 1 d . . . . .
 H26 H 1.062386 0.630732 0.035974 0.046 Uiso 1 1 calc R . . . .
 C27 C 0.9908(2) 0.75454(19) -0.00261(14) 0.0424(7) Uani 1 1 d . . . . .
 H27 H 1.044020 0.776173 -0.010108 0.051 Uiso 1 1 calc R . . . .
 C28 C 0.9016(2) 0.80792(18) -0.01862(14) 0.0400(7) Uani 1 1 d . . . . .
 H28 H 0.892773 0.866901 -0.038728 0.048 Uiso 1 1 calc R . . . .
 C29 C 0.82418(18) 0.77485(16) -0.00513(11) 0.0296(5) Uani 1 1 d . . . . .
 C30 C 0.72821(19) 0.83348(16) -0.01985(12) 0.0319(6) Uani 1 1 d . . . . .
 H30 H 0.724661 0.887670 -0.049505 0.038 Uiso 1 1 calc R . . . .
 C31 C 0.56180(18) 0.87504(15) -0.01525(13) 0.0314(6) Uani 1 1 d . . . . .
 C32 C 0.5533(2) 0.91420(17) -0.07844(14) 0.0413(7) Uani 1 1 d . . . . .
 H32 H 0.608136 0.902623 -0.108444 0.050 Uiso 1 1 calc R . . . .
 C33 C 0.4660(3) 0.96969(19) -0.09798(16) 0.0514(8) Uani 1 1 d . . . . .
 H33 H 0.460514 0.995561 -0.141113 0.062 Uiso 1 1 calc R . . . .
 C34 C 0.3873(2) 0.98693(19) -0.05437(17) 0.0518(8) Uani 1 1 d . . . . .
 H34 H 0.327487 1.025526 -0.067624 0.062 Uiso 1 1 calc R . . . .
 C35 C 0.3938(2) 0.94941(17) 0.00797(16) 0.0450(7) Uani 1 1 d . . . . .
 H35 H 0.338788 0.962755 0.037505 0.054 Uiso 1 1 calc R . . . .
 C36 C 0.48060(19) 0.89171(15) 0.02827(13) 0.0348(6) Uani 1 1 d . . . . .
 C37 C 0.4147(2) 0.87007(18) 0.13625(15) 0.0493(8) Uani 1 1 d . . . . .
 H37A H 0.351589 0.883091 0.122209 0.059 Uiso 1 1 calc R . . . .
 H37B H 0.416321 0.920825 0.144822 0.059 Uiso 1 1 calc R . . . .
 C38 C 0.4269(2) 0.79589(18) 0.19374(14) 0.0445(7) Uani 1 1 d . . . . .
 H38A H 0.495460 0.772480 0.201554 0.053 Uiso 1 1 calc R . . . .
 H38B H 0.386278 0.812985 0.230298 0.053 Uiso 1 1 calc R . . . .
 C39 C 0.3930(2) 0.66427(19) 0.23491(14) 0.0497(8) Uani 1 1 d . . . . .
 H39A H 0.350393 0.683653 0.270120 0.060 Uiso 1 1 calc R . . . .
 H39B H 0.458649 0.633192 0.247297 0.060 Uiso 1 1 calc R . . . .
 C40 C 0.3546(2) 0.60725(19) 0.21994(14) 0.0435(7) Uani 1 1 d . . . . .
 H40A H 0.347337 0.559496 0.257612 0.052 Uiso 1 1 calc R . . . .
 H40B H 0.290017 0.639044 0.205995 0.052 Uiso 1 1 calc R . . . .
 C41 C 0.3897(2) 0.51548(19) 0.15966(15) 0.0460(7) Uani 1 1 d . . . . .
 H41A H 0.319951 0.538308 0.154590 0.055 Uiso 1 1 calc R . . . .
 H41B H 0.399179 0.462421 0.194874 0.055 Uiso 1 1 calc R . . . .
 C42 C 0.4468(3) 0.4969(2) 0.10249(19) 0.0626(10) Uani 1 1 d . . . . .
 H42A H 0.423966 0.456997 0.092661 0.075 Uiso 1 1 calc R . . . .
 H42B H 0.437619 0.550097 0.067377 0.075 Uiso 1 1 calc R . . . .
 C43 C 0.6040(2) 0.4250(2) 0.06273(16) 0.0495(8) Uani 1 1 d . . . . .
 H43A H 0.616165 0.470576 0.024627 0.059 Uiso 1 1 calc R . . . .
 H43B H 0.570948 0.392561 0.052270 0.059 Uiso 1 1 calc R . . . .
 C44 C 0.6971(2) 0.36782(19) 0.08523(16) 0.0460(7) Uani 1 1 d . . . . .
 H44A H 0.684740 0.331347 0.128190 0.055 Uiso 1 1 calc R . . . .
 H44B H 0.731182 0.330527 0.058309 0.055 Uiso 1 1 calc R . . . .
 C45 C 0.84312(19) 0.37215(16) 0.10697(12) 0.0321(6) Uani 1 1 d . . . . .
 C46 C 0.8703(2) 0.28369(17) 0.13279(14) 0.0434(7) Uani 1 1 d . . . . .
 H46 H 0.827705 0.252949 0.135012 0.052 Uiso 1 1 calc R . . . .
 C47 C 0.9580(2) 0.24113(18) 0.15490(15) 0.0520(8) Uani 1 1 d . . . . .
 H47 H 0.976025 0.181002 0.172157 0.062 Uiso 1 1 calc R . . . .
 C48 C 1.0200(2) 0.28500(19) 0.15223(16) 0.0547(9) Uani 1 1 d . . . . .
 H48 H 1.080404 0.255231 0.167955 0.066 Uiso 1 1 calc R . . . .
 C49 C 0.9944(2) 0.37215(18) 0.12675(15) 0.0450(7) Uani 1 1 d . . . . .
 H49 H 1.037617 0.401908 0.125136 0.054 Uiso 1 1 calc R . . . .
 C50 C 0.90609(18) 0.41750(16) 0.10327(12) 0.0323(6) Uani 1 1 d . . . . .
 C51 C 0.93883(19) 0.54662(17) 0.06110(13) 0.0348(6) Uani 1 1 d . . . . .
 H51 H 1.003724 0.512782 0.066915 0.042 Uiso 1 1 calc R . . . .
 C52 C 0.29069(19) 0.86947(16) 0.66617(12) 0.0337(6) Uani 1 1 d . . . . .
 H52 H 0.269232 0.875561 0.706791 0.040 Uiso 1 1 calc R . . . .
 C53 C 0.23594(18) 0.91953(16) 0.61812(12) 0.0320(6) Uani 1 1 d . . . . .
 C54 C 0.26670(18) 0.91051(16) 0.55852(12) 0.0312(6) Uani 1 1 d . . . . .
 H54 H 0.228198 0.945108 0.525914 0.037 Uiso 1 1 calc R . . . .
 C55 C 0.35349(17) 0.85098(15) 0.54706(12) 0.0280(5) Uani 1 1 d . . . . .
 C56 C 0.40934(18) 0.79998(15) 0.59508(12) 0.0304(6) Uani 1 1 d . . . . .
 H56 H 0.468669 0.758610 0.587382 0.036 Uiso 1 1 calc R . . . .
 C57 C 0.37842(19) 0.80961(16) 0.65377(12) 0.0328(6) Uani 1 1 d . . . . .
 C58 C 0.39458(17) 0.84183(15) 0.48308(11) 0.0274(5) Uani 1 1 d . . . . .
 H58A H 0.436181 0.879661 0.462418 0.033 Uiso 1 1 calc R . . . .
 H58B H 0.436168 0.782586 0.487239 0.033 Uiso 1 1 calc R . . . .
 C59 C 0.36469(18) 0.83553(16) 0.38507(11) 0.0302(6) Uani 1 1 d . . . . .
 H59A H 0.388468 0.772641 0.396740 0.036 Uiso 1 1 calc R . . . .
 H59B H 0.421168 0.857273 0.365585 0.036 Uiso 1 1 calc R . . . .
 C60 C 0.29439(17) 0.86759(15) 0.33837(11) 0.0282(5) Uani 1 1 d . . . . .
 C61 C 0.28511(18) 0.94884(16) 0.29460(11) 0.0312(6) Uani 1 1 d . . . . .
 C62 C 0.3395(2) 1.00289(17) 0.29236(13) 0.0400(7) Uani 1 1 d . . . . .
 H62 H 0.385683 0.983225 0.320554 0.048 Uiso 1 1 calc R . . . .
 C63 C 0.3264(2) 1.08189(19) 0.25063(15) 0.0505(8) Uani 1 1 d . . . . .
 H63 H 0.363198 1.116505 0.250362 0.061 Uiso 1 1 calc R . . . .
 C64 C 0.2595(2) 1.11291(19) 0.20811(15) 0.0550(9) Uani 1 1 d . . . . .
 H64 H 0.250611 1.168560 0.179784 0.066 Uiso 1 1 calc R . . . .
 C65 C 0.2076(2) 1.0643(2) 0.20711(14) 0.0517(8) Uani 1 1 d . . . . .
 H65 H 0.163409 1.085667 0.177440 0.062 Uiso 1 1 calc R . . . .
 C66 C 0.2182(2) 0.98050(17) 0.25027(12) 0.0368(6) Uani 1 1 d . . . . .
 C67 C 0.1646(2) 0.9303(2) 0.25022(13) 0.0446(7) Uani 1 1 d . . . . .
 H67 H 0.120214 0.951823 0.220667 0.054 Uiso 1 1 calc R . . . .
 C68 C 0.1736(2) 0.84913(19) 0.29211(13) 0.0401(7) Uani 1 1 d . . . . .
 C69 C 0.1206(3) 0.7970(2) 0.29034(17) 0.0603(9) Uani 1 1 d . . . . .
 H69 H 0.077242 0.818038 0.260191 0.072 Uiso 1 1 calc R . . . .
 C70 C 0.1306(3) 0.7181(3) 0.33071(19) 0.0651(10) Uani 1 1 d . . . . .
 H70 H 0.094817 0.684047 0.328568 0.078 Uiso 1 1 calc R . . . .
 C71 C 0.1937(2) 0.6865(2) 0.37574(16) 0.0539(9) Uani 1 1 d . . . . .
 H71 H 0.199520 0.631343 0.404368 0.065 Uiso 1 1 calc R . . . .
 C72 C 0.2468(2) 0.73327(17) 0.37921(13) 0.0395(7) Uani 1 1 d . . . . .
 H72 H 0.289327 0.709996 0.410031 0.047 Uiso 1 1 calc R . . . .
 C73 C 0.23989(19) 0.81683(16) 0.33747(12) 0.0327(6) Uani 1 1 d . . . . .
 C74 C 0.1195(2) 1.0010(2) 0.68195(16) 0.0563(9) Uani 1 1 d . . . . .
 H74A H 0.059061 1.047997 0.679142 0.084 Uiso 1 1 calc GR . . . .
 H74B H 0.169746 1.017557 0.691134 0.084 Uiso 1 1 calc GR . . . .
 H74C H 0.108828 0.950789 0.715258 0.084 Uiso 1 1 calc GR . . . .
 C75 C 0.5231(2) 0.7074(2) 0.69262(16) 0.0564(9) Uani 1 1 d . . . . .
 H75A H 0.563448 0.738480 0.659638 0.085 Uiso 1 1 calc GR . . . .
 H75B H 0.516763 0.662236 0.679888 0.085 Uiso 1 1 calc GR . . . .
 H75C H 0.553507 0.682279 0.730977 0.085 Uiso 1 1 calc GR . . . .
 C76 C 0.15522(18) 0.72420(15) 0.52843(12) 0.0294(5) Uani 1 1 d . . . . .
 C77 C 0.07452(19) 0.69481(17) 0.54427(13) 0.0377(6) Uani 1 1 d . . . . .
 H77 H 0.079214 0.637621 0.568520 0.045 Uiso 1 1 calc R . . . .
 C78 C -0.01195(19) 0.74953(18) 0.52439(14) 0.0410(7) Uani 1 1 d . . . . .
 H78 H -0.067660 0.730651 0.533634 0.049 Uiso 1 1 calc R . . . .
 C79 C -0.01604(19) 0.83294(18) 0.49052(13) 0.0381(6) Uani 1 1 d . . . . .
 H79 H -0.074840 0.872305 0.476124 0.046 Uiso 1 1 calc R . . . .
 C80 C 0.06670(17) 0.85830(16) 0.47789(12) 0.0295(5) Uani 1 1 d . . . . .
 C81 C 0.05819(18) 0.94804(16) 0.44280(12) 0.0322(6) Uani 1 1 d . . . . .
 H81 H -0.004331 0.984771 0.433272 0.039 Uiso 1 1 calc R . . . .
 C82 C 0.10979(18) 1.06647(15) 0.38692(12) 0.0306(6) Uani 1 1 d . . . . .
 C83 C 0.0351(2) 1.10751(18) 0.35009(14) 0.0427(7) Uani 1 1 d . . . . .
 H83 H -0.007023 1.077793 0.349765 0.051 Uiso 1 1 calc R . . . .
 C84 C 0.0216(2) 1.1914(2) 0.31384(16) 0.0562(9) Uani 1 1 d . . . . .
 H84 H -0.029573 1.218732 0.288684 0.067 Uiso 1 1 calc R . . . .
 C85 C 0.0811(3) 1.23477(19) 0.31406(16) 0.0564(9) Uani 1 1 d . . . . .
 H85 H 0.070214 1.292695 0.289807 0.068 Uiso 1 1 calc R . . . .
 C86 C 0.1564(2) 1.19572(18) 0.34892(15) 0.0490(8) Uani 1 1 d . . . . .
 H86 H 0.197544 1.226630 0.348771 0.059 Uiso 1 1 calc R . . . .
 C87 C 0.17308(19) 1.11074(17) 0.38464(13) 0.0361(6) Uani 1 1 d . . . . .
 C88 C 0.3086(3) 1.1139(3) 0.4203(3) 0.0916(17) Uani 1 1 d . . . . .
 H88A H 0.309341 1.159615 0.380276 0.110 Uiso 1 1 calc R . . . .
 H88B H 0.278017 1.141589 0.453562 0.110 Uiso 1 1 calc R . . . .
 C89 C 0.4002(3) 1.0699(3) 0.4299(3) 0.1039(19) Uani 1 1 d . . . . .
 H89A H 0.433471 1.112150 0.424690 0.125 Uiso 1 1 calc R . . . .
 H89B H 0.398052 1.036094 0.474393 0.125 Uiso 1 1 calc R . . . .
 C90 C 0.5584(2) 0.9891(2) 0.3986(2) 0.0649(11) Uani 1 1 d . . . . .
 H90A H 0.575140 0.940406 0.436253 0.078 Uiso 1 1 calc R . . . .
 H90B H 0.580634 1.035194 0.399837 0.078 Uiso 1 1 calc R . . . .
 C91 C 0.6073(3) 0.9629(3) 0.3431(2) 0.0820(13) Uani 1 1 d . . . . .
 H91A H 0.585858 1.010023 0.305585 0.098 Uiso 1 1 calc R . . . .
 H91B H 0.678204 0.950461 0.341003 0.098 Uiso 1 1 calc R . . . .
 C92 C 0.6378(3) 0.8577(2) 0.29304(17) 0.0668(10) Uani 1 1 d . . . . .
 C93 C 0.6474(5) 0.7589(5) 0.3103(4) 0.0548(17) Uani 0.6 1 d . . P B 1
 C94 C 0.5665(3) 0.6613(2) 0.34342(15) 0.0542(9) Uani 1 1 d . . . . .
 C95 C 0.58125(19) 0.60670(16) 0.40855(13) 0.0373(6) Uani 1 1 d . . . . .
 H95A H 0.591498 0.546603 0.411995 0.045 Uiso 1 1 calc R . . . .
 H95B H 0.639240 0.610519 0.419973 0.045 Uiso 1 1 calc R . . . .
 C96 C 0.49996(18) 0.59818(15) 0.51207(12) 0.0297(5) Uani 1 1 d . . . . .
 C97 C 0.5822(2) 0.54099(17) 0.53868(14) 0.0387(6) Uani 1 1 d . . . . .
 H97 H 0.640688 0.523692 0.512751 0.046 Uiso 1 1 calc R . . . .
 C98 C 0.5792(2) 0.50929(18) 0.60261(14) 0.0428(7) Uani 1 1 d . . . . .
 H98 H 0.635902 0.470662 0.620311 0.051 Uiso 1 1 calc R . . . .
 C99 C 0.4952(2) 0.53299(17) 0.64090(14) 0.0418(7) Uani 1 1 d . . . . .
 H99 H 0.493927 0.511601 0.684841 0.050 Uiso 1 1 calc R . . . .
 C100 C 0.4126(2) 0.58819(16) 0.61497(12) 0.0343(6) Uani 1 1 d . . . . .
 H100 H 0.354428 0.604333 0.641473 0.041 Uiso 1 1 calc R . . . .
 C101 C 0.41303(18) 0.62049(14) 0.55091(12) 0.0283(5) Uani 1 1 d . . . . .
 C102 C 0.24881(18) 0.66399(15) 0.54760(12) 0.0297(6) Uani 1 1 d . . . . .
 H102 H 0.249118 0.611226 0.578477 0.036 Uiso 1 1 calc R . . . .
 C103 C 0.2591(3) 0.7158(2) 0.05513(17) 0.0562(9) Uani 1 1 d . . . . .
 C104 C 0.3261(3) 0.7632(3) 0.0422(2) 0.0698(10) Uani 1 1 d . . . . .
 H10A H 0.370123 0.756538 0.004207 0.105 Uiso 1 1 calc GR . . . .
 H10B H 0.363708 0.742029 0.077127 0.105 Uiso 1 1 calc GR . . . .
 H10C H 0.290380 0.823477 0.036390 0.105 Uiso 1 1 calc GR . . . .
 C105 C 0.1113(3) 0.9367(2) 0.07991(19) 0.0635(10) Uani 1 1 d . . . . .
 C106 C 0.0502(3) 0.8976(3) 0.0661(3) 0.1039(17) Uani 1 1 d . . . . .
 H10D H 0.071558 0.892196 0.023973 0.156 Uiso 1 1 calc GR . . . .
 H10E H -0.017403 0.933352 0.068996 0.156 Uiso 1 1 calc GR . . . .
 H10F H 0.055432 0.841164 0.096204 0.156 Uiso 1 1 calc GR . . . .
 C107 C 0.8753(3) 0.5603(3) 0.4320(3) 0.0870(14) Uani 1 1 d . . . . .
 C108 C 0.9430(4) 0.6008(3) 0.4359(3) 0.122(2) Uani 1 1 d . . . . .
 H10G H 0.937709 0.654165 0.401943 0.183 Uiso 1 1 calc GR . . . .
 H10H H 1.009328 0.562744 0.432286 0.183 Uiso 1 1 calc GR . . . .
 H10I H 0.927573 0.612756 0.475930 0.183 Uiso 1 1 calc GR . . . .
 C109 C 0.7377(3) 0.7758(3) 0.4581(2) 0.0680(10) Uani 1 1 d . . . . .
 C110 C 0.6685(3) 0.7299(3) 0.4838(2) 0.0750(11) Uani 1 1 d . . . . .
 H11A H 0.625696 0.743915 0.452828 0.112 Uiso 1 1 calc GR . . . .
 H11B H 0.629901 0.745489 0.520805 0.112 Uiso 1 1 calc GR . . . .
 H11C H 0.702178 0.668735 0.495361 0.112 Uiso 1 1 calc GR . . . .
 O13 O 0.5556(3) 0.7443(2) 0.32612(17) 0.0419(8) Uani 0.6 1 d . . P B 1
 O13A O 0.6025(4) 0.7364(3) 0.3487(3) 0.0351(12) Uani 0.4 1 d . . P B 2
 C93A C 0.6012(7) 0.8018(6) 0.2904(4) 0.046(2) Uani 0.4 1 d . . P B 2
 F12A F 0.8895(10) 0.6021(6) 0.6714(6) 0.080(3) Uani 0.3 1 d . . P A 2
 F9A F 0.7491(6) 0.5657(7) 0.6976(4) 0.119(4) Uani 0.4 1 d . . P A 2
 F7A F 0.9128(10) 0.5772(11) 0.5905(6) 0.155(6) Uani 0.5 1 d . . P A 2
 F11A F 0.7935(11) 0.5320(8) 0.6068(6) 0.145(6) Uani 0.5 1 d . . P A 2

loop_
  _atom_site_aniso_label
  _atom_site_aniso_U_11
  _atom_site_aniso_U_22
  _atom_site_aniso_U_33
  _atom_site_aniso_U_23
  _atom_site_aniso_U_13
  _atom_site_aniso_U_12
 P1 0.0550(5) 0.0507(5) 0.0505(5) -0.0199(4) -0.0002(4) -0.0191(4)
 P2 0.0627(6) 0.0435(4) 0.0445(5) -0.0115(4) -0.0005(4) -0.0268(4)
 F1 0.0900(17) 0.129(2) 0.115(2) -0.0833(18) -0.0001(15) -0.0399(16)
 F2 0.147(3) 0.104(2) 0.0794(19) -0.0144(16) -0.0334(18) 0.0287(19)
 F3 0.161(3) 0.0861(16) 0.0604(14) -0.0355(13) -0.0049(15) -0.0437(17)
 F4 0.128(2) 0.0804(17) 0.113(2) -0.0172(16) -0.0455(19) 0.0080(16)
 F5 0.095(2) 0.131(2) 0.143(3) -0.056(2) 0.0451(18) -0.0630(18)
 F6 0.110(2) 0.137(2) 0.127(2) -0.063(2) 0.0364(18) -0.0842(19)
 F7 0.168(9) 0.116(7) 0.079(5) -0.075(5) 0.025(5) -0.034(6)
 F8 0.136(2) 0.0681(14) 0.0890(18) 0.0046(13) -0.0497(17) -0.0296(15)
 F9 0.228(6) 0.060(2) 0.056(2) -0.0168(18) -0.038(3) -0.039(4)
 F10 0.203(3) 0.0459(13) 0.142(3) 0.0033(15) -0.077(3) -0.0293(17)
 F11 0.059(3) 0.103(4) 0.202(8) -0.062(5) 0.015(4) -0.043(3)
 F12 0.043(4) 0.117(7) 0.274(19) -0.050(12) -0.005(8) -0.046(4)
 O1 0.0263(10) 0.0518(11) 0.0348(10) -0.0191(9) -0.0011(8) -0.0030(8)
 O2 0.0471(12) 0.0389(10) 0.0334(10) -0.0076(8) -0.0162(9) -0.0053(9)
 O3 0.0312(10) 0.0353(10) 0.0422(11) -0.0068(9) 0.0053(8) -0.0041(8)
 O4 0.0653(14) 0.0400(11) 0.0424(12) -0.0130(9) 0.0016(10) -0.0217(10)
 O5 0.0476(13) 0.0736(15) 0.0691(15) -0.0423(13) 0.0214(11) -0.0407(12)
 O6 0.0358(12) 0.0727(15) 0.0874(18) -0.0525(14) -0.0118(11) -0.0091(11)
 O7 0.0293(10) 0.0339(9) 0.0450(11) -0.0137(8) -0.0034(8) -0.0109(8)
 O8 0.0289(10) 0.0584(12) 0.0447(12) -0.0267(10) -0.0030(9) -0.0028(9)
 O9 0.0560(13) 0.0440(11) 0.0387(11) -0.0086(9) -0.0226(10) -0.0068(10)
 O10 0.0320(11) 0.0478(11) 0.0617(14) -0.0242(10) -0.0097(10) -0.0115(9)
 O11 0.0354(12) 0.0623(14) 0.108(2) -0.0441(15) -0.0072(12) -0.0148(11)
 O12 0.0543(14) 0.0761(16) 0.0707(16) -0.0353(13) 0.0169(12) -0.0415(13)
 O14 0.0291(10) 0.0329(9) 0.0323(10) -0.0080(8) 0.0002(8) -0.0037(7)
 N1 0.0208(10) 0.0276(10) 0.0248(10) -0.0087(8) 0.0002(8) -0.0076(8)
 N2 0.0250(11) 0.0301(10) 0.0267(11) -0.0104(9) 0.0004(9) -0.0086(9)
 N3 0.0276(11) 0.0267(10) 0.0318(12) -0.0092(9) -0.0018(9) -0.0066(9)
 N4 0.0253(11) 0.0301(10) 0.0289(11) -0.0097(9) -0.0033(9) -0.0056(9)
 N5 0.0202(10) 0.0252(10) 0.0250(10) -0.0056(8) -0.0022(8) -0.0058(8)
 N6 0.0239(11) 0.0288(10) 0.0260(11) -0.0082(9) -0.0015(8) -0.0068(8)
 N7 0.0252(11) 0.0261(10) 0.0315(11) -0.0085(9) -0.0070(9) -0.0040(8)
 N8 0.0268(11) 0.0245(10) 0.0296(11) -0.0069(9) -0.0029(9) -0.0049(8)
 N9 0.089(3) 0.084(3) 0.138(4) -0.002(2) -0.053(3) -0.042(2)
 N10 0.060(2) 0.082(2) 0.079(2) -0.0233(19) -0.0055(18) -0.0166(18)
 N11 0.054(2) 0.110(3) 0.210(6) -0.076(4) -0.012(3) -0.007(2)
 N12 0.087(3) 0.103(3) 0.142(4) -0.006(3) -0.042(3) -0.041(3)
 C1 0.0226(13) 0.0369(13) 0.0314(14) -0.0133(11) -0.0003(10) -0.0124(10)
 C2 0.0334(14) 0.0369(13) 0.0275(13) -0.0111(11) -0.0022(11) -0.0165(11)
 C3 0.0342(14) 0.0288(12) 0.0294(13) -0.0050(10) -0.0096(11) -0.0133(11)
 C4 0.0277(13) 0.0279(12) 0.0343(14) -0.0109(11) -0.0069(11) -0.0085(10)
 C5 0.0235(12) 0.0312(12) 0.0286(13) -0.0107(10) -0.0029(10) -0.0117(10)
 C6 0.0254(13) 0.0343(13) 0.0296(13) -0.0086(11) -0.0053(10) -0.0093(10)
 C7 0.0219(12) 0.0331(13) 0.0322(14) -0.0104(11) -0.0042(10) -0.0100(10)
 C8 0.0244(13) 0.0394(14) 0.0249(13) -0.0119(11) 0.0017(10) -0.0066(11)
 C9 0.0249(13) 0.0378(14) 0.0224(12) -0.0112(11) 0.0011(10) -0.0050(11)
 C10 0.0264(13) 0.0398(14) 0.0234(13) -0.0128(11) 0.0020(10) -0.0060(11)
 C11 0.0371(15) 0.0465(16) 0.0302(14) -0.0154(12) 0.0033(12) -0.0134(13)
 C12 0.0511(18) 0.0446(16) 0.0382(16) -0.0157(13) 0.0087(14) -0.0203(14)
 C13 0.0545(19) 0.0371(15) 0.0400(17) -0.0071(13) 0.0034(14) -0.0095(14)
 C14 0.0374(16) 0.0446(16) 0.0336(15) -0.0063(13) -0.0016(12) 0.0004(13)
 C15 0.0319(14) 0.0415(15) 0.0264(14) -0.0107(11) 0.0000(11) -0.0045(12)
 C16 0.0319(15) 0.0531(17) 0.0311(15) -0.0115(13) -0.0089(12) -0.0043(13)
 C17 0.0321(15) 0.0489(16) 0.0310(14) -0.0177(13) 0.0003(11) -0.0099(12)
 C18 0.0437(18) 0.068(2) 0.0469(19) -0.0215(16) -0.0075(14) -0.0206(16)
 C19 0.056(2) 0.068(2) 0.056(2) -0.0236(18) -0.0006(17) -0.0328(18)
 C20 0.063(2) 0.0482(17) 0.0426(18) -0.0143(14) 0.0018(16) -0.0226(16)
 C21 0.0446(17) 0.0434(15) 0.0284(14) -0.0125(12) 0.0009(12) -0.0127(13)
 C22 0.0289(13) 0.0408(14) 0.0236(13) -0.0142(11) 0.0041(10) -0.0073(11)
 C23 0.0360(16) 0.070(2) 0.0434(18) -0.0316(16) 0.0031(13) -0.0075(15)
 C24 0.0492(18) 0.0443(16) 0.0471(18) -0.0124(14) -0.0256(15) 0.0009(14)
 C25 0.0234(13) 0.0354(13) 0.0315(14) -0.0107(11) -0.0026(10) -0.0088(10)
 C26 0.0273(14) 0.0438(15) 0.0441(17) -0.0113(13) -0.0056(12) -0.0117(12)
 C27 0.0318(15) 0.0500(17) 0.0524(18) -0.0149(14) -0.0007(13) -0.0236(13)
 C28 0.0383(16) 0.0362(14) 0.0450(17) -0.0104(13) 0.0042(13) -0.0184(12)
 C29 0.0294(13) 0.0326(13) 0.0268(13) -0.0093(10) 0.0025(10) -0.0127(11)
 C30 0.0365(15) 0.0272(12) 0.0306(14) -0.0067(11) -0.0021(11) -0.0111(11)
 C31 0.0316(14) 0.0235(12) 0.0402(15) -0.0077(11) -0.0072(12) -0.0095(10)
 C32 0.0484(18) 0.0350(14) 0.0435(17) -0.0112(13) -0.0136(14) -0.0112(13)
 C33 0.065(2) 0.0384(16) 0.056(2) -0.0079(15) -0.0331(18) -0.0124(15)
 C34 0.0436(19) 0.0356(15) 0.080(3) -0.0124(16) -0.0306(18) -0.0058(13)
 C35 0.0313(15) 0.0305(14) 0.072(2) -0.0144(15) -0.0086(15) -0.0077(12)
 C36 0.0308(14) 0.0246(12) 0.0486(17) -0.0088(12) -0.0058(12) -0.0094(11)
 C37 0.0428(17) 0.0384(15) 0.058(2) -0.0202(14) 0.0179(15) -0.0113(13)
 C38 0.0432(17) 0.0434(16) 0.0486(18) -0.0247(14) 0.0149(14) -0.0171(13)
 C39 0.058(2) 0.0488(17) 0.0375(17) -0.0125(14) 0.0075(14) -0.0199(15)
 C40 0.0355(16) 0.0461(16) 0.0437(17) -0.0111(14) 0.0057(13) -0.0154(13)
 C41 0.0400(17) 0.0463(16) 0.061(2) -0.0182(15) 0.0002(15) -0.0255(14)
 C42 0.060(2) 0.061(2) 0.079(3) -0.0197(19) -0.019(2) -0.0270(18)
 C43 0.0435(18) 0.0554(18) 0.066(2) -0.0299(17) -0.0050(16) -0.0235(15)
 C44 0.0422(17) 0.0435(16) 0.063(2) -0.0276(15) 0.0000(15) -0.0181(13)
 C45 0.0317(14) 0.0326(13) 0.0296(14) -0.0120(11) 0.0012(11) -0.0072(11)
 C46 0.0462(18) 0.0329(14) 0.0477(18) -0.0128(13) 0.0025(14) -0.0125(13)
 C47 0.055(2) 0.0291(14) 0.053(2) -0.0038(14) -0.0036(16) -0.0009(14)
 C48 0.0470(19) 0.0408(17) 0.063(2) -0.0051(15) -0.0200(16) 0.0010(14)
 C49 0.0379(16) 0.0385(15) 0.0542(19) -0.0073(14) -0.0162(14) -0.0060(13)
 C50 0.0281(14) 0.0310(13) 0.0323(14) -0.0099(11) -0.0039(11) -0.0019(11)
 C51 0.0233(13) 0.0379(14) 0.0394(15) -0.0105(12) -0.0064(11) -0.0040(11)
 C52 0.0365(15) 0.0399(14) 0.0311(14) -0.0126(12) -0.0034(12) -0.0174(12)
 C53 0.0237(13) 0.0371(14) 0.0390(15) -0.0145(12) -0.0022(11) -0.0115(11)
 C54 0.0247(13) 0.0376(14) 0.0323(14) -0.0089(11) -0.0073(11) -0.0095(11)
 C55 0.0257(13) 0.0302(12) 0.0322(14) -0.0091(10) -0.0062(11) -0.0115(10)
 C56 0.0291(13) 0.0272(12) 0.0376(15) -0.0098(11) -0.0095(11) -0.0080(10)
 C57 0.0395(15) 0.0299(13) 0.0326(14) -0.0037(11) -0.0146(12) -0.0136(11)
 C58 0.0195(12) 0.0298(12) 0.0334(14) -0.0095(11) -0.0047(10) -0.0067(10)
 C59 0.0257(13) 0.0349(13) 0.0261(13) -0.0112(11) 0.0010(10) -0.0050(10)
 C60 0.0261(13) 0.0319(13) 0.0230(12) -0.0123(10) 0.0023(10) -0.0039(10)
 C61 0.0313(14) 0.0346(13) 0.0248(13) -0.0131(11) 0.0038(11) -0.0069(11)
 C62 0.0440(17) 0.0398(15) 0.0340(15) -0.0119(12) 0.0030(12) -0.0141(13)
 C63 0.057(2) 0.0394(16) 0.0505(19) -0.0161(14) 0.0140(16) -0.0196(15)
 C64 0.056(2) 0.0350(15) 0.0476(19) -0.0001(14) 0.0089(16) -0.0047(15)
 C65 0.0502(19) 0.0475(17) 0.0336(16) 0.0016(14) -0.0043(14) -0.0009(15)
 C66 0.0348(15) 0.0400(14) 0.0264(14) -0.0093(12) -0.0016(11) -0.0023(12)
 C67 0.0380(16) 0.0609(19) 0.0333(16) -0.0145(14) -0.0108(13) -0.0083(14)
 C68 0.0374(16) 0.0540(17) 0.0341(15) -0.0204(13) 0.0005(12) -0.0159(13)
 C69 0.054(2) 0.083(3) 0.059(2) -0.030(2) -0.0062(17) -0.0309(19)
 C70 0.060(2) 0.077(3) 0.081(3) -0.039(2) 0.009(2) -0.044(2)
 C71 0.057(2) 0.0470(17) 0.058(2) -0.0232(16) 0.0180(17) -0.0248(16)
 C72 0.0422(16) 0.0375(14) 0.0351(15) -0.0152(12) 0.0075(12) -0.0110(12)
 C73 0.0324(14) 0.0367(14) 0.0281(14) -0.0161(11) 0.0051(11) -0.0086(11)
 C74 0.0373(17) 0.082(2) 0.059(2) -0.0451(19) 0.0026(15) -0.0104(16)
 C75 0.068(2) 0.0458(17) 0.057(2) -0.0165(16) -0.0392(18) 0.0035(16)
 C76 0.0272(13) 0.0302(12) 0.0292(13) -0.0080(10) -0.0003(10) -0.0095(10)
 C77 0.0341(15) 0.0369(14) 0.0387(16) -0.0066(12) 0.0005(12) -0.0144(12)
 C78 0.0262(14) 0.0467(16) 0.0505(18) -0.0107(14) -0.0010(13) -0.0174(12)
 C79 0.0218(13) 0.0420(15) 0.0466(17) -0.0103(13) -0.0049(12) -0.0077(11)
 C80 0.0229(13) 0.0342(13) 0.0297(13) -0.0098(11) -0.0024(10) -0.0066(10)
 C81 0.0236(13) 0.0321(13) 0.0355(14) -0.0084(11) -0.0066(11) -0.0017(11)
 C82 0.0256(13) 0.0266(12) 0.0333(14) -0.0084(11) -0.0020(11) -0.0018(10)
 C83 0.0350(16) 0.0375(15) 0.0498(18) -0.0043(13) -0.0131(13) -0.0075(12)
 C84 0.050(2) 0.0414(17) 0.059(2) 0.0010(15) -0.0173(16) -0.0011(15)
 C85 0.063(2) 0.0299(15) 0.057(2) 0.0001(14) -0.0025(17) -0.0072(15)
 C86 0.0526(19) 0.0390(16) 0.056(2) -0.0163(15) 0.0069(16) -0.0203(14)
 C87 0.0292(14) 0.0349(14) 0.0451(16) -0.0186(12) 0.0004(12) -0.0073(11)
 C88 0.046(2) 0.083(3) 0.187(5) -0.091(3) -0.027(3) -0.008(2)
 C89 0.046(2) 0.103(3) 0.216(6) -0.116(4) -0.003(3) -0.024(2)
 C90 0.0393(19) 0.0520(19) 0.114(3) -0.028(2) -0.013(2) -0.0195(15)
 C91 0.071(3) 0.065(2) 0.112(4) -0.031(2) 0.030(2) -0.044(2)
 C92 0.072(2) 0.060(2) 0.055(2) -0.0180(18) 0.0234(18) -0.0235(19)
 C93 0.049(4) 0.053(4) 0.066(5) -0.030(4) 0.029(4) -0.030(3)
 C94 0.067(2) 0.0435(17) 0.0397(17) -0.0136(14) 0.0125(15) -0.0126(15)
 C95 0.0334(15) 0.0327(14) 0.0427(16) -0.0158(12) 0.0015(12) -0.0055(11)
 C96 0.0308(14) 0.0233(11) 0.0351(14) -0.0077(10) -0.0056(11) -0.0084(10)
 C97 0.0296(15) 0.0351(14) 0.0484(18) -0.0129(13) -0.0058(12) -0.0050(11)
 C98 0.0367(16) 0.0380(15) 0.0493(18) -0.0081(13) -0.0163(14) -0.0038(12)
 C99 0.0462(17) 0.0372(15) 0.0380(16) -0.0051(12) -0.0143(13) -0.0079(13)
 C100 0.0358(15) 0.0309(13) 0.0342(15) -0.0088(11) -0.0055(12) -0.0077(11)
 C101 0.0293(13) 0.0213(11) 0.0332(14) -0.0060(10) -0.0059(11) -0.0072(10)
 C102 0.0315(14) 0.0254(12) 0.0277(13) -0.0025(10) -0.0025(11) -0.0095(10)
 C103 0.048(2) 0.0530(19) 0.069(2) -0.0173(17) -0.0240(18) -0.0081(16)
 C104 0.057(2) 0.077(3) 0.083(3) -0.023(2) -0.017(2) -0.024(2)
 C105 0.050(2) 0.058(2) 0.070(3) -0.0218(19) 0.0074(19) -0.0075(18)
 C106 0.072(3) 0.089(3) 0.162(5) -0.070(4) 0.008(3) -0.020(3)
 C107 0.051(3) 0.071(3) 0.119(4) -0.033(3) 0.009(3) -0.003(2)
 C108 0.086(4) 0.088(3) 0.183(6) -0.058(4) 0.029(4) -0.027(3)
 C109 0.052(2) 0.069(2) 0.086(3) -0.026(2) -0.023(2) -0.0086(19)
 C110 0.055(2) 0.092(3) 0.089(3) -0.037(2) -0.011(2) -0.023(2)
 O13 0.041(2) 0.0401(19) 0.038(2) -0.0136(16) 0.0083(17) -0.0114(17)
 O13A 0.040(3) 0.038(3) 0.037(3) -0.011(2) -0.007(3) -0.020(2)
 C93A 0.060(6) 0.040(5) 0.033(4) -0.013(4) 0.014(4) -0.020(4)
 F12A 0.103(8) 0.057(5) 0.099(8) -0.020(5) -0.053(7) -0.025(6)
 F9A 0.074(6) 0.138(8) 0.088(6) -0.001(6) 0.045(4) -0.033(5)
 F7A 0.149(12) 0.119(7) 0.142(9) -0.017(7) 0.078(8) -0.060(8)
 F11A 0.237(14) 0.117(8) 0.154(11) -0.008(7) -0.107(10) -0.115(10)

_geom_special_details
;
 All esds (except the esd in the dihedral angle between two l.s. planes)
 are estimated using the full covariance matrix.  The cell esds are taken
 into account individually in the estimation of esds in distances, angles
 and torsion angles; correlations between esds in cell parameters are only
 used when they are defined by crystal symmetry.  An approximate (isotropic)
 treatment of cell esds is used for estimating esds involving l.s. planes.
;
loop_
  _geom_bond_atom_site_label_1
  _geom_bond_atom_site_label_2
  _geom_bond_distance
  _geom_bond_site_symmetry_2
  _geom_bond_publ_flag
 P1 F1 1.583(2) . ?
 P1 F2 1.563(3) . ?
 P1 F3 1.572(2) . ?
 P1 F4 1.571(3) . ?
 P1 F5 1.562(3) . ?
 P1 F6 1.569(3) . ?
 P2 F7 1.560(9) . ?
 P2 F8 1.576(2) . ?
 P2 F9 1.557(4) . ?
 P2 F10 1.566(3) . ?
 P2 F11 1.616(5) . ?
 P2 F12 1.488(8) . ?
 P2 F12A 1.623(8) . ?
 P2 F9A 1.459(7) . ?
 P2 F7A 1.587(11) . ?
 P2 F11A 1.478(8) . ?
 O1 C1 1.370(3) . ?
 O1 C23 1.432(3) . ?
 O2 C3 1.366(3) . ?
 O2 C24 1.430(3) . ?
 O3 C36 1.361(3) . ?
 O3 C37 1.432(3) . ?
 O4 C38 1.425(3) . ?
 O4 C39 1.399(3) . ?
 O5 C40 1.406(3) . ?
 O5 C41 1.412(3) . ?
 O6 C42 1.385(4) . ?
 O6 C43 1.416(4) . ?
 O7 C44 1.443(3) . ?
 O7 C45 1.367(3) . ?
 O8 C53 1.367(3) . ?
 O8 C74 1.435(3) . ?
 O9 C57 1.364(3) . ?
 O9 C75 1.432(4) . ?
 O10 C87 1.363(3) . ?
 O10 C88 1.437(4) . ?
 O11 C89 1.320(4) . ?
 O11 C90 1.391(4) . ?
 O12 C91 1.411(4) . ?
 O12 C92 1.423(4) . ?
 O14 C95 1.433(3) . ?
 O14 C96 1.365(3) . ?
 N1 C7 1.480(3) . ?
 N1 C8 1.501(3) . ?
 N2 C25 1.339(3) . ?
 N2 C29 1.345(3) . ?
 N3 C30 1.272(3) . ?
 N3 C31 1.418(3) . ?
 N4 C50 1.427(3) . ?
 N4 C51 1.264(3) . ?
 N5 C58 1.484(3) . ?
 N5 C59 1.503(3) . ?
 N6 C76 1.343(3) . ?
 N6 C80 1.342(3) . ?
 N7 C81 1.272(3) . ?
 N7 C82 1.423(3) . ?
 N8 C101 1.419(3) . ?
 N8 C102 1.270(3) . ?
 N9 C103 1.118(4) . ?
 N10 C105 1.129(5) . ?
 N11 C107 1.110(6) . ?
 N12 C109 1.136(5) . ?
 C1 C2 1.376(4) . ?
 C1 C6 1.394(4) . ?
 C2 C3 1.397(4) . ?
 C3 C4 1.382(4) . ?
 C4 C5 1.397(3) . ?
 C5 C6 1.383(3) . ?
 C5 C7 1.510(3) . ?
 C8 C9 1.508(3) . ?
 C9 C10 1.417(4) . ?
 C9 C22 1.407(4) . ?
 C10 C11 1.436(4) . ?
 C10 C15 1.433(4) . ?
 C11 C12 1.356(4) . ?
 C12 C13 1.410(4) . ?
 C13 C14 1.347(4) . ?
 C14 C15 1.429(4) . ?
 C15 C16 1.388(4) . ?
 C16 C17 1.387(4) . ?
 C17 C18 1.430(4) . ?
 C17 C22 1.438(4) . ?
 C18 C19 1.353(5) . ?
 C19 C20 1.409(5) . ?
 C20 C21 1.352(4) . ?
 C21 C22 1.437(4) . ?
 C25 C26 1.397(4) . ?
 C25 C51 1.476(4) . ?
 C26 C27 1.375(4) . ?
 C27 C28 1.374(4) . ?
 C28 C29 1.391(4) . ?
 C29 C30 1.469(4) . ?
 C31 C32 1.395(4) . ?
 C31 C36 1.392(4) . ?
 C32 C33 1.383(4) . ?
 C33 C34 1.372(5) . ?
 C34 C35 1.370(5) . ?
 C35 C36 1.394(4) . ?
 C37 C38 1.493(4) . ?
 C39 C40 1.482(4) . ?
 C41 C42 1.468(5) . ?
 C43 C44 1.479(4) . ?
 C45 C46 1.399(4) . ?
 C45 C50 1.401(4) . ?
 C46 C47 1.371(4) . ?
 C47 C48 1.375(5) . ?
 C48 C49 1.378(4) . ?
 C49 C50 1.395(4) . ?
 C52 C53 1.381(4) . ?
 C52 C57 1.399(4) . ?
 C53 C54 1.394(4) . ?
 C54 C55 1.382(3) . ?
 C55 C56 1.392(3) . ?
 C55 C58 1.504(3) . ?
 C56 C57 1.377(4) . ?
 C59 C60 1.506(3) . ?
 C60 C61 1.412(3) . ?
 C60 C73 1.410(4) . ?
 C61 C62 1.432(4) . ?
 C61 C66 1.430(4) . ?
 C62 C63 1.361(4) . ?
 C63 C64 1.399(5) . ?
 C64 C65 1.349(5) . ?
 C65 C66 1.437(4) . ?
 C66 C67 1.383(4) . ?
 C67 C68 1.395(4) . ?
 C68 C69 1.421(4) . ?
 C68 C73 1.439(4) . ?
 C69 C70 1.352(5) . ?
 C70 C71 1.402(5) . ?
 C71 C72 1.357(4) . ?
 C72 C73 1.429(4) . ?
 C76 C77 1.392(4) . ?
 C76 C102 1.475(3) . ?
 C77 C78 1.373(4) . ?
 C78 C79 1.385(4) . ?
 C79 C80 1.387(4) . ?
 C80 C81 1.473(4) . ?
 C82 C83 1.389(4) . ?
 C82 C87 1.400(4) . ?
 C83 C84 1.385(4) . ?
 C84 C85 1.360(5) . ?
 C85 C86 1.369(5) . ?
 C86 C87 1.394(4) . ?
 C88 C89 1.335(5) . ?
 C90 C91 1.459(6) . ?
 C92 C93 1.601(7) . ?
 C92 C93A 1.306(9) . ?
 C93 O13 1.416(7) . ?
 C94 C95 1.493(4) . ?
 C94 O13 1.330(4) . ?
 C94 O13A 1.640(6) . ?
 C96 C97 1.392(4) . ?
 C96 C101 1.404(4) . ?
 C97 C98 1.381(4) . ?
 C98 C99 1.373(4) . ?
 C99 C100 1.381(4) . ?
 C100 C101 1.388(4) . ?
 C103 C104 1.431(5) . ?
 C105 C106 1.461(6) . ?
 C107 C108 1.458(7) . ?
 C109 C110 1.422(6) . ?
 O13A C93A 1.430(10) . ?

loop_
  _geom_angle_atom_site_label_1
  _geom_angle_atom_site_label_2
  _geom_angle_atom_site_label_3
  _geom_angle
  _geom_angle_site_symmetry_1
  _geom_angle_site_symmetry_3
  _geom_angle_publ_flag
 F2 P1 F1 91.28(17) . . ?
 F2 P1 F3 88.34(16) . . ?
 F2 P1 F4 179.6(2) . . ?
 F2 P1 F6 89.41(19) . . ?
 F3 P1 F1 179.48(17) . . ?
 F4 P1 F1 88.69(16) . . ?
 F4 P1 F3 91.69(16) . . ?
 F5 P1 F1 89.95(16) . . ?
 F5 P1 F2 89.71(19) . . ?
 F5 P1 F3 89.69(17) . . ?
 F5 P1 F4 90.70(19) . . ?
 F5 P1 F6 178.33(18) . . ?
 F6 P1 F1 88.65(15) . . ?
 F6 P1 F3 91.70(16) . . ?
 F6 P1 F4 90.18(18) . . ?
 F7 P2 F8 93.6(6) . . ?
 F7 P2 F10 87.4(6) . . ?
 F7 P2 F11 86.7(5) . . ?
 F8 P2 F11 85.1(3) . . ?
 F8 P2 F12A 91.8(3) . . ?
 F8 P2 F7A 80.8(6) . . ?
 F9 P2 F7 176.0(6) . . ?
 F9 P2 F8 83.81(19) . . ?
 F9 P2 F10 95.3(2) . . ?
 F9 P2 F11 89.9(4) . . ?
 F10 P2 F8 177.79(17) . . ?
 F10 P2 F11 96.9(3) . . ?
 F10 P2 F12A 86.3(3) . . ?
 F10 P2 F7A 97.8(6) . . ?
 F12 P2 F7 93.4(7) . . ?
 F12 P2 F8 93.1(6) . . ?
 F12 P2 F9 89.8(6) . . ?
 F12 P2 F10 84.9(6) . . ?
 F12 P2 F11 178.2(7) . . ?
 F9A P2 F8 101.7(4) . . ?
 F9A P2 F10 79.5(4) . . ?
 F9A P2 F12A 95.3(7) . . ?
 F9A P2 F7A 172.0(7) . . ?
 F9A P2 F11A 101.3(7) . . ?
 F7A P2 F12A 77.0(7) . . ?
 F11A P2 F8 92.9(5) . . ?
 F11A P2 F10 88.7(5) . . ?
 F11A P2 F12A 161.5(8) . . ?
 F11A P2 F7A 86.1(8) . . ?
 C1 O1 C23 117.9(2) . . ?
 C3 O2 C24 117.5(2) . . ?
 C36 O3 C37 118.8(2) . . ?
 C39 O4 C38 113.3(2) . . ?
 C40 O5 C41 112.4(2) . . ?
 C42 O6 C43 115.6(3) . . ?
 C45 O7 C44 115.3(2) . . ?
 C53 O8 C74 117.9(2) . . ?
 C57 O9 C75 117.5(2) . . ?
 C87 O10 C88 116.2(3) . . ?
 C89 O11 C90 122.1(3) . . ?
 C91 O12 C92 114.0(3) . . ?
 C96 O14 C95 117.50(19) . . ?
 C7 N1 C8 111.97(18) . . ?
 C25 N2 C29 117.7(2) . . ?
 C30 N3 C31 117.9(2) . . ?
 C51 N4 C50 118.2(2) . . ?
 C58 N5 C59 110.93(18) . . ?
 C80 N6 C76 117.2(2) . . ?
 C81 N7 C82 118.3(2) . . ?
 C102 N8 C101 117.2(2) . . ?
 O1 C1 C2 124.5(2) . . ?
 O1 C1 C6 114.2(2) . . ?
 C2 C1 C6 121.3(2) . . ?
 C1 C2 C3 118.5(2) . . ?
 O2 C3 C2 114.7(2) . . ?
 O2 C3 C4 123.9(2) . . ?
 C4 C3 C2 121.3(2) . . ?
 C3 C4 C5 119.3(2) . . ?
 C4 C5 C7 118.1(2) . . ?
 C6 C5 C4 120.1(2) . . ?
 C6 C5 C7 121.6(2) . . ?
 C5 C6 C1 119.5(2) . . ?
 N1 C7 C5 113.28(19) . . ?
 N1 C8 C9 110.92(19) . . ?
 C10 C9 C8 118.7(2) . . ?
 C22 C9 C8 121.1(2) . . ?
 C22 C9 C10 120.2(2) . . ?
 C9 C10 C11 123.1(2) . . ?
 C9 C10 C15 119.9(2) . . ?
 C15 C10 C11 117.0(2) . . ?
 C12 C11 C10 121.3(3) . . ?
 C11 C12 C13 121.1(3) . . ?
 C14 C13 C12 120.0(3) . . ?
 C13 C14 C15 121.3(3) . . ?
 C14 C15 C10 119.2(3) . . ?
 C16 C15 C10 118.9(2) . . ?
 C16 C15 C14 121.9(3) . . ?
 C17 C16 C15 122.3(3) . . ?
 C16 C17 C18 121.3(3) . . ?
 C16 C17 C22 119.4(3) . . ?
 C18 C17 C22 119.2(3) . . ?
 C19 C18 C17 121.1(3) . . ?
 C18 C19 C20 119.8(3) . . ?
 C21 C20 C19 121.5(3) . . ?
 C20 C21 C22 121.2(3) . . ?
 C9 C22 C17 119.3(2) . . ?
 C9 C22 C21 123.7(2) . . ?
 C21 C22 C17 117.0(3) . . ?
 N2 C25 C26 122.5(2) . . ?
 N2 C25 C51 120.8(2) . . ?
 C26 C25 C51 116.7(2) . . ?
 C27 C26 C25 119.2(3) . . ?
 C28 C27 C26 118.6(3) . . ?
 C27 C28 C29 119.4(3) . . ?
 N2 C29 C28 122.5(2) . . ?
 N2 C29 C30 118.8(2) . . ?
 C28 C29 C30 118.7(2) . . ?
 N3 C30 C29 123.1(2) . . ?
 C32 C31 N3 121.3(2) . . ?
 C36 C31 N3 119.5(2) . . ?
 C36 C31 C32 119.0(2) . . ?
 C33 C32 C31 120.9(3) . . ?
 C34 C33 C32 119.3(3) . . ?
 C35 C34 C33 121.1(3) . . ?
 C34 C35 C36 120.3(3) . . ?
 O3 C36 C31 116.3(2) . . ?
 O3 C36 C35 124.2(3) . . ?
 C31 C36 C35 119.4(3) . . ?
 O3 C37 C38 108.2(2) . . ?
 O4 C38 C37 105.9(3) . . ?
 O4 C39 C40 109.2(3) . . ?
 O5 C40 C39 109.7(2) . . ?
 O5 C41 C42 110.2(2) . . ?
 O6 C42 C41 110.6(3) . . ?
 O6 C43 C44 109.5(3) . . ?
 O7 C44 C43 109.6(2) . . ?
 O7 C45 C46 122.8(2) . . ?
 O7 C45 C50 117.3(2) . . ?
 C46 C45 C50 119.9(2) . . ?
 C47 C46 C45 120.3(3) . . ?
 C46 C47 C48 120.4(3) . . ?
 C47 C48 C49 120.0(3) . . ?
 C48 C49 C50 121.2(3) . . ?
 C45 C50 N4 118.2(2) . . ?
 C49 C50 N4 123.6(2) . . ?
 C49 C50 C45 118.2(2) . . ?
 N4 C51 C25 126.5(2) . . ?
 C53 C52 C57 118.6(2) . . ?
 O8 C53 C52 124.3(2) . . ?
 O8 C53 C54 114.8(2) . . ?
 C52 C53 C54 121.0(2) . . ?
 C55 C54 C53 119.7(2) . . ?
 C54 C55 C56 120.0(2) . . ?
 C54 C55 C58 122.6(2) . . ?
 C56 C55 C58 117.3(2) . . ?
 C57 C56 C55 119.9(2) . . ?
 O9 C57 C52 114.6(2) . . ?
 O9 C57 C56 124.5(2) . . ?
 C56 C57 C52 120.9(2) . . ?
 N5 C58 C55 113.91(19) . . ?
 N5 C59 C60 112.50(19) . . ?
 C61 C60 C59 119.0(2) . . ?
 C73 C60 C59 120.7(2) . . ?
 C73 C60 C61 120.3(2) . . ?
 C60 C61 C62 123.1(2) . . ?
 C60 C61 C66 119.7(2) . . ?
 C66 C61 C62 117.3(2) . . ?
 C63 C62 C61 121.3(3) . . ?
 C62 C63 C64 121.0(3) . . ?
 C65 C64 C63 120.4(3) . . ?
 C64 C65 C66 121.0(3) . . ?
 C61 C66 C65 119.0(3) . . ?
 C67 C66 C61 119.4(3) . . ?
 C67 C66 C65 121.6(3) . . ?
 C66 C67 C68 122.2(3) . . ?
 C67 C68 C69 121.7(3) . . ?
 C67 C68 C73 119.0(3) . . ?
 C69 C68 C73 119.2(3) . . ?
 C70 C69 C68 121.3(3) . . ?
 C69 C70 C71 119.9(3) . . ?
 C72 C71 C70 121.2(3) . . ?
 C71 C72 C73 121.4(3) . . ?
 C60 C73 C68 119.4(2) . . ?
 C60 C73 C72 123.7(3) . . ?
 C72 C73 C68 116.9(3) . . ?
 N6 C76 C77 123.0(2) . . ?
 N6 C76 C102 118.2(2) . . ?
 C77 C76 C102 118.8(2) . . ?
 C78 C77 C76 119.1(3) . . ?
 C77 C78 C79 118.4(3) . . ?
 C78 C79 C80 119.2(2) . . ?
 N6 C80 C79 122.9(2) . . ?
 N6 C80 C81 119.9(2) . . ?
 C79 C80 C81 117.2(2) . . ?
 N7 C81 C80 124.9(2) . . ?
 C83 C82 N7 123.1(2) . . ?
 C83 C82 C87 118.5(2) . . ?
 C87 C82 N7 118.3(2) . . ?
 C84 C83 C82 120.5(3) . . ?
 C85 C84 C83 120.3(3) . . ?
 C84 C85 C86 120.6(3) . . ?
 C85 C86 C87 120.2(3) . . ?
 O10 C87 C82 116.4(2) . . ?
 O10 C87 C86 123.8(3) . . ?
 C86 C87 C82 119.7(3) . . ?
 C89 C88 O10 116.3(3) . . ?
 O11 C89 C88 124.0(4) . . ?
 O11 C90 C91 110.4(3) . . ?
 O12 C91 C90 111.1(3) . . ?
 O12 C92 C93 110.8(3) . . ?
 C93A C92 O12 109.9(4) . . ?
 O13 C93 C92 112.0(5) . . ?
 C95 C94 O13A 94.4(3) . . ?
 O13 C94 C95 121.6(3) . . ?
 O14 C95 C94 108.6(2) . . ?
 O14 C96 C97 124.5(2) . . ?
 O14 C96 C101 116.3(2) . . ?
 C97 C96 C101 119.2(2) . . ?
 C98 C97 C96 120.3(3) . . ?
 C99 C98 C97 120.7(3) . . ?
 C98 C99 C100 119.4(3) . . ?
 C99 C100 C101 121.2(3) . . ?
 C96 C101 N8 119.8(2) . . ?
 C100 C101 N8 121.0(2) . . ?
 C100 C101 C96 119.0(2) . . ?
 N8 C102 C76 122.6(2) . . ?
 N9 C103 C104 179.9(6) . . ?
 N10 C105 C106 178.3(5) . . ?
 N11 C107 C108 177.2(7) . . ?
 N12 C109 C110 179.8(6) . . ?
 C94 O13 C93 110.2(4) . . ?
 C93A O13A C94 110.0(5) . . ?
 C92 C93A O13A 109.8(7) . . ?

_shelx_res_file
;
TITL sam019_a.res in P-1
    sam019.res
    created by SHELXL-2018/3 at 14:48:02 on 16-Jul-2020
REM Old TITL SAM019 in P-1
REM SHELXT solution in P-1
REM R1 0.229, Rweak 0.021, Alpha 0.060, Orientation as input
REM Formula found by SHELXT: C110 N15 O10 F12 P2
CELL 0.71073 14.8682 17.5982 23.1552 69.301 76.238 69.289
ZERR 2 0.0031 0.0036 0.0049 0.004 0.004 0.004
LATT 1
SFAC C H F N O P
UNIT 220 236 24 24 28 4

L.S. 8
PLAN  10
SIZE 0.5 0.4 0.3
TEMP -100.15
list 4
fmap 2 53
acta
REM <olex2.extras>
REM <HklSrc "%.\\SAM019.hkl">
REM </olex2.extras>

WGHT    0.083000    3.887600
FVAR       0.21572
P1    6    0.808096    1.062006    0.136171    11.00000    0.05500    0.05070 =
         0.05050   -0.01994   -0.00017   -0.01909
P2    6    0.823184    0.570880    0.643403    11.00000    0.06269    0.04350 =
         0.04455   -0.01155   -0.00051   -0.02681
F1    3    0.822068    1.012763    0.087678    11.00000    0.08995    0.12921 =
         0.11465   -0.08330   -0.00006   -0.03995
F2    3    0.741557    1.144444    0.095196    11.00000    0.14728    0.10429 =
         0.07944   -0.01444   -0.03338    0.02875
F3    3    0.793215    1.111278    0.184284    11.00000    0.16147    0.08612 =
         0.06038   -0.03554   -0.00489   -0.04372
F4    3    0.875659    0.979297    0.177098    11.00000    0.12814    0.08037 =
         0.11285   -0.01722   -0.04554    0.00803
F5    3    0.716906    1.032464    0.170996    11.00000    0.09488    0.13095 =
         0.14262   -0.05634    0.04510   -0.06298
F6    3    0.898952    1.091778    0.099354    11.00000    0.10953    0.13701 =
         0.12727   -0.06292    0.03643   -0.08424
PART 1
F7    3    0.829014    0.528990    0.592906    10.50000    0.16781    0.11591 =
         0.07931   -0.07495    0.02541   -0.03384
PART 0
F8    3    0.779579    0.663958    0.600907    11.00000    0.13574    0.06810 =
         0.08904    0.00456   -0.04966   -0.02957
PART 1
F9    3    0.809822    0.616246    0.693027    10.70000    0.22771    0.05983 =
         0.05591   -0.01680   -0.03798   -0.03923
PART 0
F10   3    0.870051    0.479329    0.685618    11.00000    0.20258    0.04590 =
         0.14207    0.00326   -0.07695   -0.02934
PART 1
F11   3    0.711921    0.569177    0.662971    10.60000    0.05882    0.10334 =
         0.20179   -0.06242    0.01549   -0.04343
F12   3    0.924563    0.575254    0.624078    10.50000    0.04322    0.11724 =
         0.27360   -0.05016   -0.00492   -0.04569

PART 0
O1    5    0.844991    0.522429   -0.115194    11.00000    0.02627    0.05184 =
         0.03478   -0.01907   -0.00109   -0.00300
O2    5    0.573423    0.752962   -0.191367    11.00000    0.04707    0.03894 =
         0.03341   -0.00760   -0.01622   -0.00525

O3    5    0.492333    0.848783    0.089033    11.00000    0.03118    0.03527 =
         0.04225   -0.00677    0.00534   -0.00412
O4    5    0.396819    0.734444    0.182537    11.00000    0.06528    0.04004 =
         0.04241   -0.01302    0.00158   -0.02168
O5    5    0.418527    0.575411    0.172690    11.00000    0.04761    0.07361 =
         0.06908   -0.04234    0.02145   -0.04066
O6    5    0.544360    0.461412    0.109561    11.00000    0.03582    0.07269 =
         0.08736   -0.05245   -0.01184   -0.00907
O7    5    0.756634    0.417752    0.084212    11.00000    0.02929    0.03385 =
         0.04504   -0.01374   -0.00337   -0.01087
O8    5    0.150245    0.981502    0.623858    11.00000    0.02895    0.05839 =
         0.04472   -0.02673   -0.00296   -0.00282
O9    5    0.429057    0.764823    0.703384    11.00000    0.05605    0.04400 =
         0.03866   -0.00857   -0.02256   -0.00678
O10   5    0.248636    1.066342    0.418621    11.00000    0.03202    0.04783 =
         0.06168   -0.02416   -0.00970   -0.01146
O11   5    0.458426    1.017459    0.398417    11.00000    0.03538    0.06231 =
         0.10778   -0.04411   -0.00717   -0.01485
O12   5    0.586980    0.890075    0.343839    11.00000    0.05426    0.07611 =
         0.07070   -0.03532    0.01686   -0.04147
O14   5    0.496977    0.635440    0.449592    11.00000    0.02912    0.03293 =
         0.03226   -0.00798    0.00018   -0.00372
N1    4    0.676072    0.622280    0.073172    11.00000    0.02076    0.02762 =
         0.02479   -0.00871    0.00017   -0.00759
AFIX  23
H1A   2    0.719897    0.651509    0.053281    11.00000   -1.20000
H1B   2    0.708006    0.565817    0.080173    11.00000   -1.20000
AFIX   0

N2    4    0.833701    0.691429    0.021411    11.00000    0.02496    0.03007 =
         0.02673   -0.01041    0.00035   -0.00856
N3    4    0.649646    0.815090    0.005230    11.00000    0.02763    0.02669 =
         0.03185   -0.00923   -0.00176   -0.00660
N4    4    0.875762    0.507684    0.076552    11.00000    0.02528    0.03013 =
         0.02893   -0.00968   -0.00334   -0.00555
N5    4    0.319879    0.862463    0.442832    11.00000    0.02023    0.02524 =
         0.02504   -0.00565   -0.00216   -0.00577
AFIX  23
H5A   2    0.289646    0.919465    0.431960    11.00000   -1.20000
H5B   2    0.274529    0.835470    0.464372    11.00000   -1.20000
AFIX   0

N6    4    0.152203    0.804929    0.495833    11.00000    0.02393    0.02885 =
         0.02604   -0.00822   -0.00150   -0.00678
N7    4    0.128255    0.980040    0.424314    11.00000    0.02520    0.02606 =
         0.03151   -0.00847   -0.00703   -0.00399
N8    4    0.329043    0.679871    0.524475    11.00000    0.02676    0.02447 =
         0.02962   -0.00686   -0.00293   -0.00493
N9    4    0.206877    0.678621    0.065276    11.00000    0.08870    0.08414 =
         0.13758   -0.00154   -0.05304   -0.04196
N10   4    0.159038    0.967724    0.089038    11.00000    0.06047    0.08168 =
         0.07906   -0.02332   -0.00551   -0.01662
N11   4    0.822945    0.528637    0.431568    11.00000    0.05421    0.10976 =
         0.20987   -0.07606   -0.01236   -0.00661
N12   4    0.792850    0.812656    0.437745    11.00000    0.08652    0.10305 =
         0.14242   -0.00633   -0.04219   -0.04120
C1    1    0.760159    0.584923   -0.107946    11.00000    0.02264    0.03693 =
         0.03145   -0.01328   -0.00026   -0.01241
C2    1    0.708546    0.641644   -0.155780    11.00000    0.03338    0.03691 =
         0.02749   -0.01107   -0.00216   -0.01652
AFIX  43
H2    2    0.731555    0.640656   -0.197537    11.00000   -1.20000
AFIX   0
C3    1    0.621520    0.700726   -0.141529    11.00000    0.03423    0.02878 =
         0.02945   -0.00501   -0.00960   -0.01332
C4    1    0.587892    0.703457   -0.081086    11.00000    0.02768    0.02786 =
         0.03426   -0.01090   -0.00688   -0.00853
AFIX  43
H4    2    0.528764    0.744197   -0.072126    11.00000   -1.20000
AFIX   0
C5    1    0.641800    0.645646   -0.033286    11.00000    0.02349    0.03119 =
         0.02856   -0.01068   -0.00288   -0.01170
C6    1    0.727921    0.586510   -0.046583    11.00000    0.02543    0.03426 =
         0.02961   -0.00857   -0.00526   -0.00932
AFIX  43
H6    2    0.764801    0.547294   -0.014161    11.00000   -1.20000
AFIX   0
C7    1    0.600665    0.646916    0.032717    11.00000    0.02194    0.03312 =
         0.03225   -0.01038   -0.00416   -0.01004
AFIX  23
H7A   2    0.557802    0.704859    0.032052    11.00000   -1.20000
H7B   2    0.560537    0.607531    0.050772    11.00000   -1.20000
AFIX   0
C8    1    0.633737    0.640005    0.134409    11.00000    0.02438    0.03943 =
         0.02489   -0.01191    0.00167   -0.00659
AFIX  23
H8A   2    0.580131    0.614406    0.153711    11.00000   -1.20000
H8B   2    0.606750    0.702204    0.127381    11.00000   -1.20000
AFIX   0
C9    1    0.709695    0.604002    0.177880    11.00000    0.02486    0.03779 =
         0.02239   -0.01121    0.00111   -0.00500
C10   1    0.731419    0.516737    0.212467    11.00000    0.02644    0.03978 =
         0.02335   -0.01275    0.00195   -0.00595
C11   1    0.680661    0.461738    0.210867    11.00000    0.03711    0.04647 =
         0.03020   -0.01539    0.00327   -0.01342
AFIX  43
H11   2    0.628092    0.484688    0.187050    11.00000   -1.20000
AFIX   0
C12   1    0.706246    0.377751    0.242650    11.00000    0.05105    0.04463 =
         0.03820   -0.01568    0.00874   -0.02033
AFIX  43
H12   2    0.671526    0.342866    0.240575    11.00000   -1.20000
AFIX   0
C13   1    0.783566    0.341335    0.278744    11.00000    0.05452    0.03711 =
         0.03996   -0.00709    0.00337   -0.00947
AFIX  43
H13   2    0.801231    0.282186    0.300204    11.00000   -1.20000
AFIX   0
C14   1    0.832376    0.390394    0.282798    11.00000    0.03743    0.04459 =
         0.03360   -0.00632   -0.00157    0.00038
AFIX  43
H14   2    0.883974    0.365322    0.307542    11.00000   -1.20000
AFIX   0
C15   1    0.808120    0.479383    0.250635    11.00000    0.03195    0.04149 =
         0.02637   -0.01067    0.00003   -0.00451
C16   1    0.858096    0.530616    0.254206    11.00000    0.03189    0.05315 =
         0.03108   -0.01155   -0.00894   -0.00435
AFIX  43
H16   2    0.908597    0.505923    0.279792    11.00000   -1.20000
AFIX   0
C17   1    0.836914    0.616586    0.221742    11.00000    0.03213    0.04892 =
         0.03104   -0.01770    0.00026   -0.00986
C18   1    0.889220    0.668160    0.226308    11.00000    0.04368    0.06843 =
         0.04688   -0.02153   -0.00747   -0.02063
AFIX  43
H18   2    0.939146    0.643229    0.252342    11.00000   -1.20000
AFIX   0
C19   1    0.868832    0.751820    0.194199    11.00000    0.05579    0.06751 =
         0.05616   -0.02364   -0.00060   -0.03282
AFIX  43
H19   2    0.903795    0.785317    0.198093    11.00000   -1.20000
AFIX   0
C20   1    0.795585    0.789152    0.154954    11.00000    0.06270    0.04820 =
         0.04256   -0.01431    0.00180   -0.02261
AFIX  43
H20   2    0.782320    0.847788    0.132194    11.00000   -1.20000
AFIX   0
C21   1    0.743753    0.743476    0.148935    11.00000    0.04456    0.04343 =
         0.02836   -0.01251    0.00093   -0.01272
AFIX  43
H21   2    0.694740    0.770662    0.122178    11.00000   -1.20000
AFIX   0
C22   1    0.761427    0.654585    0.182258    11.00000    0.02887    0.04081 =
         0.02365   -0.01418    0.00413   -0.00735
C23   1    0.878171    0.510650   -0.175676    11.00000    0.03596    0.06996 =
         0.04335   -0.03158    0.00313   -0.00750
AFIX 137
H23A  2    0.894360    0.561378   -0.204912    11.00000   -1.50000
H23B  2    0.826956    0.501444   -0.189958    11.00000   -1.50000
H23C  2    0.935898    0.461070   -0.173538    11.00000   -1.50000
AFIX   0
C24   1    0.477415    0.805996   -0.178933    11.00000    0.04915    0.04431 =
         0.04714   -0.01240   -0.02561    0.00086
AFIX 137
H24A  2    0.449300    0.836922   -0.218005    11.00000   -1.50000
H24B  2    0.479778    0.846712   -0.159805    11.00000   -1.50000
H24C  2    0.437352    0.770709   -0.150467    11.00000   -1.50000
AFIX   0

C25   1    0.921679    0.639435    0.034933    11.00000    0.02343    0.03543 =
         0.03153   -0.01071   -0.00255   -0.00877
C26   1    1.001458    0.669117    0.024487    11.00000    0.02727    0.04383 =
         0.04412   -0.01125   -0.00556   -0.01170
AFIX  43
H26   2    1.062386    0.630732    0.035974    11.00000   -1.20000
AFIX   0
C27   1    0.990792    0.754537   -0.002613    11.00000    0.03180    0.04996 =
         0.05239   -0.01487   -0.00074   -0.02365
AFIX  43
H27   2    1.044020    0.776173   -0.010108    11.00000   -1.20000
AFIX   0
C28   1    0.901555    0.807924   -0.018622    11.00000    0.03826    0.03619 =
         0.04499   -0.01040    0.00424   -0.01838
AFIX  43
H28   2    0.892773    0.866901   -0.038728    11.00000   -1.20000
AFIX   0
C29   1    0.824179    0.774850   -0.005127    11.00000    0.02943    0.03260 =
         0.02680   -0.00929    0.00250   -0.01265
C30   1    0.728214    0.833475   -0.019853    11.00000    0.03654    0.02720 =
         0.03055   -0.00668   -0.00206   -0.01108
AFIX  43
H30   2    0.724661    0.887670   -0.049505    11.00000   -1.20000
AFIX   0
C31   1    0.561800    0.875038   -0.015247    11.00000    0.03155    0.02349 =
         0.04025   -0.00769   -0.00719   -0.00946
C32   1    0.553276    0.914201   -0.078436    11.00000    0.04836    0.03504 =
         0.04349   -0.01124   -0.01357   -0.01123
AFIX  43
H32   2    0.608136    0.902623   -0.108444    11.00000   -1.20000
AFIX   0
C33   1    0.465967    0.969687   -0.097976    11.00000    0.06544    0.03836 =
         0.05646   -0.00795   -0.03309   -0.01238
AFIX  43
H33   2    0.460514    0.995561   -0.141113    11.00000   -1.20000
AFIX   0
C34   1    0.387340    0.986934   -0.054367    11.00000    0.04360    0.03556 =
         0.07978   -0.01236   -0.03063   -0.00583
AFIX  43
H34   2    0.327487    1.025526   -0.067624    11.00000   -1.20000
AFIX   0
C35   1    0.393754    0.949407    0.007975    11.00000    0.03132    0.03053 =
         0.07232   -0.01435   -0.00856   -0.00774
AFIX  43
H35   2    0.338788    0.962755    0.037505    11.00000   -1.20000
AFIX   0
C36   1    0.480597    0.891711    0.028271    11.00000    0.03081    0.02457 =
         0.04862   -0.00885   -0.00577   -0.00941
C37   1    0.414735    0.870072    0.136251    11.00000    0.04280    0.03839 =
         0.05766   -0.02015    0.01790   -0.01128
AFIX  23
H37A  2    0.351589    0.883091    0.122209    11.00000   -1.20000
H37B  2    0.416321    0.920825    0.144822    11.00000   -1.20000
AFIX   0
C38   1    0.426882    0.795887    0.193738    11.00000    0.04318    0.04339 =
         0.04859   -0.02472    0.01492   -0.01707
AFIX  23
H38A  2    0.495460    0.772480    0.201554    11.00000   -1.20000
H38B  2    0.386278    0.812985    0.230298    11.00000   -1.20000
AFIX   0
C39   1    0.392953    0.664271    0.234905    11.00000    0.05836    0.04881 =
         0.03752   -0.01245    0.00745   -0.01995
AFIX  23
H39A  2    0.350393    0.683653    0.270120    11.00000   -1.20000
H39B  2    0.458649    0.633192    0.247297    11.00000   -1.20000
AFIX   0
C40   1    0.354634    0.607252    0.219945    11.00000    0.03553    0.04615 =
         0.04375   -0.01114    0.00565   -0.01542
AFIX  23
H40A  2    0.347337    0.559496    0.257612    11.00000   -1.20000
H40B  2    0.290017    0.639044    0.205995    11.00000   -1.20000
AFIX   0
C41   1    0.389685    0.515484    0.159658    11.00000    0.03998    0.04630 =
         0.06089   -0.01820    0.00018   -0.02549
AFIX  23
H41A  2    0.319951    0.538308    0.154590    11.00000   -1.20000
H41B  2    0.399179    0.462421    0.194874    11.00000   -1.20000
AFIX   0
C42   1    0.446844    0.496920    0.102493    11.00000    0.06034    0.06065 =
         0.07907   -0.01970   -0.01869   -0.02700
AFIX  23
H42A  2    0.423966    0.456997    0.092661    11.00000   -1.20000
H42B  2    0.437619    0.550097    0.067377    11.00000   -1.20000
AFIX   0
C43   1    0.604010    0.425035    0.062730    11.00000    0.04352    0.05539 =
         0.06611   -0.02991   -0.00497   -0.02352
AFIX  23
H43A  2    0.616165    0.470576    0.024627    11.00000   -1.20000
H43B  2    0.570948    0.392561    0.052270    11.00000   -1.20000
AFIX   0
C44   1    0.697061    0.367824    0.085233    11.00000    0.04218    0.04349 =
         0.06335   -0.02759   -0.00001   -0.01814
AFIX  23
H44A  2    0.684740    0.331347    0.128190    11.00000   -1.20000
H44B  2    0.731182    0.330527    0.058309    11.00000   -1.20000
AFIX   0
C45   1    0.843123    0.372145    0.106968    11.00000    0.03171    0.03256 =
         0.02959   -0.01197    0.00123   -0.00716
C46   1    0.870259    0.283689    0.132786    11.00000    0.04624    0.03286 =
         0.04773   -0.01283    0.00251   -0.01253
AFIX  43
H46   2    0.827705    0.252949    0.135012    11.00000   -1.20000
AFIX   0
C47   1    0.957964    0.241126    0.154898    11.00000    0.05503    0.02914 =
         0.05283   -0.00378   -0.00363   -0.00087
AFIX  43
H47   2    0.976025    0.181002    0.172157    11.00000   -1.20000
AFIX   0
C48   1    1.019958    0.284995    0.152234    11.00000    0.04700    0.04079 =
         0.06282   -0.00514   -0.02004    0.00097
AFIX  43
H48   2    1.080404    0.255231    0.167955    11.00000   -1.20000
AFIX   0
C49   1    0.994351    0.372151    0.126746    11.00000    0.03789    0.03852 =
         0.05424   -0.00731   -0.01620   -0.00599
AFIX  43
H49   2    1.037617    0.401908    0.125136    11.00000   -1.20000
AFIX   0
C50   1    0.906089    0.417498    0.103267    11.00000    0.02813    0.03099 =
         0.03231   -0.00994   -0.00394   -0.00186
C51   1    0.938827    0.546624    0.061103    11.00000    0.02332    0.03789 =
         0.03936   -0.01047   -0.00642   -0.00397
AFIX  43
H51   2    1.003724    0.512782    0.066915    11.00000   -1.20000
AFIX   0

C52   1    0.290692    0.869470    0.666166    11.00000    0.03646    0.03985 =
         0.03110   -0.01256   -0.00344   -0.01743
AFIX  43
H52   2    0.269232    0.875561    0.706791    11.00000   -1.20000
AFIX   0
C53   1    0.235938    0.919526    0.618118    11.00000    0.02367    0.03708 =
         0.03902   -0.01447   -0.00224   -0.01154
C54   1    0.266703    0.910506    0.558515    11.00000    0.02471    0.03764 =
         0.03226   -0.00888   -0.00731   -0.00945
AFIX  43
H54   2    0.228198    0.945108    0.525914    11.00000   -1.20000
AFIX   0
C55   1    0.353493    0.850985    0.547058    11.00000    0.02570    0.03016 =
         0.03219   -0.00906   -0.00617   -0.01154
C56   1    0.409343    0.799978    0.595076    11.00000    0.02908    0.02719 =
         0.03762   -0.00985   -0.00949   -0.00801
AFIX  43
H56   2    0.468669    0.758610    0.587382    11.00000   -1.20000
AFIX   0
C57   1    0.378416    0.809609    0.653767    11.00000    0.03946    0.02986 =
         0.03263   -0.00370   -0.01457   -0.01365
C58   1    0.394575    0.841832    0.483085    11.00000    0.01945    0.02981 =
         0.03339   -0.00953   -0.00470   -0.00672
AFIX  23
H58A  2    0.436181    0.879661    0.462418    11.00000   -1.20000
H58B  2    0.436168    0.782586    0.487239    11.00000   -1.20000
AFIX   0
C59   1    0.364689    0.835528    0.385065    11.00000    0.02566    0.03495 =
         0.02613   -0.01124    0.00105   -0.00499
AFIX  23
H59A  2    0.388468    0.772641    0.396740    11.00000   -1.20000
H59B  2    0.421168    0.857273    0.365585    11.00000   -1.20000
AFIX   0
C60   1    0.294391    0.867595    0.338366    11.00000    0.02606    0.03195 =
         0.02302   -0.01225    0.00235   -0.00389
C61   1    0.285109    0.948838    0.294602    11.00000    0.03130    0.03456 =
         0.02482   -0.01306    0.00380   -0.00689
C62   1    0.339520    1.002892    0.292360    11.00000    0.04396    0.03980 =
         0.03398   -0.01192    0.00297   -0.01413
AFIX  43
H62   2    0.385683    0.983225    0.320554    11.00000   -1.20000
AFIX   0
C63   1    0.326382    1.081885    0.250628    11.00000    0.05686    0.03945 =
         0.05048   -0.01611    0.01404   -0.01956
AFIX  43
H63   2    0.363198    1.116505    0.250362    11.00000   -1.20000
AFIX   0
C64   1    0.259508    1.112906    0.208111    11.00000    0.05596    0.03500 =
         0.04762   -0.00013    0.00888   -0.00467
AFIX  43
H64   2    0.250611    1.168560    0.179784    11.00000   -1.20000
AFIX   0
C65   1    0.207607    1.064254    0.207111    11.00000    0.05019    0.04747 =
         0.03363    0.00164   -0.00432   -0.00093
AFIX  43
H65   2    0.163409    1.085667    0.177440    11.00000   -1.20000
AFIX   0
C66   1    0.218170    0.980496    0.250266    11.00000    0.03484    0.04003 =
         0.02639   -0.00933   -0.00164   -0.00228
C67   1    0.164625    0.930306    0.250217    11.00000    0.03804    0.06094 =
         0.03329   -0.01453   -0.01081   -0.00828
AFIX  43
H67   2    0.120214    0.951823    0.220667    11.00000   -1.20000
AFIX   0
C68   1    0.173641    0.849132    0.292109    11.00000    0.03744    0.05404 =
         0.03413   -0.02035    0.00054   -0.01593
C69   1    0.120589    0.797004    0.290343    11.00000    0.05417    0.08309 =
         0.05947   -0.03005   -0.00616   -0.03088
AFIX  43
H69   2    0.077242    0.818038    0.260191    11.00000   -1.20000
AFIX   0
C70   1    0.130567    0.718082    0.330711    11.00000    0.06034    0.07720 =
         0.08106   -0.03946    0.00935   -0.04365
AFIX  43
H70   2    0.094817    0.684047    0.328568    11.00000   -1.20000
AFIX   0
C71   1    0.193732    0.686514    0.375744    11.00000    0.05737    0.04700 =
         0.05780   -0.02321    0.01805   -0.02479
AFIX  43
H71   2    0.199520    0.631343    0.404368    11.00000   -1.20000
AFIX   0
C72   1    0.246754    0.733274    0.379215    11.00000    0.04222    0.03750 =
         0.03506   -0.01516    0.00746   -0.01097
AFIX  43
H72   2    0.289327    0.709996    0.410031    11.00000   -1.20000
AFIX   0
C73   1    0.239887    0.816830    0.337468    11.00000    0.03239    0.03671 =
         0.02814   -0.01608    0.00511   -0.00862
C74   1    0.119536    1.001007    0.681953    11.00000    0.03726    0.08243 =
         0.05864   -0.04510    0.00262   -0.01041
AFIX 137
H74A  2    0.059061    1.047997    0.679142    11.00000   -1.50000
H74B  2    0.169746    1.017557    0.691134    11.00000   -1.50000
H74C  2    0.108828    0.950789    0.715258    11.00000   -1.50000
AFIX   0
C75   1    0.523118    0.707423    0.692622    11.00000    0.06774    0.04577 =
         0.05675   -0.01648   -0.03919    0.00355
AFIX 137
H75A  2    0.563448    0.738480    0.659638    11.00000   -1.50000
H75B  2    0.516763    0.662236    0.679888    11.00000   -1.50000
H75C  2    0.553507    0.682279    0.730977    11.00000   -1.50000
AFIX   0

C76   1    0.155217    0.724205    0.528428    11.00000    0.02721    0.03016 =
         0.02923   -0.00803   -0.00034   -0.00949
C77   1    0.074520    0.694808    0.544268    11.00000    0.03407    0.03692 =
         0.03872   -0.00661    0.00047   -0.01441
AFIX  43
H77   2    0.079214    0.637621    0.568520    11.00000   -1.20000
AFIX   0
C78   1   -0.011946    0.749534    0.524387    11.00000    0.02617    0.04670 =
         0.05045   -0.01067   -0.00104   -0.01740
AFIX  43
H78   2   -0.067660    0.730651    0.533634    11.00000   -1.20000
AFIX   0
C79   1   -0.016037    0.832940    0.490525    11.00000    0.02182    0.04204 =
         0.04658   -0.01025   -0.00486   -0.00772
AFIX  43
H79   2   -0.074840    0.872305    0.476124    11.00000   -1.20000
AFIX   0
C80   1    0.066702    0.858304    0.477891    11.00000    0.02287    0.03419 =
         0.02970   -0.00980   -0.00236   -0.00661
C81   1    0.058194    0.948040    0.442804    11.00000    0.02364    0.03209 =
         0.03551   -0.00838   -0.00661   -0.00173
AFIX  43
H81   2   -0.004331    0.984771    0.433272    11.00000   -1.20000
AFIX   0
C82   1    0.109787    1.066470    0.386922    11.00000    0.02556    0.02662 =
         0.03328   -0.00844   -0.00204   -0.00178
C83   1    0.035104    1.107507    0.350089    11.00000    0.03505    0.03750 =
         0.04975   -0.00428   -0.01314   -0.00754
AFIX  43
H83   2   -0.007023    1.077793    0.349765    11.00000   -1.20000
AFIX   0
C84   1    0.021559    1.191380    0.313836    11.00000    0.04981    0.04144 =
         0.05902    0.00097   -0.01735   -0.00111
AFIX  43
H84   2   -0.029573    1.218732    0.288684    11.00000   -1.20000
AFIX   0
C85   1    0.081051    1.234774    0.314055    11.00000    0.06313    0.02990 =
         0.05679    0.00009   -0.00255   -0.00723
AFIX  43
H85   2    0.070214    1.292695    0.289807    11.00000   -1.20000
AFIX   0
C86   1    0.156433    1.195716    0.348919    11.00000    0.05258    0.03898 =
         0.05552   -0.01627    0.00687   -0.02028
AFIX  43
H86   2    0.197544    1.226630    0.348771    11.00000   -1.20000
AFIX   0
C87   1    0.173084    1.110737    0.384638    11.00000    0.02921    0.03489 =
         0.04511   -0.01859    0.00039   -0.00730
C88   1    0.308618    1.113897    0.420283    11.00000    0.04606    0.08268 =
         0.18735   -0.09136   -0.02683   -0.00839
AFIX  23
H88A  2    0.309341    1.159615    0.380276    11.00000   -1.20000
H88B  2    0.278017    1.141589    0.453562    11.00000   -1.20000
AFIX   0
C89   1    0.400248    1.069871    0.429914    11.00000    0.04578    0.10316 =
         0.21552   -0.11601   -0.00265   -0.02432
AFIX  23
H89A  2    0.433471    1.112150    0.424690    11.00000   -1.20000
H89B  2    0.398052    1.036094    0.474393    11.00000   -1.20000
AFIX   0
C90   1    0.558378    0.989067    0.398603    11.00000    0.03928    0.05197 =
         0.11365   -0.02822   -0.01323   -0.01949
AFIX  23
H90A  2    0.575140    0.940406    0.436253    11.00000   -1.20000
H90B  2    0.580634    1.035194    0.399837    11.00000   -1.20000
AFIX   0
C91   1    0.607345    0.962916    0.343119    11.00000    0.07067    0.06479 =
         0.11173   -0.03124    0.03031   -0.04354
AFIX  23
H91A  2    0.585858    1.010023    0.305585    11.00000   -1.20000
H91B  2    0.678204    0.950461    0.341003    11.00000   -1.20000
AFIX   0
C92   1    0.637804    0.857693    0.293041    11.00000    0.07180    0.06034 =
         0.05491   -0.01802    0.02338   -0.02349
PART 1
C93   1    0.647362    0.758923    0.310343    10.60000    0.04928    0.05250 =
         0.06627   -0.03029    0.02931   -0.03049
PART 0
C94   1    0.566483    0.661332    0.343418    11.00000    0.06667    0.04347 =
         0.03966   -0.01358    0.01247   -0.01259
C95   1    0.581249    0.606697    0.408546    11.00000    0.03335    0.03274 =
         0.04270   -0.01580    0.00152   -0.00553
AFIX  23
H95A  2    0.591498    0.546603    0.411995    11.00000   -1.20000
H95B  2    0.639240    0.610519    0.419973    11.00000   -1.20000
AFIX   0
C96   1    0.499957    0.598180    0.512069    11.00000    0.03085    0.02331 =
         0.03512   -0.00768   -0.00564   -0.00836
C97   1    0.582227    0.540987    0.538684    11.00000    0.02958    0.03512 =
         0.04843   -0.01293   -0.00580   -0.00498
AFIX  43
H97   2    0.640688    0.523692    0.512751    11.00000   -1.20000
AFIX   0
C98   1    0.579219    0.509294    0.602614    11.00000    0.03670    0.03797 =
         0.04929   -0.00806   -0.01635   -0.00382
AFIX  43
H98   2    0.635902    0.470662    0.620311    11.00000   -1.20000
AFIX   0
C99   1    0.495207    0.532993    0.640897    11.00000    0.04617    0.03723 =
         0.03801   -0.00510   -0.01426   -0.00785
AFIX  43
H99   2    0.493927    0.511601    0.684841    11.00000   -1.20000
AFIX   0
C100  1    0.412608    0.588186    0.614968    11.00000    0.03584    0.03086 =
         0.03420   -0.00881   -0.00548   -0.00775
AFIX  43
H100  2    0.354428    0.604333    0.641473    11.00000   -1.20000
AFIX   0
C101  1    0.413035    0.620490    0.550911    11.00000    0.02932    0.02130 =
         0.03324   -0.00602   -0.00591   -0.00722
C102  1    0.248810    0.663987    0.547604    11.00000    0.03154    0.02538 =
         0.02773   -0.00248   -0.00249   -0.00951
AFIX  43
H102  2    0.249118    0.611226    0.578477    11.00000   -1.20000
AFIX   0

C103  1    0.259112    0.715770    0.055131    11.00000    0.04842    0.05298 =
         0.06945   -0.01732   -0.02395   -0.00806
C104  1    0.326109    0.763190    0.042194    11.00000    0.05662    0.07693 =
         0.08315   -0.02321   -0.01675   -0.02379
AFIX 137
H10A  2    0.370123    0.756538    0.004207    11.00000   -1.50000
H10B  2    0.363708    0.742029    0.077127    11.00000   -1.50000
H10C  2    0.290380    0.823477    0.036390    11.00000   -1.50000
AFIX   0

C105  1    0.111270    0.936693    0.079914    11.00000    0.04975    0.05753 =
         0.07020   -0.02182    0.00741   -0.00751
C106  1    0.050190    0.897639    0.066139    11.00000    0.07222    0.08902 =
         0.16239   -0.07039    0.00780   -0.01959
AFIX 137
H10D  2    0.071558    0.892196    0.023973    11.00000   -1.50000
H10E  2   -0.017403    0.933352    0.068996    11.00000   -1.50000
H10F  2    0.055432    0.841164    0.096204    11.00000   -1.50000
AFIX   0

C107  1    0.875350    0.560275    0.432000    11.00000    0.05066    0.07122 =
         0.11898   -0.03312    0.00938   -0.00286
C108  1    0.943035    0.600806    0.435856    11.00000    0.08560    0.08780 =
         0.18313   -0.05848    0.02927   -0.02714
AFIX 137
H10G  2    0.937709    0.654165    0.401943    11.00000   -1.50000
H10H  2    1.009328    0.562744    0.432286    11.00000   -1.50000
H10I  2    0.927573    0.612756    0.475930    11.00000   -1.50000
AFIX   0

C109  1    0.737735    0.775793    0.458131    11.00000    0.05195    0.06872 =
         0.08597   -0.02574   -0.02350   -0.00855
C110  1    0.668497    0.729918    0.483774    11.00000    0.05520    0.09174 =
         0.08877   -0.03727   -0.01118   -0.02276
AFIX 137
H11A  2    0.625696    0.743915    0.452828    11.00000   -1.50000
H11B  2    0.629901    0.745489    0.520805    11.00000   -1.50000
H11C  2    0.702178    0.668735    0.495361    11.00000   -1.50000
AFIX   0

PART 1
O13   5    0.555622    0.744271    0.326124    10.60000    0.04098    0.04012 =
         0.03828   -0.01355    0.00826   -0.01142
PART 0
PART 2
O13A  5    0.602507    0.736388    0.348667    10.40000    0.03960    0.03757 =
         0.03700   -0.01118   -0.00675   -0.02045
C93A  1    0.601242    0.801774    0.290369    10.40000    0.06027    0.03956 =
         0.03271   -0.01313    0.01438   -0.02032

F12A  3    0.889468    0.602132    0.671427    10.30000    0.10311    0.05725 =
         0.09905   -0.01981   -0.05296   -0.02501
F9A   3    0.749132    0.565706    0.697644    10.40000    0.07389    0.13847 =
         0.08788   -0.00101    0.04477   -0.03320
F7A   3    0.912776    0.577168    0.590485    10.50000    0.14889    0.11894 =
         0.14156   -0.01654    0.07778   -0.05991
F11A  3    0.793531    0.531965    0.606779    10.50000    0.23672    0.11660 =
         0.15412   -0.00836   -0.10696   -0.11505
HKLF 4


REM  sam019_a.res in P-1
REM wR2 = 0.1861, GooF = S = 1.027, Restrained GooF = 1.027 for all data
REM R1 = 0.0616 for 13716 Fo > 4sig(Fo) and 0.1062 for all 21471 data
REM 1413 parameters refined using 0 restraints

END

WGHT      0.0829      3.8962

REM Highest difference peak  1.203,  deepest hole -0.501,  1-sigma level  0.055
Q1    1   0.4858  0.4409  0.1440  11.00000  0.05    1.20
Q2    1   0.4468  0.7056  0.2159  11.00000  0.05    0.59
Q3    1   0.5284  0.5015  0.0773  11.00000  0.05    0.53
Q4    1   0.6225  0.6265  0.3180  11.00000  0.05    0.53
Q5    1   0.8983  1.0422  0.1547  11.00000  0.05    0.52
Q6    1   0.8284  1.1407  0.0782  11.00000  0.05    0.47
Q7    1   0.5251  1.0401  0.3565  11.00000  0.05    0.46
Q8    1   0.4000  1.0999  0.3791  11.00000  0.05    0.43
Q9    1   0.3387  0.7175  0.2073  11.00000  0.05    0.42
Q10   1   0.7128  1.0807  0.1201  11.00000  0.05    0.42
;
_shelx_res_checksum                27482
_shelx_hkl_file
;
  -1   0   0  306.67   10.40
  -1   0   0  304.27   10.50
   1   0   0  314.97   12.30
   1   0   0  299.67   10.40
   1   0   0  302.27   10.50
  -2   0   0 1015.80   34.70
  -2   0   0 1041.50   35.10
  -2   0   0 1048.60   34.50
  -2   0   0  986.60   34.50
   2   0   0 1039.10   35.10
   2   0   0 1029.20   40.60
   2   0   0 1000.30   34.50
   2   0   0 1010.40   34.80
   2   0   0 1036.60   34.90
   2   0   0  983.80   38.80
   2   0   0 1016.00   36.20
  -3   0   0 1021.40   34.70
  -3   0   0 1019.90   35.00
   3   0   0 1043.10   35.10
   3   0   0 1045.90   35.20
   3   0   0 1022.00   36.30
   3   0   0 1003.10   39.00
   3   0   0  997.70   34.70
   3   0   0 1026.60   40.80
   3   0   0 1021.60   35.00
  -4   0   0  623.34   22.00
  -4   0   0  653.23   22.90
  -4   0   0  621.04   22.20
   4   0   0  648.94   22.30
   4   0   0  656.13   25.80
   4   0   0  655.53   22.20
   4   0   0  646.04   22.30
   4   0   0  632.04   22.10
   4   0   0  624.34   22.80
   4   0   0  649.04   24.80
  -5   0   0  319.07   11.60
  -5   0   0  325.07   11.70
  -5   0   0  332.17   11.80
   5   0   0  347.87   11.50
   5   0   0  323.27   11.80
   5   0   0  326.87   13.40
   5   0   0  319.17   11.70
   5   0   0  318.97   11.80
   5   0   0  326.67   11.80
  -6   0   0   60.49    3.10
  -6   0   0   65.59    2.60
  -6   0   0   61.89    3.10
   6   0   0   63.89    2.60
   6   0   0   63.79    3.30
   6   0   0   65.39    3.40
   6   0   0   69.99    3.60
   6   0   0   62.79    3.30
   6   0   0   66.79    2.60
  -7   0   0  438.86   15.60
  -7   0   0  421.56   15.80
  -7   0   0  459.95   15.80
   7   0   0  428.86   17.70
   7   0   0  434.16   15.90
   7   0   0  440.26   15.70
   7   0   0  435.86   15.80
   7   0   0  446.16   15.40
   7   0   0  445.16   18.10
  -8   0   0    8.20    1.40
  -8   0   0    8.10    1.50
   8   0   0    6.50    1.30
   8   0   0    8.10    1.60
   8   0   0   11.30    1.80
   8   0   0    7.20    0.90
   8   0   0    7.60    1.60
   8   0   0    5.60    1.40
  -9   0   0   70.99    4.00
  -9   0   0   77.99    3.90
   9   0   0   75.89    4.10
   9   0   0   74.39    4.40
   9   0   0   77.79    4.20
   9   0   0   83.99    4.40
   9   0   0   75.89    4.10
   9   0   0   82.99    3.20
 -10   0   0    7.50    1.70
 -10   0   0    7.10    1.60
  10   0   0   10.70    2.20
  10   0   0    8.20    1.80
  10   0   0    8.60    1.60
 -11   0   0    2.10    1.60
 -11   0   0    3.60    1.60
  11   0   0   -1.90    1.80
  11   0   0    1.10    1.60
  11   0   0    1.10    1.40
  11   0   0   -0.60    1.30
 -12   0   0  117.29    5.60
 -12   0   0  107.89    5.70
  12   0   0  107.59    6.10
  12   0   0   98.69    5.60
  12   0   0  108.39    5.90
  12   0   0  107.89    6.50
 -13   0   0    1.80    2.00
 -13   0   0    2.30    1.90
  13   0   0   -0.30    1.90
  13   0   0    3.40    1.90
  13   0   0   -1.10    2.40
  13   0   0    0.40    1.90
 -14   0   0    1.10    2.10
 -14   0   0   -2.00    2.10
  14   0   0    5.30    2.80
  14   0   0    0.60    1.90
  14   0   0   -0.40    2.20
  14   0   0    1.30    2.00
 -15   0   0    4.10    2.30
 -15   0   0    1.50    2.40
  15   0   0   -1.10    2.10
  15   0   0    0.60    2.80
  15   0   0   -2.80    1.90
  15   0   0    1.30    2.50
 -16   0   0    3.50    2.60
 -16   0   0    4.20    2.60
  16   0   0    0.90    2.30
  16   0   0    3.80    3.20
  16   0   0    2.10    2.70
  16   0   0    3.90    2.50
 -17   0   0    5.40    2.80
 -17   0   0    2.40    2.90
  17   0   0    5.10    4.10
  17   0   0   11.10    3.10
  17   0   0    7.50    2.80
  17   0   0    3.40    3.10
  16  -1   0    1.00    2.60
  16  -1   0    1.00    2.40
  16  -1   0   -2.80    2.10
  16  -1   0    1.80    3.10
 -16   1   0    1.10    2.60
 -16   1   0    2.10    2.50
  15  -1   0    4.00    2.40
  15  -1   0    4.00    3.00
  15  -1   0   -0.10    2.00
  15  -1   0    1.10    2.20
 -15   1   0    4.70    2.60
 -15   1   0    0.70    2.30
  14  -1   0    1.50    2.20
  14  -1   0    3.30    2.40
  14  -1   0    1.70    2.10
  14  -1   0   -0.10    1.80
 -14   1   0   -2.10    2.00
 -14   1   0   -1.20    1.90
  13  -1   0    0.00    1.60
  13  -1   0   -2.50    2.30
  13  -1   0   -1.60    1.60
  13  -1   0    2.40    2.10
 -13   1   0    1.10    1.90
 -13   1   0   -1.10    2.00
  12  -1   0    0.70    1.60
  12  -1   0    4.20    2.10
  12  -1   0    0.90    2.20
  12  -1   0   -2.10    1.70
 -12   1   0    2.50    2.00
 -12   1   0    4.10    1.80
  11  -1   0    1.50    1.80
  11  -1   0   -0.30    1.70
  11  -1   0    0.50    2.00
  11  -1   0    1.10    1.40
 -11   1   0    4.60    1.80
 -11   1   0    1.90    1.60
  10  -1   0    1.40    1.00
  10  -1   0    2.10    1.50
  10  -1   0   -0.90    1.30
  10  -1   0    2.00    1.50
 -10   1   0    0.10    1.40
 -10   1   0    0.50    1.40
   9  -1   0   13.30    1.70
   9  -1   0   14.70    1.90
   9  -1   0   13.60    2.00
  -9   1   0   11.60    1.80
  -9   1   0   14.50    1.80
   8  -1   0    0.80    1.20
   8  -1   0   -0.30    1.10
   8  -1   0   -0.40    0.50
   8  -1   0   -1.90    1.30
   8  -1   0    1.10    1.20
   8  -1   0    0.10    0.90
  -8   1   0   -0.60    1.20
  -8   1   0    1.30    1.10
   7  -1   0    0.10    1.20
   7  -1   0    0.70    1.30
   7  -1   0    0.10    1.10
   7  -1   0   -0.30    1.10
   7  -1   0    1.40    0.50
   7  -1   0    0.50    0.80
  -7   1   0    1.20    1.10
  -7   1   0    1.50    1.00
   6  -1   0   13.70    0.80
   6  -1   0   14.60    1.30
   6  -1   0   13.80    1.60
   6  -1   0   11.30    1.60
   6  -1   0   13.20    1.60
   6  -1   0   11.10    1.40
  -6   1   0   11.90    1.40
  -6   1   0   12.80    1.50
   5  -1   0    9.10    0.70
   5  -1   0    8.10    1.30
   5  -1   0    9.10    1.30
   5  -1   0    9.90    1.40
  -5   1   0   10.40    1.20
  -5   1   0    9.20    1.10
   4  -1   0   29.90    1.20
   4  -1   0   31.10    1.90
   4  -1   0   30.90    2.00
   4  -1   0   25.90    1.70
  -4   1   0   27.80    1.70
  -4   1   0   29.50    2.00
  -4   1   0   28.50    1.70
   3  -1   0   73.79    3.40
   3  -1   0   74.59    2.70
   3  -1   0   73.69    3.10
   3  -1   0   74.79    3.00
  -3   1   0   72.39    2.90
  -3   1   0   73.69    3.00
  -3   1   0   80.79    3.10
  -3   1   0   75.39    3.50
   2  -1   0    3.60    0.70
   2  -1   0    3.10    0.50
   2  -1   0    3.60    0.40
  -2   1   0    2.50    0.70
  -2   1   0    3.80    0.70
  -2   1   0    3.60    0.50
  -2   1   0    3.70    0.50
  -2   1   0    2.00    0.70
  -2   1   0    2.80    0.60
   1  -1   0   16.90    0.80
   1  -1   0   15.70    0.90
   1  -1   0   17.80    0.80
  -1   1   0   17.90    0.90
  -1   1   0   16.30    0.80
  -1   1   0   16.70    0.80
  -1   1   0   18.00    0.80
   0   1   0    3.30    0.30
   0   1   0    4.30    0.30
  -1  -1   0    2.20    0.30
  -1  -1   0    2.50    0.30
   1   1   0    2.30    0.40
   1   1   0    2.20    0.40
   1   1   0    2.00    0.30
   1   1   0    2.40    0.30
   1   1   0    2.40    0.40
   1   1   0    2.80    0.40
  -2  -1   0   45.10    1.80
  -2  -1   0   43.10    1.90
   2   1   0   43.70    1.80
   2   1   0   46.20    1.90
   2   1   0   47.40    2.10
   2   1   0   42.90    2.00
   2   1   0   45.20    2.00
   2   1   0   45.00    2.00
  -3  -1   0    0.90    0.70
  -3  -1   0    0.20    0.80
   3   1   0    1.70    0.60
   3   1   0    1.00    0.70
   3   1   0    1.40    1.00
   3   1   0    1.30    0.60
   3   1   0    0.30    0.70
   3   1   0    0.90    0.90
   3   1   0   -0.30    0.80
   3   1   0    1.10    0.70
  -4  -1   0   -1.40    0.80
  -4  -1   0    0.40    0.70
   4   1   0    0.10    0.70
   4   1   0    0.20    0.70
   4   1   0    0.40    1.10
   4   1   0    1.00    0.80
   4   1   0    0.00    0.60
   4   1   0    1.20    0.60
   4   1   0    0.20    1.00
   4   1   0    0.50    0.90
  -5  -1   0   11.30    1.30
  -5  -1   0   11.30    1.20
   5   1   0   10.60    1.20
   5   1   0   10.70    1.30
   5   1   0   11.40    1.60
   5   1   0   12.50    1.00
   5   1   0   13.20    1.50
   5   1   0   11.70    1.00
   5   1   0   11.00    1.30
  -6  -1   0    8.40    1.20
  -6  -1   0   10.30    1.40
  -6  -1   0   10.50    1.00
   6   1   0    9.40    1.00
   6   1   0    9.70    1.20
   6   1   0   11.00    1.30
   6   1   0    9.00    1.00
   6   1   0    7.60    1.50
   6   1   0   10.30    1.50
   6   1   0    9.20    1.50
   6   1   0    8.40    1.50
  -7  -1   0   19.10    1.70
  -7  -1   0   18.30    1.40
  -7  -1   0   12.20    1.60
   7   1   0   20.50    2.00
   7   1   0   16.20    1.70
   7   1   0   17.20    1.40
   7   1   0   17.50    2.00
   7   1   0   17.00    2.00
   7   1   0   16.40    1.60
   7   1   0   15.10    1.80
   7   1   0   19.00    1.40
  -8  -1   0   -0.20    1.00
  -8  -1   0   -1.60    0.80
  -8  -1   0    0.50    1.10
   8   1   0   -0.30    0.90
   8   1   0   -0.20    0.80
   8   1   0   -0.30    1.40
   8   1   0   -0.40    0.80
   8   1   0   -0.30    1.10
   8   1   0   -1.20    1.30
   8   1   0   -0.70    1.30
   8   1   0    0.30    1.30
  -9  -1   0    7.40    1.00
  -9  -1   0    7.80    1.50
  -9  -1   0    8.10    1.60
   9   1   0    6.40    1.70
   9   1   0   11.70    1.90
   9   1   0    7.20    1.90
   9   1   0    7.60    1.10
   9   1   0    5.00    1.40
   9   1   0    9.70    1.90
   9   1   0    8.30    1.00
   9   1   0    6.40    1.60
 -10  -1   0    2.60    1.50
 -10  -1   0    3.10    1.40
 -10  -1   0    2.20    0.90
  10   1   0    2.90    1.00
  10   1   0    0.60    1.10
  10   1   0    4.40    1.90
  10   1   0    3.60    1.70
  10   1   0    1.50    1.30
  10   1   0    5.70    2.00
  10   1   0    1.80    1.40
 -11  -1   0    4.60    1.70
 -11  -1   0    9.60    2.00
  11   1   0    5.60    1.90
  11   1   0    6.30    2.20
  11   1   0    8.60    1.80
  11   1   0    8.70    2.30
 -12  -1   0  229.28    9.50
 -12  -1   0  225.28    9.70
  12   1   0  221.18   10.60
  12   1   0  231.58    9.70
  12   1   0  242.28   10.80
  12   1   0  232.08   10.90
 -13  -1   0    3.40    1.90
 -13  -1   0    3.00    2.10
  13   1   0   -1.10    1.90
  13   1   0    2.10    1.90
  13   1   0    1.30    2.50
  13   1   0    1.50    2.30
 -14  -1   0   23.00    3.30
 -14  -1   0   28.20    3.30
  14   1   0   31.00    4.10
  14   1   0   35.80    3.70
  14   1   0   23.90    3.20
  14   1   0   31.00    3.90
 -15  -1   0   -1.60    2.10
 -15  -1   0   -0.70    2.20
  15   1   0    1.80    2.80
  15   1   0    2.60    2.30
  15   1   0    1.00    2.20
  15   1   0    1.10    2.20
 -16  -1   0    7.50    2.70
 -16  -1   0    2.60    2.50
  16   1   0    2.90    2.40
  16   1   0    0.90    3.30
  16   1   0    3.70    2.50
  16   1   0    0.80    2.30
  17   1   0    0.00    3.50
  17   1   0   -1.00    2.50
  17   1   0   -2.90    2.80
  16  -2   0   19.80    3.30
  16  -2   0   11.70    2.80
  16  -2   0   16.10    4.10
  16  -2   0   16.30    3.50
 -16   2   0   15.30    3.20
 -16   2   0   17.30    3.40
  15  -2   0   -1.20    2.00
  15  -2   0   -1.00    1.90
  15  -2   0    1.90    2.40
  15  -2   0   -2.10    2.40
 -15   2   0    1.60    2.20
 -15   2   0    1.20    2.40
  14  -2   0    1.50    1.80
  14  -2   0   -0.60    2.00
  14  -2   0   -1.30    2.10
  14  -2   0    3.50    2.30
 -14   2   0   -0.20    2.20
 -14   2   0    0.10    2.00
  13  -2   0    1.50    2.10
  13  -2   0    1.00    2.00
  13  -2   0    2.00    1.70
  13  -2   0    0.80    2.00
 -13   2   0    1.60    2.10
 -13   2   0    0.20    1.80
  12  -2   0    2.50    2.00
  12  -2   0    1.90    1.80
  12  -2   0    2.10    1.60
  12  -2   0    2.40    1.90
 -12   2   0    0.40    1.70
 -12   2   0    1.50    1.90
  11  -2   0    0.40    1.60
  11  -2   0    0.60    1.70
  11  -2   0   -0.20    1.90
  11  -2   0   -1.00    1.30
 -11   2   0    1.30    1.70
 -11   2   0    1.40    1.50
  10  -2   0   72.79    4.10
  10  -2   0   71.09    4.70
  10  -2   0   76.89    4.50
  10  -2   0   68.99    4.00
 -10   2   0   68.99    4.10
 -10   2   0   65.19    3.90
   9  -2   0    5.20    1.50
   9  -2   0    3.40    1.20
   9  -2   0    4.00    1.50
  -9   2   0    4.20    1.40
  -9   2   0    1.30    1.30
   8  -2   0   52.09    3.60
   8  -2   0   50.49    3.10
   8  -2   0   50.29    2.90
  -8   2   0   54.79    3.00
  -8   2   0   53.99    3.20
   7  -2   0   16.20    1.70
   7  -2   0   18.80    2.20
  -7   2   0   19.30    1.70
  -7   2   0   19.50    1.80
   6  -2   0    2.60    1.10
   6  -2   0    2.90    1.10
   6  -2   0    2.70    0.40
  -6   2   0    2.70    1.00
  -6   2   0    1.00    1.00
   5  -2   0  121.29    5.10
   5  -2   0  132.29    5.90
   5  -2   0  132.39    4.60
  -5   2   0  134.29    5.90
  -5   2   0  128.99    5.00
  -5   2   0  124.19    5.10
  -5   2   0  136.59    5.20
  -4   2   0  114.99    5.20
   2  -2   0  674.53   24.50
   2  -2   0  689.03   26.40
  -2   2   0  664.93   23.20
  -2   2   0  688.43   25.80
  -2   2   0  689.03   24.50
  -2   2   0  678.83   23.70
  -2   2   0  677.43   23.20
  -2   2   0  719.73   23.50
   1  -2   0  554.04   19.20
  -1   2   0  572.74   20.20
  -1   2   0  564.64   21.60
  -1   2   0  557.14   19.10
  -1   2   0  546.95   21.10
  -1   2   0  564.54   19.50
  -1   2   0  575.24   19.20
   0   2   0  464.65   17.00
   0   2   0  472.85   17.70
   0   2   0  474.85   18.10
   0   2   0  475.95   16.40
   1   2   0 1461.65   48.70
   1   2   0 1405.16   53.29
   1   2   0 1448.06   48.30
   1   2   0 1398.36   54.39
  -2  -2   0    5.50    0.60
  -2  -2   0    5.90    0.70
  -2  -2   0    6.40    0.70
   2   2   0    2.40    0.80
   2   2   0    5.00    0.80
   2   2   0    5.00    0.80
   2   2   0    4.70    0.80
   2   2   0    5.60    0.80
   2   2   0    3.40    0.90
   2   2   0    4.30    0.50
   2   2   0    5.70    0.70
  -3  -2   0 1057.39   36.90
  -3  -2   0 1071.29   36.60
   3   2   0 1099.19   38.60
   3   2   0 1019.40   36.60
   3   2   0 1092.19   43.10
   3   2   0 1085.59   40.40
   3   2   0 1093.09   37.40
   3   2   0 1081.59   37.00
   3   2   0 1119.59   41.20
  -4  -2   0   98.79    4.20
  -4  -2   0  107.29    4.10
   4   2   0  110.89    4.30
   4   2   0  105.79    4.10
   4   2   0  106.39    4.20
   4   2   0  103.09    4.60
   4   2   0  101.09    4.30
   4   2   0  106.09    4.50
   4   2   0  104.19    4.40
  -5  -2   0  102.29    4.30
  -5  -2   0   99.99    4.20
   5   2   0  106.69    4.30
   5   2   0   99.49    4.10
   5   2   0  104.19    4.50
   5   2   0  103.49    4.40
   5   2   0  106.89    4.70
   5   2   0  106.29    4.30
  -6  -2   0   10.00    1.20
  -6  -2   0   11.90    1.40
   6   2   0    9.90    1.20
   6   2   0    8.70    1.50
   6   2   0    9.10    1.60
   6   2   0   11.00    1.30
   6   2   0   11.10    1.50
   6   2   0    9.70    1.20
   6   2   0   10.40    1.20
  -7  -2   0   60.89    3.10
  -7  -2   0   61.89    3.30
  -7  -2   0   65.99    3.00
   7   2   0   67.29    3.60
   7   2   0   63.39    3.50
   7   2   0   67.19    3.50
   7   2   0   66.89    2.90
   7   2   0   57.69    3.20
   7   2   0   62.79    3.80
   7   2   0   68.29    3.00
   7   2   0   66.69    3.70
  -8  -2   0    5.50    1.30
  -8  -2   0    6.90    1.30
  -8  -2   0    8.00    1.20
   8   2   0    6.50    1.70
   8   2   0    6.40    1.30
   8   2   0    6.40    1.80
   8   2   0    9.60    1.80
   8   2   0    6.50    1.40
   8   2   0    5.70    1.10
   8   2   0    7.10    1.10
   8   2   0    6.10    1.60
  -9  -2   0   38.80    2.30
  -9  -2   0   35.60    2.80
  -9  -2   0   38.80    2.80
   9   2   0   46.30    3.30
   9   2   0   40.80    2.90
   9   2   0   41.20    3.10
   9   2   0   39.80    3.20
   9   2   0   42.10    2.30
   9   2   0   36.20    2.80
   9   2   0   43.80    3.20
   9   2   0   38.10    2.30
 -10  -2   0  108.09    4.60
 -10  -2   0  109.39    5.30
 -10  -2   0  114.99    5.20
  10   2   0  110.89    5.90
  10   2   0  120.09    5.60
  10   2   0  108.79    4.60
  10   2   0  108.09    4.60
  10   2   0  107.39    5.60
  10   2   0  104.39    5.30
  10   2   0  115.79    5.30
  10   2   0  107.09    5.70
 -11  -2   0   -0.70    1.30
 -11  -2   0    2.80    1.70
  11   2   0    0.40    1.50
  11   2   0    1.40    1.60
  11   2   0   -1.10    1.00
  11   2   0    0.10    1.80
  11   2   0    1.40    1.70
 -12  -2   0   56.99    4.20
 -12  -2   0   66.49    4.30
  12   2   0   64.19    4.60
  12   2   0   70.79    4.50
  12   2   0   61.79    4.30
  12   2   0   70.29    4.90
 -13  -2   0   14.40    2.70
 -13  -2   0   17.40    2.60
  13   2   0   16.50    2.80
  13   2   0   13.90    2.50
  13   2   0   19.70    3.20
  13   2   0   14.00    3.10
 -14  -2   0    9.10    2.60
 -14  -2   0   15.10    2.70
  14   2   0   11.70    2.60
  14   2   0    7.00    3.00
  14   2   0   10.90    2.50
  14   2   0   11.40    2.80
 -15  -2   0    4.90    2.50
 -15  -2   0    3.20    2.20
  15   2   0    4.70    2.40
  15   2   0    1.10    2.80
  15   2   0    3.50    2.80
  15   2   0    4.00    2.30
  16   2   0    9.50    3.50
  16   2   0   10.30    2.80
  16   2   0    7.30    3.60
  17   2   0   -0.50    3.10
  17   2   0    1.90    3.60
  17   2   0    0.40    2.40
  16  -3   0   -8.90    3.10
  16  -3   0   -1.60    2.30
  16  -3   0   -0.30    2.10
  16  -3   0   -0.60    2.60
 -16   3   0    2.60    2.70
 -16   3   0    2.70    2.60
  15  -3   0    5.30    2.80
  15  -3   0    6.30    3.30
  15  -3   0    2.80    2.40
  15  -3   0    2.80    2.00
 -15   3   0   -0.60    2.30
 -15   3   0    5.40    2.40
  14  -3   0    3.80    2.60
  14  -3   0    1.90    1.90
  14  -3   0   -0.90    2.10
  14  -3   0    0.20    2.50
 -14   3   0   -0.10    2.10
 -14   3   0    0.50    2.20
  13  -3   0    1.60    1.80
  13  -3   0    0.50    2.30
  13  -3   0    3.40    2.00
  13  -3   0    5.50    2.20
 -13   3   0    1.00    1.90
 -13   3   0    3.60    2.10
  12  -3   0    2.70    2.20
  12  -3   0    0.60    2.00
  12  -3   0    3.60    1.70
  12  -3   0    2.70    1.90
 -12   3   0    3.50    2.00
 -12   3   0    1.00    1.80
  11  -3   0   23.10    2.60
  11  -3   0   19.90    3.10
  11  -3   0   22.30    2.30
 -11   3   0   23.70    2.60
 -11   3   0   24.20    2.60
  10  -3   0   14.80    1.90
  10  -3   0   14.30    2.40
  10  -3   0   16.60    2.20
 -10   3   0   15.90    2.10
 -10   3   0   20.60    2.20
   9  -3   0   24.90    2.30
   9  -3   0   24.20    2.60
   9  -3   0   22.00    2.00
  -9   3   0   27.30    2.30
  -9   3   0   22.50    2.30
   8  -3   0   15.00    2.00
   8  -3   0   17.20    1.90
  -8   3   0   18.60    1.80
  -8   3   0   14.90    1.80
   7  -3   0   21.70    2.30
   7  -3   0   23.30    1.90
  -7   3   0   20.70    1.90
  -7   3   0   20.10    1.80
  -7   3   0   25.40    2.00
   6  -3   0    5.30    1.00
   6  -3   0    3.10    1.20
   6  -3   0    2.50    0.50
  -6   3   0    2.80    1.00
  -6   3   0    2.10    1.10
  -6   3   0    4.70    1.20
  -6   3   0    2.10    1.30
  -6   3   0    3.30    1.00
   5  -3   0   -0.70    0.80
   5  -3   0   -1.10    0.50
   5  -3   0    0.00    0.30
  -5   3   0   -0.30    1.00
  -5   3   0   -0.10    0.90
  -5   3   0    0.40    0.70
  -5   3   0    1.00    1.00
  -5   3   0   -0.40    0.70
   4  -3   0    2.40    0.60
   4  -3   0    1.80    0.60
   4  -3   0    0.30    0.60
   4  -3   0    0.60    0.50
  -4   3   0    0.80    0.70
  -4   3   0    0.30    0.90
  -4   3   0    0.10    0.20
  -4   3   0    0.70    0.90
  -4   3   0   -0.10    0.30
   3  -3   0   -0.40    0.40
   3  -3   0   -0.90    0.80
   3  -3   0    0.20    0.70
   3  -3   0   -0.80    0.80
  -3   3   0    0.00    0.70
  -3   3   0    0.30    0.80
  -3   3   0   -0.30    0.50
  -3   3   0    0.70    0.70
  -3   3   0    0.10    0.40
  -3   3   0   -0.10    0.20
   2  -3   0   34.10    2.10
   2  -3   0   33.50    1.70
   2  -3   0   30.40    1.40
  -2   3   0   30.60    1.40
  -2   3   0   31.10    1.60
  -2   3   0   30.50    2.00
  -2   3   0   32.20    1.70
  -2   3   0   34.50    2.00
  -2   3   0   31.50    1.40
  -2   3   0   31.70    1.70
  -2   3   0   29.60    1.30
   1  -3   0   11.80    0.60
  -1   3   0   10.10    1.10
  -1   3   0   10.30    0.60
  -1   3   0   11.90    1.10
  -1   3   0   11.00    1.20
  -1   3   0   11.30    1.20
  -1   3   0    9.60    0.60
  -1   3   0    9.10    0.60
   0   3   0   22.50    1.70
   0   3   0   23.00    1.60
   0   3   0   22.30    1.60
   0   3   0   22.70    1.50
   1   3   0   28.50    1.10
   1   3   0   28.00    1.10
   1   3   0   28.30    1.70
   1   3   0   29.20    1.30
   1   3   0   27.00    1.80
   1   3   0   28.50    1.20
  -2  -3   0  136.59    5.00
   2   3   0  143.29    5.10
   2   3   0  144.19    5.20
   2   3   0  130.19    5.30
   2   3   0  142.59    5.80
   2   3   0  142.79    5.00
   2   3   0  143.39    5.60
   2   3   0  139.09    5.70
  -3  -3   0    9.90    1.00
  -3  -3   0    8.80    1.00
  -3  -3   0    9.70    1.10
   3   3   0   10.40    0.80
   3   3   0   11.40    1.30
   3   3   0   13.10    1.30
   3   3   0   10.00    1.10
   3   3   0    9.10    1.20
   3   3   0   10.90    1.20
   3   3   0    9.30    1.30
  -4  -3   0   -0.20    0.90
  -4  -3   0    0.70    0.80
   4   3   0    1.10    0.90
   4   3   0    0.60    0.90
   4   3   0    1.90    1.00
   4   3   0   -1.50    1.10
   4   3   0   -1.40    1.00
   4   3   0    2.60    1.00
   4   3   0    0.40    0.70
  -5  -3   0    9.00    1.20
  -5  -3   0    8.60    1.20
   5   3   0    7.00    1.10
   5   3   0    8.10    1.30
   5   3   0   11.30    1.30
   5   3   0    7.50    1.30
   5   3   0    8.50    1.40
   5   3   0    8.10    1.30
  -6  -3   0   16.30    1.60
  -6  -3   0   14.90    1.50
   6   3   0   13.60    1.70
   6   3   0   17.30    1.60
   6   3   0   14.30    1.70
   6   3   0   16.60    1.80
   6   3   0   16.20    1.50
   6   3   0   16.70    1.60
   6   3   0   15.90    1.50
  -7  -3   0   -0.10    1.00
  -7  -3   0    0.30    1.10
  -7  -3   0   -0.10    1.00
   7   3   0   -0.80    1.00
   7   3   0    0.40    0.80
   7   3   0   -0.10    1.30
   7   3   0   -0.40    1.40
   7   3   0    0.60    1.10
   7   3   0   -2.10    0.90
   7   3   0   -4.40    1.30
  -8  -3   0   10.50    1.40
  -8  -3   0   11.70    1.70
  -8  -3   0   12.60    1.60
   8   3   0   10.80    1.40
   8   3   0   10.70    1.90
   8   3   0    3.60    1.20
   8   3   0    7.80    1.90
   8   3   0   12.80    1.40
   8   3   0   10.10    1.90
   8   3   0    9.40    1.80
  -9  -3   0    5.30    1.50
  -9  -3   0    6.40    1.60
  -9  -3   0    4.20    1.20
   9   3   0    4.20    1.20
   9   3   0    5.90    1.60
   9   3   0    4.90    1.60
   9   3   0    8.00    1.90
   9   3   0    7.20    1.90
   9   3   0    6.30    1.30
   9   3   0    6.50    1.70
 -10  -3   0   -1.00    1.30
 -10  -3   0   -1.30    1.00
 -10  -3   0   -0.60    1.30
  10   3   0    0.30    1.80
  10   3   0   -0.50    1.10
  10   3   0    3.50    1.80
  10   3   0   -1.30    1.60
  10   3   0   -0.50    0.70
  10   3   0    0.00    1.10
  10   3   0   -1.50    1.50
  10   3   0   -2.20    1.30
 -11  -3   0   23.90    2.50
 -11  -3   0   26.40    2.60
  11   3   0   24.60    2.90
  11   3   0   24.30    2.90
  11   3   0   22.10    2.00
  11   3   0   24.80    3.00
  11   3   0   16.50    2.10
  11   3   0   22.60    2.00
  11   3   0   21.30    2.60
  11   3   0   20.70    2.50
 -12  -3   0   -0.50    1.70
 -12  -3   0   -0.80    1.60
  12   3   0   -1.40    1.90
  12   3   0   -0.10    1.50
  12   3   0   -0.40    1.70
  12   3   0   -0.70    1.80
 -13  -3   0   43.60    3.90
 -13  -3   0   39.40    3.60
  13   3   0   42.20    3.70
  13   3   0   39.60    4.30
  13   3   0   38.00    4.20
  13   3   0   40.40    3.70
 -14  -3   0   -2.70    1.90
 -14  -3   0   -1.60    2.10
  14   3   0   -1.90    2.60
  14   3   0    0.50    1.80
  14   3   0    1.90    2.30
  14   3   0    0.30    2.10
 -15  -3   0   16.50    3.10
  15   3   0   17.90    3.60
  15   3   0   14.30    3.50
  15   3   0   17.20    2.80
  16   3   0   -1.00    2.10
  16   3   0   -2.60    3.10
  16   3   0   -1.30    3.00
  17   3   0    0.90    2.50
  17   3   0    2.00    2.90
  17   3   0    0.90    3.60
  15  -4   0   16.50    2.80
  15  -4   0    9.30    2.70
  15  -4   0    9.00    3.20
  15  -4   0   11.70    3.30
 -15   4   0   14.80    3.00
 -15   4   0   11.90    3.00
  14  -4   0    3.60    2.20
  14  -4   0    3.00    1.90
  14  -4   0   -1.00    2.50
  14  -4   0   -3.60    1.80
 -14   4   0   -2.30    2.00
 -14   4   0   -0.20    2.20
  13  -4   0    3.50    2.10
  13  -4   0    4.00    2.60
  13  -4   0    5.20    2.00
  13  -4   0    0.70    2.30
 -13   4   0    3.90    2.20
 -13   4   0    2.40    2.00
  12  -4   0   38.50    3.50
  12  -4   0   44.30    4.50
  12  -4   0   44.80    3.60
 -12   4   0   51.79    3.80
 -12   4   0   44.40    3.60
  11  -4   0   -0.80    1.60
  11  -4   0   -1.70    1.20
  11  -4   0   -2.30    1.70
 -11   4   0    0.60    1.60
 -11   4   0    1.80    1.60
  10  -4   0    1.90    1.60
  10  -4   0    1.30    1.60
  10  -4   0    0.80    1.10
 -10   4   0    4.30    1.50
 -10   4   0    4.00    1.70
   9  -4   0   68.19    4.50
   9  -4   0   71.49    3.90
  -9   4   0   76.19    4.00
  -9   4   0   74.49    3.80
   8  -4   0   -0.20    0.90
   8  -4   0   -0.20    1.20
  -8   4   0    0.50    1.20
  -8   4   0    1.20    1.10
   7  -4   0   32.50    2.30
   7  -4   0   31.20    1.40
  -7   4   0   30.80    2.30
  -7   4   0   31.60    2.30
  -7   4   0   32.70    2.30
  -7   4   0   31.40    2.20
  -7   4   0   26.20    2.60
   6  -4   0    0.40    0.40
   6  -4   0   -0.30    0.80
   6  -4   0    0.40    0.50
  -6   4   0    2.20    0.80
  -6   4   0   -0.30    0.90
  -6   4   0    2.30    1.10
  -6   4   0    0.60    1.00
  -6   4   0   -0.20    0.40
   5  -4   0  141.29    6.50
   5  -4   0  131.09    5.50
   5  -4   0  144.79    5.40
   5  -4   0  145.79    5.30
  -5   4   0  150.08    5.60
  -5   4   0  153.18    5.70
  -5   4   0  144.59    5.60
   4  -4   0  655.23   26.40
   4  -4   0  686.43   24.20
   4  -4   0  672.73   23.50
  -4   4   0  667.73   23.00
  -4   4   0  673.83   23.40
  -4   4   0  653.83   26.30
  -4   4   0  687.63   23.10
  -4   4   0  689.53   24.20
   3  -4   0   14.60    1.50
   3  -4   0   15.90    1.20
   3  -4   0   13.70    1.00
  -3   4   0   14.40    1.30
  -3   4   0   14.70    1.10
  -3   4   0   10.40    1.40
  -3   4   0   15.30    1.20
  -3   4   0   13.20    1.00
   2  -4   0  741.23   25.60
   2  -4   0  725.53   28.90
   2  -4   0  754.22   26.90
  -2   4   0  742.13   26.10
  -2   4   0  732.63   28.30
  -2   4   0  776.52   25.60
  -2   4   0  769.32   27.00
  -1   4   0   83.19    3.50
  -1   4   0   79.99    3.90
  -1   4   0   86.99    3.70
  -1   4   0   85.19    3.90
   0   4   0   14.00    1.40
   0   4   0   12.30    1.40
   0   4   0   14.70    1.50
   0   4   0   15.30    1.40
  -1  -4   0 1416.06   47.90
   1   4   0 1427.56   52.49
   1   4   0 1378.36   53.49
   1   4   0 1477.65   50.29
   1   4   0 1307.47   48.70
   1   4   0 1466.95   47.70
   1   4   0 1363.66   47.70
   2   4   0 4666.73  150.58
   2   4   0 4960.40  151.68
   2   4   0 4564.24  165.48
   2   4   0 4137.69  150.48
   2   4   0 4577.14  168.98
   2   4   0 3897.61  153.58
  -3  -4   0 3086.09  104.39
  -3  -4   0 3126.39  123.19
   3   4   0 3073.29  105.29
   3   4   0 2966.60  104.39
   3   4   0 3131.49  110.39
   3   4   0 3198.38  105.29
   3   4   0 3111.89  115.19
   3   4   0 3083.79  117.49
   3   4   0 3130.09  104.39
   3   4   0 3100.79  106.89
  -4  -4   0  304.17   10.50
  -4  -4   0  302.87   10.70
  -4  -4   0  302.87   12.30
   4   4   0  299.77   11.90
   4   4   0  306.77   12.10
   4   4   0  292.97   10.80
   4   4   0  304.57   11.30
   4   4   0  283.37   10.60
   4   4   0  298.37   11.80
   4   4   0  293.07   10.90
  -5  -4   0   15.00    1.40
  -5  -4   0   14.60    1.40
   5   4   0   11.50    1.10
   5   4   0   14.90    1.50
   5   4   0   11.10    1.50
   5   4   0   14.20    1.60
   5   4   0   16.10    1.60
   5   4   0   14.20    1.50
  -6  -4   0   34.20    2.10
  -6  -4   0   38.60    2.40
   6   4   0   33.00    2.20
   6   4   0   31.30    2.60
   6   4   0   34.60    2.60
   6   4   0   35.80    2.30
   6   4   0   38.50    2.40
   6   4   0   34.90    2.60
   6   4   0   34.70    2.20
  -7  -4   0  579.64   20.50
  -7  -4   0  597.74   20.70
   7   4   0  606.24   20.90
   7   4   0  608.14   20.80
   7   4   0  555.74   22.70
   7   4   0  585.64   20.90
   7   4   0  575.04   23.80
   7   4   0  564.04   21.50
   7   4   0  577.14   20.60
   7   4   0  589.84   23.10
  -8  -4   0   71.49    3.60
  -8  -4   0   67.89    3.60
   8   4   0   65.99    4.10
   8   4   0   73.09    3.50
   8   4   0   68.59    3.60
   8   4   0   62.89    4.10
   8   4   0   71.19    3.80
   8   4   0   69.69    4.00
   8   4   0   71.69    4.00
   8   4   0   77.39    3.70
  -9  -4   0   21.10    2.00
  -9  -4   0   22.10    2.20
  -9  -4   0   29.60    2.30
   9   4   0   23.20    2.00
   9   4   0   22.40    2.10
   9   4   0   25.30    2.60
   9   4   0   23.10    2.70
   9   4   0   23.30    2.40
   9   4   0   24.60    2.50
   9   4   0   23.20    2.00
 -10  -4   0  262.27   10.20
 -10  -4   0  257.27   10.10
 -10  -4   0  252.47   10.30
  10   4   0  277.97   10.50
  10   4   0  252.37   10.20
  10   4   0  265.47   11.50
  10   4   0  257.07   10.50
  10   4   0  264.17   10.30
  10   4   0  260.97   11.40
  10   4   0  262.47   10.00
  10   4   0  256.07   11.30
 -11  -4   0   -1.00    1.20
 -11  -4   0    1.30    1.50
 -11  -4   0    2.30    1.70
  11   4   0   -1.50    2.00
  11   4   0    2.70    1.40
  11   4   0   -1.00    1.80
  11   4   0    0.60    1.20
  11   4   0   -0.80    1.30
  11   4   0    4.20    2.00
  11   4   0   -0.60    1.50
  11   4   0    1.50    2.00
 -12  -4   0    1.30    1.70
 -12  -4   0    2.40    1.50
 -12  -4   0    1.40    1.80
  12   4   0    1.60    1.70
  12   4   0   -0.90    2.30
  12   4   0   -1.20    2.10
  12   4   0    1.70    1.40
  12   4   0    4.10    1.80
 -13  -4   0   10.30    2.40
 -13  -4   0    7.50    2.10
  13   4   0    9.60    2.20
  13   4   0    7.50    2.80
  13   4   0    6.20    2.20
  13   4   0    8.30    2.90
  14   4   0   30.60    3.40
  14   4   0   34.30    4.40
  14   4   0   35.50    4.40
  15   4   0   69.99    5.30
  15   4   0   69.29    5.90
  15   4   0   69.19    5.90
  16   4   0   14.50    3.10
  16   4   0   15.90    3.80
  16   4   0   15.20    3.90
  17   4   0    0.10    2.90
  17   4   0    9.70    3.20
  17   4   0    4.80    3.60
  15  -5   0    0.90    2.80
  15  -5   0    1.80    3.20
  15  -5   0    1.30    2.30
  15  -5   0    1.40    2.10
 -15   5   0    2.50    2.60
 -15   5   0    5.00    2.60
  14  -5   0    2.00    2.00
  14  -5   0    1.70    2.50
  14  -5   0    1.20    2.30
  14  -5   0    1.40    2.10
 -14   5   0    1.00    2.30
 -14   5   0    1.90    2.40
  13  -5   0    5.10    1.90
  13  -5   0    1.90    2.70
  13  -5   0    2.70    2.10
  13  -5   0    6.70    2.20
 -13   5   0    6.80    2.30
 -13   5   0    4.00    2.20
  12  -5   0    1.90    2.00
  12  -5   0    0.60    1.50
  12  -5   0    1.60    1.80
 -12   5   0   -0.20    1.90
 -12   5   0    1.00    1.80
  11  -5   0    0.50    1.30
  11  -5   0   -0.50    1.70
  11  -5   0   -0.80    1.60
 -11   5   0    3.80    1.70
 -11   5   0    0.10    1.70
  10  -5   0   -0.30    1.50
  10  -5   0   -1.50    1.50
 -10   5   0    0.60    1.60
 -10   5   0   -0.20    1.40
   9  -5   0   -0.80    1.50
   9  -5   0   -0.40    1.40
  -9   5   0    1.80    1.30
  -9   5   0    2.00    1.50
   8  -5   0    8.50    1.50
  -8   5   0    5.60    1.50
  -8   5   0    9.10    1.50
   7  -5   0   -0.30    0.60
   7  -5   0    1.10    1.00
   7  -5   0    0.80    0.60
  -7   5   0   -0.10    0.60
  -7   5   0   -1.00    0.60
  -7   5   0    2.00    1.10
  -7   5   0    3.40    1.10
  -7   5   0    2.40    1.20
   6  -5   0    0.20    0.60
   6  -5   0    0.70    1.20
   6  -5   0    0.30    0.70
   6  -5   0    1.30    0.70
  -6   5   0    0.20    0.30
  -6   5   0   -0.60    1.00
  -6   5   0    0.10    1.00
  -6   5   0    1.20    0.80
  -6   5   0   -1.10    0.80
   5  -5   0    3.10    0.80
   5  -5   0    0.40    1.10
   5  -5   0    0.20    0.40
   5  -5   0    3.10    0.90
  -5   5   0    0.30    0.20
  -5   5   0    1.00    0.90
  -5   5   0    1.70    0.80
  -5   5   0    1.60    1.00
  -5   5   0    2.80    1.30
   4  -5   0    8.50    1.00
   4  -5   0    8.60    1.10
   4  -5   0    8.90    1.20
   4  -5   0    8.00    1.60
  -4   5   0    8.90    0.90
  -4   5   0    8.00    1.00
  -4   5   0    8.60    1.50
  -4   5   0    6.80    1.10
  -4   5   0    7.20    0.90
  -4   5   0    8.00    1.10
   3  -5   0    2.70    0.90
   3  -5   0    3.30    0.70
   3  -5   0    2.10    1.20
  -3   5   0    2.00    0.70
  -3   5   0    3.20    0.70
  -3   5   0    3.30    1.10
  -3   5   0    3.40    1.30
  -3   5   0    3.30    1.30
  -3   5   0    2.80    0.60
  -3   5   0    3.20    1.00
  -3   5   0    2.40    0.80
   2  -5   0   25.20    1.20
   2  -5   0   26.10    1.80
   2  -5   0   24.30    1.90
  -2   5   0   27.30    1.90
  -2   5   0   28.20    1.90
  -2   5   0   26.80    1.40
  -1   5   0    8.00    1.30
  -1   5   0    9.80    1.30
  -1   5   0    9.00    1.30
  -1   5   0    6.60    1.30
   0   5   0   50.19    2.60
   0   5   0   47.70    2.70
   0   5   0   53.59    2.60
   0   5   0   44.90    2.70
  -1  -5   0   95.59    3.50
   1   5   0   98.99    4.40
   1   5   0  103.99    4.30
   1   5   0  102.49    4.20
   1   5   0   94.99    4.50
   1   5   0   94.29    3.50
   1   5   0  100.09    3.50
  -2  -5   0    1.40    0.70
   2   5   0   -0.80    0.30
   2   5   0    1.70    1.20
   2   5   0   -0.30    0.30
   2   5   0    1.10    0.50
   2   5   0    1.10    0.60
   2   5   0    1.10    1.10
   2   5   0    0.50    0.70
   2   5   0   -0.10    0.30
   3   5   0   34.50    2.30
   3   5   0   35.00    2.30
   3   5   0   34.80    1.80
   3   5   0   32.30    2.20
   3   5   0   32.00    1.90
   3   5   0   35.70    2.40
   3   5   0   35.60    2.00
  -4  -5   0   47.10    2.30
  -4  -5   0   47.60    2.20
   4   5   0   43.00    2.50
   4   5   0   47.80    2.60
   4   5   0   44.90    2.60
   4   5   0   40.90    2.30
   4   5   0   33.20    2.50
   4   5   0   46.90    2.30
   4   5   0   39.50    2.40
  -5  -5   0    5.20    1.10
  -5  -5   0    4.90    1.00
   5   5   0    2.60    1.30
   5   5   0    4.80    1.30
   5   5   0    5.50    1.30
   5   5   0    4.10    1.40
   5   5   0    4.00    1.20
   5   5   0    4.40    1.30
  -6  -5   0   24.50    1.90
  -6  -5   0   23.60    1.90
   6   5   0   27.10    2.50
   6   5   0   23.00    2.10
   6   5   0   29.50    2.30
   6   5   0   23.80    1.90
   6   5   0   27.50    2.10
  -7  -5   0   11.30    1.50
  -7  -5   0    9.30    1.40
   7   5   0   10.70    1.50
   7   5   0   12.10    1.70
   7   5   0   10.40    1.50
   7   5   0   10.90    1.70
   7   5   0   11.50    1.80
   7   5   0    9.20    1.50
  -8  -5   0    2.10    1.30
  -8  -5   0   -1.10    1.20
  -8  -5   0    0.40    1.00
   8   5   0    0.50    1.40
   8   5   0   10.50    2.50
   8   5   0    2.60    1.70
   8   5   0    3.60    1.30
   8   5   0    6.20    1.60
   8   5   0    2.60    1.30
   8   5   0    0.50    1.50
   8   5   0    8.70    2.40
  -9  -5   0    9.00    1.70
  -9  -5   0   11.10    1.60
  -9  -5   0   11.40    1.80
   9   5   0   12.10    1.80
   9   5   0   11.30    1.70
   9   5   0    9.60    1.60
   9   5   0   10.20    2.00
   9   5   0   10.10    2.00
   9   5   0   13.90    2.20
   9   5   0    8.70    2.20
   9   5   0   14.10    1.80
 -10  -5   0    0.70    1.40
 -10  -5   0   -1.70    1.30
 -10  -5   0    1.40    1.40
  10   5   0    0.40    1.40
  10   5   0    2.40    1.70
  10   5   0    0.20    1.30
  10   5   0    1.40    1.80
  10   5   0    1.70    1.90
  10   5   0   -1.70    0.90
  10   5   0    0.50    1.70
  10   5   0    2.30    1.40
 -11  -5   0   12.80    2.10
 -11  -5   0   17.00    2.30
 -11  -5   0   16.60    2.10
  11   5   0   15.10    2.80
  11   5   0   15.00    2.10
  11   5   0   17.70    2.30
  11   5   0   18.50    2.70
  11   5   0   16.50    2.00
  11   5   0   17.40    2.10
  11   5   0   15.80    2.60
  11   5   0   20.50    2.70
 -12  -5   0   14.60    2.00
 -12  -5   0   17.80    2.50
 -12  -5   0   15.50    2.30
  12   5   0   18.10    3.10
  12   5   0   17.70    2.10
  12   5   0   16.30    2.70
  12   5   0   13.80    2.10
  12   5   0   12.30    2.20
  12   5   0   16.00    2.40
  12   5   0   14.30    2.80
  12   5   0   17.00    3.00
  13   5   0   -0.40    1.80
  13   5   0   -1.40    2.40
  13   5   0    3.50    2.60
  14   5   0   22.30    2.90
  14   5   0   17.70    3.80
  14   5   0   21.70    3.50
  15   5   0    6.50    2.80
  15   5   0   15.10    2.90
  15   5   0   18.80    3.70
  16   5   0    6.70    2.60
  16   5   0    5.70    3.70
  16   5   0    3.10    2.80
  17   5   0   -2.90    3.30
  17   5   0    2.10    3.50
  17   5   0    1.60    2.70
  18   5   0  -16.80    4.30
  18   5   0    9.60    3.70
  18   5   0    2.10    3.70
  14  -6   0    5.70    2.40
  14  -6   0    5.00    2.80
  14  -6   0    6.20    2.90
 -14   6   0    8.90    2.60
 -14   6   0    9.70    2.60
  13  -6   0    9.10    3.10
  13  -6   0    4.00    2.10
 -13   6   0    5.20    2.30
 -13   6   0    4.80    2.30
  12  -6   0   12.80    2.90
  12  -6   0    7.80    2.20
 -12   6   0   14.30    2.40
 -12   6   0    8.90    2.30
  11  -6   0   -1.30    1.80
  11  -6   0   -2.30    1.50
 -11   6   0    1.70    1.80
 -11   6   0   -1.50    1.50
  10  -6   0   -1.20    1.40
  10  -6   0   -2.10    1.70
 -10   6   0    0.50    1.50
 -10   6   0   -0.90    1.40
   9  -6   0    1.10    1.40
   9  -6   0    0.50    1.40
  -9   6   0    1.10    1.30
  -9   6   0    1.20    1.50
   8  -6   0   10.10    1.60
   8  -6   0    8.70    1.90
  -8   6   0    7.40    2.00
  -8   6   0    8.70    1.40
  -8   6   0    6.60    1.60
   6  -6   0  133.39    6.80
   6  -6   0  135.79    5.40
   6  -6   0  140.99    5.40
  -6   6   0  147.19    5.70
  -6   6   0  134.09    6.70
  -6   6   0  138.19    5.60
   5  -6   0    1.40    0.90
   5  -6   0    1.00    1.20
   5  -6   0    0.50    0.80
   5  -6   0    1.30    0.90
  -5   6   0    0.60    0.70
  -5   6   0    1.00    0.70
  -5   6   0   -0.20    0.90
  -5   6   0   -1.00    0.80
  -5   6   0    0.00    1.30
  -5   6   0    0.50    0.90
   4  -6   0   21.50    1.70
   4  -6   0   20.00    1.60
   4  -6   0   19.50    1.40
   4  -6   0   18.10    2.10
  -4   6   0   13.40    1.80
  -4   6   0   19.40    2.20
  -4   6   0   17.80    1.40
  -4   6   0   18.10    1.30
  -4   6   0   20.30    1.60
  -4   6   0   18.50    1.40
  -4   6   0   18.10    1.40
   3  -6   0  137.19    6.50
   3  -6   0  147.99    5.90
   3  -6   0  143.09    5.30
  -3   6   0  154.78    5.20
  -3   6   0  142.29    5.10
  -3   6   0  147.29    5.40
  -3   6   0  149.69    5.80
  -3   6   0  139.69    6.50
  -3   6   0  145.39    5.30
  -3   6   0  138.59    6.60
  -3   6   0  149.79    5.90
   2  -6   0   36.60    2.20
   2  -6   0   36.20    2.60
   2  -6   0   34.80    1.50
  -2   6   0   36.80    1.60
  -2   6   0   32.50    2.40
  -2   6   0   33.80    2.30
  -2   6   0   37.40    2.30
  -2   6   0   37.20    1.60
  -2   6   0   35.70    2.60
   1  -6   0   27.20    2.10
  -1   6   0   27.70    2.20
  -1   6   0   23.90    1.90
   0   6   0    9.40    1.40
   0   6   0    7.70    1.40
   0   6   0   14.50    1.50
   0   6   0    7.00    1.30
  -1  -6   0   20.90    1.10
   1   6   0   23.40    2.00
   1   6   0   23.90    2.10
   1   6   0   25.50    1.20
  -2  -6   0    2.40    0.60
   2   6   0    0.70    1.10
   2   6   0    2.00    0.60
   2   6   0    0.20    0.80
   2   6   0    0.60    0.50
   2   6   0    1.90    0.70
   2   6   0    2.70    1.20
   2   6   0    0.80    0.80
   2   6   0    0.10    0.40
  -3  -6   0    6.20    0.90
   3   6   0    5.50    1.40
   3   6   0    2.00    1.10
   3   6   0    3.90    1.10
   3   6   0    5.90    1.20
   3   6   0    7.10    1.00
   3   6   0    5.70    0.90
   3   6   0    1.90    0.60
   4   6   0  610.04   20.20
   4   6   0  575.44   21.60
   4   6   0  587.14   21.00
   4   6   0  562.34   20.40
   4   6   0  575.34   20.20
   4   6   0  592.64   20.40
   4   6   0  590.04   22.80
  -5  -6   0   12.10    1.20
   5   6   0   14.30    1.90
   5   6   0   12.10    1.60
   5   6   0   13.50    1.80
   5   6   0   14.90    1.90
   5   6   0   11.50    1.40
   5   6   0   12.70    1.70
  -6  -6   0  209.38    7.80
  -6  -6   0  206.98    7.60
   6   6   0  196.08    7.80
   6   6   0  190.68    8.00
   6   6   0  203.88    8.30
   6   6   0  203.28    7.90
   6   6   0  210.98    8.80
  -7  -6   0   12.20    1.60
  -7  -6   0   10.40    1.40
   7   6   0   11.50    1.70
   7   6   0   12.70    2.00
   7   6   0    8.30    1.70
   7   6   0    9.20    1.70
   7   6   0   11.80    1.70
   7   6   0   12.40    2.10
  -8  -6   0  628.24   21.70
  -8  -6   0  616.84   23.00
  -8  -6   0  610.64   22.00
   8   6   0  604.14   21.90
   8   6   0  615.34   25.10
   8   6   0  618.94   22.30
   8   6   0  631.34   22.10
   8   6   0  615.34   22.20
   8   6   0  593.44   24.10
   8   6   0  637.54   24.50
   8   6   0  622.94   23.10
  -9  -6   0   11.20    1.70
  -9  -6   0   10.00    1.90
  -9  -6   0   13.20    1.80
   9   6   0   11.00    1.80
   9   6   0   10.70    1.50
   9   6   0   12.60    1.80
   9   6   0   10.70    2.40
   9   6   0   11.60    2.00
   9   6   0   10.20    2.20
   9   6   0    9.90    1.90
   9   6   0   11.20    2.10
 -10  -6   0    4.80    1.50
 -10  -6   0    4.00    1.60
 -10  -6   0    4.00    1.70
  10   6   0    2.50    1.60
  10   6   0    6.00    2.00
  10   6   0    5.20    1.90
  10   6   0    6.80    1.70
  10   6   0    3.80    1.40
  10   6   0    5.50    1.50
  10   6   0    2.50    2.20
  10   6   0    4.00    2.00
 -11  -6   0    0.30    1.50
 -11  -6   0    0.90    1.60
 -11  -6   0    1.20    1.60
  11   6   0   -0.50    1.00
  11   6   0    3.90    2.00
  11   6   0    2.60    2.10
  11   6   0    0.10    1.40
  11   6   0    4.00    1.70
  11   6   0    3.60    1.60
  11   6   0    3.80    2.40
  11   6   0    1.30    2.10
 -12  -6   0   54.19    3.60
  12   6   0   57.69    4.90
  12   6   0   52.79    4.20
  12   6   0   53.19    4.40
  12   6   0   54.39    4.40
  12   6   0   54.49    3.70
  12   6   0   52.89    3.70
  12   6   0   54.29    4.00
 -13  -6   0    6.70    2.00
  13   6   0   13.70    3.00
  13   6   0   10.40    2.30
  13   6   0   12.00    2.80
  13   6   0   12.60    3.30
  13   6   0    6.00    2.90
  13   6   0   10.50    2.20
  14   6   0   10.30    2.50
  14   6   0    7.30    2.90
  14   6   0    7.60    3.50
  15   6   0    5.70    3.10
  15   6   0    5.10    2.40
  15   6   0    1.90    3.00
  16   6   0    7.40    3.20
  16   6   0   11.30    2.90
  16   6   0   10.40    3.90
  17   6   0    1.00    3.10
  17   6   0    2.10    2.90
  17   6   0    0.90    3.50
  18   6   0   18.80    4.20
  18   6   0    3.60    4.60
  18   6   0   -8.60    5.10
  14  -7   0    1.00    2.30
  14  -7   0    4.60    2.50
  14  -7   0   -0.20    2.80
 -14   7   0    1.20    2.30
 -14   7   0    1.90    2.50
  13  -7   0   -0.20    2.40
  13  -7   0   -1.00    1.90
 -13   7   0    0.30    2.10
 -13   7   0    0.30    2.10
  12  -7   0   -1.00    1.80
  12  -7   0    1.80    2.30
 -12   7   0    1.00    2.00
 -12   7   0    0.80    1.90
  11  -7   0    0.70    2.00
  11  -7   0    1.60    1.70
 -11   7   0    0.00    1.70
 -11   7   0    3.60    1.80
  10  -7   0    1.20    2.00
  10  -7   0    1.70    1.50
 -10   7   0    1.20    1.50
 -10   7   0    1.50    1.60
   9  -7   0    2.50    1.60
   9  -7   0   -1.40    1.30
  -9   7   0    0.50    1.20
  -9   7   0    0.10    1.40
   8  -7   0    3.20    1.30
   8  -7   0    4.20    2.00
  -8   7   0    4.00    1.40
  -8   7   0    2.50    2.00
  -8   7   0    3.80    1.10
   7  -7   0    4.40    2.00
   7  -7   0    2.70    0.90
  -7   7   0    3.40    1.10
  -7   7   0    5.60    2.00
  -7   7   0    2.50    0.90
   6  -7   0   -0.40    1.60
   6  -7   0    0.90    1.00
   6  -7   0    0.20    0.70
   6  -7   0    0.20    0.90
  -6   7   0   -1.20    1.00
  -6   7   0    0.90    0.90
  -6   7   0   -1.00    0.90
  -6   7   0    0.50    0.60
  -6   7   0   -0.50    1.30
   5  -7   0   21.10    1.80
   5  -7   0   16.70    1.50
   5  -7   0   19.70    1.70
   5  -7   0   18.00    2.40
  -5   7   0   15.80    1.50
  -5   7   0   17.50    2.30
  -5   7   0   16.60    1.40
  -5   7   0   18.40    1.40
  -5   7   0   18.20    1.60
  -5   7   0   18.90    1.50
   4  -7   0   -0.60    0.70
   4  -7   0    0.30    1.10
   4  -7   0    1.20    1.20
  -4   7   0   -1.10    0.70
  -4   7   0    1.30    1.40
  -4   7   0   -1.60    0.70
  -4   7   0   -1.40    0.70
  -4   7   0    1.20    1.00
  -4   7   0   -0.30    1.00
  -4   7   0   -1.10    0.70
  -4   7   0   -0.90    1.40
   3  -7   0   10.00    1.40
   3  -7   0    9.20    1.70
   3  -7   0   10.30    0.90
  -3   7   0    8.60    1.50
  -3   7   0    9.70    0.70
  -3   7   0   10.40    0.90
  -3   7   0    8.60    1.70
  -3   7   0    4.10    1.20
  -3   7   0    9.70    0.90
   2  -7   0   60.99    2.30
   2  -7   0   60.29    3.40
   2  -7   0   62.19    3.10
  -2   7   0   61.29    3.50
  -2   7   0   59.69    2.40
  -2   7   0   61.89    3.60
   1  -7   0  188.58    7.60
  -1   7   0  188.98    8.10
  -1   7   0  187.68    8.00
   0   7   0   11.00    1.60
   0   7   0    8.90    1.60
   0   7   0   11.30    1.60
   0   7   0    6.00    1.30
  -1  -7   0    2.60    0.50
   1   7   0    2.70    1.40
   1   7   0    3.10    0.50
   1   7   0    1.10    1.10
   1   7   0    1.40    1.20
   1   7   0    2.10    1.20
   1   7   0    3.30    0.60
  -2  -7   0   13.30    1.00
   2   7   0   14.90    1.80
   2   7   0   12.70    0.90
   2   7   0   12.60    1.00
   2   7   0   12.70    1.00
   2   7   0   15.10    1.60
   2   7   0   13.80    1.60
   2   7   0   12.90    0.90
  -3  -7   0   38.90    2.00
   3   7   0   41.00    2.00
   3   7   0   33.50    1.90
   3   7   0   37.80    1.90
   3   7   0   39.60    2.50
   3   7   0   44.40    2.10
   4   7   0    0.80    1.20
   4   7   0    0.00    0.80
   4   7   0    1.00    0.90
   4   7   0    0.90    1.40
   4   7   0    2.30    1.40
   4   7   0    0.10    1.10
   4   7   0    0.00    0.20
   4   7   0   -0.20    1.00
  -5  -7   0   23.20    1.60
   5   7   0   22.90    1.80
   5   7   0   26.90    2.30
   5   7   0   21.10    1.90
   5   7   0   24.10    2.40
   5   7   0   19.20    2.10
   5   7   0   24.90    1.90
   5   7   0   23.30    1.90
   5   7   0   16.60    1.90
  -6  -7   0    0.10    0.90
   6   7   0   -1.40    1.30
   6   7   0    0.90    1.30
   6   7   0   -0.90    1.20
   6   7   0   -1.10    1.10
   6   7   0   -0.10    1.20
   6   7   0    2.00    1.60
  -7  -7   0   62.29    3.40
  -7  -7   0   64.89    3.20
   7   7   0   59.59    3.50
   7   7   0   69.29    3.90
   7   7   0   70.79    3.90
   7   7   0   68.39    3.70
   7   7   0   66.69    3.70
   7   7   0   70.39    4.30
  -8  -7   0    2.50    1.20
  -8  -7   0   -2.80    1.40
  -8  -7   0   -0.60    1.00
   8   7   0    1.40    1.70
   8   7   0    0.20    0.60
   8   7   0    0.40    1.50
   8   7   0    0.70    1.80
   8   7   0    1.70    1.60
   8   7   0    0.60    1.60
   8   7   0    0.70    1.40
  -9  -7   0   60.19    3.30
  -9  -7   0   53.89    3.50
  -9  -7   0   59.99    3.60
   9   7   0   57.69    4.00
   9   7   0   57.99    3.80
   9   7   0   59.69    3.60
   9   7   0   51.29    4.20
   9   7   0   59.39    3.70
   9   7   0   56.49    3.10
   9   7   0   55.39    3.80
   9   7   0   64.69    3.40
 -10  -7   0   39.40    3.10
 -10  -7   0   42.80    2.90
 -10  -7   0   42.20    3.10
  10   7   0   36.30    2.70
  10   7   0   44.10    3.90
  10   7   0   41.80    3.10
  10   7   0   44.20    3.70
  10   7   0   38.10    3.30
  10   7   0   41.50    3.20
  10   7   0   38.80    3.40
 -11  -7   0   -1.70    1.50
  11   7   0   -0.80    1.50
  11   7   0   -1.10    2.00
  11   7   0   -2.40    1.90
  11   7   0    2.60    2.30
  11   7   0   -0.20    1.70
  11   7   0   -0.90    2.50
  11   7   0    1.00    1.60
 -12  -7   0    3.30    1.90
  12   7   0    4.40    2.40
  12   7   0    0.80    1.80
  12   7   0    6.00    2.50
  12   7   0    2.10    1.90
  12   7   0    4.10    2.80
  12   7   0    0.30    1.60
  12   7   0    2.40    2.20
 -13  -7   0    2.50    1.80
  13   7   0    3.10    1.90
  13   7   0   -2.60    2.30
  13   7   0    3.30    2.40
  13   7   0   -1.10    1.80
  13   7   0    0.20    1.80
  13   7   0    1.40    2.60
  13   7   0    2.70    2.90
  14   7   0    4.70    3.30
  14   7   0    1.10    2.20
  14   7   0   -6.40    3.50
  15   7   0    6.60    2.40
  15   7   0    4.80    3.20
  15   7   0    6.00    3.40
  16   7   0   18.60    4.40
  16   7   0    5.70    3.80
  16   7   0    8.80    2.80
  17   7   0    5.60    4.00
  17   7   0    9.00    3.10
  17   7   0    1.70    3.80
  18   7   0   13.30    5.60
  18   7   0    5.10    4.90
  13  -8   0    0.70    2.50
  13  -8   0   -0.40    2.10
 -13   8   0    0.80    2.20
 -13   8   0   -0.10    2.10
  12  -8   0    2.00    1.90
  12  -8   0    0.30    2.30
 -12   8   0    4.10    2.00
 -12   8   0    0.40    1.90
  11  -8   0    0.60    2.10
  11  -8   0    0.40    1.70
 -11   8   0    0.80    1.80
 -11   8   0    1.60    1.70
  10  -8   0   -1.40    1.50
  10  -8   0    0.20    1.80
 -10   8   0   -0.10    1.50
 -10   8   0   -2.30    1.20
   9  -8   0   -0.20    2.00
   9  -8   0    0.10    1.30
  -9   8   0   -1.30    1.00
  -9   8   0    2.30    1.40
   8  -8   0   15.80    2.60
   8  -8   0   16.30    1.80
  -8   8   0   16.60    1.90
  -8   8   0   17.20    1.80
  -8   8   0   18.30    2.80
   7  -8   0  148.09    6.10
   7  -8   0  146.79    7.60
  -7   8   0  144.69    5.90
  -7   8   0  147.49    6.00
  -7   8   0  145.99    7.50
   6  -8   0    2.50    1.10
   6  -8   0    6.60    1.40
   6  -8   0    3.10    1.90
   6  -8   0    4.80    1.30
  -6   8   0    2.00    1.00
  -6   8   0    3.90    1.10
  -6   8   0    3.40    1.00
  -6   8   0    0.90    1.70
  -6   8   0    5.50    1.20
   5  -8   0    1.30    0.90
   5  -8   0   -0.70    1.10
   5  -8   0   -0.50    1.20
   5  -8   0   -1.00    1.20
  -5   8   0    0.40    0.80
  -5   8   0    0.90    1.50
  -5   8   0    0.70    1.00
  -5   8   0    0.40    0.90
  -5   8   0   -0.20    0.70
  -5   8   0    1.40    0.90
   4  -8   0    4.70    1.40
   4  -8   0    2.40    0.80
   4  -8   0    2.90    1.40
  -4   8   0    2.80    1.30
  -4   8   0   -0.50    0.60
  -4   8   0    0.60    1.10
  -4   8   0    3.40    1.50
  -4   8   0    3.20    0.80
  -4   8   0    3.90    0.90
  -4   8   0    1.30    0.70
  -4   8   0    4.00    1.60
   3  -8   0    8.00    1.70
   3  -8   0    8.60    0.80
   3  -8   0    9.80    1.50
  -3   8   0    7.40    1.50
  -3   8   0    9.00    0.90
  -3   8   0    4.90    1.70
  -3   8   0   10.30    1.60
  -3   8   0    6.00    0.80
  -3   8   0    6.10    1.70
   2  -8   0   11.60    1.60
   2  -8   0   11.80    0.80
   2  -8   0   12.70    1.80
  -2   8   0   13.50    2.00
  -2   8   0   10.20    1.80
  -2   8   0   13.60    1.70
  -2   8   0   12.40    1.70
  -2   8   0   13.30    0.90
   1  -8   0  695.33   25.40
  -1   8   0  683.63   24.60
  -1   8   0  686.33   25.40
  -1   8   0  696.53   26.60
  -1   8   0  683.23   27.10
   0  -8   0  137.09    6.00
   0   8   0  130.09    6.30
   0   8   0  136.49    6.30
   0   8   0  140.69    6.00
   0   8   0  143.29    5.90
  -1  -8   0   45.40    1.80
   1   8   0   49.90    3.10
   1   8   0   44.40    2.90
   1   8   0   44.50    3.00
   1   8   0   45.20    2.90
   1   8   0   39.60    1.80
  -2  -8   0  190.98    6.70
   2   8   0  191.88    6.70
   2   8   0  181.38    7.50
   2   8   0  177.48    6.40
   2   8   0  183.28    8.00
   2   8   0  184.88    7.80
   2   8   0  174.18    6.70
   2   8   0  197.68    6.40
  -3  -8   0   75.59    3.20
   3   8   0   73.69    3.80
   3   8   0   74.89    3.30
   3   8   0   80.89    3.30
   3   8   0   75.99    4.10
   3   8   0   83.79    3.20
   3   8   0   77.69    4.20
   3   8   0   73.99    3.10
  -4  -8   0   87.89    3.70
   4   8   0   88.09    3.70
   4   8   0   88.19    4.30
   4   8   0   94.09    3.80
   4   8   0   85.19    4.60
   4   8   0   83.99    4.40
   4   8   0   86.89    3.60
   5   8   0  221.28    8.90
   5   8   0  231.98    8.40
   5   8   0  220.18    9.50
   5   8   0  211.48    9.10
   5   8   0  217.38    8.50
   5   8   0  235.48    8.30
   5   8   0  217.48    8.20
  -6  -8   0   68.99    3.30
   6   8   0   59.99    3.30
   6   8   0   69.39    3.80
   6   8   0   74.89    4.10
   6   8   0   66.29    3.50
   6   8   0   49.60    3.50
   6   8   0   67.29    3.20
   6   8   0   68.49    4.00
  -7  -8   0   43.60    3.10
   7   8   0   48.20    3.20
   7   8   0   43.30    3.00
   7   8   0   45.00    3.00
   7   8   0   48.10    3.40
   7   8   0   41.50    3.50
   7   8   0   47.50    3.20
  -8  -8   0   30.40    2.20
  -8  -8   0   27.30    2.30
  -8  -8   0   30.80    2.90
   8   8   0   31.20    2.80
   8   8   0   27.40    2.90
   8   8   0   26.70    2.70
   8   8   0   29.10    2.70
   8   8   0   26.70    2.50
   8   8   0   26.40    3.00
  -9  -8   0    4.00    1.80
   9   8   0    5.50    2.30
   9   8   0    4.40    1.90
   9   8   0    6.70    1.80
   9   8   0    3.30    1.90
   9   8   0    4.70    1.90
   9   8   0    4.90    1.90
 -10  -8   0   21.10    2.60
  10   8   0   28.40    2.70
  10   8   0   21.60    2.80
  10   8   0   20.80    3.00
  10   8   0   13.50    1.30
  10   8   0   19.30    2.80
  10   8   0   25.00    2.70
  10   8   0   22.80    2.70
 -11  -8   0   47.40    3.70
  11   8   0   48.50    3.90
  11   8   0   49.50    4.20
  11   8   0   55.59    3.60
  11   8   0   75.09    5.20
  11   8   0   52.29    3.80
  11   8   0   61.59    4.40
  11   8   0   64.99    5.20
 -12  -8   0   10.30    2.20
  12   8   0   11.80    2.00
  12   8   0   10.60    2.40
  12   8   0   11.00    3.40
  12   8   0   14.80    2.80
  12   8   0   13.90    3.20
  12   8   0   13.50    2.40
  12   8   0   13.50    2.80
 -13  -8   0    1.30    2.00
  13   8   0    2.10    2.30
  13   8   0   -0.60    2.00
  13   8   0   -5.00    2.30
  13   8   0    3.10    3.30
  13   8   0    0.60    2.00
  13   8   0    8.10    3.90
 -14  -8   0   14.70    2.50
  14   8   0   17.00    3.50
  14   8   0   21.80    2.90
  14   8   0   10.70    2.90
  14   8   0   13.10    3.40
  14   8   0   16.20    2.70
  14   8   0   26.30    4.40
  15   8   0    1.10    2.20
  15   8   0    2.50    3.30
  15   8   0   -0.90    3.20
  16   8   0    6.40    2.80
  16   8   0    0.70    3.60
  16   8   0   11.30    4.40
  17   8   0    3.00    3.50
  17   8   0    7.40    3.00
  17   8   0    8.20    4.50
  13  -9   0    0.40    2.20
  13  -9   0    0.40    2.60
 -13   9   0    0.20    2.10
 -13   9   0   -0.60    2.30
  12  -9   0   -2.30    1.90
  12  -9   0    5.40    2.70
 -12   9   0    2.00    2.00
 -12   9   0    1.80    2.10
  11  -9   0   11.50    2.20
  11  -9   0   15.80    3.30
 -11   9   0   14.50    2.20
 -11   9   0   15.30    2.40
  10  -9   0    1.30    2.00
  10  -9   0   -0.40    1.40
 -10   9   0    1.30    1.50
 -10   9   0   -0.90    1.30
   9  -9   0   15.30    2.00
   9  -9   0   15.80    3.10
  -9   9   0   11.70    2.70
  -9   9   0   16.30    2.00
  -9   9   0   18.10    2.00
   8  -9   0   31.80    3.60
   8  -9   0   37.80    2.70
  -8   9   0   34.00    3.90
  -8   9   0   38.50    2.70
  -8   9   0   38.10    2.70
   7  -9   0   35.90    3.60
   7  -9   0   38.80    2.80
  -7   9   0   39.40    3.80
  -7   9   0   41.10    2.60
  -7   9   0   35.30    2.60
   6  -9   0    6.40    1.30
   6  -9   0    5.70    2.10
   6  -9   0    5.10    1.50
  -6   9   0    4.60    1.20
  -6   9   0    4.20    2.00
  -6   9   0    6.20    1.30
   5  -9   0    6.10    1.60
   5  -9   0    5.60    2.00
   5  -9   0    4.10    1.10
   5  -9   0    2.90    1.40
  -5   9   0    6.20    1.10
  -5   9   0    5.50    1.10
  -5   9   0    6.00    1.40
  -5   9   0    4.60    2.00
  -5   9   0    5.20    1.00
  -5   9   0    6.20    1.10
   4  -9   0   -0.80    0.70
   4  -9   0    0.50    1.30
   4  -9   0   -0.30    1.20
  -4   9   0    1.00    1.50
  -4   9   0   -0.10    1.60
  -4   9   0    1.40    1.40
  -4   9   0   -0.60    0.70
  -4   9   0   -0.50    0.70
  -4   9   0   -0.30    0.80
  -4   9   0    0.20    0.80
  -4   9   0    0.70    1.30
   3  -9   0   13.90    2.10
   3  -9   0   14.80    1.90
   3  -9   0   12.40    1.00
  -3   9   0   13.70    2.00
  -3   9   0   17.50    2.00
  -3   9   0   12.10    2.20
  -3   9   0   15.40    1.20
  -3   9   0   15.30    2.20
  -3   9   0   14.00    1.10
   2  -9   0    1.80    1.30
   2  -9   0    2.70    0.50
   2  -9   0    3.10    1.50
  -2   9   0    3.10    0.60
  -2   9   0   -0.10    1.50
  -2   9   0    2.70    1.60
  -2   9   0    1.90    1.40
  -2   9   0    2.80    0.60
  -2   9   0    1.40    1.50
   1  -9   0   16.80    1.90
  -1   9   0   14.20    1.90
  -1   9   0   13.20    2.00
  -1   9   0   15.00    2.10
  -1   9   0   12.90    1.90
   0  -9   0   11.30    1.70
   0   9   0   12.40    2.00
   0   9   0   15.90    2.00
   0   9   0   12.80    1.80
   0   9   0   16.10    2.00
  -1  -9   0    4.60    0.60
  -1  -9   0    3.60    1.70
   1   9   0    4.30    0.70
   1   9   0    5.10    1.70
   1   9   0    4.40    1.40
   1   9   0    5.30    1.70
   1   9   0    4.40    1.40
   1   9   0    5.40    0.60
  -2  -9   0    6.30    0.80
  -2  -9   0    5.20    1.80
   2   9   0    5.10    0.60
   2   9   0    6.20    1.50
   2   9   0    6.40    0.80
   2   9   0    6.00    0.80
   2   9   0    6.60    1.80
   2   9   0    3.90    1.50
   2   9   0    4.60    1.60
  -3  -9   0   88.79    3.60
   3   9   0   85.79    3.40
   3   9   0   81.29    4.40
   3   9   0   92.79    3.50
   3   9   0   87.09    4.70
   3   9   0   87.79    4.50
   3   9   0   83.69    4.50
   3   9   0   85.19    3.60
   3   9   0   92.09    3.60
  -4  -9   0   78.99    3.40
   4   9   0   70.09    4.40
   4   9   0   80.99    3.30
   4   9   0   64.39    4.00
   4   9   0   84.89    3.50
   4   9   0   78.39    3.30
  -5  -9   0    1.30    1.00
   5   9   0   -0.90    1.00
   5   9   0   -0.20    0.30
   5   9   0    2.30    1.10
   5   9   0    0.10    1.30
   5   9   0   -0.50    0.90
   5   9   0    1.00    1.40
   5   9   0    1.00    1.60
   5   9   0   -1.00    1.40
  -6  -9   0   28.70    1.90
  -6  -9   0   28.40    2.70
   6   9   0   28.30    2.80
   6   9   0   26.70    2.40
   6   9   0   29.40    2.30
   6   9   0   30.50    2.80
   6   9   0   25.00    2.00
   6   9   0   28.60    2.30
   6   9   0   25.30    2.30
   6   9   0   24.70    2.50
  -7  -9   0   78.49    4.60
  -7  -9   0   83.69    4.00
   7   9   0   74.19    4.70
   7   9   0   80.19    4.40
   7   9   0   75.19    4.40
   7   9   0   75.49    4.00
   7   9   0   80.09    4.50
   7   9   0   73.49    4.20
  -8  -9   0   32.70    3.00
   8   9   0   25.90    2.50
   8   9   0   25.70    3.00
   8   9   0   25.30    2.70
   8   9   0   28.80    2.70
   8   9   0   30.50    3.00
   8   9   0   25.90    2.70
  -9  -9   0   19.30    2.60
   9   9   0   13.80    2.30
   9   9   0   20.30    2.60
   9   9   0   17.80    2.50
   9   9   0   18.90    2.50
   9   9   0   17.30    2.80
   9   9   0   18.30    2.60
 -10  -9   0   36.30    3.10
  10   9   0   37.00    3.40
  10   9   0   39.60    3.30
  10   9   0   30.80    3.60
  10   9   0   33.20    3.30
  10   9   0   39.40    3.40
  10   9   0   31.70    3.30
 -11  -9   0   14.30    2.50
  11   9   0   14.80    3.00
  11   9   0   15.20    3.10
  11   9   0   16.00    2.80
  11   9   0   18.20    2.70
  11   9   0   16.50    2.60
  11   9   0   19.00    2.60
 -12  -9   0    4.70    2.10
  12   9   0    6.80    2.40
  12   9   0    5.90    2.10
  12   9   0    2.30    2.90
  12   9   0    6.50    2.80
  12   9   0    3.10    2.00
  12   9   0    3.30    2.50
 -13  -9   0   -0.40    2.10
  13   9   0    8.00    3.60
  13   9   0    0.60    2.20
  13   9   0    3.70    2.60
  13   9   0   -0.10    2.40
  13   9   0    2.50    2.10
 -14  -9   0    0.40    2.00
  14   9   0    2.60    2.20
  14   9   0    0.10    1.90
  14   9   0   -0.60    2.30
  14   9   0   -0.50    2.70
  14   9   0    8.20    3.50
  14   9   0    2.70    3.20
  15   9   0    0.00    3.30
  15   9   0   10.80    3.90
  16   9   0    7.90    4.40
  16   9   0    1.90    3.80
  17   9   0    0.00    3.90
  12 -10   0    2.90    2.00
  12 -10   0    3.50    3.00
 -12  10   0    3.00    2.00
 -12  10   0    5.90    2.30
  11 -10   0    2.30    2.80
  11 -10   0    1.60    1.70
 -11  10   0    1.70    1.70
 -11  10   0   -0.30    1.50
  10 -10   0   33.20    4.30
  10 -10   0   29.60    2.70
 -10  10   0   30.80    2.70
 -10  10   0   30.90    2.80
   9 -10   0    0.30    2.00
   9 -10   0    2.30    1.40
  -9  10   0    2.80    1.40
  -9  10   0    4.70    2.60
  -9  10   0    1.90    1.40
   8 -10   0   -0.70    1.30
   8 -10   0   -1.10    2.20
  -8  10   0    1.20    1.30
  -8  10   0   -0.90    1.20
  -8  10   0    0.20    2.20
   7 -10   0   18.60    1.90
   7 -10   0   16.80    3.00
  -7  10   0   14.70    1.80
  -7  10   0   15.50    1.70
  -7  10   0   16.10    2.90
   6 -10   0    1.20    1.20
   6 -10   0    2.40    2.00
  -6  10   0    3.30    2.10
  -6  10   0    2.60    1.20
  -6  10   0    3.30    1.20
   5 -10   0    1.70    1.50
   5 -10   0    3.70    1.10
   5 -10   0    0.10    1.80
   5 -10   0    3.20    1.60
  -5  10   0    0.70    1.90
  -5  10   0    2.30    1.00
  -5  10   0    2.40    1.00
  -5  10   0    1.80    1.00
  -5  10   0    2.10    1.40
  -5  10   0    0.90    0.90
   4 -10   0   73.09    4.70
   4 -10   0   83.09    3.50
   4 -10   0   80.19    4.30
  -4  10   0   82.39    3.50
  -4  10   0   83.19    4.40
  -4  10   0   86.09    5.10
  -4  10   0   87.29    3.50
  -4  10   0   75.89    4.90
  -4  10   0   83.89    3.30
  -4  10   0   82.29    4.40
  -4  10   0   87.09    3.40
   3 -10   0   79.19    3.20
   3 -10   0   82.29    4.30
   3 -10   0   74.49    4.70
  -3  10   0   81.89    4.40
  -3  10   0   82.59    4.30
  -3  10   0   81.29    3.20
  -3  10   0   78.19    3.20
  -3  10   0   82.69    4.80
  -3  10   0   73.99    4.70
   2 -10   0   58.69    3.90
   2 -10   0   55.79    3.50
   2 -10   0   58.29    2.30
  -2  10   0   54.99    3.50
  -2  10   0   62.09    4.00
  -2  10   0   61.39    2.40
  -2  10   0   65.79    4.10
  -2  10   0   58.29    2.30
  -2  10   0   59.79    3.70
   1 -10   0    2.50    1.50
  -1  10   0    2.50    1.60
  -1  10   0    1.30    1.50
  -1  10   0    2.30    1.70
  -1  10   0    3.20    1.50
   0 -10   0   -0.20    1.40
   0  10   0    0.10    1.50
   0  10   0    0.50    1.60
   0  10   0   -0.60    1.20
   0  10   0   -1.10    1.30
  -1 -10   0   22.00    1.20
  -1 -10   0   19.20    2.40
   1  10   0   20.80    2.40
   1  10   0   25.70    2.60
   1  10   0   21.40    1.20
   1  10   0   22.90    2.30
   1  10   0   23.00    1.30
   1  10   0   23.20    2.40
  -2 -10   0   45.70    2.00
  -2 -10   0   46.70    3.40
   2  10   0   48.60    3.40
   2  10   0   39.40    1.70
   2  10   0   42.70    3.00
   2  10   0   42.00    3.20
   2  10   0   43.30    3.30
   2  10   0   42.30    2.10
  -3 -10   0   81.39    3.30
  -3 -10   0   85.99    4.50
   3  10   0   81.59    4.40
   3  10   0   78.19    3.20
   3  10   0   83.09    4.60
   3  10   0   75.59    3.40
   3  10   0   74.39    4.30
   3  10   0   82.49    3.40
   3  10   0   85.19    3.30
   3  10   0   73.89    4.30
  -4 -10   0    6.80    1.10
  -4 -10   0    7.60    1.80
   4  10   0    7.90    1.90
   4  10   0    8.90    1.80
   4  10   0    9.20    1.70
   4  10   0    9.30    1.60
   4  10   0    8.50    1.20
   4  10   0    9.50    1.20
   4  10   0    7.80    1.20
   4  10   0    8.40    1.20
  -5 -10   0   -0.10    0.40
  -5 -10   0    1.70    1.00
   5  10   0    3.00    1.10
   5  10   0    3.50    1.40
   5  10   0    1.90    1.50
   5  10   0    3.20    1.10
   5  10   0    1.80    1.20
   5  10   0    1.40    0.90
   5  10   0    1.10    0.80
   5  10   0    2.70    1.80
  -6 -10   0    1.90    0.70
  -6 -10   0    0.30    1.00
  -6 -10   0   -0.40    1.40
   6  10   0   -0.90    1.40
   6  10   0    0.40    0.90
   6  10   0    0.40    1.10
   6  10   0   -0.40    1.80
   6  10   0    0.00    1.10
   6  10   0    0.30    1.30
   6  10   0   -2.10    1.70
   6  10   0    1.00    1.70
  -7 -10   0   27.10    2.80
  -7 -10   0   26.80    2.20
   7  10   0   25.60    2.40
   7  10   0   30.00    3.10
   7  10   0   31.00    3.00
   7  10   0   30.00    2.80
   7  10   0   24.00    2.40
   7  10   0   23.40    2.80
  -8 -10   0    0.50    1.60
   8  10   0    0.20    1.70
   8  10   0   -1.20    1.90
   8  10   0    1.10    1.90
   8  10   0   -0.50    1.50
   8  10   0    1.30    1.70
   8  10   0    0.40    2.00
  -9 -10   0    1.10    2.00
   9  10   0    0.80    1.80
   9  10   0   -1.50    1.60
   9  10   0    0.60    1.70
   9  10   0    0.80    1.70
   9  10   0    0.60    1.60
   9  10   0    1.70    1.90
 -10 -10   0   25.70    3.10
  10  10   0   20.10    3.20
  10  10   0   24.30    2.90
  10  10   0   19.90    2.80
  10  10   0   25.50    3.00
  10  10   0   24.10    3.00
  10  10   0   29.50    3.10
 -11 -10   0    8.60    2.30
  11  10   0    8.40    2.60
  11  10   0    4.70    2.30
  11  10   0    6.20    2.30
  11  10   0   10.20    2.40
  11  10   0    6.00    2.20
  11  10   0    5.50    2.80
 -12 -10   0    4.30    2.20
  12  10   0    6.30    2.70
  12  10   0    5.10    2.50
  12  10   0    7.80    2.50
  12  10   0    3.20    2.10
  12  10   0    5.70    2.30
  12  10   0    0.30    2.80
 -13 -10   0    4.30    2.50
  13  10   0    2.80    2.60
  13  10   0    1.30    2.60
  13  10   0    3.30    2.30
  13  10   0    4.70    2.80
  13  10   0    7.60    3.10
  13  10   0    3.00    2.40
 -14 -10   0   18.10    3.10
  14  10   0   18.40    3.80
  14  10   0   17.50    3.40
  14  10   0   14.30    3.70
  14  10   0   22.30    3.20
  14  10   0   18.20    3.60
  14  10   0   19.80    3.00
 -15 -10   0    2.60    2.30
  15  10   0    6.60    3.70
  15  10   0    7.50    2.70
  15  10   0    8.70    3.70
  16  10   0   -2.30    3.50
  17  10   0   -2.60    3.80
  11 -11   0    0.90    1.70
  11 -11   0   -3.60    2.50
 -11  11   0    0.30    1.70
 -11  11   0    0.60    1.80
  10 -11   0    8.00    3.00
  10 -11   0    4.90    1.70
 -10  11   0    8.80    1.90
 -10  11   0    5.80    1.80
   9 -11   0    0.40    2.20
   9 -11   0   -1.20    1.40
  -9  11   0    3.10    1.50
  -9  11   0    2.90    2.20
  -9  11   0    0.10    1.40
   8 -11   0   27.00    2.40
   8 -11   0   24.60    3.60
  -8  11   0   26.10    2.30
  -8  11   0   31.60    3.90
  -8  11   0   25.30    2.30
   7 -11   0   -0.70    2.20
   7 -11   0    1.90    1.30
  -7  11   0    1.30    1.30
  -7  11   0    2.10    1.30
  -7  11   0    1.50    2.10
   6 -11   0   47.70    4.30
   6 -11   0   45.10    2.70
  -6  11   0   41.40    2.70
  -6  11   0   41.40    4.10
  -6  11   0   42.30    2.60
   5 -11   0   -1.30    1.00
   5 -11   0   -3.40    1.70
   5 -11   0    0.30    1.60
  -5  11   0   -0.40    0.90
  -5  11   0   -1.70    0.90
  -5  11   0    2.60    1.90
  -5  11   0    1.20    1.10
  -5  11   0    0.50    1.70
  -5  11   0    0.40    1.40
   4 -11   0   -1.30    1.70
   4 -11   0    0.70    1.60
   4 -11   0    1.10    0.80
  -4  11   0    1.40    0.80
  -4  11   0    2.40    1.60
  -4  11   0   -1.00    1.50
  -4  11   0   -1.40    1.50
  -4  11   0    0.90    0.90
  -4  11   0   -0.10    2.00
  -4  11   0   -0.10    0.80
  -4  11   0    0.10    0.80
   3 -11   0    1.40    0.70
   3 -11   0    0.50    1.60
   3 -11   0    1.70    1.70
  -3  11   0    6.50    1.90
  -3  11   0    2.90    0.80
  -3  11   0    3.90    2.00
  -3  11   0    4.20    1.90
  -3  11   0    1.90    0.80
  -3  11   0    2.80    1.80
   2 -11   0   -0.20    0.50
   2 -11   0    4.50    1.70
   2 -11   0    0.90    1.60
  -2  11   0    0.80    1.60
  -2  11   0    2.10    1.90
  -2  11   0    1.10    1.60
  -2  11   0   -1.60    0.60
  -2  11   0   -0.10    1.50
   1 -11   0    3.00    1.60
  -1  11   0    3.90    2.00
  -1  11   0    4.70    1.80
  -1  11   0    5.10    1.80
  -1  11   0    8.50    1.90
   0 -11   0   -1.60    1.50
   0  11   0    0.90    1.60
   0  11   0    1.80    1.60
   0  11   0    0.10    1.50
   0  11   0    1.00    1.70
  -1 -11   0    0.10    0.50
  -1 -11   0    0.30    1.40
   1  11   0    2.10    0.60
   1  11   0   -1.10    1.50
   1  11   0   -0.40    1.40
   1  11   0   -1.40    1.60
   1  11   0   -0.60    0.60
   1  11   0    0.40    1.60
  -2 -11   0   44.50    2.00
  -2 -11   0   43.70    3.50
   2  11   0   35.10    3.10
   2  11   0   42.10    1.70
   2  11   0   43.10    2.10
   2  11   0   44.50    2.10
   2  11   0   39.50    3.30
   2  11   0   43.30    3.20
   2  11   0   45.50    3.50
  -3 -11   0    1.20    0.80
  -3 -11   0    0.00    1.50
   3  11   0   -0.80    1.60
   3  11   0    0.00    0.80
   3  11   0    0.20    1.40
   3  11   0    1.50    1.40
   3  11   0    0.50    0.60
   3  11   0    0.60    1.50
   3  11   0    0.90    0.90
   3  11   0   -1.30    0.60
  -4 -11   0    0.30    1.60
  -4 -11   0   -0.30    0.90
   4  11   0    0.40    0.90
   4  11   0   -2.70    1.20
   4  11   0    0.10    0.80
   4  11   0   -0.90    1.30
   4  11   0   -0.70    0.90
   4  11   0    3.00    1.80
   4  11   0   -0.40    0.90
   4  11   0   -0.30    1.30
  -5 -11   0    1.70    1.20
  -5 -11   0    1.00    1.00
   5  11   0    0.00    0.50
   5  11   0    0.20    0.80
   5  11   0   -1.20    0.90
   5  11   0    1.70    1.10
   5  11   0    2.40    1.10
   5  11   0    0.40    1.50
   5  11   0    0.50    0.80
   5  11   0    0.40    1.80
  -6 -11   0    0.00    1.00
   6  11   0    3.30    2.10
   6  11   0    2.60    1.20
   6  11   0    0.80    1.10
   6  11   0    3.40    1.20
   6  11   0    2.00    1.80
   6  11   0   -0.10    1.30
   6  11   0    3.00    1.70
   6  11   0   -0.20    0.60
  -7 -11   0    1.20    1.00
  -7 -11   0    1.60    1.70
   7  11   0    2.00    1.70
   7  11   0   -0.20    1.30
   7  11   0    1.40    1.70
   7  11   0   -2.50    1.90
   7  11   0    1.80    1.50
   7  11   0   -0.40    1.90
  -8 -11   0   26.70    2.30
  -8 -11   0   24.40    3.10
   8  11   0   28.10    3.20
   8  11   0   23.00    3.10
   8  11   0   22.80    2.50
   8  11   0   29.10    3.10
   8  11   0   30.00    2.90
   8  11   0   22.30    2.60
  -9 -11   0   31.60    3.40
   9  11   0   30.20    3.40
   9  11   0   23.30    2.70
   9  11   0   26.80    3.00
   9  11   0   27.10    2.90
   9  11   0   24.70    3.30
   9  11   0   26.50    2.90
 -10 -11   0   26.20    3.20
  10  11   0   20.80    2.90
  10  11   0   22.50    3.00
  10  11   0   20.10    2.90
  10  11   0   19.30    2.80
  10  11   0   13.40    3.00
  10  11   0   21.50    2.80
 -11 -11   0   -4.90    2.10
  11  11   0   -0.50    2.10
  11  11   0   -3.70    2.40
  11  11   0    0.70    1.90
  11  11   0   -1.30    2.10
  11  11   0   -1.80    2.20
  11  11   0   -0.20    2.10
 -12 -11   0   -0.70    2.30
  12  11   0   -0.90    2.20
  12  11   0    2.40    2.30
  12  11   0   -1.30    2.30
  12  11   0    0.10    2.20
  12  11   0   -1.10    2.30
  12  11   0   -1.50    2.60
 -13 -11   0    0.40    2.30
  13  11   0    4.50    2.60
  13  11   0   -4.10    2.40
  13  11   0    0.00    2.30
  13  11   0    0.50    2.90
  13  11   0   -1.70    2.00
  13  11   0    1.20    2.60
 -14 -11   0    2.60    2.70
  14  11   0   -0.30    2.80
  14  11   0    1.00    2.20
  14  11   0    0.40    3.10
  14  11   0    1.20    2.30
  14  11   0   -3.40    2.40
  14  11   0    1.20    2.70
 -15 -11   0   -1.70    2.40
  15  11   0    3.20    3.00
  15  11   0    5.80    2.80
  15  11   0   -2.30    2.90
  15  11   0    0.00    3.20
  15  11   0   -1.00    2.30
  16  11   0   -5.10    3.30
  17  11   0    7.30    4.40
  10 -12   0    4.00    1.80
  10 -12   0    9.40    3.30
 -10  12   0    5.60    2.00
 -10  12   0    9.30    2.10
   9 -12   0    4.30    2.40
   9 -12   0    1.20    1.70
  -9  12   0    1.70    2.60
  -9  12   0    0.80    1.60
  -9  12   0    1.70    1.60
   8 -12   0    7.60    1.70
   8 -12   0    2.80    2.50
  -8  12   0    4.40    1.60
  -8  12   0    6.50    1.60
  -8  12   0    5.80    2.80
   7 -12   0   12.20    1.70
   7 -12   0    8.70    2.80
  -7  12   0    8.60    2.50
  -7  12   0    8.60    1.60
  -7  12   0   11.80    1.70
   6 -12   0   -1.70    2.10
   6 -12   0    1.60    1.20
  -6  12   0   -1.10    1.60
  -6  12   0    1.50    1.20
  -6  12   0    0.50    1.10
   5 -12   0    6.60    2.30
   5 -12   0    7.70    1.20
  -5  12   0    8.40    2.70
  -5  12   0    9.30    2.60
  -5  12   0    6.00    1.20
  -5  12   0    9.20    1.30
   4 -12   0   44.90    2.40
   4 -12   0   42.30    3.90
   4 -12   0   44.50    3.60
  -4  12   0   41.90    3.80
  -4  12   0   49.20    2.40
  -4  12   0   44.60    3.60
  -4  12   0   44.70    4.10
  -4  12   0   46.70    2.30
  -4  12   0   48.30    3.50
  -4  12   0   43.10    2.40
  -4  12   0   47.10    2.30
   3 -12   0   12.10    2.10
   3 -12   0    7.60    2.20
   3 -12   0    6.80    0.90
  -3  12   0   11.40    2.30
  -3  12   0    9.30    2.50
  -3  12   0    4.80    2.00
  -3  12   0    6.20    2.30
  -3  12   0    7.70    1.00
  -3  12   0    7.90    1.00
   2 -12   0   31.50    3.10
   2 -12   0   35.10    1.60
   2 -12   0   34.90    3.40
  -2  12   0   33.40    3.40
  -2  12   0   29.80    3.40
  -2  12   0   37.40    1.70
  -2  12   0   40.70    3.40
  -2  12   0   35.90    3.20
   1 -12   0   23.60    2.70
  -1  12   0   21.00    2.80
  -1  12   0   26.10    3.10
  -1  12   0   23.40    2.70
  -1  12   0   26.30    2.80
   0 -12   0    2.30    1.80
   0  12   0    3.20    1.70
   0  12   0    5.30    1.90
   0  12   0    2.60    1.90
   0  12   0    3.90    1.80
  -1 -12   0    1.80    0.60
  -1 -12   0    1.70    1.60
   1  12   0    1.30    1.60
   1  12   0    2.30    1.80
   1  12   0    3.30    0.70
   1  12   0    2.10    1.60
   1  12   0    3.40    0.70
   1  12   0    2.90    1.80
  -2 -12   0    4.90    2.10
  -2 -12   0    4.60    0.80
   2  12   0    7.60    2.10
   2  12   0    0.00    1.80
   2  12   0    4.50    0.90
   2  12   0    4.40    1.60
   2  12   0    3.80    0.60
   2  12   0    6.30    2.10
   2  12   0    3.70    0.90
   2  12   0    5.40    0.70
  -3 -12   0    2.20    0.90
  -3 -12   0    0.60    2.00
   3  12   0    1.40    1.00
   3  12   0    1.00    0.80
   3  12   0    2.00    1.60
   3  12   0    1.10    0.80
   3  12   0    1.50    1.50
   3  12   0    2.00    1.90
   3  12   0    2.30    2.10
   3  12   0    2.30    0.90
  -4 -12   0   -0.30    0.90
  -4 -12   0   -0.20    1.90
   4  12   0    1.90    2.00
   4  12   0    0.30    0.90
   4  12   0   -0.50    0.80
   4  12   0   -1.40    0.90
   4  12   0    0.40    1.70
   4  12   0    0.10    1.00
   4  12   0   -0.50    1.50
   4  12   0    1.20    1.60
  -5 -12   0   18.50    2.60
  -5 -12   0   19.90    1.80
   5  12   0   20.30    2.40
   5  12   0   21.00    1.80
   5  12   0   18.80    2.70
   5  12   0   21.70    1.80
   5  12   0   21.00    1.80
   6  12   0   89.29    4.90
   6  12   0   94.69    5.10
   6  12   0   84.49    4.20
  -7 -12   0  116.09    6.10
   7  12   0  114.99    5.30
   7  12   0  113.69    6.40
   7  12   0  115.99    5.50
   7  12   0  116.09    6.00
   7  12   0  116.29    6.00
   7  12   0  121.39    6.50
  -8 -12   0  112.29    6.40
  -8 -12   0  119.69    5.70
   8  12   0  113.89    6.60
   8  12   0  115.49    6.30
   8  12   0  121.99    6.40
   8  12   0  114.09    5.60
   8  12   0  120.19    6.20
   8  12   0  110.39    5.60
  -9 -12   0  204.38    9.20
   9  12   0  201.98    9.20
   9  12   0  205.68    8.40
   9  12   0  186.98    9.00
   9  12   0  200.28    9.30
   9  12   0  190.18    9.50
   9  12   0  188.28    8.40
 -10 -12   0    0.20    2.40
  10  12   0   -2.10    1.90
  10  12   0    1.80    2.10
  10  12   0   -3.00    2.40
  10  12   0   -2.10    2.20
  10  12   0    1.70    2.00
  10  12   0    0.10    2.00
 -11 -12   0   15.40    3.20
  11  12   0   13.10    2.80
  11  12   0   11.40    2.60
  11  12   0   10.90    2.60
  11  12   0   13.10    2.90
  11  12   0   17.10    3.10
  11  12   0   16.30    3.30
 -12 -12   0   -0.80    2.40
  12  12   0    3.50    2.60
  12  12   0    4.40    2.50
  12  12   0    3.40    2.50
  12  12   0   -2.00    2.10
  12  12   0    6.00    2.30
  12  12   0    5.30    2.80
 -13 -12   0    6.60    2.70
  13  12   0    8.90    3.20
  13  12   0    7.40    2.80
  13  12   0    4.80    2.60
  13  12   0    5.20    2.50
  13  12   0    3.90    2.80
 -14 -12   0    3.30    2.60
  14  12   0    3.70    3.20
  14  12   0    2.60    2.80
  14  12   0    7.50    3.00
  14  12   0    2.80    3.10
  14  12   0    4.80    2.50
 -15 -12   0    6.50    2.80
  15  12   0    3.00    2.80
  15  12   0   -3.00    3.20
  15  12   0    2.60    2.60
  15  12   0    5.80    3.40
  15  12   0    1.80    2.80
  16  12   0   -3.50    3.30
  17  12   0   -4.90    3.80
   9 -13   0    3.70    1.80
   9 -13   0    1.30    2.70
  -9  13   0   -0.60    1.80
  -9  13   0   -0.40    2.70
  -9  13   0    1.90    1.80
   8 -13   0    2.90    2.30
   8 -13   0    0.20    1.50
  -8  13   0   -1.60    1.40
  -8  13   0   -2.10    2.40
  -8  13   0    0.70    1.50
   7 -13   0    1.10    2.40
   7 -13   0   -0.10    1.30
  -7  13   0   -0.30    1.30
  -7  13   0    0.60    2.30
  -7  13   0    0.60    1.30
   6 -13   0    1.80    1.20
   6 -13   0   -1.50    2.10
  -6  13   0    2.20    1.30
  -6  13   0   -0.40    2.10
  -6  13   0    0.60    1.20
   5 -13   0   -0.70    2.10
   5 -13   0    1.80    1.10
  -5  13   0    0.30    1.00
  -5  13   0   -0.60    2.00
  -5  13   0   -0.10    1.00
   4 -13   0   -1.40    0.80
   4 -13   0   -0.80    1.60
   4 -13   0    1.60    1.90
  -4  13   0   -0.20    0.80
  -4  13   0    1.80    1.80
  -4  13   0   -0.10    0.90
  -4  13   0   -2.50    2.10
  -4  13   0   -0.40    0.90
  -4  13   0   -1.50    2.00
  -4  13   0   -2.30    1.70
   3 -13   0    2.20    1.80
   3 -13   0    0.60    1.90
   3 -13   0    1.80    0.70
  -3  13   0    2.00    2.00
  -3  13   0    4.10    2.40
  -3  13   0    0.60    0.80
  -3  13   0    0.90    2.10
  -3  13   0    0.30    2.10
  -3  13   0    2.20    0.80
   2 -13   0    3.90    2.00
   2 -13   0    6.20    2.10
   2 -13   0    3.40    0.60
  -2  13   0    3.30    2.00
  -2  13   0   -0.60    1.90
  -2  13   0    2.80    2.30
  -2  13   0    1.60    1.90
   1 -13   0   -0.40    1.60
   1 -13   0   -0.50    1.70
  -1  13   0    0.60    1.80
  -1  13   0    1.90    1.90
  -1  13   0   -0.90    1.80
  -1  13   0    0.70    2.20
   0 -13   0    6.80    2.20
   0  13   0    1.50    1.90
   0  13   0    4.30    2.00
   0  13   0    5.40    2.20
   0  13   0    4.50    2.10
  -1 -13   0   -0.40    1.90
  -1 -13   0    2.90    0.70
   1  13   0    0.90    1.90
   1  13   0   -0.60    2.00
   1  13   0    2.90    2.10
   1  13   0    2.60    0.80
   1  13   0    0.30    1.60
   1  13   0    1.20    0.70
  -2 -13   0    0.50    2.00
  -2 -13   0    0.40    0.80
   2  13   0    0.70    0.80
   2  13   0    1.40    1.90
   2  13   0   -0.10    1.90
   2  13   0    0.80    0.60
   2  13   0    0.30    0.70
   2  13   0    0.20    0.80
   2  13   0    3.20    2.00
   2  13   0   -1.00    1.50
  -3 -13   0   -0.40    0.80
  -3 -13   0    1.10    2.10
   3  13   0   -1.50    0.80
   3  13   0    0.90    1.70
   3  13   0   -2.50    1.50
   3  13   0   -0.40    0.90
   3  13   0    0.00    1.00
   3  13   0    0.40    1.90
   3  13   0    0.50    1.70
   3  13   0    1.00    1.00
  -4 -13   0    3.60    2.30
  -4 -13   0    0.00    1.00
   4  13   0    1.10    1.10
   4  13   0    1.60    1.10
   4  13   0   -0.10    1.00
   4  13   0    5.40    2.20
   4  13   0    1.90    2.00
   4  13   0    0.90    1.80
   4  13   0    0.80    1.60
   4  13   0   -0.40    0.80
  -5 -13   0   45.80    3.80
   5  13   0   40.90    2.80
   5  13   0   44.30    3.80
   5  13   0   45.40    2.70
   5  13   0   42.40    3.80
   5  13   0   39.20    3.50
   5  13   0   42.30    3.90
  -6 -13   0  261.07   11.40
   6  13   0  274.97   11.60
   6  13   0  253.37   11.70
   6  13   0  276.07   11.20
   6  13   0  269.77   10.00
   6  13   0  260.27   11.40
   6  13   0  258.47   10.10
  -7 -13   0   58.69    4.50
   7  13   0   56.89    4.10
   7  13   0   54.99    4.50
   7  13   0   56.39    3.40
   7  13   0   57.29    4.30
   7  13   0   52.49    4.50
   7  13   0   50.59    3.60
  -8 -13   0  115.89    6.60
   8  13   0  121.59    5.70
   8  13   0  114.69    6.50
   8  13   0  116.79    6.30
   8  13   0  111.99    5.70
   8  13   0  116.79    6.80
   8  13   0  115.59    6.50
  -9 -13   0   10.60    2.70
   9  13   0   14.10    2.50
   9  13   0    8.50    2.30
   9  13   0   10.20    2.40
   9  13   0   13.70    3.10
   9  13   0   12.80    3.10
   9  13   0   13.90    3.10
 -10 -13   0   24.30    3.30
  10  13   0   20.30    3.50
  10  13   0   23.10    3.00
  10  13   0   20.80    2.90
  10  13   0   20.30    2.80
  10  13   0   19.00    3.00
  10  13   0   18.80    3.40
 -11 -13   0    6.70    2.50
  11  13   0    6.10    2.60
  11  13   0    3.00    2.10
  11  13   0    4.30    2.20
  11  13   0    8.00    3.00
  11  13   0    6.70    2.50
  11  13   0    7.50    2.50
 -12 -13   0   -0.20    2.40
  12  13   0    4.80    2.60
  12  13   0   -0.40    2.40
  12  13   0    0.10    2.50
  12  13   0   -1.40    2.70
  12  13   0    3.60    2.60
 -13 -13   0    0.90    2.50
  13  13   0    6.70    2.90
  13  13   0    5.80    2.90
  13  13   0    0.00    2.60
  13  13   0   -1.40    2.30
  13  13   0    0.30    2.60
 -14 -13   0    8.70    2.90
  14  13   0    4.10    2.80
  14  13   0    3.80    3.10
  14  13   0    2.00    2.70
  14  13   0    8.40    3.20
  14  13   0    7.50    3.30
 -15 -13   0   -0.60    2.60
  15  13   0    3.10    2.70
  15  13   0    3.40    2.80
  15  13   0    8.80    3.50
  15  13   0    4.30    3.30
  15  13   0    5.80    3.10
 -16 -13   0    0.50    2.80
  16  13   0   -0.30    2.90
  16  13   0    4.30    3.30
  16  13   0    1.40    3.40
  16  13   0    3.10    2.70
  16  13   0    0.00    3.50
   8 -14   0   -1.10    1.50
   8 -14   0   -0.30    2.60
  -8  14   0    0.50    2.20
  -8  14   0   -0.10    1.60
  -8  14   0    2.50    1.80
   7 -14   0    1.20    1.40
   7 -14   0    2.40    2.50
  -7  14   0    0.30    2.40
  -7  14   0    0.10    1.40
  -7  14   0    2.10    1.50
   6 -14   0    0.80    1.10
   6 -14   0    1.90    2.40
  -6  14   0   -0.10    2.20
  -6  14   0    2.40    1.20
  -6  14   0    0.60    1.20
   5 -14   0   -1.60    2.10
   5 -14   0    1.50    1.00
  -5  14   0    1.40    1.10
  -5  14   0    1.20    1.10
  -5  14   0    0.30    1.80
   4 -14   0   10.00    2.60
   4 -14   0    8.10    1.10
  -4  14   0    9.20    1.20
  -4  14   0    9.20    2.80
  -4  14   0    9.60    2.60
  -4  14   0    8.70    1.10
   3 -14   0    2.20    1.90
   3 -14   0    0.80    0.70
   3 -14   0    1.10    2.00
  -3  14   0   -1.20    2.20
  -3  14   0    0.50    1.80
  -3  14   0    1.50    0.80
  -3  14   0    1.10    2.20
  -3  14   0   -0.20    0.80
  -3  14   0   -0.50    2.00
   2 -14   0   17.60    2.80
   2 -14   0   22.20    3.00
  -2  14   0   19.90    2.80
  -2  14   0   17.10    2.80
  -2  14   0   18.60    2.90
  -2  14   0   17.50    3.10
   1 -14   0    2.40    2.10
   1 -14   0    4.00    1.90
  -1  14   0    2.80    2.30
  -1  14   0   -0.40    2.00
  -1  14   0    3.10    2.20
  -1  14   0    0.90    2.00
   0 -14   0    2.40    2.10
   0  14   0    3.60    2.20
   0  14   0    4.70    2.50
   0  14   0    8.40    2.30
   0  14   0    4.90    2.20
  -1 -14   0    0.60    0.60
  -1 -14   0    1.00    2.10
   1  14   0   -0.40    1.80
   1  14   0   -1.40    0.70
   1  14   0    1.30    2.10
   1  14   0    0.90    0.80
   1  14   0    1.50    2.30
   1  14   0    2.10    2.20
  -2 -14   0    2.90    2.30
  -2 -14   0    3.80    0.90
   2  14   0    5.10    0.90
   2  14   0    2.70    2.20
   2  14   0    3.40    1.90
   2  14   0    5.20    0.90
   2  14   0    4.20    1.00
   2  14   0    5.10    1.00
   2  14   0    7.90    2.30
   2  14   0    4.70    2.30
  -3 -14   0   11.80    2.50
  -3 -14   0   13.60    1.40
   3  14   0   15.30    1.40
   3  14   0   16.60    2.70
   3  14   0   15.70    1.40
   3  14   0   10.10    2.30
   3  14   0   13.30    1.40
   3  14   0   12.40    2.80
   3  14   0   17.10    2.90
   3  14   0   14.00    1.60
  -4 -14   0   -0.90    2.30
   4  14   0    0.50    2.20
   4  14   0    2.80    2.20
   4  14   0    0.90    1.20
   4  14   0   -0.50    1.20
   4  14   0    2.50    1.90
   4  14   0    1.60    2.20
  -5 -14   0    0.00    2.40
   5  14   0    1.80    1.90
   5  14   0    0.10    1.30
   5  14   0    0.10    1.90
   5  14   0   -0.90    1.80
   5  14   0    1.30    2.20
   5  14   0   -0.50    1.20
  -6 -14   0   13.50    2.90
   6  14   0   12.40    2.80
   6  14   0   10.30    1.70
   6  14   0   16.70    2.50
   6  14   0   13.00    1.90
   6  14   0   12.10    2.30
   6  14   0   10.60    2.30
  -7 -14   0    5.60    2.10
   7  14   0    3.50    1.60
   7  14   0    3.90    1.60
   7  14   0    6.50    2.50
   7  14   0    6.00    2.80
   7  14   0    2.80    2.10
   7  14   0    3.00    2.10
  -8 -14   0    7.70    2.70
   8  14   0    2.30    2.20
   8  14   0    6.70    1.90
   8  14   0    7.00    2.10
   8  14   0    4.80    2.70
   8  14   0    8.40    2.20
   8  14   0    4.20    2.30
  -9 -14   0    3.50    2.30
   9  14   0    3.50    2.80
   9  14   0   -2.10    1.90
   9  14   0    2.40    2.10
   9  14   0    0.90    2.40
   9  14   0   -0.20    1.90
   9  14   0    0.50    2.50
 -10 -14   0    4.60    2.80
  10  14   0    2.40    2.30
  10  14   0    6.20    2.30
  10  14   0    3.50    2.40
  10  14   0    6.60    2.80
  10  14   0    5.70    2.90
 -11 -14   0   -4.10    2.40
  11  14   0   -1.80    2.40
  11  14   0    0.00    2.30
  11  14   0    1.70    2.60
  11  14   0    3.70    2.50
  11  14   0    0.20    2.70
 -12 -14   0    2.80    2.50
  12  14   0    2.90    2.70
  12  14   0    2.80    2.80
  12  14   0    3.30    2.80
  12  14   0    3.80    2.60
  12  14   0    1.30    2.50
 -13 -14   0    7.00    3.00
  13  14   0    6.60    2.90
  13  14   0    3.10    3.00
  13  14   0    7.20    3.20
  13  14   0    3.40    2.80
  13  14   0    4.00    3.00
 -14 -14   0   -1.10    2.70
  14  14   0    0.70    2.80
  14  14   0   -0.20    2.60
  14  14   0    1.00    3.00
  14  14   0    0.30    2.60
  14  14   0   -0.20    2.90
 -15 -14   0    4.30    2.80
  15  14   0    4.40    2.90
  15  14   0    0.90    3.20
  15  14   0    2.10    3.40
  15  14   0   -3.10    2.50
  15  14   0   -1.60    2.90
 -16 -14   0    1.80    3.30
  16  14   0    0.30    3.10
  16  14   0    1.40    3.20
  16  14   0    4.20    3.50
  16  14   0   -1.00    2.70
  16  14   0   -1.30    2.60
   7 -15   0    3.90    1.50
   7 -15   0    1.20    2.60
  -7  15   0    4.20    3.00
  -7  15   0   -0.20    1.50
  -7  15   0    3.20    1.60
   6 -15   0    2.90    1.30
   6 -15   0    4.60    2.30
  -6  15   0    1.00    1.40
  -6  15   0   -0.10    1.30
  -6  15   0    0.50    2.50
   5 -15   0   -0.20    1.00
   5 -15   0   -1.80    2.20
  -5  15   0    0.80    1.20
  -5  15   0   -2.00    2.10
  -5  15   0    2.50    1.10
   4 -15   0    1.10    2.20
   4 -15   0    0.50    0.80
  -4  15   0   -0.50    2.70
  -4  15   0   -1.10    2.20
  -4  15   0   -0.40    0.90
  -4  15   0   -0.30    0.90
   3 -15   0    2.80    0.80
   3 -15   0    6.80    2.30
   3 -15   0    4.10    2.20
  -3  15   0    5.70    2.40
  -3  15   0    5.50    0.90
  -3  15   0    4.50    0.90
  -3  15   0    6.20    2.40
  -3  15   0    5.80    2.40
  -3  15   0    4.90    2.60
   2 -15   0   20.00    3.00
   2 -15   0   17.60    2.90
  -2  15   0   22.30    3.20
  -2  15   0   19.70    3.30
  -2  15   0   18.70    3.10
  -2  15   0   23.50    3.30
   1 -15   0    1.50    2.10
   1 -15   0    2.40    2.10
  -1  15   0    7.00    2.60
  -1  15   0    2.90    2.40
  -1  15   0    2.00    2.30
  -1  15   0    2.80    2.50
   0 -15   0    6.40    2.40
   0  15   0   11.40    2.60
   0  15   0   10.60    2.70
   0  15   0   10.00    2.70
   0  15   0    8.70    2.70
  -1 -15   0   -0.40    0.60
  -1 -15   0   -1.90    2.10
   1  15   0   -2.20    2.10
   1  15   0    0.00    2.30
   1  15   0   -2.00    2.30
   1  15   0    0.20    0.80
   1  15   0   -2.00    1.90
   1  15   0   -1.40    0.80
  -2 -15   0    0.80    2.10
  -2 -15   0    0.60    0.90
   2  15   0    1.60    2.30
   2  15   0    1.80    2.00
   2  15   0    2.20    1.00
   2  15   0    0.00    1.80
   2  15   0    2.40    0.90
   2  15   0    5.30    2.40
   2  15   0    2.50    1.00
   2  15   0    3.30    0.90
   2  15   0    1.50    1.00
  -3 -15   0    2.90    2.50
  -3 -15   0    0.50    1.00
   3  15   0    0.10    2.10
   3  15   0    0.80    1.10
   3  15   0    0.20    1.90
   3  15   0    0.40    1.00
   3  15   0    3.10    1.90
   3  15   0   -0.10    1.00
   3  15   0    0.00    1.90
  -4 -15   0   -2.10    2.30
   4  15   0    1.60    1.20
   4  15   0    6.60    2.50
   4  15   0    2.10    2.30
   4  15   0   -0.50    1.30
   4  15   0    1.80    1.90
   4  15   0    2.50    2.40
  -5 -15   0    0.50    2.50
   5  15   0   -0.90    1.30
   5  15   0    0.00    1.80
   5  15   0    0.90    2.50
   5  15   0   -1.90    2.10
   5  15   0    1.60    1.40
   5  15   0    1.60    1.90
  -6 -15   0    7.10    2.50
   6  15   0    7.10    1.60
   6  15   0    2.20    1.90
   6  15   0    5.40    2.60
   6  15   0    7.40    1.70
   6  15   0    6.20    2.40
   6  15   0    5.40    2.40
  -7 -15   0   20.70    3.10
   7  15   0   27.90    2.50
   7  15   0   24.30    2.40
   7  15   0   22.90    3.40
   7  15   0   19.40    2.80
   7  15   0   26.40    3.70
   7  15   0   21.30    2.80
  -8 -15   0    7.50    2.40
   8  15   0    7.40    2.40
   8  15   0    4.30    2.30
   8  15   0    8.60    2.90
   8  15   0    8.20    2.30
   8  15   0    9.30    1.90
   8  15   0    8.70    2.20
  -9 -15   0   35.10    4.20
   9  15   0   34.60    3.50
   9  15   0   38.80    4.30
   9  15   0   35.80    3.40
   9  15   0   41.20    4.40
   9  15   0   40.70    4.50
 -10 -15   0   15.20    3.10
  10  15   0   12.40    2.70
  10  15   0   10.30    3.10
  10  15   0    7.00    3.10
  10  15   0   14.60    2.70
  10  15   0   11.30    3.10
 -11 -15   0   28.50    3.80
  11  15   0   24.80    3.90
  11  15   0   27.70    3.90
  11  15   0   26.30    3.60
  11  15   0   21.30    3.30
  11  15   0   22.10    3.40
 -12 -15   0    1.40    3.00
  12  15   0   -1.50    2.10
  12  15   0   -2.40    2.80
  12  15   0   -0.10    2.30
  12  15   0    3.20    2.70
  12  15   0   -3.20    2.40
 -13 -15   0   -0.50    2.80
  13  15   0    3.60    2.90
  13  15   0    1.10    2.80
  13  15   0    3.30    2.90
  13  15   0   -1.10    3.00
  13  15   0    2.00    3.00
 -14 -15   0    1.20    2.90
  14  15   0   -0.90    2.80
  14  15   0   -3.40    2.90
  14  15   0   -3.20    2.60
  14  15   0    0.70    3.10
  14  15   0   -0.80    2.40
 -15 -15   0    1.90    3.00
  15  15   0    3.60    3.30
  15  15   0    2.00    3.00
  15  15   0    2.10    2.90
  15  15   0    6.70    3.20
  15  15   0    4.90    3.20
   6 -16   0   -2.90    2.20
   6 -16   0    1.00    1.20
  -6  16   0   -0.50    1.40
  -6  16   0    2.30    1.40
  -6  16   0   -0.90    2.40
   5 -16   0    7.40    2.70
   5 -16   0    8.10    1.30
  -5  16   0   12.00    1.50
  -5  16   0   10.70    3.10
  -5  16   0   10.30    1.50
   4 -16   0    3.50    2.30
   4 -16   0    2.80    0.90
  -4  16   0    0.70    2.40
  -4  16   0    1.50    1.00
  -4  16   0    3.60    1.10
  -4  16   0    2.10    2.60
   3 -16   0    1.80    2.20
  -3  16   0    6.30    2.60
  -3  16   0    0.50    2.40
   2 -16   0   -3.50    1.80
   2 -16   0   -2.80    1.90
  -2  16   0   -0.80    2.10
  -2  16   0    1.50    2.60
  -2  16   0   -4.00    2.20
  -2  16   0    0.90    2.30
   1 -16   0   13.90    2.80
   1 -16   0   16.10    3.00
  -1  16   0   10.00    2.70
  -1  16   0   10.70    2.80
  -1  16   0   14.20    2.90
  -1  16   0   12.70    3.20
   0 -16   0   14.60    2.90
   0 -16   0   10.60    2.50
   0  16   0    7.60    2.60
   0  16   0   17.90    3.00
   0  16   0   16.40    3.00
   0  16   0    8.50    2.70
  -1 -16   0   43.70    2.10
  -1 -16   0   45.40    4.40
   1  16   0   48.80    4.30
   1  16   0   47.40    4.50
   1  16   0   46.60    2.20
   1  16   0   45.80    4.20
   1  16   0   46.90    2.20
   1  16   0   40.40    4.30
  -2 -16   0   -0.10    2.20
  -2 -16   0    0.50    0.90
   2  16   0   -0.20    2.60
   2  16   0    1.70    2.20
   2  16   0    1.60    1.00
   2  16   0    2.70    2.30
   2  16   0    3.20    1.00
   2  16   0    2.90    2.40
   2  16   0    0.30    0.90
  -3 -16   0   -2.10    2.00
   3  16   0   -0.10    2.40
   3  16   0    4.00    2.20
   3  16   0    0.30    1.10
   3  16   0    1.70    2.00
   3  16   0   -0.20    1.10
   3  16   0   -0.20    2.50
  -4 -16   0    5.60    2.90
   4  16   0    7.70    2.80
   4  16   0    9.80    1.60
   4  16   0    9.40    1.60
   4  16   0    8.50    2.80
   4  16   0   11.50    2.30
   4  16   0   13.60    2.90
  -5 -16   0   -0.70    2.70
   5  16   0   -1.10    2.40
   5  16   0    4.00    2.50
   5  16   0   -0.40    1.40
   5  16   0   -1.40    1.40
   5  16   0    4.10    2.50
   5  16   0    3.40    2.00
  -6 -16   0    6.40    3.10
   6  16   0   14.60    2.90
   6  16   0    9.00    2.30
   6  16   0    7.50    2.90
   6  16   0   12.60    2.00
   6  16   0   11.10    2.90
   6  16   0   14.00    2.10
  -7 -16   0    2.50    2.50
   7  16   0    3.40    1.70
   7  16   0    3.70    1.70
   7  16   0    1.80    2.70
   7  16   0    4.80    2.20
   7  16   0    2.60    2.00
  -8 -16   0    2.80    2.20
   8  16   0    1.10    1.80
   8  16   0    2.00    2.40
   8  16   0    7.00    2.30
   8  16   0    5.70    2.90
   8  16   0    1.70    1.60
  -9 -16   0    7.50    2.70
   9  16   0    9.50    3.10
   9  16   0   11.80    2.30
   9  16   0    6.00    2.40
   9  16   0    6.20    3.00
   9  16   0    7.30    3.10
 -10 -16   0   -0.70    2.30
  10  16   0   -0.70    2.30
  10  16   0    0.60    2.80
  10  16   0   -0.80    2.20
  10  16   0    2.10    2.70
  10  16   0   -6.00    2.70
 -11 -16   0   -2.50    2.80
  11  16   0    0.60    2.90
  11  16   0    0.20    2.30
  11  16   0   -1.00    2.50
  11  16   0    0.10    2.80
  11  16   0    3.20    2.90
 -12 -16   0   -0.70    2.90
  12  16   0    3.00    2.90
  12  16   0    6.20    2.80
  12  16   0    3.90    3.00
  12  16   0    4.50    3.00
  12  16   0    2.40    3.20
 -13 -16   0    1.40    2.60
  13  16   0    2.50    2.80
  13  16   0    7.80    3.20
  13  16   0    2.50    3.00
  13  16   0    3.30    2.70
  13  16   0   -2.50    3.30
 -14 -16   0   -6.10    2.60
  14  16   0    2.90    3.20
  14  16   0   -1.00    2.80
  14  16   0   -0.60    2.90
  14  16   0   -1.50    3.00
  14  16   0    0.90    3.00
 -15 -16   0    4.20    3.00
  15  16   0   -2.60    3.00
  15  16   0    0.40    3.10
  15  16   0    5.00    3.30
  15  16   0   -0.70    3.00
  15  16   0    2.00    3.00
   5 -17   0   -1.50    2.20
   5 -17   0    0.20    1.00
  -5  17   0    0.90    2.60
  -5  17   0    2.50    1.30
  -5  17   0   -0.40    1.10
   4 -17   0   -1.20    2.10
  -4  17   0   -1.10    1.00
  -4  17   0   -0.20    2.70
  -4  17   0    3.00    2.60
   3 -17   0    0.90    2.30
  -3  17   0    1.20    2.60
  -3  17   0    5.10    2.80
   2 -17   0   -0.80    2.00
   2 -17   0   -1.80    2.40
  -2  17   0   -2.00    2.00
  -2  17   0   -3.40    2.30
  -2  17   0   -2.10    2.40
  -2  17   0    0.30    2.40
   1 -17   0   -0.10    2.50
   1 -17   0    2.70    2.20
  -1  17   0   -1.20    2.10
  -1  17   0   -0.40    2.30
  -1  17   0    1.40    2.40
  -1  17   0    0.70    2.40
   0 -17   0    5.50    2.30
   0 -17   0    5.20    2.60
   0  17   0    3.80    2.60
   0  17   0    5.20    2.50
   0  17   0    9.30    2.70
   0  17   0    6.10    2.90
  -1 -17   0   -1.90    2.40
   1  17   0    0.30    0.80
   1  17   0    0.40    2.10
   1  17   0   -0.40    2.30
   1  17   0   -0.70    2.30
   1  17   0   -3.30    2.50
  -2 -17   0   -3.10    2.40
   2  17   0    2.70    2.10
   2  17   0   -0.10    1.00
   2  17   0   -0.30    2.30
   2  17   0   -1.90    0.90
   2  17   0   -1.20    2.30
   2  17   0    3.40    2.60
  -3 -17   0   -0.80    2.30
   3  17   0   -0.60    2.50
   3  17   0   -0.60    2.10
   3  17   0   -1.20    1.00
   3  17   0    4.50    2.50
   3  17   0    1.90    2.70
   3  17   0    1.50    1.20
  -4 -17   0    4.50    3.10
   4  17   0    1.80    2.20
   4  17   0    7.60    1.60
   4  17   0    5.00    2.70
   4  17   0    2.30    2.60
   4  17   0   10.50    2.90
   4  17   0    4.40    1.50
  -5 -17   0    6.30    3.10
   5  17   0    6.00    2.90
   5  17   0    5.40    2.80
   5  17   0    3.90    2.30
   5  17   0    7.30    1.70
   5  17   0    7.30    1.70
   5  17   0    9.60    2.50
  -6 -17   0   -2.50    2.70
   6  17   0    0.00    2.00
   6  17   0    1.40    2.20
   6  17   0    2.30    2.60
   6  17   0    1.50    1.60
   6  17   0   -1.30    1.50
  -7 -17   0   13.00    3.40
   7  17   0   12.50    2.20
   7  17   0    9.00    3.10
   7  17   0   12.90    3.10
   7  17   0   14.60    2.30
   7  17   0   14.20    3.10
  -8 -17   0   12.70    3.20
   8  17   0   15.80    2.30
   8  17   0   10.60    2.70
   8  17   0    8.90    3.40
   8  17   0   14.40    2.40
   8  17   0    8.10    2.60
  -9 -17   0   31.20    4.00
   9  17   0   29.60    4.20
   9  17   0   26.70    4.00
   9  17   0   22.90    4.10
   9  17   0   29.80    3.40
   9  17   0   33.20    3.30
 -10 -17   0    5.20    2.80
  10  17   0   10.00    3.20
  10  17   0    7.60    3.30
  10  17   0    3.30    2.50
  10  17   0    8.40    2.70
  10  17   0    2.90    3.00
 -11 -17   0   10.20    3.50
  11  17   0   12.80    3.50
  11  17   0   14.50    3.00
  11  17   0   11.10    3.60
  11  17   0    6.70    2.90
  11  17   0   10.80    3.70
 -12 -17   0    9.80    3.60
  12  17   0   12.80    3.20
  12  17   0    9.70    3.80
  12  17   0   17.20    3.90
  12  17   0   12.40    3.10
  12  17   0   10.00    3.20
 -13 -17   0    1.30    3.30
  13  17   0    7.00    3.40
  13  17   0    2.50    2.90
  13  17   0    1.60    3.20
  13  17   0    8.20    3.10
  13  17   0    1.50    2.50
 -14 -17   0   -0.10    2.80
  14  17   0    0.50    3.10
  14  17   0   -2.30    3.00
  14  17   0   -2.20    2.90
  14  17   0    0.90    3.50
  14  17   0    1.10    3.10
   3 -18   0    4.50    2.50
  -3  18   0    5.90    3.00
  -3  18   0    8.60    2.90
   2 -18   0   13.20    2.90
  -2  18   0   15.00    3.40
  -2  18   0   14.00    3.70
   1 -18   0    3.90    2.30
   1 -18   0    3.10    2.70
  -1  18   0    5.60    2.80
  -1  18   0    3.60    2.80
  -1  18   0    8.70    3.10
  -1  18   0    5.40    2.90
   0 -18   0   11.60    3.20
   0 -18   0    9.60    2.60
   0  18   0    9.60    3.00
   0  18   0   16.70    3.20
   0  18   0   14.60    3.20
   0  18   0    7.30    2.80
  -1 -18   0   -1.70    2.60
  -1 -18   0   -1.30    1.90
   1  18   0    0.20    2.40
   1  18   0    2.50    2.60
   1  18   0    0.70    2.10
   1  18   0    0.60    0.90
   1  18   0   -2.40    2.30
  -2 -18   0    0.50    2.80
   2  18   0   10.00    2.60
   2  18   0    6.90    1.20
   2  18   0    9.20    2.70
   2  18   0    7.30    2.90
   2  18   0    5.70    3.00
   2  18   0    8.00    1.30
  -3 -18   0   19.90    3.70
   3  18   0   16.20    1.70
   3  18   0   16.30    3.00
   3  18   0   15.60    3.40
   3  18   0   14.00    3.30
   3  18   0   17.50    1.80
   3  18   0   16.00    3.50
  -4 -18   0   -2.20    2.70
   4  18   0   -0.10    1.20
   4  18   0    1.00    2.70
   4  18   0   -1.20    1.30
   4  18   0   -1.50    1.30
   4  18   0    1.40    2.60
   4  18   0    1.10    2.20
  -5 -18   0   -3.40    2.80
   5  18   0   -1.50    2.70
   5  18   0   -0.20    1.50
   5  18   0    3.80    2.80
   5  18   0   -2.70    2.50
   5  18   0   -1.30    1.50
  -6 -18   0    0.00    3.00
   6  18   0    1.90    1.70
   6  18   0   -2.30    2.70
   6  18   0    4.50    3.00
   6  18   0    2.50    1.80
   6  18   0    1.40    2.60
  -7 -18   0    6.70    3.00
   7  18   0    4.10    2.90
   7  18   0    8.10    3.00
   7  18   0    6.20    2.10
   7  18   0    6.00    2.90
   7  18   0   10.50    2.20
  -8 -18   0   -0.90    2.20
   8  18   0    0.00    2.60
   8  18   0    1.10    1.80
   8  18   0   -0.60    2.60
   8  18   0    3.00    2.80
   8  18   0    3.30    1.90
  -9 -18   0   -1.80    2.70
   9  18   0   -1.90    1.90
   9  18   0   -0.30    1.90
   9  18   0   -0.70    2.50
   9  18   0    0.00    2.80
   9  18   0   -1.00    2.20
 -10 -18   0    4.60    3.20
  10  18   0    2.80    3.00
  10  18   0   -1.40    2.40
  10  18   0   -1.50    2.60
  10  18   0    1.60    2.50
  10  18   0    0.30    2.90
 -11 -18   0   -2.90    3.10
  11  18   0   -2.80    3.00
  11  18   0   -2.50    2.50
  11  18   0    3.20    3.20
  11  18   0   -3.90    2.50
  11  18   0   -3.00    2.70
 -12 -18   0    5.30    3.70
  12  18   0    5.00    3.40
  12  18   0   -1.20    2.80
  12  18   0    4.00    3.00
  12  18   0    8.80    3.40
  12  18   0    3.60    2.80
 -13 -18   0    6.80    3.30
  13  18   0   11.30    3.50
  13  18   0   11.50    3.90
  13  18   0   13.00    3.90
  13  18   0   12.40    3.50
  13  18   0   14.80    3.50
   1 -19   0    2.80    2.50
  -1  19   0   -0.40    2.60
  -1  19   0    0.00    2.50
  -1  19   0   -0.20    2.40
  -1  19   0    0.40    3.00
   0 -19   0    0.70    2.20
   0 -19   0    3.00    2.90
   0  19   0    5.30    2.90
   0  19   0    1.10    2.30
   0  19   0   -3.40    2.50
   0  19   0    1.40    3.10
  -1 -19   0    1.80    2.20
  -1 -19   0   -2.20    3.00
   1  19   0    3.80    2.80
   1  19   0    0.50    2.30
   1  19   0   -3.60    2.40
   1  19   0   -1.90    2.60
  -2 -19   0    7.50    2.90
   2  19   0    9.20    3.00
   2  19   0    5.10    1.30
   2  19   0    9.60    2.80
   2  19   0    5.60    1.20
   2  19   0    8.30    3.00
  -3 -19   0    1.40    3.10
   3  19   0   -0.60    1.20
   3  19   0   -1.40    1.30
   3  19   0   -0.50    2.60
   3  19   0    4.10    2.90
   3  19   0    1.70    2.60
  -4 -19   0   -3.00    2.80
   4  19   0    0.90    1.50
   4  19   0    0.20    1.30
   4  19   0    1.40    3.00
   4  19   0   -0.90    2.70
   4  19   0   -0.40    2.30
  -5 -19   0   -0.30    3.00
   5  19   0    0.70    1.40
   5  19   0   -3.60    2.50
   5  19   0   -2.60    1.50
   5  19   0    3.90    2.80
   5  19   0    0.60    2.80
   5  19   0   -1.00    1.50
  -6 -19   0   21.70    4.10
   6  19   0   17.80    3.80
   6  19   0   19.20    2.50
   6  19   0   20.60    2.60
   6  19   0   28.70    4.10
   6  19   0   20.40    3.90
  -7 -19   0   16.40    3.60
   7  19   0   19.40    3.90
   7  19   0   20.90    3.60
   7  19   0   20.20    3.80
   7  19   0   19.80    2.80
   7  19   0   18.70    2.70
  -8 -19   0   -2.40    2.90
   8  19   0    4.60    3.30
   8  19   0    2.20    2.70
   8  19   0    0.90    2.70
   8  19   0    0.90    2.00
   8  19   0    3.50    2.00
  -9 -19   0   13.30    3.10
   9  19   0    9.00    2.50
   9  19   0   14.10    2.70
   9  19   0   10.20    3.10
   9  19   0   12.30    3.50
   9  19   0   14.60    3.60
 -10 -19   0    9.60    3.50
  10  19   0    4.70    3.40
  10  19   0   16.50    3.70
  10  19   0    5.50    2.70
  10  19   0    8.90    2.50
  10  19   0   10.60    3.60
 -11 -19   0    3.90    3.60
  11  19   0    3.00    3.50
  11  19   0    5.30    3.70
  11  19   0    0.10    2.90
  11  19   0    6.80    2.90
  11  19   0    4.60    3.00
  -2 -20   0   15.80    4.10
   2  20   0   18.20    3.80
   2  20   0   23.70    3.90
   2  20   0   24.70    1.90
   2  20   0   18.00    3.70
  -3 -20   0   13.30    3.70
   3  20   0   11.40    3.50
   3  20   0   13.40    1.60
   3  20   0   16.40    3.50
   3  20   0    9.20    3.10
   3  20   0   14.80    1.90
  -4 -20   0    0.30    2.80
   4  20   0    6.80    1.80
   4  20   0    3.70    2.90
   4  20   0    2.60    1.50
   4  20   0    2.00    2.60
   4  20   0    4.00    2.80
  -5 -20   0    2.70    3.40
   5  20   0    1.20    1.60
   5  20   0    5.00    3.20
   5  20   0    0.40    1.80
   5  20   0    3.10    3.10
   5  20   0   -0.30    3.00
  -6 -20   0    0.70    3.10
   6  20   0    0.10    1.70
   6  20   0    0.90    2.70
   6  20   0    4.50    2.10
   6  20   0    5.70    3.40
   6  20   0    8.50    3.30
   6  20   0    1.40    2.00
  -7 -20   0    0.00    3.40
   7  20   0   -2.30    2.70
   7  20   0   -0.10    2.80
   7  20   0    5.00    2.30
   7  20   0   -1.30    2.90
   7  20   0    1.50    1.90
   7  20   0    2.30    2.20
  -8 -20   0   -5.60    3.00
   8  20   0    4.90    3.10
   8  20   0    0.00    2.20
   8  20   0    0.10    2.20
   8  20   0    4.40    3.00
   8  20   0    0.10    2.60
  -9 -20   0    9.10    3.50
   9  20   0    2.10    3.00
   9  20   0   10.90    2.60
   9  20   0   12.60    2.70
   9  20   0   12.50    3.40
   9  20   0    9.70    3.40
   8  20  -1    0.80    2.20
   8  20  -1    0.00    1.90
   8  20  -1    0.20    2.30
   8  20  -1    2.80    3.50
   8  20  -1    1.90    2.90
   8  20  -1   -2.70    3.00
  -8 -20   1    1.80    3.50
   7  20  -1    2.50    1.90
   7  20  -1    1.60    3.30
   7  20  -1    2.10    2.20
   7  20  -1   -2.50    2.10
   7  20  -1   -1.60    2.60
   7  20  -1   -0.50    2.90
  -7 -20   1    6.60    3.80
   6  20  -1    8.00    2.30
   6  20  -1    3.20    3.30
   6  20  -1   -1.10    3.20
   6  20  -1    5.80    3.40
   6  20  -1    7.50    2.00
  -6 -20   1    9.30    3.40
   5  20  -1    1.50    3.10
   5  20  -1   -1.40    1.60
   5  20  -1    8.20    3.20
   5  20  -1    4.10    2.00
   5  20  -1    5.90    3.60
  -5 -20   1    2.20    3.40
   4  20  -1   -0.10    3.10
   4  20  -1    1.30    1.60
   4  20  -1    1.00    2.70
   4  20  -1    2.30    2.90
   4  20  -1    3.20    1.80
  -4 -20   1    6.30    3.50
   3  20  -1    1.80    2.90
   3  20  -1   -0.20    1.30
   3  20  -1    4.80    3.20
   3  20  -1    0.70    1.50
   3  20  -1    2.00    3.10
  -3 -20   1    1.30    3.30
  10  19  -1    1.30    2.40
  10  19  -1    1.80    3.20
  10  19  -1    6.00    2.90
  10  19  -1    3.10    2.80
  10  19  -1    7.70    3.60
 -10 -19   1    7.80    3.50
   9  19  -1    5.30    3.30
   9  19  -1    5.10    2.40
   9  19  -1    6.00    3.10
   9  19  -1    8.60    2.40
   9  19  -1    4.70    2.90
  -9 -19   1    7.00    2.90
   8  19  -1    2.60    2.80
   8  19  -1    0.30    2.40
   8  19  -1    1.60    2.00
   8  19  -1   -1.00    2.80
   8  19  -1   -0.20    1.60
   8  19  -1    5.80    2.30
  -8 -19   1    4.10    3.30
   7  19  -1   -1.90    2.70
   7  19  -1    0.50    2.90
   7  19  -1    0.80    2.10
   7  19  -1    2.00    3.00
   7  19  -1    0.50    2.10
   7  19  -1   -1.00    1.80
  -7 -19   1   -1.50    2.90
   6  19  -1    5.40    2.00
   6  19  -1    8.30    2.20
   6  19  -1    7.20    3.30
   6  19  -1    7.90    3.50
   6  19  -1    5.40    1.90
   6  19  -1    7.30    3.40
  -6 -19   1    7.20    3.50
   5  19  -1    3.10    2.90
   5  19  -1   -0.20    2.80
   5  19  -1    0.60    1.70
   5  19  -1   -1.50    2.70
   5  19  -1    1.30    1.50
  -5 -19   1   -4.00    3.00
   4  19  -1    1.50    2.70
   4  19  -1    0.10    1.40
   4  19  -1   -1.40    2.70
   4  19  -1    2.60    1.70
   4  19  -1    0.80    2.50
  -4 -19   1    4.60    3.40
   3  19  -1    3.80    3.00
   3  19  -1    2.40    1.30
   3  19  -1    1.60    1.50
   3  19  -1    0.20    2.80
   3  19  -1    2.40    3.00
  -3 -19   1    1.80    3.20
   2  19  -1   14.30    3.40
   2  19  -1   14.10    1.50
   2  19  -1   12.30    3.00
   2  19  -1   12.70    3.10
   2  19  -1   12.70    1.70
   2  19  -1   14.50    3.60
  -2 -19   1   14.60    3.70
   1  19  -1   20.70    3.80
   1  19  -1   16.40    3.30
   1  19  -1   26.70    4.00
   1  19  -1   24.90    1.90
   1  19  -1   16.50    3.50
  -1 -19   1   23.70    4.30
  -1 -19   1   22.60    3.30
   0  19  -1    3.20    3.10
   0  19  -1   -0.50    2.80
   0  19  -1    3.70    2.90
   0  19  -1   -1.40    0.90
   0  19  -1    2.30    2.60
   0 -19   1    3.30    2.40
   0 -19   1   -4.10    2.50
  -1  19  -1    4.40    2.70
  -1  19  -1    1.90    2.90
  -1  19  -1    0.30    2.80
  -1  19  -1   -3.70    2.40
   1 -19   1   -0.10    2.40
  12  18  -1   -1.60    3.00
  12  18  -1   -5.70    2.60
  12  18  -1    0.90    2.80
  12  18  -1   -5.50    2.80
  12  18  -1    3.20    2.90
 -12 -18   1    7.10    3.40
  11  18  -1    2.80    2.80
  11  18  -1    1.30    3.20
  11  18  -1    1.30    3.00
  11  18  -1    5.30    3.40
  11  18  -1    1.50    2.70
 -11 -18   1    2.10    3.50
  10  18  -1    5.80    2.70
  10  18  -1    8.90    3.20
  10  18  -1   10.90    2.80
  10  18  -1    8.30    3.50
  10  18  -1    7.00    3.00
 -10 -18   1    9.00    3.60
   9  18  -1    6.00    3.20
   9  18  -1    4.10    2.10
   9  18  -1    4.80    2.60
   9  18  -1    2.40    2.20
   9  18  -1   -0.10    2.60
  -9 -18   1    0.50    2.90
   8  18  -1    3.80    2.90
   8  18  -1    2.30    3.20
   8  18  -1    6.80    2.20
   8  18  -1    1.20    2.60
   8  18  -1    4.00    2.00
  -8 -18   1    3.90    2.60
   7  18  -1    4.30    3.00
   7  18  -1    2.90    2.90
   7  18  -1    7.00    2.20
   7  18  -1   10.90    3.10
   7  18  -1    8.20    2.20
  -7 -18   1    8.20    3.00
   6  18  -1    4.40    1.60
   6  18  -1    2.10    1.80
   6  18  -1    4.80    2.80
   6  18  -1    1.20    1.80
   6  18  -1    3.60    2.60
   6  18  -1    1.80    2.90
  -6 -18   1    4.50    3.20
   5  18  -1    3.90    2.80
   5  18  -1   -0.60    2.70
   5  18  -1   -2.80    1.50
   5  18  -1   -1.10    1.60
   5  18  -1   -1.80    2.50
   5  18  -1    1.30    1.40
  -5 -18   1   -3.40    2.80
   4  18  -1    6.70    2.70
   4  18  -1   15.10    1.90
   4  18  -1    9.00    1.70
   4  18  -1    9.70    2.80
   4  18  -1   10.40    3.10
  -4 -18   1    9.00    3.30
   3  18  -1    0.60    2.20
   3  18  -1   -0.10    1.20
   3  18  -1    2.70    2.80
   3  18  -1    0.50    1.40
   3  18  -1   -0.90    2.10
   3  18  -1   -2.60    2.70
  -3 -18   1    0.80    3.00
   2  18  -1    4.70    2.40
   2  18  -1    1.90    2.30
   2  18  -1    3.20    2.70
   2  18  -1   -0.40    2.50
   2  18  -1    0.90    1.20
   2  18  -1    0.20    1.10
  -2 -18   1    2.30    2.90
   1  18  -1    0.20    1.00
   1  18  -1    0.50    2.70
   1  18  -1    1.10    2.60
   1  18  -1    2.60    2.60
   1  18  -1    0.10    0.90
   1  18  -1   -1.00    2.50
  -1 -18   1    0.30    2.80
   0  18  -1    0.30    2.60
   0  18  -1    4.40    2.70
   0  18  -1    2.30    2.50
   0  18  -1    4.00    2.60
   0 -18   1   -0.50    2.20
   0 -18   1    3.90    2.90
  -1  18  -1   -2.90    2.30
  -1  18  -1    3.30    2.60
  -1  18  -1   -1.50    2.30
  -1  18  -1    4.50    3.20
   1 -18   1    5.10    2.50
   1 -18   1   -0.40    2.50
  -2  18  -1    5.50    3.30
  -2  18  -1    2.40    2.70
   2 -18   1    4.50    2.40
  -3  18  -1   -0.80    2.60
  -3  18  -1    1.00    2.80
  -3  18  -1    1.10    1.10
   3 -18   1    0.80    2.50
  13  17  -1    2.20    2.90
  13  17  -1    0.60    2.80
  13  17  -1    3.20    3.50
  13  17  -1    0.10    3.00
  13  17  -1   -3.00    3.00
 -13 -17   1    5.50    3.60
  12  17  -1    3.80    2.80
  12  17  -1    6.20    3.20
  12  17  -1    6.00    3.00
  12  17  -1    2.90    3.20
  12  17  -1    0.60    3.30
 -12 -17   1    2.20    3.30
  11  17  -1    8.10    3.30
  11  17  -1    6.60    2.80
  11  17  -1    2.10    3.40
  11  17  -1    9.30    3.50
  11  17  -1    4.90    2.70
 -11 -17   1    7.30    3.30
  10  17  -1   12.40    3.30
  10  17  -1   10.60    2.80
  10  17  -1    4.90    3.20
  10  17  -1   12.00    2.80
  10  17  -1    8.10    3.30
 -10 -17   1   10.90    3.60
   9  17  -1    4.70    2.20
   9  17  -1    3.40    3.00
   9  17  -1    7.50    2.90
   9  17  -1    8.20    3.10
   9  17  -1    6.90    2.50
  -9 -17   1   12.00    3.20
   8  17  -1    4.00    1.90
   8  17  -1    3.80    3.10
   8  17  -1    2.70    2.50
   8  17  -1   -0.40    1.80
   8  17  -1    5.00    2.60
  -8 -17   1   -0.70    2.10
   7  17  -1    0.50    1.70
   7  17  -1    3.40    2.30
   7  17  -1   -0.40    2.30
   7  17  -1   -2.30    2.50
   7  17  -1    0.20    1.80
  -7 -17   1   -1.70    2.60
   6  17  -1   -1.40    1.60
   6  17  -1    3.00    2.70
   6  17  -1    0.50    2.10
   6  17  -1    3.00    1.70
   6  17  -1    1.20    2.60
  -6 -17   1    0.20    2.50
   5  17  -1   17.10    2.10
   5  17  -1   22.90    3.50
   5  17  -1   24.30    2.40
   5  17  -1   18.80    2.20
   5  17  -1   16.70    2.90
   5  17  -1   17.60    3.10
   5  17  -1   19.70    3.50
  -5 -17   1   19.30    3.80
   4  17  -1   -1.10    1.40
   4  17  -1    2.60    2.40
   4  17  -1    3.70    2.70
   4  17  -1    0.00    2.20
   4  17  -1    0.50    2.50
   4  17  -1    2.70    1.30
  -4 -17   1    3.40    2.50
   3  17  -1    0.60    1.20
   3  17  -1    1.50    1.20
   3  17  -1    2.70    2.70
   3  17  -1   -2.50    1.90
   3  17  -1   -0.40    2.00
   3  17  -1    3.60    2.80
  -3 -17   1   -1.10    2.70
   2  17  -1   10.30    2.80
   2  17  -1   12.30    1.50
   2  17  -1   10.80    2.80
   2  17  -1    9.50    2.90
   2  17  -1    9.40    1.30
   2  17  -1    9.50    3.00
  -2 -17   1   14.30    3.20
   1  17  -1    0.90    2.50
   1  17  -1    3.00    1.00
   1  17  -1    2.70    2.50
   1  17  -1    2.80    2.50
   1  17  -1    1.70    1.00
   1  17  -1    3.10    2.50
  -1 -17   1    2.20    2.80
   0  17  -1   45.20    4.50
   0  17  -1   36.20    4.20
   0  17  -1   47.80    4.80
   0  17  -1   39.50    4.30
   0 -17   1   47.30    4.20
   0 -17   1   49.50    4.80
  -1  17  -1    2.70    2.60
  -1  17  -1   -1.60    2.50
  -1  17  -1    0.30    2.30
  -1  17  -1   -0.10    2.30
   1 -17   1    0.20    2.40
   1 -17   1   -0.90    2.10
  -2  17  -1    7.70    2.90
  -2  17  -1    3.60    2.60
  -2  17  -1    7.40    2.70
  -2  17  -1    3.70    2.70
   2 -17   1    5.90    2.50
   2 -17   1    5.40    2.60
  -3  17  -1   15.60    3.30
  -3  17  -1   16.20    1.40
  -3  17  -1   16.10    3.50
   3 -17   1   15.60    3.00
  -4  17  -1   14.50    1.30
  -4  17  -1   13.60    1.50
  -4  17  -1    5.60    2.90
  -4  17  -1   11.50    3.30
   4 -17   1   12.20    1.20
   4 -17   1   10.80    3.10
  -5  17  -1    3.50    1.20
  -5  17  -1    0.90    2.70
  -5  17  -1    4.90    1.40
   5 -17   1    3.50    1.10
   5 -17   1    5.80    2.80
  14  16  -1   -3.90    2.70
  14  16  -1    2.00    3.30
  14  16  -1   -1.70    2.70
  14  16  -1    0.80    2.90
  14  16  -1    4.60    3.40
 -14 -16   1   -0.90    2.60
  13  16  -1    4.20    3.20
  13  16  -1    0.50    2.40
  13  16  -1    7.10    3.20
  13  16  -1    1.30    2.90
  13  16  -1   -0.60    3.10
 -13 -16   1   -0.90    3.10
  12  16  -1    6.80    3.00
  12  16  -1    5.30    2.80
  12  16  -1    7.30    3.20
  12  16  -1    2.80    3.10
  12  16  -1    5.90    2.90
 -12 -16   1    4.10    2.80
  11  16  -1    4.50    2.60
  11  16  -1    0.20    2.90
  11  16  -1   -0.20    2.50
  11  16  -1    1.60    2.60
  11  16  -1    0.20    2.50
 -11 -16   1   -1.10    2.50
  10  16  -1    2.00    2.90
  10  16  -1   -0.20    2.70
  10  16  -1    2.30    2.30
  10  16  -1    1.20    3.10
  10  16  -1    0.00    2.30
 -10 -16   1   -4.20    2.60
   9  16  -1    5.10    2.20
   9  16  -1    0.50    2.40
   9  16  -1    4.10    2.90
   9  16  -1    1.90    2.30
   9  16  -1    3.30    2.70
  -9 -16   1    0.00    2.70
   8  16  -1    4.30    1.80
   8  16  -1    5.40    2.00
   8  16  -1    2.50    2.80
   8  16  -1    4.00    2.50
   8  16  -1    4.20    2.40
  -8 -16   1    3.30    2.70
   7  16  -1   15.40    2.70
   7  16  -1   16.90    2.30
   7  16  -1   10.30    3.20
   7  16  -1   12.20    3.00
   7  16  -1   14.90    2.20
   7  16  -1   13.30    3.00
  -7 -16   1   13.10    3.20
   6  16  -1    3.20    2.30
   6  16  -1    1.70    1.90
   6  16  -1    1.00    1.60
   6  16  -1    1.90    2.10
   6  16  -1    1.90    1.60
   6  16  -1    5.90    2.80
  -6 -16   1   -1.90    2.80
   5  16  -1    0.00    2.00
   5  16  -1    2.90    2.70
   5  16  -1    2.80    1.60
   5  16  -1    6.50    2.40
   5  16  -1    4.40    2.70
   5  16  -1    2.00    1.50
  -5 -16   1    1.00    2.40
   4  16  -1   14.70    3.10
   4  16  -1    9.40    3.00
   4  16  -1   11.30    1.70
   4  16  -1   12.10    3.10
   4  16  -1   13.90    1.80
   4  16  -1   12.90    2.60
   4  16  -1   13.90    1.80
  -4 -16   1   14.40    3.10
   3  16  -1    2.10    1.20
   3  16  -1    3.30    1.30
   3  16  -1    2.50    2.40
   3  16  -1    1.40    2.50
   3  16  -1    4.80    2.30
   3  16  -1    6.60    2.60
  -3 -16   1    2.60    2.80
   2  16  -1   -0.40    2.50
   2  16  -1    3.00    1.10
   2  16  -1    1.50    2.40
   2  16  -1    5.40    2.60
   2  16  -1    0.30    1.10
   2  16  -1    1.60    2.10
  -2 -16   1   -1.10    2.20
   1  16  -1    0.10    2.30
   1  16  -1    0.30    0.90
   1  16  -1   -0.60    2.40
   1  16  -1   -0.80    2.20
   1  16  -1    3.20    2.50
   1  16  -1    1.70    1.00
   1  16  -1    2.50    0.90
  -1 -16   1    0.20    2.50
  -1 -16   1    0.40    0.80
   0  16  -1   10.10    2.80
   0  16  -1   11.90    1.10
   0  16  -1   16.10    3.10
   0  16  -1   10.90    2.90
   0  16  -1   13.60    3.10
   0 -16   1   12.40    1.00
   0 -16   1   16.60    3.20
  -1  16  -1   -0.10    2.50
  -1  16  -1    4.30    2.70
  -1  16  -1    0.90    2.50
  -1  16  -1    2.90    2.40
   1 -16   1    3.70    2.30
   1 -16   1    2.40    2.40
  -2  16  -1    3.60    2.40
  -2  16  -1   -1.10    2.50
  -2  16  -1    2.20    2.50
  -2  16  -1    5.40    2.60
   2 -16   1    5.20    2.40
   2 -16   1    4.70    2.40
  -3  16  -1   -1.00    0.90
  -3  16  -1   -1.30    2.40
  -3  16  -1    0.30    2.30
   3 -16   1   -0.40    2.10
   3 -16   1   -1.00    0.70
  -4  16  -1    1.20    2.50
  -4  16  -1   -0.90    1.00
  -4  16  -1    3.90    2.80
  -4  16  -1   -0.20    1.00
   4 -16   1    1.00    2.20
   4 -16   1    1.20    0.90
  -5  16  -1    0.90    2.80
  -5  16  -1    1.20    1.30
  -5  16  -1    3.40    1.20
  -5  16  -1    2.60    2.50
   5 -16   1   -0.60    1.90
   5 -16   1    2.90    1.10
  -6  16  -1    1.90    2.70
  -6  16  -1    6.90    1.60
  -6  16  -1    2.30    1.40
   6 -16   1    3.10    2.80
   6 -16   1    3.40    1.30
  15  15  -1   -3.40    2.70
  15  15  -1    2.40    3.00
  15  15  -1    3.90    3.50
  15  15  -1    0.20    3.10
  15  15  -1   -3.20    2.70
 -15 -15   1   -2.00    3.10
  14  15  -1    4.20    3.00
  14  15  -1    0.70    2.80
  14  15  -1   -0.40    3.00
  14  15  -1   -2.20    3.30
  14  15  -1   -4.00    2.80
 -14 -15   1   -1.70    3.00
  13  15  -1    3.30    2.80
  13  15  -1   -0.50    2.80
  13  15  -1    0.50    2.40
  13  15  -1    4.00    3.00
  13  15  -1   -1.80    2.90
 -13 -15   1    2.90    3.10
  12  15  -1    2.30    2.80
  12  15  -1    7.00    3.20
  12  15  -1   -0.70    2.60
  12  15  -1    0.00    2.80
  12  15  -1    3.40    2.70
 -12 -15   1    3.50    3.00
  11  15  -1   -2.20    2.20
  11  15  -1   -2.90    2.80
  11  15  -1   -0.70    2.70
  11  15  -1   -0.20    2.50
  11  15  -1    1.40    2.80
 -11 -15   1    1.30    2.80
  10  15  -1    7.10    2.50
  10  15  -1    3.40    3.00
  10  15  -1   11.60    2.70
  10  15  -1    6.70    3.00
  10  15  -1    9.20    3.00
 -10 -15   1    6.30    3.00
   9  15  -1    5.80    2.20
   9  15  -1    1.40    2.40
   9  15  -1    4.30    2.90
   9  15  -1    3.40    2.70
   9  15  -1    3.00    2.30
  -9 -15   1    2.50    2.80
   8  15  -1    9.20    3.00
   8  15  -1   13.90    2.90
   8  15  -1   11.60    2.50
   8  15  -1   12.30    2.60
   8  15  -1   11.20    2.10
   8  15  -1   11.90    3.20
  -8 -15   1   10.20    3.00
   7  15  -1   15.50    2.90
   7  15  -1   22.80    2.50
   7  15  -1   22.60    3.00
   7  15  -1   20.70    3.30
   7  15  -1   17.80    3.50
   7  15  -1   18.90    2.30
  -7 -15   1   18.20    3.00
   6  15  -1    5.70    2.20
   6  15  -1    2.50    1.90
   6  15  -1    4.70    1.60
   6  15  -1    8.20    2.90
   6  15  -1    7.60    2.60
   6  15  -1    8.10    1.80
  -6 -15   1    5.50    2.50
   5  15  -1    2.00    1.50
   5  15  -1    2.50    2.10
   5  15  -1    3.10    2.20
   5  15  -1    7.90    2.40
   5  15  -1    3.50    1.50
   5  15  -1    2.90    2.50
  -5 -15   1    5.20    2.80
   4  15  -1   26.30    3.50
   4  15  -1   21.60    3.30
   4  15  -1   27.10    3.10
   4  15  -1   32.00    2.40
   4  15  -1   27.20    2.20
   4  15  -1   28.90    3.70
  -4 -15   1   26.50    3.80
   3  15  -1    1.70    2.10
   3  15  -1    0.40    2.30
   3  15  -1    0.50    1.80
   3  15  -1    2.20    2.40
   3  15  -1    0.00    1.10
   3  15  -1   -0.30    1.10
   3  15  -1    0.10    1.10
  -3 -15   1    1.50    2.10
   2  15  -1    0.60    2.40
   2  15  -1    3.10    2.20
   2  15  -1    0.10    1.00
   2  15  -1    2.00    1.00
   2  15  -1    4.60    1.10
   2  15  -1    3.80    2.60
   2  15  -1    1.70    1.10
   2  15  -1    2.90    2.40
  -2 -15   1    0.80    0.90
  -2 -15   1    0.50    2.10
   1  15  -1    1.80    2.10
   1  15  -1    1.20    2.40
   1  15  -1    2.20    0.90
   1  15  -1    3.50    2.40
   1  15  -1    1.60    0.80
   1  15  -1    2.20    2.40
   1  15  -1    3.00    1.00
  -1 -15   1    0.70    0.80
  -1 -15   1   -1.60    2.20
   0  15  -1   28.70    1.80
   0  15  -1   29.00    3.60
   0  15  -1   34.20    1.80
   0  15  -1   35.40    3.80
   0  15  -1   27.70    3.50
   0  15  -1   28.70    3.50
   0 -15   1   29.30    1.60
   0 -15   1   37.60    3.90
  -1  15  -1    9.20    2.70
  -1  15  -1   14.20    2.90
  -1  15  -1   15.70    2.90
  -1  15  -1   11.80    2.90
   1 -15   1   13.50    1.00
   1 -15   1   12.60    2.60
   1 -15   1   16.40    3.00
  -2  15  -1    2.30    0.80
  -2  15  -1    0.70    2.40
  -2  15  -1    1.20    2.40
  -2  15  -1    1.60    2.20
  -2  15  -1    1.60    2.50
   2 -15   1    1.10    0.60
   2 -15   1    1.50    2.00
   2 -15   1    0.40    2.10
  -3  15  -1   -1.10    2.10
  -3  15  -1    2.00    2.10
  -3  15  -1    0.60    0.80
  -3  15  -1    0.40    0.90
  -3  15  -1   -2.00    2.10
  -3  15  -1    3.00    2.80
   3 -15   1   -0.70    0.70
   3 -15   1   -0.50    2.00
   3 -15   1   -3.20    1.80
  -4  15  -1    6.50    1.10
  -4  15  -1    6.70    1.20
  -4  15  -1    5.00    2.70
  -4  15  -1    9.60    2.70
   4 -15   1    6.10    1.00
   4 -15   1    6.70    2.50
  -5  15  -1    6.00    2.90
  -5  15  -1   -1.30    1.20
  -5  15  -1    0.20    1.10
  -5  15  -1    0.90    2.40
   5 -15   1   -1.20    1.00
   5 -15   1   -0.80    1.90
  -6  15  -1    1.10    2.50
  -6  15  -1   -1.00    1.30
  -6  15  -1   -1.40    1.30
   6 -15   1    0.50    1.10
   6 -15   1    2.10    2.40
  -7  15  -1    0.30    2.60
  -7  15  -1    2.50    1.60
  -7  15  -1    0.20    1.50
   7 -15   1    1.30    1.30
   7 -15   1    3.90    2.80
  15  14  -1    0.80    2.80
  15  14  -1   -3.50    2.60
  15  14  -1   -3.10    3.10
  15  14  -1    3.70    3.10
  15  14  -1   -3.60    2.90
 -15 -14   1    0.40    3.00
  14  14  -1   -1.30    2.90
  14  14  -1    3.00    2.80
  14  14  -1    0.10    2.70
  14  14  -1   -3.20    2.40
  14  14  -1    0.40    3.10
 -14 -14   1   -0.60    2.80
  13  14  -1   -3.60    2.70
  13  14  -1   -0.10    2.50
  13  14  -1    0.20    2.80
  13  14  -1    0.90    3.00
  13  14  -1   -2.60    2.60
 -13 -14   1   -1.40    2.70
  12  14  -1   -4.30    2.50
  12  14  -1    2.00    2.60
  12  14  -1   -3.90    2.50
  12  14  -1   -2.00    2.70
  12  14  -1   -0.20    2.50
 -12 -14   1   -1.70    2.50
  11  14  -1   11.80    3.10
  11  14  -1   18.20    3.10
  11  14  -1   15.30    3.30
  11  14  -1   18.20    3.20
  11  14  -1   19.50    3.60
 -11 -14   1   19.00    3.60
  10  14  -1   15.80    3.20
  10  14  -1   16.20    3.30
  10  14  -1   14.10    3.30
  10  14  -1   23.80    3.10
  10  14  -1   15.90    3.00
  10  14  -1   21.70    3.10
 -10 -14   1   14.60    3.30
   9  14  -1   -4.50    2.40
   9  14  -1   -1.10    2.40
   9  14  -1   -1.80    1.90
   9  14  -1   -0.10    2.50
   9  14  -1   -0.60    2.10
   9  14  -1   -2.50    2.00
  -9 -14   1    0.00    2.60
   8  14  -1   12.70    2.70
   8  14  -1   15.40    2.30
   8  14  -1   11.70    2.70
   8  14  -1   15.40    3.10
   8  14  -1   12.30    2.80
   8  14  -1   15.30    2.50
  -8 -14   1   14.20    3.10
   7  14  -1   81.19    4.20
   7  14  -1   71.39    5.20
   7  14  -1   63.69    4.80
   7  14  -1   63.09    5.30
   7  14  -1   81.59    4.40
   7  14  -1   75.79    5.10
  -7 -14   1   70.79    4.80
   6  14  -1  242.98   11.40
   6  14  -1  235.78   10.80
   6  14  -1  244.78    9.40
   6  14  -1  250.07   11.00
   6  14  -1  233.78   10.50
   6  14  -1  249.28    9.60
  -6 -14   1  238.98   11.00
   5  14  -1   14.50    2.40
   5  14  -1   10.60    1.70
   5  14  -1   16.10    2.90
   5  14  -1   14.50    1.90
   5  14  -1   16.90    2.70
   5  14  -1   12.80    2.90
  -5 -14   1   11.70    2.70
   4  14  -1    1.90    2.30
   4  14  -1    1.80    2.10
   4  14  -1    0.40    1.30
   4  14  -1    0.40    2.20
   4  14  -1    0.10    1.20
   4  14  -1    1.70    2.00
  -4 -14   1    1.40    2.10
   3  14  -1   14.30    1.70
   3  14  -1   16.80    1.60
   3  14  -1   19.70    3.10
   3  14  -1   13.80    2.50
   3  14  -1   16.20    3.00
   3  14  -1   12.10    2.70
   3  14  -1   14.40    1.50
   3  14  -1   18.50    1.60
  -3 -14   1   15.00    1.50
  -3 -14   1   15.50    3.00
   2  14  -1    8.00    2.50
   2  14  -1    6.50    1.20
   2  14  -1    7.00    1.20
   2  14  -1    7.80    1.10
   2  14  -1    7.10    1.10
   2  14  -1    6.30    1.20
   2  14  -1    5.20    2.50
   2  14  -1    7.70    2.30
   2  14  -1    6.80    2.60
  -2 -14   1    6.50    1.10
  -2 -14   1    7.20    2.60
   1  14  -1    2.90    2.30
   1  14  -1    8.30    1.10
   1  14  -1    8.90    2.50
   1  14  -1    7.30    1.10
   1  14  -1    6.10    2.30
   1  14  -1    5.00    2.20
  -1 -14   1    5.20    2.20
  -1 -14   1    9.00    1.00
   0  14  -1   19.00    1.40
   0  14  -1   16.90    2.90
   0  14  -1   18.20    2.90
   0  14  -1   16.40    2.90
   0  14  -1   17.00    1.40
   0  14  -1   20.80    3.10
   0 -14   1   18.50    3.00
   0 -14   1   16.30    1.20
  -1  14  -1   18.50    3.10
  -1  14  -1   18.90    2.90
  -1  14  -1   19.70    1.30
  -1  14  -1   14.40    2.80
  -1  14  -1   17.10    2.90
   1 -14   1   15.20    1.10
   1 -14   1   14.90    2.80
  -2  14  -1    4.80    0.90
  -2  14  -1    5.70    2.70
  -2  14  -1    2.20    2.30
  -2  14  -1    5.30    0.90
  -2  14  -1    3.20    2.30
  -2  14  -1    4.10    2.30
   2 -14   1    3.80    0.70
   2 -14   1    2.80    2.20
   2 -14   1    2.60    2.00
  -3  14  -1    6.80    2.30
  -3  14  -1    7.30    2.80
  -3  14  -1   11.90    1.10
  -3  14  -1   14.40    2.70
  -3  14  -1    8.80    1.00
  -3  14  -1   11.20    1.00
  -3  14  -1    9.20    2.60
  -3  14  -1    9.30    1.20
   3 -14   1    6.60    2.40
   3 -14   1   11.40    2.50
   3 -14   1    9.20    1.00
  -4  14  -1    6.00    1.10
  -4  14  -1    5.50    2.60
  -4  14  -1    7.50    1.10
  -4  14  -1    5.80    2.20
   4 -14   1    4.60    1.00
   4 -14   1    2.40    2.20
  -5  14  -1   -1.40    2.10
  -5  14  -1    2.10    2.50
  -5  14  -1    0.40    1.10
  -5  14  -1    0.00    1.10
   5 -14   1    2.70    2.30
   5 -14   1    0.00    1.00
  -6  14  -1    3.10    2.50
  -6  14  -1    0.30    1.30
  -6  14  -1    1.60    1.30
   6 -14   1    1.90    1.10
   6 -14   1   -2.10    2.20
  -7  14  -1    0.70    1.50
  -7  14  -1    3.10    2.60
  -7  14  -1    1.40    1.40
   7 -14   1   -0.90    2.40
   7 -14   1    0.50    1.30
  -8  14  -1    0.40    1.60
  -8  14  -1    0.80    1.60
  -8  14  -1    2.50    2.50
   8 -14   1    3.80    1.60
   8 -14   1    0.40    2.60
  16  13  -1   -0.40    3.20
  16  13  -1    1.20    2.70
  16  13  -1    0.60    3.60
 -16 -13   1    3.10    3.30
  15  13  -1    4.50    3.00
  15  13  -1   -2.10    3.10
  15  13  -1    3.70    3.10
  15  13  -1    0.60    2.90
  15  13  -1    0.00    2.60
 -15 -13   1   -2.40    2.50
  14  13  -1   -0.60    2.80
  14  13  -1   -1.00    2.40
  14  13  -1    1.10    2.70
  14  13  -1   -3.40    2.80
  14  13  -1    0.70    2.70
 -14 -13   1    1.40    2.70
  13  13  -1    3.70    2.60
  13  13  -1   -4.30    2.80
  13  13  -1   -1.60    2.50
  13  13  -1   -0.50    2.60
  13  13  -1    2.80    2.80
 -13 -13   1    1.50    2.70
  12  13  -1   -2.40    2.30
  12  13  -1    1.90    2.60
  12  13  -1    0.90    2.30
  12  13  -1    1.90    2.60
  12  13  -1    2.10    2.70
 -12 -13   1   -1.60    2.10
  11  13  -1    1.90    2.20
  11  13  -1    0.60    2.40
  11  13  -1    1.60    2.20
  11  13  -1    0.60    2.40
  11  13  -1    0.40    2.30
  11  13  -1    0.30    2.70
 -11 -13   1    4.00    2.80
  10  13  -1    2.70    2.70
  10  13  -1    9.60    2.90
  10  13  -1    7.00    2.90
  10  13  -1    5.50    2.40
  10  13  -1    6.40    2.40
  10  13  -1    7.10    2.50
 -10 -13   1    8.20    2.60
   9  13  -1   32.20    4.00
   9  13  -1   37.70    3.50
   9  13  -1   34.90    3.40
   9  13  -1   37.30    3.90
   9  13  -1   39.10    3.60
   9  13  -1   33.70    3.70
  -9 -13   1   35.20    3.80
   8  13  -1  191.78    9.80
   8  13  -1  202.78    8.70
   8  13  -1  201.68    9.20
   8  13  -1  214.08    9.50
   8  13  -1  201.78    9.70
   8  13  -1  200.28    8.50
  -8 -13   1  191.68    9.50
   7  13  -1    2.80    2.50
   7  13  -1    4.80    2.40
   7  13  -1    9.60    1.90
   7  13  -1    4.40    2.10
   7  13  -1    2.20    2.50
   7  13  -1    3.70    1.90
  -7 -13   1    6.20    2.20
   6  13  -1  150.58    7.30
   6  13  -1  154.08    6.40
   6  13  -1  149.88    7.50
   6  13  -1  154.68    7.60
   6  13  -1  156.38    7.90
   6  13  -1  156.48    6.60
  -6 -13   1  147.19    7.60
   5  13  -1   13.10    2.80
   5  13  -1    8.00    2.10
   5  13  -1    9.60    1.70
   5  13  -1    9.40    1.60
   5  13  -1   11.80    2.30
   5  13  -1   11.00    2.30
  -5 -13   1    8.70    2.60
   4  13  -1   12.30    1.70
   4  13  -1   12.10    2.70
   4  13  -1   12.70    1.60
   4  13  -1   13.40    2.70
   4  13  -1   12.70    1.60
   4  13  -1   14.90    2.70
   4  13  -1   15.40    2.30
  -4 -13   1   17.70    2.90
   3  13  -1   11.60    1.30
   3  13  -1   10.30    1.40
   3  13  -1   13.30    2.50
   3  13  -1   11.10    1.40
   3  13  -1   11.80    2.30
   3  13  -1   12.20    2.60
   3  13  -1   13.00    1.40
   3  13  -1   12.40    2.60
  -3 -13   1   13.90    1.40
  -3 -13   1   14.30    2.80
   2  13  -1   18.00    1.50
   2  13  -1   18.40    1.50
   2  13  -1   20.00    2.80
   2  13  -1   18.80    2.80
   2  13  -1   14.70    2.40
   2  13  -1   17.70    1.40
   2  13  -1   18.00    1.30
   2  13  -1   20.30    2.90
  -2 -13   1   16.10    2.80
  -2 -13   1   17.30    1.40
   1  13  -1    6.00    1.00
   1  13  -1    7.70    1.00
   1  13  -1    9.10    2.40
   1  13  -1    6.40    2.20
   1  13  -1    4.30    2.00
   1  13  -1    2.00    2.10
  -1 -13   1    6.50    0.90
  -1 -13   1    3.50    2.20
   0  13  -1   16.80    1.40
   0  13  -1   16.40    2.60
   0  13  -1   17.10    1.40
   0  13  -1   16.70    2.80
   0  13  -1   14.40    2.60
   0  13  -1   18.00    2.90
   0 -13   1   16.80    1.20
   0 -13   1   18.70    2.80
  -1  13  -1   32.20    3.60
  -1  13  -1   35.00    3.70
  -1  13  -1   35.40    3.40
  -1  13  -1   33.00    1.70
  -1  13  -1   39.90    3.60
  -1  13  -1   38.10    1.80
   1 -13   1   35.20    1.70
   1 -13   1   35.90    3.40
  -2  13  -1   19.00    3.10
  -2  13  -1   19.90    1.40
  -2  13  -1   20.70    2.80
  -2  13  -1   22.10    3.20
  -2  13  -1   20.50    1.40
  -2  13  -1   17.50    2.70
   2 -13   1   14.30    2.60
   2 -13   1   19.50    1.30
   2 -13   1   17.00    2.80
  -3  13  -1   52.89    2.50
  -3  13  -1   49.70    3.90
  -3  13  -1   57.59    4.70
  -3  13  -1   53.29    4.00
  -3  13  -1   52.19    4.50
  -3  13  -1   49.90    2.40
   3 -13   1   52.59    2.40
   3 -13   1   49.60    4.00
   3 -13   1   52.59    4.10
  -4  13  -1    2.10    1.90
  -4  13  -1    0.50    2.40
  -4  13  -1    0.70    0.90
  -4  13  -1   -0.20    0.90
  -4  13  -1   -0.40    0.90
  -4  13  -1   -0.80    2.00
   4 -13   1    0.50    1.70
   4 -13   1    0.00    1.70
   4 -13   1   -1.00    1.80
   4 -13   1    0.80    0.90
  -5  13  -1    0.10    2.10
  -5  13  -1    0.90    1.10
  -5  13  -1    0.20    2.40
  -5  13  -1    0.50    1.10
   5 -13   1    0.60    1.00
   5 -13   1   -1.10    2.00
  -6  13  -1   -0.20    1.20
  -6  13  -1    0.40    1.20
  -6  13  -1   -1.00    2.10
   6 -13   1   -2.70    1.60
   6 -13   1   -0.90    1.10
  -7  13  -1   -1.10    2.20
  -7  13  -1   -1.30    1.30
  -7  13  -1    1.70    1.40
   7 -13   1   -0.50    2.00
   7 -13   1    0.60    1.30
  -8  13  -1   -0.10    1.50
  -8  13  -1   -1.20    2.10
  -8  13  -1   -0.80    1.50
   8 -13   1    1.00    1.50
   8 -13   1   -2.70    2.30
  -9  13  -1    0.00    2.70
  -9  13  -1    1.00    1.80
  -9  13  -1    1.10    1.80
   9 -13   1    0.30    1.60
   9 -13   1   -2.10    2.60
  16  12  -1    2.60    3.60
  15  12  -1    4.70    3.10
  15  12  -1   -3.10    2.40
  15  12  -1   -4.20    2.80
  15  12  -1    1.10    2.50
  15  12  -1   -2.90    3.10
 -15 -12   1    2.50    2.80
  14  12  -1    4.40    2.70
  14  12  -1    1.90    3.10
  14  12  -1    3.50    2.80
  14  12  -1    1.10    2.50
  14  12  -1    5.20    3.00
 -14 -12   1    5.60    2.70
  13  12  -1    6.20    2.70
  13  12  -1    4.80    2.60
  13  12  -1    8.30    3.20
  13  12  -1   -0.10    2.80
  13  12  -1    6.10    2.80
  13  12  -1    1.60    2.50
 -13 -12   1    8.30    2.80
  12  12  -1   21.00    3.60
  12  12  -1   13.60    3.10
  12  12  -1   17.00    3.30
  12  12  -1   17.20    3.10
  12  12  -1   14.80    2.80
  12  12  -1   21.20    3.30
 -12 -12   1   17.10    3.30
  11  12  -1    3.40    2.40
  11  12  -1    2.60    2.40
  11  12  -1    0.00    2.40
  11  12  -1    4.00    2.30
  11  12  -1   -0.60    2.30
  11  12  -1    6.30    2.90
 -11 -12   1    1.60    2.70
  10  12  -1    5.60    2.80
  10  12  -1   10.20    2.60
  10  12  -1   10.60    2.50
  10  12  -1    7.80    2.40
  10  12  -1    7.10    2.50
  10  12  -1    8.80    2.80
 -10 -12   1    5.80    2.50
   9  12  -1  168.38    8.50
   9  12  -1  171.38    8.20
   9  12  -1  177.08    8.40
   9  12  -1  179.58    7.70
   9  12  -1  165.38    8.50
   9  12  -1  163.28    7.80
  -9 -12   1  168.98    8.30
   8  12  -1   29.80    3.70
   8  12  -1   31.30    3.50
   8  12  -1   33.90    3.00
   8  12  -1   34.70    3.10
   8  12  -1   31.80    3.30
   8  12  -1   27.40    3.50
  -8 -12   1   30.20    3.40
   7  12  -1  200.68    9.70
   7  12  -1  205.38    8.20
   7  12  -1  210.88    9.50
   7  12  -1  203.68    9.00
   7  12  -1  205.88    9.40
   7  12  -1  192.78    8.30
  -7 -12   1  207.28    9.20
   6  12  -1   31.40    2.40
   6  12  -1   32.10    2.60
   6  12  -1   34.00    3.30
   6  12  -1   33.60    3.50
   6  12  -1   35.90    3.30
   6  12  -1   32.20    3.20
  -6 -12   1   34.40    3.40
   5  12  -1   95.19    5.20
   5  12  -1   92.19    5.60
   5  12  -1  106.19    4.70
   5  12  -1   91.69    4.30
  -5 -12   1   98.09    5.60
   4  12  -1    2.90    1.20
   4  12  -1    3.50    1.10
   4  12  -1    0.00    1.60
   4  12  -1    1.10    2.00
   4  12  -1    3.20    1.80
   4  12  -1    2.30    1.90
   4  12  -1    2.40    1.00
   4  12  -1    2.20    1.10
  -4 -12   1    1.10    1.80
  -4 -12   1    1.40    1.00
   3  12  -1   10.00    2.30
   3  12  -1   10.40    1.30
   3  12  -1    9.60    1.20
   3  12  -1    9.20    1.10
   3  12  -1    8.70    2.10
   3  12  -1    9.40    2.30
   3  12  -1   10.50    2.40
   3  12  -1    9.80    1.30
  -3 -12   1    9.00    1.20
  -3 -12   1    6.70    2.00
   2  12  -1   19.80    1.50
   2  12  -1   16.80    2.40
   2  12  -1   21.40    1.40
   2  12  -1   18.90    1.30
   2  12  -1   19.70    1.60
   2  12  -1   17.80    2.60
   2  12  -1   17.50    2.40
   2  12  -1   15.50    2.60
  -2 -12   1   18.00    1.50
  -2 -12   1   15.70    2.40
   1  12  -1   32.20    3.30
   1  12  -1   31.40    3.00
   1  12  -1   36.10    1.90
   1  12  -1   30.50    1.80
   1  12  -1   27.90    3.00
   1  12  -1   33.80    3.30
  -1 -12   1   35.30    3.40
  -1 -12   1   34.50    1.70
   0  12  -1    1.90    0.70
   0  12  -1   -0.60    1.80
   0  12  -1    2.30    0.70
   0  12  -1   -0.40    1.60
   0  12  -1    2.90    1.90
   0  12  -1   -0.80    1.90
   0 -12   1    0.50    0.60
   0 -12   1    0.30    1.50
  -1  12  -1    1.50    1.90
  -1  12  -1   -2.30    1.70
  -1  12  -1    0.60    0.60
  -1  12  -1    0.70    1.80
  -1  12  -1    1.00    2.00
  -1  12  -1   -0.60    0.60
   1 -12   1   -1.60    1.60
  -2  12  -1    0.40    2.10
  -2  12  -1    3.20    1.80
  -2  12  -1    2.60    1.90
  -2  12  -1    5.40    2.10
  -2  12  -1    2.90    0.80
  -2  12  -1    3.40    0.80
   2 -12   1    2.60    1.90
   2 -12   1   -0.30    1.50
   2 -12   1    1.70    0.60
  -3  12  -1    0.90    1.80
  -3  12  -1    1.70    1.80
  -3  12  -1   -0.60    1.80
  -3  12  -1   -0.80    1.70
  -3  12  -1    0.20    0.80
  -3  12  -1    1.20    0.80
   3 -12   1   -0.30    1.80
   3 -12   1   -0.20    0.70
   3 -12   1   -2.40    1.50
  -4  12  -1    6.50    1.10
  -4  12  -1   10.20    1.20
  -4  12  -1    9.60    2.70
  -4  12  -1    8.40    1.20
  -4  12  -1    6.30    2.50
  -4  12  -1    6.70    2.10
  -4  12  -1    8.50    1.20
   4 -12   1    6.20    2.00
   4 -12   1    9.60    2.30
   4 -12   1    6.50    2.30
   4 -12   1    6.40    1.10
  -5  12  -1    1.10    2.20
  -5  12  -1   -0.20    2.30
  -5  12  -1    1.60    1.10
  -5  12  -1    1.50    1.10
   5 -12   1    2.40    1.10
   5 -12   1   -1.80    1.90
  -6  12  -1   11.20    1.50
  -6  12  -1   10.60    1.50
  -6  12  -1    9.30    2.50
   6 -12   1   11.30    1.50
   6 -12   1    9.40    2.50
  -7  12  -1   20.00    3.30
  -7  12  -1   17.00    2.00
  -7  12  -1   16.50    1.90
   7 -12   1   18.10    2.00
   7 -12   1   17.60    3.30
  -8  12  -1    0.00    1.40
  -8  12  -1   -3.90    2.20
  -8  12  -1    1.90    1.50
   8 -12   1   -0.10    2.00
   8 -12   1    1.30    1.40
  -9  12  -1    2.00    1.60
  -9  12  -1    0.60    1.60
  -9  12  -1    1.90    2.30
   9 -12   1    2.10    1.60
   9 -12   1    0.50    2.50
 -10  12  -1    1.40    1.80
 -10  12  -1    2.90    1.80
  10 -12   1    6.50    1.90
  10 -12   1    4.20    3.00
  17  11  -1   -1.90    4.10
  16  11  -1    6.00    3.70
  15  11  -1   -3.00    3.20
  15  11  -1   -1.20    2.20
  15  11  -1   -2.60    2.60
  15  11  -1    2.10    2.70
  15  11  -1    3.70    3.10
 -15 -11   1    3.70    2.50
  14  11  -1    4.80    2.80
  14  11  -1   -1.90    2.20
  14  11  -1    1.90    3.10
  14  11  -1   -2.10    2.90
  14  11  -1    0.30    2.60
  14  11  -1   -3.80    2.80
 -14 -11   1   -1.10    2.30
  13  11  -1    3.70    2.60
  13  11  -1    2.10    2.50
  13  11  -1    1.90    2.30
  13  11  -1    6.10    2.70
  13  11  -1    4.10    2.80
  13  11  -1    3.30    3.00
 -13 -11   1    4.30    2.60
  12  11  -1   -0.10    2.70
  12  11  -1    0.00    2.30
  12  11  -1   -4.00    2.20
  12  11  -1   -2.60    2.20
  12  11  -1    0.00    2.30
  12  11  -1    0.20    2.20
 -12 -11   1    1.10    2.40
  11  11  -1   -1.70    2.20
  11  11  -1    0.70    2.20
  11  11  -1    2.00    2.00
  11  11  -1    1.00    2.10
  11  11  -1    0.40    2.30
  11  11  -1   -0.30    2.50
 -11 -11   1    0.50    2.00
  10  11  -1    9.60    2.40
  10  11  -1    7.90    2.90
  10  11  -1    7.20    2.50
  10  11  -1    8.60    2.40
  10  11  -1    8.80    2.30
  10  11  -1    8.20    2.30
 -10 -11   1    8.30    2.40
   9  11  -1    2.90    2.20
   9  11  -1    3.00    2.00
   9  11  -1    2.90    2.10
   9  11  -1    7.70    2.70
   9  11  -1    3.40    2.30
   9  11  -1    7.20    2.10
  -9 -11   1    8.70    2.50
   8  11  -1    9.20    2.10
   8  11  -1   12.40    2.30
   8  11  -1   14.20    2.40
   8  11  -1   11.40    2.70
   8  11  -1   11.40    2.10
   8  11  -1   16.10    2.80
  -8 -11   1   13.30    2.40
   7  11  -1    6.30    2.40
   7  11  -1    9.20    2.00
   7  11  -1    7.20    1.70
   7  11  -1    9.80    2.40
   7  11  -1    7.70    1.80
   7  11  -1   12.80    2.30
  -7 -11   1    9.10    2.40
  -7 -11   1    9.20    1.30
   6  11  -1   22.10    2.90
   6  11  -1   25.20    2.90
   6  11  -1   22.60    2.20
   6  11  -1   22.90    2.70
   6  11  -1   25.80    2.70
   5  11  -1   -0.70    0.70
   5  11  -1    2.00    1.10
   5  11  -1   -0.20    1.80
   5  11  -1   -1.00    0.80
   5  11  -1    0.70    1.00
   5  11  -1    0.10    0.50
   5  11  -1    0.40    0.90
   5  11  -1    1.40    1.70
  -5 -11   1   -0.50    1.10
  -5 -11   1    2.10    1.10
   4  11  -1   -0.50    1.80
   4  11  -1   -0.70    0.80
   4  11  -1    0.00    1.20
   4  11  -1   -0.80    0.90
   4  11  -1   -0.20    1.20
   4  11  -1   -0.70    0.90
   4  11  -1    0.30    0.90
   4  11  -1   -0.40    1.40
  -4 -11   1    0.50    0.90
  -4 -11   1   -1.00    1.60
   3  11  -1   44.00    2.20
   3  11  -1   43.90    3.30
   3  11  -1   40.90    3.40
   3  11  -1   41.40    3.50
   3  11  -1   41.50    2.30
   3  11  -1   38.50    3.10
  -3 -11   1   37.20    3.30
  -3 -11   1   42.50    2.20
   2  11  -1    4.80    0.80
   2  11  -1    5.90    1.00
   2  11  -1    5.10    0.80
   2  11  -1    3.00    1.60
   2  11  -1    6.00    2.00
   2  11  -1    3.50    1.90
   2  11  -1    4.60    1.00
   2  11  -1    4.30    1.90
  -2 -11   1    4.60    0.90
  -2 -11   1    4.30    2.00
   1  11  -1   74.79    4.60
   1  11  -1   81.69    4.50
   1  11  -1   67.69    4.30
   1  11  -1   75.09    4.30
   1  11  -1   74.89    3.10
   1  11  -1   79.29    3.10
  -1 -11   1   72.19    4.30
  -1 -11   1   75.99    3.00
   0  11  -1    1.80    1.90
   0  11  -1    0.00    1.70
   0  11  -1    1.80    0.70
   0  11  -1    1.20    0.60
   0  11  -1    2.00    1.60
   0  11  -1    0.50    1.60
   0 -11   1    1.80    1.70
  -1  11  -1    0.10    1.70
  -1  11  -1   -1.10    1.70
  -1  11  -1    1.00    0.60
  -1  11  -1    2.20    1.80
  -1  11  -1   -2.40    1.50
   1 -11   1    2.30    1.60
  -2  11  -1  208.28    7.30
  -2  11  -1  222.68    9.70
  -2  11  -1  197.88    9.40
  -2  11  -1  211.28    9.00
  -2  11  -1  199.08    8.60
  -2  11  -1  200.28    7.30
   2 -11   1  205.78    8.80
   2 -11   1  205.98    7.30
  -3  11  -1  171.48    7.40
  -3  11  -1  161.08    7.40
  -3  11  -1  161.38    8.20
  -3  11  -1  153.68    8.00
  -3  11  -1  164.08    6.10
  -3  11  -1  170.28    6.10
   3 -11   1  163.58    7.50
   3 -11   1  177.68    8.30
   3 -11   1  163.38    6.10
  -4  11  -1   16.40    1.40
  -4  11  -1   16.40    2.30
  -4  11  -1   14.20    2.70
  -4  11  -1   19.60    1.50
  -4  11  -1   17.80    1.40
  -4  11  -1   14.50    1.30
  -4  11  -1   16.40    2.60
   4 -11   1   14.40    1.30
   4 -11   1   16.40    2.40
   4 -11   1   16.00    2.30
   4 -11   1   16.00    2.50
  -5  11  -1   91.09    4.70
  -5  11  -1   83.69    3.80
  -5  11  -1   91.59    3.90
  -5  11  -1   86.69    5.60
  -5  11  -1   86.49    3.70
  -5  11  -1   82.09    5.60
   5 -11   1   83.49    3.80
   5 -11   1   88.99    4.80
   5 -11   1   78.09    5.40
  -6  11  -1   -1.50    1.90
  -6  11  -1   -1.50    1.10
  -6  11  -1    1.20    1.10
   6 -11   1   -0.30    1.80
   6 -11   1    0.20    1.20
  -7  11  -1   12.70    2.80
  -7  11  -1   10.10    1.60
  -7  11  -1    8.10    1.50
   7 -11   1   11.70    2.90
   7 -11   1    9.80    1.60
  -8  11  -1    1.10    1.40
  -8  11  -1   -1.30    1.90
  -8  11  -1   -0.80    1.30
   8 -11   1   -1.00    2.40
   8 -11   1    2.80    1.40
  -9  11  -1   22.50    2.30
  -9  11  -1   26.70    3.80
  -9  11  -1   23.50    2.40
   9 -11   1   18.90    3.60
   9 -11   1   18.20    2.20
 -10  11  -1    1.90    1.50
 -10  11  -1   -0.30    1.50
  10 -11   1   -0.40    1.40
  10 -11   1    1.70    2.30
 -11  11  -1    2.80    1.80
 -11  11  -1    3.70    1.80
  11 -11   1    2.80    1.80
  11 -11   1    1.50    2.90
  17  10  -1   -1.30    4.10
  16  10  -1    1.00    3.70
  15  10  -1    2.80    3.00
  15  10  -1    7.60    3.80
  14  10  -1   10.10    2.70
  14  10  -1    5.20    3.30
  14  10  -1    4.00    2.90
  14  10  -1    5.00    2.40
  14  10  -1    7.10    2.80
  14  10  -1    9.00    3.50
 -14 -10   1    5.10    2.50
  13  10  -1    1.10    2.90
  13  10  -1   -0.80    2.00
  13  10  -1    2.30    2.90
  13  10  -1   -1.70    2.30
  13  10  -1    0.60    2.60
  13  10  -1    1.20    2.10
 -13 -10   1    2.10    2.50
  12  10  -1    2.00    2.20
  12  10  -1    0.30    2.50
  12  10  -1    3.60    2.60
  12  10  -1   -1.20    2.30
  12  10  -1    8.60    3.10
  12  10  -1   -0.20    2.20
 -12 -10   1    1.70    2.20
  11  10  -1    2.30    1.90
  11  10  -1    1.30    2.60
  11  10  -1    1.10    2.20
  11  10  -1    4.10    2.20
  11  10  -1    0.90    2.00
  11  10  -1    1.10    2.40
 -11 -10   1    2.20    1.90
  10  10  -1   45.10    4.00
  10  10  -1   41.40    3.50
  10  10  -1   52.09    4.50
  10  10  -1   49.99    4.10
  10  10  -1   50.89    4.00
  10  10  -1   53.49    4.10
 -10 -10   1   43.50    3.90
   9  10  -1   33.80    3.40
   9  10  -1   34.10    3.30
   9  10  -1   34.00    3.60
   9  10  -1   35.10    3.10
   9  10  -1   36.50    3.30
   9  10  -1   34.60    3.20
  -9 -10   1   32.70    3.20
   8  10  -1   -2.20    1.50
   8  10  -1   -0.70    1.60
   8  10  -1   -0.60    1.90
   8  10  -1    1.00    1.90
   8  10  -1    2.20    1.60
   8  10  -1    0.50    1.70
  -8 -10   1    3.50    1.70
   7  10  -1    2.70    2.00
   7  10  -1    3.20    2.10
   7  10  -1    1.60    1.60
   7  10  -1    4.00    2.00
   7  10  -1    4.90    1.90
   7  10  -1    5.30    1.50
  -7 -10   1    3.90    1.20
  -7 -10   1    5.30    1.80
   6  10  -1    1.10    1.00
   6  10  -1    8.00    1.60
   6  10  -1    3.70    1.20
   6  10  -1    5.00    1.90
   6  10  -1    5.60    1.80
   6  10  -1    3.40    1.30
   6  10  -1    3.90    2.00
   6  10  -1    5.00    2.00
  -6 -10   1    4.00    1.70
  -6 -10   1    3.50    0.90
   5  10  -1    6.20    1.20
   5  10  -1    5.40    1.20
   5  10  -1    6.30    1.80
   5  10  -1    0.40    1.10
   5  10  -1    1.10    0.90
   5  10  -1    6.50    2.10
   5  10  -1    0.60    1.20
  -5 -10   1    6.40    1.20
   4  10  -1   -0.60    1.70
   4  10  -1    0.60    1.40
   4  10  -1    1.60    1.10
   4  10  -1    1.00    1.00
   4  10  -1    4.30    1.00
   4  10  -1    1.80    1.10
   4  10  -1    1.30    1.00
   4  10  -1    1.80    0.80
  -4 -10   1    2.30    1.00
  -4 -10   1    0.10    1.80
   3  10  -1   32.50    2.10
   3  10  -1   35.20    2.00
   3  10  -1   30.80    1.90
   3  10  -1   32.10    3.00
   3  10  -1   33.50    1.90
   3  10  -1   32.40    3.00
   3  10  -1   31.20    2.90
   3  10  -1   33.40    2.80
  -3 -10   1   32.70    3.10
  -3 -10   1   36.20    2.00
   2  10  -1   57.09    3.60
   2  10  -1   54.79    2.30
   2  10  -1   53.39    3.80
   2  10  -1   54.29    2.60
   2  10  -1   56.29    3.80
   2  10  -1   59.29    3.80
   2  10  -1   56.89    2.30
  -2 -10   1   57.29    2.50
  -2 -10   1   55.29    3.60
   1  10  -1   31.20    1.60
   1  10  -1   23.90    2.50
   1  10  -1   28.00    2.90
   1  10  -1   27.00    1.60
   1  10  -1   27.40    2.80
   1  10  -1   32.60    2.90
  -1 -10   1   28.00    1.50
  -1 -10   1   28.30    2.80
   0  10  -1    0.90    0.60
   0  10  -1    0.10    0.60
   0  10  -1    0.20    1.60
   0  10  -1   -0.30    1.50
   0  10  -1    0.60    1.50
   0  10  -1    0.00    1.30
   0 -10   1   -1.80    1.20
  -1  10  -1   18.20    2.30
  -1  10  -1   13.70    2.10
  -1  10  -1   11.90    2.20
  -1  10  -1   13.60    1.00
  -1  10  -1   16.20    2.20
  -1  10  -1   15.30    1.00
   1 -10   1   13.30    2.10
  -2  10  -1    1.60    1.60
  -2  10  -1    0.20    0.70
  -2  10  -1    0.30    1.50
  -2  10  -1    0.50    0.60
  -2  10  -1    1.70    1.70
  -2  10  -1   -2.90    1.60
   2 -10   1    1.50    0.60
   2 -10   1    1.50    1.40
  -3  10  -1    0.00    0.80
  -3  10  -1    0.90    0.70
  -3  10  -1    0.20    1.80
  -3  10  -1   -0.10    1.40
  -3  10  -1   -1.70    1.70
  -3  10  -1    0.90    1.70
   3 -10   1    0.80    0.60
   3 -10   1   -2.00    1.50
   3 -10   1    2.70    1.60
  -4  10  -1   -1.80    1.40
  -4  10  -1    1.20    0.80
  -4  10  -1    0.00    0.80
  -4  10  -1    0.40    1.60
  -4  10  -1   -0.30    1.90
  -4  10  -1   -0.80    0.80
  -4  10  -1    1.20    0.80
   4 -10   1   -0.40    1.60
   4 -10   1    0.90    1.40
   4 -10   1   -0.20    0.80
   4 -10   1   -1.80    1.30
  -5  10  -1   17.30    2.10
  -5  10  -1   22.40    1.70
  -5  10  -1   22.50    3.00
  -5  10  -1   18.00    1.60
  -5  10  -1   18.40    1.60
  -5  10  -1   21.70    3.10
  -5  10  -1   19.40    1.60
   5 -10   1   12.20    2.50
   5 -10   1   17.90    2.40
   5 -10   1   18.80    2.30
   5 -10   1   18.00    1.60
  -6  10  -1   40.50    2.60
  -6  10  -1   40.00    2.50
  -6  10  -1   37.20    3.70
   6 -10   1   38.60    3.90
   6 -10   1   42.50    2.70
  -7  10  -1    4.90    2.30
  -7  10  -1    4.80    1.30
  -7  10  -1    5.00    1.40
   7 -10   1    3.30    1.40
   7 -10   1    3.50    2.40
  -8  10  -1   21.80    2.10
  -8  10  -1   18.20    3.20
  -8  10  -1   21.40    2.10
   8 -10   1   19.60    2.10
   8 -10   1   19.40    3.40
  -9  10  -1   37.50    3.00
  -9  10  -1   30.90    4.00
  -9  10  -1   35.40    2.80
   9 -10   1   28.10    2.50
   9 -10   1   35.70    4.20
 -10  10  -1   15.10    2.20
 -10  10  -1   15.10    2.10
  10 -10   1   12.30    2.00
  10 -10   1   12.90    2.90
 -11  10  -1   11.90    2.20
 -11  10  -1   15.00    2.20
  11 -10   1   11.20    3.30
  11 -10   1    8.70    2.00
 -12  10  -1    0.00    1.90
 -12  10  -1   -0.60    1.80
  12 -10   1    5.60    2.90
  12 -10   1   -2.90    1.70
  17   9  -1   13.90    5.10
  17   9  -1   -1.60    4.10
  16   9  -1   -3.10    3.00
  16   9  -1    5.60    3.90
  15   9  -1    1.70    3.70
  15   9  -1   -2.10    3.20
  14   9  -1   35.60    4.00
  14   9  -1   33.80    3.60
  14   9  -1   30.30    4.60
  14   9  -1   32.00    3.60
  14   9  -1   28.00    4.40
  14   9  -1   32.70    4.20
 -14  -9   1   37.70    3.70
  13   9  -1    7.40    2.20
  13   9  -1    5.20    3.10
  13   9  -1    5.40    2.50
  13   9  -1    5.20    3.10
  13   9  -1    3.50    2.70
  13   9  -1    4.70    2.40
 -13  -9   1    5.40    2.30
  12   9  -1    3.80    2.50
  12   9  -1    2.80    2.70
  12   9  -1    2.10    2.90
  12   9  -1    2.70    2.40
  12   9  -1    3.70    2.00
  12   9  -1    1.20    2.20
 -12  -9   1   -1.10    2.00
  11   9  -1    3.10    2.10
  11   9  -1    2.20    2.20
  11   9  -1    4.00    2.40
  11   9  -1    3.10    2.10
  11   9  -1    1.10    2.60
  11   9  -1    6.10    2.50
 -11  -9   1    1.70    2.00
  10   9  -1   23.30    3.00
  10   9  -1   26.90    3.30
  10   9  -1   21.30    3.00
  10   9  -1   19.70    2.80
  10   9  -1   21.80    2.80
  10   9  -1   27.30    3.00
 -10  -9   1   23.70    2.90
   9   9  -1    1.40    1.90
   9   9  -1    4.40    1.80
   9   9  -1    6.30    2.00
   9   9  -1    4.80    1.90
   9   9  -1    3.60    2.00
   9   9  -1    3.90    2.00
  -9  -9   1    5.60    2.10
   8   9  -1    1.90    2.10
   8   9  -1    2.70    1.90
   8   9  -1    3.20    1.80
   8   9  -1    4.60    1.70
   8   9  -1    0.90    1.70
   8   9  -1    1.70    1.60
  -8  -9   1    3.20    1.70
   7   9  -1   90.89    4.80
   7   9  -1   92.89    4.50
   7   9  -1   98.29    4.80
   7   9  -1   90.39    5.10
   7   9  -1   98.59    5.40
   7   9  -1   91.49    5.10
  -7  -9   1   91.39    4.90
   6   9  -1    4.50    1.20
   6   9  -1    5.80    1.90
   6   9  -1    8.60    1.90
   6   9  -1    7.50    1.40
   6   9  -1    6.30    1.70
   6   9  -1    5.40    1.40
   6   9  -1    7.40    1.80
   6   9  -1    4.90    1.50
  -6  -9   1    5.60    1.90
  -6  -9   1    7.00    1.10
   5   9  -1   12.70    1.50
   5   9  -1   14.20    1.60
   5   9  -1    9.30    2.10
   5   9  -1   12.50    1.90
   5   9  -1   13.60    1.60
   5   9  -1    9.90    1.90
   5   9  -1   12.40    2.00
  -5  -9   1   11.10    1.40
  -5  -9   1   12.60    1.80
   4   9  -1    4.40    1.00
   4   9  -1    3.70    1.70
   4   9  -1    3.80    1.60
   4   9  -1    5.40    1.10
   4   9  -1    4.20    1.10
  -4  -9   1    4.20    1.30
  -4  -9   1    5.70    1.10
   3   9  -1   13.80    2.10
   3   9  -1   16.80    1.30
   3   9  -1   16.90    2.10
   3   9  -1   14.90    2.00
   3   9  -1   16.50    1.30
   3   9  -1   14.00    1.30
   3   9  -1   14.00    1.40
   3   9  -1   12.90    2.10
  -3  -9   1   18.40    1.50
  -3  -9   1   19.80    2.40
   2   9  -1    0.30    1.30
   2   9  -1   -0.90    0.70
   2   9  -1   -2.50    1.50
   2   9  -1   -0.20    0.70
   2   9  -1   -1.00    1.20
   2   9  -1    0.50    1.30
   2   9  -1    0.80    0.50
   2   9  -1   -0.30    0.60
  -2  -9   1   -0.40    1.30
  -2  -9   1   -0.40    0.70
   1   9  -1   16.80    2.10
   1   9  -1   10.50    1.80
   1   9  -1   15.30    2.20
   1   9  -1   15.40    1.20
   1   9  -1   14.20    2.10
  -1  -9   1   12.80    1.00
  -1  -9   1   14.30    2.10
   0   9  -1  162.08    7.50
   0   9  -1  158.98    7.50
   0   9  -1  161.28    5.80
   0   9  -1  164.18    7.20
   0   9  -1  174.68    5.80
   0   9  -1  162.78    7.00
   0  -9   1  167.78    7.20
  -1   9  -1   -0.30    1.40
  -1   9  -1    0.00    0.50
  -1   9  -1   -0.10    1.40
  -1   9  -1    0.80    1.40
  -1   9  -1    1.70    1.60
  -1   9  -1    0.60    0.50
   1  -9   1   -0.30    1.30
  -2   9  -1  247.28   10.70
  -2   9  -1  239.08   10.50
  -2   9  -1  233.88    8.50
  -2   9  -1  243.38    9.90
  -2   9  -1  249.68    9.60
  -2   9  -1  242.18    8.50
   2  -9   1  234.28    8.50
   2  -9   1  254.67    9.80
  -3   9  -1   47.30    3.70
  -3   9  -1   51.69    2.30
  -3   9  -1   52.99    3.30
  -3   9  -1   50.19    2.30
  -3   9  -1   48.10    3.70
  -3   9  -1   50.19    3.20
   3  -9   1   49.30    2.20
   3  -9   1   50.99    3.20
   3  -9   1   48.10    3.60
  -4   9  -1   52.49    2.60
  -4   9  -1   56.29    2.60
  -4   9  -1   54.09    4.00
  -4   9  -1   55.49    2.40
  -4   9  -1   55.39    2.50
  -4   9  -1   53.99    3.30
  -4   9  -1   52.19    3.70
   4  -9   1   53.39    3.30
   4  -9   1   55.89    2.60
   4  -9   1   59.59    4.00
   4  -9   1   47.40    3.30
  -5   9  -1   10.80    1.30
  -5   9  -1   13.50    2.40
  -5   9  -1    9.30    1.60
  -5   9  -1   11.70    1.30
  -5   9  -1    8.90    2.20
  -5   9  -1   10.50    1.30
  -5   9  -1   10.60    1.20
   5  -9   1   11.20    1.80
   5  -9   1   11.50    2.30
   5  -9   1    9.80    1.30
   5  -9   1   11.40    1.90
  -6   9  -1    2.60    1.20
  -6   9  -1    3.80    1.20
  -6   9  -1    1.30    1.90
   6  -9   1    0.50    1.20
   6  -9   1    3.00    2.10
   6  -9   1    3.90    1.60
  -7   9  -1   36.00    2.60
  -7   9  -1   36.60    2.60
  -7   9  -1   40.50    3.90
   7  -9   1   35.00    3.80
   7  -9   1   32.90    2.60
  -8   9  -1   66.69    3.50
  -8   9  -1   65.59    4.70
  -8   9  -1   64.89    3.50
   8  -9   1   59.19    3.50
   8  -9   1   52.49    4.80
  -9   9  -1    5.00    1.60
  -9   9  -1    1.50    1.30
  -9   9  -1    4.00    2.10
   9  -9   1    2.40    2.40
   9  -9   1    2.20    1.40
 -10   9  -1    2.60    1.50
 -10   9  -1    7.00    1.80
  10  -9   1    5.80    1.70
  10  -9   1    4.80    2.50
 -11   9  -1   -0.40    1.70
 -11   9  -1    2.50    1.60
  11  -9   1    0.70    1.70
  11  -9   1    1.20    2.00
 -12   9  -1    0.30    1.90
 -12   9  -1   -0.70    1.90
  12  -9   1   -2.90    2.30
  12  -9   1   -0.70    1.90
 -13   9  -1    1.10    2.20
 -13   9  -1    1.30    2.30
  13  -9   1   -1.20    2.60
  13  -9   1   -1.50    2.10
  17   8  -1    2.20    3.00
  17   8  -1    3.30    4.70
  17   8  -1    6.60    4.40
  16   8  -1   21.20    5.00
  16   8  -1   15.70    3.30
  16   8  -1   19.10    4.50
  15   8  -1   -0.10    2.20
  15   8  -1    1.70    3.40
  15   8  -1   -1.10    3.30
  14   8  -1    2.60    2.30
  14   8  -1    3.10    3.20
  14   8  -1    4.50    2.30
  14   8  -1    9.20    3.70
 -14  -8   1    1.30    2.10
  13   8  -1   37.10    3.70
  13   8  -1   21.60    3.20
  13   8  -1   23.10    3.00
  13   8  -1   49.80    5.30
  13   8  -1   34.90    4.70
  13   8  -1   23.70    3.70
  13   8  -1   25.00    2.90
 -13  -8   1   24.40    3.00
  12   8  -1    1.90    2.60
  12   8  -1   -1.60    1.50
  12   8  -1    0.10    1.90
  12   8  -1    2.30    2.40
  12   8  -1    1.20    2.90
  12   8  -1    0.00    2.20
  12   8  -1    4.00    2.00
 -12  -8   1   -1.70    1.80
  11   8  -1    9.20    2.10
  11   8  -1    8.50    2.50
  11   8  -1    8.90    2.40
  11   8  -1   12.10    2.70
  11   8  -1    7.70    2.40
  11   8  -1   10.10    2.20
  11   8  -1    6.10    1.40
 -11  -8   1   12.30    2.30
  10   8  -1   18.70    2.70
  10   8  -1   25.90    2.80
  10   8  -1   23.20    3.10
  10   8  -1   23.90    3.20
  10   8  -1   21.60    2.70
  10   8  -1   20.50    2.70
 -10  -8   1   24.90    2.80
   9   8  -1    3.90    2.30
   9   8  -1    7.40    2.00
   9   8  -1    4.10    1.80
   9   8  -1    4.90    1.90
   9   8  -1    4.00    2.00
   9   8  -1    5.00    1.90
  -9  -8   1    2.80    1.80
   8   8  -1    5.80    2.20
   8   8  -1    6.30    2.00
   8   8  -1    7.90    1.90
   8   8  -1   11.10    2.10
   8   8  -1    8.40    1.90
   8   8  -1   10.90    2.10
  -8  -8   1    9.90    1.60
  -8  -8   1   10.00    2.00
   7   8  -1    2.40    1.50
   7   8  -1    2.30    1.60
   7   8  -1    3.70    1.90
   7   8  -1    2.00    1.40
   7   8  -1    0.40    1.50
   7   8  -1    1.20    1.60
  -7  -8   1    4.80    1.80
   6   8  -1    0.70    1.40
   6   8  -1    2.10    1.10
   6   8  -1    3.70    1.80
   6   8  -1    1.60    1.20
   6   8  -1    1.20    1.30
   6   8  -1    0.30    1.40
   6   8  -1   -1.20    1.30
  -6  -8   1    1.10    0.90
  -6  -8   1    1.60    1.60
   5   8  -1    1.40    1.40
   5   8  -1    0.40    1.00
   5   8  -1    0.70    1.00
   5   8  -1    0.80    1.20
   5   8  -1    0.90    1.00
   5   8  -1    2.10    1.50
   5   8  -1    1.10    1.60
   5   8  -1   -1.70    1.50
  -5  -8   1    1.30    0.60
  -5  -8   1    1.80    1.50
   4   8  -1    4.00    1.60
   4   8  -1    4.30    1.00
   4   8  -1    5.40    1.10
   4   8  -1    4.70    1.50
   4   8  -1    6.40    1.80
   4   8  -1    5.30    1.10
   4   8  -1    4.80    1.50
   4   8  -1    5.20    0.90
  -4  -8   1    4.70    1.00
   3   8  -1    1.90    0.80
   3   8  -1    2.80    1.20
   3   8  -1    3.00    0.80
   3   8  -1    1.20    1.50
   3   8  -1    2.80    1.10
   3   8  -1    2.10    0.90
   3   8  -1    3.00    0.90
   3   8  -1    3.10    1.50
  -3  -8   1    3.40    1.60
  -3  -8   1    2.60    0.90
   2   8  -1   32.60    2.40
   2   8  -1   30.50    2.60
   2   8  -1   31.00    1.80
   2   8  -1   32.10    1.80
   2   8  -1   30.40    1.50
   2   8  -1   28.90    2.60
   2   8  -1   30.10    1.50
   2   8  -1   30.40    2.50
  -2  -8   1   30.80    2.50
  -2  -8   1   34.10    1.70
   1   8  -1    6.10    1.70
   1   8  -1    7.60    1.70
   1   8  -1    6.60    0.80
   1   8  -1    5.80    0.80
   1   8  -1    6.70    1.60
   1   8  -1    5.60    1.70
  -1  -8   1    5.90    1.70
  -1  -8   1    6.60    0.70
   0   8  -1    2.30    0.50
   0   8  -1    1.90    1.50
   0   8  -1    0.60    0.50
   0   8  -1    2.60    1.40
   0   8  -1    2.00    1.30
   0   8  -1    0.80    1.50
   0  -8   1    1.80    1.20
  -1   8  -1  330.77   12.40
  -1   8  -1  338.67   12.80
  -1   8  -1  322.67   13.60
  -1   8  -1  339.07   13.50
  -1   8  -1  314.57   11.30
   1  -8   1  333.97   12.70
  -2   8  -1   10.40    2.00
  -2   8  -1   10.80    1.70
  -2   8  -1   10.50    0.90
  -2   8  -1    9.70    1.80
  -2   8  -1   12.50    1.80
  -2   8  -1   11.80    0.90
   2  -8   1   11.30    1.70
   2  -8   1   11.30    0.90
  -3   8  -1    1.50    1.40
  -3   8  -1    2.70    0.60
  -3   8  -1    2.60    0.70
  -3   8  -1    2.70    0.60
  -3   8  -1    1.80    1.30
  -3   8  -1    4.20    1.40
  -3   8  -1    3.70    1.70
  -3   8  -1    2.30    0.80
   3  -8   1    2.50    0.70
   3  -8   1    2.90    1.40
   3  -8   1    3.10    1.60
  -4   8  -1    0.30    1.20
  -4   8  -1    1.00    1.40
  -4   8  -1    2.20    1.50
  -4   8  -1   -0.70    0.70
  -4   8  -1    1.70    0.70
  -4   8  -1    0.10    0.60
  -4   8  -1   -0.30    0.80
   4  -8   1    1.60    1.50
   4  -8   1    1.90    1.40
   4  -8   1    0.50    0.80
   4  -8   1    3.00    1.50
  -5   8  -1    3.30    0.90
  -5   8  -1    9.00    2.20
  -5   8  -1    8.10    2.00
  -5   8  -1    7.10    1.10
  -5   8  -1    7.40    1.20
   5  -8   1    5.10    1.90
   5  -8   1    8.80    1.20
   5  -8   1    8.30    1.60
   5  -8   1   10.00    1.60
  -6   8  -1    6.10    1.80
  -6   8  -1    7.70    1.30
  -6   8  -1    8.70    1.30
  -6   8  -1    7.00    1.20
  -6   8  -1    6.50    1.30
   6  -8   1    8.00    1.90
   6  -8   1   12.30    1.70
   6  -8   1    7.60    1.30
   6  -8   1   10.40    1.50
  -7   8  -1   15.90    1.70
  -7   8  -1   17.00    2.50
  -7   8  -1   18.20    1.80
   7  -8   1   13.20    2.40
   7  -8   1   13.40    1.70
  -8   8  -1   91.59    4.30
  -8   8  -1   95.99    4.40
  -8   8  -1   88.89    5.80
   8  -8   1   88.39    5.80
   8  -8   1   92.89    4.40
  -9   8  -1   -1.40    1.90
  -9   8  -1   -1.80    1.20
  -9   8  -1   -0.20    1.20
   9  -8   1    0.80    1.30
   9  -8   1    2.60    2.10
 -10   8  -1    0.50    1.60
 -10   8  -1    1.20    1.40
  10  -8   1    0.20    2.00
  10  -8   1    2.50    1.60
 -11   8  -1   -0.30    1.70
 -11   8  -1   -0.10    1.60
  11  -8   1   -0.20    2.10
  11  -8   1    1.00    1.70
 -12   8  -1    1.30    1.90
 -12   8  -1    3.40    2.00
  12  -8   1   -0.20    1.70
  12  -8   1   -1.30    1.90
 -13   8  -1   -0.70    2.10
 -13   8  -1    1.50    2.10
  13  -8   1    0.20    2.40
  13  -8   1    0.50    2.20
  17   7  -1    4.20    4.30
  17   7  -1    7.40    3.10
  17   7  -1    9.20    4.30
  16   7  -1    5.60    4.30
  16   7  -1    2.40    2.80
  16   7  -1    2.10    3.20
  15   7  -1    2.10    2.90
  15   7  -1   -1.50    2.20
  15   7  -1    3.00    3.50
  14   7  -1    7.00    2.60
  14   7  -1    4.30    3.50
  14   7  -1    2.40    3.40
  13   7  -1    1.60    1.90
  13   7  -1    6.00    2.20
  13   7  -1    2.30    3.30
  13   7  -1    1.10    1.80
  13   7  -1   -2.40    3.70
  13   7  -1    0.50    2.20
  13   7  -1    4.10    2.70
 -13  -7   1   -1.90    1.80
  12   7  -1   74.59    5.20
  12   7  -1   67.19    4.10
  12   7  -1   66.79    4.70
  12   7  -1   72.69    4.50
  12   7  -1   71.99    5.30
  12   7  -1   68.09    4.40
  12   7  -1   79.09    5.80
 -12  -7   1   65.49    4.30
  11   7  -1    5.00    2.30
  11   7  -1    6.80    2.20
  11   7  -1    4.50    2.00
  11   7  -1    7.30    2.00
  11   7  -1   16.00    3.40
  11   7  -1   13.10    2.30
  11   7  -1   14.50    3.40
 -11  -7   1    7.90    2.00
  10   7  -1   21.40    2.00
  10   7  -1   22.00    2.50
  10   7  -1   24.80    2.80
  10   7  -1   18.80    2.70
  10   7  -1   18.60    3.00
  10   7  -1   21.10    2.80
  10   7  -1   23.30    2.60
 -10  -7   1   24.80    2.60
   9   7  -1  125.69    6.40
   9   7  -1  121.69    5.90
   9   7  -1  131.49    5.90
   9   7  -1  131.59    5.70
   9   7  -1  125.89    6.00
   9   7  -1  119.99    6.40
   9   7  -1  126.89    5.70
   9   7  -1  125.29    6.10
  -9  -7   1  129.89    6.00
  -9  -7   1  125.99    5.70
  -9  -7   1  134.09    5.60
   8   7  -1   81.79    5.20
   8   7  -1   83.69    4.70
   8   7  -1   92.39    4.60
   8   7  -1   94.89    4.70
   8   7  -1   87.79    4.90
   8   7  -1   94.99    4.80
  -8  -7   1   93.09    4.10
  -8  -7   1   91.19    4.40
  -8  -7   1   84.69    4.60
   7   7  -1   43.80    3.10
   7   7  -1   46.70    3.30
   7   7  -1   49.30    3.30
   7   7  -1   44.10    3.20
   7   7  -1   45.40    3.10
   7   7  -1   46.80    3.60
  -7  -7   1   47.20    2.60
  -7  -7   1   43.80    3.20
  -7  -7   1   41.00    2.70
   6   7  -1   32.70    2.60
   6   7  -1   26.90    2.20
   6   7  -1   27.50    2.60
   6   7  -1   30.50    2.60
   6   7  -1   29.60    2.70
   6   7  -1   26.20    2.30
  -6  -7   1   28.40    2.40
   5   7  -1  315.27   11.60
   5   7  -1  310.77   11.40
   5   7  -1  333.67   11.40
   5   7  -1  316.77   12.00
   5   7  -1  320.57   11.50
   5   7  -1  307.67   12.40
   5   7  -1  305.77   12.80
  -5  -7   1  310.77   12.40
  -5  -7   1  318.37   13.00
   4   7  -1    0.60    0.40
   4   7  -1    4.30    1.60
   4   7  -1    0.30    0.90
   4   7  -1    0.20    1.00
   4   7  -1    0.70    1.30
   4   7  -1    1.00    0.90
   4   7  -1    1.40    1.30
   4   7  -1    0.30    1.00
  -4  -7   1    1.80    1.20
   3   7  -1  338.47   11.20
   3   7  -1  296.77   10.90
   3   7  -1  329.47   11.00
   3   7  -1  296.87   12.60
  -3  -7   1  313.37   11.10
  -3  -7   1  293.57   12.10
   2   7  -1  145.69    6.20
   2   7  -1  156.78    5.50
   2   7  -1  141.19    6.60
   2   7  -1  144.89    5.40
   2   7  -1  144.69    6.40
   2   7  -1  136.79    5.20
   2   7  -1  149.19    5.30
  -2  -7   1  150.88    5.40
  -2  -7   1  146.99    6.40
   1   7  -1  387.36   15.00
   1   7  -1  381.86   15.60
   1   7  -1  402.56   14.60
   1   7  -1  408.36   13.60
   1   7  -1  386.86   13.60
  -1  -7   1  405.16   13.70
  -1  -7   1  389.66   15.00
   0   7  -1  205.78    9.00
   0   7  -1  208.78    8.90
   0   7  -1  227.38    8.40
   0   7  -1  209.58    8.50
   0   7  -1  218.58    7.30
   0   7  -1  202.18    7.30
   0  -7   1  210.08    8.50
  -1   7  -1  487.55   16.90
  -1   7  -1  493.15   19.40
  -1   7  -1  493.25   18.40
  -1   7  -1  494.25   17.90
  -1   7  -1  504.35   19.70
   1  -7   1  495.15   18.40
  -2   7  -1  129.59    5.50
  -2   7  -1  130.39    4.70
  -2   7  -1  133.49    6.20
  -2   7  -1  131.49    6.10
   2  -7   1  127.29    4.70
   2  -7   1  133.89    5.60
  -3   7  -1   54.89    2.50
  -3   7  -1   50.39    3.10
  -3   7  -1   63.69    3.60
  -3   7  -1   60.59    2.60
  -3   7  -1   63.09    3.80
  -3   7  -1   60.69    2.30
   3  -7   1   62.79    3.60
   3  -7   1   62.69    3.20
   3  -7   1   61.09    2.50
  -4   7  -1  767.82   30.50
  -4   7  -1  758.92   26.60
  -4   7  -1  775.12   26.30
  -4   7  -1  753.02   26.30
  -4   7  -1  757.42   29.80
  -4   7  -1  800.32   26.60
   4  -7   1  759.12   26.70
   4  -7   1  795.92   28.10
   4  -7   1  789.12   27.30
   4  -7   1  752.02   30.40
  -5   7  -1   55.79    2.70
  -5   7  -1   55.59    2.70
  -5   7  -1   58.59    2.80
  -5   7  -1   60.69    2.80
  -5   7  -1   56.29    3.70
  -5   7  -1   54.69    3.90
   5  -7   1   52.19    2.80
   5  -7   1   61.59    3.10
   5  -7   1   60.69    3.10
   5  -7   1   55.19    3.70
  -6   7  -1   66.99    3.20
  -6   7  -1   69.49    3.30
  -6   7  -1   62.39    4.10
  -6   7  -1   67.69    3.30
   6  -7   1   67.79    3.30
   6  -7   1   74.39    3.40
   6  -7   1   69.89    4.50
  -7   7  -1   47.90    2.60
  -7   7  -1   43.80    3.40
   7  -7   1   35.40    2.50
   7  -7   1   44.60    2.50
   7  -7   1   48.70    3.60
  -8   7  -1   36.10    2.70
  -8   7  -1   37.40    3.40
  -8   7  -1   35.40    2.50
   8  -7   1   33.90    3.50
   8  -7   1   35.90    2.60
  -9   7  -1   -1.20    1.10
  -9   7  -1    0.20    1.50
  -9   7  -1    0.60    1.60
   9  -7   1    0.60    1.70
   9  -7   1    1.50    1.40
 -10   7  -1    0.40    1.40
 -10   7  -1   -1.30    1.60
  10  -7   1    1.00    1.90
  10  -7   1   -0.80    1.50
 -11   7  -1   21.70    2.50
 -11   7  -1   17.90    2.50
  11  -7   1   19.10    3.00
  11  -7   1   18.60    2.50
 -12   7  -1    1.10    1.80
 -12   7  -1    2.00    2.00
  12  -7   1    0.20    2.20
  12  -7   1    0.80    1.70
 -13   7  -1   13.60    2.70
 -13   7  -1   13.00    2.60
  13  -7   1   11.30    2.40
  13  -7   1    7.80    3.00
 -14   7  -1    3.50    2.50
 -14   7  -1    0.70    2.30
  14  -7   1   -0.60    2.90
  14  -7   1    1.90    2.30
  17   6  -1    2.10    3.90
  17   6  -1   -1.10    3.80
  17   6  -1    2.20    2.90
  16   6  -1    1.20    3.50
  16   6  -1    3.70    3.60
  16   6  -1    3.80    2.70
  15   6  -1    2.40    2.30
  15   6  -1    0.60    3.10
  15   6  -1    1.50    3.30
  14   6  -1   11.90    3.70
  14   6  -1   14.50    2.80
  14   6  -1    5.90    4.00
  13   6  -1    9.90    2.10
  13   6  -1    7.40    3.00
  13   6  -1    4.30    2.90
  13   6  -1    5.00    2.20
 -13  -6   1    4.20    1.90
  12   6  -1    0.20    1.60
  12   6  -1   -0.80    1.60
  12   6  -1    0.10    2.30
  12   6  -1   -2.30    1.60
  12   6  -1    3.70    2.40
  12   6  -1   -2.40    2.00
  12   6  -1    0.50    2.60
 -12  -6   1    0.90    1.70
  11   6  -1    7.10    2.30
  11   6  -1   10.20    2.50
  11   6  -1   10.20    2.00
  11   6  -1    3.50    2.60
  11   6  -1    8.80    1.80
  11   6  -1    7.30    1.90
  11   6  -1    7.80    2.70
 -11  -6   1    8.00    2.00
 -11  -6   1    8.20    1.90
 -11  -6   1    6.90    1.90
  10   6  -1    9.60    2.30
  10   6  -1   10.60    1.90
  10   6  -1    9.20    2.00
  10   6  -1    2.80    2.40
  10   6  -1    8.10    2.20
  10   6  -1    9.20    1.70
  10   6  -1    8.10    2.30
  10   6  -1   11.10    1.80
 -10  -6   1   10.90    1.90
 -10  -6   1   10.10    1.80
 -10  -6   1   10.90    2.00
   9   6  -1   49.50    3.50
   9   6  -1   49.50    3.70
   9   6  -1   51.99    4.10
   9   6  -1   50.09    3.80
   9   6  -1   48.80    3.10
   9   6  -1   48.30    3.20
   9   6  -1   55.59    3.20
   9   6  -1   45.20    3.20
  -9  -6   1   54.29    3.20
  -9  -6   1   47.90    3.30
  -9  -6   1   50.99    3.30
   8   6  -1   11.10    1.80
   8   6  -1   13.50    2.40
   8   6  -1   14.00    2.10
   8   6  -1   11.60    1.70
   8   6  -1   10.00    1.40
   8   6  -1   14.30    2.00
   8   6  -1   13.30    2.10
   8   6  -1    9.10    1.80
  -8  -6   1   12.20    1.90
  -8  -6   1   12.00    1.60
  -8  -6   1   13.20    1.80
   7   6  -1  134.19    5.80
   7   6  -1  146.79    6.70
   7   6  -1  133.39    5.80
   7   6  -1  140.99    6.00
   7   6  -1  139.09    6.10
   7   6  -1  115.69    5.80
   7   6  -1  143.59    6.60
  -7  -6   1  134.19    6.00
  -7  -6   1  136.29    5.60
  -7  -6   1  138.79    5.50
   6   6  -1    1.60    1.40
   6   6  -1    2.50    1.70
   6   6  -1    3.20    1.50
   6   6  -1    1.10    1.10
   6   6  -1   -0.40    1.30
   6   6  -1    0.00    1.20
  -6  -6   1    0.10    1.00
  -6  -6   1    1.60    1.20
  -6  -6   1   -0.10    1.10
   5   6  -1    1.10    1.40
   5   6  -1   -0.70    1.10
   5   6  -1   -1.20    1.00
   5   6  -1    1.20    1.10
   5   6  -1   -0.80    1.20
   5   6  -1    1.20    1.50
  -5  -6   1    0.00    1.20
   4   6  -1    8.30    1.30
   4   6  -1    8.30    1.60
   4   6  -1    9.70    1.30
   4   6  -1    9.80    1.30
   4   6  -1    8.30    1.70
   4   6  -1    9.30    1.50
   4   6  -1    7.90    1.70
   4   6  -1   10.60    1.20
  -4  -6   1    9.60    1.50
  -4  -6   1   10.00    0.80
   3   6  -1    1.50    1.10
   3   6  -1    8.00    1.50
   3   6  -1    5.80    1.00
   3   6  -1    4.30    0.80
   3   6  -1    2.80    0.70
   3   6  -1    6.60    1.30
   3   6  -1    5.20    1.30
   3   6  -1    5.50    1.00
  -3  -6   1    5.60    0.90
   2   6  -1    9.90    1.00
   2   6  -1    7.90    1.30
   2   6  -1   12.80    1.00
   2   6  -1   14.90    1.20
   2   6  -1   13.50    1.60
  -2  -6   1   11.80    1.60
  -2  -6   1   13.40    1.10
   1   6  -1    9.50    1.60
   1   6  -1   13.50    1.60
   1   6  -1   18.40    1.20
   1   6  -1   13.60    1.60
  -1  -6   1   15.60    1.80
  -1  -6   1   15.40    1.00
   0   6  -1    3.90    1.10
   0  -6   1   20.50    1.80
  -1   6  -1   42.80    2.90
  -1   6  -1   50.09    1.70
  -1   6  -1   45.00    2.80
  -1   6  -1   37.30    1.70
   1  -6   1   47.50    2.70
  -2   6  -1    2.10    1.20
  -2   6  -1    3.00    0.60
  -2   6  -1    2.00    1.20
  -2   6  -1   -0.30    1.00
  -2   6  -1    2.90    0.60
  -2   6  -1    4.30    1.30
   2  -6   1    3.60    0.60
   2  -6   1    3.60    1.20
  -3   6  -1    5.70    1.20
  -3   6  -1    4.00    0.60
  -3   6  -1    2.90    1.40
  -3   6  -1    3.80    0.60
  -3   6  -1    2.50    1.10
  -3   6  -1    5.90    1.60
  -3   6  -1    3.10    0.70
  -3   6  -1    3.90    0.70
   3  -6   1    3.90    1.40
   3  -6   1    2.60    0.70
   3  -6   1    5.90    1.20
  -4   6  -1    1.70    0.70
  -4   6  -1    1.90    0.80
  -4   6  -1    1.70    0.80
  -4   6  -1    1.10    1.20
  -4   6  -1    1.60    1.00
  -4   6  -1    2.30    1.30
  -4   6  -1    1.50    0.80
   4  -6   1    2.20    0.80
   4  -6   1    3.00    1.20
   4  -6   1    1.80    1.30
   4  -6   1    2.10    1.00
  -5   6  -1    1.10    0.80
  -5   6  -1    1.70    1.40
  -5   6  -1    0.80    0.90
  -5   6  -1    1.30    1.00
  -5   6  -1    0.80    0.80
   5  -6   1    1.20    1.10
   5  -6   1   -0.30    1.00
   5  -6   1    0.90    0.80
   5  -6   1    1.10    1.30
  -6   6  -1    2.20    1.20
  -6   6  -1    2.10    1.00
  -6   6  -1    2.50    1.10
  -6   6  -1    3.20    0.90
   6  -6   1    1.60    1.00
   6  -6   1    0.20    0.50
   6  -6   1    2.70    1.40
   6  -6   1    4.30    1.00
  -7   6  -1    0.00    0.50
  -7   6  -1    6.20    1.30
  -7   6  -1    0.40    0.80
  -7   6  -1    0.10    0.80
   7  -6   1    5.50    1.00
   7  -6   1    0.50    1.20
   7  -6   1   -0.40    0.60
  -8   6  -1    2.00    1.60
  -8   6  -1   -2.20    1.10
  -8   6  -1    0.70    1.00
   8  -6   1   -0.10    1.50
   8  -6   1    0.00    1.10
  -9   6  -1   10.20    1.90
  -9   6  -1   11.40    1.70
  -9   6  -1    8.40    2.40
   9  -6   1   10.60    1.80
   9  -6   1    9.80    2.20
 -10   6  -1    1.80    1.60
 -10   6  -1    4.70    1.60
  10  -6   1    2.90    1.60
  10  -6   1    2.20    1.70
 -11   6  -1    0.90    1.80
 -11   6  -1    0.40    1.70
  11  -6   1    1.20    1.70
  11  -6   1    4.60    2.30
 -12   6  -1    2.10    1.90
 -12   6  -1    1.50    1.70
  12  -6   1    1.40    2.00
  12  -6   1    1.50    1.80
 -13   6  -1    0.60    2.00
 -13   6  -1    3.70    2.20
  13  -6   1   -1.10    2.10
  13  -6   1    1.60    2.00
 -14   6  -1    2.10    2.30
 -14   6  -1   -1.10    2.30
  14  -6   1    5.10    2.40
  14  -6   1    2.60    2.70
  17   5  -1   -4.40    2.80
  17   5  -1   -1.30    2.80
  17   5  -1   -2.80    3.50
  16   5  -1    4.00    3.10
  16   5  -1    3.80    2.70
  16   5  -1   -0.10    3.30
  15   5  -1   27.00    3.40
  15   5  -1   21.60    3.60
  15   5  -1   24.20    4.10
  14   5  -1   32.00    4.50
  14   5  -1   35.70    3.60
  14   5  -1   32.40    4.30
  13   5  -1    1.90    2.70
  13   5  -1    0.50    2.00
  13   5  -1    0.70    2.60
  12   5  -1  169.18    8.60
  12   5  -1  171.38    8.10
  12   5  -1  165.98    8.60
  12   5  -1  164.58    8.20
  12   5  -1  164.78    7.10
  12   5  -1  163.08    7.80
  12   5  -1  170.88    7.60
  12   5  -1  156.98    7.20
 -12  -5   1  168.88    7.50
 -12  -5   1  164.08    7.30
 -12  -5   1  170.48    7.70
  11   5  -1    0.70    1.60
  11   5  -1    0.40    1.90
  11   5  -1   -0.80    1.40
  11   5  -1   -1.50    1.80
  11   5  -1    0.10    2.20
  11   5  -1   -1.40    1.40
  11   5  -1   -0.40    2.00
  11   5  -1    1.40    1.60
 -11  -5   1    0.40    1.50
 -11  -5   1    1.10    1.50
 -11  -5   1    0.30    1.60
  10   5  -1    2.90    1.80
  10   5  -1   -0.30    1.80
  10   5  -1    1.60    1.50
  10   5  -1    1.70    1.60
  10   5  -1    5.10    2.00
  10   5  -1    0.50    1.00
  10   5  -1    3.00    2.20
  10   5  -1    3.20    1.50
 -10  -5   1    1.70    1.50
 -10  -5   1    2.10    1.40
 -10  -5   1    3.80    1.50
   9   5  -1   28.80    2.60
   9   5  -1   29.50    2.90
   9   5  -1   26.70    2.50
   9   5  -1   32.80    3.20
   9   5  -1   27.40    2.50
   9   5  -1   29.80    2.50
   9   5  -1   24.00    2.70
   9   5  -1   32.40    3.00
  -9  -5   1   29.10    2.40
  -9  -5   1   28.30    2.50
  -9  -5   1   32.40    2.70
   8   5  -1  617.34   24.40
   8   5  -1  627.84   24.70
   8   5  -1  623.54   22.10
   8   5  -1  599.04   23.00
   8   5  -1  647.84   22.30
   8   5  -1  614.54   25.40
   8   5  -1  618.54   22.30
   8   5  -1  604.24   22.30
  -8  -5   1  623.94   23.10
  -8  -5   1  618.94   22.20
  -8  -5   1  642.14   21.90
   7   5  -1  346.97   12.70
   7   5  -1  346.77   13.90
   7   5  -1  349.47   14.10
   7   5  -1  339.57   13.90
   7   5  -1  332.37   12.70
   7   5  -1  342.07   12.60
   7   5  -1  320.47   13.00
   7   5  -1  343.17   12.50
  -7  -5   1  352.26   12.50
  -7  -5   1  330.87   13.00
  -7  -5   1  331.97   12.30
   6   5  -1   52.19    3.40
   6   5  -1   47.30    3.00
   6   5  -1   45.70    2.80
   6   5  -1   49.60    3.00
   6   5  -1   38.40    3.30
   6   5  -1   50.79    2.90
  -6  -5   1   53.79    2.80
  -6  -5   1   50.09    3.00
  -6  -5   1   46.70    2.50
   5   5  -1   49.60    2.90
   5   5  -1   42.70    2.70
   5   5  -1   53.29    2.90
   5   5  -1   49.00    2.80
   5   5  -1   49.40    3.30
  -5  -5   1   47.30    2.60
  -5  -5   1   54.69    2.50
  -5  -5   1   44.20    2.90
   4   5  -1  228.88    8.70
   4   5  -1  236.58    9.80
   4   5  -1  225.58    8.80
   4   5  -1  232.18    9.40
   4   5  -1  237.98    9.10
   4   5  -1  250.87    8.70
  -4  -5   1  249.08    9.90
  -4  -5   1  251.37    8.60
   3   5  -1  128.69    4.70
   3   5  -1  127.89    4.80
   3   5  -1  119.89    5.10
   3   5  -1  122.69    4.80
   3   5  -1  118.29    5.30
   3   5  -1  116.09    5.40
   2   5  -1  550.94   21.30
   2   5  -1  574.74   19.20
   2   5  -1  539.55   21.60
   2   5  -1  563.34   18.90
  -2  -5   1  542.25   20.40
  -2  -5   1  559.14   19.20
   1   5  -1   66.79    2.60
   1   5  -1   67.99    3.50
   1   5  -1   65.19    3.30
  -1  -5   1   63.19    3.40
  -1  -5   1   63.19    2.50
   0   5  -1  110.69    5.10
   0   5  -1  116.59    4.80
   0   5  -1  110.49    4.00
   0   5  -1  117.89    4.90
   0   5  -1  114.09    5.10
   0   5  -1  114.79    4.00
   0  -5   1  118.69    4.90
  -1   5  -1  549.74   20.00
  -1   5  -1  551.54   18.60
  -1   5  -1  542.85   19.40
   1  -5   1  535.65   19.90
  -2   5  -1    2.10    0.60
  -2   5  -1    2.60    1.10
  -2   5  -1    2.20    1.20
  -2   5  -1    2.90    1.10
  -2   5  -1    3.80    1.30
  -2   5  -1    2.40    0.60
   2  -5   1    2.40    0.90
   2  -5   1    2.90    0.60
  -3   5  -1   50.49    3.10
  -3   5  -1   47.90    2.10
  -3   5  -1   47.20    2.50
  -3   5  -1   49.10    2.20
  -3   5  -1   53.19    3.10
  -3   5  -1   48.30    2.60
  -3   5  -1   48.10    2.20
  -3   5  -1   46.60    2.00
   3  -5   1   52.09    2.60
   3  -5   1   50.89    3.10
   3  -5   1   44.20    2.10
  -4   5  -1   -0.80    0.60
  -4   5  -1    0.00    0.80
  -4   5  -1    1.50    0.90
  -4   5  -1    0.10    1.00
  -4   5  -1    0.30    1.30
  -4   5  -1    0.70    0.80
  -4   5  -1    0.50    0.70
   4  -5   1    0.60    1.30
   4  -5   1    0.50    1.00
   4  -5   1    0.50    0.70
   4  -5   1    1.40    1.00
  -5   5  -1    1.90    0.90
  -5   5  -1    0.20    0.20
  -5   5  -1    2.40    1.00
  -5   5  -1    0.40    0.70
  -5   5  -1    2.70    1.20
   5  -5   1    0.00    0.90
   5  -5   1    0.80    0.60
   5  -5   1    1.90    0.80
   5  -5   1    0.80    1.10
  -6   5  -1   17.30    1.60
  -6   5  -1   16.80    1.50
  -6   5  -1   14.30    1.60
   6  -5   1   11.10    1.20
   6  -5   1   15.10    1.90
   6  -5   1   18.50    1.40
   6  -5   1   15.40    1.20
  -7   5  -1   47.30    2.70
  -7   5  -1   44.40    2.70
  -7   5  -1   43.30    2.70
   7  -5   1   42.90    2.10
   7  -5   1   29.20    2.40
  -8   5  -1    0.00    0.90
  -8   5  -1   -0.50    1.00
  -8   5  -1    0.30    1.20
   8  -5   1   -0.50    1.10
   8  -5   1   -0.70    0.80
  -9   5  -1   18.00    2.00
  -9   5  -1   18.30    2.20
   9  -5   1   16.50    2.10
   9  -5   1   20.30    2.70
 -10   5  -1   14.90    2.20
 -10   5  -1   18.10    2.20
  10  -5   1   15.10    2.70
  10  -5   1   13.30    2.20
 -11   5  -1   14.90    2.30
 -11   5  -1   13.50    2.10
  11  -5   1   12.40    2.20
  11  -5   1    6.80    2.50
 -12   5  -1    2.00    1.80
 -12   5  -1    0.70    1.80
  12  -5   1   -0.90    1.70
  12  -5   1    1.00    1.50
  12  -5   1    0.30    1.90
 -13   5  -1    1.30    2.10
 -13   5  -1   -1.70    1.90
  13  -5   1    1.00    1.70
  13  -5   1    0.50    2.00
  13  -5   1    1.50    2.00
 -14   5  -1    2.70    2.30
 -14   5  -1    4.40    2.50
  14  -5   1   -0.60    2.10
  14  -5   1   -1.30    2.70
  14  -5   1    5.30    2.40
  14  -5   1    5.40    2.00
 -15   5  -1   -5.20    2.20
 -15   5  -1    1.30    2.50
  15  -5   1    2.00    2.40
  15  -5   1    4.10    2.80
  15  -5   1    1.20    3.10
  15  -5   1    1.90    2.10
  17   4  -1    4.10    3.80
  17   4  -1    3.40    2.90
  17   4  -1    4.80    3.60
  16   4  -1   -5.10    3.20
  16   4  -1   -3.50    3.00
  16   4  -1    4.20    2.60
  15   4  -1    9.70    3.30
  15   4  -1    7.90    3.10
  15   4  -1    9.40    2.70
  14   4  -1   -8.30    2.60
  14   4  -1    0.80    2.80
  14   4  -1   -0.10    2.10
  13   4  -1   12.70    3.00
  13   4  -1   13.40    2.40
  13   4  -1   13.10    2.50
  13   4  -1   13.80    2.90
 -13  -4   1   10.90    2.40
 -13  -4   1   14.30    2.50
  12   4  -1   16.60    3.00
  12   4  -1   21.20    2.30
  12   4  -1   20.70    2.60
  12   4  -1   20.00    3.20
  12   4  -1   17.40    2.50
 -12  -4   1   18.70    2.60
 -12  -4   1   19.60    2.10
 -12  -4   1   19.60    2.50
  11   4  -1    0.10    1.40
  11   4  -1   -0.70    1.80
  11   4  -1   -1.40    2.10
  11   4  -1   -0.70    1.50
  11   4  -1    0.10    1.50
  11   4  -1    0.10    1.70
  11   4  -1    0.10    1.30
  11   4  -1    1.70    2.00
 -11  -4   1   -2.30    1.30
 -11  -4   1    1.20    1.60
 -11  -4   1   -1.70    1.40
  10   4  -1   34.60    3.20
  10   4  -1   32.60    3.20
  10   4  -1   28.30    2.50
  10   4  -1   34.20    3.20
  10   4  -1   36.20    2.70
  10   4  -1   33.80    3.00
  10   4  -1   34.90    2.90
  10   4  -1   33.70    3.00
 -10  -4   1   37.50    2.80
 -10  -4   1   32.80    2.60
 -10  -4   1   35.50    2.90
   9   4  -1    3.80    1.40
   9   4  -1    2.10    1.40
   9   4  -1    2.90    1.80
   9   4  -1    2.00    1.10
   9   4  -1    3.80    1.40
   9   4  -1    2.20    1.70
   9   4  -1    5.20    2.00
   9   4  -1    5.90    1.80
  -9  -4   1    4.60    1.40
  -9  -4   1    4.10    1.40
  -9  -4   1    6.00    1.50
   8   4  -1   28.50    2.20
   8   4  -1   30.60    2.70
   8   4  -1   37.10    2.50
   8   4  -1   29.00    2.60
   8   4  -1   40.80    2.80
   8   4  -1   31.40    2.40
   8   4  -1   32.40    3.20
   8   4  -1   29.00    3.20
  -8  -4   1   36.30    2.40
  -8  -4   1   31.70    2.50
  -8  -4   1   27.50    2.40
   7   4  -1  294.37   12.40
   7   4  -1  286.97   11.30
   7   4  -1  307.37   11.00
   7   4  -1  284.67   10.90
   7   4  -1  301.87   12.30
   7   4  -1  303.47   11.10
   7   4  -1  305.37   12.30
   7   4  -1  289.97   11.10
  -7  -4   1  284.87   10.80
  -7  -4   1  278.57   10.90
   6   4  -1   47.60    3.00
   6   4  -1   44.60    2.80
   6   4  -1   40.40    2.90
   6   4  -1   39.70    2.50
   6   4  -1   44.10    2.50
   6   4  -1   41.30    2.60
   6   4  -1   44.40    2.50
  -6  -4   1   44.60    2.50
  -6  -4   1   41.90    2.60
   5   4  -1   -0.80    0.70
   5   4  -1   -0.30    1.10
   5   4  -1    0.90    1.10
   5   4  -1    0.20    1.20
   5   4  -1   -0.90    1.10
   5   4  -1    0.30    1.10
   5   4  -1    0.60    1.20
  -5  -4   1    0.00    0.90
  -5  -4   1   -1.10    1.00
  -5  -4   1   -0.20    1.00
   4   4  -1    2.00    1.20
   4   4  -1   -0.60    1.20
   4   4  -1    3.70    1.20
   4   4  -1    0.60    1.10
   4   4  -1   -0.30    1.10
   4   4  -1    1.20    1.00
   4   4  -1    2.30    0.50
  -4  -4   1    2.30    1.00
  -4  -4   1    1.00    0.80
  -4  -4   1    2.00    1.20
   3   4  -1   75.69    3.60
   3   4  -1   75.99    3.00
   3   4  -1   66.49    3.10
   3   4  -1   73.39    3.20
   3   4  -1   72.59    3.60
   3   4  -1   71.19    3.50
   3   4  -1   76.59    3.40
  -3  -4   1   68.69    3.30
  -3  -4   1   72.39    3.20
  -3  -4   1   70.29    3.00
   2   4  -1  262.97    9.00
   2   4  -1  259.57   10.20
   2   4  -1  249.18    9.70
   2   4  -1  252.97   10.30
   2   4  -1  266.57    9.10
   2   4  -1  249.18    9.50
   1   4  -1   18.20    1.20
   1   4  -1   17.10    0.90
   1   4  -1   18.30    1.50
   1   4  -1   18.50    1.50
   1   4  -1   17.90    1.60
   1   4  -1   17.90    1.70
   1   4  -1   17.90    1.10
   1   4  -1   16.30    0.90
  -1  -4   1   16.70    1.50
  -1  -4   1   19.00    1.10
   0   4  -1    0.70    0.40
   0   4  -1   -0.50    1.10
   0   4  -1   -1.00    1.10
   0   4  -1    0.40    1.10
   0   4  -1   -0.20    1.00
   0   4  -1    0.20    0.40
   0  -4   1    0.80    1.10
  -1   4  -1   17.10    1.60
  -1   4  -1   16.70    0.90
  -1   4  -1   19.80    1.70
  -1   4  -1   20.50    1.70
  -1   4  -1   19.00    1.60
  -1   4  -1   18.20    0.90
   1  -4   1   19.20    1.60
  -2   4  -1    4.00    1.20
  -2   4  -1    5.30    0.70
  -2   4  -1    4.40    1.10
  -2   4  -1    1.20    1.10
  -2   4  -1   -0.60    0.90
  -2   4  -1    4.60    0.50
   2  -4   1    5.80    1.10
   2  -4   1    4.30    0.70
  -3   4  -1   -0.20    0.90
  -3   4  -1    0.40    0.50
  -3   4  -1    0.10    0.50
  -3   4  -1   -0.50    0.60
  -3   4  -1   -0.30    0.90
  -3   4  -1    1.50    0.70
  -3   4  -1   -0.90    0.90
   3  -4   1    0.20    0.60
   3  -4   1   -0.40    1.10
   3  -4   1    0.80    0.90
   3  -4   1    0.30    0.90
  -4   4  -1    1.20    0.90
  -4   4  -1    1.00    0.70
  -4   4  -1    0.70    1.30
  -4   4  -1    1.30    1.10
  -4   4  -1   -0.30    0.20
  -4   4  -1    1.40    0.80
   4  -4   1    2.60    0.90
   4  -4   1    3.10    0.90
   4  -4   1    1.40    1.20
   4  -4   1    1.00    0.60
  -5   4  -1   58.59    2.80
  -5   4  -1   56.29    2.60
  -5   4  -1   60.79    2.80
  -5   4  -1   44.60    2.40
   5  -4   1   57.89    2.50
  -6   4  -1    0.30    0.80
  -6   4  -1    1.80    1.00
  -6   4  -1    0.30    1.00
  -6   4  -1   -0.10    0.70
  -6   4  -1    0.20    1.00
   6  -4   1    0.90    0.70
   6  -4   1    0.00    0.40
   6  -4   1    0.10    0.50
   6  -4   1    0.10    0.90
  -7   4  -1    7.30    1.40
  -7   4  -1    9.70    1.40
  -7   4  -1    7.70    1.80
  -7   4  -1    9.40    1.40
  -7   4  -1    9.70    1.40
   7  -4   1    5.90    1.30
   7  -4   1    5.80    1.30
   7  -4   1    8.20    0.90
  -8   4  -1    0.20    1.00
  -8   4  -1   -1.30    1.10
  -8   4  -1    0.00    1.20
   8  -4   1    0.20    0.60
   8  -4   1    0.80    1.20
   8  -4   1    1.00    1.10
  -9   4  -1    2.50    1.30
  -9   4  -1    3.30    1.50
   9  -4   1    2.70    1.40
   9  -4   1    4.00    1.80
 -10   4  -1    2.20    1.60
 -10   4  -1    4.70    1.60
  10  -4   1    2.10    1.90
  10  -4   1    0.00    1.50
 -11   4  -1   25.10    2.50
 -11   4  -1   19.60    2.50
  11  -4   1   18.30    2.10
  11  -4   1   16.60    3.00
  11  -4   1   16.20    2.30
 -12   4  -1    4.20    1.90
 -12   4  -1    3.10    1.90
  12  -4   1    1.40    1.60
  12  -4   1    3.50    2.00
  12  -4   1    1.60    2.30
 -13   4  -1    1.90    2.00
 -13   4  -1    3.80    2.20
  13  -4   1    3.20    2.10
  13  -4   1    1.90    1.80
  13  -4   1    6.20    2.80
  13  -4   1    3.40    2.00
 -14   4  -1    5.70    2.50
 -14   4  -1    3.10    2.20
  14  -4   1    1.70    2.40
  14  -4   1    6.50    2.40
  14  -4   1    3.00    2.00
  14  -4   1    4.10    2.60
 -15   4  -1   -1.80    2.30
 -15   4  -1    2.10    2.40
  15  -4   1   -0.60    2.40
  15  -4   1    1.00    2.00
  15  -4   1    0.40    3.00
  15  -4   1   -2.80    2.10
  17   3  -1    4.30    3.50
  17   3  -1   -0.60    3.80
  17   3  -1   -0.90    2.60
  16   3  -1   -0.30    3.00
  16   3  -1   -2.80    2.10
  16   3  -1   -5.00    3.10
  15   3  -1    2.30    2.10
  15   3  -1   -1.00    2.30
  15   3  -1   -1.80    2.80
  14   3  -1   52.79    5.30
  14   3  -1   54.19    4.40
  14   3  -1   57.89    5.30
  14   3  -1   50.29    4.30
 -14  -3   1   50.79    4.10
 -14  -3   1   48.60    4.20
  13   3  -1   57.69    5.10
  13   3  -1   50.19    4.20
  13   3  -1   61.29    4.70
  13   3  -1   56.99    4.30
 -13  -3   1   46.50    4.10
 -13  -3   1   54.49    4.00
  12   3  -1    7.90    2.10
  12   3  -1    9.20    2.30
  12   3  -1    7.40    1.90
  12   3  -1    7.80    2.60
 -12  -3   1    7.00    2.10
 -12  -3   1    5.10    2.00
  11   3  -1  184.68    8.10
  11   3  -1  195.28    8.90
  11   3  -1  190.78    8.60
  11   3  -1  185.58    7.30
  11   3  -1  194.08    8.00
  11   3  -1  180.18    8.90
  11   3  -1  174.48    8.20
  11   3  -1  168.08    7.40
 -11  -3   1  181.08    7.90
 -11  -3   1  179.18    7.70
  10   3  -1   10.80    2.30
  10   3  -1   16.30    2.50
  10   3  -1   16.10    2.30
  10   3  -1   10.90    1.60
  10   3  -1   16.20    2.50
  10   3  -1   15.70    2.10
  10   3  -1   14.60    1.70
 -10  -3   1   13.60    1.90
 -10  -3   1   12.60    2.00
   9   3  -1   66.09    4.20
   9   3  -1   76.79    4.40
   9   3  -1   66.99    3.90
   9   3  -1   62.29    4.10
   9   3  -1   67.59    3.80
   9   3  -1   67.99    3.50
   9   3  -1   67.99    3.30
  -9  -3   1   69.59    3.70
  -9  -3   1   65.09    3.80
   8   3  -1   28.80    2.20
   8   3  -1   32.20    2.10
   8   3  -1   33.60    2.70
   8   3  -1   26.30    2.80
   8   3  -1   25.80    2.80
   8   3  -1   30.90    2.60
   8   3  -1   32.80    2.20
  -8  -3   1   27.80    2.30
  -8  -3   1   21.50    2.00
  -8  -3   1   30.10    2.40
   7   3  -1   -0.60    0.90
   7   3  -1    1.60    1.40
   7   3  -1   -0.10    1.10
   7   3  -1   -4.80    1.60
   7   3  -1    3.60    1.20
   7   3  -1    0.30    1.30
   7   3  -1   -0.10    1.00
  -7  -3   1    1.70    1.10
  -7  -3   1   -0.60    1.00
  -7  -3   1    1.60    1.20
   6   3  -1  329.57   13.60
   6   3  -1  347.87   14.20
   6   3  -1  348.27   12.40
   6   3  -1  353.36   12.50
   6   3  -1  349.17   12.60
   6   3  -1  338.37   12.80
   6   3  -1  329.67   12.40
  -6  -3   1  347.27   12.30
  -6  -3   1  341.47   12.80
  -6  -3   1  340.97   12.40
   5   3  -1  436.16   17.10
   5   3  -1  429.16   15.50
   5   3  -1  424.76   15.30
   5   3  -1  450.45   15.50
   5   3  -1  418.26   15.50
   5   3  -1  417.76   16.00
  -5  -3   1  450.75   15.30
  -5  -3   1  439.26   16.00
  -5  -3   1  440.66   15.40
   4   3  -1  286.57   10.70
   4   3  -1  306.37   12.30
   4   3  -1  297.37   10.90
   4   3  -1  307.27   12.00
   4   3  -1  297.97   11.30
   4   3  -1  290.77   10.80
  -4  -3   1  316.77   10.60
  -4  -3   1  292.37   11.20
  -4  -3   1  301.37   10.70
   3   3  -1   93.69    4.10
   3   3  -1  101.19    4.60
   3   3  -1  101.49    4.20
   3   3  -1  104.79    4.40
   3   3  -1  109.39    4.60
   3   3  -1  103.89    4.30
   3   3  -1  101.59    4.20
  -3  -3   1  101.19    4.30
  -3  -3   1  106.19    4.10
  -3  -3   1  104.79    4.00
   2   3  -1 2183.18   81.89
   2   3  -1 2368.76   79.39
   2   3  -1 2410.56   77.49
   2   3  -1 2228.78   77.49
   2   3  -1 2256.67   87.29
   2   3  -1 2363.66   78.09
   2   3  -1 2284.77   85.49
   2   3  -1 2273.37   78.09
  -2  -3   1 2312.17   77.39
  -2  -3   1 2321.87   81.99
   1   3  -1  568.54   19.00
   1   3  -1  566.94   21.60
   1   3  -1  541.85   19.00
   1   3  -1  542.25   21.20
   1   3  -1  587.54   19.20
  -1  -3   1  553.14   20.30
   0   3  -1 1530.75   53.19
   0   3  -1 1588.14   55.99
   0   3  -1 1532.95   54.19
   0   3  -1 1545.85   58.49
   0   3  -1 1581.64   53.19
   0   3  -1 1611.44   59.69
   0  -3   1 1599.74   55.99
  -1   3  -1   36.30    2.10
  -1   3  -1   32.80    2.00
  -1   3  -1   40.90    2.30
  -1   3  -1   35.10    1.50
  -1   3  -1   32.10    2.10
  -1   3  -1   36.30    1.50
   1  -3   1   34.80    1.90
  -2   3  -1 2110.69   71.29
  -2   3  -1 2124.19   69.49
  -2   3  -1 2018.70   69.49
  -2   3  -1 2103.89   73.59
  -2   3  -1 2039.70   70.09
  -2   3  -1 2122.19   70.09
  -2   3  -1 2097.89   76.99
  -2   3  -1 1832.92   78.59
   2  -3   1 2067.49   70.39
   2  -3   1 2150.78   73.59
  -3   3  -1    0.00    0.70
  -3   3  -1    0.00    0.70
  -3   3  -1    0.20    0.50
  -3   3  -1   -0.40    0.20
  -3   3  -1    0.10    0.40
  -3   3  -1   -0.40    0.70
   3  -3   1    0.80    0.80
   3  -3   1   -0.30    0.50
   3  -3   1    1.60    0.80
   3  -3   1    1.80    0.80
  -5   3  -1  211.08    9.00
  -5   3  -1  217.08    7.90
  -5   3  -1  212.08    7.70
  -5   3  -1  213.68    7.80
  -5   3  -1  211.48    7.80
   5  -3   1  215.88    7.70
   5  -3   1  202.38    9.00
   5  -3   1  210.88    7.70
   5  -3   1  211.68    7.90
  -6   3  -1   10.40    1.40
  -6   3  -1   12.90    1.40
  -6   3  -1   14.10    1.90
  -6   3  -1   10.10    1.30
  -6   3  -1   10.30    1.40
   6  -3   1   10.50    0.90
   6  -3   1   12.30    1.40
   6  -3   1   11.90    1.60
  -7   3  -1    2.00    1.50
  -7   3  -1    2.90    1.10
  -7   3  -1    1.80    1.00
  -7   3  -1   -0.80    1.00
  -7   3  -1    1.60    1.10
   7  -3   1    1.10    1.00
   7  -3   1    2.00    0.60
   7  -3   1   -0.20    1.00
  -8   3  -1   13.30    1.70
  -8   3  -1   14.50    1.70
   8  -3   1   18.20    1.00
   8  -3   1   18.40    1.90
   8  -3   1   16.30    2.30
  -9   3  -1    2.70    1.30
  -9   3  -1    0.40    1.40
   9  -3   1    1.30    1.30
   9  -3   1    2.90    1.70
 -10   3  -1   97.89    4.70
 -10   3  -1   90.29    4.80
  10  -3   1  101.49    5.00
  10  -3   1   98.99    5.80
  10  -3   1   92.09    4.90
 -11   3  -1   -1.90    1.50
 -11   3  -1   -0.80    1.50
  11  -3   1   -1.20    1.60
  11  -3   1    0.70    1.90
  11  -3   1   -0.70    1.30
 -12   3  -1   -0.60    1.70
 -12   3  -1   -1.80    1.60
  12  -3   1    0.50    1.50
  12  -3   1   -0.60    1.80
  12  -3   1   -2.50    2.00
 -13   3  -1    2.10    2.10
 -13   3  -1    2.50    1.80
  13  -3   1    0.80    1.90
  13  -3   1   -0.50    2.30
  13  -3   1   -0.80    1.70
  13  -3   1    1.60    1.90
 -14   3  -1    5.80    2.40
 -14   3  -1    6.10    2.50
  14  -3   1    3.70    2.00
  14  -3   1    4.40    2.40
  14  -3   1    5.20    2.40
  14  -3   1    5.30    2.50
 -15   3  -1    1.50    2.40
 -15   3  -1   -1.20    2.20
  15  -3   1   -0.70    2.10
  15  -3   1   -0.50    2.80
  15  -3   1    1.60    2.40
  15  -3   1   -1.20    1.90
 -16   3  -1   -0.30    2.70
 -16   3  -1    1.20    2.40
  16  -3   1    4.10    2.80
  16  -3   1    1.80    2.60
  16  -3   1    0.70    2.00
  16  -3   1   -2.90    3.20
  17   2  -1   23.40    4.80
  17   2  -1   20.80    3.50
  17   2  -1   20.10    3.90
  16   2  -1    1.80    2.30
  16   2  -1    7.50    3.20
  16   2  -1    5.00    3.60
  15   2  -1   19.40    3.60
  15   2  -1   14.50    2.80
  15   2  -1   16.00    3.80
  15   2  -1   16.70    3.00
 -15  -2   1   15.20    3.10
 -15  -2   1   13.80    2.80
  14   2  -1   10.60    2.50
  14   2  -1   16.40    3.50
  14   2  -1   15.30    3.30
  14   2  -1   16.50    2.80
 -14  -2   1   13.20    2.70
 -14  -2   1    9.10    2.50
  13   2  -1   29.20    3.80
  13   2  -1   26.60    3.10
  13   2  -1   28.20    3.20
  13   2  -1   32.90    4.00
 -13  -2   1   29.50    3.10
 -13  -2   1   27.20    3.30
  12   2  -1   26.30    3.30
  12   2  -1   31.30    3.20
  12   2  -1   32.90    3.70
  12   2  -1   29.80    3.10
 -12  -2   1   30.30    3.00
 -12  -2   1   28.80    3.10
  11   2  -1    0.40    1.80
  11   2  -1    4.90    2.10
  11   2  -1    3.60    1.80
  11   2  -1    4.60    1.70
 -11  -2   1    5.30    1.80
 -11  -2   1    2.30    1.60
  10   2  -1    4.50    2.00
  10   2  -1    7.60    1.30
  10   2  -1    9.70    2.00
  10   2  -1    5.00    1.70
  10   2  -1    9.50    2.20
  10   2  -1    6.30    1.60
 -10  -2   1    5.40    1.60
 -10  -2   1    5.40    1.70
 -10  -2   1    8.60    1.30
   9   2  -1   35.20    2.20
   9   2  -1   35.90    2.20
   9   2  -1   40.40    3.10
   9   2  -1   39.00    2.80
   9   2  -1   36.10    3.20
   9   2  -1   32.10    3.00
   9   2  -1   34.30    2.80
   9   2  -1   40.10    3.20
  -9  -2   1   35.20    2.30
  -9  -2   1   36.90    2.70
  -9  -2   1   31.60    2.70
   8   2  -1   -3.50    1.40
   8   2  -1    0.80    1.10
   8   2  -1    0.20    1.40
   8   2  -1    1.40    1.50
   8   2  -1   -1.20    1.10
   8   2  -1    0.70    1.00
   8   2  -1   -0.50    0.90
   8   2  -1   -2.90    1.20
  -8  -2   1    1.50    1.20
  -8  -2   1    0.60    1.00
  -8  -2   1    0.40    1.10
   7   2  -1   -3.80    1.50
   7   2  -1    3.50    1.00
   7   2  -1    3.10    1.10
   7   2  -1    3.80    1.40
   7   2  -1    3.20    1.10
   7   2  -1    0.40    1.40
   7   2  -1    4.30    1.00
   7   2  -1    2.40    1.50
  -7  -2   1    4.30    1.20
  -7  -2   1    2.00    1.10
  -7  -2   1    1.80    1.00
   6   2  -1    5.30    1.20
   6   2  -1    4.70    1.00
   6   2  -1    3.00    1.40
   6   2  -1    5.00    1.40
   6   2  -1    4.00    1.00
   6   2  -1    3.10    1.10
   6   2  -1    4.80    1.20
   6   2  -1    3.50    1.30
  -6  -2   1    4.80    1.20
  -6  -2   1    4.70    1.10
  -6  -2   1    4.80    1.20
   5   2  -1    0.30    0.80
   5   2  -1   -0.60    1.00
   5   2  -1    0.50    1.20
   5   2  -1   -0.50    0.90
   5   2  -1   -0.30    0.90
   5   2  -1   -0.40    0.20
   5   2  -1    0.20    1.10
   5   2  -1    1.30    0.90
  -5  -2   1   -1.10    0.90
  -5  -2   1    0.40    1.00
  -5  -2   1   -1.10    0.80
   4   2  -1    3.50    1.20
   4   2  -1    3.10    1.00
   4   2  -1    0.40    0.70
   4   2  -1    0.80    0.90
   4   2  -1    3.60    1.10
   4   2  -1    1.80    0.90
   4   2  -1    2.70    1.20
  -4  -2   1    2.20    0.90
  -4  -2   1    2.70    0.90
  -4  -2   1    1.60    1.00
   3   2  -1   20.60    1.50
   3   2  -1   22.80    1.60
   3   2  -1   21.00    1.80
   3   2  -1   20.10    1.80
   3   2  -1   23.20    1.70
   3   2  -1   24.00    1.80
   3   2  -1   24.30    1.70
  -3  -2   1   21.70    1.60
  -3  -2   1   22.30    1.60
  -3  -2   1   23.60    1.50
   2   2  -1   51.49    2.60
   2   2  -1   52.09    2.60
   2   2  -1   50.29    2.40
   2   2  -1   53.09    2.30
   2   2  -1   53.29    2.40
   2   2  -1   50.79    2.30
   2   2  -1   54.39    2.30
   2   2  -1   55.29    2.20
  -2  -2   1   53.19    2.30
  -2  -2   1   52.99    2.50
  -2  -2   1   53.19    2.20
   1   2  -1    0.60    0.50
   1   2  -1    0.90    0.50
   1   2  -1    1.30    0.50
   1   2  -1    0.70    0.80
   1   2  -1    0.10    0.10
   1   2  -1    0.10    0.50
   1   2  -1    0.60    0.80
   1   2  -1    0.80    0.60
  -1  -2   1    0.10    0.20
  -1  -2   1    0.80    0.40
   0   2  -1    0.30    0.40
   0   2  -1    0.40    0.30
   0   2  -1    0.00    0.60
   0   2  -1   -0.30    0.30
   0   2  -1    0.60    0.70
   0   2  -1   -0.10    0.60
   0   2  -1    0.60    0.60
   0  -2   1   -0.50    0.60
  -1   2  -1   11.30    1.10
  -1   2  -1   11.40    1.00
  -1   2  -1   14.10    1.10
  -1   2  -1   10.50    0.80
  -1   2  -1   10.70    0.80
  -1   2  -1   10.20    1.10
   1  -2   1   11.80    1.00
   1  -2   1   12.60    0.80
  -2   2  -1   -0.20    0.10
  -2   2  -1   -0.20    0.60
  -2   2  -1   -0.40    0.10
  -2   2  -1    1.10    0.60
  -2   2  -1   -0.10    0.70
  -2   2  -1    0.30    0.50
  -2   2  -1   -0.10    0.60
   2  -2   1    0.70    0.80
   2  -2   1    0.30    0.50
   2  -2   1    0.90    0.70
  -3   2  -1   13.20    1.10
  -3   2  -1   11.50    1.10
  -3   2  -1   14.60    1.20
  -3   2  -1   11.70    1.30
   3  -2   1   17.10    1.10
   3  -2   1   15.20    1.20
  -4   2  -1    6.50    1.00
  -4   2  -1    5.60    1.00
  -4   2  -1    4.20    0.90
  -4   2  -1    5.60    1.20
  -4   2  -1    5.00    0.80
   4  -2   1    5.60    0.60
   4  -2   1    5.20    0.70
  -5   2  -1   -0.90    0.90
  -5   2  -1   -0.10    0.80
  -5   2  -1   -0.80    0.90
  -5   2  -1   -1.50    0.80
  -5   2  -1    0.20    1.00
   5  -2   1    0.70    0.80
   5  -2   1   -1.20    0.50
   5  -2   1   -0.20    1.00
  -6   2  -1   45.00    2.90
  -6   2  -1   43.90    2.60
  -6   2  -1   45.70    2.50
  -6   2  -1   43.10    2.40
   6  -2   1   43.80    1.90
   6  -2   1   42.50    2.50
   6  -2   1   41.40    2.90
  -7   2  -1   27.30    2.00
  -7   2  -1   26.60    2.10
   7  -2   1   22.60    2.40
   7  -2   1   26.50    1.30
   7  -2   1   23.00    1.90
  -8   2  -1    5.50    1.30
  -8   2  -1    7.90    1.50
   8  -2   1    5.70    1.40
   8  -2   1    6.50    0.70
   8  -2   1    4.70    1.60
  -9   2  -1   -0.70    1.30
  -9   2  -1    0.70    1.20
   9  -2   1    1.00    1.40
   9  -2   1    0.40    1.30
   9  -2   1    1.10    1.00
   9  -2   1    0.70    0.60
 -10   2  -1   13.00    1.90
 -10   2  -1   15.40    2.10
  10  -2   1   14.90    2.30
  10  -2   1   15.00    2.10
  10  -2   1   14.60    1.80
 -11   2  -1    0.40    1.50
 -11   2  -1    0.90    1.60
  11  -2   1   -0.50    1.60
  11  -2   1    2.10    1.40
  11  -2   1    0.00    1.90
 -12   2  -1    2.20    1.80
 -12   2  -1   -0.20    1.90
  12  -2   1    1.40    1.80
  12  -2   1    4.00    1.70
  12  -2   1    2.70    2.30
  12  -2   1    3.20    1.90
 -13   2  -1    2.00    2.00
 -13   2  -1   -1.10    1.80
  13  -2   1    2.00    2.10
  13  -2   1    3.50    1.90
  13  -2   1   -1.50    2.20
  13  -2   1    1.40    1.90
 -14   2  -1   -1.80    2.10
 -14   2  -1    2.10    2.00
  14  -2   1   -3.00    1.90
  14  -2   1    0.00    2.40
  14  -2   1   -0.80    1.70
  14  -2   1    1.20    1.80
 -15   2  -1    2.50    2.40
 -15   2  -1    2.60    2.30
  15  -2   1    0.90    2.20
  15  -2   1    2.10    2.10
  15  -2   1    0.50    2.80
  15  -2   1    3.60    2.10
 -16   2  -1    0.10    2.50
 -16   2  -1   -0.10    2.50
  16  -2   1    3.20    2.30
  16  -2   1    4.30    2.40
  16  -2   1   -1.20    2.30
  16  -2   1   -1.40    3.20
  17   1  -1    0.10    3.00
  17   1  -1    4.00    2.80
  17   1  -1   -5.50    3.60
  16   1  -1    0.50    2.20
  16   1  -1    2.50    2.50
  16   1  -1   -3.90    2.10
  16   1  -1   -5.00    3.00
 -16  -1   1    2.90    2.50
 -16  -1   1    4.70    2.70
  15   1  -1    9.90    2.70
  15   1  -1    5.60    2.80
  15   1  -1    9.20    3.30
  15   1  -1   11.50    2.80
 -15  -1   1   10.60    2.80
 -15  -1   1   10.40    2.70
  14   1  -1   -2.90    2.00
  14   1  -1    0.30    2.30
  14   1  -1   -1.50    1.90
  14   1  -1   -2.60    2.50
 -14  -1   1    1.20    2.10
 -14  -1   1   -1.10    2.10
  13   1  -1   10.90    2.40
  13   1  -1    7.60    2.90
  13   1  -1    8.40    2.70
  13   1  -1   11.70    2.50
 -13  -1   1   10.50    2.50
 -13  -1   1    8.40    2.30
  12   1  -1    6.20    2.50
  12   1  -1    4.60    2.10
  12   1  -1    6.40    2.30
  12   1  -1    3.40    1.90
 -12  -1   1    3.70    1.90
 -12  -1   1    4.20    2.00
  11   1  -1   57.29    4.40
  11   1  -1   57.69    3.90
  11   1  -1   59.29    3.80
  11   1  -1   47.30    4.00
 -11  -1   1   57.39    3.70
 -11  -1   1   49.50    3.70
  10   1  -1  206.18    8.60
  10   1  -1  212.48    9.70
  10   1  -1  212.88    8.90
  10   1  -1  210.48    7.80
  10   1  -1  211.98    8.60
  10   1  -1  209.58    9.50
 -10  -1   1  205.48    8.60
 -10  -1   1  212.68    8.50
 -10  -1   1  205.98    7.90
   9   1  -1    8.00    2.00
   9   1  -1    7.80    2.00
   9   1  -1    8.10    1.60
   9   1  -1    9.30    1.10
   9   1  -1   10.30    1.80
   9   1  -1    9.70    1.80
  -9  -1   1    9.40    1.10
  -9  -1   1   10.20    1.80
  -9  -1   1   10.10    1.70
   8   1  -1  224.58    8.70
   8   1  -1  211.08    9.40
   8   1  -1  208.48    9.40
   8   1  -1  215.08    7.90
   8   1  -1  214.28    8.40
   8   1  -1  201.78    8.40
  -8  -1   1  216.18    8.40
  -8  -1   1  215.48    8.10
  -8  -1   1  220.68    8.30
   7   1  -1    8.30    1.40
   7   1  -1    5.20    1.60
   7   1  -1    3.20    1.60
   7   1  -1    9.30    1.00
   7   1  -1    9.30    1.30
   7   1  -1    8.30    1.60
   7   1  -1    7.90    1.00
  -7  -1   1    7.90    1.40
  -7  -1   1    6.40    1.10
  -7  -1   1    8.40    1.40
   6   1  -1   49.20    2.80
   6   1  -1   47.70    2.90
   6   1  -1   47.30    2.30
   6   1  -1   48.50    2.80
   6   1  -1   44.80    2.70
   6   1  -1   46.80    2.60
   6   1  -1   45.00    2.20
  -6  -1   1   46.70    2.60
  -6  -1   1   47.30    2.70
  -6  -1   1   44.90    2.30
   5   1  -1  165.18    6.00
   5   1  -1  161.78    6.30
   5   1  -1  169.98    6.20
   5   1  -1  161.18    6.30
   5   1  -1  160.78    7.00
   5   1  -1  160.48    6.40
  -5  -1   1  159.78    6.20
  -5  -1   1  163.68    6.20
  -5  -1   1  163.78    6.30
   4   1  -1  982.90   34.50
   4   1  -1  966.50   33.30
   4   1  -1  977.20   33.40
   4   1  -1  979.00   33.30
   4   1  -1  959.30   37.00
   4   1  -1  934.41   38.70
   4   1  -1  975.10   33.00
  -4  -1   1  975.60   33.20
  -4  -1   1  954.60   34.50
  -4  -1   1  948.61   32.90
   3   1  -1 1470.35   60.09
   3   1  -1 1502.65   53.69
   3   1  -1 1498.35   51.59
   3   1  -1 1546.35   57.39
   3   1  -1 1510.65   51.99
   3   1  -1 1485.75   51.09
   3   1  -1 1528.75   51.49
  -3  -1   1 1511.75   53.69
  -3  -1   1 1519.75   50.99
  -3  -1   1 1507.25   51.39
   2   1  -1  287.97   10.10
   2   1  -1  286.27   10.00
   2   1  -1  287.17   10.50
   2   1  -1  288.07   10.10
   2   1  -1  300.67   11.20
  -2  -1   1  279.17   10.00
  -2  -1   1  282.97    9.90
  -2  -1   1  283.47   10.40
   1   1  -1   -0.10    0.40
   1   1  -1    0.40    0.30
   1   1  -1   -0.30    0.50
   1   1  -1    0.30    0.60
   1   1  -1   -0.10    0.50
   1   1  -1    0.00    0.40
   1   1  -1    0.50    0.50
  -1  -1   1    0.60    0.40
  -1  -1   1    0.40    0.50
  -1  -1   1    0.40    0.40
   0   1  -1    0.00    0.30
   0   1  -1    0.00    0.20
   0   1  -1    1.10    0.30
   0   1  -1    1.20    0.20
   0  -1   1    1.60    0.20
   0  -1   1    0.90    0.50
  -2   1  -1   22.60    1.50
  -2   1  -1   21.70    1.30
  -2   1  -1   22.00    1.30
  -2   1  -1   21.60    1.30
   2  -1   1   22.00    1.20
   2  -1   1   24.30    1.30
   2  -1   1   20.90    1.20
  -3   1  -1  441.76   14.90
  -3   1  -1  422.86   15.10
  -3   1  -1  438.46   15.00
  -3   1  -1  436.46   16.90
  -3   1  -1  429.16   15.10
   3  -1   1  427.96   16.90
   3  -1   1  426.36   15.10
   3  -1   1  422.96   15.50
   3  -1   1  429.76   14.90
   3  -1   1  452.55   15.10
  -4   1  -1   96.99    4.00
  -4   1  -1  100.49    4.00
  -4   1  -1  104.29    4.60
  -4   1  -1   98.09    3.90
   4  -1   1  101.39    3.70
   4  -1   1   97.39    4.00
   4  -1   1  102.59    3.70
   4  -1   1  101.89    4.00
  -5   1  -1   72.09    3.20
  -5   1  -1   77.69    3.90
  -5   1  -1   74.29    3.30
   5  -1   1   76.19    2.90
   5  -1   1   75.39    3.70
   5  -1   1   76.89    3.50
   5  -1   1   78.59    3.40
  -6   1  -1  128.79    5.30
  -6   1  -1  133.69    5.40
   6  -1   1  134.99    5.50
   6  -1   1  127.19    6.00
   6  -1   1  138.69    5.40
   6  -1   1  140.09    4.90
   6  -1   1  131.29    5.40
  -7   1  -1  283.47   10.60
  -7   1  -1  277.57   10.40
   7  -1   1  275.77   11.90
   7  -1   1  292.17   10.70
   7  -1   1  289.87   10.60
   7  -1   1  290.97   10.10
   7  -1   1  290.27   10.50
   7  -1   1  278.87   11.90
  -8   1  -1   49.50    3.00
  -8   1  -1   46.90    2.90
   8  -1   1   50.09    3.40
   8  -1   1   53.59    2.20
   8  -1   1   51.99    3.00
   8  -1   1   51.29    3.00
   8  -1   1   54.69    3.20
   8  -1   1   54.19    3.10
  -9   1  -1   16.90    2.00
  -9   1  -1   15.60    2.00
   9  -1   1   20.60    1.20
   9  -1   1   15.70    1.70
   9  -1   1   17.70    2.40
   9  -1   1   18.40    2.00
 -10   1  -1    7.70    1.80
 -10   1  -1    8.80    1.70
  10  -1   1   11.30    1.90
  10  -1   1   10.20    1.60
  10  -1   1    9.50    1.90
 -11   1  -1    1.40    1.60
 -11   1  -1    2.80    1.70
  11  -1   1   -0.70    1.90
  11  -1   1    3.00    1.60
  11  -1   1    0.00    1.60
  11  -1   1    2.30    1.70
 -12   1  -1   19.60    2.60
 -12   1  -1   20.60    2.50
  12  -1   1   20.40    2.90
  12  -1   1   21.10    2.70
  12  -1   1   20.90    2.50
  12  -1   1   21.10    3.10
 -13   1  -1   57.49    4.30
 -13   1  -1   55.69    4.20
  13  -1   1   61.29    4.80
  13  -1   1   49.10    4.50
  13  -1   1   68.59    4.60
  13  -1   1   58.09    4.20
 -14   1  -1    1.40    2.10
 -14   1  -1    0.80    2.10
  14  -1   1    1.70    1.90
  14  -1   1    0.00    2.10
  14  -1   1    0.00    2.10
  14  -1   1    1.00    1.80
 -15   1  -1    2.20    2.30
 -15   1  -1   -2.30    2.00
  15  -1   1   -0.20    2.30
  15  -1   1   -0.50    2.00
  15  -1   1    0.20    2.00
  15  -1   1    2.10    2.30
 -16   1  -1    2.40    2.50
 -16   1  -1    2.20    2.60
  16  -1   1    4.40    2.60
  16  -1   1    4.50    2.40
  16  -1   1    1.30    2.70
  16  -1   1    2.80    2.80
 -17   1  -1   -3.40    2.40
 -17   1  -1   -0.50    2.50
  17  -1   1   -1.60    2.40
  17  -1   1    0.70    3.20
  17  -1   1   -4.30    3.10
  17  -1   1   -2.40    2.30
  17   0  -1   -3.30    2.50
  17   0  -1   -5.60    2.80
  17   0  -1   -2.00    2.50
 -17   0   1    0.60    2.90
  16   0  -1    7.20    3.10
  16   0  -1    3.20    3.40
  16   0  -1    2.20    2.40
  16   0  -1    4.80    2.70
 -16   0   1    3.90    2.70
 -16   0   1    6.50    2.70
  15   0  -1    1.20    2.20
  15   0  -1    1.30    2.30
  15   0  -1    1.10    2.50
  15   0  -1   -0.50    2.80
 -15   0   1    1.80    2.40
 -15   0   1    1.30    2.30
  14   0  -1    3.30    2.30
  14   0  -1   -0.10    1.90
  14   0  -1   -1.40    2.50
  14   0  -1   -1.20    2.10
 -14   0   1   -1.10    2.00
 -14   0   1    1.20    2.20
  13   0  -1   10.00    2.30
  13   0  -1    7.80    3.00
  13   0  -1    3.80    2.70
  13   0  -1   13.80    2.70
 -13   0   1   15.00    2.70
 -13   0   1   11.90    2.40
  12   0  -1   13.50    2.90
  12   0  -1   11.90    2.50
  12   0  -1   13.90    2.30
  12   0  -1   12.60    2.50
 -12   0   1   12.10    2.30
 -12   0   1    9.50    2.30
  11   0  -1   32.00    3.10
  11   0  -1   37.40    3.70
  11   0  -1   36.10    3.10
  11   0  -1   31.70    3.40
 -11   0   1   35.40    3.00
 -11   0   1   31.40    3.00
  10   0  -1    4.20    1.90
  10   0  -1    3.50    1.60
  10   0  -1    1.40    1.30
 -10   0   1    5.00    1.60
 -10   0   1    4.10    1.60
   9   0  -1    7.10    0.90
   9   0  -1    5.90    1.80
   9   0  -1    6.20    1.60
   9   0  -1    5.60    1.40
   9   0  -1    5.10    1.70
   9   0  -1    1.60    0.80
   9   0  -1    5.90    1.80
  -9   0   1    6.70    0.70
  -9   0   1    4.10    1.50
  -9   0   1    6.60    1.50
   8   0  -1   25.40    2.20
   8   0  -1   18.40    2.20
   8   0  -1   12.50    1.80
   8   0  -1   13.90    1.80
   8   0  -1   17.20    1.30
   8   0  -1   23.50    2.50
   8   0  -1   23.50    2.00
  -8   0   1   17.60    1.80
  -8   0   1   20.40    1.20
  -8   0   1   21.00    2.00
   7   0  -1    9.10    1.70
   7   0  -1    7.40    1.50
   7   0  -1    9.90    0.90
   7   0  -1    7.40    1.20
   7   0  -1    9.40    1.40
   7   0  -1    6.80    1.60
   7   0  -1    4.90    1.30
  -7   0   1    6.40    1.30
  -7   0   1   11.00    0.90
  -7   0   1    7.40    1.40
   6   0  -1   27.40    2.10
   6   0  -1   28.90    2.20
   6   0  -1   31.40    1.50
   6   0  -1   33.10    2.40
   6   0  -1   30.90    2.10
   6   0  -1   30.40    2.50
  -6   0   1   33.80    1.70
  -6   0   1   34.00    2.10
  -6   0   1   29.50    2.10
   5   0  -1    0.80    0.80
   5   0  -1    1.40    0.80
   5   0  -1    3.90    1.30
   5   0  -1    1.50    0.60
   5   0  -1    0.20    0.70
   5   0  -1   -0.20    0.90
   5   0  -1    2.10    1.20
  -5   0   1    1.80    1.00
  -5   0   1    1.50    0.90
  -5   0   1    1.10    0.70
   4   0  -1    9.80    1.40
   4   0  -1   14.40    1.00
   4   0  -1   13.90    1.40
   4   0  -1   13.70    1.20
   4   0  -1   12.00    1.40
   4   0  -1   14.90    1.30
   4   0  -1   13.50    1.30
  -4   0   1   13.60    1.20
  -4   0   1   14.20    1.10
  -4   0   1   14.50    1.30
   3   0  -1   58.69    2.70
   3   0  -1   56.29    2.50
   3   0  -1   57.59    2.80
   3   0  -1   57.29    2.70
   3   0  -1   58.89    2.80
   3   0  -1   56.39    2.70
   3   0  -1   57.69    2.30
  -3   0   1   59.69    2.40
  -3   0   1   61.49    2.60
  -3   0   1   60.69    2.50
   2   0  -1    0.70    0.40
   2   0  -1    0.20    0.70
   2   0  -1   -0.30    0.50
   2   0  -1    0.00    0.70
   2   0  -1    1.10    0.40
   2   0  -1    0.20    0.50
   2   0  -1    0.00    0.60
  -2   0   1    0.90    0.60
  -2   0   1    0.20    0.50
  -2   0   1    0.30    0.60
   1   0  -1   -0.70    0.30
   1   0  -1   -0.40    0.40
   1   0  -1   -0.10    0.40
   1   0  -1   -0.80    0.30
   1   0  -1   -0.40    0.40
  -1   0   1   -0.50    0.30
  -1   0   1   -1.10    0.30
  -1   0   1   -0.60    0.40
  -1   0   1   -0.60    0.40
  -1   0   1   -1.20    0.40
   0   0  -1   -0.60    0.20
   0   0  -1   -0.70    0.20
   0   0  -1   -0.80    0.20
   0   0  -1   -0.70    0.10
   0   0  -1   -0.70    0.10
   0   0   1   -0.50    0.10
   0   0   1   -0.80    0.20
   0   0   1   -0.70    0.10
   0   0   1   -0.60    0.10
   0   0   1   -0.50    0.20
  -1   0  -1   -5.40    0.30
  -1   0  -1   -5.30    0.40
  -1   0  -1   -6.60    0.30
  -1   0  -1   -5.30    0.40
   1   0   1   -5.30    0.40
   1   0   1   -5.60    0.40
   1   0   1   -5.40    0.30
   1   0   1   -6.00    0.40
  -2   0  -1   -0.80    0.50
  -2   0  -1   -0.50    0.60
  -2   0  -1   -0.20    0.60
  -2   0  -1   -1.00    0.50
   2   0   1   -0.50    0.40
   2   0   1    0.50    0.60
   2   0   1   -0.30    0.60
   2   0   1   -0.60    0.30
   2   0   1   -0.20    0.50
   2   0   1   -1.30    0.60
  -3   0  -1   -0.10    0.70
  -3   0  -1    0.60    0.70
  -3   0  -1   -0.70    0.80
   3   0   1   -0.40    0.40
   3   0   1    0.40    0.70
   3   0   1    0.20    0.50
   3   0   1    0.50    0.80
   3   0   1    0.40    0.80
   3   0   1    0.90    0.80
  -4   0  -1    2.00    1.00
  -4   0  -1    1.90    0.90
  -4   0  -1    1.60    0.80
   4   0   1    2.20    0.60
   4   0   1    2.30    0.80
   4   0   1    1.80    0.40
   4   0   1    1.20    0.80
   4   0   1    1.80    1.00
   4   0   1    3.40    1.00
  -5   0  -1    3.50    0.90
  -5   0  -1    3.10    1.00
   5   0   1    2.50    1.10
   5   0   1    3.40    0.80
   5   0   1    4.20    0.50
   5   0   1   -0.40    0.70
   5   0   1    4.60    1.00
   5   0   1    2.90    0.60
   5   0   1    3.30    1.20
  -6   0  -1   27.40    2.10
  -6   0  -1   25.80    1.90
   6   0   1   29.80    2.30
   6   0   1   32.20    2.30
   6   0   1   29.00    1.30
   6   0   1   26.70    2.20
   6   0   1   19.40    1.80
   6   0   1   25.90    1.90
   6   0   1   29.00    1.40
  -7   0  -1   -0.60    1.00
  -7   0  -1   -1.20    0.60
  -7   0  -1    2.60    1.00
   7   0   1   -1.50    1.10
   7   0   1    0.40    0.80
   7   0   1   -0.70    0.50
   7   0   1    0.20    1.10
   7   0   1    0.30    0.60
   7   0   1    0.30    1.30
   7   0   1    1.60    1.20
  -8   0  -1    4.90    0.60
  -8   0  -1    4.30    1.30
  -8   0  -1    2.10    1.20
   8   0   1    3.40    1.50
   8   0   1    3.30    1.10
   8   0   1    4.30    0.80
   8   0   1    1.40    1.30
   8   0   1    3.50    1.30
   8   0   1    5.00    1.30
  -9   0  -1   -0.50    1.20
  -9   0  -1    2.70    1.40
   9   0   1   -0.30    0.70
   9   0   1    1.40    0.90
   9   0   1    2.00    1.20
   9   0   1    1.00    1.40
   9   0   1    1.40    1.30
   9   0   1    2.50    1.50
   9   0   1   -0.20    1.50
 -10   0  -1    4.20    1.50
 -10   0  -1    5.20    1.60
  10   0   1    4.10    1.80
  10   0   1    3.70    0.90
  10   0   1    3.40    1.50
  10   0   1    5.30    1.40
  10   0   1   -0.10    0.90
 -11   0  -1   77.49    4.50
 -11   0  -1   74.49    4.30
  11   0   1   78.19    4.80
  11   0   1   75.79    4.40
  11   0   1   79.99    4.50
  11   0   1   73.69    4.80
 -12   0  -1   16.40    2.40
 -12   0  -1   17.60    2.60
  12   0   1   13.20    2.60
  12   0   1   17.60    2.40
  12   0   1   18.00    2.70
  12   0   1   18.80    2.60
 -13   0  -1   -0.50    1.70
 -13   0  -1   -0.30    1.80
  13   0   1   -0.20    1.90
  13   0   1   -3.60    2.20
  13   0   1   -0.10    2.10
  13   0   1    2.80    1.80
 -14   0  -1    8.90    2.40
 -14   0  -1    5.60    2.40
  14   0   1    6.40    2.50
  14   0   1    7.70    2.30
  14   0   1    5.00    2.50
  14   0   1    7.00    2.80
 -15   0  -1   -1.30    2.00
 -15   0  -1   -0.30    2.30
  15   0   1   -3.10    2.50
  15   0   1    2.20    2.60
  15   0   1   -0.40    2.00
  15   0   1    0.30    2.10
 -16   0  -1    2.80    2.40
 -16   0  -1   -0.90    2.40
  16   0   1   -7.50    2.70
  16   0   1    1.60    2.40
  16   0   1    2.00    2.30
  16   0   1    1.40    2.70
 -17   0  -1   -3.60    2.50
 -17   0  -1    1.10    2.70
  17   0   1   -2.50    2.80
  17   0   1   -1.70    2.40
  17   0   1    1.20    2.60
  17   0   1   -4.30    3.40
  16  -1  -1   -1.40    2.60
  16  -1  -1    4.30    3.40
  16  -1  -1   -0.10    2.20
  16  -1  -1   -1.90    2.30
 -16   1   1   -3.70    2.30
 -16   1   1    3.20    2.70
  15  -1  -1   -0.20    2.00
  15  -1  -1   -2.20    1.90
  15  -1  -1    3.80    3.00
  15  -1  -1    0.50    2.20
 -15   1   1   -0.60    2.20
 -15   1   1   -0.20    2.20
  14  -1  -1    5.50    2.20
  14  -1  -1    5.60    2.90
  14  -1  -1    8.80    2.40
  14  -1  -1    5.90    2.30
 -14   1   1    6.30    2.40
 -14   1   1    6.30    2.30
  13  -1  -1   72.19    4.90
  13  -1  -1   72.99    5.40
  13  -1  -1   70.89    4.80
  13  -1  -1   72.49    5.60
 -13   1   1   68.29    4.80
 -13   1   1   73.49    4.80
  12  -1  -1   -0.30    1.80
  12  -1  -1   -0.60    2.10
  12  -1  -1   -0.80    1.50
  12  -1  -1    0.60    2.00
 -12   1   1   -0.90    1.80
 -12   1   1    0.70    1.60
  11  -1  -1   73.89    4.40
  11  -1  -1   64.59    4.60
  11  -1  -1   73.09    4.80
  11  -1  -1   71.49    4.30
 -11   1   1   72.09    4.50
 -11   1   1   70.49    4.20
  10  -1  -1   50.39    3.30
  10  -1  -1   47.70    3.80
  10  -1  -1   34.80    3.20
  10  -1  -1   45.10    3.20
 -10   1   1   46.20    3.40
 -10   1   1   42.90    3.00
   9  -1  -1    2.20    1.40
   9  -1  -1    1.30    1.10
   9  -1  -1    1.10    1.50
   9  -1  -1    0.80    1.00
  -9   1   1    1.50    1.40
  -9   1   1    2.50    1.30
   8  -1  -1    3.10    1.20
   8  -1  -1    1.10    1.00
   8  -1  -1   -0.40    1.20
   8  -1  -1    1.80    1.40
   8  -1  -1   -0.10    1.30
   8  -1  -1    1.10    1.30
  -8   1   1    1.30    1.10
  -8   1   1   -0.30    1.10
   7  -1  -1   87.49    4.60
   7  -1  -1   92.79    4.20
   7  -1  -1   94.09    4.20
   7  -1  -1   93.49    4.30
   7  -1  -1   92.19    4.30
   7  -1  -1   86.79    4.50
  -7   1   1   87.69    4.00
  -7   1   1   83.69    4.10
   6  -1  -1    0.00    0.90
   6  -1  -1    0.70    1.20
   6  -1  -1    1.10    0.80
   6  -1  -1    1.00    1.00
   6  -1  -1   -0.50    1.20
  -6   1   1    0.70    0.90
  -6   1   1   -0.20    1.00
   5  -1  -1   24.80    1.60
   5  -1  -1   27.10    2.10
   5  -1  -1   20.90    1.80
   5  -1  -1   26.30    2.00
  -5   1   1   23.80    1.70
  -5   1   1   22.50    1.80
   4  -1  -1    0.70    0.60
   4  -1  -1    1.30    0.80
   4  -1  -1    0.20    0.50
   4  -1  -1    0.70    1.00
   4  -1  -1   -0.30    0.90
  -4   1   1    1.80    0.90
  -4   1   1    0.00    0.70
   3  -1  -1  813.42   27.50
   3  -1  -1  792.42   27.50
   3  -1  -1  803.12   27.20
  -3   1   1  784.22   27.20
  -3   1   1  797.32   27.20
  -3   1   1  800.22   27.40
   2  -1  -1   42.00    1.80
   2  -1  -1   40.60    1.90
   2  -1  -1   38.60    1.80
  -2   1   1   39.60    1.90
  -2   1   1   39.30    1.70
  -2   1   1   40.60    1.50
  -2   1   1   40.50    1.80
   1  -1  -1   15.50    1.10
  -1   1   1   16.80    1.20
  -1   1   1   16.00    1.20
  -1   1   1   21.80    1.10
   0  -1  -1  386.56   13.70
   0   1   1  311.87   12.80
   0   1   1  378.36   12.40
  -1  -1  -1  756.12   25.40
  -1  -1  -1  782.32   30.00
  -1  -1  -1  767.62   25.60
   1   1   1  739.33   25.40
   1   1   1  748.13   25.60
   1   1   1  747.73   26.00
   1   1   1  794.12   27.00
   1   1   1  695.13   30.00
  -2  -1  -1  291.17    9.80
  -2  -1  -1  273.57    9.90
   2   1   1  298.67   10.30
   2   1   1  284.07   10.00
   2   1   1  287.77    9.90
   2   1   1  291.37   10.80
   2   1   1  288.37   11.00
   2   1   1  285.87   10.00
   2   1   1  270.47   11.50
  -3  -1  -1  602.64   20.80
  -3  -1  -1  610.64   20.70
   3   1   1  601.94   21.00
   3   1   1  582.74   22.80
   3   1   1  617.14   24.30
   3   1   1  595.54   23.20
   3   1   1  616.94   21.60
   3   1   1  605.14   20.90
   3   1   1  621.54   20.90
   3   1   1  597.84   20.70
  -4  -1  -1 1071.19   37.50
  -4  -1  -1 1075.69   37.80
   4   1   1 1096.99   38.00
   4   1   1 1138.39   41.40
   4   1   1 1104.19   42.20
   4   1   1 1109.69   44.20
   4   1   1 1098.69   37.90
   4   1   1 1143.89   39.40
   4   1   1 1108.99   37.60
   4   1   1 1101.09   38.20
  -5  -1  -1   82.69    3.60
  -5  -1  -1   81.59    3.50
   5   1   1   80.99    3.60
   5   1   1   86.69    3.30
   5   1   1   83.49    3.80
   5   1   1   85.19    3.90
   5   1   1   84.99    3.80
   5   1   1   83.59    3.30
   5   1   1   84.49    3.90
  -6  -1  -1  111.69    4.70
  -6  -1  -1  117.19    4.70
   6   1   1  112.19    4.80
   6   1   1  113.29    4.70
   6   1   1  116.59    4.30
   6   1   1  119.39    5.20
   6   1   1  114.59    5.00
   6   1   1  118.89    4.40
   6   1   1  101.19    5.10
   6   1   1  107.99    5.10
  -7  -1  -1  223.78    8.70
  -7  -1  -1  228.28    8.50
   7   1   1  229.98    9.60
   7   1   1  228.18    8.20
   7   1   1  226.78    9.70
   7   1   1  220.78    9.50
   7   1   1  224.38    8.60
   7   1   1  223.38    8.60
   7   1   1  224.28    8.40
   7   1   1  229.88    8.80
  -8  -1  -1    2.30    1.10
  -8  -1  -1    1.80    0.80
  -8  -1  -1    0.10    1.20
   8   1   1    1.90    0.80
   8   1   1    1.50    1.10
   8   1   1    0.30    1.00
   8   1   1    0.40    1.30
   8   1   1    0.40    1.10
   8   1   1    1.80    0.80
   8   1   1    2.40    1.20
   8   1   1    1.20    1.40
  -9  -1  -1   46.60    3.00
  -9  -1  -1   44.40    2.90
  -9  -1  -1   45.90    2.20
   9   1   1   43.30    2.90
   9   1   1   43.40    2.20
   9   1   1   42.60    3.20
   9   1   1   45.50    3.10
   9   1   1   43.60    3.30
   9   1   1   44.40    3.00
   9   1   1   44.90    2.20
   9   1   1   49.10    3.30
 -10  -1  -1   61.39    3.60
 -10  -1  -1   57.09    3.40
 -10  -1  -1   62.39    2.70
  10   1   1   58.09    2.70
  10   1   1   58.79    4.00
  10   1   1   54.49    3.90
  10   1   1   58.49    3.50
  10   1   1   53.99    2.60
  10   1   1   60.39    3.70
  10   1   1   56.39    4.00
  10   1   1   55.39    3.70
 -11  -1  -1   40.70    3.20
 -11  -1  -1   41.80    3.10
  11   1   1   42.40    3.70
  11   1   1   40.80    3.40
  11   1   1   41.20    3.30
  11   1   1   42.30    3.20
 -12  -1  -1   30.30    2.90
 -12  -1  -1   33.10    3.10
  12   1   1   28.70    3.30
  12   1   1   28.60    3.40
  12   1   1   32.50    3.10
  12   1   1   31.90    3.00
 -13  -1  -1   61.49    4.30
 -13  -1  -1   53.19    4.30
  13   1   1   55.79    4.60
  13   1   1   63.89    4.50
  13   1   1   65.29    4.50
  13   1   1   65.59    5.00
 -14  -1  -1   -2.20    1.80
 -14  -1  -1   -1.00    2.10
  14   1   1    1.80    2.60
  14   1   1   -2.80    2.00
  14   1   1    1.00    2.00
  14   1   1   -0.60    2.10
 -15  -1  -1    3.70    2.50
 -15  -1  -1    2.80    2.10
  15   1   1    4.40    2.90
  15   1   1    2.10    2.30
  15   1   1    2.20    2.20
  15   1   1    3.70    2.40
 -16  -1  -1    0.50    2.50
 -16  -1  -1    3.20    2.40
  16   1   1   -0.80    2.30
  16   1   1    1.20    2.40
  16   1   1    3.60    3.10
  16   1   1    0.70    2.30
 -17  -1  -1    2.10    2.80
  17   1   1    2.00    3.50
  17   1   1    2.30    3.10
  17   1   1   -0.60    2.40
  17   1   1    0.90    2.40
  16  -2  -1    1.90    2.50
  16  -2  -1    6.00    3.20
  16  -2  -1    3.60    2.90
  16  -2  -1   -3.70    2.10
 -16   2   1   -1.40    2.60
 -16   2   1    3.10    2.60
  15  -2  -1   -6.30    2.60
  15  -2  -1   -2.40    2.00
  15  -2  -1   -0.10    2.00
  15  -2  -1    1.10    2.30
 -15   2   1    0.20    2.40
 -15   2   1    1.30    2.40
  14  -2  -1    5.30    2.30
  14  -2  -1    1.10    2.40
  14  -2  -1    3.70    2.00
  14  -2  -1    4.80    2.80
 -14   2   1    3.10    2.40
 -14   2   1    6.60    2.30
  13  -2  -1    0.00    2.10
  13  -2  -1   -0.90    1.60
  13  -2  -1    1.50    2.00
  13  -2  -1    4.80    2.20
 -13   2   1   -1.80    1.80
 -13   2   1   -1.20    2.00
  12  -2  -1    0.50    1.90
  12  -2  -1    2.10    1.60
  12  -2  -1    2.30    2.20
  12  -2  -1   -1.20    2.10
 -12   2   1    3.20    1.90
 -12   2   1    1.60    1.90
  11  -2  -1   34.20    3.60
  11  -2  -1   33.20    3.00
  11  -2  -1   29.60    3.50
  11  -2  -1   23.00    2.80
 -11   2   1   32.30    3.10
 -11   2   1   34.60    3.00
  10  -2  -1    8.40    1.90
  10  -2  -1    8.60    2.20
  10  -2  -1   10.00    1.70
  10  -2  -1    6.60    1.80
 -10   2   1    6.80    1.70
 -10   2   1    6.50    1.80
   9  -2  -1    3.70    1.80
   9  -2  -1    3.60    1.70
   9  -2  -1    2.10    1.40
   9  -2  -1    2.20    1.10
  -9   2   1    0.60    1.20
  -9   2   1   -0.50    1.30
   8  -2  -1   21.10    2.40
   8  -2  -1   20.70    1.90
   8  -2  -1   18.40    1.90
  -8   2   1   20.20    1.90
  -8   2   1   20.00    2.00
   7  -2  -1    1.10    0.80
   7  -2  -1    1.20    1.20
   7  -2  -1    0.50    1.00
  -7   2   1    1.80    1.00
  -7   2   1    0.80    1.00
   6  -2  -1    1.20    0.70
   6  -2  -1   -0.70    0.90
   6  -2  -1    0.60    1.00
  -6   2   1    0.70    1.00
  -6   2   1    0.60    0.90
   5  -2  -1   10.70    1.20
   5  -2  -1   14.20    1.60
  -5   2   1   11.90    1.20
  -5   2   1   11.50    1.30
  -5   2   1   11.50    1.40
  -4   2   1   11.50    1.30
  -4   2   1   12.50    1.40
  -4   2   1   11.80    1.10
  -4   2   1   11.30    1.20
   3  -2  -1   31.00    1.70
   3  -2  -1   40.30    2.20
  -3   2   1   42.40    1.50
  -3   2   1   37.60    2.00
  -3   2   1   38.90    1.90
  -3   2   1   33.50    1.70
  -3   2   1   36.20    2.10
   2  -2  -1   75.39    3.40
  -2   2   1   69.99    2.80
  -2   2   1   71.59    2.70
  -2   2   1   72.99    2.90
  -2   2   1   73.39    2.70
  -2   2   1   71.29    3.30
   1  -2  -1   -1.20    0.60
   1  -2  -1   -1.00    0.30
  -1   2   1   -1.50    0.60
  -1   2   1   -0.30    0.60
  -1   2   1   -0.40    0.50
  -1   2   1   -1.00    0.50
  -1   2   1   -0.90    0.30
  -1   2   1   -0.80    0.20
  -1   2   1   -0.40    0.40
  -1   2   1   -0.90    0.30
   0  -2  -1   18.40    1.10
   0   2   1   20.20    1.10
   0   2   1   20.70    1.00
   0   2   1   18.00    1.00
  -1  -2  -1    1.20    0.30
   1   2   1    0.50    0.30
   1   2   1    0.60    0.30
   1   2   1    1.00    0.40
   1   2   1   -0.30    0.20
  -2  -2  -1   13.20    0.90
  -2  -2  -1   15.30    1.00
  -2  -2  -1   13.00    1.00
   2   2   1   13.00    1.10
   2   2   1   14.60    1.10
   2   2   1   13.90    1.10
   2   2   1   14.00    0.90
   2   2   1   14.50    0.90
   2   2   1   14.20    1.10
   2   2   1   14.00    1.10
   2   2   1   12.10    0.90
  -3  -2  -1    1.30    0.60
  -3  -2  -1    3.10    0.80
   3   2   1    2.90    0.80
   3   2   1    2.40    0.90
   3   2   1    2.90    0.80
   3   2   1    2.90    0.60
   3   2   1    4.10    0.90
   3   2   1    3.20    0.80
   3   2   1    2.60    0.90
  -4  -2  -1    5.90    1.10
  -4  -2  -1    9.30    1.00
   4   2   1    9.10    1.10
   4   2   1    8.20    1.00
   4   2   1    8.80    1.00
   4   2   1    9.70    1.10
   4   2   1    8.70    1.20
   4   2   1    8.70    1.30
   4   2   1    9.80    1.30
  -5  -2  -1    0.20    0.90
  -5  -2  -1   -0.30    0.80
   5   2   1    0.70    1.10
   5   2   1    1.30    0.90
   5   2   1    1.60    0.80
   5   2   1    1.40    0.80
   5   2   1    0.60    0.70
   5   2   1    0.30    0.80
   5   2   1    0.20    0.90
   5   2   1    0.30    1.20
  -6  -2  -1   19.70    1.60
  -6  -2  -1   23.00    1.80
   6   2   1   20.70    1.50
   6   2   1   18.50    1.80
   6   2   1   21.30    1.50
   6   2   1   21.30    1.80
   6   2   1   21.20    2.00
   6   2   1   23.70    1.90
   6   2   1   21.70    1.70
  -7  -2  -1    3.90    1.20
  -7  -2  -1    1.70    1.10
   7   2   1    2.20    0.90
   7   2   1    1.50    1.10
   7   2   1    1.20    1.00
   7   2   1    4.30    1.50
   7   2   1    2.10    1.10
   7   2   1    2.10    1.30
   7   2   1    3.60    1.30
   7   2   1    2.70    1.00
  -8  -2  -1    2.40    1.10
  -8  -2  -1    0.70    1.20
   8   2   1   -1.00    1.20
   8   2   1    0.80    1.10
   8   2   1    0.00    0.80
   8   2   1    1.20    0.90
   8   2   1    2.80    1.50
   8   2   1   -2.20    1.40
   8   2   1   -0.60    1.30
   8   2   1    0.80    1.00
  -9  -2  -1    5.20    1.40
  -9  -2  -1    8.30    1.60
  -9  -2  -1    7.20    1.10
   9   2   1    7.20    1.10
   9   2   1    7.00    1.50
   9   2   1    5.60    1.40
   9   2   1    8.60    1.80
   9   2   1    6.40    1.10
   9   2   1    8.10    1.80
   9   2   1    7.30    1.60
   9   2   1    7.80    1.90
 -10  -2  -1    0.20    1.30
 -10  -2  -1    1.70    1.40
 -10  -2  -1    3.60    1.00
  10   2   1   -0.50    1.60
  10   2   1    0.60    1.00
  10   2   1    1.20    1.60
  10   2   1    2.60    1.80
  10   2   1    1.60    1.30
  10   2   1    2.00    1.10
  10   2   1    3.90    1.80
  10   2   1    2.10    1.40
 -11  -2  -1   27.90    2.70
 -11  -2  -1   23.90    2.60
  11   2   1   29.30    2.80
  11   2   1   32.10    3.20
  11   2   1   33.50    2.20
  11   2   1   36.90    3.60
  11   2   1   32.50    2.90
 -12  -2  -1    1.60    1.80
 -12  -2  -1    4.20    1.80
  12   2   1    2.80    1.80
  12   2   1    4.60    2.30
  12   2   1    1.10    2.10
  12   2   1    1.90    1.90
 -13  -2  -1  157.58    7.40
 -13  -2  -1  155.38    7.10
  13   2   1  164.28    8.30
  13   2   1  147.39    7.30
  13   2   1  151.68    8.00
  13   2   1  151.28    7.90
 -14  -2  -1    0.20    2.00
 -14  -2  -1    4.50    2.30
  14   2   1    2.30    2.10
  14   2   1    5.40    2.30
  14   2   1   -0.60    2.50
  14   2   1    2.20    2.60
 -15  -2  -1    1.10    2.40
 -15  -2  -1    5.80    2.30
  15   2   1    2.00    2.70
  15   2   1    0.90    2.20
  15   2   1   -2.50    2.00
  15   2   1    2.10    2.30
 -16  -2  -1    0.90    2.40
  16   2   1    0.80    2.20
  16   2   1    3.50    2.40
  16   2   1    2.70    3.00
  16   2   1   -2.50    2.80
  17   2   1    4.80    3.40
  17   2   1    0.40    3.40
  17   2   1    1.10    2.40
  16  -3  -1    7.20    2.80
  16  -3  -1    6.30    3.50
  16  -3  -1    3.70    2.30
  16  -3  -1    1.40    3.20
 -16   3   1    5.80    2.80
 -16   3   1    7.30    2.80
  15  -3  -1   -3.90    2.20
  15  -3  -1    1.20    2.00
  15  -3  -1   -0.80    2.30
  15  -3  -1    3.80    2.90
 -15   3   1    1.60    2.40
 -15   3   1   -1.10    2.20
  14  -3  -1   -1.20    2.00
  14  -3  -1    1.20    1.80
  14  -3  -1   -1.70    2.30
  14  -3  -1    3.00    2.80
 -14   3   1   -1.50    2.30
 -14   3   1    0.50    2.10
  13  -3  -1    5.40    1.90
  13  -3  -1   11.10    3.00
  13  -3  -1    5.80    2.70
  13  -3  -1    3.60    2.20
 -13   3   1    6.40    2.30
 -13   3   1    5.00    2.20
  12  -3  -1    1.30    2.20
  12  -3  -1   -2.90    2.10
  12  -3  -1    0.20    1.50
  12  -3  -1    0.30    1.90
 -12   3   1    0.50    1.80
 -12   3   1   -0.10    1.90
  11  -3  -1    1.40    2.10
  11  -3  -1    3.30    1.50
  11  -3  -1    2.90    1.80
  11  -3  -1   -0.80    2.00
 -11   3   1    0.80    1.70
 -11   3   1    1.30    1.80
  10  -3  -1   14.00    2.60
  10  -3  -1   14.50    2.10
  10  -3  -1   14.00    1.80
  10  -3  -1   13.90    2.40
 -10   3   1   13.50    2.00
 -10   3   1   10.60    2.00
   9  -3  -1    4.90    1.60
   9  -3  -1    6.00    1.30
   9  -3  -1    5.80    1.60
  -9   3   1    5.10    1.40
  -9   3   1    6.90    1.60
   8  -3  -1  124.49    5.40
   8  -3  -1  125.69    5.70
  -8   3   1  123.29    5.40
  -8   3   1  119.59    5.30
   7  -3  -1   63.99    3.30
   7  -3  -1   62.49    3.70
  -7   3   1   68.29    3.20
  -7   3   1   65.79    3.30
   6  -3  -1  111.19    4.60
  -6   3   1  115.89    4.80
  -6   3   1  102.59    4.40
  -6   3   1  112.69    4.70
  -6   3   1  104.89    4.60
   5  -3  -1  631.24   22.50
  -5   3   1  619.34   22.50
  -5   3   1  689.73   22.60
  -5   3   1  657.43   22.40
  -5   3   1  630.34   22.20
   4  -3  -1   14.70    1.20
   4  -3  -1   17.50    1.00
   4  -3  -1   16.20    1.70
   4  -3  -1   20.30    1.00
  -4   3   1   16.90    1.30
  -4   3   1   16.10    1.00
  -4   3   1   16.60    1.50
  -4   3   1   18.90    1.50
   3  -3  -1    0.90    1.00
   3  -3  -1    0.00    0.20
  -3   3   1   -0.20    0.60
  -3   3   1    0.00    0.30
  -3   3   1    0.30    0.80
  -3   3   1   -1.40    0.70
  -3   3   1    0.30    0.30
  -3   3   1    0.00    0.60
  -3   3   1    0.20    0.60
   2  -3  -1   75.29    2.80
   2  -3  -1   74.99    3.50
  -2   3   1   79.59    3.50
  -2   3   1   72.09    2.70
  -2   3   1   75.59    2.90
  -2   3   1   77.09    3.00
  -2   3   1   61.49    2.70
  -2   3   1   75.69    2.90
  -2   3   1   75.89    2.80
   1  -3  -1  977.50   37.10
   1  -3  -1  970.30   33.10
  -1   3   1  981.00   34.70
  -1   3   1  987.40   33.60
  -1   3   1  959.80   37.10
  -1   3   1  966.60   36.30
  -1   3   1  958.80   33.00
  -1   3   1  976.70   33.00
   0   3   1  297.37   11.60
   0   3   1  304.17   10.80
   0   3   1  310.07   11.20
   0   3   1  307.87   11.80
   1   3   1 1280.37   40.90
   1   3   1 1288.37   44.90
   1   3   1 1058.29   43.00
   1   3   1 1146.39   40.90
   1   3   1 1183.38   41.70
   1   3   1 1274.37   45.80
  -2  -3  -1 3485.05  113.99
   2   3   1 3273.37  114.89
   2   3   1 3264.87  114.09
   2   3   1 3450.65  125.29
   2   3   1 3363.66  116.79
   2   3   1 3479.75  121.09
   2   3   1 3387.06  114.59
   2   3   1 3332.87  128.19
  -3  -3  -1 3889.91  130.79
  -3  -3  -1 3834.32  130.29
  -3  -3  -1 3913.61  153.28
   3   3   1 3934.41  153.38
   3   3   1 3672.63  132.99
   3   3   1 3657.73  129.69
   3   3   1 3880.51  142.79
   3   3   1 3911.61  130.89
   3   3   1 3898.91  137.09
   3   3   1 3953.80  146.29
  -4  -3  -1 2528.35   85.29
  -4  -3  -1 2511.55   85.99
   4   3   1 2559.54   93.99
   4   3   1 2614.24   95.89
   4   3   1 2476.15  100.59
   4   3   1 2591.24   89.99
   4   3   1 2538.15   86.09
   4   3   1 2478.75   85.39
   4   3   1 2462.15   87.09
  -5  -3  -1  211.68    7.50
  -5  -3  -1  199.48    7.40
   5   3   1  209.98    7.50
   5   3   1  190.28    7.50
   5   3   1  204.18    7.70
   5   3   1  208.88    7.70
   5   3   1  178.88    8.10
   5   3   1  210.08    8.20
   5   3   1  197.18    7.50
  -6  -3  -1   13.90    1.50
  -6  -3  -1   16.40    1.50
   6   3   1   15.10    1.70
   6   3   1   16.30    1.60
   6   3   1   17.70    1.50
   6   3   1   18.00    1.90
   6   3   1   16.40    1.80
   6   3   1   14.90    1.40
   6   3   1   17.50    1.60
   6   3   1   15.40    1.40
  -7  -3  -1   45.30    2.50
  -7  -3  -1   41.40    2.60
   7   3   1   42.30    2.90
   7   3   1   39.10    2.30
   7   3   1   40.60    2.70
   7   3   1   36.10    2.90
   7   3   1   44.80    2.50
   7   3   1   43.30    2.40
   7   3   1   40.00    2.70
  -8  -3  -1   54.79    3.10
  -8  -3  -1   53.89    3.00
   8   3   1   54.49    2.80
   8   3   1   55.19    3.40
   8   3   1   50.49    3.50
   8   3   1   61.69    3.40
   8   3   1   53.69    3.40
   8   3   1   57.19    2.90
  -9  -3  -1  279.07   10.60
  -9  -3  -1  273.07   10.70
  -9  -3  -1  278.37   10.70
   9   3   1  287.17   10.80
   9   3   1  278.47   10.40
   9   3   1  278.37   12.00
   9   3   1  293.97   11.00
   9   3   1  258.57   11.70
   9   3   1  282.67   11.90
   9   3   1  300.07   10.80
   9   3   1  278.07   10.70
 -10  -3  -1   20.20    2.30
 -10  -3  -1   17.40    1.70
 -10  -3  -1   22.30    2.20
  10   3   1   20.50    1.80
  10   3   1   19.90    2.50
  10   3   1   22.60    2.80
  10   3   1   21.30    2.50
  10   3   1   21.10    2.30
  10   3   1   21.80    1.90
  10   3   1   19.10    2.40
 -11  -3  -1    5.50    1.20
 -11  -3  -1    9.40    2.00
 -11  -3  -1    5.30    1.70
  11   3   1    8.70    2.30
  11   3   1   10.10    2.00
  11   3   1    7.50    1.70
  11   3   1    6.60    1.40
  11   3   1   11.40    2.20
  11   3   1    7.00    2.00
  11   3   1    8.20    1.50
  11   3   1    8.20    2.30
 -12  -3  -1    1.20    1.80
 -12  -3  -1    3.40    1.80
  12   3   1    6.30    2.10
  12   3   1    5.70    2.20
  12   3   1    0.60    2.10
  12   3   1    4.70    1.80
 -13  -3  -1  140.09    7.10
 -13  -3  -1  139.39    6.80
  13   3   1  150.58    7.10
  13   3   1  148.89    7.80
  13   3   1  144.59    7.90
  13   3   1  135.09    7.30
 -14  -3  -1   92.39    5.60
 -14  -3  -1   96.39    5.80
  14   3   1   95.79    5.60
  14   3   1   98.29    6.50
  14   3   1   78.79    6.20
  14   3   1   93.09    5.70
 -15  -3  -1   14.70    2.80
 -15  -3  -1   19.20    3.10
  15   3   1   12.90    3.50
  15   3   1   13.20    2.60
  15   3   1   11.10    3.30
  15   3   1   16.20    3.00
  16   3   1   66.09    6.00
  16   3   1   69.99    6.00
  16   3   1   56.89    5.00
  17   3   1   11.40    3.90
  17   3   1    7.80    2.80
  17   3   1    9.80    3.80
  15  -4  -1   -0.10    3.20
  15  -4  -1    3.40    2.40
  15  -4  -1    4.90    2.20
  15  -4  -1    1.70    2.80
 -15   4   1    5.20    2.50
 -15   4   1    0.50    2.60
  14  -4  -1   -0.80    1.70
  14  -4  -1   -0.40    2.10
  14  -4  -1    1.10    2.10
  14  -4  -1    1.00    2.40
 -14   4   1    0.00    2.10
 -14   4   1   -4.80    2.00
  13  -4  -1    3.70    2.40
  13  -4  -1    2.50    2.20
  13  -4  -1    0.30    2.10
  13  -4  -1    0.10    1.70
 -13   4   1    4.00    2.20
 -13   4   1    3.30    2.10
  12  -4  -1   -0.40    1.50
  12  -4  -1    0.40    1.80
  12  -4  -1    3.10    2.40
  12  -4  -1   -2.80    2.00
 -12   4   1   -2.30    1.80
 -12   4   1   -3.70    1.80
  11  -4  -1   23.10    3.10
  11  -4  -1   21.00    3.20
  11  -4  -1   26.90    2.60
  11  -4  -1   26.10    2.80
 -11   4   1   23.60    2.60
 -11   4   1   26.30    2.80
  10  -4  -1   18.90    2.70
  10  -4  -1   28.60    2.70
  10  -4  -1   24.00    2.20
 -10   4   1   22.80    2.50
 -10   4   1   25.10    2.40
   9  -4  -1   78.89    4.00
   9  -4  -1   74.29    3.90
   9  -4  -1   74.49    4.70
  -9   4   1   74.69    4.10
  -9   4   1   71.29    3.90
   8  -4  -1   -0.90    0.60
   8  -4  -1    1.70    1.30
  -8   4   1    0.80    1.20
  -8   4   1    1.40    1.10
   7  -4  -1   -0.80    1.00
   7  -4  -1    0.50    0.40
  -7   4   1    0.20    1.10
  -7   4   1    0.80    1.20
  -7   4   1    0.90    1.10
  -7   4   1   -0.50    1.00
   6  -4  -1   14.80    1.80
   6  -4  -1   14.70    1.50
  -6   4   1   16.00    1.60
  -6   4   1   17.90    1.70
  -6   4   1   15.80    1.40
  -6   4   1   11.40    1.40
   5  -4  -1   59.49    2.40
   5  -4  -1   56.79    3.40
   5  -4  -1   61.09    2.40
   5  -4  -1   56.29    2.80
  -5   4   1   54.09    2.80
  -5   4   1   60.69    3.00
  -5   4   1   63.99    2.40
  -5   4   1   60.19    3.50
  -5   4   1   63.89    3.00
   4  -4  -1   40.60    2.60
   4  -4  -1   40.20    1.90
   4  -4  -1   38.70    1.90
  -4   4   1   36.60    1.90
  -4   4   1   40.30    1.90
  -4   4   1   42.40    2.30
  -4   4   1   37.50    2.20
  -4   4   1   41.40    2.70
   3  -4  -1    5.40    1.30
   3  -4  -1    6.60    0.80
  -3   4   1    7.40    0.90
  -3   4   1    6.60    0.90
  -3   4   1    6.90    0.90
  -3   4   1    9.30    1.00
   2  -4  -1   41.50    1.70
   2  -4  -1   40.20    2.30
  -2   4   1   40.40    1.60
  -2   4   1   38.10    2.40
  -2   4   1   42.40    2.00
  -2   4   1   41.20    2.00
  -2   4   1   43.10    1.90
  -2   4   1   38.90    1.50
  -2   4   1   33.30    1.60
  -2   4   1   45.30    2.30
   1  -4  -1    3.40    1.00
   1  -4  -1    3.10    0.30
  -1   4   1    2.70    0.90
  -1   4   1    3.40    1.00
  -1   4   1    2.60    0.80
  -1   4   1    2.50    1.00
   0   4   1    6.40    1.10
   0   4   1    6.10    0.90
   0   4   1    7.50    1.00
   0   4   1    5.50    1.00
  -1  -4  -1   12.80    0.70
   1   4   1   10.80    1.20
   1   4   1   12.00    1.20
   1   4   1   12.10    1.20
   1   4   1   12.60    1.30
   1   4   1   12.70    0.80
   1   4   1   11.60    0.80
   2   4   1   26.80    1.30
   2   4   1   27.50    1.70
   2   4   1   28.10    1.40
   2   4   1   21.60    1.20
   2   4   1   25.50    1.80
  -3  -4  -1   28.40    1.60
  -3  -4  -1   34.40    1.60
   3   4   1   24.70    1.90
   3   4   1   32.50    2.10
   3   4   1   30.40    1.70
   3   4   1   26.80    1.80
   3   4   1   29.90    1.90
   3   4   1   28.10    1.90
   3   4   1   30.20    1.80
   3   4   1   31.60    1.80
  -4  -4  -1   19.80    1.60
  -4  -4  -1   21.30    1.50
  -4  -4  -1   21.20    1.50
   4   4   1   20.00    1.20
   4   4   1   20.90    1.70
   4   4   1   21.60    1.80
   4   4   1   20.00    1.70
   4   4   1   19.10    1.50
   4   4   1   18.10    1.60
   4   4   1   20.40    1.60
  -5  -4  -1    5.40    1.00
  -5  -4  -1    3.70    1.00
   5   4   1    5.40    1.10
   5   4   1    4.10    1.20
   5   4   1    3.80    1.20
   5   4   1    6.90    1.20
   5   4   1    3.60    0.80
   5   4   1    6.70    1.20
   5   4   1    4.80    1.20
  -6  -4  -1    2.20    1.00
  -6  -4  -1    1.30    1.00
   6   4   1    0.50    1.20
   6   4   1    0.40    1.20
   6   4   1    1.00    1.20
   6   4   1    1.00    0.90
   6   4   1    2.60    1.00
   6   4   1   -0.40    1.00
   6   4   1    0.10    1.10
   6   4   1    1.20    1.10
  -7  -4  -1   15.90    1.70
  -7  -4  -1   13.40    1.60
   7   4   1   15.40    1.70
   7   4   1    7.80    2.20
   7   4   1   16.80    2.00
   7   4   1   17.80    1.90
   7   4   1   18.50    1.80
   7   4   1   15.10    1.60
   7   4   1   18.30    1.60
  -8  -4  -1   12.50    1.70
  -8  -4  -1    7.80    1.40
   8   4   1    8.50    1.40
   8   4   1   10.70    1.90
   8   4   1    9.80    1.50
   8   4   1    9.90    1.70
   8   4   1    7.50    1.70
   8   4   1   10.30    1.50
   8   4   1    9.60    1.90
   8   4   1   10.70    1.40
  -9  -4  -1   57.09    3.40
  -9  -4  -1   59.19    3.40
   9   4   1   58.79    3.10
   9   4   1   57.89    3.50
   9   4   1   54.19    3.70
   9   4   1   61.09    3.70
   9   4   1   59.39    3.60
   9   4   1   60.19    3.80
   9   4   1   57.79    3.20
 -10  -4  -1   -0.60    1.30
 -10  -4  -1    0.90    1.40
 -10  -4  -1    0.10    1.20
  10   4   1    3.40    2.00
  10   4   1    1.40    1.80
  10   4   1    1.50    1.90
  10   4   1    2.00    1.80
  10   4   1   -0.30    1.30
  10   4   1    3.10    1.50
  10   4   1    1.80    1.20
  10   4   1    2.30    1.20
 -11  -4  -1    9.60    2.00
 -11  -4  -1   10.90    1.90
 -11  -4  -1   12.90    1.70
  11   4   1   12.20    2.30
  11   4   1   13.00    1.90
  11   4   1   11.50    1.70
  11   4   1   11.00    2.00
  11   4   1   10.50    2.20
  11   4   1   14.40    2.40
  11   4   1   13.70    1.70
  11   4   1    8.90    2.30
 -12  -4  -1   31.50    2.60
 -12  -4  -1   34.00    3.20
 -12  -4  -1   33.00    3.10
  12   4   1   37.60    3.30
  12   4   1   40.30    3.40
  12   4   1   39.70    4.00
  12   4   1   34.70    3.90
  12   4   1   34.10    2.70
  12   4   1   29.90    3.60
 -13  -4  -1    0.00    1.70
 -13  -4  -1   -0.70    2.00
  13   4   1    0.60    2.30
  13   4   1    1.70    2.00
  13   4   1    3.90    2.70
  13   4   1    4.70    1.90
 -14  -4  -1   78.79    5.20
 -14  -4  -1   72.39    5.00
  14   4   1   84.99    5.30
  14   4   1   78.29    6.10
  14   4   1   79.19    5.30
  14   4   1   74.09    5.70
  15   4   1   18.20    3.80
  15   4   1   22.90    3.90
  15   4   1   19.40    3.00
  16   4   1    0.70    2.30
  16   4   1    6.30    3.30
  16   4   1    0.40    3.00
  17   4   1    2.60    3.40
  17   4   1    1.60    2.70
  17   4   1    3.10    3.40
  18   4   1    2.00    3.20
  18   4   1   -6.60    3.70
  15  -5  -1   10.20    3.90
  15  -5  -1    9.50    2.50
  15  -5  -1   10.80    3.40
  15  -5  -1    6.10    2.70
 -15   5   1   13.10    3.00
 -15   5   1    7.70    2.80
  14  -5  -1    0.40    2.10
  14  -5  -1    3.70    3.00
  14  -5  -1    3.30    2.30
  14  -5  -1   -0.50    1.80
 -14   5   1    3.50    2.40
 -14   5   1    0.70    2.20
  13  -5  -1    4.90    2.20
  13  -5  -1    5.40    2.70
  13  -5  -1    3.20    1.90
  13  -5  -1    8.30    2.90
 -13   5   1    4.80    2.30
 -13   5   1    2.10    2.30
  12  -5  -1    0.50    1.90
  12  -5  -1   -0.30    1.90
  12  -5  -1   -1.00    2.10
  12  -5  -1    1.10    1.50
 -12   5   1   -2.50    1.80
 -12   5   1   -0.50    1.80
  11  -5  -1   -2.00    1.80
  11  -5  -1    1.70    1.40
  11  -5  -1    1.20    1.80
 -11   5   1    5.10    1.80
 -11   5   1    2.40    1.80
  10  -5  -1    3.80    1.90
  10  -5  -1    2.60    1.80
  10  -5  -1    3.40    1.20
 -10   5   1    4.00    1.70
 -10   5   1    3.80    1.60
   9  -5  -1   12.60    2.10
   9  -5  -1   10.20    1.80
  -9   5   1   12.00    1.80
  -9   5   1   11.60    1.80
   8  -5  -1    0.30    0.70
   8  -5  -1    2.40    1.30
  -8   5   1    2.50    1.30
  -8   5   1    4.30    1.30
   7  -5  -1    3.40    1.10
   7  -5  -1   -1.30    0.80
  -7   5   1    1.70    1.10
  -7   5   1    1.80    1.20
  -7   5   1    3.30    1.30
  -7   5   1    0.20    0.70
   6  -5  -1    9.40    1.20
   6  -5  -1   10.30    0.80
   6  -5  -1   11.40    0.80
   6  -5  -1    8.90    1.70
  -6   5   1    7.70    1.30
  -6   5   1    7.00    1.50
  -6   5   1    8.80    1.30
  -6   5   1    8.70    1.40
   5  -5  -1   24.70    2.40
   5  -5  -1   28.80    1.60
   5  -5  -1   27.30    1.60
  -5   5   1   29.30    2.00
  -5   5   1   27.60    2.50
  -5   5   1   26.40    1.60
  -5   5   1   24.80    2.00
  -5   5   1   22.60    1.60
   4  -5  -1   30.80    2.40
   4  -5  -1   32.90    1.80
   4  -5  -1   35.90    1.90
  -4   5   1   32.70    1.80
  -4   5   1   34.90    1.90
  -4   5   1   34.10    2.50
  -4   5   1   31.80    1.70
  -4   5   1   34.80    2.00
  -4   5   1   34.50    1.90
  -4   5   1   36.20    2.10
   3  -5  -1    2.70    0.70
   3  -5  -1    1.80    1.00
  -3   5   1    2.40    1.20
  -3   5   1    1.90    0.60
  -3   5   1    2.40    0.70
  -3   5   1    2.50    1.00
  -3   5   1    2.20    0.90
  -3   5   1    2.20    0.80
  -3   5   1    2.90    1.10
  -3   5   1    3.00    0.70
  -3   5   1    2.90    0.70
   2  -5  -1   11.30    1.40
   2  -5  -1   10.30    0.80
  -2   5   1    5.80    1.20
  -2   5   1   10.80    0.90
  -2   5   1   13.60    1.30
  -2   5   1   12.00    1.20
   1  -5  -1  785.52   30.60
  -1   5   1  797.12   27.70
  -1   5   1  797.42   30.60
  -1   5   1  789.82   29.90
  -1   5   1  793.72   28.60
   0   5   1  498.05   18.30
   0   5   1  503.65   19.10
   0   5   1  501.25   17.70
   0   5   1  496.55   19.40
  -1  -5  -1 2155.08   75.59
   1   5   1 2245.88   82.59
   1   5   1 2188.58   75.19
   1   5   1 2169.48   76.79
   1   5   1 2318.57   75.29
   1   5   1 2211.98   84.39
   1   5   1 2269.17   79.29
  -2  -5  -1 3829.22  132.39
   2   5   1 4015.50  130.89
   2   5   1 3977.80  131.89
   2   5   1 3896.31  147.19
   2   5   1 3727.03  130.79
   2   5   1 3885.51  144.19
   3   5   1 3199.08  119.89
   3   5   1 3249.27  111.39
   3   5   1 3250.47  109.59
   3   5   1 3247.58  114.99
   3   5   1 3121.59  109.59
   3   5   1 3306.87  108.69
   3   5   1 3232.18  122.29
  -4  -5  -1   14.30    1.30
  -4  -5  -1   13.10    1.10
   4   5   1   11.20    1.30
   4   5   1   11.10    1.30
   4   5   1   13.70    1.20
   4   5   1   12.20    1.60
   4   5   1   16.50    1.70
   4   5   1   11.90    1.40
   4   5   1   13.40    1.50
  -5  -5  -1  478.75   16.60
  -5  -5  -1  478.65   16.80
  -5  -5  -1  470.55   19.50
   5   5   1  491.35   19.10
   5   5   1  466.65   16.80
   5   5   1  484.95   17.00
   5   5   1  475.55   18.70
   5   5   1  480.55   17.20
   5   5   1  479.25   17.70
  -6  -5  -1    7.20    1.20
  -6  -5  -1    5.60    1.20
   6   5   1    6.00    1.30
   6   5   1    5.90    1.50
   6   5   1    4.90    1.40
   6   5   1    6.80    1.40
   6   5   1    5.10    1.30
   6   5   1    5.00    1.50
  -7  -5  -1    0.20    1.00
  -7  -5  -1    0.40    1.10
   7   5   1    1.40    1.10
   7   5   1    1.30    1.30
   7   5   1    1.40    1.10
   7   5   1   12.80    2.20
   7   5   1    1.50    1.40
   7   5   1    0.60    1.20
  -8  -5  -1   78.19    3.70
  -8  -5  -1   75.09    3.80
   8   5   1   74.39    3.70
   8   5   1   74.79    4.10
   8   5   1   74.99    4.00
   8   5   1   67.49    4.50
   8   5   1   79.79    3.80
   8   5   1   68.59    4.40
   8   5   1   85.99    4.10
   8   5   1   70.19    3.80
  -9  -5  -1   34.80    2.70
  -9  -5  -1   33.80    2.60
   9   5   1   30.00    2.50
   9   5   1   32.10    2.90
   9   5   1   34.20    2.80
   9   5   1   31.60    3.00
   9   5   1   33.60    2.80
   9   5   1   32.10    2.60
   9   5   1   30.30    2.40
   9   5   1   29.80    2.50
 -10  -5  -1   79.99    4.30
 -10  -5  -1   91.09    4.30
 -10  -5  -1   80.19    4.10
  10   5   1   81.29    4.50
  10   5   1   74.49    4.40
  10   5   1   79.89    4.00
  10   5   1   85.99    4.80
  10   5   1   79.79    4.10
  10   5   1   80.19    4.70
  10   5   1   76.49    4.80
 -11  -5  -1    0.50    1.50
 -11  -5  -1    1.30    1.40
 -11  -5  -1    1.10    1.50
  11   5   1    3.60    1.80
  11   5   1    0.90    1.40
  11   5   1    1.00    1.50
  11   5   1    0.60    1.50
  11   5   1    0.60    2.00
  11   5   1   -0.90    2.00
  11   5   1   -0.10    1.80
  11   5   1   -0.20    1.40
 -12  -5  -1    1.40    1.80
 -12  -5  -1    5.00    1.60
 -12  -5  -1    0.20    1.70
  12   5   1    2.50    1.80
  12   5   1    0.90    1.50
  12   5   1   -1.90    2.10
  12   5   1    2.90    1.50
  12   5   1    2.30    2.20
  12   5   1    0.90    2.30
  12   5   1    1.40    1.70
  12   5   1   -2.80    2.10
 -13  -5  -1   64.59    4.30
 -13  -5  -1   59.69    4.30
  13   5   1   56.19    4.40
  13   5   1   65.39    4.40
  13   5   1   60.39    4.90
  13   5   1   47.40    4.60
  14   5   1    2.60    2.20
  14   5   1    1.10    3.00
  14   5   1    2.10    3.00
  15   5   1    6.50    3.10
  15   5   1    7.60    3.10
  15   5   1    0.20    2.30
  16   5   1   -0.70    2.80
  16   5   1    0.00    2.40
  16   5   1   -4.40    2.80
  17   5   1   -2.60    3.20
  17   5   1    2.00    2.80
  17   5   1    7.20    3.60
  18   5   1    6.80    3.30
  18   5   1   -3.10    4.10
  14  -6  -1    0.10    2.10
  14  -6  -1    6.20    3.10
  14  -6  -1   -0.70    2.50
 -14   6   1    1.60    2.30
 -14   6   1    0.00    2.20
  13  -6  -1   -0.30    2.10
  13  -6  -1    4.30    2.60
  13  -6  -1    0.90    2.10
 -13   6   1    5.60    2.30
 -13   6   1    6.70    2.30
  12  -6  -1    0.50    1.90
  12  -6  -1   -3.20    1.90
 -12   6   1   -1.90    1.80
 -12   6   1    2.80    2.00
  11  -6  -1    1.60    2.00
  11  -6  -1    0.40    1.70
 -11   6   1    3.30    1.80
 -11   6   1    0.40    1.80
  10  -6  -1    1.70    1.60
  10  -6  -1    0.70    1.60
 -10   6   1    1.20    1.60
 -10   6   1    2.00    1.60
   9  -6  -1    8.00    2.00
   9  -6  -1    5.20    1.60
  -9   6   1    9.20    1.60
  -9   6   1    8.30    1.80
   8  -6  -1    9.30    2.00
   8  -6  -1    5.10    1.40
  -8   6   1    8.10    1.60
  -8   6   1    6.20    1.30
   7  -6  -1   -0.70    0.70
   7  -6  -1    3.10    1.50
  -7   6   1   -1.60    1.10
  -7   6   1   -0.20    0.80
  -7   6   1    0.00    0.50
  -7   6   1    3.40    1.20
   6  -6  -1    7.80    1.90
   6  -6  -1   12.20    1.10
   6  -6  -1   13.00    1.10
  -6   6   1   11.00    1.50
  -6   6   1   12.90    1.50
  -6   6   1   12.00    2.10
   5  -6  -1   41.50    2.10
   5  -6  -1   35.20    2.10
   5  -6  -1   38.80    3.00
   5  -6  -1   40.40    2.10
  -5   6   1   38.90    2.00
  -5   6   1   29.30    1.90
  -5   6   1   38.00    2.30
  -5   6   1   36.90    2.80
  -5   6   1   38.40    2.10
  -5   6   1   40.70    2.30
   4  -6  -1   14.20    1.20
   4  -6  -1   15.50    1.80
   4  -6  -1   19.30    1.50
  -4   6   1   14.60    1.40
  -4   6   1   16.50    1.30
  -4   6   1   15.80    1.20
  -4   6   1   13.70    1.30
  -4   6   1   13.70    1.90
  -4   6   1   14.20    1.20
  -4   6   1   15.60    1.40
   3  -6  -1    2.00    1.00
   3  -6  -1    1.10    0.60
   3  -6  -1    2.10    1.20
  -3   6   1    1.30    0.70
  -3   6   1    1.70    0.60
  -3   6   1    1.80    1.00
  -3   6   1    2.70    1.00
  -3   6   1    1.80    0.50
  -3   6   1    0.20    1.20
  -3   6   1    1.10    0.60
  -3   6   1    1.70    1.30
   2  -6  -1   37.20    2.40
   2  -6  -1   38.40    1.60
  -2   6   1   34.40    2.50
  -2   6   1   39.40    1.60
  -2   6   1   41.00    2.70
  -2   6   1   39.60    1.70
  -2   6   1   40.80    2.20
  -2   6   1   41.10    2.20
  -1   6   1    6.60    1.20
  -1   6   1    9.00    1.30
   0   6   1   -0.10    1.00
   0   6   1    0.00    1.00
   0   6   1    0.80    0.90
   0   6   1   -1.90    0.90
  -1  -6  -1    6.50    0.50
   1   6   1    6.70    1.30
   1   6   1    5.60    1.10
   1   6   1    2.00    0.90
   1   6   1    6.80    0.50
   1   6   1    7.10    0.50
  -2  -6  -1    9.30    0.80
   2   6   1   10.20    1.30
   2   6   1    7.70    0.60
   2   6   1   10.40    0.90
   2   6   1    7.70    1.30
   2   6   1    9.40    0.70
  -3  -6  -1   16.10    1.30
   3   6   1   16.50    1.30
   3   6   1   16.00    1.50
   3   6   1   15.70    1.20
   3   6   1   16.60    1.70
   4   6   1   41.90    2.30
   4   6   1   39.90    2.40
   4   6   1   41.30    2.70
   4   6   1   44.60    2.20
   4   6   1   46.10    2.60
   4   6   1   47.00    2.80
   4   6   1   42.70    2.60
   4   6   1   44.10    2.30
  -5  -6  -1   12.70    1.20
  -5  -6  -1   12.40    1.20
   5   6   1   13.50    1.50
   5   6   1   12.20    1.70
   5   6   1   13.80    1.50
   5   6   1   13.80    1.60
   5   6   1   15.40    1.80
  -6  -6  -1    4.50    1.10
  -6  -6  -1    5.50    1.20
   6   6   1    6.30    1.50
   6   6   1    3.20    1.30
   6   6   1    4.30    1.40
   6   6   1    7.00    1.50
  -7  -6  -1    0.10    1.10
  -7  -6  -1   -0.50    1.00
   7   6   1   -0.50    1.30
   7   6   1   -0.10    1.30
   7   6   1   -1.20    0.50
   7   6   1   -0.90    1.50
   7   6   1   -0.10    0.90
   7   6   1   -0.60    1.40
   7   6   1   -0.20    1.20
  -8  -6  -1   39.30    2.70
  -8  -6  -1   40.60    2.70
   8   6   1   48.20    3.20
   8   6   1   41.10    2.80
   8   6   1   43.10    3.20
   8   6   1   38.30    2.90
   8   6   1   44.60    2.90
   8   6   1   40.00    3.10
   8   6   1   48.60    2.80
   8   6   1   50.09    3.80
  -9  -6  -1   14.30    1.80
  -9  -6  -1   17.60    2.00
   9   6   1   17.90    2.40
   9   6   1   16.00    2.20
   9   6   1   19.60    2.10
   9   6   1   17.10    2.50
   9   6   1   17.70    1.80
   9   6   1   13.90    1.90
   9   6   1   19.40    2.10
   9   6   1   19.40    2.30
 -10  -6  -1   23.50    2.40
 -10  -6  -1   22.50    2.30
 -10  -6  -1   22.20    2.20
  10   6   1   24.00    2.60
  10   6   1   22.80    2.30
  10   6   1   23.80    2.40
  10   6   1   21.80    2.60
  10   6   1   22.40    2.20
  10   6   1   20.50    2.80
  10   6   1   25.70    2.70
  10   6   1   25.40    2.40
 -11  -6  -1   -0.30    1.40
 -11  -6  -1    0.40    1.50
 -11  -6  -1   -0.90    1.50
  11   6   1    0.10    1.40
  11   6   1   -0.70    1.50
  11   6   1   -0.90    1.70
  11   6   1    0.10    1.00
  11   6   1   -0.30    2.00
  11   6   1   -1.00    1.30
  11   6   1    2.30    2.10
  11   6   1   -4.60    1.60
 -12  -6  -1    9.30    1.90
  12   6   1    5.50    1.80
  12   6   1    8.70    2.00
  12   6   1    7.50    2.40
  12   6   1    9.50    2.90
  12   6   1    7.60    1.80
  12   6   1    7.10    2.60
  12   6   1   11.00    2.50
 -13  -6  -1    3.30    1.70
  13   6   1    0.80    2.30
  13   6   1    1.20    2.40
  13   6   1    1.30    1.90
  13   6   1   -1.70    1.60
  13   6   1    0.40    2.20
  13   6   1   -2.10    2.10
  14   6   1   15.00    3.20
  14   6   1    9.20    2.50
  14   6   1    9.70    3.20
  15   6   1   20.40    3.90
  15   6   1   25.00    4.00
  15   6   1   28.80    3.30
  16   6   1   -4.00    2.90
  16   6   1    1.50    2.40
  16   6   1   -0.70    3.10
  17   6   1    2.50    3.60
  17   6   1   -3.40    3.50
  17   6   1    0.30    2.70
  18   6   1   11.70    3.60
  18   6   1   -2.10    4.20
  14  -7  -1    5.10    2.80
  14  -7  -1    5.50    2.50
  14  -7  -1    2.70    2.90
 -14   7   1    5.10    2.50
 -14   7   1    2.90    2.40
  13  -7  -1    3.70    2.40
  13  -7  -1    2.40    2.20
  13  -7  -1    4.30    2.30
 -13   7   1    1.00    2.20
 -13   7   1    4.50    2.30
  12  -7  -1    0.80    2.20
  12  -7  -1    3.00    1.90
 -12   7   1    2.00    1.90
 -12   7   1    0.20    1.90
  11  -7  -1   14.50    2.80
  11  -7  -1   13.30    2.30
 -11   7   1   19.50    2.60
 -11   7   1   14.90    2.30
  10  -7  -1   11.40    2.50
  10  -7  -1   15.50    2.20
 -10   7   1   13.50    2.20
 -10   7   1   10.40    1.90
   9  -7  -1    3.20    2.00
   9  -7  -1    4.40    1.60
  -9   7   1    4.40    1.50
  -9   7   1    3.10    1.40
   8  -7  -1   32.00    2.60
   8  -7  -1   44.40    3.80
  -8   7   1   31.80    2.60
  -8   7   1   40.60    2.50
   7  -7  -1   23.30    2.80
   7  -7  -1   15.20    1.50
  -7   7   1   15.90    1.50
  -7   7   1    9.70    1.30
  -7   7   1   29.10    2.90
   6  -7  -1   39.70    3.50
   6  -7  -1   45.10    2.40
   6  -7  -1   48.00    2.40
  -6   7   1   45.10    2.70
  -6   7   1   48.60    2.40
  -6   7   1   41.40    3.30
  -6   7   1   41.40    2.40
  -6   7   1   49.10    2.70
   5  -7  -1    1.50    1.00
   5  -7  -1    2.10    1.10
   5  -7  -1    0.90    1.30
   5  -7  -1   -0.20    0.90
  -5   7   1    0.20    0.90
  -5   7   1    0.70    0.80
  -5   7   1   -0.50    0.90
  -5   7   1    0.30    1.50
  -5   7   1    0.20    0.80
  -5   7   1    0.80    0.90
   4  -7  -1  341.87   12.60
   4  -7  -1  327.77   11.90
   4  -7  -1  326.47   13.90
  -4   7   1  325.27   11.60
  -4   7   1  348.47   12.30
  -4   7   1  349.96   11.80
  -4   7   1  345.87   12.60
  -4   7   1  319.07   13.90
  -4   7   1  338.87   11.90
  -4   7   1  325.27   11.80
   3  -7  -1   12.80    1.50
   3  -7  -1   14.40    1.10
   3  -7  -1   11.50    1.60
  -3   7   1   14.20    1.10
  -3   7   1   16.70    1.90
  -3   7   1   15.30    1.10
  -3   7   1   13.00    1.50
  -3   7   1   12.80    1.80
  -3   7   1   16.20    0.90
  -3   7   1   11.30    1.50
   2  -7  -1    8.70    0.60
   2  -7  -1    9.90    1.50
  -2   7   1    7.90    0.60
  -2   7   1    6.80    1.50
  -2   7   1    3.70    1.10
  -2   7   1    5.80    1.40
  -2   7   1    3.00    1.10
  -1   7   1  271.97   10.80
  -1   7   1  249.78   10.60
   0   7   1    0.70    1.10
   0   7   1    0.50    1.00
   0   7   1    1.20    1.10
   0   7   1    1.40    1.00
  -1  -7  -1   22.00    1.00
   1   7   1   25.50    2.10
   1   7   1   23.70    2.00
   1   7   1   22.00    2.00
   1   7   1   24.90    1.10
  -2  -7  -1   87.39    3.30
   2   7   1   84.59    4.10
   2   7   1   87.19    4.10
   2   7   1   90.19    3.40
   2   7   1   91.59    3.40
   2   7   1   91.39    3.20
   2   7   1   84.19    4.00
  -3  -7  -1  366.56   12.60
   3   7   1  316.17   12.50
   3   7   1  377.76   12.40
   3   7   1  378.46   12.60
   3   7   1  365.56   14.20
   3   7   1  347.77   12.40
   4   7   1    3.10    0.90
   4   7   1    3.10    1.30
   4   7   1    1.10    1.10
   4   7   1    4.10    1.20
   4   7   1    2.30    0.90
   4   7   1    1.60    0.90
   4   7   1    4.20    1.30
  -5  -7  -1  155.08    6.30
   5   7   1  149.09    6.50
   5   7   1  143.79    5.80
   5   7   1  150.58    5.70
   5   7   1  146.69    6.40
   5   7   1  136.19    6.50
   5   7   1  155.68    5.90
   5   7   1  143.29    5.90
   5   7   1  149.69    6.30
  -6  -7  -1 1189.08   47.30
   6   7   1 1199.78   44.60
   6   7   1 1145.29   45.20
   6   7   1 1183.78   40.80
   6   7   1 1201.98   41.50
   6   7   1 1141.69   40.30
   6   7   1 1184.18   42.80
  -7  -7  -1    4.00    1.20
  -7  -7  -1    4.20    1.10
   7   7   1    2.20    1.30
   7   7   1    2.70    1.40
   7   7   1   11.90    2.20
   7   7   1    4.40    1.50
   7   7   1    4.10    1.30
  -8  -7  -1  195.98    7.80
  -8  -7  -1  203.38    7.70
   8   7   1  198.48    8.90
   8   7   1  198.28    8.20
   8   7   1  192.88    8.00
   8   7   1  206.58    8.70
   8   7   1  194.98    8.00
   8   7   1  203.58    8.20
   8   7   1  196.78    8.40
  -9  -7  -1    6.10    1.40
  -9  -7  -1    4.10    1.40
   9   7   1    3.90    1.10
   9   7   1    5.90    1.90
   9   7   1    3.50    1.70
   9   7   1    5.10    1.70
   9   7   1    3.60    1.30
   9   7   1    6.10    1.90
   9   7   1    5.30    1.60
   9   7   1    2.40    1.90
 -10  -7  -1    9.40    1.80
 -10  -7  -1    6.30    1.90
 -10  -7  -1   10.70    1.70
  10   7   1   11.50    2.20
  10   7   1    9.20    2.00
  10   7   1    9.50    2.20
  10   7   1    7.80    1.50
  10   7   1    6.60    2.50
  10   7   1    7.40    1.70
  10   7   1   11.30    1.90
  10   7   1   10.70    2.10
 -11  -7  -1   10.40    2.00
  11   7   1    7.80    1.70
  11   7   1   10.30    2.00
  11   7   1   11.50    2.50
  11   7   1    9.00    2.30
  11   7   1    6.40    1.80
  11   7   1    8.00    2.60
  11   7   1    9.70    2.40
 -12  -7  -1   35.50    3.00
  12   7   1   47.40    4.10
  12   7   1   38.70    3.30
  12   7   1   32.30    3.10
  12   7   1   43.40    3.80
  12   7   1   35.00    4.00
  12   7   1   38.20    3.20
  12   7   1   36.90    3.80
 -13  -7  -1   45.30    3.40
  13   7   1   42.00    3.60
  13   7   1   39.80    4.10
  13   7   1   32.60    4.00
  13   7   1   42.80    4.00
  13   7   1   42.30    3.80
  13   7   1   44.60    3.50
  13   7   1   49.50    4.30
  14   7   1    0.80    2.10
  14   7   1   -0.30    2.90
  14   7   1    3.30    3.00
  15   7   1   20.00    3.70
  15   7   1   20.00    3.90
  15   7   1   23.10    3.10
  16   7   1    5.20    3.60
  16   7   1    8.20    2.80
  16   7   1    5.80    3.40
  17   7   1    6.90    3.90
  17   7   1    8.20    3.00
  17   7   1    4.60    3.80
  18   7   1   10.20    5.00
  18   7   1    0.20    5.80
  13  -8  -1    1.20    2.20
  13  -8  -1   -0.80    2.50
 -13   8   1    1.10    2.20
 -13   8   1   -1.90    2.00
  12  -8  -1    3.10    2.00
  12  -8  -1    2.20    2.40
 -12   8   1    3.20    2.00
 -12   8   1    4.90    2.20
  11  -8  -1    0.20    1.80
  11  -8  -1    1.00    1.80
 -11   8   1    1.10    1.90
 -11   8   1    0.50    1.70
  10  -8  -1   -0.20    1.80
  10  -8  -1   -0.60    1.60
 -10   8   1   -0.20    1.60
 -10   8   1    1.50    1.50
   9  -8  -1    6.20    1.60
   9  -8  -1    4.10    2.00
  -9   8   1    6.00    1.60
  -9   8   1    6.20    1.40
   8  -8  -1    7.10    2.30
   8  -8  -1    4.30    1.30
  -8   8   1    3.60    1.30
  -8   8   1    4.20    1.20
   7  -8  -1    4.30    1.20
   7  -8  -1    2.20    1.70
  -7   8   1    1.60    1.10
  -7   8   1    3.60    2.10
  -7   8   1    2.80    1.10
   6  -8  -1   15.50    1.60
   6  -8  -1   15.00    1.50
   6  -8  -1   12.80    2.20
  -6   8   1   10.70    1.50
  -6   8   1   14.40    1.60
  -6   8   1   14.40    1.50
  -6   8   1   13.20    2.20
  -6   8   1   15.20    1.40
  -6   8   1    9.90    1.30
   5  -8  -1    0.10    0.80
   5  -8  -1    1.40    1.50
   5  -8  -1    1.00    1.10
   5  -8  -1    0.80    1.10
  -5   8   1   -1.50    0.80
  -5   8   1   -1.20    1.40
  -5   8   1   -1.10    0.90
  -5   8   1   -0.20    1.00
  -5   8   1   -0.10    0.80
  -5   8   1    0.70    0.90
   4  -8  -1   14.40    2.00
   4  -8  -1   17.20    1.30
   4  -8  -1   20.00    1.80
  -4   8   1   16.30    2.20
  -4   8   1   17.20    1.30
  -4   8   1   17.10    1.30
  -4   8   1   16.20    2.30
   3  -8  -1   17.20    1.10
   3  -8  -1   15.40    2.00
   3  -8  -1   18.40    1.80
  -3   8   1   14.30    1.70
  -3   8   1   15.70    1.20
  -3   8   1   17.40    2.10
  -3   8   1   15.20    0.90
  -3   8   1    8.60    1.50
  -3   8   1   17.50    2.00
   2  -8  -1  124.49    5.30
   2  -8  -1  124.49    5.80
   2  -8  -1  120.09    4.30
  -2   8   1  125.19    5.30
  -2   8   1  120.89    4.40
  -2   8   1  122.59    5.80
  -2   8   1  119.69    5.70
  -2   8   1  117.59    5.20
  -2   8   1  114.79    4.30
  -1   8   1   77.19    3.80
  -1   8   1   78.09    3.90
  -1   8   1   76.39    4.10
  -1   8   1   74.49    4.10
   0   8   1  144.09    6.50
   0   8   1  149.49    6.20
   0   8   1  144.99    6.30
   0   8   1  147.79    6.50
  -1  -8  -1  196.08    6.80
   1   8   1  216.28    8.10
   1   8   1  178.38    8.20
   1   8   1  199.58    7.80
   1   8   1  191.28    6.80
  -2  -8  -1   13.40    1.00
   2   8   1   19.30    2.10
   2   8   1   10.50    1.80
   2   8   1   15.00    1.10
   2   8   1   11.40    1.50
   2   8   1   17.00    1.90
   2   8   1   14.40    1.10
  -3  -8  -1   10.60    1.00
   3   8   1   10.70    1.00
   3   8   1   11.50    1.70
   3   8   1   11.70    1.10
   3   8   1   11.80    1.00
   3   8   1   10.60    1.10
   3   8   1    8.60    1.70
   3   8   1   11.50    1.50
   3   8   1   11.10    1.60
  -4  -8  -1    7.60    1.00
   4   8   1    7.60    1.70
   4   8   1    7.70    1.00
   4   8   1    6.20    1.00
   4   8   1    7.30    1.40
   4   8   1    7.30    1.40
   4   8   1    8.10    1.10
   4   8   1    2.00    0.90
   5   8   1    7.70    1.60
   5   8   1    7.40    1.70
   5   8   1    7.60    1.40
   5   8   1    7.50    1.20
   5   8   1    6.90    1.60
   5   8   1   10.60    1.30
   5   8   1    7.10    1.30
   5   8   1    7.20    1.40
  -6  -8  -1   -0.30    0.80
   6   8   1    1.40    1.20
   6   8   1   -1.20    1.20
   6   8   1    0.10    1.20
   6   8   1    1.40    1.50
   6   8   1    1.00    1.60
   6   8   1    0.70    1.50
   6   8   1    0.10    1.00
  -7  -8  -1    6.60    1.20
   7   8   1    1.60    1.30
   7   8   1    6.60    1.90
   7   8   1    3.60    1.50
   7   8   1    4.50    1.60
   7   8   1    4.20    1.40
   7   8   1    4.20    1.60
  -8  -8  -1   16.10    1.60
  -8  -8  -1   16.00    1.80
   8   8   1   12.30    1.90
   8   8   1   13.20    2.10
   8   8   1   11.20    2.00
   8   8   1   13.20    2.30
   8   8   1   12.70    2.00
   8   8   1    9.00    1.70
  -9  -8  -1   15.10    1.80
  -9  -8  -1   17.70    2.00
   9   8   1   16.10    2.20
   9   8   1   15.10    2.30
   9   8   1   11.70    2.20
   9   8   1   12.80    2.20
   9   8   1   14.70    2.20
   9   8   1   12.60    2.40
 -10  -8  -1   31.10    3.00
  10   8   1   39.00    3.30
  10   8   1   34.60    3.10
  10   8   1   36.30    3.10
  10   8   1   33.10    3.20
  10   8   1   36.10    3.60
  10   8   1   31.80    2.10
  10   8   1   35.40    3.10
 -11  -8  -1   29.20    3.10
  11   8   1   33.60    3.10
  11   8   1   38.50    4.00
  11   8   1   43.70    3.80
  11   8   1   37.90    3.00
  11   8   1   31.10    3.20
  11   8   1   28.40    3.00
  11   8   1   30.30    3.30
 -12  -8  -1    4.50    2.10
  12   8   1    4.60    2.40
  12   8   1    7.30    3.00
  12   8   1    6.20    2.60
  12   8   1    2.10    1.60
  12   8   1    7.10    2.20
  12   8   1    4.40    2.60
  12   8   1    4.20    1.90
 -13  -8  -1   16.10    2.50
  13   8   1   12.80    3.50
  13   8   1   10.80    2.90
  13   8   1   12.40    2.20
  13   8   1   16.60    3.20
  13   8   1   13.60    2.50
  13   8   1   16.50    2.60
  13   8   1   13.40    3.10
 -14  -8  -1    6.80    2.20
  14   8   1   13.70    2.60
  14   8   1    4.50    2.20
  14   8   1    9.60    3.80
  14   8   1    5.20    2.70
  14   8   1   10.00    3.50
  14   8   1    9.50    3.10
  15   8   1    3.80    3.30
  15   8   1    3.70    2.30
  15   8   1    2.90    3.10
  16   8   1    7.20    3.80
  16   8   1   -0.50    3.50
  16   8   1    3.20    2.50
  17   8   1    6.30    2.90
  17   8   1    9.20    3.90
  17   8   1    1.30    3.90
  18   8   1   34.30    4.90
  18   8   1   11.20    5.30
  13  -9  -1   -1.20    2.20
  13  -9  -1    4.30    2.90
 -13   9   1    2.60    2.20
 -13   9   1    1.70    2.30
  12  -9  -1    1.50    2.00
  12  -9  -1    3.80    2.60
 -12   9   1    3.10    2.10
 -12   9   1    3.30    2.20
  11  -9  -1    1.60    1.80
  11  -9  -1    5.50    2.70
 -11   9   1    1.30    1.70
 -11   9   1   -0.10    1.90
  10  -9  -1    2.30    1.70
  10  -9  -1    1.50    2.00
 -10   9   1    1.80    1.40
 -10   9   1    4.40    1.70
   9  -9  -1   23.60    3.50
   9  -9  -1   24.10    2.30
  -9   9   1   24.00    2.20
  -9   9   1   22.80    2.30
   8  -9  -1   24.10    2.20
   8  -9  -1   22.60    3.30
  -8   9   1   24.80    2.20
  -8   9   1   26.90    2.20
  -8   9   1   22.30    3.40
   7  -9  -1   13.90    1.70
   7  -9  -1   12.00    2.60
  -7   9   1   14.40    2.60
  -7   9   1   11.20    1.60
  -7   9   1   12.70    1.60
   6  -9  -1    5.00    1.20
   6  -9  -1    2.80    2.00
  -6   9   1    4.40    1.20
  -6   9   1    3.60    1.80
  -6   9   1    4.90    1.20
   5  -9  -1    0.60    1.40
   5  -9  -1    1.90    1.30
   5  -9  -1    1.50    0.90
   5  -9  -1    0.90    1.30
  -5   9   1    0.60    0.90
  -5   9   1    1.00    0.80
  -5   9   1   -0.10    0.90
  -5   9   1    0.20    0.90
  -5   9   1    1.50    1.10
  -5   9   1   -0.70    1.60
   4  -9  -1    5.60    0.90
   4  -9  -1    4.10    1.40
   4  -9  -1    6.40    1.40
  -4   9   1    6.20    1.00
  -4   9   1    5.90    1.50
  -4   9   1    5.40    1.40
  -4   9   1    6.20    1.00
  -4   9   1    3.70    1.80
  -4   9   1    4.00    1.00
  -4   9   1    6.70    0.80
  -4   9   1    5.20    1.70
   3  -9  -1    0.80    0.60
   3  -9  -1    2.60    1.30
   3  -9  -1    3.10    1.40
  -3   9   1    1.70    1.50
  -3   9   1    0.90    0.70
  -3   9   1    2.10    1.40
  -3   9   1    0.70    0.60
  -3   9   1   -0.30    1.20
  -3   9   1    1.60    1.60
   2  -9  -1  157.48    7.20
   2  -9  -1  152.38    5.50
   2  -9  -1  158.08    6.60
  -2   9   1  154.58    6.60
  -2   9   1  154.98    7.10
  -2   9   1  153.88    6.40
  -2   9   1  155.28    7.20
  -2   9   1  149.19    5.50
  -2   9   1  161.88    5.50
  -1   9   1    1.70    1.30
  -1   9   1   -0.60    1.40
  -1   9   1    0.30    1.30
  -1   9   1    0.50    1.30
   0   9   1  127.79    5.80
   0   9   1  128.79    5.70
   0   9   1  120.69    5.50
   0   9   1  118.29    5.80
   1   9   1    3.30    1.60
   1   9   1    4.80    1.60
   1   9   1    4.80    0.60
   1   9   1    3.80    0.50
   1   9   1    4.20    1.40
   1   9   1    3.30    1.60
  -2  -9  -1    2.60    0.60
   2   9   1    1.50    0.60
   2   9   1    2.90    0.70
   2   9   1    1.80    1.50
   2   9   1    2.10    1.50
   2   9   1    1.70    1.40
   2   9   1    3.20    1.30
  -3  -9  -1   31.30    1.80
   3   9   1   31.60    1.80
   3   9   1   35.80    1.70
   3   9   1   39.10    2.90
   3   9   1   33.60    1.90
   3   9   1   33.00    1.70
   3   9   1   32.80    2.50
   3   9   1   36.30    2.90
  -4  -9  -1  232.18    8.20
   4   9   1  228.68    8.10
   4   9   1  233.78    8.20
   4   9   1  219.08    9.40
   4   9   1  239.68    8.10
   4   9   1  184.58    8.10
  -5  -9  -1   71.49    3.30
   5   9   1   65.89    3.70
   5   9   1   68.39    3.90
   5   9   1   75.59    3.40
   5   9   1   76.19    3.30
   5   9   1   65.79    4.10
   5   9   1   68.29    3.40
  -6  -9  -1    8.80    1.00
   6   9   1    7.00    1.70
   6   9   1    8.60    1.50
   6   9   1    6.20    1.80
   6   9   1    9.40    1.60
   6   9   1    8.20    1.40
   6   9   1    8.50    1.70
   6   9   1    8.10    1.30
  -7  -9  -1  186.88    8.00
   7   9   1  194.28    7.90
   7   9   1  196.48    8.40
   7   9   1  180.68    7.30
   7   9   1  162.78    7.90
   7   9   1  181.48    8.00
   7   9   1  181.78    7.50
   8   9   1   86.79    4.60
   8   9   1   87.79    4.50
   8   9   1   86.49    4.90
   8   9   1   94.49    4.80
   8   9   1   91.89    4.70
   8   9   1   85.19    5.10
   9   9   1   -1.70    1.70
   9   9   1   -0.80    1.70
   9   9   1    4.10    2.10
   9   9   1    0.60    1.80
   9   9   1   -0.30    1.50
   9   9   1    2.40    1.70
 -10  -9  -1    6.80    2.10
  10   9   1    7.50    2.20
  10   9   1    7.00    2.30
  10   9   1    8.00    2.20
  10   9   1    8.20    2.50
  10   9   1    5.80    2.00
  10   9   1    3.70    2.00
 -11  -9  -1    4.40    2.00
  11   9   1    6.00    2.30
  11   9   1    6.70    2.50
  11   9   1    4.30    2.00
  11   9   1    5.10    2.60
  11   9   1    9.50    2.20
  11   9   1    0.80    2.20
 -12  -9  -1   17.60    2.60
  12   9   1   12.40    2.70
  12   9   1   13.10    3.30
  12   9   1   12.00    2.80
  12   9   1   11.70    3.00
  12   9   1   15.40    2.50
  12   9   1   13.70    2.60
 -13  -9  -1   15.40    2.60
  13   9   1   14.10    3.00
  13   9   1   16.10    2.80
  13   9   1   15.20    3.90
  13   9   1   15.80    2.80
  13   9   1   12.50    3.00
 -14  -9  -1    4.40    2.20
  14   9   1    3.40    2.20
  14   9   1    3.40    2.30
  14   9   1    5.40    2.90
  14   9   1    0.20    2.60
  14   9   1   14.00    3.70
  14   9   1   -3.60    2.40
  15   9   1    5.00    3.50
  15   9   1   -4.50    3.10
  16   9   1   13.20    4.30
  16   9   1    4.30    3.80
  17   9   1    6.30    3.50
  18   9   1   12.40    5.10
  12 -10  -1    1.80    2.80
  12 -10  -1    2.60    2.00
 -12  10   1   -0.40    2.10
 -12  10   1   -3.10    1.80
  11 -10  -1    1.50    1.70
  11 -10  -1    0.40    2.20
 -11  10   1    1.30    1.90
 -11  10   1    2.20    1.70
  10 -10  -1   39.00    3.20
  10 -10  -1   38.60    4.30
 -10  10   1   41.90    3.30
 -10  10   1   43.30    3.40
   9 -10  -1   31.00    3.80
   9 -10  -1   36.30    3.00
  -9  10   1   38.80    3.00
  -9  10   1   35.40    2.80
   8 -10  -1    1.60    2.20
   8 -10  -1    0.10    1.30
  -8  10   1    1.20    1.30
  -8  10   1    2.90    1.30
  -8  10   1    3.10    2.40
   7 -10  -1   11.30    2.40
   7 -10  -1    6.70    1.50
  -7  10   1    8.50    1.50
  -7  10   1    5.30    2.40
  -7  10   1    9.50    1.50
   6 -10  -1    4.10    1.90
   6 -10  -1    3.80    1.30
  -6  10   1    3.00    1.20
  -6  10   1    4.90    1.30
  -6  10   1    5.60    2.30
   5 -10  -1   -0.10    1.80
   5 -10  -1   -0.90    0.90
   5 -10  -1    1.30    1.50
   5 -10  -1   -0.20    1.40
  -5  10   1   -0.60    0.90
  -5  10   1   -1.70    1.00
  -5  10   1    0.50    0.90
  -5  10   1    0.70    1.00
  -5  10   1    0.60    1.80
  -5  10   1   -0.80    1.30
   4 -10  -1   -1.00    1.30
   4 -10  -1   -2.90    1.40
   4 -10  -1   -0.30    0.70
  -4  10   1    0.50    1.40
  -4  10   1   -0.60    0.70
  -4  10   1   -0.10    1.40
  -4  10   1   -1.50    1.70
  -4  10   1   -1.40    1.30
  -4  10   1   -0.40    0.80
  -4  10   1    0.30    0.80
  -4  10   1   -0.70    0.80
   3 -10  -1   -2.30    1.20
   3 -10  -1   -0.10    0.60
   3 -10  -1   -2.00    1.30
  -3  10   1    0.60    0.70
  -3  10   1   -1.50    1.40
  -3  10   1   -1.60    1.40
  -3  10   1    0.50    0.70
  -3  10   1    0.00    1.50
  -3  10   1   -0.60    1.60
   2 -10  -1    1.50    0.50
   2 -10  -1    1.40    1.40
   2 -10  -1    3.00    1.40
  -2  10   1    1.30    1.40
  -2  10   1    1.10    0.50
  -2  10   1   -0.40    1.20
  -2  10   1   -1.20    1.30
  -2  10   1    2.10    0.50
  -2  10   1   -1.10    1.50
   1 -10  -1    1.20    1.40
   1 -10  -1    2.00    1.60
  -1  10   1    2.60    1.50
  -1  10   1    0.70    1.40
  -1  10   1    2.20    1.70
  -1  10   1    0.60    1.50
   0  10   1    1.70    1.40
   0  10   1   -1.70    1.30
   0  10   1   -3.70    1.30
   0  10   1    0.80    1.50
  -1 -10  -1    9.50    0.70
   1  10   1   11.10    1.90
   1  10   1    8.90    0.70
   1  10   1    8.90    1.70
   1  10   1    9.30    1.80
   1  10   1    9.70    1.70
   1  10   1    8.90    0.70
  -2 -10  -1    0.10    0.60
   2  10   1   -0.10    1.30
   2  10   1    0.00    0.60
   2  10   1   -1.10    0.60
   2  10   1    0.40    1.40
   2  10   1    0.60    1.30
   2  10   1    1.70    1.50
  -3 -10  -1    0.50    0.70
   3  10   1    1.50    0.80
   3  10   1   -0.90    1.20
   3  10   1   -0.20    0.70
   3  10   1    0.20    0.70
   3  10   1    0.30    1.50
   3  10   1    1.60    1.30
   3  10   1    0.00    0.70
   3  10   1    2.10    1.30
  -4 -10  -1   12.40    1.20
   4  10   1   11.70    1.20
   4  10   1   12.00    1.30
   4  10   1   13.30    1.20
   4  10   1   11.10    2.00
   4  10   1   13.90    1.30
   4  10   1   12.30    1.70
   4  10   1   13.30    1.90
   4  10   1   13.30    2.00
  -5 -10  -1   13.20    1.40
   5  10   1   10.70    2.10
   5  10   1   13.20    1.50
   5  10   1   11.30    1.70
   5  10   1   10.30    1.30
   5  10   1   12.70    1.90
   5  10   1   13.90    1.40
   5  10   1    9.30    1.60
  -6 -10  -1    3.80    1.10
   6  10   1    5.10    1.70
   6  10   1    2.20    1.50
   6  10   1    3.70    1.20
   6  10   1    1.30    1.00
   6  10   1    6.70    1.90
   6  10   1    4.20    1.80
   6  10   1    3.50    1.10
   6  10   1    4.00    1.50
  -7 -10  -1   41.00    2.60
   7  10   1   50.99    3.60
   7  10   1   45.00    3.10
   7  10   1   42.60    2.80
   7  10   1   42.00    3.00
   7  10   1   39.90    3.00
   7  10   1   40.70    2.60
   7  10   1   45.20    3.60
   7  10   1   43.00    3.50
  -8 -10  -1   21.80    2.10
   8  10   1   22.30    2.80
   8  10   1   25.60    2.90
   8  10   1   22.70    2.70
   8  10   1   21.00    2.30
   8  10   1   20.90    2.50
   8  10   1   20.60    2.30
   9  10   1   21.90    2.50
   9  10   1   18.40    2.40
   9  10   1   18.10    2.50
   9  10   1   18.20    2.80
   9  10   1   19.20    2.50
   9  10   1   23.80    2.90
 -10 -10  -1   10.00    2.40
  10  10   1    9.50    2.20
  10  10   1    9.90    2.30
  10  10   1   11.30    2.40
  10  10   1    8.60    2.20
  10  10   1    6.40    2.20
  10  10   1    6.60    2.70
 -11 -10  -1    1.80    2.10
  11  10   1    2.40    2.60
  11  10   1    2.50    2.10
  11  10   1   -1.20    1.90
  11  10   1    3.00    2.10
  11  10   1    4.40    2.30
  11  10   1    1.00    2.20
 -12 -10  -1   26.90    3.20
  12  10   1   27.30    3.20
  12  10   1   21.70    3.30
  12  10   1   23.50    3.30
  12  10   1   22.30    3.70
  12  10   1   20.70    3.10
  12  10   1   19.60    3.00
 -13 -10  -1    3.10    2.40
  13  10   1    0.00    2.40
  13  10   1    5.70    3.20
  13  10   1    1.00    2.50
  13  10   1    3.50    2.90
  13  10   1   -0.60    2.00
  13  10   1    1.00    2.20
 -14 -10  -1    0.30    2.30
  14  10   1   -1.70    2.20
  14  10   1    4.20    2.80
  14  10   1    0.10    2.10
  14  10   1    4.70    3.10
  14  10   1    1.80    3.00
  14  10   1   -0.70    2.40
 -15 -10  -1    8.60    2.60
  15  10   1    2.40    3.00
  15  10   1    2.50    3.40
  15  10   1    7.20    2.60
  16  10   1    1.40    3.60
  17  10   1    1.80    3.90
  11 -11  -1    3.30    1.80
  11 -11  -1    0.80    2.90
 -11  11   1    1.10    1.80
 -11  11   1    2.40    1.80
  10 -11  -1    9.20    2.00
  10 -11  -1   10.90    3.20
 -10  11   1   10.90    2.00
 -10  11   1   11.00    2.10
   9 -11  -1    3.70    2.70
   9 -11  -1    4.30    1.60
  -9  11   1    3.60    1.60
  -9  11   1    2.40    1.60
   8 -11  -1   16.90    3.00
   8 -11  -1   20.10    2.20
  -8  11   1   16.30    2.10
  -8  11   1   25.50    3.60
  -8  11   1   21.10    2.10
   7 -11  -1   32.10    2.60
   7 -11  -1   30.30    3.70
  -7  11   1   30.40    2.40
  -7  11   1   27.80    2.30
  -7  11   1   29.40    3.60
   6 -11  -1   12.90    1.60
   6 -11  -1   13.60    2.70
  -6  11   1   12.80    2.50
  -6  11   1   15.20    1.60
  -6  11   1   11.50    1.50
   5 -11  -1   28.80    3.30
   5 -11  -1   32.80    2.80
   5 -11  -1   27.00    2.10
  -5  11   1   29.70    2.20
  -5  11   1   31.10    3.40
  -5  11   1   33.30    2.80
  -5  11   1   29.70    2.00
  -5  11   1   32.50    2.10
   4 -11  -1    8.60    2.10
   4 -11  -1    7.20    1.00
   4 -11  -1    9.40    1.90
  -4  11   1    7.80    2.00
  -4  11   1    7.00    1.80
  -4  11   1    7.50    1.00
  -4  11   1    7.60    2.20
  -4  11   1    6.50    1.10
  -4  11   1    7.50    1.10
  -4  11   1    7.10    0.90
  -4  11   1    4.10    1.70
   3 -11  -1   55.99    3.90
   3 -11  -1   53.59    2.40
   3 -11  -1   56.19    3.60
  -3  11   1   56.39    2.40
  -3  11   1   52.89    2.40
  -3  11   1   52.49    3.60
  -3  11   1   59.49    4.10
  -3  11   1   54.79    3.60
  -3  11   1   52.99    4.00
   2 -11  -1    5.90    0.60
   2 -11  -1    7.60    1.70
   2 -11  -1    8.00    1.90
  -2  11   1    5.90    2.00
  -2  11   1    8.80    1.90
  -2  11   1    5.70    1.90
  -2  11   1    6.00    1.80
   1 -11  -1   31.50    2.80
   1 -11  -1   32.20    2.90
  -1  11   1   31.10    2.80
  -1  11   1   38.00    3.10
  -1  11   1   32.80    3.00
  -1  11   1   36.00    3.10
   0 -11  -1    0.50    1.50
   0  11   1    0.30    1.60
   0  11   1   -1.20    1.30
   0  11   1    0.90    1.60
   0  11   1   -0.30    1.20
  -1 -11  -1    0.50    1.60
  -1 -11  -1   -0.20    0.40
   1  11   1    0.30    0.40
   1  11   1   -0.50    1.60
   1  11   1   -1.70    1.20
   1  11   1    0.90    0.50
   1  11   1    0.50    1.60
   1  11   1    1.40    1.30
  -2 -11  -1   86.59    3.40
   2  11   1   86.19    4.60
   2  11   1   86.69    4.60
   2  11   1   95.19    5.00
   2  11   1   86.39    3.50
   2  11   1   89.39    4.80
   2  11   1   94.89    3.50
  -3 -11  -1   89.09    3.60
   3  11   1   90.79    4.70
   3  11   1   88.99    4.90
   3  11   1   85.39    3.70
   3  11   1   84.59    4.80
   3  11   1   89.69    4.60
   3  11   1   85.89    3.40
  -4 -11  -1   23.70    1.70
   4  11   1   19.40    2.70
   4  11   1   26.50    2.60
   4  11   1   21.20    1.80
   4  11   1   28.40    1.70
   4  11   1   23.30    2.40
   4  11   1   24.00    1.90
   4  11   1   23.00    1.80
   4  11   1   24.70    2.30
  -5 -11  -1    7.40    1.20
   5  11   1    5.70    1.20
   5  11   1    6.70    1.20
   5  11   1    5.50    1.20
   5  11   1    5.00    2.00
   5  11   1    4.80    1.60
  -6 -11  -1   36.50    2.40
   6  11   1   31.50    2.90
   6  11   1   37.90    2.40
   6  11   1   38.60    2.50
   6  11   1   35.40    3.20
  -7 -11  -1   37.80    2.30
   7  11   1   31.70    3.30
   7  11   1   33.40    2.70
   7  11   1   30.90    2.80
   7  11   1   36.40    3.30
   7  11   1   33.50    2.60
   7  11   1   35.80    3.30
  -8 -11  -1  120.39    5.60
   8  11   1  122.29    6.30
   8  11   1  113.59    5.40
   8  11   1  109.39    5.40
   8  11   1  111.19    5.70
   8  11   1  110.99    5.80
   8  11   1  119.79    6.30
  -9 -11  -1   14.70    2.70
   9  11   1   23.50    2.60
   9  11   1   16.90    2.60
   9  11   1   16.80    2.50
   9  11   1   19.10    2.80
   9  11   1   14.70    2.40
   9  11   1   13.90    2.80
 -10 -11  -1    2.90    2.00
  10  11   1    1.10    2.30
  10  11   1    7.40    2.30
  10  11   1    1.00    2.10
  10  11   1    5.70    2.10
  10  11   1    5.90    2.20
  10  11   1    6.00    2.00
 -11 -11  -1    0.10    2.20
  11  11   1    0.80    2.10
  11  11   1    0.30    2.40
  11  11   1    0.00    2.20
  11  11   1    3.80    2.20
  11  11   1   -0.40    1.80
  11  11   1    2.30    1.90
 -12 -11  -1    7.60    2.50
  12  11   1    5.60    2.30
  12  11   1    5.50    2.60
  12  11   1    8.80    2.70
  12  11   1    7.20    2.50
  12  11   1    4.50    2.40
  12  11   1    3.10    2.80
 -13 -11  -1   15.30    2.90
  13  11   1   14.40    3.20
  13  11   1   17.60    3.00
  13  11   1   10.90    2.90
  13  11   1   13.00    3.10
  13  11   1   15.10    3.50
  13  11   1   16.50    3.20
 -14 -11  -1    5.80    2.60
  14  11   1    6.50    3.00
  14  11   1    4.90    2.80
  14  11   1    6.60    2.50
  14  11   1    8.40    2.70
  14  11   1    8.90    3.40
 -15 -11  -1    1.20    2.40
  15  11   1   -2.70    2.50
  15  11   1   -0.50    2.40
  15  11   1    3.20    3.00
  15  11   1   -0.20    3.00
  15  11   1    0.30    3.30
  16  11   1   -7.90    3.30
  17  11   1   -3.90    3.80
  10 -12  -1    1.70    2.80
  10 -12  -1    1.80    1.70
 -10  12   1    0.30    1.80
 -10  12   1    4.40    1.80
   9 -12  -1    1.70    2.60
   9 -12  -1    3.40    1.80
  -9  12   1    5.90    1.80
  -9  12   1    5.60    1.90
   8 -12  -1    2.10    1.60
   8 -12  -1    1.30    2.10
  -8  12   1    1.00    1.50
  -8  12   1   -1.10    1.30
  -8  12   1   -1.10    2.40
   7 -12  -1   27.40    3.70
   7 -12  -1   23.70    2.20
  -7  12   1   23.70    3.50
  -7  12   1   21.40    2.10
  -7  12   1   26.50    2.10
   6 -12  -1   12.40    2.80
   6 -12  -1   15.10    1.70
  -6  12   1   12.60    1.60
  -6  12   1   13.70    1.60
  -6  12   1   14.50    2.90
   5 -12  -1    5.90    1.20
   5 -12  -1    5.70    2.20
  -5  12   1    6.70    2.30
  -5  12   1    7.30    1.20
  -5  12   1    6.80    1.30
   4 -12  -1   -2.30    1.70
   4 -12  -1   -1.20    0.80
   4 -12  -1   -1.40    1.50
  -4  12   1    1.70    2.00
  -4  12   1   -1.40    1.90
  -4  12   1   -1.70    0.80
  -4  12   1   -3.00    0.80
  -4  12   1   -2.10    0.80
  -4  12   1   -1.50    1.60
  -4  12   1   -2.90    1.50
  -4  12   1    0.30    0.90
   3 -12  -1   14.60    2.50
   3 -12  -1   13.20    1.10
   3 -12  -1   14.80    2.30
  -3  12   1   15.30    1.20
  -3  12   1   14.60    2.20
  -3  12   1   15.50    2.60
  -3  12   1   15.80    2.40
  -3  12   1   12.10    2.50
  -3  12   1   17.40    1.30
   2 -12  -1    0.00    1.50
   2 -12  -1   -0.30    1.60
  -2  12   1    1.10    1.70
  -2  12   1   -0.40    1.60
  -2  12   1   -0.90    1.80
  -2  12   1    0.00    1.60
   1 -12  -1    0.60    1.50
   1 -12  -1    0.60    1.60
  -1  12   1    1.60    1.70
  -1  12   1    0.90    1.80
  -1  12   1   -0.40    1.60
  -1  12   1    1.90    1.70
   0 -12  -1   11.90    2.20
   0  12   1    8.70    1.90
   0  12   1    9.30    2.20
   0  12   1   10.40    2.10
   0  12   1    8.90    2.00
  -1 -12  -1    3.40    1.90
  -1 -12  -1    3.90    0.60
   1  12   1    3.30    1.60
   1  12   1    7.60    2.00
   1  12   1    4.40    1.60
   1  12   1    4.00    0.60
   1  12   1    6.00    1.90
   1  12   1    6.30    0.70
  -2 -12  -1   21.90    2.70
  -2 -12  -1   19.10    1.30
   2  12   1   22.20    1.50
   2  12   1   23.50    2.60
   2  12   1   21.80    2.60
   2  12   1   17.90    2.30
   2  12   1   18.80    2.50
   2  12   1   21.20    1.50
  -3 -12  -1    4.30    0.90
  -3 -12  -1    3.10    1.80
   3  12   1    4.60    2.00
   3  12   1    2.70    0.90
   3  12   1    2.80    1.80
   3  12   1    5.40    1.00
   3  12   1    4.60    0.90
   3  12   1    3.40    1.50
   3  12   1    0.10    1.70
   3  12   1    4.00    0.80
  -4 -12  -1    0.30    0.80
   4  12   1    2.10    1.60
   4  12   1    0.50    1.00
   4  12   1   -0.20    0.70
   4  12   1   -0.90    1.80
   4  12   1    0.70    0.90
   4  12   1   -0.60    0.60
   4  12   1    4.60    2.00
   4  12   1    0.20    1.40
  -5 -12  -1   21.60    1.80
   5  12   1   20.90    2.30
   5  12   1   22.20    1.80
   5  12   1   21.70    1.90
   5  12   1   24.70    2.80
   5  12   1   23.00    1.90
  -7 -12  -1   11.60    2.30
   7  12   1   13.30    2.70
   7  12   1    5.90    2.00
   7  12   1   10.80    1.70
   7  12   1    7.60    1.90
   7  12   1    8.60    1.80
   7  12   1    8.30    2.30
  -8 -12  -1   19.00    1.90
  -8 -12  -1   15.40    3.00
   8  12   1   14.40    2.40
   8  12   1   15.40    2.80
   8  12   1   17.10    2.70
   8  12   1   18.60    2.30
   8  12   1   15.20    2.30
   8  12   1   19.60    2.90
  -9 -12  -1   14.40    2.00
  -9 -12  -1    8.60    2.70
   9  12   1   10.40    2.20
   9  12   1   11.30    2.50
   9  12   1    6.60    2.50
   9  12   1   11.70    2.30
   9  12   1   10.40    2.70
   9  12   1   11.20    2.40
 -10 -12  -1   19.70    3.20
  10  12   1   21.80    3.00
  10  12   1   20.70    3.20
  10  12   1   21.30    2.80
  10  12   1   20.70    3.20
  10  12   1   13.70    3.00
  10  12   1   18.70    2.60
 -11 -12  -1   37.90    4.00
  11  12   1   34.50    3.70
  11  12   1   34.70    3.80
  11  12   1   36.80    3.90
  11  12   1   35.50    3.40
  11  12   1   29.00    3.80
  11  12   1   35.10    3.50
 -12 -12  -1    5.20    2.50
  12  12   1    2.50    2.50
  12  12   1    1.20    2.70
  12  12   1    6.10    2.60
  12  12   1    2.00    2.50
  12  12   1    5.20    2.30
  12  12   1    4.60    2.60
 -13 -12  -1    9.20    2.90
  13  12   1    7.20    2.90
  13  12   1    8.30    2.70
  13  12   1    3.80    2.60
  13  12   1    3.40    2.90
  13  12   1    4.80    2.70
 -14 -12  -1    1.50    2.50
  14  12   1   -2.70    2.30
  14  12   1    3.80    2.70
  14  12   1   -2.30    2.60
  14  12   1   -1.20    3.00
  14  12   1    0.00    2.30
 -15 -12  -1   -3.70    2.50
  15  12   1   -0.30    2.40
  15  12   1   -0.60    2.90
  15  12   1    0.30    2.30
  15  12   1   -0.70    3.10
  15  12   1   -0.80    2.80
  16  12   1    6.40    3.70
  16  12   1   -1.50    2.60
  17  12   1   -4.80    3.60
  10 -13  -1    0.20    2.80
  10 -13  -1   -0.90    1.80
 -10  13   1    0.10    1.90
 -10  13   1   -0.70    1.90
   9 -13  -1    0.30    1.70
   9 -13  -1    2.40    2.70
  -9  13   1    0.40    1.80
  -9  13   1    2.10    1.70
   8 -13  -1   14.70    2.10
   8 -13  -1   15.20    3.30
  -8  13   1   17.00    2.00
  -8  13   1   10.80    2.00
  -8  13   1   10.70    3.20
   7 -13  -1    7.00    1.60
   7 -13  -1    9.20    2.60
  -7  13   1   12.60    1.70
  -7  13   1   10.10    2.90
  -7  13   1   10.10    1.70
   6 -13  -1    2.50    2.50
   6 -13  -1    4.80    1.30
  -6  13   1    6.80    1.40
  -6  13   1    7.40    2.60
  -6  13   1    6.20    1.40
   5 -13  -1   -0.30    2.00
   5 -13  -1    1.80    1.00
  -5  13   1    2.10    1.00
  -5  13   1    1.30    1.10
  -5  13   1   -0.80    2.00
   4 -13  -1    0.80    2.00
   4 -13  -1    1.60    0.90
  -4  13   1    1.90    1.80
  -4  13   1    2.40    0.90
  -4  13   1    2.60    2.30
  -4  13   1    1.20    1.90
  -4  13   1   -0.30    2.00
  -4  13   1    1.50    1.00
  -4  13   1    1.50    0.90
  -4  13   1    3.70    0.90
   3 -13  -1   44.20    3.90
   3 -13  -1   48.40    2.20
   3 -13  -1   48.10    3.70
  -3  13   1   51.79    4.20
  -3  13   1   53.29    3.80
  -3  13   1   41.00    3.50
  -3  13   1   51.79    2.30
  -3  13   1   45.30    4.10
  -3  13   1   47.20    2.20
   2 -13  -1    5.90    1.90
   2 -13  -1    5.90    2.10
  -2  13   1    6.90    2.20
  -2  13   1    6.40    2.10
  -2  13   1    8.60    2.60
  -2  13   1    8.10    2.10
   1 -13  -1   33.10    3.20
   1 -13  -1   29.40    3.10
  -1  13   1   24.30    3.00
  -1  13   1   28.30    3.20
  -1  13   1   28.80    3.10
  -1  13   1   32.00    3.10
   0 -13  -1    2.20    1.80
   0  13   1    0.90    1.80
   0  13   1    1.30    1.80
   0  13   1    0.60    1.90
   0  13   1   -1.60    1.70
  -1 -13  -1   29.40    1.40
  -1 -13  -1   34.70    3.20
   1  13   1   30.40    3.10
   1  13   1   34.30    1.60
   1  13   1   31.80    3.20
   1  13   1   31.60    3.10
   1  13   1   31.90    3.20
   1  13   1   32.30    1.50
  -2 -13  -1   30.80    1.70
  -2 -13  -1   43.50    3.70
   2  13   1   31.20    3.10
   2  13   1   28.60    2.90
   2  13   1   34.10    1.90
   2  13   1   30.70    1.80
   2  13   1   38.10    3.40
   2  13   1   32.40    3.40
  -3 -13  -1    3.00    2.10
  -3 -13  -1    0.60    0.80
   3  13   1    2.40    1.90
   3  13   1    1.40    1.00
   3  13   1    1.90    2.00
   3  13   1    0.50    1.40
   3  13   1    1.20    0.90
   3  13   1    3.20    2.00
   3  13   1    0.80    0.80
   3  13   1    0.50    0.80
  -4 -13  -1    2.20    1.00
  -4 -13  -1    0.20    2.20
   4  13   1    1.50    1.10
   4  13   1    2.00    0.90
   4  13   1    1.80    1.10
   4  13   1   -0.20    2.00
   4  13   1    2.30    1.90
   4  13   1    1.60    1.70
   4  13   1    4.40    1.90
   4  13   1   -0.40    1.00
  -5 -13  -1   58.79    4.20
   5  13   1   64.99    4.30
   5  13   1   65.29    4.50
   5  13   1   61.39    4.40
   5  13   1   57.29    3.80
   5  13   1   58.29    3.20
   5  13   1   59.19    3.20
   5  13   1   58.99    3.10
  -6 -13  -1  115.69    6.20
   6  13   1  120.39    6.00
   6  13   1  124.79    5.30
   6  13   1  116.09    6.00
   6  13   1  122.69    5.20
   6  13   1  117.09    6.40
   6  13   1  119.09    6.40
  -7 -13  -1  155.28    7.80
   7  13   1  161.38    7.40
   7  13   1  151.68    7.60
   7  13   1  156.38    6.80
   7  13   1  159.88    6.50
   7  13   1  154.68    8.00
   7  13   1  154.08    7.70
  -8 -13  -1   -3.10    2.10
   8  13   1   -0.30    1.80
   8  13   1   -0.60    1.70
   8  13   1   -0.30    2.00
   8  13   1    2.20    1.90
   8  13   1   -2.30    2.10
   8  13   1    1.50    2.00
  -9 -13  -1   84.29    4.80
  -9 -13  -1   73.09    5.50
   9  13   1   79.39    4.80
   9  13   1   78.99    5.20
   9  13   1   80.29    4.70
   9  13   1   76.89    5.40
   9  13   1   80.99    4.90
   9  13   1   70.49    5.00
 -10 -13  -1    0.70    2.50
  10  13   1   -4.10    2.30
  10  13   1    0.40    2.00
  10  13   1   -1.30    2.00
  10  13   1    0.90    2.00
  10  13   1    4.60    2.30
  10  13   1    3.30    2.60
 -11 -13  -1   -1.40    2.10
  11  13   1   -2.30    2.30
  11  13   1    1.80    2.60
  11  13   1   -1.00    2.40
  11  13   1    1.10    2.30
  11  13   1   -0.10    2.50
 -12 -13  -1    9.70    2.80
  12  13   1    4.50    2.90
  12  13   1    6.20    2.80
  12  13   1    2.90    2.70
  12  13   1    4.30    2.30
  12  13   1    3.90    2.60
 -13 -13  -1    2.10    2.60
  13  13   1   -2.80    2.50
  13  13   1    2.10    2.80
  13  13   1   -0.30    2.40
  13  13   1    0.80    2.80
  13  13   1    4.70    2.60
 -14 -13  -1    5.20    2.70
  14  13   1    9.10    2.90
  14  13   1    7.40    3.20
  14  13   1    8.00    3.30
  14  13   1    3.90    2.90
  14  13   1    6.50    2.80
 -15 -13  -1    0.20    2.90
  15  13   1   -0.40    2.70
  15  13   1    3.30    2.80
  15  13   1   -0.10    2.50
  15  13   1    1.30    3.30
  15  13   1   -3.30    2.90
 -16 -13  -1    4.10    2.80
  16  13   1   -0.60    2.50
  16  13   1    5.30    3.50
  16  13   1    4.40    3.10
  16  13   1    3.00    3.30
  16  13   1   -4.40    2.80
   9 -14  -1    1.30    1.80
   9 -14  -1    3.00    2.60
  -9  14   1    3.00    2.00
  -9  14   1    3.90    1.90
   8 -14  -1    4.70    1.70
   8 -14  -1    3.10    2.30
  -8  14   1    2.20    1.60
  -8  14   1    4.30    1.80
  -8  14   1    5.40    2.90
   7 -14  -1   -0.40    1.30
   7 -14  -1   -2.30    2.30
  -7  14   1    2.50    1.40
  -7  14   1    2.40    1.50
  -7  14   1    0.20    2.10
   6 -14  -1    2.70    2.40
   6 -14  -1    1.60    1.30
  -6  14   1    2.50    2.40
  -6  14   1    1.30    1.20
  -6  14   1    2.00    1.30
   5 -14  -1    4.40    1.20
   5 -14  -1    2.70    2.30
  -5  14   1    2.80    2.30
  -5  14   1    3.90    1.10
  -5  14   1    5.40    1.20
   4 -14  -1   -1.40    1.90
   4 -14  -1    3.60    0.90
  -4  14   1    2.60    2.20
  -4  14   1    2.10    2.40
  -4  14   1    5.50    1.00
  -4  14   1    4.20    1.00
   3 -14  -1    0.10    0.70
   3 -14  -1   -2.50    1.70
   3 -14  -1    0.60    1.80
  -3  14   1    2.80    2.10
  -3  14   1    0.10    0.70
  -3  14   1    0.40    0.80
  -3  14   1   -1.00    2.00
  -3  14   1   -1.40    2.30
  -3  14   1    0.40    2.00
   2 -14  -1   16.00    2.50
   2 -14  -1   17.40    2.70
  -2  14   1   13.80    2.70
  -2  14   1   11.30    2.70
  -2  14   1    9.90    2.30
  -2  14   1   14.00    2.80
   1 -14  -1   35.20    3.40
   1 -14  -1   35.20    3.50
  -1  14   1   39.30    3.50
  -1  14   1   28.30    3.30
  -1  14   1   32.00    3.60
  -1  14   1   33.20    3.50
   0 -14  -1   -1.40    1.70
   0 -14  -1    0.20    1.80
   0  14   1    1.90    2.00
   0  14   1   -2.20    1.90
   0  14   1    0.70    1.90
   0  14   1    0.20    2.00
  -1 -14  -1    6.00    2.30
  -1 -14  -1    5.00    0.70
   1  14   1    9.60    2.40
   1  14   1    5.30    0.80
   1  14   1    7.80    2.40
   1  14   1    6.00    2.20
   1  14   1    5.10    0.80
   1  14   1    5.60    2.00
  -2 -14  -1   -0.20    0.70
  -2 -14  -1    3.20    1.90
   2  14   1    1.90    1.80
   2  14   1    0.30    1.80
   2  14   1    2.30    1.90
   2  14   1   -0.20    0.80
   2  14   1    0.50    0.80
   2  14   1    1.40    1.90
  -3 -14  -1   62.59    2.90
  -3 -14  -1   61.09    4.40
   3  14   1   66.09    2.90
   3  14   1   64.19    4.60
   3  14   1   69.29    2.90
   3  14   1   65.49    3.00
   3  14   1   66.59    4.60
   3  14   1   62.09    4.70
   3  14   1   62.19    4.30
   3  14   1   64.09    3.10
  -4 -14  -1   18.00    1.60
  -4 -14  -1   19.60    2.90
   4  14   1   18.50    2.80
   4  14   1   17.80    1.80
   4  14   1   18.30    2.80
   4  14   1   17.60    2.40
   4  14   1   14.70    2.60
   4  14   1   18.40    1.70
   4  14   1   16.90    1.50
   4  14   1   19.90    1.70
  -5 -14  -1   47.00    4.10
   5  14   1   49.70    4.20
   5  14   1   52.79    4.50
   5  14   1   57.19    4.30
   5  14   1   53.99    3.10
   5  14   1   57.59    3.90
   5  14   1   51.19    3.10
  -6 -14  -1    1.70    2.10
   6  14   1    3.80    2.20
   6  14   1    4.20    2.10
   6  14   1    5.10    1.50
   6  14   1    2.80    1.90
   6  14   1    9.30    2.60
   6  14   1    7.20    1.60
  -7 -14  -1   60.89    4.50
   7  14   1   45.90    4.00
   7  14   1   57.49    4.50
   7  14   1   48.30    3.20
   7  14   1   48.00    4.20
   7  14   1   46.80    3.40
   7  14   1   51.69    3.80
  -8 -14  -1    2.80    2.50
   8  14   1    8.70    2.10
   8  14   1   10.10    2.00
   8  14   1    7.60    2.80
   8  14   1    9.10    2.10
   8  14   1    6.50    2.80
   8  14   1    9.10    2.80
  -9 -14  -1   38.20    4.20
   9  14   1   40.90    3.60
   9  14   1   41.30    4.10
   9  14   1   43.60    3.50
   9  14   1   46.70    4.40
   9  14   1   46.90    4.40
 -10 -14  -1   16.60    3.30
  10  14   1   16.80    2.80
  10  14   1   13.00    3.10
  10  14   1   14.50    3.00
  10  14   1   16.80    3.30
  10  14   1   17.00    2.70
 -11 -14  -1    1.50    2.60
  11  14   1   -0.60    2.50
  11  14   1    1.30    2.20
  11  14   1   -3.60    2.70
  11  14   1    0.70    2.60
  11  14   1    1.40    2.40
 -12 -14  -1    0.10    2.70
  12  14   1    0.00    2.90
  12  14   1    0.20    2.50
  12  14   1    3.20    2.50
  12  14   1    0.40    2.40
  12  14   1    1.90    2.60
 -13 -14  -1   32.20    3.90
  13  14   1   36.30    4.10
  13  14   1   26.20    3.70
  13  14   1   31.40    4.00
  13  14   1   25.90    4.20
  13  14   1   26.70    3.70
 -14 -14  -1   12.60    3.40
  14  14   1   12.60    3.40
  14  14   1   11.50    3.20
  14  14   1   12.20    3.60
  14  14   1   11.80    3.30
  14  14   1   13.00    3.40
 -15 -14  -1   -3.90    2.50
  15  14   1    0.90    3.10
  15  14   1    1.90    2.60
  15  14   1   -1.70    3.00
  15  14   1    1.40    2.90
  15  14   1    0.40    2.80
 -16 -14  -1    0.50    2.90
  16  14   1    2.00    3.40
  16  14   1    3.00    3.00
  16  14   1   -0.30    3.30
  16  14   1   -2.50    2.90
  16  14   1    1.10    3.10
   8 -15  -1    7.20    3.10
   8 -15  -1    4.40    1.70
  -8  15   1   -0.60    1.70
  -8  15   1    2.70    1.90
   7 -15  -1    3.80    1.50
   7 -15  -1    7.20    2.80
  -7  15   1    6.70    1.70
  -7  15   1    5.10    1.70
  -7  15   1    7.60    2.90
   6 -15  -1    1.50    1.20
   6 -15  -1    2.70    2.40
  -6  15   1    0.30    1.40
  -6  15   1   -1.50    1.20
  -6  15   1   -6.00    2.20
   5 -15  -1   -0.30    1.00
   5 -15  -1    1.40    2.30
  -5  15   1    0.00    1.10
  -5  15   1   -1.20    2.20
  -5  15   1    0.80    1.10
   4 -15  -1    3.90    2.20
   4 -15  -1    1.60    0.90
  -4  15   1    1.10    0.90
  -4  15   1    1.00    1.00
  -4  15   1    0.90    2.40
  -4  15   1   -0.20    2.10
   3 -15  -1   -1.00    2.00
   3 -15  -1    0.50    1.90
   3 -15  -1    0.20    0.70
  -3  15   1    0.70    0.80
  -3  15   1   -0.60    1.90
  -3  15   1   -0.80    2.10
  -3  15   1    1.70    2.40
  -3  15   1    0.70    0.70
  -3  15   1    2.00    2.20
   2 -15  -1    6.00    2.30
   2 -15  -1    5.10    2.20
  -2  15   1    9.40    2.80
  -2  15   1    8.60    2.40
  -2  15   1    7.80    2.40
  -2  15   1    4.40    2.40
   1 -15  -1    4.20    2.20
   1 -15  -1    5.90    2.40
  -1  15   1    3.80    2.10
  -1  15   1    5.50    2.60
  -1  15   1    8.30    2.50
  -1  15   1    8.60    2.60
   0 -15  -1   30.60    3.50
   0 -15  -1   34.80    3.40
   0  15   1   30.20    3.60
   0  15   1   32.40    3.50
   0  15   1   28.00    3.40
   0  15   1   33.90    3.60
  -1 -15  -1    3.70    2.30
   1  15   1    2.30    1.90
   1  15   1    6.10    2.40
   1  15   1    0.60    2.20
   1  15   1    3.80    2.30
  -2 -15  -1    3.90    2.40
  -2 -15  -1    4.70    0.90
   2  15   1    5.20    0.80
   2  15   1    4.50    2.10
   2  15   1    3.00    0.90
   2  15   1    5.20    2.40
   2  15   1    3.60    1.00
   2  15   1    6.70    2.60
   2  15   1    4.80    2.10
  -3 -15  -1    9.30    2.80
  -3 -15  -1    9.10    1.20
   3  15   1    7.70    2.30
   3  15   1   10.40    2.70
   3  15   1   10.60    1.30
   3  15   1   10.10    2.20
   3  15   1    9.50    1.30
   3  15   1    9.40    1.30
   3  15   1    7.10    1.10
   3  15   1    9.70    2.60
  -4 -15  -1    2.70    2.20
   4  15   1    0.20    1.20
   4  15   1   -0.60    1.90
   4  15   1    1.10    2.40
   4  15   1   -0.50    1.70
   4  15   1    1.00    2.10
   4  15   1   -0.50    1.20
  -5 -15  -1   52.79    4.60
   5  15   1   37.20    3.50
   5  15   1   48.60    4.40
   5  15   1   38.20    2.90
   5  15   1   45.80    2.90
   5  15   1   44.40    4.10
   5  15   1   37.10    3.80
  -6 -15  -1    0.80    2.10
   6  15   1    2.70    2.30
   6  15   1    0.30    1.40
   6  15   1   -1.90    1.70
   6  15   1   -3.20    2.10
   6  15   1    0.70    1.40
   6  15   1    0.10    2.10
  -7 -15  -1    5.20    2.20
   7  15   1    5.80    2.00
   7  15   1    5.70    2.80
   7  15   1    9.20    1.80
   7  15   1    2.40    2.30
   7  15   1    6.20    1.70
   7  15   1    8.40    2.10
  -8 -15  -1    9.50    2.50
   8  15   1   11.10    2.70
   8  15   1   14.90    3.10
   8  15   1    7.10    2.30
   8  15   1   11.90    2.20
   8  15   1   12.70    2.00
  -9 -15  -1   13.70    2.90
   9  15   1   12.90    3.10
   9  15   1   19.60    3.40
   9  15   1   15.40    2.60
   9  15   1   14.60    2.50
   9  15   1   17.00    3.30
 -10 -15  -1   -2.00    2.40
  10  15   1    0.40    2.20
  10  15   1    1.80    2.60
  10  15   1    1.50    2.20
  10  15   1    6.80    2.80
  10  15   1    0.10    2.20
 -11 -15  -1    2.80    2.80
  11  15   1    3.40    2.70
  11  15   1    4.90    2.50
  11  15   1    1.30    2.40
  11  15   1   -1.60    2.60
  11  15   1   -0.90    2.30
 -12 -15  -1    1.40    2.70
  12  15   1    1.70    2.80
  12  15   1   -2.00    2.50
  12  15   1    0.40    2.70
  12  15   1    4.80    2.70
  12  15   1   -2.40    2.50
 -13 -15  -1    4.80    3.10
  13  15   1    1.70    2.70
  13  15   1    0.00    2.70
  13  15   1    1.90    2.60
  13  15   1   -4.40    2.50
  13  15   1    0.50    2.80
 -14 -15  -1   -3.80    2.80
  14  15   1   -0.70    3.00
  14  15   1    1.80    2.90
  14  15   1   -1.30    2.90
  14  15   1   -0.10    2.90
  14  15   1    7.00    3.00
 -15 -15  -1    6.30    3.20
  15  15   1    2.60    2.80
  15  15   1    5.20    3.30
  15  15   1    4.30    3.30
  15  15   1    7.30    3.70
  15  15   1    6.00    3.20
 -16 -15  -1    0.50    3.00
  16  15   1    1.80    3.40
  16  15   1    0.80    3.00
  16  15   1    2.70    3.20
  16  15   1    1.00    3.60
  16  15   1    2.00    2.90
   6 -16  -1    2.40    1.30
   6 -16  -1    0.70    2.50
  -6  16   1    1.40    2.60
  -6  16   1    1.20    1.40
  -6  16   1    1.20    1.40
   5 -16  -1    8.00    2.80
   5 -16  -1   10.40    1.40
  -5  16   1    9.50    1.40
  -5  16   1   10.00    1.40
  -5  16   1   15.90    3.30
   4 -16  -1    1.10    0.80
   4 -16  -1   -1.70    2.00
  -4  16   1    2.60    2.40
  -4  16   1    0.90    2.50
  -4  16   1    1.40    1.00
  -4  16   1    1.40    0.90
   3 -16  -1    5.10    2.50
  -3  16   1    5.70    2.60
  -3  16   1    5.30    2.60
   2 -16  -1    8.80    2.50
   2 -16  -1   11.90    2.60
  -2  16   1    9.70    2.80
  -2  16   1    7.80    2.50
  -2  16   1   14.30    2.90
  -2  16   1    4.70    2.60
   1 -16  -1    6.80    2.20
   1 -16  -1    6.80    2.40
  -1  16   1    7.30    2.70
  -1  16   1    7.30    2.40
  -1  16   1    9.20    2.60
  -1  16   1    5.50    2.40
   0 -16  -1   22.80    3.20
   0 -16  -1   27.10    3.50
   0  16   1   24.80    3.40
   0  16   1   30.40    3.60
   0  16   1   23.30    3.30
   0  16   1   23.20    3.50
  -1 -16  -1    3.50    2.40
   1  16   1    9.60    2.60
   1  16   1    9.40    2.80
   1  16   1    5.60    2.60
   1  16   1    5.00    2.50
  -2 -16  -1    5.10    2.60
  -2 -16  -1    3.80    0.90
   2  16   1    3.50    0.90
   2  16   1    7.00    2.50
   2  16   1    6.50    1.00
   2  16   1    3.70    2.10
   2  16   1    3.50    1.00
   2  16   1    2.30    2.40
   2  16   1    4.50    0.90
   2  16   1    2.00    2.50
  -3 -16  -1    0.70    2.10
   3  16   1    2.60    1.10
   3  16   1    1.70    2.30
   3  16   1    1.90    2.00
   3  16   1    2.40    2.40
   3  16   1    2.70    2.10
   3  16   1    3.30    1.10
  -4 -16  -1    5.70    2.90
   4  16   1   11.60    2.80
   4  16   1    7.90    2.30
   4  16   1    9.10    2.80
   4  16   1    7.80    2.70
   4  16   1    9.70    1.50
   4  16   1   10.60    1.50
  -5 -16  -1   11.70    3.10
   5  16   1    6.90    2.10
   5  16   1    9.70    1.70
   5  16   1    5.20    2.60
   5  16   1    6.40    2.80
   5  16   1    9.80    1.70
   5  16   1    9.80    2.50
  -6 -16  -1    1.20    2.30
   6  16   1    2.30    2.40
   6  16   1   -0.10    1.50
   6  16   1    0.50    1.50
   6  16   1   -4.50    2.20
   6  16   1    1.60    2.00
  -7 -16  -1   -0.40    2.10
   7  16   1   -0.20    2.60
   7  16   1    0.90    1.50
   7  16   1    0.60    2.10
   7  16   1    1.10    1.60
   7  16   1   -1.30    2.10
  -8 -16  -1    4.00    2.50
   8  16   1    1.10    1.60
   8  16   1    1.90    2.20
   8  16   1    4.90    2.40
   8  16   1    0.40    1.60
   8  16   1    4.00    2.70
  -9 -16  -1    1.00    2.60
   9  16   1    5.00    3.10
   9  16   1   -0.10    2.10
   9  16   1    3.10    2.50
   9  16   1    0.00    2.00
   9  16   1    4.00    1.90
 -10 -16  -1   -0.40    2.70
  10  16   1    0.40    3.00
  10  16   1    2.60    2.20
  10  16   1   -0.40    2.20
  10  16   1    0.70    2.30
  10  16   1   -1.60    2.10
 -11 -16  -1    8.50    3.30
  11  16   1    8.10    2.70
  11  16   1    7.30    3.00
  11  16   1    5.90    3.20
  11  16   1    2.00    2.50
  11  16   1    1.20    2.40
 -12 -16  -1    1.30    3.00
  12  16   1    0.70    2.80
  12  16   1    4.30    2.60
  12  16   1    1.70    2.50
  12  16   1    2.60    2.60
  12  16   1    2.90    2.60
 -13 -16  -1   29.30    4.30
  13  16   1   40.00    4.50
  13  16   1   30.00    4.30
  13  16   1   31.80    4.50
  13  16   1   28.80    3.90
  13  16   1   28.10    4.20
 -14 -16  -1   -6.50    2.70
  14  16   1    0.60    3.10
  14  16   1   -1.80    2.70
  14  16   1   -1.20    2.70
  14  16   1    4.60    3.30
  14  16   1   -1.20    3.10
 -15 -16  -1   -7.40    2.70
  15  16   1   -1.00    3.10
  15  16   1    3.00    3.20
  15  16   1   -0.40    2.90
  15  16   1    2.40    3.30
  15  16   1   -2.10    2.80
   5 -17  -1   -0.20    1.00
   5 -17  -1   -1.30    2.30
  -5  17   1    0.20    2.60
  -5  17   1    2.20    1.20
  -5  17   1   -0.40    1.20
   4 -17  -1    0.40    0.80
   4 -17  -1    1.10    2.30
  -4  17   1    0.60    1.00
  -4  17   1    0.30    2.50
   3 -17  -1    6.20    2.40
  -3  17   1    1.90    2.80
  -3  17   1    1.10    2.40
   2 -17  -1   13.50    2.90
  -2  17   1   18.50    3.20
  -2  17   1   24.70    3.30
  -2  17   1   18.70    3.40
  -2  17   1   16.50    3.10
   1 -17  -1    3.70    2.10
   1 -17  -1    4.10    2.40
  -1  17   1    5.60    2.70
  -1  17   1    1.30    2.50
  -1  17   1    0.20    2.50
  -1  17   1    6.80    2.60
   0 -17  -1   -2.40    2.00
   0 -17  -1    2.80    2.40
   0  17   1    1.90    2.60
   0  17   1   -2.60    2.30
   0  17   1    2.00    2.10
   0  17   1    0.60    2.40
  -1 -17  -1    2.10    2.60
  -1 -17  -1    2.50    1.90
   1  17   1    6.70    2.80
   1  17   1    3.50    2.10
   1  17   1    2.20    2.50
   1  17   1    8.40    2.80
  -2 -17  -1    7.20    1.00
  -2 -17  -1    4.60    2.80
   2  17   1    7.50    2.70
   2  17   1    7.50    2.70
   2  17   1    5.90    2.70
   2  17   1    5.90    2.30
   2  17   1    6.00    1.00
   2  17   1    6.00    1.10
   2  17   1    6.80    1.00
  -3 -17  -1    0.50    2.60
   3  17   1    0.50    1.10
   3  17   1   -0.90    1.10
   3  17   1   -1.10    2.20
   3  17   1    0.10    2.00
   3  17   1   -1.40    2.30
   3  17   1   -1.60    2.30
  -4 -17  -1   39.40    4.40
   4  17   1   41.70    3.70
   4  17   1   34.20    3.90
   4  17   1   35.30    2.50
   4  17   1   32.70    3.80
   4  17   1   37.60    4.10
   4  17   1   34.90    2.60
  -5 -17  -1    5.60    2.60
   5  17   1    7.30    2.60
   5  17   1    3.60    1.60
   5  17   1   -1.40    2.30
   5  17   1    1.30    2.50
   5  17   1    4.40    1.50
  -6 -17  -1    0.20    2.40
   6  17   1    6.70    1.80
   6  17   1    6.20    2.90
   6  17   1    2.80    1.60
   6  17   1    4.80    2.80
   6  17   1    3.50    2.50
  -7 -17  -1    1.00    2.40
   7  17   1    1.80    2.60
   7  17   1    6.40    2.70
   7  17   1    4.30    2.20
   7  17   1    1.80    1.70
   7  17   1    3.70    1.80
  -8 -17  -1    1.40    2.50
   8  17   1    2.60    1.80
   8  17   1    1.90    2.50
   8  17   1    8.20    2.40
   8  17   1    5.80    2.80
   8  17   1    6.80    1.90
  -9 -17  -1    3.60    2.40
   9  17   1    3.70    2.10
   9  17   1    0.70    1.80
   9  17   1    1.70    2.70
   9  17   1    3.30    2.60
   9  17   1    0.80    3.00
 -10 -17  -1   12.20    3.10
  10  17   1   10.80    3.50
  10  17   1   13.80    3.40
  10  17   1   10.00    2.70
  10  17   1    9.10    2.60
  10  17   1   11.20    2.90
 -11 -17  -1    2.50    3.10
  11  17   1    3.30    2.90
  11  17   1    0.10    2.50
  11  17   1    0.90    2.50
  11  17   1    2.60    2.80
  11  17   1   -0.80    2.40
 -12 -17  -1    1.50    3.10
  12  17   1    4.30    3.00
  12  17   1    2.40    2.70
  12  17   1    2.20    3.40
  12  17   1    6.50    2.90
  12  17   1    5.10    2.90
 -13 -17  -1    2.30    3.30
  13  17   1    1.30    3.00
  13  17   1    5.10    3.20
  13  17   1    2.90    3.30
  13  17   1    0.70    2.70
  13  17   1    2.20    3.00
 -14 -17  -1   -0.20    2.60
  14  17   1    1.70    2.90
  14  17   1    2.60    3.20
  14  17   1    2.90    3.20
  14  17   1    1.00    3.20
  14  17   1    2.00    2.90
   3 -18  -1    1.00    2.20
  -3  18   1   -2.30    2.20
  -3  18   1   -3.20    2.80
   2 -18  -1    0.90    2.40
  -2  18   1    1.10    2.40
  -2  18   1   -1.00    2.50
   1 -18  -1    1.60    2.10
   1 -18  -1    4.00    2.70
  -1  18   1   -2.60    2.70
  -1  18   1    2.80    2.60
  -1  18   1    2.00    2.40
  -1  18   1    3.40    2.30
   0 -18  -1   13.50    2.70
   0 -18  -1    4.60    2.70
   0  18   1   14.70    2.90
   0  18   1    9.00    2.90
   0  18   1   16.00    3.20
   0  18   1   12.10    3.10
  -1 -18  -1    2.20    2.70
  -1 -18  -1    3.70    2.30
   1  18   1    2.40    2.60
   1  18   1    3.50    2.20
   1  18   1    5.60    2.60
   1  18   1    4.40    2.70
  -2 -18  -1    3.10    2.20
  -2 -18  -1   -4.70    2.60
   2  18   1    4.20    1.00
   2  18   1    0.00    2.40
   2  18   1    1.40    0.90
   2  18   1    0.70    2.40
   2  18   1    3.70    2.70
   2  18   1    1.50    2.20
  -3 -18  -1    2.80    2.60
   3  18   1    3.60    2.60
   3  18   1    5.60    1.30
   3  18   1    3.20    2.40
   3  18   1    4.60    2.70
   3  18   1    3.80    1.20
  -4 -18  -1    0.70    2.90
   4  18   1   -2.40    2.50
   4  18   1    0.70    2.10
   4  18   1    0.70    1.30
   4  18   1   -0.80    2.40
   4  18   1    2.10    1.30
  -5 -18  -1    2.20    2.50
   5  18   1    3.70    2.60
   5  18   1    7.50    2.90
   5  18   1    4.20    2.70
   5  18   1    4.30    1.60
   5  18   1    3.70    1.60
  -6 -18  -1    8.60    3.00
   6  18   1   11.30    3.10
   6  18   1    5.50    1.90
   6  18   1    6.70    3.00
   6  18   1    6.90    1.90
   6  18   1    6.70    2.80
  -7 -18  -1    3.70    3.10
   7  18   1    3.00    2.70
   7  18   1    6.10    2.00
   7  18   1    5.50    2.80
   7  18   1    5.00    2.70
   7  18   1    3.20    1.90
  -8 -18  -1    5.70    2.60
   8  18   1    5.70    2.70
   8  18   1    4.10    2.00
   8  18   1    8.90    2.10
   8  18   1    7.30    2.90
   8  18   1   11.60    3.20
  -9 -18  -1   11.60    3.40
   9  18   1   17.90    3.60
   9  18   1    9.60    2.80
   9  18   1   10.80    2.40
   9  18   1   15.20    2.70
   9  18   1   11.40    3.20
 -10 -18  -1    7.10    3.40
  10  18   1   14.00    3.00
  10  18   1    7.70    2.70
  10  18   1   13.40    3.20
  10  18   1    6.90    2.90
  10  18   1   13.00    3.60
 -11 -18  -1   -4.00    3.00
  11  18   1    2.20    3.40
  11  18   1    3.30    2.70
  11  18   1    0.10    2.60
  11  18   1    5.80    3.40
  11  18   1   -1.30    2.70
 -12 -18  -1    2.40    3.50
  12  18   1    0.70    3.00
  12  18   1   -5.40    2.70
  12  18   1   -2.00    2.60
  12  18   1   -2.70    2.50
  12  18   1    2.30    3.10
 -13 -18  -1   -2.00    3.40
  13  18   1   -0.80    3.00
  13  18   1    0.80    2.90
  13  18   1   -3.90    2.60
  13  18   1   -7.20    3.20
  13  18   1    3.70    3.20
   2 -19  -1    0.20    2.20
  -2  19   1    1.90    2.90
  -2  19   1    0.50    2.70
   1 -19  -1   10.20    2.80
  -1  19   1   10.80    3.30
  -1  19   1    6.50    2.70
  -1  19   1    6.60    2.90
  -1  19   1   10.10    3.20
   0 -19  -1    0.50    2.00
   0 -19  -1   -1.90    2.40
   0  19   1    0.30    2.50
   0  19   1    0.40    2.60
   0  19   1   -1.00    2.50
   0  19   1   -1.20    2.80
  -1 -19  -1    0.00    2.60
  -1 -19  -1    1.40    2.30
   1  19   1   -2.80    2.30
   1  19   1    0.60    2.50
   1  19   1    3.00    2.60
  -2 -19  -1   -1.20    2.70
   2  19   1    4.10    2.90
   2  19   1    4.70    2.70
   2  19   1    5.40    1.20
   2  19   1    5.20    2.90
  -3 -19  -1    8.30    3.40
   3  19   1    8.00    1.50
   3  19   1    8.30    2.60
   3  19   1    9.40    3.30
   3  19   1    4.10    2.90
   3  19   1    5.80    1.20
  -4 -19  -1   -1.70    2.90
   4  19   1    0.10    2.70
   4  19   1    1.00    2.80
   4  19   1   -0.40    1.20
   4  19   1    4.50    1.50
   4  19   1    0.30    2.70
   4  19   1    2.70    1.40
  -5 -19  -1    0.30    3.00
   5  19   1    7.40    3.10
   5  19   1    5.90    2.60
   5  19   1    5.00    1.70
   5  19   1    4.40    1.70
   5  19   1    4.50    2.70
  -6 -19  -1   -1.30    3.00
   6  19   1    1.00    2.80
   6  19   1    0.50    1.70
   6  19   1   -3.40    2.40
   6  19   1    2.40    2.70
   6  19   1   -1.60    1.60
  -7 -19  -1   -1.10    2.50
   7  19   1    2.90    2.90
   7  19   1    0.80    2.80
   7  19   1   -3.10    2.20
   7  19   1    0.50    1.80
   7  19   1    1.10    1.90
  -8 -19  -1    8.60    3.40
   8  19   1    6.00    2.90
   8  19   1    2.80    2.70
   8  19   1    5.40    2.10
   8  19   1    5.60    2.20
   8  19   1    7.10    2.90
  -9 -19  -1    3.70    2.60
   9  19   1    9.90    2.80
   9  19   1    7.50    3.40
   9  19   1    4.20    2.20
   9  19   1    4.40    2.90
   9  19   1    5.90    2.30
 -10 -19  -1    0.40    2.90
  10  19   1   -6.80    2.70
  10  19   1    2.40    2.20
  10  19   1   -2.90    2.80
  10  19   1    3.90    2.50
  10  19   1    1.60    2.80
 -11 -19  -1    5.00    3.40
  11  19   1    3.40    3.20
  11  19   1    8.00    3.50
  11  19   1    6.30    2.80
  11  19   1    1.70    2.80
  11  19   1    4.90    3.60
 -12 -19  -1    0.60    3.70
  12  19   1    2.10    2.90
  12  19   1    2.60    3.10
  12  19   1    1.60    2.80
  12  19   1    3.10    3.10
  12  19   1   -0.90    3.10
  -1 -20  -1    0.80    2.80
   1  20   1    1.90    2.70
   1  20   1   -6.40    2.70
   1  20   1   -1.10    2.80
  -2 -20  -1    9.50    3.40
   2  20   1    5.40    1.30
   2  20   1    1.90    2.90
   2  20   1   -0.40    2.80
   2  20   1    9.90    3.20
  -3 -20  -1   -1.10    2.50
   3  20   1    2.60    2.80
   3  20   1    2.00    1.40
   3  20   1    3.40    2.90
   3  20   1    4.10    3.00
   3  20   1    1.40    1.20
  -4 -20  -1    3.20    2.80
   4  20   1    3.70    1.60
   4  20   1    0.80    3.00
   4  20   1    1.90    2.80
   4  20   1    1.00    1.30
   4  20   1    6.40    3.10
  -5 -20  -1    3.70    3.40
   5  20   1    2.40    3.10
   5  20   1    0.50    3.00
   5  20   1    2.20    1.60
   5  20   1    1.30    2.80
   5  20   1   -0.30    1.60
   5  20   1   -0.30    1.40
  -6 -20  -1   -2.00    3.20
   6  20   1    2.50    1.90
   6  20   1   -2.40    2.60
   6  20   1    0.90    3.10
   6  20   1   -0.90    1.80
   6  20   1   -2.50    2.90
  -7 -20  -1   -5.80    2.40
   7  20   1    5.30    3.00
   7  20   1    1.80    3.10
   7  20   1    4.60    2.20
   7  20   1   -2.90    3.00
   7  20   1    3.20    2.10
  -8 -20  -1   -1.80    3.20
   8  20   1    0.50    2.20
   8  20   1   -3.80    2.50
   8  20   1    2.20    2.80
   8  20   1    1.70    2.20
   8  20   1    0.90    2.90
  -9 -20  -1    2.60    2.70
   9  20   1    0.60    3.00
   9  20   1   -0.60    2.10
   9  20   1    0.60    2.10
   9  20   1    4.90    3.30
   9  20   1   -0.50    2.60
 -10 -20  -1    4.30    3.50
  10  20   1    3.50    3.00
  10  20   1    2.80    2.30
  10  20   1    5.20    2.90
  10  20   1    5.00    3.20
  10  20   1    2.10    2.30
[truncated: 3,398,268 more chars]
